# Supplementary material for: Phosphorylation of SHP2 at Tyr62 Enables Acquired Resistance to SHP2 Allosteric Inhibitors in FLT3-ITD–Driven AML
Source: Oxford University Press journal article supplement (doi:10.1158/0008-5472.can-21-0548), 2022-03-21
Supplement: can-21-0548_table_s2_suppst2.xlsx [file can-21-0548_table_s2_suppst2.xlsx]

## Sheet: header description
Supplementary Table S2. Proteomics analysis of MV-4-11 and MOLM-13 treated with SHP099
Header	description
PG.ProteinGroups	protein group accession
MOLM13_DMSO_1h_R1	input data from Spectronaut
MOLM13_DMSO_1h_R2
MOLM13_DMSO_1h_R3
MOLM13_DMSO_1h_R4
MOLM13_DMSO_24h_R1
MOLM13_DMSO_24h_R2
MOLM13_DMSO_24h_R3
MOLM13_DMSO_24h_R4
MOLM13_DMSO_72h_R1
MOLM13_DMSO_72h_R2
MOLM13_DMSO_72h_R3
MOLM13_DMSO_72h_R4
MOLM13_Res_1h_R1
MOLM13_Res_1h_R2
MOLM13_Res_1h_R3
MOLM13_Res_1h_R4
MOLM13_Res_24h_R1
MOLM13_Res_24h_R2
MOLM13_Res_24h_R3
MOLM13_Res_24h_R4
MOLM13_Res_72h_R1
MOLM13_Res_72h_R2
MOLM13_Res_72h_R3
MOLM13_Res_72h_R4
MOLM13_S9_1h_R1
MOLM13_S9_1h_R2
MOLM13_S9_1h_R3
MOLM13_S9_1h_R4
MOLM13_S9_24h_R1
MOLM13_S9_24h_R2
MOLM13_S9_24h_R3
MOLM13_S9_24h_R4
MOLM13_S9_72h_R1
MOLM13_S9_72h_R2
MOLM13_S9_72h_R3
MOLM13_S9_72h_R4
MV411_DMSO_1h_R1
MV411_DMSO_1h_R2
MV411_DMSO_1h_R3
MV411_DMSO_1h_R4
MV411_DMSO_24h_R1
MV411_DMSO_24h_R2
MV411_DMSO_24h_R3
MV411_DMSO_24h_R4
MV411_DMSO_72h_R1
MV411_DMSO_72h_R2
MV411_DMSO_72h_R3
MV411_DMSO_72h_R4
MV411_Res_1h_R1
MV411_Res_1h_R2
MV411_Res_1h_R3
MV411_Res_1h_R4
MV411_Res_24h_R1
MV411_Res_24h_R2
MV411_Res_24h_R3
MV411_Res_24h_R4
MV411_Res_72h_R1
MV411_Res_72h_R2
MV411_Res_72h_R3
MV411_Res_72h_R4
MV411_S9_1h_R1
MV411_S9_1h_R2
MV411_S9_1h_R3
MV411_S9_1h_R4
MV411_S9_24h_R1
MV411_S9_24h_R2
MV411_S9_24h_R3
MV411_S9_24h_R4
MV411_S9_72h_R1
MV411_S9_72h_R3
MV411_S9_72h_R4
minEvidenceCount	Minimum number of ions reported for this protein group (used for DEqMS variance estimation)
MOLM13_DMSO_1h_R1_censored	censored data (removed the lowest signal: cutoff 0.2%)
MOLM13_DMSO_1h_R2_censored
MOLM13_DMSO_1h_R3_censored
MOLM13_DMSO_1h_R4_censored
MOLM13_DMSO_24h_R1_censored
MOLM13_DMSO_24h_R2_censored
MOLM13_DMSO_24h_R3_censored
MOLM13_DMSO_24h_R4_censored
MOLM13_DMSO_72h_R1_censored
MOLM13_DMSO_72h_R2_censored
MOLM13_DMSO_72h_R3_censored
MOLM13_DMSO_72h_R4_censored
MOLM13_Res_1h_R1_censored
MOLM13_Res_1h_R2_censored
MOLM13_Res_1h_R3_censored
MOLM13_Res_1h_R4_censored
MOLM13_Res_24h_R1_censored
MOLM13_Res_24h_R2_censored
MOLM13_Res_24h_R3_censored
MOLM13_Res_24h_R4_censored
MOLM13_Res_72h_R1_censored
MOLM13_Res_72h_R2_censored
MOLM13_Res_72h_R3_censored
MOLM13_Res_72h_R4_censored
MOLM13_S9_1h_R1_censored
MOLM13_S9_1h_R2_censored
MOLM13_S9_1h_R3_censored
MOLM13_S9_1h_R4_censored
MOLM13_S9_24h_R1_censored
MOLM13_S9_24h_R2_censored
MOLM13_S9_24h_R3_censored
MOLM13_S9_24h_R4_censored
MOLM13_S9_72h_R1_censored
MOLM13_S9_72h_R2_censored
MOLM13_S9_72h_R3_censored
MOLM13_S9_72h_R4_censored
MV411_DMSO_1h_R1_censored
MV411_DMSO_1h_R2_censored
MV411_DMSO_1h_R3_censored
MV411_DMSO_1h_R4_censored
MV411_DMSO_24h_R1_censored
MV411_DMSO_24h_R2_censored
MV411_DMSO_24h_R3_censored
MV411_DMSO_24h_R4_censored
MV411_DMSO_72h_R1_censored
MV411_DMSO_72h_R2_censored
MV411_DMSO_72h_R3_censored
MV411_DMSO_72h_R4_censored
MV411_Res_1h_R1_censored
MV411_Res_1h_R2_censored
MV411_Res_1h_R3_censored
MV411_Res_1h_R4_censored
MV411_Res_24h_R1_censored
MV411_Res_24h_R2_censored
MV411_Res_24h_R3_censored
MV411_Res_24h_R4_censored
MV411_Res_72h_R1_censored
MV411_Res_72h_R2_censored
MV411_Res_72h_R3_censored
MV411_Res_72h_R4_censored
MV411_S9_1h_R1_censored
MV411_S9_1h_R2_censored
MV411_S9_1h_R3_censored
MV411_S9_1h_R4_censored
MV411_S9_24h_R1_censored
MV411_S9_24h_R2_censored
MV411_S9_24h_R3_censored
MV411_S9_24h_R4_censored
MV411_S9_72h_R1_censored
MV411_S9_72h_R3_censored
MV411_S9_72h_R4_censored
MOLM13_DMSO_1h_R1_censored_normalised	log2-transformed data after vsn normalisation
MOLM13_DMSO_1h_R2_censored_normalised
MOLM13_DMSO_1h_R3_censored_normalised
MOLM13_DMSO_1h_R4_censored_normalised
MOLM13_DMSO_24h_R1_censored_normalised
MOLM13_DMSO_24h_R2_censored_normalised
MOLM13_DMSO_24h_R3_censored_normalised
MOLM13_DMSO_24h_R4_censored_normalised
MOLM13_DMSO_72h_R1_censored_normalised
MOLM13_DMSO_72h_R2_censored_normalised
MOLM13_DMSO_72h_R3_censored_normalised
MOLM13_DMSO_72h_R4_censored_normalised
MOLM13_Res_1h_R1_censored_normalised
MOLM13_Res_1h_R2_censored_normalised
MOLM13_Res_1h_R3_censored_normalised
MOLM13_Res_1h_R4_censored_normalised
MOLM13_Res_24h_R1_censored_normalised
MOLM13_Res_24h_R2_censored_normalised
MOLM13_Res_24h_R3_censored_normalised
MOLM13_Res_24h_R4_censored_normalised
MOLM13_Res_72h_R1_censored_normalised
MOLM13_Res_72h_R2_censored_normalised
MOLM13_Res_72h_R3_censored_normalised
MOLM13_Res_72h_R4_censored_normalised
MOLM13_S9_1h_R1_censored_normalised
MOLM13_S9_1h_R2_censored_normalised
MOLM13_S9_1h_R3_censored_normalised
MOLM13_S9_1h_R4_censored_normalised
MOLM13_S9_24h_R1_censored_normalised
MOLM13_S9_24h_R2_censored_normalised
MOLM13_S9_24h_R3_censored_normalised
MOLM13_S9_24h_R4_censored_normalised
MOLM13_S9_72h_R1_censored_normalised
MOLM13_S9_72h_R2_censored_normalised
MOLM13_S9_72h_R3_censored_normalised
MOLM13_S9_72h_R4_censored_normalised
MV411_DMSO_1h_R1_censored_normalised
MV411_DMSO_1h_R2_censored_normalised
MV411_DMSO_1h_R3_censored_normalised
MV411_DMSO_1h_R4_censored_normalised
MV411_DMSO_24h_R1_censored_normalised
MV411_DMSO_24h_R2_censored_normalised
MV411_DMSO_24h_R3_censored_normalised
MV411_DMSO_24h_R4_censored_normalised
MV411_DMSO_72h_R1_censored_normalised
MV411_DMSO_72h_R2_censored_normalised
MV411_DMSO_72h_R3_censored_normalised
MV411_DMSO_72h_R4_censored_normalised
MV411_Res_1h_R1_censored_normalised
MV411_Res_1h_R2_censored_normalised
MV411_Res_1h_R3_censored_normalised
MV411_Res_1h_R4_censored_normalised
MV411_Res_24h_R1_censored_normalised
MV411_Res_24h_R2_censored_normalised
MV411_Res_24h_R3_censored_normalised
MV411_Res_24h_R4_censored_normalised
MV411_Res_72h_R1_censored_normalised
MV411_Res_72h_R2_censored_normalised
MV411_Res_72h_R3_censored_normalised
MV411_Res_72h_R4_censored_normalised
MV411_S9_1h_R1_censored_normalised
MV411_S9_1h_R2_censored_normalised
MV411_S9_1h_R3_censored_normalised
MV411_S9_1h_R4_censored_normalised
MV411_S9_24h_R1_censored_normalised
MV411_S9_24h_R2_censored_normalised
MV411_S9_24h_R3_censored_normalised
MV411_S9_24h_R4_censored_normalised
MV411_S9_72h_R1_censored_normalised
MV411_S9_72h_R3_censored_normalised
MV411_S9_72h_R4_censored_normalised
gene	gene name
Res_P.Value_MOLM13	output of DEqMS analysis of protein groups ("sca" are the outputs from DEqMS, the others are the ones from Limma, Res is res Vs DMSO; S9 is SHP099 Vs DMSO) = MOLM13 =
Res_adj.P.Val_MOLM13
Res_sca.P.Value_MOLM13
Res_sca.adj.pval_MOLM13
S9_P.Value_MOLM13
S9_adj.P.Val_MOLM13
S9_sca.P.Value_MOLM13
S9_sca.adj.pval_MOLM13
log2FC-Res_MOLM13	log2-transformed fold changes compared to DMSO (mean) =MOLM13 =
log2FC-S9_MOLM13
Res_P.Value_MV411	output of DEqMS analysis of protein groups ("sca" are the outputs from DEqMS, the others are the ones from Limma, Res is res Vs DMSO; S9 is SHP099 Vs DMSO) = MV411 =
Res_adj.P.Val_MV411
Res_sca.P.Value_MV411
Res_sca.adj.pval_MV411
S9_P.Value_MV411
S9_adj.P.Val_MV411
S9_sca.P.Value_MV411
S9_sca.adj.pval_MV411
log2FC-Res_MV411	log2-transformed fold changes compared to DMSO (mean) =MV411 =
log2FC-S9_MV411
count-MOLM13_DMSO_1h	count-… = number of measured value per condition; meanMV-… = mean per condition (without any imputation); meanNoMV-… = mean per condition (when no measured values, it is imputed with low value)
mean-MOLM13_DMSO_1h
meanNoMV-MOLM13_DMSO_1h
count-MOLM13_DMSO_24h
mean-MOLM13_DMSO_24h
meanNoMV-MOLM13_DMSO_24h
count-MOLM13_DMSO_72h
mean-MOLM13_DMSO_72h
meanNoMV-MOLM13_DMSO_72h
count-MOLM13_Res_1h
mean-MOLM13_Res_1h
meanNoMV-MOLM13_Res_1h
count-MOLM13_Res_24h
mean-MOLM13_Res_24h
meanNoMV-MOLM13_Res_24h
count-MOLM13_Res_72h
mean-MOLM13_Res_72h
meanNoMV-MOLM13_Res_72h
count-MOLM13_S9_1h
mean-MOLM13_S9_1h
meanNoMV-MOLM13_S9_1h
count-MOLM13_S9_24h
mean-MOLM13_S9_24h
meanNoMV-MOLM13_S9_24h
count-MOLM13_S9_72h
mean-MOLM13_S9_72h
meanNoMV-MOLM13_S9_72h
count-MV411_DMSO_1h
mean-MV411_DMSO_1h
meanNoMV-MV411_DMSO_1h
count-MV411_DMSO_24h
mean-MV411_DMSO_24h
meanNoMV-MV411_DMSO_24h
count-MV411_DMSO_72h
mean-MV411_DMSO_72h
meanNoMV-MV411_DMSO_72h
count-MV411_Res_1h
mean-MV411_Res_1h
meanNoMV-MV411_Res_1h
count-MV411_Res_24h
mean-MV411_Res_24h
meanNoMV-MV411_Res_24h
count-MV411_Res_72h
mean-MV411_Res_72h
meanNoMV-MV411_Res_72h
count-MV411_S9_1h
mean-MV411_S9_1h
meanNoMV-MV411_S9_1h
count-MV411_S9_24h
mean-MV411_S9_24h
meanNoMV-MV411_S9_24h
count-MV411_S9_72h
mean-MV411_S9_72h
meanNoMV-MV411_S9_72h
ReplacedMV_log2FC_MOLM13_Res_1h_Vs_MOLM13_DMSO_1h	log2-transformed values after replacement of missing values when no detection in one condition (using meanNoMV)
ReplacedMV_log2FC_MOLM13_Res_24h_Vs_MOLM13_DMSO_1h
ReplacedMV_log2FC_MOLM13_Res_72h_Vs_MOLM13_DMSO_1h
ReplacedMV_log2FC_MOLM13_S9_1h_Vs_MOLM13_DMSO_1h
ReplacedMV_log2FC_MOLM13_S9_24h_Vs_MOLM13_DMSO_1h
ReplacedMV_log2FC_MOLM13_S9_24h_Vs_MOLM13_DMSO_24h
ReplacedMV_log2FC_MOLM13_S9_72h_Vs_MOLM13_DMSO_1h
ReplacedMV_log2FC_MOLM13_S9_72h_Vs_MOLM13_DMSO_72h
ReplacedMV_log2FC_MV411_Res_1h_Vs_MV411_DMSO_1h
ReplacedMV_log2FC_MV411_Res_24h_Vs_MV411_DMSO_1h
ReplacedMV_log2FC_MV411_Res_72h_Vs_MV411_DMSO_1h
ReplacedMV_log2FC_MV411_S9_1h_Vs_MV411_DMSO_1h
ReplacedMV_log2FC_MV411_S9_24h_Vs_MV411_DMSO_1h
ReplacedMV_log2FC_MV411_S9_24h_Vs_MV411_DMSO_24h
ReplacedMV_log2FC_MV411_S9_72h_Vs_MV411_DMSO_1h
ReplacedMV_log2FC_MV411_S9_72h_Vs_MV411_DMSO_72h

## Sheet: Proteome_DEqMSOutput
PG.ProteinGroups	MOLM13_DMSO_1h_R1	MOLM13_DMSO_1h_R2	MOLM13_DMSO_1h_R3	MOLM13_DMSO_1h_R4	MOLM13_DMSO_24h_R1	MOLM13_DMSO_24h_R2	MOLM13_DMSO_24h_R3	MOLM13_DMSO_24h_R4	MOLM13_DMSO_72h_R1	MOLM13_DMSO_72h_R2	MOLM13_DMSO_72h_R3	MOLM13_DMSO_72h_R4	MOLM13_Res_1h_R1	MOLM13_Res_1h_R2	MOLM13_Res_1h_R3	MOLM13_Res_1h_R4	MOLM13_Res_24h_R1	MOLM13_Res_24h_R2	MOLM13_Res_24h_R3	MOLM13_Res_24h_R4	MOLM13_Res_72h_R1	MOLM13_Res_72h_R2	MOLM13_Res_72h_R3	MOLM13_Res_72h_R4	MOLM13_S9_1h_R1	MOLM13_S9_1h_R2	MOLM13_S9_1h_R3	MOLM13_S9_1h_R4	MOLM13_S9_24h_R1	MOLM13_S9_24h_R2	MOLM13_S9_24h_R3	MOLM13_S9_24h_R4	MOLM13_S9_72h_R1	MOLM13_S9_72h_R2	MOLM13_S9_72h_R3	MOLM13_S9_72h_R4	MV411_DMSO_1h_R1	MV411_DMSO_1h_R2	MV411_DMSO_1h_R3	MV411_DMSO_1h_R4	MV411_DMSO_24h_R1	MV411_DMSO_24h_R2	MV411_DMSO_24h_R3	MV411_DMSO_24h_R4	MV411_DMSO_72h_R1	MV411_DMSO_72h_R2	MV411_DMSO_72h_R3	MV411_DMSO_72h_R4	MV411_Res_1h_R1
A0A024RBG1;Q9NZJ9	85729.1	45258.1	109446	89556.8	72626.1	119524	114941	104465	94249.6	110454	115230	152075	37393.5	70757.9	71900.2	69712.1	61039.6	89824.2	79236.5	91064.5	80079.3	97839	57032.7	82407.7	54654.9	72179	89112.9	76546.4	51342	78778	80439.3	74535.2	60018.7	56812.5	69667.6	90022.9	60801	62551.8	76572.3	47218.1	62758.2	60304.2	62640.2	64331.5	62344.4	99400.4	91681.1	87650.5	52331.8
A0A0B4J2D5;P0DPI2	123279	58360.4	92538.3	123283	121198	164293	81827.1	61454.6	148565	79977.8	188341	104555	90994.1	195004	166118	146146	173095	78389.4	179141	83605.9	89636.6	100628	85302	180966	88287	107370	131566	121901	112094	69843.9	153514	139736	151001	77046	166671	86917.7	128363	120738	146732	117923	122193	118546	129735	135019	119746	213610	185587	173907	171447
A0A0U1RRL7	NA	19760	34464.7	56847	54187.5	79462.2	56709.3	33406.7	67332.2	34073	68126.8	60596.4	47594.1	67962.9	51571	54413.5	66116.3	30586.2	65686	34835.6	33252	50403.1	59157.7	66913.8	39056.7	56884.5	51864.5	55752.8	34718	42046.8	44595.4	44399.9	29659.5	33669.3	40664.4	35739.4	56923.1	50813.1	82261.3	54765.3	49606.4	61880.2	61277.4	49429.2	93512.8	116250	98368.3	88404	66381.8
A0AV96	39210	44661.4	104690	45642.2	32127	51505.6	NA	NA	45088.7	47419.6	94047.3	NA	58220.4	71461.1	58166.6	52851.5	51695.9	64550.7	59155.3	104975	53171.4	63417.6	54269.3	60041.2	25622.2	36897	49178.7	47162.4	33522.8	35876.8	55020.5	39140	26465.4	31364.8	36337.3	84701.6	NA	NA	NA	NA	NA	3954.93	NA	7262.95	NA	NA	NA	NA	NA
A0AVT1	112983	87573.4	134164	115320	100301	133988	111314	124204	126375	97070	159179	150329	84986.6	124226	114123	104915	113353	92457.8	135228	135735	94235.6	108159	105708	132950	76031.5	98034.8	108387	112064	89850.7	85372.6	115813	116471	91201.8	68154.8	108211	105922	85223.4	91951.1	127411	90196.8	92442.2	98383.4	101706	105494	101464	155776	150930	134795	91247
A0FGR8	122922	91295.9	123806	127990	99142.6	137159	108241	102718	138814	107863	182701	140895	84071.8	129777	117514	113862	108177	83264.2	129194	107159	84017.3	103461	92655.9	133547	87415.7	104525	125213	129460	89437	89243.9	123048	121065	83120.6	66630	99295.8	91782	78902.7	97581.6	138879	92975.4	87296.6	101907	102409	99386	102152	150136	140122	136789	85140.8
A0JLT2	NA	92696.8	216932	196183	94852.4	134572	NA	147060	95478.3	98907.4	141644	249881	111983	138036	89000.2	130601	89614	79990.2	161773	190438	181944	76395.5	NA	90285.2	61463.2	66641.3	NA	107115	79643.2	NA	96178.2	138881	93117	15430.6	62969.1	186552	40325.3	38199.5	52695	117297	131423	127989	101423	101659	79689.2	201788	195092	147259	47320.2
A0JNW5	39662.4	28375.1	41425.5	41565.5	34674.2	55696.9	40574.1	32017.4	44914.5	34423.1	72769.2	39446	25372.2	43149.2	39830.3	32186.9	42231.1	25481.4	43792.5	37205.4	32799.3	35503.3	29317.6	47681.6	27336.1	33848.9	39545.5	43790.2	23423.3	29104.6	39185.1	38415.5	18809.9	16419.7	28481.9	22849.8	27019.1	35936.6	60499.2	32637.1	34382.1	40226	41529.7	39155.2	45311.9	63132.7	60031.2	57823.4	26474.3
A0MZ66	43607.1	45407	57466.5	46077.2	40591	60077.3	66342.9	58398.7	48845.3	46362.6	70274.5	93071	51518.1	72682.2	54176.8	49415.4	60775.2	74272.4	64795.1	65518.6	58299	80931.4	59658.6	69551.3	29262.3	36612.5	44812.9	45781.5	30654.9	49993.8	49037.8	43663.2	34672.8	31246	47684.5	55342.1	35016.4	47879.2	72859.4	40456	42116	54941.8	61573.3	53794.1	64804.5	93482.4	77860.3	63647	65578.2
A1L0T0	111575	82028.6	124644	117842	104901	137752	130932	124815	135442	111587	174948	128129	103038	145920	116229	116942	129863	108308	142441	124609	111127	119788	114830	145697	75368.7	95402.1	100614	110024	84832.5	83248.6	124377	121747	93983.7	79318.2	106971	103860	55210.2	71850.5	123022	79335.7	79376.1	85775.2	95456.8	107602	97378.4	168736	147928	151140	83247.7
A2A288	50503.1	42607.9	86715	58848.9	45899.8	78748.9	33859.2	107722	58836.3	NA	93722	101784	53533.7	79789.7	79721.4	73139.8	78512.2	NA	99737.8	118616	62504.5	77198.5	78397.6	106661	31451.3	45672.6	55049.7	55525.8	40983	38134.2	67046.5	68473.9	46277.8	38380.2	63615.9	110564	28436.6	34242.7	66251.6	34062.6	37428	31171.8	45446.6	51099.6	40673.9	77059.2	70573.1	58715.5	37490.4
A2RRD8;Q96IR2	31031.9	NA	NA	47866.6	36537.5	51497.1	NA	NA	36289	NA	64826.3	NA	45794.1	43433.1	53494	47244.7	NA	54894	NA	NA	NA	NA	NA	62478.9	NA	30689.8	41896	NA	38463.6	NA	NA	39277.5	27800.7	NA	NA	91213	49888.1	5570.92	12175.3	5951.46	8260.55	6109.57	6012.69	5759.29	7407.02	17397.5	14696.2	12407	8606.82
A2RRP1	53075.1	49482.1	64600.1	63175.8	50468.8	77688.3	60363.1	74945.7	71040	67100.7	96252.4	81948.1	51339.9	71408.7	66748.6	65794.1	64569.4	62737.9	73862.3	69506.3	63960.9	75931.1	67906.6	79264	38106.2	48152.9	58545.3	62407.9	43257.3	53803.4	66342.5	60729.4	42511	36488.6	53628.5	56340.9	23853.8	27909.3	56474.6	32391.6	33237.6	37415.3	38814.2	47462.1	44375.8	75639.3	64167.2	62006.1	39061.4
A2RTX5	137737	145149	181060	169314	131002	201300	165948	166878	213742	154796	257942	226725	157734	167182	169813	147708	153769	138365	170312	175827	168438	181117	154777	193221	103094	142604	156804	175762	119328	118328	154642	141955	110480	103049	147975	138764	90255.1	107061	159580	114508	113662	124203	129116	133404	133784	183520	201449	206638	115546
A2RUS2	112876	79988.2	131078	106171	97743	125391	99181.9	108021	132425	107906	160738	163912	59082.1	101773	88861.1	79833.5	93718.5	80089.4	99260.9	104564	80841	84348.6	78850.7	101978	78427.2	95481.4	111853	104347	83952.9	71352.9	104609	91356	83922.2	60283.8	92399.2	87402.1	112555	122401	150746	112901	115330	115326	120176	135977	114977	176341	171782	154062	102091
A3KMH1	101299	102908	147009	99364.4	101695	149377	143266	132215	145592	124555	178551	160958	94690.7	140033	107621	110907	128746	127686	114400	121872	127290	123903	112889	130979	77171	90707.6	104619	104026	92342.4	95277.2	106051	97808.8	107069	76681.7	114381	141700	35751.3	41473.8	79768.5	45450.8	54620	55363.9	51387.1	66203.3	73633.4	126321	100260	91232.7	58170.2
A3KN83	113121	94267.8	150920	139122	106864	166074	145244	145620	154538	118914	176263	163880	86971	128530	120795	120241	98048.2	99694	133081	142173	116974	135791	108438	159595	80582.4	113447	123470	141823	70261.5	79583	96618.2	103791	69842.7	66038.6	74538.7	82028.9	77913.5	101206	175759	106863	95365.4	109715	126077	130160	134798	188535	196961	184167	89674.1
A4D1E9	43356	33227.5	45295.8	49366.4	39017	63253.2	47813.8	45488.8	78479.8	47936.9	80693.6	56544.3	33740.2	45674.1	44830.5	39128	36566.9	31984.4	56613	42623.3	49592.3	52487.3	45633	66487.4	29393.9	34955.9	46870.8	45533.9	22508.8	27209.8	38339.9	33813.3	12422.9	19600.2	27536.3	20147.5	15511	17012.8	40744	20394.1	24394	27384.3	34622.8	34086.2	43287.8	63399.4	65756	63025.4	28475.7
A4D1P6	97817.5	78200.3	120323	99323.1	81896.6	115874	105331	104929	94382.6	75367.1	123824	135251	95623.4	142013	118071	109689	116650	107961	139409	127639	110735	126525	105592	127752	62466.1	87440.1	99783	100320	68690.2	87346.9	101126	106076	86579	75295.3	114820	111987	64194.3	71745.7	114125	65918.8	70961.7	77128.5	82094.5	73044.6	77604.6	139834	103584	84227.7	101321
A5PLL7	NA	45355.1	44526.7	50319	NA	73995.8	49211.1	47319.5	75109.3	44314	52891	58528.3	47581.3	76764.8	47158	41707.1	60798.7	NA	56636.3	44368.2	58449.1	49486.9	43010.2	48335.7	35323.2	43673.4	40119	44284.1	35964	30624.5	40794.3	39746.9	26303.1	25159	39377.3	48135.7	102673	38894.8	49305.1	40291.3	52445.7	45909.5	48425.5	52877.9	56362.8	84219.5	72324	54604.8	46071
A5PLN9	94312.2	NA	NA	NA	91286	94014.3	NA	NA	96681.7	NA	85610.3	NA	68924.4	110130	106954	95044.1	103136	85049.7	NA	NA	84902.6	NA	NA	105027	64287.9	66991.6	82294.6	88176.8	68072.7	NA	83925	NA	70880.2	NA	84934.1	NA	119724	24413.4	19389.2	135943	37226.1	23950.9	181229	20988.5	210031	40882.4	328253	NA	51152.8
A5YKK6	91706.3	79333.8	116510	101702	85566.3	123545	110898	116339	124360	95856.3	147586	134614	77749.1	110265	102366	98628.1	93541.5	87174.4	115852	112817	97440.4	113400	98745.1	128885	64240.6	83031.5	96587.8	101851	67868.3	79005.6	98343.6	96518	64709.8	57590.9	87353.9	95548.9	76767.9	85968.8	135867	92058.1	90460.9	98220.8	109396	110742	116434	174653	169532	157456	92320.6
A6NC98	28352.2	26078.9	40325.9	28334.6	31458.9	37849.8	45341.9	39054.6	36068	25309	38076.3	39999.9	30831.8	39186.2	35391.4	30566	36834.6	43056.2	42632	42108.1	40752.3	44835.3	44868.4	36096.1	17317.4	21958.2	23371.8	22071.6	21508.1	27467.1	27610.2	27687.5	23953.9	28913.4	32746.7	40158.1	21310.7	25749.2	35623.4	22717.9	26222.1	30429.1	30074.3	33314.8	25473.5	48936.1	36337.7	43061.1	27835.1
A6NCC3;F8WBI6	98287.8	91371.9	143436	96924.1	71569.9	104265	93380.8	106657	127882	101263	154803	161386	90212.5	149432	123232	109741	106428	98975.8	112564	125784	86987	115577	95898.4	140757	67712.1	86913.4	107563	94238.6	58243.4	75160.2	83001.8	79851.1	66389	56528.9	85440.2	91468.2	39398.2	54685.3	68335.6	49324.2	47220.3	57516.2	47091.3	54656.2	50555.5	64441	72962.2	56326.9	55067.5
A6NCE7;Q9GZQ8	86488.7	140836	NA	86212	88701.6	131298	NA	365020	152434	145897	155780	NA	66292.5	138992	115941	114058	109248	156699	147646	483174	78823.4	169864	152333	177270	60642.1	69891.2	76564.6	110756	NA	97824.2	92048.2	96366	61114.9	44580.8	68192.5	NA	71157.6	87681.7	151464	90634.3	121603	111984	128569	136215	155889	297814	234574	181079	105403
A6NDG6	106808	85641	150182	104707	90968.1	128441	111229	153854	123404	105627	163623	138076	86286.3	127627	112793	113424	106836	94934.4	134826	145215	98271.1	115570	110754	134616	68901.1	87475.5	105882	105525	79630.3	75759.1	108528	102455	68582.8	58042.5	93546.5	94641.4	82300.3	110275	166987	112732	112143	117744	131442	137108	130595	189919	179966	172101	121918
A6NDU8	56509	45601.9	83572.1	49157.9	41444.4	47722.5	47831.5	55969.8	73477.4	56811.4	71968.9	106576	44227.8	58368.4	57109.4	55339.5	60614.5	47741.8	71965.1	54973.6	35548.9	68507.7	64525	64695.7	36125.9	44071.2	55748.7	59532	40238	45380	39441.1	32077.4	17845.7	22740.7	34730.9	44537.7	41382.2	62367	69892.5	58319.3	33150.4	51244.3	68155.8	50015.3	57019.7	111258	87899.1	71065.1	57461.6
A6NED2	27311.4	NA	NA	NA	32825.1	15291.6	NA	NA	28080.5	37053.7	38652.5	NA	33227.1	25472.1	NA	32349.8	23227.7	47110.7	31507.7	NA	NA	NA	NA	35277	24601.5	9825.32	NA	27782.8	29915	38622.5	NA	NA	7256.62	NA	NA	NA	18954.9	12056.7	NA	10678.2	9281.04	13432.6	NA	12511.4	7713.06	24860.7	NA	32300.4	26127.1
A6NHR9	91617.7	74465.7	116240	96093.2	83306.1	114793	98298.1	96988.2	114662	90625.1	137760	122474	66863.4	88572.8	85836	76321.7	82610	71543.7	97620.9	87969.3	75466.4	86549.3	78374.4	90206.9	66423.1	81320.7	92028.9	97093.4	73891.5	79926	94240.8	94579.6	74417.3	64017.3	90733.6	88856.2	82998.5	86445.7	126530	87264.9	87178.1	94166	106343	104014	104390	165821	149910	135113	79081.6
A6NHT5	20865.6	NA	NA	28278.2	31810.1	79812.2	NA	79820.1	57070.5	65500.3	42091.2	78054.5	77900.7	108880	89359.8	105478	85405.7	56328.8	83357.5	84484.8	101587	87944.7	85018.1	135694	9947.85	21036.7	NA	NA	33816	NA	16412	NA	8429.26	NA	NA	NA	45779.5	57699.4	97183.4	72302.4	57959.5	63505.8	64382.4	67232.6	74031.1	94556.6	92662.3	89612.3	79704.2
A6NIH7	58398.5	42205.4	90247.3	76657.6	44736.1	70840.7	71453.9	63668.5	65501.4	55117.1	84113.9	77478.4	47091	73778.9	74816.1	67766.1	74031.5	61174.5	83736.9	74440.2	61214.4	72630	60258.6	77085.6	36688.2	47485	50460.5	65510.6	64532.1	53821.9	77388.6	83344.4	44980.9	34595.2	64195.7	68479.7	79765.5	96894	124381	95095	82160.1	104945	109406	105562	98723.7	166111	138471	135653	80296.8
A6NJ78	19315.3	16320.8	28034.6	23350.3	14804.7	29406	25935.2	28380.4	29778	21406.3	37895.6	23843.1	15037.3	19907.4	18804.7	18517.4	16065	17077.1	23928.2	23648.4	20234.8	23764.1	21810.3	26067.3	11468.2	15265	20450.8	22417.6	12407.3	16026.3	17345.3	17067.5	9095.47	11276.3	17131.8	17491.6	6003.19	8875.46	14761.1	8571.61	8461.55	9391.56	12455.8	11079.8	11581.5	20309.9	20328.8	18937.9	9720.77
A6NJG2	51919.5	52029.1	81251.7	67415.9	60628	69987.1	63067	58970.7	65816.9	71939.9	91418	NA	70340	59812.5	59769.1	65140.5	61901.4	63908.4	78826.1	74621.5	93988.4	96048.1	66130.1	80035.7	33475.8	51735.5	65828.9	63991.3	45648.3	77427.8	53640.5	61007	49492.8	47962.4	71575.8	74690.8	36244.2	41414.4	64165.9	45975	51137.5	46208.4	56049.9	66416.8	55329.8	90220	75128.3	80435.5	49332.5
A6NMY6	333574	232508	344613	346028	322660	407738	298872	308829	292018	211097	473689	278872	365418	559507	511182	456793	477179	387810	594995	463094	318187	403596	385895	499162	231264	256657	315740	341669	306425	285370	414503	428562	331320	280529	488148	321401	306597	364485	500154	308353	323987	398383	409698	362630	401925	665402	537112	374174	406365
A8CG34	86318.4	90753.7	118500	113743	73569.3	148779	130303	106597	118475	104425	149739	124148	88178.4	110572	98004.2	108527	85266.8	99080.7	129927	106433	109192	131623	106666	121078	56054.4	78015	127315	119769	54297.4	86087.9	94710.9	92775.6	66130.5	47531.8	82231.6	57492.3	51280.1	82588.3	148517	79255.5	80628.9	97013.8	112411	97372.7	120034	186549	164892	168739	88366.6
A8MWD9;P62308	297813	84528.9	117071	328219	294614	387773	174523	101214	369989	108255	438959	101245	110026	288772	279265	238995	266901	89498.6	289526	87137.2	108079	141640	73748.7	308316	194464	248493	278339	318466	208206	107695	299463	272440	188002	50748.3	251540	50694.4	226964	219237	315094	223481	258722	251174	230894	283303	349204	456231	412093	423847	223425
A8MXV4	128711	105665	176710	130351	119227	164408	146522	143659	176182	142628	219936	235352	100966	146173	134953	129126	135598	115440	157743	149945	133326	141482	124055	157954	84944.5	117129	124416	129524	105335	115230	146855	147727	132391	101414	148261	136837	81247.8	110643	145201	103941	104194	105586	115617	126859	121745	169106	158350	165978	119845
A9UHW6	26171.6	34514.7	4912.37	25684.8	21833	32651.9	24490.6	76112.8	32900.4	19402.6	39405.5	36940.8	28810.2	32094.7	29785.9	27914.7	30421.7	27558.9	44879.7	53092.1	34841.6	39680.7	32035.2	40245.9	11476	11828.8	20345.3	21824	19996.1	9445.33	30102.2	26080.7	18930.1	17781.6	27566.4	41577.2	19405.6	24108.6	45361.9	24180.2	33734.2	33532.6	37873.4	37093.4	34864.5	80238	59456.6	53014.6	35943.7
B0I1T2	134258	107860	166358	141651	133406	158172	127871	122254	136985	119420	194968	167387	137565	239423	220510	202032	224167	186358	255059	204747	175045	200852	150633	207721	94940.2	127495	153280	135718	141671	136844	178120	173052	207566	141139	212476	176515	193217	221232	274209	196464	218699	231417	234395	240053	185768	332910	297346	244999	295052
B7ZAQ6;P0CG08	37764.6	26825	75293.2	55687.4	42913.3	39612	84552.6	NA	50604.4	29404.3	59974.5	NA	24962.3	34548.4	44247.6	39758.6	31295.6	13806.2	51513	NA	32449.2	34138.4	48340.9	42471.3	25994	24620.5	43790	57401.8	32265.2	14714.3	45984.1	62658.9	30074.2	29149.9	47237	42850	22805.1	41499.7	38841.8	32495.1	26905.4	28722.3	40383	33093.7	30970.6	49068	59943.9	39007.9	38475.6
B7ZBB8	299129	178456	280040	231665	237345	178571	216884	170254	156151	162123	239056	244526	152078	263788	314509	260228	272350	159005	325506	222227	132711	168135	192975	263817	195744	178455	272664	248013	219298	155553	258782	260586	151732	80933	181692	136078	NA	NA	NA	NA	NA	NA	NA	NA	NA	NA	NA	NA	NA
C4AMC7;Q6VEQ5	74702.2	66134.9	101841	86201.7	65606.8	94004.7	101535	74656.1	85939.4	84790	113839	111798	75543.8	106584	102028	96792.3	93801.8	84827.9	133069	87665	90692.2	105675	90052.2	115206	49039.4	72408.6	77889.4	81491.7	56666.2	72483.5	85141.9	86159.9	54991.1	54829.3	79429.7	67300.2	50262.7	57586.8	93001.4	60200	58221.3	73709.1	72670.7	77205.7	68159.8	117454	108321	98472.6	72987.1
C9JLW8	70643.4	55954.5	77735.8	72448.5	68944.5	88716.2	77251.4	65803.9	106242	70501.3	116231	98536.4	NA	76722.8	83980.8	78234.3	85147.1	65666.5	103139	73215.8	68149.5	76341.4	64106.5	80212	47645.5	65679.5	73824.9	70364.9	60900.9	51709.7	77669.6	74066.6	38087.9	37286.8	52843.6	35696.1	57086.3	62085.3	87244.9	69916.8	58438.6	65694.3	80299.3	70163.9	75771.3	87717.2	105886	91798.8	105532
E9PAV3;Q13765	439847	354645	526085	469286	373435	571308	520513	519559	558283	423093	617994	516041	324900	447533	402304	375109	373381	318639	495542	457632	396590	443164	391213	521116	314215	387818	452593	479340	271357	296942	417560	390718	231161	214547	345122	362105	285193	335411	499527	372019	355921	366741	437864	482045	437326	626273	599744	602215	317165
E9PRG8	82751.3	115195	144665	103222	98515.8	150071	111675	90440.2	125184	65410.3	123068	NA	97773.3	112799	119069	105747	105358	83756.9	152531	122856	96710.3	116802	119478	122321	62857.9	94134.9	109236	115691	88244.9	66509.4	94547.9	91902.7	61156.4	66158.3	77689.9	44326.6	71940.8	86780.6	123510	106444	83656.3	112492	159890	101451	125888	149213	201974	150150	75954.9
L0R6Q1	112839	98957.1	193387	134070	118054	165894	163480	140826	147211	131186	242459	191247	141786	161704	160184	149234	171240	152346	203108	177529	158797	174736	192299	198795	84658.4	129724	168250	146848	95142.9	100585	140752	127424	105616	145222	142312	170259	137629	119674	166937	119138	125126	134823	163940	146297	148926	243947	200968	166359	168512
L0R819	78013.4	69554.9	127989	79511.7	82738.4	116955	112704	88533.1	113952	87658.9	128352	136393	72616.7	97598.4	77350.5	68354.2	83597.3	75206.7	81981.3	95205.9	90622.6	93601.6	82502	99553.8	64501	80364	76802.7	75321.2	55301.3	60899	71430.1	72155.3	28411.1	31288	44566.3	77998.9	78409	85076.7	121027	75285.2	78713.4	93799.9	95815	93689.1	104210	163282	129261	119808	77766.3
O00115	37848.3	NA	NA	58338.6	98589.7	109921	91037.1	NA	74064.7	NA	137947	NA	114429	134575	123027	115546	173926	157349	176783	174271	137811	156816	150945	150925	40661.1	43294.2	61905.9	38069.4	152072	134510	202161	200968	125670	155916	226768	188117	32388.3	58716.6	NA	NA	NA	NA	NA	35806.5	NA	96568.5	NA	NA	50662.3
O00116	185072	141928	188671	202640	180161	246176	170700	176267	236518	179583	208507	215662	137952	216374	189948	186656	197928	135439	221981	176682	164317	184852	136766	223342	136442	171422	182234	207276	156240	155554	202423	211266	188465	131634	207561	184951	151708	155838	233860	151695	178224	180583	190941	200709	194788	295355	254780	251926	177650
O00124	39676.5	30928.4	44432.1	33914.5	39640.6	62821.3	42457.8	38503.4	50017.5	27912	44343.3	30976.6	23270.4	32829	25092.6	23907.2	37802.1	27706.6	36132	30302.5	36524.3	35996.6	29459.7	39751.5	22901.1	33932.2	37543.9	38829.1	15964.5	17382	20139.1	20420.7	18777.7	10049	19443.2	12916.5	10918.8	23980.1	29952.4	18728.7	17660.6	27163.2	26207.6	24475.8	26119.2	42569.4	33338.6	28999	17346.8
O00139	105004	92117.9	132795	117398	98128.1	151446	130527	127867	149445	113117	174482	151911	86172.7	119439	108079	102554	104521	91311.4	138816	122322	108819	115029	110074	149261	76943.9	98840.7	107334	114224	72213.1	79485.5	101451	102452	69654.2	61391.9	88719.8	109180	89003	97362.1	141565	98512.2	103145	104550	112296	119849	135572	181263	188008	171088	90257.6
O00142	26380	NA	NA	38852.9	30093.7	47587.1	16991.2	NA	30465.1	NA	62228.5	NA	NA	42496.8	36749.8	40178.7	39105.9	NA	44466.6	NA	NA	NA	NA	46968.4	19844.6	23483.3	30474.1	36435	25783.2	13018.8	42002.1	43092.7	32210.6	NA	40443	NA	33005.2	22429.9	47047.5	27074.3	28200.2	27909	31642.9	34126.3	34527.8	79936.7	58043.2	54255.3	47516.9
O00148	434918	333581	483476	440642	390118	528516	469379	433098	557557	418959	661056	588115	342944	460669	417044	396935	416964	347983	496922	425236	383663	444224	381373	540082	312689	374313	451357	437485	352777	341382	442779	445307	371639	261889	432676	410253	362052	397840	568380	382127	398275	429217	453440	461763	446915	682243	632309	588331	345837
O00151	182348	161112	188858	233073	200472	268119	169354	179851	238245	149093	270949	170579	261953	491230	367499	342817	406487	240865	346451	232769	242667	227713	166670	372190	146009	202560	228982	236840	191220	151731	263392	255471	178447	123491	215880	152332	118256	141458	176382	122244	107969	133849	147190	142868	134481	196304	182562	150748	211888
O00154	125362	110920	146623	134134	112375	162648	144541	142483	165000	131819	208036	177009	97225.7	149255	126703	125637	114033	100572	157296	139702	111686	127690	130868	164376	87228.8	117177	132402	136944	95928.1	92299.4	134816	121646	80720.5	75744.7	93402.2	137253	133301	151138	212330	156602	161270	160849	181405	188568	201385	290055	312745	288730	137440
O00159	83445.8	64503.2	95066.1	88595	75916.7	100587	81821.9	88990.4	92713.6	76431	118075	89826.2	78148	128764	122756	116006	117450	99640.9	148558	111018	93871.7	103917	102445	141833	56392.2	70966	89732	87375.2	69563.9	70347.2	98612.9	96538.3	73311.9	55236.3	94854.6	93330.5	93439.3	109870	154543	103410	126051	130700	134736	132342	120993	193869	178156	156122	137488
O00160	105219	74459.9	118091	106906	94777.1	124752	104752	94308.1	120171	90951.4	153148	136705	93796.2	160578	141963	131304	133661	108889	168457	129231	111391	125074	112615	163546	71063.5	87388.9	107531	104964	92362.9	86669.3	121589	120056	105153	74898.2	123133	116682	87554.6	100621	142911	103501	96271.5	113029	122259	131437	110969	188901	168126	146698	112937
O00161	60760.8	58547.3	201784	77194.5	65980.9	93510.7	61734.5	79969.3	87751.2	61512.4	102762	209170	49252.3	95918.2	94876.6	82567.5	66212.9	56682.2	102149	134310	59878.4	72364.1	86987.4	102169	44460.3	58159.4	68774.8	74026.1	53503.2	41938.9	77963.6	78494.2	48072.3	71839.9	66617.8	179472	69946.1	80374.2	108739	66398.2	68308.8	88012.7	100115	86237.1	98869.4	147660	137064	127449	75098.3
O00165	39895	29349.3	44080.5	49552.4	36791.5	60314.8	42476.3	49447	83129.2	49292.5	92384.8	49150.8	24333.3	51718.8	49267.6	42604.4	38455.9	25548	55074.5	44334.5	41206.1	44132.5	42021.3	66961.1	27164.3	36198.9	45937.7	47358.8	26296.5	25266.9	42364.9	36878.5	19980.8	NA	31177.5	NA	31899	51465.4	51377	30724.2	35440	42360.5	45230.3	43383.7	48856.1	86405.6	67766	73669.2	27867.4
O00170	113085	77676.4	112614	117354	104601	143570	112069	93731	132813	89605.3	172125	115645	80293.5	141850	117150	114721	125890	85076.9	143089	99933.9	91212.5	113079	101259	147466	77422.9	95400.9	109439	109948	89263.7	78906.3	119852	117183	79333.9	54004.8	104186	84965.3	107303	128568	197509	128634	125062	146085	148822	163390	142121	227988	216497	213807	122706
O00178	83109.8	61144.4	102443	96505.1	77055	120155	86672.4	100466	123497	86908.4	147988	113336	70090.5	115438	98957.8	95965.9	105077	79641.9	113181	103119	79984.2	96547.6	91871.5	111602	61033.8	83055.8	89910.6	96442	67635.4	67789.9	97705.2	86267.3	65576.4	53160.3	83995	65552	67710.4	78987.8	110980	73460.1	85868.9	83125.7	85642.6	88180.3	90865.2	135569	127989	106402	75576.3
O00182	115487	100837	135756	138552	115838	168353	137416	118212	164318	110302	200104	150094	105705	157259	146287	143030	132032	120429	170496	140840	134030	140122	128241	172895	80008.9	113968	136594	147229	85890	97482.7	143966	127031	78091.7	60965.1	109320	94314.8	85121.7	107878	193759	123857	105674	143226	147388	145536	158152	257355	241479	215028	142319
O00186	184179	151820	226470	182850	165420	229575	184254	216236	199132	162272	235155	258690	138701	215624	184021	180576	190119	173006	226342	207600	170560	168269	192537	205743	127404	161855	170642	179031	155244	142937	208962	207996	172279	144529	199433	210314	164276	163323	218994	144793	174664	180819	174479	174680	170917	278699	239882	203091	167339
O00193	64798.2	69731.6	91979.2	69737.8	59832.5	96840.5	77463.4	110323	98875.6	97672.4	108585	125619	75797.4	88418.4	71004.1	71492	73752.6	106450	79912	98571.6	94065.8	91117.1	77743.8	88003.3	41173.2	54435	60813	69577	44026.6	73943.9	56160.9	58695.4	33352.1	49466.3	44854.7	92086.6	46571	57824.8	104320	54938.5	58269	65491.5	76245.9	70814	81710.6	109859	116034	122562	59162.2
O00203	109932	98106.5	153885	120735	105686	141105	138983	136760	140385	124388	177265	178392	110057	152965	137562	127301	137476	130698	158489	156228	146705	155024	137226	161274	80443.5	103527	122269	119300	90842.5	99188.6	127130	121679	90970.4	83476.1	122206	127695	94886.7	109137	154456	111358	111528	119843	129276	129987	128552	201757	189483	165910	121766
O00214	101054	90605.2	130926	109787	86781.1	117420	98173.3	115506	102935	90687.4	115944	123890	73382.9	112130	84646.2	86120.3	104071	87518.9	110560	113366	86201.8	105523	86364	113922	66487.4	89308.8	106917	99951.5	71668.4	84791.9	94952	110125	78154.2	74533.8	114046	120649	82984.4	56515.1	87393.8	63260.9	56621.8	65821.9	71784.8	69622.7	69485.4	109324	87043	76752.7	67448.9
O00217	90592.5	54414.2	93021.2	97086	92551.8	133322	123270	138669	128476	97212.1	157557	156573	67149.5	123322	116198	107914	101779	71318.1	122047	80764.2	86390.6	110968	114661	126842	61146.7	72373.2	85486.6	88675.5	77473.7	63725.8	98015.7	104499	76206.3	63920.7	91412.9	63272.6	61687	59804	115826	64662.7	66736.4	74281.5	87325.3	82304.7	75793.3	156491	118798	116943	85498.8
O00221	26915.2	29562.1	25674	33391.4	33185.7	50921.7	40617.1	25352.6	42747.9	22651.6	51907.8	96695.5	32801	49326.9	34233.4	29337.1	41325.3	41421.1	42392.4	NA	33025.5	58486.9	33717.3	36871.1	26367.2	26183	31598.5	34363.9	24818.8	34363.4	30553.7	28066.5	20732	NA	20864.6	NA	21734.8	28010.2	43272.1	26646.1	21631	27295.8	29314	30173.4	26898.6	60039.5	49559.2	44915.6	23466
O00231	141707	118700	187519	159038	127921	189829	169974	171224	193490	142203	230702	206846	120020	169117	161138	154927	150601	139956	185174	170392	146135	177595	150887	190256	99577.4	125453	158186	159348	104806	127060	156094	155807	96600.8	96016.8	137182	135256	111983	123220	182319	126384	126384	139893	146355	145649	162476	230638	229220	209263	118842
O00232	169785	126668	192855	180905	150011	220350	187707	190814	212258	168037	249095	236637	126543	200065	176484	166437	163536	145229	207840	193230	163557	186407	186262	213971	116454	151832	181415	182192	126917	139698	186212	175624	130525	119273	168825	185057	122912	139451	197779	147275	149331	151136	171528	165253	180763	257475	255965	237097	140824
O00233	64486.6	58543.2	99228.8	72837.1	62840.7	82572	59890.7	71175.7	71630.2	41826.2	89017.9	156892	51210	77459.7	68848.1	64934	64702.5	63664.2	86854.1	110700	59631.1	46805.8	55875.3	73999.3	45079.1	57129.2	72167.2	68553.6	49802	40881.3	77185.6	69137.1	50873.5	37287.1	68283.2	77632.1	75921.3	86691.7	98456.9	86742	80825.2	86797.3	97576.6	89648.3	96472.6	126485	113412	90104.1	80778.1
O00244	64661.5	58140.7	84430.5	80827.5	71901	97805.8	81459	75578.2	101846	68204.6	111444	105366	72649.4	96090.3	95349.2	83178.6	81600.6	64009.2	108829	87082	85489	91560.3	87169.6	113249	49963.9	62005	83445.7	79565.7	53601	52898.4	87563	73799.9	38603.6	33579.5	65098.5	61809.9	66018.1	72291.8	113564	69750.9	61426.1	78943.2	94684.6	82506.2	96945.1	159009	136231	115360	86248.1
O00255	69995.8	NA	NA	75723.7	61287.9	97927.5	103101	NA	87674.1	NA	103813	NA	NA	75202.5	72774.3	66306.2	76456	NA	86966.3	NA	NA	53155.8	102885	96668	42486.3	54714.5	71156.6	74098.2	50048	NA	64461.4	61444.4	51940.2	NA	58909.5	NA	73587.7	47409.2	94542.2	42093.3	54117.2	53134.1	59616.6	51849.4	85301.4	144650	152671	123269	72742.8
O00264	99732.7	74072.2	132511	107807	90550.4	129960	120717	112127	119400	102658	144746	111924	83843.1	103118	99017.7	94847.6	101249	90364.5	124388	121397	104081	108638	110208	131467	68926.9	67688	93828.2	98507.3	75165.8	84568.3	106025	102118	83878.3	60487.1	89661.6	99026.4	69733.9	72955.5	97820.9	66006.8	66071.3	77597.5	78012.3	79189	82535.1	127473	117012	104413	70728.6
O00267	86849.9	72916.1	107303	98520.7	79769.8	121296	98434.4	95798.2	113158	86708	135594	120828	84793.8	122809	103961	102091	104754	85384.9	124654	120678	99188.1	104184	99036.6	125521	60910.7	83232.3	92613.5	96627	68219.7	73826.2	90957.4	93747.6	66972.5	61451.7	83189.9	87834.7	49166.6	66153.6	100613	63483.8	65788.6	71634.1	80433.1	77585.3	83060.6	121353	110631	107413	75133.5
O00268	NA	17776.1	25050.1	27753.3	24875.2	38721.4	NA	20194.2	37178.3	18357.2	32170.9	31235.1	23513.9	27277.6	34484.8	23659.6	35094.4	22634.5	37135.8	28012	23958.7	NA	25738.3	35862.5	19112.2	19818.3	24804	23144.6	21606.5	NA	18673.7	23097.8	21338.1	10941.5	23027.3	21285.5	36200.3	34036.6	46569.1	29055	31907.9	39004.2	32324.4	35941.4	39008.1	54678.2	48473.4	43540.3	28539.3
O00273	58509.6	60634.1	92640	75062.5	58041.3	86916.8	84916.1	84676.9	83434.3	71614.2	97121.4	124909	62141.9	74327.7	79689.9	72786.9	64711.3	65727.7	92602.3	93829.1	76360.2	72373.5	77703.2	89434.6	42757.1	58121.2	73607.5	79139.1	40445.3	53617.2	71580	64131.9	35776.2	26282.3	55475.4	64493.3	35702.2	42773.8	76783.5	47672.3	42818.6	53799	52723.1	57315.2	59815	97271.1	86435.4	85897.8	52986.4
O00287	3286.76	2559.97	NA	2689.24	3491.41	4331.41	3094.97	NA	2891.41	NA	5290.2	1705.87	2484.81	6524.7	2592.56	2839.63	3901.07	3107.31	4012.95	NA	2705.72	2772.52	2372.09	2315.78	1957.97	2139.5	2122.55	2899.88	1950.82	NA	1537.88	1694.03	1988.25	NA	2032.97	NA	7727.67	2634.29	5752.88	3119.97	2970.3	3573.07	6460.87	5216.56	4103.25	10081.4	8773.52	6434.2	5606.13
O00291	96935.5	84706.4	120826	95978.7	85738.4	109535	103079	99672.7	83978.5	89098.4	122173	119740	79069	112622	103393	104820	93862.1	88900	121368	116063	87218.1	98891.8	89713.9	105924	67449.9	78563.5	99426.5	94028.1	75908	81884.2	101038	94760.4	70290.7	69458.6	85659.8	82817	87094.9	101036	120249	84822.2	89823.6	107825	101978	91377.2	94723.4	148165	118392	93147.3	61022.9
O00299	966367	635974	887098	905772	812584	1.01581e+06	755936	703817	756820	582813	948336	722489	443877	721266	679382	601992	658878	469119	822686	590436	453347	479011	431157	574456	679788	701280	866790	860669	717138	553686	889579	850048	611559	399245	724437	461544	430915	492129	665869	471124	497479	570706	584405	605442	456480	709967	587187	540911	386162
O00303	232493	176135	286731	246350	205674	309567	252210	265659	298617	210516	346944	295441	185088	269835	246516	229479	217176	198896	283528	253581	217087	231057	237876	306136	159984	206471	246789	251808	159970	178510	232039	213476	138584	132544	202509	208436	151603	189923	273856	194112	204072	214061	231093	239694	237296	369925	356619	348269	188076
O00308	19710.1	9554.51	NA	32570.4	28610.2	39408.4	22438.7	28777.4	48474.8	24682	27147.3	30145.2	15446.4	35766	26501.4	24988.3	30007.4	20449.1	33973.6	30379.7	24115.6	25494	25442.6	29406	21858.9	28248	29695.2	24018.8	25585.2	NA	33525.1	29901	21238.5	NA	20350.6	19543.2	35411.8	42582.6	35259.4	34835.9	44799.1	NA	33437.6	20651.6	38365.9	41291.2	40255.2	34133	28539.7
O00329	37948.2	28864	36553.6	41327.1	37769.7	54719.2	40666	45215.3	53594.8	39004.3	68850.6	55740.5	41318.7	64324	50231.5	46602.2	49038.1	37980.6	52722.6	34577.2	43765.1	44570.9	43084.7	53492.8	23661.3	34516.5	37592.9	35602.5	31856.2	35307.8	43392.6	37366.8	30543.9	25500.1	40961.1	26567.3	50161.3	43770.7	72372.1	47742.6	48539.8	51866.8	54994.3	61619.2	60520.6	101515	88372.5	85120.4	57883
O00330	75228.3	60350.6	86559.7	75929.1	79224.7	89391	73964.6	77273.8	86571.9	65374.1	113985	108204	76545.1	90709.6	89728.6	78829.4	86678.8	69855.2	99276	92517.1	70093.4	77136.7	80139	99487.4	50478.7	66979.5	75432	76999	63775.9	58561.6	84507.6	90253.9	78636.9	62918	92374	94763	59850.5	54725.2	76841	54920.1	62231.5	58204.1	64072.6	65081	59039.3	94280.8	92411.5	83214	65639.4
O00391	58662.9	79440.3	79679.6	97328.8	90778.1	114362	73334.4	135212	91083.7	NA	71640.8	147014	72729.6	54754.3	288613	91194.4	134236	92350.9	107098	124581	90275.5	90122.1	56103.2	99021.6	72726.4	113378	71092.9	93804.5	62590.3	121375	81786.2	109404	92260.5	NA	NA	NA	283489	57167.9	99113.5	60022.2	142857	72070.8	97523.6	94704	100465	159596	84462.8	NA	94275.2
O00399	41692.3	115321	131056	73070.1	40408.7	107376	128328	111301	49137.2	121227	122544	NA	113505	82943.2	114064	75625.2	79292.1	114135	85737.4	NA	113884	110061	NA	97971.5	83900.7	59496.1	89050.5	87516.6	67072	142550	69288	50231	57413.8	92720.3	75233.2	125850	71081.1	100130	97689.4	84455.8	85471.3	84395.3	88808.7	79111.8	76077.2	137899	99871.5	115992	88044.7
O00400	65562.9	51570.6	57257	69962.5	49793.4	67268.8	61873.4	54079.5	50190.2	54988.5	79242.2	23637.1	48831.6	63830.2	57074.2	58122	60824	27609.1	86229.6	38554.5	46605.5	47526.2	38865.7	67725.6	50276.4	NA	65060.2	90346.9	61805.2	59356.2	82192.5	93948.1	76907.8	NA	82563.9	51776.2	45267	65710.1	62035.4	57345	59480.8	59092.4	58570.7	65773.9	60760.1	93001	70109.8	63200.4	86243.3
O00410	169831	136425	201684	193489	159220	243687	202470	188176	242456	167269	285233	201624	123720	193713	162742	159013	164661	128523	199562	159149	169709	170570	151448	190892	119679	161354	183242	183891	122706	129471	174128	173899	97210.1	83732.3	135582	118411	65478.3	96525.7	156943	108960	97007.4	106624	126485	137713	135689	195001	185144	198645	94280.9
O00411	57253.6	52889.7	95699.9	68069.8	58504.5	95994.3	68557.4	79715.7	112516	65884.1	109096	66459.7	31840.4	42835.5	46894.1	46712.1	41802.1	32574.7	65018.1	67690.8	46675.1	60631.4	50333.3	69612.8	37645.9	53228.3	61760.1	63923.4	24199.4	32060.5	37676.4	36442.1	20133.5	19429.4	28526.1	NA	40865.3	44021.1	75191.3	52629.3	62735.3	57608.8	60252.5	65284.8	66020.3	106418	91390.6	100494	48199.3
O00418	48687	42241.9	71686.7	55644.4	54276.6	66095.7	75271.7	72969.4	75035.1	57288.6	87629.2	79666.3	46616.2	60067.5	48232.9	50253.4	55743	52775.2	68856	90017.6	52322.6	57325.9	48563.6	72443.1	31383.9	43331.6	53581.5	50915.5	35543.5	40773.3	55063.3	53028.1	34792.7	28212.2	45394.2	43887.1	58800.2	66472.2	93567	67020.9	71327.2	71100.7	79903.6	76929.5	82429.4	119295	119962	104510	67658.8
O00422	41008.6	34687.4	48959	56396.2	36520.2	56826.9	51386.9	53924.6	49837.8	52234.1	66675	58136.5	41173	51475.3	44730.6	48363.8	42540.6	43885.2	49577.5	52198.8	45945.2	53704.1	49437.8	52817.9	28130.7	37031.4	45552.4	46898.6	32216.6	36727	47372.1	50821.8	31840.4	29547.8	46879.8	37639.2	30766.9	37274.8	49788.7	42191.3	37063.6	34577.5	45000.5	42583.6	52303.5	73007.1	70966.7	61321.1	38551.4
O00425	137638	111376	150512	145833	150376	166875	157889	116472	194697	130500	181493	149857	115420	135467	107752	134210	155084	80161.4	120664	118009	108504	98128.5	113903	110591	121106	135408	147582	128332	139917	103620	131754	125632	113534	76625.6	110037	122358	NA	NA	NA	NA	NA	NA	NA	130509	162479	NA	NA	174269	NA
O00429	113830	80391.3	113352	109970	107776	131647	111219	112354	131976	92050.3	160218	144800	94116.4	141962	128012	117070	136257	101692	158403	123211	104638	116172	102691	150990	74092.1	91535.1	108948	109413	94030.5	82247.7	124459	121755	93967.7	79363.7	120891	111762	79748.4	88534.8	129006	86419.4	95227.8	98773.4	109059	107958	103238	163833	148929	128022	94930.8
O00442	103997	71527.9	114198	109369	91375	113419	103797	100041	118255	84206.1	134488	109111	73251.3	101890	111061	80915	108683	72717.9	120786	91250.4	77063.8	80707.2	72952.2	103087	73938.1	93771.5	103189	104774	77499.8	70914.7	108580	99013.7	80166	63313.9	99920.8	86871.9	53191.3	75103.5	104030	70463.6	84390.2	82689.8	85984	83750.3	86136.1	124655	124549	112773	82416
O00443	40988.5	33513.9	16541.2	23265.1	41984.3	57646.7	15559.6	16662.3	49252.4	30725.7	57476.1	18093.3	34004.4	58871.9	26586.2	28834.5	49897.5	20886.1	27383	24299.1	48073.3	25815.2	15925	38810.2	34372.4	33751.2	17107	24204.6	37046.7	17878.7	20321.3	23386	28113.1	8663.97	17816.6	17576.5	14661.5	25266.2	23825.1	7667.71	21760	14101.1	7557.91	18479	NA	31851.7	23534.7	27761.6	18623.6
O00453	NA	NA	NA	NA	NA	NA	NA	NA	NA	NA	NA	NA	NA	20748.2	NA	NA	NA	NA	NA	NA	NA	NA	NA	NA	NA	NA	29730.1	NA	NA	NA	NA	NA	30254	NA	NA	NA	52586.3	54549.4	74505.6	44239.1	47916.3	52844.1	57158	49634.8	54420.9	101045	76423.3	74939.6	45292.4
O00459	96927.8	80388.7	105410	97150	89076.4	139160	114388	95955.6	120026	86051.9	162220	192890	79369.2	100278	119681	100375	101071	107016	116228	NA	113054	110445	94903.1	116741	63026.8	83843.6	105638	103293	63708.1	72921	102703	80897.9	61363.3	51251.6	99399.6	80418	75701.9	58858.6	136507	68033.3	64728.7	93914.2	93556.2	105311	88210.4	187159	177174	128842	79732.8
O00461	9351.84	6136.56	16632.3	9234.64	8362.05	12016.2	13884.4	7439.89	11618.8	8003.54	11648.6	18551.4	6580.77	10085.7	9356.95	7950.31	9523.64	9178.22	10874.6	12253.8	9497.51	13617.7	12449.6	13172.6	5090.95	7562.07	8745.16	9756.36	4183.88	NA	6328.45	6168.53	3858.87	10321.4	NA	NA	11908	9983.22	19800.7	9413.4	10846.8	13130	13774.1	11382.4	16174.5	22614.9	18425.5	18913.5	11849.3
O00462	76050.4	NA	NA	100216	90439.9	77024.8	59130.1	NA	78312.5	81358.7	181003	NA	78015.1	149432	140289	132153	115695	90254	155448	107380	98512.6	104672	91344.8	153193	67914.6	75947.3	75850.4	110564	93111.2	87367.5	109706	119822	125391	69035.9	144240	88517	63432.7	102137	137016	97273.4	102957	104685	107477	127780	120536	197490	149166	138222	160760
O00468	NA	NA	NA	NA	NA	NA	NA	NA	33506.3	NA	NA	NA	NA	52240.7	59621.5	48230.2	32704	23696.9	46167.5	40377.4	27812.4	31693.1	33358.5	49358.3	12878.3	NA	NA	44232.5	NA	NA	50010	NA	11682.9	NA	NA	NA	30973.1	23558.7	38829.7	26191.4	30304.8	31105.6	37095	42721.7	23741.7	58380.8	56044.8	53384.7	42869.3
O00471	77326.7	59751.7	73439.2	89982.3	62745.4	93757.6	90184.1	72674.7	96865.9	71381.2	128434	85947.2	60218.5	86152.7	93223.4	80330.9	80797.5	62957.2	114229	96089.8	82249	83620.9	61903.8	106767	60144.6	65585.1	83268.7	87750.6	54222.9	59612.9	80346.7	76659.9	55808.7	45971.1	83876.9	55800.1	74919.5	82538.6	110916	76882.6	87739	88749.4	86418.1	89168.8	96147.2	140720	132150	115679	76931.5
O00483	186522	76431.1	130585	240037	216980	334842	102518	50217.1	291673	74828.9	323218	50880.8	94017	270993	246311	215806	189156	61996.5	253550	61192	60207.8	87023.3	101169	175224	144646	212433	203229	221119	213439	84019	297539	251479	198634	100932	227437	25266.1	268348	186898	170897	228832	205182	192957	248942	246351	220785	320493	270512	198114	238541
O00487	123446	114380	180510	150803	118566	183526	131347	144030	167120	155746	198868	181417	91832	147201	134272	142399	123570	108914	167949	185113	133878	141362	150336	170323	92370.1	115567	139514	144786	103673	103750	154417	144810	111079	104989	129536	169316	110954	126718	177638	120580	120044	122782	143203	140659	142420	226356	213370	209782	117365
O00488	102395	91240.2	144236	109910	90303.3	151943	135739	117981	93827.7	84028	86247.1	NA	76631.6	87603.4	91481.6	91577.9	79928	104640	113088	150842	94019.9	147064	67239.9	98916.6	68106.2	69802.4	92615.9	102384	31831.7	NA	56023.4	45534.4	27826.5	NA	NA	NA	88639.2	72416	175781	123891	116981	126908	135138	116243	140932	224250	168134	128998	84427.7
O00505	157171	124068	185897	168232	144607	214811	166992	155428	209828	150502	255885	200120	113026	168694	154380	147312	149606	119186	177120	148303	146391	153062	148226	184693	110907	128991	161198	163463	106054	105651	149044	140338	86204.2	70743.1	120944	113929	57091.5	80676.2	126410	84038.7	86277.8	82577.3	101553	103330	108939	161519	157916	146335	74544.7
O00506	156536	127337	198499	176595	164307	203427	173403	183011	178424	152170	238683	212794	118867	181768	153709	146975	165317	132056	215645	169565	148697	153883	146793	215803	122078	145396	170257	161673	132075	120816	155875	150434	127763	87327.7	150783	154819	125055	155425	185831	134611	171026	154600	150611	168842	170850	242839	222249	200986	135283
O00519	44903.4	57189.6	79530.6	64167	45507	61517.5	86181.6	84567	64958.2	82926.1	106415	83895.4	36645.7	54676.7	57688	59164.6	50968.9	51504.9	64652.3	64349.6	62024.6	77089.1	69556.9	67784.5	26998.5	40947.5	50412.9	58592.7	42645	56053	62094.8	52717.8	38525.7	44985.5	54589	60050.8	NA	NA	NA	NA	NA	NA	NA	NA	NA	NA	NA	NA	NA
O00534	NA	NA	NA	NA	NA	NA	NA	NA	NA	NA	NA	NA	NA	20728.1	NA	NA	NA	16319.9	17961	NA	NA	14159.6	NA	NA	NA	NA	NA	NA	11555.3	NA	11658.4	9071.2	16845	NA	28143.4	24212.6	28160.1	24244.6	17264.1	6487.33	26312.6	20745.5	8722.97	14590	17884.5	34907.9	11409.4	NA	33070.7
O00541	82762.9	65953.1	105251	98386.5	75809.4	129616	100892	104164	120948	89719	135696	111983	59500.7	84176.5	85614.9	80764.2	71532.8	69674.3	103779	90870.5	83491.6	86807.9	83801.4	101906	55453	73014.9	96550.4	96815.9	51180.6	55087.1	77871.1	75860.6	46881.9	40177.1	69462.4	69191.4	60279.2	66474.6	103095	74808.1	71397.8	71411.2	83655.4	91511.6	91040.3	128275	126361	138411	61982.4
O00560	214949	167984	225200	204715	172268	191667	203386	214976	179086	156323	195130	199138	111160	101618	103886	109756	125990	89620.1	142520	163609	120300	108262	124484	145973	157695	160997	187569	210565	163478	151266	231498	222790	165649	134980	192714	224714	124579	127077	136012	97169.6	145616	150697	136283	110169	164072	237287	182347	134904	89906.6
O00562	NA	NA	NA	9116.71	8612.36	NA	NA	NA	NA	61437	NA	NA	NA	12854.5	NA	10012.6	12125.2	NA	17190.2	NA	15920.9	NA	NA	22693.4	NA	NA	NA	13229.6	NA	NA	NA	NA	6767.01	NA	8294.61	NA	NA	8606.1	14135.6	18811.7	12081.5	9344.12	10654.8	9837.65	8122.82	31133.9	15041.9	10677.5	13714.7
O00566	88205.4	65737.2	101652	86710	78769.5	116799	93168.9	80642	128151	99509.1	142230	125431	67645.8	101505	90154.5	79684.9	85378.3	64245.9	106749	72164.7	87586.6	87082.7	78509.3	114178	53947	72416.2	90994	90901.7	55410.9	59599.5	77392.9	77733.7	45465.1	36237.1	62643	54988.4	41219.9	52291.9	95242.6	67160.5	56231.1	61011	76015	76556.8	70723.1	104640	109712	114232	56364.7
O00567	125748	118312	187003	139707	118653	170096	138820	147871	173472	140449	205538	229813	106025	163185	149221	138092	147212	130574	174877	182248	135372	145880	140594	169621	93304.9	114795	145740	137768	105131	111524	139922	130444	110044	102936	141047	149511	109958	113755	165022	116286	108829	115086	129040	133007	136453	199272	187924	192795	120517
O00571	184808	147374	217238	206393	165229	245894	204229	201796	224680	162176	257828	200699	147602	220487	198735	183178	180086	145027	226848	188961	183517	190738	165490	233389	131484	169229	205043	200787	129342	128841	177637	170335	127627	93417	165256	129431	132600	143072	199290	146106	149656	155049	174040	171080	183598	254081	239562	216393	127918
O00584	271100	169750	261107	270667	272253	340389	171829	174180	222998	128099	272662	271015	205966	367107	363955	300997	306636	155206	424811	256294	194422	177519	154543	314815	206874	212711	272626	267814	244369	143478	326620	278270	272479	121554	333290	109863	176910	211077	281308	202289	194365	230437	230206	243242	173017	399987	297270	255814	340420
O00625	70620.4	69854.6	86235.9	91745	91861.8	98781.9	93923.7	100142	73209.6	73459.7	140984	NA	NA	96568.9	91822.1	92415.8	NA	90260.5	114044	89921.1	88303.7	80321.1	91336	117316	48557.3	92856.9	78551.2	102486	57814.4	80512	85844.7	78859.3	51961.8	55878	82855.4	NA	49899.6	62505.9	138157	86950.2	68070.3	106391	105193	118552	86178.7	154918	137412	124125	76523.3
O00629	70937.8	59900.6	78054.6	74894.3	63886.7	83214.5	77078.7	71086.5	85476.9	65587.6	101031	67115	60721.8	70055.5	74208.4	70692.2	59954	60926.3	87061.1	80602.6	60655.1	63553.9	70872.5	68493.6	50235.3	44344.2	69081.2	75558.7	51681.6	47512.8	70041.4	69430.3	42650.9	26042.9	58037.6	50948.9	40949.9	56943.8	101472	65657	61410.4	67476.7	83414.3	75080.1	61781.8	120932	106325	97526.2	60047.3
O00635	26405.7	30433.3	NA	29067.7	25582.8	26189.6	NA	NA	30310.5	44434.5	35269.2	NA	24292.2	27749.5	35421.8	31906.5	33329.4	NA	38988.1	NA	48608.4	36433.6	34417.9	41734.5	18091.3	23251.1	28849.6	24225.1	25106.2	30682.3	34363.8	31210.8	25693.2	26930.1	33968.8	NA	17131.9	1100.88	NA	64159.7	NA	60760.1	65235.8	72213.6	NA	1085.48	NA	34195.7	26382.6
O00716	24293	NA	NA	35307.5	11632	54163.1	NA	NA	48173.4	NA	43393	NA	6757.67	NA	37854	26051.4	16275.7	NA	26487.6	NA	NA	NA	NA	NA	12802.3	21509.7	27027.9	34088.9	12100.2	NA	33685.5	NA	12851	NA	22875.8	NA	NA	13520.4	NA	NA	NA	NA	NA	NA	18536.5	NA	NA	NA	NA
O00743	87593.2	81174.8	93331.3	89612.2	86766	103161	59920.1	95193.2	97938	87379	108513	110810	60156.4	104493	93659.5	88126.6	93031.6	97977.2	97569.2	95977.1	57487.9	95367.3	95544.4	101433	64381	81668.4	83792.9	85802	68678.7	77951	90768.3	86660.4	71194.3	65020.2	72970.9	70526.9	110687	96605.4	114845	90295.4	98340.4	90629.1	110674	103851	102934	139234	132204	125546	96253.8
O00754	135181	107390	160778	134462	137735	195697	147992	138017	173843	130953	240895	208409	149487	231685	192446	177866	195026	171997	232129	220361	197067	203419	204051	260554	99865.4	122131	140131	140199	129422	125158	171538	172138	171098	130684	223405	224588	183153	212868	331709	202729	220398	250436	270064	254301	284693	524236	416044	348453	479498
O00762	50091.3	46118.7	59515.9	61165.2	62784.6	118146	103610	93153	69157.2	46370.3	74086.7	43823.2	39638.9	46118.2	30737.2	50054.5	31573.8	39897.3	70396.2	61945.8	82081	78561.4	74500.2	71493.9	35715.2	45805.5	59501.9	51423	27186.9	22954.8	34212.3	36989.8	NA	201178	NA	NA	50985	43179.1	96691.5	66298.6	83120	79434.5	93762.9	91635.8	129066	138116	123559	107965	46065.8
O00763	201528	160407	268652	222953	171189	243723	201133	217745	255373	194090	310609	266186	165243	261009	224744	204933	193050	154417	239663	186093	183906	187575	188710	286398	146187	201309	243725	221125	133145	139198	194255	184744	115892	98922.1	180251	154348	136931	156532	203994	147063	154108	151964	149684	171610	162986	232793	233217	236654	147848
O00764	68913.2	67116.6	103530	71158.5	61806.6	83727.8	88358.8	100881	78515.1	77996	95842.4	122659	43316.1	63939.7	54465.1	55813	52697.4	57183.5	62077.3	79890.1	54325.1	70273.8	52162.7	65945.5	47659.6	60808.3	69358.6	69840.2	54047.1	60348.3	75068.8	62679.6	54936.4	53720.2	63546.2	64968	72591.8	83514.7	111347	85858.3	86511.3	89993.3	101755	92152.4	90355.1	134153	135396	119784	70380.1
O00767	156599	119310	161090	152067	63129.2	111476	95794.5	108241	127945	159393	142772	132445	101111	154154	97465.1	106223	64666.2	NA	56259.2	NA	101010	99826.7	83054.8	159614	102884	148670	122201	136693	44476.3	NA	42404.7	33585.4	64717	NA	40731.6	NA	78915.2	78928.4	192659	73072.1	63659.1	45850.4	40508.7	55618.8	80258.2	103460	102796	111520	61858.3
O14497	39422.6	37488.3	59289.9	43985.2	37171.4	57759.3	58782.3	51561.5	54178.8	49259.8	67330.6	72018.7	39205.2	52853.1	48734.2	44830.2	48216.6	45833.9	54740.2	63511.3	49277.5	55249.5	50887.6	57166.5	28937	37294.8	42702.1	45593.3	30470.4	42272.8	43511	42578.8	28614.7	29860.4	39337.6	47672.9	40335.9	46898	72775.5	47398.3	42182.4	49217.6	58555	54708.8	59688.1	93970.5	90923.4	80476.7	51499.9
O14508	44392.5	27198.8	NA	59932.7	56439.7	62838.9	29613.5	NA	136744	NA	129224	NA	26183.7	74425.7	65885.3	61296.5	68320.9	12283.3	41590.2	NA	NA	38449.7	46370.1	58301.1	35466.9	49037	43752.4	68117.3	46730.4	19783.8	48546.9	43533	33748	NA	55577.1	NA	NA	11852.7	NA	NA	NA	2180.79	NA	NA	2536.27	NA	NA	NA	NA
O14519;O75956	19965.5	NA	NA	34171.5	11569.9	20510.7	11798	NA	9389.36	NA	44018.5	NA	NA	17851.8	33570.7	30113.9	11619.7	NA	41768.7	NA	NA	NA	19741	NA	16223.1	10375.8	48451	25539	14761.5	NA	54945.5	44712.4	13600.2	NA	41827.6	NA	26314.2	23094.1	NA	26449.1	18248.5	12556.2	22278.6	8057.6	34002.9	23193.9	24199.2	NA	20267.2
O14521	64416.5	NA	NA	95646.8	77125.6	116366	NA	NA	113387	NA	35969.9	NA	NA	108110	111512	91225.2	69676.8	NA	91796.9	NA	NA	NA	NA	97886.5	49803.3	65307.1	76529.3	95257.5	63175.1	NA	116522	105626	69485	NA	76527.8	NA	183599	111172	167823	132962	108341	128038	116576	154393	104789	166282	204797	191341	111895
O14526	89484.2	74144.4	83425.4	82328.4	79993.2	96184.3	85324.7	93303.5	94215.2	70897.9	122557	98802.3	79080.1	111430	99344.7	90385.2	97198.6	86800.9	130535	92675.2	91499.4	91433.2	91628.7	111661	65160.9	75641.8	92874.9	81447.8	72532.7	67917.5	91526.6	85720.2	63195.8	57514.4	90165.5	84919	72151.8	67068.5	90576	70521	75930.3	74809.8	79139.4	93880.6	67054.3	108703	102000	91342.4	76097
O14530	70402	71761.5	118352	84302.6	64973.6	101313	122878	91513.9	87451	72934.6	89598	58503.9	75119.6	76991.7	64876.7	63639.9	61056.4	51201.4	90961.4	180066	90982.7	89514.9	104318	78407.3	49284.3	54705.7	76438.6	80075.7	43088.8	60652.5	64290.8	60430.4	33529.9	23855.2	50931.9	39034.7	41979.2	49045.4	87254.8	60299.4	59871.9	63710.2	74998.7	74992.3	75618.2	122544	102450	90620.3	59505.4
O14545	13502.7	10174.2	NA	14594.6	9633.67	19241.7	7711.29	11058	11716.2	9774.01	21267.6	NA	12952.8	21919.8	18499.1	17018.3	19682.4	5431.93	20560.9	NA	11057	13975.8	16214.1	20231.5	8313.33	10912.8	14786.7	12558.3	9754.82	11709.5	14510.7	13398.4	10311.3	5837.69	12073.6	NA	11119.9	10516.8	12158.8	13574.8	12466.3	15910.2	15387.3	14819.7	16973.8	24842	20381.5	16623.9	12932.4
O14548	120587	94708	128709	114265	108137	154387	118044	103918	153578	100291	146692	109109	75375.2	126083	104165	103662	114631	93102	122586	113090	108274	101683	91879.4	130841	84797.1	109815	113284	119720	91728.3	82873.6	120429	113994	92134.8	76267	116838	94789.5	119337	100081	128875	91769.8	98963.9	95441	99569.2	116080	116030	168036	130674	142424	111343
O14561	251110	219563	194399	223069	223511	391154	134882	252793	249076	288759	316301	131211	121106	277860	237375	202637	261116	104969	273492	269852	99411	175083	343018	198800	159366	194259	200683	200025	210238	112486	228101	233940	222780	166809	203219	209986	213981	171415	354327	218644	194127	201578	218248	224233	176090	460913	312873	399823	292180
O14562	63376.4	36104.8	91020.3	75460.2	64991.1	98758.2	59344.2	78356.9	91151.8	42417.3	106830	153170	40059	74902.4	65384.7	57675	71068.3	41518	72082.1	118058	43630.1	72292.6	81563.2	82036.7	47240.4	58027	63528.7	62898.9	42829.1	56990.8	58164.6	58875.8	42129.8	32395.6	49445.8	69828.9	37760.9	53122.8	90231.7	46605.4	47335.1	59966.7	60875.8	63075.8	68459.8	93033.4	101897	80970.8	67506.5
O14579	142136	110651	152687	127641	119009	145297	135232	127508	137363	111274	164199	136969	103911	142641	128709	115861	131867	112897	148744	137831	123286	129216	124187	152118	92951.6	111852	126774	121433	95873.5	91438	120015	119307	80599.6	81083.4	108513	117795	81807.2	102106	139562	104782	103364	110783	124068	133075	125835	180735	165853	144868	98911.2
O14593	11469.6	NA	NA	14594.4	9900.44	20524.4	NA	NA	23342	NA	18857.9	NA	11831.6	24812.7	30396.5	17572.1	23957.6	NA	25731.9	NA	27952	NA	NA	20662.2	7825.98	12447	13866.8	11427.3	10823.7	NA	17743.8	12357.3	13210.4	NA	17749.1	NA	9528.81	19361.9	43847.2	21688	28748.3	31542	31587	32255.7	20127.4	36016.6	29753.2	27386.9	23789.7
O14602	154368	115337	184082	204039	178058	228377	137265	135921	223947	103824	267460	196745	131299	188090	169164	171931	175677	96412.7	176816	163921	113369	87772.1	97076.7	214763	130581	174258	164691	197535	138139	92834.9	170412	159039	118928	63221.7	125463	63728.2	137925	124993	181472	138864	116509	136779	164481	159555	165414	194166	218561	228172	123719
O14617	85140.2	75139.5	100677	98240.6	82853.2	112213	98903.2	89861.8	108332	92134	138902	114884	86096.8	117231	110928	110182	99303.9	80834.7	131229	109142	100782	109267	99031.9	129551	63286.9	78539.3	91366.8	97694.1	72239.7	75515.6	102214	99155.1	72475.8	58811.6	96276.5	93173.8	70781.7	86970.4	124886	89139.3	83955.2	90971.5	103983	106926	103380	161561	151554	139932	91015.8
O14618	112441	119675	213479	124239	100446	137161	156517	169314	124329	133628	160055	191917	130393	171398	172531	158583	140092	193229	206981	217511	174985	163855	147334	158787	79429.1	110101	122453	125557	102867	133716	144703	142701	130043	131868	156141	234216	182919	215747	262787	191500	201439	227058	231138	218277	195573	338194	268495	214645	250576
O14641	18898	42082.6	189439	27237.9	64021.1	NA	117889	145042	NA	NA	NA	NA	NA	27669.7	21756.4	22076.1	24024.9	NA	31627.2	121962	NA	NA	NA	36798.9	NA	23583.2	26669.8	28813.7	NA	NA	21484.3	NA	NA	NA	NA	57832.5	46554.7	2004.08	NA	1969.27	NA	NA	1850.58	NA	3567.27	1888.27	2663.66	NA	2725.65
O14646	57744.1	50156.9	61880.9	62216.8	48836	77133.9	58221.4	56330.3	70578	54246.7	93286.5	61072	33443.1	62811	59887.5	53842.8	49758.9	46850.3	68523.2	58941	40488.4	48325.4	58412.5	69154	38403.1	49135.9	59319.7	63017	35729.1	37612.9	57453.1	55061.1	33918.8	26300.7	46073.9	34642.9	37587.5	46804.1	76024	51228.8	50971.7	50720	56080.2	60934.1	64243.3	90000.2	94455.3	89721.8	44213
O14647	41923.9	21503.4	45141.6	37694.7	24874.9	43706.3	28368.9	25385.1	50295.1	35023.1	56027.9	51989.4	23605.1	41302.9	39047.8	39780.3	26123.8	27164.6	42146.6	30332.7	25589.5	31384.7	26651.7	48902.5	21413	26450.3	43696	38495.6	26646.3	29664.9	38098.1	37340.2	21767.8	23664.9	32786.8	43166.6	27290.7	6949.75	9421.92	24455.9	23792.7	22626.1	23731.6	22957.8	19442.1	41419.3	37117.3	28914.2	19410.9
O14653	50152.6	124980	292486	56786.3	52620.2	76266.1	NA	149147	78090	159039	107298	242525	126611	75018	55736.5	65450.9	67122.3	123456	74598.2	81959.6	169438	177460	147657	84005.3	39822.9	51306.9	52435.4	52408.2	46949.9	115747	55970.7	58532.1	43517.5	NA	NA	NA	41424.5	34730.6	41676.6	51748.4	55202.6	66880.7	60426.2	62007	57107.2	103999	105127	94734.6	60696.4
O14656	100528	93654.2	135731	122846	98050.8	128554	125416	122793	123564	98159.3	155206	141938	84126.9	122787	119002	120302	109220	103728	150863	133557	100613	123867	125783	146010	74724.2	97472	112235	118235	83649.6	95355.3	125864	122904	92714.6	68952.2	115785	112191	61637	81168.4	129144	81121.4	82600.6	90370.1	101685	99299	106569	161006	164086	129185	87159.3
O14657	101349	66053.8	86754.9	106336	103969	149302	93379.7	92569	138626	66455.3	144074	106551	80912.7	118845	100666	100766	119652	72571.5	132217	87731.6	84050.3	81990.3	77249	127869	67342.6	92072.7	106904	105166	85371.5	69684.7	116559	119561	92402.4	56117.6	109339	87441.6	84862	81105.8	106495	58162.5	97280.9	96885.7	88117.9	102014	103274	159758	117747	87396.6	73929.6
O14662	75975.3	58851.3	111615	122217	81207.6	120429	68089.2	94753.7	101678	67629.2	134307	108224	88074.6	95114.7	117902	120242	88428.6	77828.8	127636	84435.4	77178.8	83248.4	93831	123299	52959.6	76298.7	140584	101217	71019.5	42120.9	105529	107598	56957.9	30543	94699.2	66904.4	58548.1	80293.8	133568	95375.8	88079.7	105156	101740	116849	98242.5	171474	153727	156109	103123
O14672	31976.1	31724.2	64302.6	34074.3	31056.5	41845.6	45265.9	43032.4	36740.3	36851.2	47281.3	65417.6	28000.6	40307.4	33558.4	28795.5	36708.1	30361.5	40169.8	44665.7	45492.3	32061	33647.3	34830.5	22048.8	28012.9	33885.5	35408.6	26696.1	30087.6	31071.6	35020.7	28257.6	21982.2	30817.9	39579.4	49003	45645.5	62024.9	40985.7	44356.7	50566.3	49764.2	41993.3	50339.2	76723.7	66358.7	56963.4	39293.5
O14681	133636	99112.5	202205	158201	116451	167645	183984	135692	170457	126944	203129	162753	90907.6	160121	139619	139266	122516	106129	145772	160294	159646	123789	127581	159228	88857.8	103685	131892	140941	83864.8	87063.9	152126	135012	83734.6	NA	108073	NA	82454.9	34274.3	64371.2	107504	99148.3	133577	135440	125439	134455	193156	204564	160491	112228
O14686	10148	10008.4	13147.3	11439	9613.24	13028.7	NA	NA	18426.5	10382	16357.1	NA	9423.2	10205.2	10059.1	6957.17	10907.6	7032.56	9922.23	NA	NA	9656.69	NA	13571.4	7154.08	8130.31	9957.58	10924.7	7394.61	9103.31	8459.83	10454.9	5489.15	NA	4946.97	NA	10173	6686.81	13433.2	7932.6	5709.66	10094.3	11115.9	10961.4	14260.7	22519.7	18677	17037.6	10327
O14727	120761	108464	149063	135681	113369	153683	149201	113359	141608	108850	174109	118716	109846	140000	140294	127093	131344	113137	147473	145017	115996	138134	96111.5	177220	95390.8	105351	135383	139917	99988.5	104027	128425	131791	97346.8	83762.9	126153	110435	70915.4	91307.1	132423	84391.1	76799.2	98444.4	98447.3	102826	95458.7	169120	145290	112511	72201.5
O14732	150118	165175	NA	150329	161884	190664	226024	251681	153522	181198	237622	254159	162468	158156	168204	154997	160374	152752	195689	287832	195888	181400	188495	191807	106816	115917	158776	158270	116341	147235	166545	166850	114242	111651	156809	NA	204483	253279	398398	296617	266802	289621	360131	381620	327683	518277	531806	484009	208489
O14733	46493.1	37143	20075	49893.2	50852.2	73766	64295.1	47649.9	66539	50360.2	87256.6	34619.8	23607.4	62773.2	51602.6	48936	54249.7	48949.4	64635.2	13612.8	40591.7	62818	52689.7	73220.5	28531.1	44578.4	54780.6	55703.6	34122.7	36154.7	54493.6	45385.4	36358.3	NA	42203.8	NA	44073.8	79537.4	116337	51594.7	54521.2	57401.1	65928.8	65277.1	78082.6	109103	111243	96394.8	58759.1
O14734	99766.1	88808.6	160867	148423	95124.5	136454	103859	125207	117021	130313	194551	165128	103236	163483	170338	162265	134029	132534	199652	151613	129597	151759	156913	192815	82594.4	95938.8	131336	133150	96764.9	106130	144977	133464	114055	86100.1	145615	152451	86295.3	100948	142476	107755	95849.2	110926	131023	132106	106812	191382	195433	158435	118842
O14735	68042.5	93769.2	101457	74360.8	77998.5	110944	68645.9	51843.1	108662	90473.1	120379	93109	132803	110839	88947.3	77415.8	107870	73138.3	113957	53057	108005	55994.7	76156	94580.2	58037.3	83311.6	68212	78312.6	72030.8	71588.1	90500	77689.6	84577.9	58950.7	86284.7	85657.8	69433	65776.9	116868	72023.1	83702.1	91776.9	85250.5	105455	108173	185012	140513	136275	95215.3
O14737	128472	91769.6	160502	140581	120154	170032	154351	154164	200530	145637	225162	193295	96499.6	144504	137043	131172	116496	104978	162247	137604	119606	148891	135052	175255	89065.6	120634	138759	136772	82556.1	90633.8	134169	111304	62132.1	64796	103586	92403	79656.9	93880.5	139740	102168	101199	98278.2	123566	117207	145604	180679	175628	184568	120397
O14744	138275	113318	155307	156743	130571	189414	151198	148910	193990	142641	222222	182615	115798	175114	165291	149445	147161	133475	181296	166735	134619	157669	151980	186369	102253	125264	152031	151671	100820	110482	155570	149344	99558.5	89132.1	132756	113519	96675.9	113040	179759	122320	113528	127460	142260	153822	142611	219023	223299	221417	119632
O14745	93486.6	87520.2	118653	119329	88211.1	128397	99490	103527	118549	103620	147662	173394	80755.7	126007	106742	111561	99576.6	92584.9	111800	95522.8	92021.4	114289	96700.3	132436	68523.1	93918.4	110729	111716	73404.4	91262	104295	99241.3	67644.8	61309.4	93048.6	85918.1	135467	174027	214850	166696	125458	174837	187008	189480	169219	213420	250247	227315	128756
O14757	52597.7	57560	66530.3	63970.3	65659.2	106211	117174	112792	91778.4	115751	102248	NA	39733.2	NA	36849.7	56155.8	43643.7	86892.7	77337.3	NA	96221.1	105588	86182.1	80154.2	44644.7	NA	48461.3	68151.3	NA	36289.4	29705.8	30999.1	31660	NA	31973.9	NA	25728	16123.8	41464.1	25265.3	45227.6	50352.1	65235	69748.1	82385.5	100526	106085	110178	38583.7
O14763	NA	58806.1	NA	88543.4	NA	73369.4	81984.9	NA	NA	78905.7	86311.7	96995.4	48338.8	76432	87411	88791.7	NA	NA	93474.6	NA	NA	NA	NA	87535.2	NA	78008.8	85523.1	79440.6	51556.8	NA	83657.4	78228.3	53424.9	NA	84219.3	NA	99988.2	57933.5	99197	67317	70463.2	74322.8	70363.9	66713.6	92281.3	136521	139558	137143	90369.9
O14772	45744.4	27520.8	NA	NA	NA	59075.8	NA	NA	NA	45464.7	60231.6	63613.5	NA	45795.9	NA	NA	NA	37986.8	54753.7	42661.6	39031.1	NA	NA	72467.5	NA	NA	NA	NA	27101.3	NA	NA	NA	47287.5	NA	NA	NA	NA	41513.1	75854.8	39260.7	40375	50637.7	45510.6	67542.8	38910.5	75669.8	NA	71083.8	46147.3
O14773	112870	93020.7	135674	137279	132525	186274	117251	104111	125345	104511	166971	122632	120545	211950	171120	156275	194646	154708	211147	123929	148015	156519	120547	204486	91537.1	107969	129531	138022	127192	94973.4	172535	141279	146892	91240.5	167952	129317	155585	187925	269740	174197	170818	220494	201381	204833	190756	371999	311169	236267	202593
O14776	77626.1	69341.6	113353	92869.4	70138.3	103817	100257	100597	99447.1	87548.7	122497	114041	64485.1	92892.2	89530.6	88472	80484.3	74413.2	101546	95609.9	79387	100440	103332	109863	56130.2	70027.3	93888.9	92859.9	60144.2	71134.3	91922.1	85420.6	58884.9	57392.5	85368.9	79338.4	62437.6	69555.1	99873.9	71372.2	64126.7	70885.4	82753.5	80043.8	84282.4	113637	122410	108589	66327.2
O14777	81415.2	63882.8	NA	97285.3	73844.3	119931	110049	105202	88438.8	81070.8	128834	95838.5	58215	77940.3	76405.3	85119.6	58507.9	56989.9	106466	91573.8	76484.3	85239	86140	115976	44675.9	69047	75952.6	98540.6	44956.8	52101	83475.5	76357.9	NA	NA	NA	NA	47715.4	68752.5	95988.6	70849.7	68981.9	66581.4	79566.6	75696	88796.8	123764	143513	128784	66610.9
O14787	74390.7	65180.7	91008.3	88538.5	70943	102451	82572.3	72617.7	102274	96101	117025	95194.9	70277.3	87018.4	87071	91004.8	76506.2	77476.8	91143	87535	75143.8	94739.9	86624.2	98653.7	52813.2	56968.6	73202.5	91393.8	59632.3	56644.4	85603.2	87388.1	62561.6	46044.7	73788.3	60288.6	41833.3	58002	95557.2	65382.7	59360.5	64271.5	73600.3	75919.1	69154.8	116296	109775	114547	55832.1
O14802	62507.4	63226.8	81219.8	69205.9	58363.4	82423.8	79077.5	78206.8	71527.7	69067.6	91051.9	85754.3	65109.9	68380.2	67647.4	62030.3	64864	60440.1	80453.8	69279.8	53921.8	70842.4	67568.6	73149.5	32872.6	45965.4	72746.8	62001.2	47419.5	57312.8	63496.6	75941.1	45049.4	45235.2	48534.7	54141.2	26503.7	37312.4	60815.3	41322.1	42370	48581	49998.5	52243.6	45538.6	84532.3	105724	75543.7	47409.5
O14818	329379	237131	363863	357064	287239	414631	344414	330454	428190	304601	554168	412167	263049	409150	364490	346679	338365	276306	431325	335409	298554	334500	319697	477208	229604	292987	363694	372290	258620	260546	377017	374373	232496	192463	339747	279586	215923	256483	399918	291213	254104	288130	328417	344566	331759	514736	524470	505861	278937
O14828	148164	109783	146605	139151	123953	163334	147517	149518	185688	132336	205997	174357	130017	174576	156321	140431	148232	127428	179152	156003	142833	155694	127658	203450	99292.1	111550	137639	142035	105087	100329	142262	134786	90653.2	75376.4	123303	127097	107589	139926	204059	136677	145043	151920	170555	159922	168610	251935	260598	218471	164028
O14832	NA	NA	NA	40993.7	94149.4	148493	NA	NA	NA	NA	75626.5	NA	NA	NA	NA	45982.7	NA	NA	62538	97297	NA	91841.8	NA	82214.6	NA	52882.3	51791	30520.3	NA	52615.2	82802	NA	NA	NA	54080.5	NA	83658.8	55479.1	96334.2	121943	67921.8	93475.8	62463.2	72228.5	102933	233367	161647	139902	122693
O14841	82238.7	81405.2	127071	98296.4	81988.7	104181	123541	112843	82537.4	97161.8	127801	145388	92494.1	132633	131065	128143	117554	125225	160293	151144	116284	131239	132532	148603	56781.4	75032.9	100645	99957.3	73795.1	88045.2	106982	96765.7	81100.1	75901.8	110693	130222	63353.1	78084.2	99663.7	67198.9	81864.5	88152.3	90882.6	87017.3	75832.5	134044	116632	100995	82160.3
O14874	48217.9	48371.6	59759	47443	45974.2	62535.5	55317.9	48100.1	56038	52809.9	68186.8	70934.3	44519.6	55270.2	41147.9	50004.7	53000.5	53323.2	58466.6	52512.4	63818.1	61766.2	66754.1	63263.7	32009.9	35708.1	39142.4	39550.8	30035.7	47198.6	43291.8	44837.2	37946.3	28907.2	47359	46007.6	31776.7	36971.3	53397.4	32406	40723.7	47928.1	47414.8	49114.6	52495.2	99435.9	74445.3	76882.6	42355
O14880	158935	91544.6	176948	138087	144804	146247	117644	130489	120109	123375	155080	115437	70772.5	111393	116080	95436.5	116905	100001	132529	123005	86242.3	114988	104272	105993	102114	106978	114086	131919	147010	90787.9	131507	143325	146564	85327.5	148757	158934	102202	116198	135775	106516	127415	122396	126011	123480	107648	153325	148886	117264	131473
O14893	63174.2	63802.1	238738	72779.3	65325.7	95119	87141.2	208459	95483.5	102419	135538	434550	72804.4	90406.8	85118.4	78848.7	NA	98241.4	117143	153767	102562	138629	132121	107805	46907.4	51735.4	74715.8	71375.4	53155.3	84833.9	51085	59616.2	46112.9	65685.6	48354.5	149638	46320.8	66744.8	117738	53332.9	56815.8	96679.1	46394	89408.9	75482.8	115172	101959	168777	63402.8
O14907	88499.6	75869.7	132077	91556.7	106763	179268	136975	121136	95342	98023	164471	141935	74077.3	194114	98115.8	99866.1	123183	87555.2	69360.1	167429	93919.4	98394.5	113365	108620	34123.5	145808	100500	79448.3	77581.2	83004.5	94533.2	53579.9	83279.1	85609.3	82766.8	145770	112611	152457	211998	141790	185600	180370	210754	201287	204593	270188	272290	231381	171226
O14908	NA	NA	NA	25174.5	24999.7	45358.7	NA	NA	39088.6	NA	56052.1	NA	31357	46086.2	41216.8	27662.2	30408.9	NA	41150.9	NA	32151.7	104012	48497.2	47155.7	15319.7	22239.2	NA	22466.4	26202.4	NA	34406.6	32539.2	NA	56220.5	30782	132951	33111.3	34877.2	59280.9	39422.2	46368.7	47180	53346.7	49984.1	63335.5	85550.5	84860.2	79342.9	55963.2
O14910	47933.2	80275.1	127345	81449.5	43652.4	73449.5	116149	119552	77582.5	75071.9	119785	177962	62314.4	47497.7	57672.2	84561.2	38956.8	108393	72562.5	NA	64039.6	71589.8	76724.8	72985.4	34586.6	45385.9	69410	70356.9	42102.2	54029.7	67249.4	49585.1	36318.7	35139.8	46875.4	NA	29909.1	32250.7	58207.4	45996.9	37811	49963.3	58478.9	52264.7	NA	115464	87102.2	71172.2	NA
O14920	89689.2	86203.5	133037	102941	83521.5	123307	109860	112424	117616	103174	143140	130057	97111.4	131573	119819	108372	109538	107027	135455	127749	120910	124209	113394	144134	63574.5	81754	103513	107962	73497.1	88714.1	104505	105419	82693.9	73956.4	105677	115345	58055.1	61339.7	100368	60193.1	66319.3	70266.5	71853.9	71566.5	71132	126307	112723	98278.4	66582.8
O14925	273551	181725	341421	262092	263627	334270	271948	289434	326803	274502	395814	309941	196861	309746	276663	265168	251444	226484	365810	299537	261136	250094	229686	361742	178026	231765	252810	273504	194510	183242	275078	260799	186375	120862	219450	197976	190208	230438	337737	211783	289588	278744	264033	309874	313696	416221	382367	372487	253577
O14929	110875	111189	175499	108724	105205	148474	131891	132491	138563	137486	161353	141791	91737.1	110261	90729.6	94571.3	89502.5	92547.8	105137	109542	119665	126448	94138.2	134337	79488.7	92196.6	112718	118427	76732.8	83039	102698	102443	60759.6	47826.6	73510	70866.9	72001.6	95718.9	134585	109087	80691.8	109191	126604	104194	126576	153659	171495	169972	68397.2
O14949	195136	125106	213402	237503	201382	253515	197868	148584	235863	170939	335564	248156	170044	294019	289754	239792	262858	201032	325942	199544	199430	244221	204806	295882	151067	180677	229544	228786	194487	156853	288375	264576	248842	148278	322289	208608	195842	165299	197596	156230	194487	173945	189433	167985	185223	273596	269418	223387	242928
O14950;P19105	391925	225668	377518	426184	379196	483248	336096	285690	472176	203478	636917	297367	226397	566278	505879	461906	475327	297533	557914	307716	304779	407387	304179	582187	283364	351542	397683	429886	320122	244640	440386	437176	318621	143151	432695	319759	292310	360869	593387	348822	363562	417315	481264	429586	455022	734673	663842	583537	362953
O14964	69097.7	74605	91707	66139.8	67716	82326	86413.3	86192.3	88552.7	83001.4	90743	108293	69025.9	88048.9	76179.2	73446.1	74186.9	90174.4	86902.6	99769.5	75578.7	81572.3	80774.2	76460.6	49636.5	62893.5	69595.4	72718	55711.4	67613.8	76051.1	71880.4	53570.6	74241.9	73321.1	75297.9	63244.7	70379.5	83996.6	67058.6	67911.8	67120.4	77677.2	71389	72685.2	100652	102294	81011.9	69188.7
O14965	85405.7	69172.7	136782	72919.4	72044.5	146089	189722	159794	88961.7	85330.7	164389	NA	59424.8	73851.9	NA	132548	78859.5	NA	162044	140292	90462.9	125473	132221	99707.3	46361.2	81502.9	137760	70475.2	36852.5	81152.2	NA	87633.1	49787.7	NA	101207	NA	35545.5	47444.8	122051	60964.7	78838	98353.2	112815	106217	151523	227016	162689	160908	52780.6
O14966	174471	NA	245054	161275	157891	184733	220685	NA	171540	225465	216511	217337	151382	173896	169683	153564	184748	215703	200323	296099	193748	230361	166473	177091	97456.8	127167	134122	154526	160561	182530	179604	152169	135491	NA	153586	NA	NA	51222.2	105581	91328.6	90755.2	99503	93039.3	144080	104345	139348	146425	126697	NA
O14972	44847.2	46222.8	49071.3	46060.5	48731	58541.2	49945.2	62555.9	50765.5	47262.1	71552.8	58966.1	35777.5	59846.7	52060.2	45897.6	54697.1	46204.5	69794.2	49396.9	51800	44092	43488.5	58229.9	29654.4	35513.9	45387.9	47135.9	45048.4	44417.8	58639.8	56096.3	51139.2	38497.8	64204.8	49558.5	34593.7	38402.7	62255.3	41055.5	49205.7	50374.4	48442.5	51831.3	46554.8	92021.7	69238.6	59908.5	54289.3
O14974	50253.3	52027.9	77448.7	61848.4	46872.4	73698.8	55951.5	67521.1	62621.6	51431.1	75017.9	117403	44398.9	63636.7	62413.5	63600.3	52251.7	49754.1	75804	71198.9	57672.1	62173.4	70519.5	70839.4	34874.9	48338	61118.9	61978.7	38030.1	46913.8	60203.4	53457.3	30538.4	34063.9	48567.8	55107.1	52062.2	58172.8	72979.2	57879.6	50105.1	55044.1	66175.2	59481.2	63389.4	94778	83183.7	75254.3	51799.5
O14975	143554	141681	195115	150837	159398	229578	207644	184690	171436	146818	236240	199730	130911	205305	195256	183974	191153	132002	216670	175811	134768	171661	182584	238492	117089	144200	154427	148129	113498	121148	164629	168079	125812	109821	152833	170118	32012.4	83121.1	113865	105931	75605.8	70666.3	89222.2	97913.9	108463	193241	127784	161700	61565.7
O14976	125628	132525	165624	138012	117757	161118	189243	163023	149480	142563	169051	174673	111027	169943	146175	141073	137117	148691	159177	162268	151225	166730	132062	168230	88135.5	113418	129029	137236	101404	119370	136811	137372	108017	96322.5	123715	143418	88710.2	102199	156556	105000	114281	116898	128041	132523	121392	197038	170508	166687	102711
O14979	318116	259013	411188	360628	310802	464514	384858	367307	470443	325534	548495	456579	260752	435839	356622	358048	352521	313751	426951	327424	327332	381600	328257	441091	229437	328138	392422	376377	241397	249477	352376	335909	190756	160939	266241	234888	162086	246677	406168	264488	257599	286991	304081	317168	324537	513683	505988	513805	251602
O14980	152538	125036	191646	163132	133200	198860	173896	166989	206868	164081	236125	194343	122133	170245	158656	150473	144520	116775	180498	172354	148709	161407	150915	195133	104172	129745	146911	162570	120200	114065	157973	156452	113907	94262.7	144130	147476	103815	127075	190943	129454	135986	137760	152533	157750	158407	236753	236362	240843	129702
O14981	72600.5	59839.7	103736	77721.1	63489.3	93688.2	89309.4	90512.7	92787.1	73016.3	110774	101398	64559.3	92190	85991.6	83626.3	82466.4	75086.2	98263	106031	78529.7	83474.6	90589.1	102543	48989.3	63415.9	73722.4	80346.3	50850.5	60250.1	71513	70130.4	50453	48969.3	65428.4	76912.3	52353.3	58795.6	93809	60054.6	60231	62351.3	72735.2	75612.5	75655.3	113844	114510	105848	58447.9
O15027	82961.6	76764.6	128669	95077.8	78955.3	117642	122681	114796	116258	96305.2	130452	150048	86167.3	115743	103891	95552.1	102932	101260	118155	142567	103335	127257	109044	123752	60973.9	77114	89184.3	92066.5	63546.7	81570.6	91502.8	93887.9	56927.7	53228.6	80722.3	90943.3	61313.4	74454.2	120542	75208.5	70138.2	86033	97300.6	92922.3	102652	147868	136023	119383	83855.7
O15031	52573.6	47408.5	65193	59120.3	49359.4	68574.5	62620.7	57744.5	67474.3	59922.3	79753.1	84233	54633.2	69204.3	62505	56595.9	64713.3	67306.4	71917.3	71935.1	60750.4	71372.8	64709.8	69540	36389.4	47857.8	55445.6	58065.3	47871.6	60532.4	63046.6	60999.5	50945.8	48062.3	61614.4	59559.3	56299.1	55174.8	89494.6	57688.4	59461.1	64647.4	69085.3	65158	70628.6	117610	107838	95243.9	56541.7
O15037	NA	NA	NA	38121.9	NA	84485.4	NA	NA	NA	NA	NA	NA	NA	NA	50984.1	NA	NA	NA	47343.1	NA	NA	NA	NA	43932.1	NA	27779.1	NA	31018.6	NA	NA	45740.4	38631.3	31524	NA	NA	NA	NA	23210	52614.6	26114.9	30982.6	36889.1	39221.7	35965.4	32857.4	61653.9	73214.4	63530.3	37068.8
O15042	72163	65400.6	100182	77754.2	63793.1	102483	84170.5	85248.7	95244.8	78020.6	116847	100097	67736.8	90142.2	88503.6	82166.3	73973	63819.2	93660.6	90571.9	79243.6	90950.8	82501.9	104602	50003.3	67663.1	78791.4	82025.3	50566	62880.8	77733.9	74479.8	42397.8	39525.1	62590.7	60900.4	56007.3	67129.4	100990	71895.9	62501.9	73275.5	81317.3	80782.9	85250.2	123234	124943	117931	67046.1
O15047	27177.4	16350.3	24102.2	29426.2	21884.8	42549.5	27194.3	37935.8	39055.5	26431.8	45825.5	30928.6	18696.9	34020.8	28906.2	24846.2	26144.6	25637.5	32428.5	43710	24138.9	30484.7	28633.7	38151.1	15816.9	22553.3	24585.8	26003	20469	21609.4	27093.7	22354	22186.6	13498	23652.8	14825.5	27957.9	25677.7	42245.8	19684.7	23149.9	24094.3	26916.5	27068.9	33470.3	52432.8	57766.5	44150.8	21086.2
O15067	171331	146953	219049	192663	157331	234287	209106	178797	229741	174624	270203	225647	132580	186663	171691	168292	164072	138046	198517	162807	161922	183313	161592	206917	124261	154580	185480	188151	126511	129397	184280	170698	111867	97951.1	149608	135387	86991	115244	180955	131745	113485	125465	148960	153163	162927	231736	236835	258899	112836
O15084	66294.1	30637.4	82738.7	68412.7	56200.8	69376.9	64000.4	63588.8	70256.5	59522.2	102998	88420	36983.8	68985.9	58764.5	53049.7	53454.8	NA	82582.8	79081.4	44913.7	71276.3	77937.9	84529.9	41371.3	54557.8	66285.2	69025.6	47077.7	41266	62551.1	64303.2	42611.7	26858.9	55660.2	59217	61145.8	49005.6	64777.5	41069.3	53016.4	50009.1	50910.2	53842.2	49046.3	77819.8	59830.9	55866.3	56446.6
O15091	89724.8	51397	93769.2	82120.3	80920.8	116271	90744.6	104481	125693	70784.3	145037	62536.8	51705.4	93816.9	89141.9	79527.9	77249	67997	115654	74373.9	62498.6	77306.9	79084.7	127784	57202.9	72867.5	88142.9	79354.7	63119.1	52306.2	71583.1	89571.5	46540.4	11786.7	68600.3	67423.6	38091.4	42105.8	80301.2	44538.3	54643.5	59241.6	68079.4	75549.6	66892	115336	106933	101822	60818.9
O15111	31263.6	25275.7	54814	49423.1	31266.7	55596.5	42337.4	44286.6	47289.8	40357.8	83368.9	55913.9	32110.4	63049.3	68287.9	58747.1	41354.9	24904.6	78491.3	53727.4	33807.3	43269.9	46296.3	76783.5	21246	30315.9	46222.8	49612.8	21729.6	24340.1	45877	44922.9	33149.1	19865.2	45625	36365.2	44765.9	40723.6	61659.4	39673.4	43130.4	44100.8	53173	48085.1	50060.1	81024.8	79943.3	64062.4	45192.8
O15116	231187	179338	244452	254723	227467	338749	255517	259058	315827	228444	389897	267806	194241	319084	273327	256551	284371	196277	312740	235494	253623	299153	238847	347675	162918	215659	262400	247353	203810	190821	239454	250521	182107	161035	238644	236314	121804	168017	267571	157129	178824	210844	195445	199706	234617	355547	316956	306926	209459
O15117	22148.9	24425.7	31733.6	20533.2	23607.7	29753.8	35627.9	36259.1	NA	26944.7	42792.7	NA	14465.3	28731.1	21607.1	19196.9	25430.2	27447.6	31296.7	NA	40040	32394.9	24006.1	26623.8	12463.3	18951.8	18563	20679.3	20549.2	17815.9	24608.3	24842.9	23773.2	22908.1	28628.2	30239.1	24397.5	26148	43818.9	24596.3	22768.2	27064.2	31694.5	31462.5	26390.9	55089	43598.7	34355	35370.8
O15118	36727.5	NA	33740.9	35283.2	32396.8	40927.5	50921.9	NA	43626.4	46883	58224.4	40000.1	32113.4	45398.4	40601.6	39620.5	43450.7	36456.3	46745.4	30958.6	44348.4	38208.1	47364.7	53907.5	25524.7	24761.8	34867.6	38472.9	33443.5	31041.7	43945.4	35065.1	37294.6	28613.6	47145.9	55891.1	30832.1	34641.7	53697.7	28288.7	34420	30613.6	32491	34341.9	43577.3	74984.1	54242.4	51974.5	52171.5
O15121	92656.6	91715.9	149811	114470	103091	124984	129388	214439	79924.4	113543	151672	127339	64629.6	101276	100753	99449.1	82186.9	127093	117026	200220	163509	81051.9	173589	130389	61449.1	79713.5	109619	111831	74616.9	100853	108671	106746	82381.1	72558.2	97054.7	135730	26959.3	70870.3	118427	73134.5	75014.8	81953.7	94868.7	95888.1	89034.3	154120	121171	108396	76000.4
O15126	77036.1	69626.8	93676.9	89884	65113.9	116612	81235.8	108981	99655.4	80214	135844	112953	66827.1	84261.1	70157.9	66007.4	67290.3	71602	71309.8	99571.4	83197.6	79315.5	88918.8	95374.7	50307.9	72816.1	82075.9	91517.1	52112.9	72116.1	85388.1	87342.1	56733.3	65231.1	74096.2	54402.7	54949.7	67597.1	96477	59348.2	62166.9	66124.5	72825.5	72297.2	85345	131651	118172	107703	61161
O15127	93469.4	85690.8	128902	113576	90684.7	120708	131920	122021	112247	100660	151600	188832	102570	130550	121415	112733	109539	105065	127718	140576	112546	139068	108744	128053	65470.4	78801	113409	108470	84174.5	99541.9	112693	109826	79905.6	76936.8	120539	133258	98918.9	101046	140938	94242.2	88537.1	108284	117894	98607	105450	168868	156842	137880	98466.2
O15143	248503	159668	198483	241968	237814	301683	133018	179852	263080	157829	330778	181334	153264	329798	242227	229098	302960	156991	286739	242485	147386	179984	199170	289274	177744	235640	244430	238778	221339	98717.6	273240	276471	227874	144311	245712	192180	244205	261859	362838	252565	247414	270901	297899	292198	264175	421205	383018	335677	258274
O15144	176369	143312	229963	184308	161449	222214	202829	188009	206701	172469	266633	225156	150038	199744	184435	177546	187120	147512	217095	206612	169312	183987	162916	211634	121479	142701	179985	184909	142237	152773	196214	198147	142891	122334	194003	188994	149283	153473	238969	159536	142418	176380	192303	190347	183428	297483	272130	239104	156841
O15145	131515	114336	170526	155793	123831	188961	134557	136091	170696	133240	230961	188904	100947	179079	171964	146831	145592	159220	191640	122141	122855	159199	142839	184826	101005	122440	154487	153555	111386	125605	164066	159858	120274	96657.8	170445	112575	112258	146990	210180	141162	134417	156064	168050	161419	177021	271196	238419	225949	152759
O15155	82375	59819.7	75511.2	92357.1	66017.4	98856.3	106396	62150.9	91629	82551.2	108879	107529	67264.8	103812	78280.6	68783.7	78830.9	64419.7	72547.1	74238.4	64446.6	84662.9	49417.9	60028.1	51926.1	84037.1	70421.4	90295.1	60234.4	57651.1	84714.1	86212.6	58315.5	30914.8	75971.1	75860.3	39968	60736	84736.3	47371.5	47109	51839	86385.8	80802.2	67966.9	95289.4	96606.8	110081	70102
O15160	164163	142535	218567	170685	143873	222521	205038	206003	217425	174731	231488	249889	117143	161215	144404	136838	147701	132555	173035	203916	150071	161992	152316	187615	110299	142181	162011	173078	106027	122004	148677	143539	96981.8	96450.5	127187	144646	66582.5	75542	125747	78734.7	83201.1	80530.3	93553.4	95639.4	99413.7	153908	136232	128826	69786.6
O15164	26958.7	31855.6	41883.6	34887.6	27609.6	43577.2	42357.8	40328.7	32110.6	32769.5	54099.9	42631.1	22421.8	34703.7	33992.3	33123.3	28477.7	29648.8	41079.2	30303.5	32225.8	43787.5	35133.8	43504.3	18801.9	28975.8	31897.3	36570.4	23024.6	30070.8	36064.2	29380	22396.8	19200.5	32326.4	37976.4	22558	33192.1	49813.1	33855.3	32373	37764.3	40961.3	39608	44586	68506.7	67432.5	52687.7	34334.5
O15173	181906	133308	206592	174492	157473	214898	173589	182198	209965	154437	245716	224461	144871	199613	174844	173584	181260	153709	214518	185504	149142	180647	176277	211876	130188	149587	171820	176624	137010	140760	182601	171095	152888	124717	182085	180011	93465.2	125132	166054	115970	130422	134207	142438	147504	143295	222187	197190	183398	121412
O15212	279928	261739	399744	367254	272370	436016	372070	370453	373940	357530	446346	411331	229454	340687	338175	315653	283544	279707	382756	320146	277200	332613	322045	432705	203879	318288	380597	342592	200344	250570	351175	320427	191245	184522	279256	280736	194569	252855	355263	282382	217807	296698	310482	338692	279055	425102	437612	416424	258415
O15213	109194	101818	158907	126235	98877.4	147494	134168	132275	147981	121823	169992	166350	104845	133005	124129	123518	111273	108355	135456	165115	138002	132422	128295	136185	70883.3	95872.7	118907	131131	77350.7	102328	110163	112513	80975.3	71580.7	103642	114679	70389.5	80579.8	108342	80217.3	81203.8	84099.8	87861.8	103926	98081.6	133089	124505	131342	88912.2
O15226	69169	69507.6	100928	79358.8	54572	103887	89935.1	92032.7	88758	86786.6	112381	81321.3	65338.2	85514.6	73347.1	69466.7	65157.6	67636.3	86189.5	73160.7	75623.9	84261.2	88147.8	94903.7	40275.5	66271.2	83356.4	82439	43463.1	59551.4	66732.1	62483	45836.8	53611.3	59065.4	88543.2	43143.1	60971.4	84272.4	60963.6	60853.6	67978.5	65755.1	66818.6	71692.1	118259	101252	107804	58682.7
O15228	96331.4	80000.9	111758	93551.8	96896.5	112568	109593	128098	95365.4	95419.5	129744	122837	77529.5	98193.8	85975.1	82195.6	101170	97581.9	97001.2	117138	96655.5	118669	77084.8	112495	71503.9	69705.9	76297.6	86547.7	81486.1	89417.3	91753.4	88437.6	78607.5	63581.9	90665.7	98292.9	41485.1	57291.5	89414.2	56560.2	64340.5	70958.3	73177.9	71506.3	72951.9	91376.3	98624.7	92105.3	67523.7
O15231	30230	29465.5	35886.9	34120.5	29115.1	44646.1	52269.5	35145.4	37310.6	32205.9	51203.9	70447.6	43548.7	53205.9	46086.3	44975.4	47003.3	44295	51153.2	63503.6	45165.9	60462.1	49884.4	48857.2	21342.3	30628.9	35387.2	32692.1	25939.4	36657.3	39017.3	37671.6	23821.8	22852.5	33822.7	34719.3	35295.5	47436.8	78894.2	44290	41739	54106.7	58967.4	56473.6	59106.6	103358	85460.6	71011.5	54068.1
O15235	121919	106944	176063	153786	138000	207206	154256	166376	188279	150380	259453	208912	126633	190482	195035	188072	163049	146239	211780	144607	144449	179835	204603	136419	89023.5	106625	173349	147663	91075.6	104786	159369	146298	85693.5	81574.5	146402	86453.7	122542	112413	185730	133030	117416	121694	152714	155261	137647	229170	201872	207242	149493
O15254	89990.8	89352	106775	89287.4	88316.8	118566	88769.1	97413.5	103733	115931	132021	134963	79593.5	124782	99188.3	91904.2	112789	99552.3	113940	105729	103743	105348	92327.6	122478	64971.3	79303.2	99229.9	94295.5	80636.2	86178.3	103707	97821.2	90565	78761.8	102931	118524	78962.2	85601.2	129128	82222.4	99987.3	102670	96401.5	108352	104953	180491	151449	137614	96643.8
O15258	60827.1	49491	69213.5	72806	62296.1	99164.6	77281.9	69509.4	98736.5	71134.7	117556	108529	63467.9	94427.2	74012.9	72892.6	70602.7	61937	94405.4	66418.7	77189.5	82579.1	75696.6	101974	41961.2	56605	62996	68751.2	47988.2	54968.3	67028	69174	43428.4	47825.3	58110.7	50068.3	45267.1	48016.8	97662.4	51593.2	48255	62619.5	69633.9	59792.1	72869	120363	116280	100236	51926.1
O15260	216034	202234	308903	209958	243330	254914	282382	339010	245841	154961	303652	586889	199188	206325	201731	179045	206952	215770	199145	353524	209340	220852	168598	229617	174350	176036	195530	232502	202372	192063	221289	218319	211648	164628	212179	287444	127555	166182	236449	156439	168760	233041	187397	215004	188615	289140	289842	248239	164952
O15269	65394.5	76098.6	131448	87261.5	68624.8	104376	110454	106485	90036.6	102019	125260	102983	85040.1	96916.8	85090.1	89462.9	91951.7	93347	105891	100880	104510	108414	100965	113733	48071.5	63780.1	77992.5	84100.4	57766.5	77202.8	89980.5	89007.2	57485.1	58890.4	81119.9	79520.6	64663.6	77535.6	114913	72445.9	74505.9	90104.2	91649.2	90714.1	90814.6	147457	147797	134764	73363.3
O15270	90704.7	78986.5	116580	87356.9	82053.4	118094	99041	103938	106506	90229.1	125668	109612	82912.4	111237	96930.5	96152.3	99661.1	83234.6	120517	134493	101523	110936	88817.8	112718	60598.3	68133.6	93356.5	96153.9	68138.7	56807.9	91814.5	82722.5	71196	52735.9	84563.3	68605.8	103602	134714	202141	142831	139551	160894	173164	166038	159321	246386	245386	213704	129492
O15294	72687.1	65954.3	106512	76822.7	77836.6	117143	92817.5	99090.4	83630.7	73795.4	97659.5	84751.1	59196.6	75837	71121.8	65357.4	72885.9	64583.9	90682.3	96461.4	83257.7	88409.8	81855.4	99933.4	52837.9	66778.5	75454.8	79108.6	48149.3	60718.5	63506.5	61388.9	44818	40281.9	55511.5	55421.6	54882	62073.3	94975.4	61680	70243.9	71520.8	82111.8	86429.3	95520	132414	121802	106955	62409.6
O15305	125174	117295	186894	145681	110563	161886	134071	140323	159778	135211	202917	181631	145517	203741	167363	169584	158774	148955	200829	190494	146287	172422	165197	195803	89472.7	126799	144458	140059	99224.6	111449	142214	145649	98196	103857	140126	140559	79277.9	88345.2	121101	85331.2	88373	92756.8	92453.3	94455.8	97191.4	142081	126713	121792	99185.8
O15321	120785	140063	NA	177334	68973.2	153173	NA	246102	65437.7	144217	67594	251855	132858	165732	161101	51836.5	176416	156870	167241	NA	164867	165006	NA	178855	85635	98183.7	162821	41169.7	37723.2	125705	NA	77333.4	109129	114686	34950.5	NA	NA	58982.2	85564.8	146174	151029	163300	134665	163654	153374	272254	307669	182478	47751.3
O15347	264180	189818	306743	237540	241251	277334	245314	258063	267820	205633	281271	308548	157844	216839	175176	165094	192363	163163	208247	223219	161846	187917	192387	200652	190243	188043	231807	236236	196350	180006	244498	223213	167262	107339	184764	216434	186307	183669	253405	173069	188073	189532	205045	199524	211144	262205	269408	249220	121779
O15355	87893.6	72728.7	133889	99887.2	74424.6	130092	125538	102401	124920	97335	145458	152051	78306.6	120195	103138	97772.6	97115.3	94279	122557	122416	106298	120009	105309	133433	56292.5	81518.1	93787.9	99976.1	56872.4	66103.9	85945.3	80034.8	46011.5	41509.3	65684.8	90471	93695.3	109271	177702	113255	107133	122694	143356	130077	150597	207418	222043	200108	105605
O15357	75085	59084.1	92250.9	78827.7	76006.8	88126.5	97730	70795.2	91246.6	70656.8	89578.4	99337.1	52857.1	80199.4	78405	63182.2	70511.4	67591.8	80619.9	87005.5	59008.4	70843.1	68454.3	75757.4	46990.8	61307.7	69854	73085.6	53317.2	58229.3	68539.8	73396.7	45480.9	45899.2	59252.1	87025	63734.3	68133.3	99436.9	64243.2	80003.7	75565.7	85461.8	87671.1	84601.6	122264	103438	97055	55697.1
O15371	137911	126401	188234	147562	123350	191109	157144	167923	185278	157073	226314	217014	109147	162370	137309	126004	132803	125709	153220	166282	136922	169013	140156	188356	100395	122611	152174	145301	91067.9	105810	129892	128267	82931.5	85776.2	118458	159646	99093.8	118537	181635	121407	116881	133496	143293	147896	148847	225451	211344	210589	111307
O15372	112619	96822.9	173426	135601	116251	172410	143908	155017	163813	115034	190654	164359	81900.4	133511	130287	117308	119835	97940.5	147399	143129	112034	132840	126109	159836	85777.7	103928	129505	141871	80907.7	74174.7	122045	119056	70314.7	66227.1	103694	125316	86389.7	108800	154969	118387	104148	120995	133147	133869	150917	212527	198660	182366	107263
O15379	72826.8	55671.2	79619.6	78890.6	65655.2	84427.9	87354.1	72391	81238.1	75576	104645	87701.6	50255.7	79004.5	78040	74137.7	77163.2	58046.6	91384.4	84532.8	62689.2	86595.8	69918.5	85681.3	44873.3	64710.4	64568.9	71033.8	53232.4	55197.4	73460.1	73317.4	52762.9	46824.6	73834.2	75891	54185.2	62760	93676.4	71942	60567.5	71633.1	88665.6	73933.3	83368.8	136149	139518	120758	67090.9
O15381	83408.7	82112.7	108467	86624.3	78764.6	123825	119253	103170	113984	100714	133157	155931	71813.7	92659.2	92994.3	81321	86208.9	82719.8	103032	104954	106948	88677.5	90312.6	101760	56883.2	76136.3	87484.2	95857.5	59769.9	73404.9	83044.8	78981.8	57935	47244.2	74439.3	74579.7	49812.5	60428.7	100515	59995.5	63640.5	71279.5	76978.5	81310.7	80385.9	111834	108406	110313	60102
O15382	94357	86906.4	186534	100828	94468.5	124085	103418	145441	115045	114843	147031	189490	106669	150432	133759	120851	134141	119203	162553	170460	135464	122403	131176	149836	65652.2	80411.2	92688.1	97686.1	88041.9	86578.1	114149	108363	113274	105360	137465	158571	70349.4	66960.9	94743.6	60114.5	72997.4	72665.5	76220.4	72744.1	71377.8	131432	99001	93407.5	95447.5
O15394	134384	108087	160407	150194	116500	157943	135469	122945	161414	124652	186968	154150	175625	181495	192984	166875	145587	147265	222685	192364	133199	152078	173494	210023	88498.2	116824	146158	146136	102061	105835	156460	148645	104271	85259.5	145161	125388	NA	92139.8	150121	77796	147109	127654	101727	103417	110022	171678	153516	116862	110820
O15397	66854.6	52177.6	75229.8	74904.1	68255.5	99355.5	79327.8	68873	99450	64737.5	112881	76917.5	49277.6	73695.8	72530.1	63839.3	62961.6	53431.4	82053.3	61675.6	65380.2	67233.8	61703.8	98124.5	46236.1	64478	70664.3	76289.5	43668.1	44771.6	59266.6	53063.6	37249.1	31827.3	51139.6	44113.3	47355.9	59741.9	102209	59673.6	59270.4	65966.9	73353.6	76263.1	77409.7	120497	124234	118228	57120.2
O15400	142749	116002	147570	148447	127862	162495	126776	122091	151461	126189	187448	191907	136665	201523	169806	157717	167911	145002	196415	164842	151179	159050	146620	173909	98876.9	125955	141113	144124	127088	121689	152819	162360	126108	113303	150917	144826	80796.6	101456	119271	97742.8	93716.1	103233	120410	115111	104737	157128	142802	130231	117238
O15409	NA	NA	NA	NA	NA	NA	NA	NA	NA	NA	NA	NA	NA	NA	NA	NA	NA	NA	NA	NA	NA	NA	NA	NA	NA	NA	NA	NA	NA	NA	NA	NA	NA	NA	NA	NA	11089.2	3015.89	1747.96	3659.35	5473.96	2709.16	3299.04	4382.61	5530.76	2573.29	29049.1	31216.1	4064.91
O15427	179386	146854	303332	201148	166990	225088	187879	203360	212209	197424	238015	324613	115154	155028	185406	158034	148692	138002	247732	246892	148065	173855	165386	209328	128809	132443	177320	196904	151939	136486	179293	176635	133192	84415.6	159319	155160	160860	164938	212963	154705	151033	187532	196020	196207	166451	278782	260412	254159	110107
O15439	38561	31306.4	57409	45349	40893.3	65612.3	55944.8	50343.5	59609.4	44282.9	71988.1	59524.2	26825.7	49695.4	48645.9	38506.5	47756.8	32846.5	53351.7	42428.5	35910.8	47175.9	36897.6	54136.5	27521.7	36833.7	41279.1	47244.7	33199.2	29934.5	40667.4	41795.1	32387.7	26777.2	41355.5	40224.5	28422.8	31896.2	50241.6	31496.8	40057.7	38040.9	39605.4	47903.4	49273.6	76485.3	65580.9	58335.2	31628.1
O15446	96944.4	82108.2	112674	99587.5	85804.1	122822	105560	94721.1	118744	90648.5	128264	128487	77223	104879	101516	88683.4	95517	80775.9	112357	105877	100077	98210.1	90058.9	112710	69249	80857.5	101458	104497	67057.1	62914.7	87795.6	85512	51098.1	48013	72222.8	74570.5	55373.3	72740.7	108737	78826	69960.9	80139.9	90747.7	93710.3	94578.8	121152	115800	130005	74926.8
O15498	148962	106663	143236	152620	137011	203378	138046	94465.1	182246	133410	230266	132156	126595	203427	179824	162092	172185	124907	228842	166524	135923	138657	131895	203219	105850	138717	150746	157311	123476	108715	167308	155536	116779	85474.6	147637	67513.3	106232	123506	166810	131120	123628	134255	152038	144148	163075	241144	214033	175339	141460
O15504	67551.7	99277	82209.3	76463.6	68082.7	114489	79444.4	87955	97408.2	63676.3	203000	NA	11897.5	80889.5	79486.4	80853.3	74185	63931.3	73453.7	NA	66385.9	76951.5	63870.1	101653	47367.6	64443.6	93937.9	90576.8	45943.3	47544.5	74238.8	63720.1	41423.8	NA	NA	NA	37410.8	55063	14967.2	57518.4	20920	51593.8	63612.3	68003.8	66517.8	168276	112330	106532	39101.8
O15511	191295	144045	244898	205092	166796	216372	184539	174280	194646	132296	250091	201611	136567	213206	189138	195826	195796	140437	230977	195482	141974	157531	169729	208083	125140	160650	204161	196950	150175	169620	211192	208932	140366	102166	193956	159248	173126	220355	267533	218911	191416	227958	249351	252263	209552	311786	319511	280847	208673
O15514	66380.6	55327.8	44037.3	68256	55887.1	88333.4	62644.7	57809.5	83399	41946.3	98511.5	55627	44079.6	86200.8	60397.8	57452.1	83909.1	43416.5	79534.4	46782.7	52583.7	57208.2	49510.5	86916.8	43712.6	52470.8	50280.6	57371.6	48153.5	35635.9	58464.3	62029.7	37695.8	27349.5	51065.8	45133.7	59432.5	49773.6	97279.7	68573.4	51854.9	61029.1	70886.6	83195.9	67316	103140	106016	130839	60616.8
O15523	147849	85809.7	176636	153025	121208	172287	132511	149346	139276	120303	180503	146824	103610	160848	165387	137981	135337	104881	188390	151662	79756.9	119817	136630	183331	104114	126930	152101	137358	92141.9	96153.7	127118	124920	81037.9	54866.9	109960	105367	68912.8	94326.9	134484	94311.1	85940.8	99637.6	114106	115777	110325	171623	146674	132947	90153.5
O15525	153938	114959	237295	147387	111156	156025	173609	195261	136750	114119	181888	249428	99624.1	128953	113831	101592	109180	99770.9	108059	199182	118376	100108	106051	119236	106997	126289	131865	140875	97959.8	111520	117938	119502	106153	76696.8	124726	152564	128344	146974	171302	123841	126454	119865	126112	123952	113283	142542	133062	118326	104545
O15530;Q6A1A2	64204.1	58809.5	76521.5	87749.3	71419	123983	88495.4	84418.8	146144	69666.4	149254	145598	78870.5	115201	77831.7	91157.8	111480	113178	93103.7	103738	83412.3	122947	68850.9	129638	52665.6	95830.2	80009.7	102021	71243.7	130889	86770.9	76475.4	71431.3	27060.7	64542.5	66534.8	99386.4	86712.6	126180	69913.6	67126.2	98955.2	84339.5	97380.1	84838.8	158644	153252	139608	85013
O15533	106482	89494.1	118764	117313	121080	168659	119749	114773	130735	98431.3	162294	120107	135603	185110	146217	148475	190165	147025	200864	170739	140357	167952	120779	169441	77458.9	90173.5	103112	127450	104523	116876	147651	150709	125061	90455.3	158947	111530	54099	66324.5	119950	63205.3	83399.2	89567.3	111797	99562.6	110298	177202	147038	124454	97893.6
O15541	NA	78971.3	158022	43550.4	NA	48920	121819	49014.7	48393.1	134497	48535.5	321260	49907.1	41775.6	40656.2	36961.8	31959	106256	54442.9	70172.1	47078.5	161943	56942.9	50146.5	NA	27300.5	29318.2	40630.3	21435.8	98756.6	36917.3	33705	18016.4	NA	31005.8	128768	54662.2	41311.6	59370.3	46727.6	47920.7	42501.7	59644.4	49869.5	43311.4	79200.8	61589.8	68739.8	41609.9
O15550	29296.2	24965.3	21587.6	34634.7	25135.3	39105.6	27250.2	15208.6	36935.4	29681.2	52961	34342.3	23101.4	29098.9	32558.5	29638.5	23686.5	18335.3	35402	25046.2	23679.2	33435	NA	42011.5	18234	24230.6	24255.9	31706.2	20035.6	21050.8	28383	33427.9	20616.7	11293.7	NA	NA	25286.9	29877.1	42278.6	29235.9	29623	29974.9	36911.5	34997.6	35719.7	54228.3	58168.1	47552.5	31123.6
O43143	188357	151402	222438	210286	169327	256153	208651	201146	251014	191454	292378	256298	144593	199825	180413	173751	173826	152626	213890	191977	175383	197895	177270	246023	130494	174682	206531	207946	139497	147660	194917	191896	130716	108773	168359	154780	157196	178981	273153	184591	193336	196434	218282	220998	226721	328956	330325	314947	156913
O43148	122853	149826	199868	152770	108947	172931	168537	218306	157142	155775	196533	214527	99684.8	151943	117222	123215	122403	142813	150647	199549	157813	168017	145200	137635	89136.3	114465	144845	142613	96294	133344	141255	141354	101011	84732.3	115327	144116	101733	145036	190221	132789	120366	143576	153606	152951	148042	217334	185663	188729	143159
O43149	60632.5	55080.1	79706.3	73203.4	55691.7	79446.9	68268	70820	75480.1	58862.6	88786.6	79433.8	55521.5	79669.6	74867.5	71641.7	72898.6	63751	93639.1	77757	73082.8	78518.8	69629	84372.5	45312.4	56735.7	69083.8	66155.7	50109	50606.4	73075.7	72075.6	51362.4	46230.6	70776.3	70080.6	47468	56969.8	82591.7	54668.1	64487	59984.5	68042	66469.4	65231.3	112267	94667.2	79995.2	68721
O43156	77207.8	111124	125324	97685.3	74034.9	124170	117734	112297	118950	111980	133372	153391	79986.1	91889.9	97678.9	87050	71064	99184.6	99290.4	161684	120582	118626	108533	116310	49446.6	78550.9	94054.8	90440.3	64535	128238	86119.6	85665	58085.8	93681.4	77027.4	NA	79257.1	68332.9	108780	77543.7	74074.6	78368.2	93799	95404.3	100979	155121	119745	126807	72301.6
O43159	45319	40342.4	69311.6	53444.5	49150.9	71985.1	49300.5	50878.8	73274	54055.1	97703.1	79208.3	49081.2	65480.6	55673.1	50598.6	62086	46523.5	59799.6	63040.5	54414.3	65269.1	55221.2	74094.1	33735.6	43520.9	53823.6	54233	37089.2	47974.4	50522.5	51571	35541.2	23672.7	45457.5	39805.2	24450.3	31518.3	55993.8	32642	31718.6	34243	41863.1	38083	42245.6	75955.3	70422.9	72975	32854.1
O43164	6446.59	9243.28	NA	7593.24	6734.73	13864.3	NA	NA	9265.86	NA	16212.6	NA	NA	10490.1	6678.23	NA	6679.29	NA	6960.43	NA	12161.5	7738.24	NA	9973.88	NA	6070.35	6185.61	6917.98	NA	8101.81	5640.72	NA	NA	NA	NA	NA	NA	2065.45	4943.97	1544.95	NA	1093.45	2343.66	1551.87	6044.08	7485.98	6602.5	9977.38	5651.63
O43169	239452	223828	246032	260204	207654	324855	250000	232479	267197	210426	349319	281777	237067	316084	283605	246456	270881	233870	294143	239826	242073	289570	276069	317375	179587	203652	230300	266725	199028	216859	267379	246313	220397	184893	245118	216193	273843	353475	464708	298662	322941	361349	333185	330362	342314	575341	502990	436190	340818
O43172	129084	106870	160972	139066	118566	169392	135970	146082	156344	130262	182968	163180	96405.7	144948	124729	123309	120811	116835	157037	156114	117131	129192	120091	155931	87491.9	118689	138924	134284	97289.6	111707	129805	128727	92788.3	80590.1	115311	114074	97574.9	113444	169721	115471	106775	122551	139071	132920	138663	200219	193461	182070	96565.3
O43175	194152	155133	216979	191939	156598	227440	192513	163901	375361	305346	477423	394061	168006	236290	218770	208974	185115	166737	243023	215737	206651	237522	205964	274496	134665	160548	200209	178474	152248	148656	201135	180206	134683	99028	166187	130793	267264	155362	190122	137203	209634	147323	147241	143460	206825	220836	256378	306205	85028.1
O43181	126995	101243	131548	122054	133865	161905	123336	130240	188120	153231	121057	183993	139774	183387	151690	135722	178961	131152	192559	142904	173878	164338	114073	196814	90601.8	109507	122998	118583	119496	114407	135661	139362	116804	104593	143960	158275	100655	99095.4	125895	83489.8	100136	100945	101148	99766	106763	173828	149061	140228	116685
O43237	50464.1	48811.2	71214.2	68696.8	44917.3	73353.4	57148.3	66268.6	73855.7	48909.7	86679.9	65235.9	66087.8	87524.5	87444	79134.9	81589.3	64587.3	98595.8	70960.7	66599.7	76691.9	77832.9	99499.9	45325.2	49142.1	61631.5	68013.2	45664.8	49984.1	62608.4	57854.2	42098.6	42425.2	62057.4	72000.6	55277.9	70781.8	94044.3	66579.4	64732.3	76863.8	80658.3	78365.4	73792.1	119688	106986	93439.6	85559
O43242	146890	128270	185981	156544	137231	193544	163867	171478	195688	148057	221694	212821	128539	175974	159274	152281	152894	135904	187958	174739	149131	165235	155749	196414	106300	130539	157664	160870	118722	123546	161991	159754	122624	104905	142093	154165	128133	132085	190872	130837	126187	144974	153427	147823	161794	224764	223947	208978	123059
O43252	91642	77185.3	115074	104366	90362.6	125891	67474.2	106536	119767	85327.5	162951	99959.8	82354.4	109532	95863.4	101542	99272.3	83205.9	120692	108459	75644.7	81009.1	94687.2	122305	63146.3	84295.2	95878.5	100992	68481.9	53887	106115	95207.2	55943.9	56938	87783.7	82688.5	43195.7	46023.5	66829.7	50148.5	47517.2	54414.2	63335.2	58034.9	51852.3	83733.1	75783.9	73172.2	44864.2
O43264	85582.6	73630.1	104540	91757.7	79311.6	114237	95879.8	99216.2	112100	91426.6	124923	95497.3	65667.4	91985.9	87943.6	86450.8	85854.5	70663.1	102029	89731	81607.3	90291.8	88664.7	112243	56235.4	70430.3	85848.4	91717.9	60603.3	65684.2	89642	83222.8	56403.5	47771.9	77613.2	85922.3	46581.9	52752.1	80941.8	62086.1	57403.4	64733.4	69230.5	69485.1	71214.5	104815	109153	107804	55061.9
O43290	94816.7	85190.6	142296	104330	88830.3	130391	117202	109868	129965	103067	149563	136040	86206.1	112905	100812	97127.1	99883.7	89497.4	124459	122650	97901	113683	112651	127182	65779	82395.7	100029	105616	72148.7	83746.6	105355	98733.6	61745.1	58136.8	87115.8	92236.2	66584.9	79477.3	123388	83304.6	78255.4	91899.4	101090	97347.3	98979.7	153532	148996	135402	76487.3
O43292	107424	208190	168303	103870	126636	154037	160666	151158	143895	123897	116287	154712	116982	100059	94148.1	78830.5	111502	96144	108137	166019	107954	106715	231833	116380	115393	82417.4	77783.8	78941.3	89597.5	96151	102384	98186.1	90424.9	131849	99946.7	220337	66962.2	63384.6	83299.3	53375.7	75066.5	66585.2	71419.8	75028.9	83773.9	145496	109906	100797	78456
O43299	58463	32112.4	49010.1	53957.8	52449.7	78181.3	44004.7	50121.2	68199.2	44534.3	78257.2	47949.2	43288.7	69627.8	69770.6	57687.6	62891.2	44746.4	80016.2	48604.9	48199.6	58209.4	50733.1	82645.5	33481.5	41204.7	52297.6	54491.2	45136.3	32804.7	56789.3	58968.1	44699.2	27665.1	51198.2	36471.2	37765.6	42300.6	61362	44086.3	49980.8	45405.1	53006.6	56202.3	45487.5	84519.7	76063.9	63292.7	50082.8
O43314	66921.3	54921.9	73838	72447.4	59992	88115	70823.4	68303.4	81170.8	61332	103833	75988.3	47544.7	72846.2	70800.5	67895.7	67243.8	56994.9	84060.5	57527.1	57420.2	60690.8	61788.2	84798.9	46667	60787.2	75379.4	76753.6	50934.1	50256	73432.7	68198.5	47881.3	35156.6	63873.1	53243	39680.4	51147.1	77465.5	51001.6	51785.1	55948.5	60952.8	62065.7	58950.8	101777	87380.4	86566.5	54840.8
O43318	53320	46622.9	53909.5	46397.3	64816	75798	64275.5	59846	102536	49793.7	78434	63596.4	42447.6	55616	37742.6	43828.4	65244	45539.4	44635.7	59069	49826.9	54915.5	44256.1	60983.7	35294.3	39895	38580.5	49058.5	28552	35976.1	43738.3	44337.4	25898.7	22032.6	32153.5	37514.1	32369.6	27520.3	42571.9	29580.5	30017.2	33930.4	38747.1	37392	43022.8	68203.2	67130.1	55504.9	26444.8
O43324	480961	328885	474799	463081	457194	608572	438174	457432	593072	433411	622578	404933	369290	493202	460020	445293	410533	320743	533344	437667	368409	388081	449484	552707	345329	394471	385795	465858	373515	254994	444390	438121	335001	278330	417663	377747	222433	246678	349595	249958	239791	250930	293586	291675	278125	381212	397829	401213	221185
O43353	123933	NA	78574.1	68727.7	92625.8	115228	77871.3	60942	103213	NA	88540.9	NA	86077.4	103470	69891.3	67401.8	92040.1	NA	84243	56414.1	80450.9	76946.2	75336.6	73135.9	NA	78367.5	69681.2	72142.8	71858.2	NA	69743.3	71584.7	50876.2	NA	49222	NA	24559.6	46279.6	63235	40698.3	57487.1	41640.6	35607.9	58351.7	58883.3	88623.5	72262.9	102204	50185.3
O43379	6917.96	6569.49	11609.7	9979.04	6406.5	13323.4	15804.6	13241.3	15804.9	11394.4	23350.4	17372.2	7023.19	6034.16	6161.25	5975.7	7085.44	5117.75	9399.82	7595.11	11604.6	15378.8	11796.2	12365.3	3783.29	4698.01	5845.13	9909.89	2923.88	NA	5686.71	5543.16	1330.32	NA	3949.56	NA	4706.9	2320.2	13393.8	5421.98	5325.1	6390.82	9712.64	6983.13	12467.8	17296.1	17196.8	15374.1	5070.47
O43390	208172	160207	216625	219481	185897	261793	213553	200449	280192	207561	353533	271621	171200	228361	202541	198175	205338	166604	235046	190283	192953	207382	191759	251552	145244	180876	210877	215562	162699	168259	213108	212593	165183	123137	201484	174960	161014	213539	314006	220707	210343	234502	249413	260766	252568	368125	376597	366307	196386
O43395	131887	117863	171188	143676	109244	165207	162999	171924	160265	149140	186701	197122	113702	139129	123091	126633	123760	144949	141353	150920	137881	155401	148605	155292	89801.5	113504	142009	143532	99459.2	122345	135982	135380	89335.2	91924.9	117948	142913	87371.2	103736	151874	106945	92956.6	111641	125386	131058	119259	175008	171849	175506	97427.4
O43396	139148	113433	161566	153807	122990	172437	147796	151348	172829	138890	165545	194967	110643	146850	138378	135805	130464	115496	165939	161812	129000	137098	141124	185547	100489	126523	147668	147295	106630	107840	145991	146389	103456	91993.7	130761	134429	118321	136686	188121	132397	131239	146206	160828	153335	158815	237586	204577	184171	129604
O43399	147685	110536	157232	143581	121703	172128	127233	125807	159528	123567	175183	187195	109266	176176	143859	133693	151195	127320	173057	148996	125003	133306	128171	165159	95622.1	130544	141119	137300	105407	109485	139382	137020	94312	86341.7	119860	123355	75044.7	94319.2	130032	93865.8	82835.8	98292.8	114102	116631	107223	148177	147859	129226	97170.9
O43402	68456.3	97173.1	199387	108792	72924.9	NA	213605	NA	94939	173848	110292	NA	59654	70847.7	82387.3	78577.4	55644.4	128191	98634.4	259295	NA	81247.4	134422	93454.5	68662.5	76749.7	55837.8	64189.3	49950.2	NA	80913	75084.2	81352.1	NA	84272.3	176105	42510.4	45547	148461	99522.2	70451.7	103851	91184.4	85991.7	107855	139899	131477	117897	98930.7
O43427	111795	83604.3	106111	109578	97969.3	130906	116082	115291	124709	104548	145216	124354	69236.2	124166	104253	106599	113630	97173.1	140041	111976	94429.5	117161	90675.3	154914	73276.4	93166.2	89041.1	108904	76798.2	85658.1	102290	102413	79247.1	68870.1	103336	105294	48039.1	63456.6	99942.7	65140	71554.6	76509.7	80879.2	95071.8	70209.4	157248	118424	134418	82979.5
O43432	69858.4	70880.5	110066	81916	70477.1	111908	90791.6	109861	101049	84264.2	119592	105860	62320.1	84843.8	74947.3	70088.1	72226.7	62764.5	86657.1	91647.9	85871.8	91719.6	74848.5	95216.5	51708.6	64912.6	84687.6	86542	48453.5	59586.7	69205	64401.1	46234.9	39398.4	61365.3	72663.7	48993	61913.1	96627.6	63196.7	61746	70297.5	85404.2	83004.9	80244.9	125358	118838	106798	55959.7
O43447	66598.1	41917	83604.4	73307.4	57373.3	84147.3	64728.3	73920.7	82420.8	62624.8	108016	96532.9	40577.3	72209.9	69293.4	57270	57681.4	47641.6	70388.3	108939	52383.5	60538.8	58766.4	77029.7	44323.3	61800.7	73560.4	72445.6	50335.5	52863.6	79171.3	68416.1	48787.5	33432.8	66438	57409.8	51567	57860.2	78566.5	55294.3	53785.2	59256.8	67854.1	65396.6	72755	100657	94847.8	91437.6	57642.2
O43464	87350.7	76037.2	103402	88996.3	81986.5	102402	105339	96430.1	105787	97055.2	133330	150504	82118.7	103197	106069	93637.9	86014.9	95693.2	115169	110018	89149.6	102898	100346	122881	59059	73821.1	85912.6	84929.7	69500.8	74463	91052.7	90536.9	69131	60635.1	87952.2	92807	78683.6	82066.1	111638	75916.8	76449.7	92081.3	92573.1	88433.4	87367.1	149486	137023	123437	93038.7
O43488	135755	117432	120502	146026	126483	182934	137756	107421	160782	114246	200404	145331	184048	287659	245281	229535	236796	185001	278738	167905	198204	217829	172725	240144	96264.7	126654	141220	138908	129569	127231	172125	153716	146774	108594	180876	127614	129754	158477	221488	167599	157055	168319	186965	197318	171465	265215	247574	242155	219528
O43491	NA	NA	NA	NA	NA	NA	NA	NA	NA	NA	NA	NA	NA	NA	NA	NA	NA	NA	NA	NA	NA	NA	NA	NA	NA	NA	NA	NA	NA	NA	NA	NA	NA	NA	NA	NA	21314.5	14763.8	27826.7	16372.1	3830.61	20455.6	24455.4	20674.5	24539	61190.7	69373.6	62748.6	NA
O43493	28363.4	19926.7	7594.68	32585.4	23994.9	42513.2	23305.7	11354	30075.2	18390	41714.1	13101.7	18549.6	28243.9	27221.1	22243.2	21235.2	15545.1	33740.8	8717.38	18768.3	20075.8	26526.3	31302.2	17932.6	25211.1	30570.6	31063.7	18896.9	21193.7	31333.5	25535.9	19010.7	13208	28021.4	11026.2	28326.1	27636.4	40838.3	26165.8	31265.2	30485.5	34932.9	32911	40246.7	60514.5	51808.5	40256.5	23001
O43504	94247.3	87352.1	146718	122767	102065	137342	131168	138737	131027	105494	157067	219131	87171.8	131599	134500	105918	112560	114369	160739	137241	110240	106349	105231	146896	80410.5	78683.9	104170	113764	77315	79091.7	111741	103583	73905.8	53522.6	105317	121122	116644	95523.6	134671	100125	89690.7	116376	119315	121652	105235	219220	166795	135740	118587
O43516	217224	180946	262008	242299	195572	267096	240169	220998	256928	220519	346594	333662	205748	319033	268114	262769	267331	243586	310334	286306	251127	267557	246703	336021	145881	188852	233287	223136	167426	185797	245101	238043	149379	146917	220287	199848	92998.1	124479	193799	128823	104883	141635	157849	150030	153017	232620	222844	208545	110017
O43566	63570	62263	96332.6	77356.4	66696.2	94703.8	80781.8	84218.3	79375.7	73313.7	82901.8	106718	71975.9	122682	97474.2	86209.8	101039	113161	113834	120546	87006.4	98949.3	89166.1	111471	46031.4	62863.4	69460.6	74755.5	53296	64129.2	69944.3	69647.1	59920	55881	66722.3	88845.9	75473.5	84283.4	120792	73610.2	82848.4	88812.6	93578.4	90677	82005.9	143940	105528	95253.7	76795.3
O43583	113780	76426.4	89068.2	113320	93961.9	133218	112005	88748	138444	94086.6	160814	102598	106472	146156	128509	116256	128401	100177	145974	74269.8	83504.5	109226	106723	127831	72754.6	88420.6	99704.4	92084.9	80238.5	88912.2	114412	109020	85736.4	71481.3	101582	63586	86440	103006	159726	100674	99250.1	116229	129361	122441	108281	187167	170305	167231	107713
O43592	103535	74440.7	118400	106348	91303.8	124385	105316	105778	141848	111379	161393	130175	76998.2	103493	99511.9	101126	92822.8	72701.8	116293	102089	92391.5	96884.5	98433	132901	70425.1	86223	97622.4	110475	78114	67405.6	104905	100863	75978.1	54892.9	89907	96960.3	77400	84592.1	131381	88315.2	90030.9	95698.2	103703	115455	107192	168717	166869	173468	77567.9
O43598	257806	249778	372891	306693	252605	378329	368969	320243	358766	316686	493292	379743	293028	406178	350062	346497	320060	302640	424542	383216	337479	366888	322656	470069	170765	236448	274383	300797	187342	254830	307381	287384	202394	182329	277195	266938	153262	234770	351617	253526	232585	270980	280414	313276	302184	478751	447445	451080	277385
O43615	173146	134856	209466	188822	158302	227103	182599	171550	253498	194254	298887	257052	135644	208336	201837	183170	186338	164662	237643	199399	183434	180582	189867	234591	120267	151579	195396	195455	148165	136837	199903	195338	143847	118169	183279	169200	82822.3	95393.8	129190	97688.4	103167	104594	115770	117179	120325	172984	173999	165523	93476.2
O43617	155509	112115	169459	167884	149301	194142	183809	160237	197086	140988	253638	182652	110818	191353	183772	171936	177783	146342	240386	178634	118884	161099	167913	218346	108046	128435	175516	163698	125542	109027	183802	168540	130228	94745.9	173584	159269	146379	176437	227313	162403	183764	182110	204203	194437	208184	322501	274006	253613	172672
O43633	101593	97952.9	110313	102019	89559.8	149765	114460	108943	138313	109092	139325	141713	88807.1	121550	117816	109604	107705	107016	133176	125046	113502	111079	123021	148614	66254.4	83739.7	102781	96032	74390.5	84075.4	93336.3	96422.8	79052.6	67986	89328.2	110965	89169	110233	157262	94937.9	103738	129577	124126	118321	143284	215087	177477	174724	109132
O43639	133669	82339.4	135230	133905	133467	141991	132525	111767	142030	113066	182100	138219	59257.2	123692	131386	112616	116599	54751.5	111840	87691.7	68701.6	79930.1	74039.1	102006	91150.4	111151	124776	134216	114919	66756	122213	121855	85635.5	51687.6	95004.8	71999.4	NA	104564	151925	91724.8	110160	107626	105902	102274	126915	167634	143200	157687	78778.1
O43660	58805.3	54468.5	87596.4	78821.8	57817.6	90321.7	70557.2	71808.8	93580.2	62792.9	111468	96833.7	52401.3	82635.4	73610.7	71267.1	67484.6	54099.8	82802	79154.1	60399.6	74632.1	69098.4	92330.8	41192.9	58502.2	75734.4	77502.4	45098.2	51674.5	72751.2	69040.3	39874.8	34817.8	60271.4	69974.6	45625.1	53186.1	87097.9	59479.6	53842.5	55985.5	72132.8	65349.8	71040	104762	109954	106354	53515.2
O43663	36908.2	84166.1	NA	67297.3	41595.9	102844	NA	NA	NA	NA	67214	NA	NA	NA	NA	43138.3	NA	NA	NA	NA	92133.4	NA	NA	73948.5	NA	78289	NA	85526.9	26791	NA	NA	NA	NA	NA	NA	NA	8830.33	21981.3	26148.9	24331.6	30094.2	60770.8	81095.2	73942.7	125679	34289	100360	140153	22850.3
O43665	34688.8	26438.9	39501.9	37674.2	33575	52820.3	53628.9	51845.5	44291.5	28152.8	50676.6	57118.2	28905.7	57135.8	46541.9	42892.1	48597	42175	58847.9	59879.7	50905.9	54623.7	39978.9	52031.3	22781.3	29987.8	35232	35885.1	25170.8	16033.6	30944.4	30709.9	22841.9	12835.5	25164.3	20753.2	47723	68180.1	116220	60869.2	87360.1	84082.1	96848	79288.8	94847.1	164231	135328	103968	81076.6
O43670	159139	152584	239616	213329	160103	230129	164260	180799	234432	158895	289327	265083	148592	208239	192650	203136	182449	161503	215036	195895	199985	197308	182637	249118	115079	155542	179128	209912	120745	132433	205212	180958	91142.2	101410	149852	148233	144269	168236	262150	189163	138611	179384	209264	215376	213937	327614	317880	298022	156794
O43674	109183	77259.9	127665	144499	126615	181595	100301	100998	157966	107194	229273	175535	109110	177736	194007	161159	165649	88538	195166	96903.7	89023.2	158442	137830	193712	77000.9	110397	130955	127896	106071	99726.5	157276	153152	143790	118709	155407	84974.7	92498.1	99931.3	151933	101522	114241	113065	116137	133561	126336	188769	187558	211150	137151
O43676	413339	256546	368868	417101	423855	495798	383505	383422	507101	340723	503306	458062	394555	571583	513789	499660	548172	389396	580466	472880	383205	454451	480872	576009	311534	399472	386319	404457	394387	281411	503558	501049	546112	288357	500944	467267	292664	282780	300578	263679	309505	286853	345161	324868	327374	438253	493440	482299	393929
O43678	527656	402727	656884	562906	548295	677006	517279	796462	730864	603573	598392	902455	494673	716358	617793	608238	671410	571978	775884	986914	614365	633722	503118	890136	405454	518331	526273	495397	484073	404349	579806	632881	549047	414346	580431	816087	501706	421510	479914	366673	385260	423898	414020	424047	480643	601028	595176	556090	493979
O43681	215921	176180	241799	227496	202551	278522	243679	229441	289743	226302	326918	292598	200365	304222	269445	247456	255551	235521	306063	261681	233758	267357	242832	323759	148115	177890	216418	225795	169330	156215	239598	232325	174661	137071	223609	199506	153154	181344	301085	194843	216904	227187	254309	256344	256901	422608	385633	358407	223359
O43684	217428	160085	252598	249649	210815	304916	221131	204183	304741	193655	338183	266129	160995	267548	224370	218207	231627	167966	263554	231825	175471	200558	228532	275440	157130	204326	233574	237883	171661	150387	232364	219599	161384	128610	201590	200279	199350	235340	364871	241828	212495	249870	282945	282134	294790	405898	405044	402056	209717
O43707	255754	170283	245897	252430	229869	290606	214378	199814	266279	193707	330207	265438	168125	269657	236438	225699	242889	179614	291725	214704	174992	193196	189538	276825	178521	208906	249218	249016	208852	175975	287661	272492	188247	140767	261715	204819	170494	199903	268490	202822	186776	209992	226483	237682	216251	323694	302585	281210	207128
O43708	136984	89244.6	87140.3	121443	121525	164164	105858	93362.1	145088	108648	181276	110229	120338	160803	152695	146621	152978	116769	192058	169458	122739	148481	142310	163445	92318.2	106535	117563	111658	112601	95840.4	162476	163475	111790	95079.2	157763	72226.1	138467	145285	172996	138019	143379	143670	165979	166726	146866	232327	201149	184925	183416
O43709	61624	71814.1	NA	80514.7	80414.1	104056	91725.6	63519.4	78460.5	73638.1	123745	NA	NA	84540.8	81866.5	72904.3	97658.2	48056.1	100441	57831.2	70154.4	71479.9	89740.4	84897.3	42578.4	74680.6	94890.9	87922.1	46672.8	90264.4	77372.8	69250.8	45876.8	NA	70832.9	NA	74833.3	82461.9	123694	86396.1	89387.4	90112.7	105290	108563	93122.1	143169	175206	134801	90854.4
O43715	37935.4	29524.5	NA	70398.8	46929.6	70176.5	50904.5	31407.3	74673	103670	65639.8	181814	32988	64416.8	48173.9	53827	60833.3	132866	75502.5	156033	39397.7	53038.1	129855	97607.1	31594.1	46819.8	64654.5	63883.1	29717.5	20755.8	59703.1	28525.6	23035.5	53900.3	34756.7	83918.4	51802.9	58519.7	71695	56407	57184.9	61066.8	77357.3	80136.4	71961	100119	105310	85909.6	75959.2
O43716	87932.1	94584.1	150453	97738.5	98593.2	132428	120179	136142	105379	90433.8	155901	134504	80699.2	102487	102620	109143	89273.8	97949.3	125326	150920	114657	114762	107984	126928	66294	96117.3	98711.2	90696.4	75125.7	71017.3	100179	93759.3	58360.7	66175.9	83418	115403	20371.6	65351.2	92226.4	58215.7	69341.1	77210.2	74879.5	83929.3	79981.3	118603	97937.9	96156	67912.3
O43719	79604.2	74719.5	78553.1	79883.5	71833.8	95093.2	81739.5	97458.1	95950.9	75318.2	110080	104036	76995	89395.1	84397.3	77697.7	80262.3	69629.9	93177.6	73070	91929	90289.4	97746	102792	52540.5	64238.5	73993.3	78146.1	61681.6	76006.1	73966	72702.7	63179.3	55322.5	76064.6	61166.9	59833.7	62629.4	78769.6	59384.2	57013.2	66979.3	74264.7	65895.5	68498.6	105822	94206.3	89921.9	65612.7
O43747	104837	87951.5	128712	115799	96081.5	130562	109566	127769	121275	99083.9	144481	129403	89187.7	133057	124013	114173	112183	91936.1	133240	125725	106676	113773	101156	137712	72400.7	92583.8	112934	117461	86701.5	85958.9	118307	118695	78799.3	69499.5	110662	120572	64193.8	89728.2	126742	98660	92670.4	94297.9	109257	116185	105539	158349	147360	137008	89873.2
O43752	41161.9	35751.7	NA	32841.1	37046.8	64298.6	14864.5	NA	48195.8	38686.1	52155.3	NA	15567.1	59202.6	36115.4	48983.7	67728.8	10218.1	46309.1	57475.1	48727.8	19195.1	40545.7	48022.4	18263.3	39930.5	41115.5	39046.8	30236.1	45975.3	40351.1	45298.2	32108.7	33493.5	34862.1	NA	43075.6	26678.5	67955.6	48412	55897.6	65368.3	63576.5	65438.3	75157.8	112842	101952	86726.8	58907.2
O43759	41831.5	32321.6	74465.8	36264.6	37666.3	42790.9	51419.6	41617.2	34672.1	30972.8	45629.9	64812.7	23327.1	20392.8	33436.2	27433.8	29811.4	32446.1	39238.1	37552.4	46103.1	41140.9	48649.3	39834.7	30356	24228.3	31062	28225.6	27730	31918.1	39649.7	32149.8	27103.4	41883.6	42641.5	55620.4	62480.3	57795.9	64273	48880.4	47169.2	50774.8	57393.1	48999.2	49207.4	85525.2	81808.6	65390.6	46260.4
O43760	134725	138161	186229	144961	131338	161992	153681	170467	148362	128247	178448	139867	178282	192900	179034	183618	174673	175172	228778	271236	176282	189259	210757	203943	96248.8	102352	116366	140612	125372	117234	168897	156474	145928	143312	179383	207035	171652	159417	188981	136132	144160	159430	178745	162095	161675	263850	217538	174293	198787
O43765	170959	139681	175833	192712	164745	230484	161235	154496	217779	138324	254250	151869	130029	200924	176105	168898	172512	113520	205143	170109	133457	146937	153401	204444	121174	159807	181156	192253	128754	116487	190092	167328	115206	82890.5	148372	104840	148606	164512	235326	169195	169693	181512	199583	205171	188016	285307	283749	270711	149932
O43768	128054	113229	173394	142064	111963	174889	147848	140727	182029	142423	232166	221816	123267	184429	169275	156071	145490	144268	178154	162187	146501	185300	167500	213392	87138	120151	151433	143702	89772.9	131478	139883	123986	65461.9	79966.4	107161	86326.6	88801.6	115667	179064	125151	102123	124251	139078	130120	160373	218898	206130	187808	120522
O43772	29753	NA	NA	58239.8	40966.6	57456.3	NA	NA	NA	NA	53592.7	NA	NA	81982.9	69227.1	64323.3	59501.3	NA	94513.5	NA	NA	75656.3	NA	68460.2	29091.3	43202.1	61236.4	49617.5	46100.4	54196.7	62165.6	72171.9	65371.7	NA	75988.6	158625	46729	37140.8	146233	81914.7	34797.2	91938.4	87613.1	128292	38887.5	97333.2	75323.7	61386.1	81397.1
O43776	375593	297272	419009	385403	322316	437952	378149	382171	537512	390096	643680	591100	307112	423685	426068	412401	366345	317376	497867	447244	377024	393278	382163	540001	256559	314553	374952	370649	273530	255997	395287	368282	260606	196809	352320	314130	260362	264784	383726	286681	286403	293797	327475	349670	317105	470042	487388	484404	280115
O43805	110899	111462	152552	136354	102504	178660	157709	163218	167355	113745	166700	157648	123123	144364	138690	141612	111043	109782	152045	156489	146600	154758	107179	191783	78077.9	121331	132552	136675	62393.4	88977.2	89193.3	77206.2	49837.9	61123.2	82614	99380.6	77304	110692	167398	128353	107725	130083	136567	153407	144311	204142	248642	223996	106958
O43808	23086.9	18583.8	26477.2	21296.5	21192.5	28048.8	27675.2	22505.7	29629.7	18906.4	33603.6	28893.8	15305.4	17181.2	25205.4	23610	19178.5	17979.1	31795.3	23927.5	22885.4	16735.6	18485.1	28524.2	11963.3	18684.5	NA	18581.9	16316.6	13012.7	23271.9	24361.4	17209.8	NA	24906.5	25329.4	9688.3	17504.2	26316.5	18452.8	22520.4	16677.8	21013.8	25442.2	16281.3	32702.3	35153.1	30827	19012.1
O43809	266559	193627	311116	289959	219465	332840	298206	265396	323464	255619	394430	386591	204998	302931	287160	275349	230772	223220	349036	280397	236629	283501	261614	353205	177601	215973	275778	292941	192867	205406	309256	299204	178374	165560	273554	261319	199270	245975	347982	252767	222430	238281	283424	275331	283417	410703	421917	403502	235667
O43813	101846	104564	159841	104908	101463	156328	121544	119427	138529	110823	170352	228260	113335	168636	128608	127591	150656	134760	146091	142929	138059	144794	115970	156614	78086.9	94760	96308.6	117023	91601.9	102781	120190	120962	93477.6	81228.1	111119	94278.2	77446.1	92067.6	142188	94087	88663.8	96272.6	105235	122736	111274	164815	161191	161113	107850
O43815	130397	109465	133889	150277	124421	170572	125269	116206	158700	123896	201284	141812	98645.9	164941	165716	153345	139772	118338	182302	149927	122311	118567	135127	190027	89853.7	123185	153289	147812	97696.7	104542	152691	149028	99377.5	74981.3	138326	108013	71687.8	98243.9	154805	101178	99082.2	108910	118490	129320	118572	179519	160215	157367	101930
O43818	84709.9	81557.7	148615	87647.4	78848.1	100115	126731	115693	109667	99556.2	127606	161643	80489.7	91724	89955.4	79735.7	78500.6	76539.5	100506	125750	95838	94994.6	91224.4	97326.9	61470.4	68890.3	91404.6	78239.7	61045.7	69678.5	79225	75858.3	56153.8	64246.4	73895.5	115039	61451.2	68389.7	98694.1	73421.3	66946.1	73249.2	79789	81964.3	73719.2	117913	113758	112009	64675
O43819	15616	18070	14635	20863.2	17811.7	28695.2	31733.1	15371.7	24346.5	22100.2	29976.6	27291.3	16117.9	20897.9	20248.1	20842.6	18518	25967.6	23773	12112.8	24019.7	33252.8	23466.2	23529.1	11891.9	15534.9	19962.8	23658.2	13543.9	19392.8	18992.5	20963.4	15432.5	16110.1	22481.8	17266.5	35024	31980.6	47239.7	29070.9	31727	38401.2	38604.2	37650.3	37784.1	73962.7	61273.9	56972.8	32319.5
O43820	NA	NA	NA	NA	NA	NA	NA	NA	NA	NA	NA	NA	NA	NA	NA	NA	NA	NA	NA	NA	NA	NA	NA	NA	NA	NA	NA	NA	NA	NA	NA	NA	NA	NA	NA	NA	29782.4	12721.8	35760	15115.2	12379.4	28737.3	22476	22929.6	27357.8	87286	41829.1	25897.2	23313.1
O43823	64787.9	63511.8	90063.6	69304	53652.6	82581.6	84490	83401	76395.2	66346.6	88162.5	91124.5	57910.3	83415.9	66536.6	61209.4	63392.3	69379.4	78489.3	82296.6	66988.9	85275.7	76262.5	77439.9	42482.1	56798.7	65766	64365.6	44984.4	61529.4	56760.2	64672.1	39274.2	36024.3	53330.1	56524.8	53292.9	64671.5	96085.4	60683.3	52827.7	68502.7	70320	68257.2	70284.2	115313	97600.6	86120.1	54328
O43824	38216.2	NA	72486.8	38170.6	36590.5	48909	52651.3	73924.4	39518.2	57662.5	53793.3	NA	41044.4	50743.1	42608.3	42836	42891.3	57844.7	56164.1	NA	45975.4	69364.1	NA	58029	25714.5	29261.7	38773.1	37238.3	27670.7	40115.2	39971.7	42739.8	30742.9	27425.6	47146.4	45246.8	36379.1	56823.8	75909.3	45122.6	48533.1	53728.2	54059.8	55230.2	46322.7	91080.7	69472.6	66828.7	53169.5
O43837	81314.8	87824.2	134177	100919	79017.4	113842	105345	112295	116664	102225	142551	146145	85944.3	130309	114236	107974	103268	102956	128835	138501	119649	128749	115510	134427	56302.7	79039.2	93483.8	98256.7	66009.5	80642.3	101607	99051.9	83744.5	75749.6	99156.6	101536	70144.7	73109.9	102987	70105	75250.4	75953.7	80673.3	80145.5	93451.3	133751	130549	122509	84635.2
O43847	99587.3	71680.5	106680	98557.7	81875	126900	99704.9	95016.8	113843	88508.5	134698	93249.5	73441.5	118394	103678	92379.8	92034.6	77792.7	114400	100269	99154	90779.7	95917.7	127648	64260.5	86654.5	97834	100160	70983.7	64090.3	96363.9	94633.2	54664.5	43691.9	81562.8	79818	96823.5	130690	197674	135051	133976	138061	161566	172565	162019	234020	228750	213962	115084
O43852	116899	101050	135461	113202	107549	136199	118671	133957	143745	133138	162347	167039	94156.9	164811	140130	125734	138671	126999	161968	156232	135511	120639	151926	174806	76965.1	95515.8	113978	110820	88876.8	85483.2	101738	115422	89190.2	79218.3	106406	117939	82813.3	132411	167936	126661	115758	129624	144494	148001	155238	220683	222391	202142	131626
O43865	90718.6	93665.5	108741	94379	85432	120460	113072	166833	131090	89306.4	137971	155854	91607.8	123833	100684	88080.4	113965	106137	115425	129996	109627	106060	114707	114519	64917.9	80441.2	95828.3	93299.1	76583.6	91027.2	95699.7	102573	84478.1	65593.1	102403	115241	89547	94708	130230	87276.7	92525.2	101578	109620	108216	99086	167108	148239	148565	96731.4
O43913	80789.1	94993.3	411809	158355	81577.9	149626	149203	205807	151058	118004	205461	151571	64978	119922	128010	139940	128986	101389	135828	188093	65303.6	128543	154111	158348	53912.4	68417.6	116920	152537	70640.4	90475.6	123290	106862	67257.1	71227.4	98851.9	122862	44554.7	54287.2	91291	116738	64595.8	72965.1	103845	81007	80709.5	150847	182437	131244	85446.6
O43914	166655	121272	171778	152268	157256	184440	166728	122500	116228	105613	174327	167657	128721	197848	160543	135879	202201	163677	192603	142380	142291	145346	128317	183487	116035	123306	143977	155657	162348	155803	203203	207563	122096	100899	163659	163044	73431.9	97134.5	160812	77402.2	100537	126226	137899	110918	119875	244880	177332	114403	116244
O43920	76123.7	57750.6	90050.7	83081.5	85090.9	111833	101791	95461.1	87512.6	74756.5	95633.2	130715	62502.2	110987	94852.7	88765.5	108125	93008.6	108552	100041	81986.4	103553	92722	89921.4	58128.3	61429.4	78464.9	74366	75315.2	60677.9	93045.1	95492.2	88146.7	45885	95824.6	84276.7	69496.1	65974.4	77353.2	62424.9	64088.9	66169.2	67353.9	75173.5	67290	112344	88906.7	91890.4	81316.6
O43924	94615.4	65322.5	123639	107484	76949.7	129227	116501	119336	116400	100880	177358	129646	72506.2	124756	121069	115554	104199	103953	154982	NA	88347.5	120944	NA	150517	63026.3	94638.6	103461	96213.2	76678.6	78567.3	107658	124274	76812	66078.6	86388.1	97933.4	70826.8	113025	89863.2	94562.8	95249.8	103087	131402	126403	104945	166687	173871	160092	104787
O43929	65584	53614.3	NA	80004.1	46485.4	93548.4	73191.9	85430.9	77877.4	69361.1	109022	91641	40288.5	69911.1	60049.4	72128.7	59827.7	50759.4	97630.3	107001	61092.2	75559.5	47217.5	94304.6	40651.6	55957.6	81343.5	85623.5	44109	61053.1	71377.6	83958.6	51122.8	60495.2	94690.1	89739.9	64505.1	47816.9	86513.7	54346.7	53301.7	57803.2	63523.8	64133.7	64868.3	97343	98524.6	88332.3	49452.2
O60216	72087.2	68463.7	92493	81527.4	64197.8	92065.6	86150.9	81680.6	99493.3	82156.1	123036	99267.5	76660.1	84594.3	81671.8	79928.1	71995	71132.6	91279.9	85213.1	83943.2	88396.9	84962	100824	50502.4	60848.5	76403.6	81450.7	52709.8	61178.9	77694.4	72684.7	46052.6	48676.8	66483.3	64640.6	49152.4	60178.1	91011.8	67221	56235.2	64116.3	73445.4	72650.3	75436.2	108124	115958	111159	53989.5
O60220	120695	42372.3	168118	131587	112347	152063	128997	160151	142026	98493.7	165794	213629	128869	126817	144959	144351	140092	116741	161282	211676	175220	130933	235250	168988	86504.1	116805	116388	116548	104503	89156.5	122714	122505	100501	73657.5	118692	112228	64473.4	96339.6	108716	94828.9	74384.7	82501.1	102379	115464	93179.7	153904	171819	144641	87757.7
O60231	122188	98509.1	156526	131624	103337	151790	138923	135704	152715	121469	183646	146881	100209	138706	124808	115726	124633	103385	142678	133734	124026	130218	132591	153926	83256.2	98695.9	125234	132634	90769.4	86787.4	123017	126408	85356.5	71034	110747	112131	60807.6	78231.7	128435	76386.2	86912	88940.5	91369.2	99761.4	102859	155630	138321	144080	79566.5
O60232	44529.1	37690.4	NA	48254.6	36678.2	79845.7	105878	NA	61334.2	63887.6	68674.9	NA	72950.8	60770.8	64151.5	58371	37932.5	NA	90998.9	NA	68352.9	74244.4	62569.1	77499.5	22733.7	37391.1	41713.5	54063.1	13188.4	NA	29141	24657.4	16388.9	NA	31051.3	NA	28495.8	24211.1	109503	34568.5	51629	47666.2	48250.6	53844.2	47246.4	90608.2	80987.3	89067.8	44473.8
O60234	306449	271111	448279	341635	290898	372224	335141	350207	345659	277861	444360	476435	262326	408008	345664	322888	346263	280052	355701	396206	242788	309439	331767	361861	237760	277435	342792	344688	270266	281369	353111	331580	275612	229304	309795	308780	261571	288381	376674	243232	301577	292377	302201	300585	306583	424797	379881	347827	287277
O60238	10555.4	NA	NA	18335	NA	NA	NA	NA	12095.2	NA	16505.3	NA	14895.6	24665	21197.7	20240.9	13285.8	NA	18344.6	NA	NA	26266.7	18670.9	22089.8	7147.63	10209.3	14157.5	14769.7	11183.8	21492.1	14122.6	15582.6	8915.18	NA	14159.1	NA	NA	21234.4	43925.5	18780.1	NA	21866.9	28939.9	33109.9	28778.5	1997.97	1376.32	NA	13984.9
O60244	76199.1	55602	93425.1	81300.2	65860.3	78721.6	90793.5	127025	83034.5	76738.4	108612	NA	35515.2	80315.1	79201.5	78987.5	69837.5	55365.7	87287.3	106929	64485.4	87964.1	68376	104501	54777.8	54315	80816.7	90120.8	56542.6	25851.1	81931.9	81250.8	55957.9	56023.2	66263.5	117388	51625.8	65340.2	94314.5	67488.4	69072.8	66282.7	78401.8	72226	76022.2	120458	108112	105299	64492.8
O60256	114585	115398	151051	120787	102897	137358	146450	144685	135618	139237	173785	203305	135003	160294	150063	133564	133844	138724	156057	150414	152355	152859	144797	158416	81856.7	98771	120109	119766	87799.3	113795	130084	119217	90712.5	86572.1	118455	137991	76688.3	88092.7	124859	83116.6	96130.2	95836.1	100827	103934	94923.4	157667	129977	123167	119425
O60262	NA	27861.9	45278.7	44133.8	40879.6	NA	40520.4	NA	NA	32877.2	NA	NA	34851.6	62616.6	57357.1	58422.2	NA	50573.9	73873.9	45986.6	48972.5	NA	51429.6	67080.1	27702.9	35941.5	55025.5	44665.5	50026.4	40445.9	62513.9	71036.6	76345.4	53455	87005.9	66930	101645	38207.8	107306	71744.6	83540.7	110031	87071.5	101792	86110.9	164565	97918.2	105084	99498.8
O60264	108664	95110.6	145688	121164	99735	148704	133355	132813	167643	124289	188018	189473	99267.3	134071	114303	112945	114898	100010	132178	146700	114912	127291	122365	154625	76283.5	104457	122839	126991	78892.5	93466.9	109232	107136	77398.6	72095.1	97432.2	96072.5	86741	108828	166336	108832	105595	112658	125165	126130	147967	203289	210623	203194	97567.6
O60271	55539.3	46278.5	68406.8	61021.6	51270.6	70077.8	69502.4	54805.6	63894.2	55138.1	84283.6	64889.1	51894.2	71520.7	66402.2	61961.8	64730.9	55925.2	80948.5	71456.9	56537.4	68081	64173.2	76306.8	39166.4	45936.9	57366.4	62853.9	44228.8	49160.7	60798.4	58958.3	42171.7	38529.7	54185.5	52169.2	44594.9	47073.8	65205.2	44821.9	44204.1	47404.2	55752.6	52332.9	49739.1	80027.3	73645.8	72000.8	45817.3
O60287	65868.6	57087.8	86119.2	74251.4	67174.5	90220.5	76299.5	82473.4	93331.9	83644.1	105156	104876	62753.9	70645.2	72112.6	64387.6	74327.9	50211.5	82132	84254	75734.5	83208.5	57094.8	84935.5	47447.8	56229.7	62665.2	72293.9	54819	54123.8	63194.3	60460.3	48831.4	35728.3	53649.7	69683	45051.2	54850.2	73778.3	53748.9	60368.9	55777.5	64189.8	65939.1	70262.6	93482.6	97039.7	93074.3	60052.6
O60291	25416.2	32840.7	73101.5	37439.6	22184.4	35262.6	NA	56171.6	40219.3	36669.1	40012.9	73394.4	NA	34254.4	39171.6	33519.7	30759.4	34578.1	39915.7	60981.7	51784.9	61634.9	NA	45995.9	17603.7	28818.6	29577.8	31056.7	21078.4	36154.9	30578.6	26887.5	21852.3	NA	24282.8	NA	17690.7	37409.9	43710.2	29774.4	31690.3	35175.2	36153.9	38685.5	42983.2	60166.6	45127.9	42241.9	28137
O60306	79621.5	66776.2	89904.7	92913.4	76950.8	115632	91864.5	78683.9	112472	83782.9	127194	95103.1	67459.5	96167	87404.7	84217.9	87644	70715	101141	85992.8	84792.8	86473.2	80095.8	108495	57205.7	73070	85752.8	94243.6	63704.7	65548.2	86205.9	76912	62728.2	48739.4	80880.5	72555.1	51243.5	62825.1	97555.7	66702.3	67852.2	70523.1	78283.6	81888.7	83943.5	130847	121580	119134	65361.3
O60307	36345.9	39285.9	82423.8	77421	NA	62019.9	86937.5	86969.1	NA	40873.5	101364	116241	38921.8	87229.6	75338.1	71084.7	52956.3	46021.9	107460	31986	38246.8	76370.3	72637.6	80472.2	NA	43714.1	75154	69611.2	30266.3	NA	70751	71130.9	48640.5	40320	83989.4	70724.1	NA	58181.1	77448.9	59266.3	60855.4	52465.4	74295.6	67144.4	66985.4	116645	103802	73567.9	58522.4
O60313	96395.8	90793.1	139351	111753	91009.3	128833	121952	126458	127717	107836	176455	174275	89715.9	128541	122352	114115	112782	109699	144549	140852	104597	114244	113819	134213	66403.2	86706.2	111550	114203	80439.8	87181.1	119826	113952	94250.4	82789.8	118987	112652	77820.1	87999.7	126621	92291.2	95931.3	100385	110375	111077	109076	162715	154335	142054	104446
O60315	44868.6	36695.1	62536	46885.1	35621.7	55299.7	56435.8	55777.6	52458.5	46506.4	65007.5	57356.2	36253.3	52710.3	45637.3	46189.7	39098.5	42308.5	55483.4	54140.5	50162.2	55424.8	47793.6	62654.7	30613.2	37114.8	47062.4	47554.5	24302.1	33613.1	42152.6	42921.2	26915.4	25596.7	41622.9	47144.2	47269.4	56495.5	81322.9	57423.9	58234.3	59967.4	68969.3	66612.2	69935.9	95183.1	96572.6	89652.3	53559.1
O60318	61311.3	40642.8	57304.6	51700.9	51368.1	64263	54528.8	52513.8	59381.5	42158.7	75982.8	64122.2	41601.6	58673.5	46757.3	41396.4	59646.8	32117.9	58837.8	51357.1	37494.4	37434.3	45381.5	57295.6	32906.3	44319.7	42378.2	47436.7	44973.4	38520	47035.7	52367.4	43750.1	27610	42546.8	48177.8	31801.7	38332.5	60906.7	40003.9	39205.6	47317.1	46409	46322.1	43411.7	68026.9	64622.6	59779.8	37717.5
O60331	49376.3	60589.7	85756.4	54064.4	43870.7	74729.2	57050.4	53083.9	56555.9	39420.8	73869.4	111596	43943.9	62599.8	52242.1	56319.4	55309.1	70354.9	68696.1	62637.5	75647.8	70449.1	57619.4	72502.9	31253.1	45948.7	57257.8	52240.1	38301.9	51705.9	58980	52457.3	47729.5	35848.8	62486.7	73136.5	44802	50039.9	65242.6	44243.7	55566.9	61845	66521.1	64268.5	64855	91583.6	87663.2	77544.4	55560.8
O60341	129861	112711	151339	142075	115304	161804	137975	140375	171063	129787	159462	190664	102360	134288	124263	121367	119500	113810	141679	152126	123157	143484	123345	162220	89388.7	116380	139715	144925	98285.4	108963	133205	131066	86336.7	77381.8	116801	126334	103272	127287	194300	127521	126630	148601	160232	152646	158774	238910	247614	212972	122826
O60343	112088	93352.9	149704	117197	98126	136836	144443	142799	138073	120786	179129	128573	109980	132789	129158	107610	128488	103445	122318	143482	92519	111229	122262	135924	83768.8	93498.3	129834	117014	96894.8	108959	111942	111543	79628.8	112112	103579	137964	NA	62305.4	98448.1	71315.3	81795.8	60646.3	67621.7	132129	74942.9	93704.7	95666.5	119749	NA
O60346	NA	NA	NA	10784.9	NA	NA	NA	NA	NA	NA	21811.7	NA	NA	15595.5	12417.2	11595.7	NA	NA	14880.3	NA	NA	NA	NA	15919.1	NA	NA	NA	12384.5	NA	NA	NA	6098.58	NA	NA	NA	NA	27817.5	12641.7	24322.8	15893.6	12450.6	13907.5	13171.3	19725.9	17416.6	36905.8	32046.7	28847.4	18822.3
O60427	90616.7	74493.8	NA	92198.5	39391	NA	100881	124099	NA	104639	158122	117266	79355.6	86812	103187	98992.2	NA	88342.8	112139	NA	100856	90241.4	108199	138257	55655.9	88892.7	100130	90283.9	46693.2	90492.6	85577.7	97794.3	NA	NA	NA	NA	77632.1	75778.9	82295.9	146485	105064	96252.7	103892	103405	121025	169312	167296	165833	83630.9
O60443	NA	28166.6	NA	27800	36668.1	45772.7	NA	NA	45717.8	39973.3	68628.2	77571.2	76317.8	154411	136264	131334	105543	107400	165346	157710	103088	134383	107486	151583	NA	NA	32080.9	28446.8	23287.8	NA	34127.4	31608.5	22045.5	15168.7	36154.7	29230.5	28159.4	34915.2	52329.4	27099.9	38852.1	47316.9	42970.2	36527.6	47077.2	84312.3	64614.9	50188.4	34047.1
O60449	89361.5	75222.3	116965	99553.4	91272.5	121400	110320	93023.6	112423	85209.2	145225	106342	79529.4	121908	115859	115025	108416	111752	141611	117826	113139	90741.7	102394	140005	60474.6	80501.7	104292	103989	70878.3	89585.3	105351	96887.7	75684.9	64242.1	101778	78188.5	36741.4	56481.8	84895.1	61465.5	53695.4	57321.2	65760.8	68041.2	50946.1	96652.1	92199.6	99116.3	72385.4
O60476	31413.5	27596.5	41305.1	35734.5	38675.2	51079.5	42853.7	63509.8	45473.6	32749.1	54362.7	52195.3	31398.8	NA	36188.4	44387.5	40674.8	40476.4	47691.6	39951.6	95869	69751.3	41802.7	49325.2	26626.4	26511.9	33244.6	41271.3	32381.1	28331.7	NA	38669.6	49733.1	28902.9	NA	103270	15309.3	NA	35704.4	23446.2	22264.4	26398.3	20319.8	26593	27622.9	NA	47677.5	39822.6	25906.1
O60488	134694	108897	160422	149171	109799	152574	114061	120208	147191	105694	217178	168415	119116	218867	182437	159724	140781	119485	186731	148391	131267	131742	142541	191966	97354.7	125909	155159	151284	93210.5	82540.5	130290	127941	82149.8	73558.7	114787	108940	91878	95426.7	115965	88847	80498.1	75803.2	77320.4	82132.3	88855.4	119863	140655	129436	89799.2
O60493	217199	201710	291763	239146	194711	270430	239544	248902	256896	183953	306386	298209	177827	236032	231427	228253	225295	191385	273071	255603	206875	235776	229713	282391	151669	194403	241471	233608	153296	176200	223516	222482	161906	156371	215537	238664	139652	167117	242095	169093	172144	186504	212926	188415	201713	293711	267612	224609	180203
O60496	101959	84283.9	130596	103775	94602.7	114358	86046.4	108104	93634.5	99248	127477	155359	86190.2	143669	117351	106196	130246	113295	143370	130005	99828.9	115911	107410	128771	68816.1	88375	102303	102628	92706.8	87269.8	118574	118500	106658	84588.3	116816	120423	95876.9	101334	118739	82145.5	106093	101948	100460	103199	93357.1	147097	133508	126882	102469
O60499	124804	100388	130434	112702	107066	140305	79905.3	99797.6	138351	115125	149499	150382	129837	177941	128047	146094	137957	119310	168493	111754	129544	121466	119150	163541	96843.6	114848	124664	105353	77324.9	85249.7	122917	120084	66991.3	42525.1	114842	106157	79398.8	69239.1	106828	78464.3	91846.8	72347	82747.2	93563.7	98382.2	175984	135289	154993	79120.9
O60502	124541	108330	NA	107621	98528.1	132743	92123.3	NA	134343	136721	151622	264561	113862	119752	113531	106139	105792	94660.6	103108	150190	115935	NA	NA	113048	83197.3	103859	100917	105756	86215.8	69821.6	107590	101766	77699.7	64997.2	81949.9	129409	80866.6	109608	135223	106717	94864.1	94135.7	114325	118922	85818	153879	147887	150707	87897
O60503	38269	24830.3	NA	31949.6	NA	44888.6	NA	31096.5	45398.5	NA	42748.4	138487	NA	29272.4	NA	NA	33396.2	NA	NA	NA	NA	NA	NA	NA	NA	22376.6	31400	24416.2	NA	25727	27681	33130.9	NA	NA	24641.7	NA	14518.6	21862.2	36045.6	29568.4	32238.3	38617.3	21083.9	24233.6	25676	46304.3	49487.7	61512.9	30931.9
O60504	137879	NA	119202	114455	107740	145388	NA	45332.6	118033	NA	171468	NA	61345	122978	120538	109265	124263	NA	150412	NA	63491.6	93150.1	172013	136600	55590.9	71668.4	45044.3	98643.2	56133.5	36501.4	89924.3	95377.1	48529.3	NA	78465.5	NA	97178.4	49981.3	62433.5	43170.4	83963	118571	119372	132941	110033	237150	174985	136713	113506
O60506	548737	408087	569325	555362	456197	632400	517042	505171	634623	476684	773650	662261	396494	578998	517941	499546	490448	380287	599892	475654	455553	486814	407791	627407	371426	473183	552283	554914	389474	374644	535032	528178	361826	235751	438811	345096	270054	338125	467859	341042	328141	345149	380269	383659	363157	543958	548882	505014	326678
O60508	123770	104607	136547	141970	116472	167014	169235	138400	162801	131389	189861	162155	111415	139460	121364	118963	118719	98021.5	126610	124044	127298	122033	127947	157410	84898.7	113278	132352	135658	87228.4	95877.5	120720	118662	72613.7	66767	90192.6	95382.5	48486.7	72572.1	118157	83981.5	75029.3	76277.3	91858.8	97433.1	95326.3	146602	152373	143362	75698.7
O60524	42889.3	51779	85188.9	52002.9	41904.1	66154	59621.5	54551.9	57010.3	51279.6	87949.1	79015.8	49488.2	61568.3	56277.7	52857.1	50642.6	53823.7	70109.1	76039.8	57697.7	65611.7	58479.7	67188.9	28795.9	45253	50788.3	56117.8	34097.5	42566.2	51032.1	50070.3	40524.8	37541.6	50792.8	66449.6	34038.9	46223.4	64651.8	41416.6	45530.1	47090.7	51148.4	53903.8	57607.8	82818.1	72749.6	73535.2	42722
O60547	51645.2	47347.6	65099.7	51659.9	51408.8	71357.3	57885.1	58750.8	70354.3	56895.8	87840.2	79062.8	68674.3	92200	78289	74846.5	86921.4	73346.4	85440.5	84071.2	77173.1	80675	75230	85891.4	36898.3	50070.9	54309.5	55660.7	42666.1	46463.7	55751.9	56284.8	43788.4	40411.4	61707	60783.4	23122.9	35731.8	52280.4	32073.5	36233.7	36503.1	38722.8	43801.7	44527.1	66509.4	54781.2	51373.3	46619.8
O60563	43039.3	36464.3	74858.8	48850.6	34396.3	69266.2	67700.5	58006.6	54872.1	50412.5	76935.2	67258.9	37130.1	50808.7	43142.7	38838.3	42017	44956.1	50473.3	42402.6	47576.6	69798.5	54532.3	55457.8	22851.8	36590.2	50842.7	46991.4	24079.8	39320.8	34072.4	34338.3	14525.8	NA	27140.6	24228.7	21971.6	33124.4	52553.4	35409.1	31067.1	34598.7	42845.6	41190.4	48941.5	64188	68610.4	60956.2	26674.9
O60566	29215.6	33141	NA	11948.8	NA	47616.5	NA	NA	50669.9	23843	NA	22417.8	NA	NA	NA	11533.8	NA	NA	NA	22099.5	31661.2	NA	NA	23886	24318.8	30721.9	20279.8	22898.3	NA	NA	NA	NA	NA	NA	NA	NA	NA	43441	1764.32	22479.9	50846.8	1053	33648.2	55974.3	NA	6348.36	6647.27	2614.8	NA
O60568	94493.3	73880	107995	99465.5	92278.4	127184	103435	104776	128787	92792.5	161377	134330	59085.4	87386.4	81354.5	69702.8	83530.4	69414.6	89537.7	82192.5	76439.6	77582.7	82242.2	105677	70129.7	79996.2	96830.4	92612.8	72273.5	76155.4	95560	87444.8	66685	53947.1	85205.1	83325.6	44228.1	50810.5	86469.5	50311.7	58340.3	60732.9	67179.3	67949.6	77646.7	127043	113068	110718	53585.5
O60573	49486.6	45356.5	46798.1	54269	44921.6	73003.3	65055.6	57490.1	71227.9	44238.4	89883.3	73914.4	36684.8	74677.2	67948.8	51148.4	54367.3	60407.2	63443.9	29351.3	46928.4	76415.8	63782.9	77000	30699.4	54436.5	66446.8	57401.2	36470.7	42975	55481.5	45293	34307.8	31871.1	37101.4	33769	37541	44130.3	75339.4	44532.7	45334.7	45460.1	53832.1	54901.3	69530	96476.8	94966.1	87709.8	35914.3
O60603	97346.1	73738.2	118385	93010.1	76670.1	108930	92740.7	89800.8	78966.3	66943.1	115995	93983	55496.6	83096.2	71387.4	70694.7	70483.2	70159.9	101351	94947.9	56716.5	84507.2	57359.4	92391.3	64126.9	88336.5	99132.7	88230.7	51005.6	71876.8	89067.7	85049.5	70859.2	54873.6	91360	93293.8	130769	163145	232126	165352	172662	189234	210837	202969	164874	290805	246395	203365	126639
O60610	110726	80701.2	131695	114764	95714.9	131331	109103	108581	120713	107569	157907	140220	69292.3	102492	104460	97813.9	90594.7	88889.1	122379	103267	82085.4	100366	99689.4	117719	76092	92128.7	114292	113636	82884.8	86650.8	114208	105659	73520	63288.6	97317.8	86977.7	95978	107568	156355	101175	104701	115835	122217	113021	118298	173211	167553	148180	79610.3
O60613	46561.8	40942.4	59861.9	49920	56022.7	80801.9	64108.5	58723.2	119118	89551.1	109486	128810	42139	67466.4	49402.8	55087	64386.8	55949.2	61212.3	59366.7	65404.7	81447.7	57270.4	86907.3	30927.4	47703.8	48564.7	44314.3	40789.4	47092.6	57479.6	57663.1	57894.9	46078.8	69559.7	58705.4	79844.5	104318	155092	99542.8	109683	125535	116909	121436	127033	208428	184711	157643	145786
O60645	73864.3	69106.5	120526	86068.6	68923.4	104202	104756	143319	91013.9	82789.4	114750	126872	70418.1	90564.7	88740.2	79640.7	74520	77852.1	108410	174352	93519.7	91373.4	99663.4	102915	54584.7	72974.1	89055.5	90729.9	58890.3	74398	89106.9	85774.6	61908.2	65912.2	84456.2	110437	70454.9	83822.2	116093	84314.5	92724.7	92449.6	101366	102352	92522.8	155967	131975	114952	87696.1
O60664	273202	208255	320009	294588	246014	309416	242783	245115	265672	222666	358421	329735	226009	360076	309622	291629	296081	248560	357423	276985	244747	279084	251677	325138	196642	242554	289263	291171	228771	218096	346531	328200	201900	146198	276534	244200	205458	263969	361695	264849	251146	284197	308720	316159	267200	440132	393850	337627	322219
O60674	NA	NA	NA	NA	NA	NA	NA	NA	NA	NA	25481.7	NA	NA	42370.4	37426.4	36744	38617.8	47527	42201.4	NA	NA	NA	NA	34444	NA	12430	NA	20311.3	NA	NA	NA	NA	17948.4	NA	NA	NA	NA	NA	NA	NA	NA	NA	NA	NA	NA	NA	NA	NA	NA
O60678	71019.3	58128.1	67801.4	85445.6	72279.3	114047	79215.2	104794	119250	97808	121006	105072	62935.4	86888.6	81559.1	72655.9	75726.7	56200.9	82133.1	72905.2	90567	70968	72007	104078	53996.2	59837.1	78834.9	82745.2	49305.6	30496	65650.1	63379.6	43919.7	32328.4	57017.5	55902.9	30729.6	51782.3	97733.7	60973.7	57134.7	64928.8	68235.1	79144.3	86993.7	132728	114688	139292	53489.5
O60684	120925	133723	226895	133361	118559	190279	172127	138245	157838	149957	187886	199641	49808.3	163370	136142	139417	150263	59770.7	185388	107191	99986.8	163778	159144	176974	76311.4	116260	142887	128299	90326.7	132863	118970	104685	90252.8	96226.6	110287	96162.9	122966	141672	212767	136805	148537	150358	198042	161996	167322	282038	281267	244896	134018
O60701	113797	87213.3	127522	113295	109798	142643	114411	103662	115330	92511.4	170633	127857	79323.8	132327	118009	112432	122208	100084	140953	111889	98600.4	104912	102240	139040	80581	103067	122005	123432	96911.9	97375.7	133280	120278	102884	77970.2	123021	106320	77042.9	90860.7	134780	93612.2	99279.1	107196	106971	117749	112657	179117	165035	145614	121921
O60711	32998.5	24124	33380.7	36019.8	36608.6	45459.2	37768	34015.7	31783.4	23240.9	48072	42471.5	45260	88260	66555.4	70311.1	84775.7	55838.4	85438.4	61733.9	44684.1	51976.8	42863.6	70552.7	21736.2	34117.5	38716.8	35675.8	37431.6	37109.8	49611	47835	42589.1	32394.1	47451.3	41921.8	108178	126300	153894	94877.1	127840	136187	135267	123353	94290.6	155588	132469	94629.5	150345
O60739	356868	282120	400464	329626	271633	376604	316695	299814	366232	274062	323952	324396	318305	428183	368366	355347	324940	249098	384337	322222	368185	372781	307907	406690	221778	290008	353554	326343	182644	179496	223312	247452	152898	145337	231552	247159	201411	238723	333912	254830	238430	246366	276968	306896	261117	374255	346384	310491	220324
O60749	109102	97609.5	157181	121777	100055	145839	126585	131325	153950	121557	188513	171797	111136	159931	135056	131555	143593	127434	165654	144126	128475	142411	126647	168624	79338.7	107977	125527	120454	89069.8	112911	128752	124851	88520.3	84960.1	116695	121910	90489.5	104122	154919	104672	97645.6	113889	122495	123067	124806	191626	182856	178122	106385
O60762	139478	109341	183636	153058	132366	194380	151808	157761	174550	142173	228232	191110	114452	183300	168864	158596	155739	131677	198379	186679	137151	160114	165087	215930	104234	120754	140501	158765	115803	113381	157038	153912	137105	92111.9	163430	155923	107207	127038	177111	123564	132298	125863	135441	151966	151494	233051	210935	213541	149195
O60763	112333	90913.2	123387	124993	101163	142752	113469	108924	127167	101409	179333	137194	84576.2	130229	123949	110968	115352	91318.6	139141	125204	94684.8	112265	109159	134779	78807.4	101361	124877	128855	91383.1	93212.8	129655	122716	86360.7	77726.8	122021	104242	72105.6	82069.2	124084	81515.8	78251	90243.5	92754.5	96819.4	91320.9	157725	139888	129582	91490
O60783	43240.3	41001.6	67822.8	50497.9	38290.1	67376.4	56455.3	53934.6	66365.4	60188.7	87726.3	76960.1	53079.9	64524.9	62061.8	58108.7	47517.1	51819.7	72062.1	63878	57013.2	64248.8	57258.7	74096.8	27305.4	38290	51531.2	53100.2	38590.3	38368	53285.1	52763.3	29678.9	29837.2	47149.8	51619.7	33907.8	31480.6	59942.2	32212.4	35562.4	41307.2	43213.4	43579.3	42327.6	75088.4	65716	71387.1	41795.3
O60784	183169	129295	155917	183597	160983	226840	168129	171834	171681	136744	227482	201697	179474	251185	197963	202608	245066	207640	250938	201176	183818	212939	192439	229352	118506	157461	167098	175751	169624	179652	207127	210060	171803	103716	197427	194800	86256.6	131785	188261	120874	120732	165904	163294	148797	160972	288261	217523	195732	181999
O60814;P57053;P58876;P62807;Q5QNW6;Q93079;Q99877;Q99879;Q99880	2.1176e+06	1.49929e+06	2.17935e+06	1975854	1.95555e+06	2.62159e+06	2.5698e+06	2.30692e+06	2.90037e+06	2.24823e+06	3.62809e+06	2.6239e+06	1.59253e+06	2385386	2.38672e+06	2.23686e+06	2162972	1.86661e+06	2.76207e+06	1.63908e+06	1.90455e+06	2.28846e+06	1.84135e+06	2777172	1.59113e+06	1640537	2.24855e+06	1.94511e+06	1.97672e+06	1.74689e+06	2358494	2.1027e+06	1.93411e+06	1.08439e+06	2.52688e+06	1452178	1.73031e+06	2.00199e+06	2.40911e+06	2.14407e+06	1.86814e+06	2.06125e+06	2.06951e+06	1.98636e+06	2349449	2.50167e+06	3141465	2862524	1.58163e+06
O60825	NA	NA	NA	NA	NA	NA	NA	NA	NA	NA	NA	NA	NA	NA	NA	NA	NA	NA	NA	NA	NA	NA	NA	NA	NA	NA	NA	NA	NA	NA	NA	NA	NA	NA	NA	NA	NA	NA	NA	NA	NA	NA	NA	NA	NA	829.901	NA	NA	NA
O60826	73724	72390.7	95920	81501.8	66874.7	96795.4	100187	79547.8	85718.2	85153.5	105007	100610	75038.2	88979.6	81345.2	78888.8	86332.9	77305.1	98752.4	104895	84683.4	85541.9	88704.4	95380.7	49756.9	66079.3	79979.4	77674.8	57274.4	75091	84856	78212.5	65604	59549.9	83089.2	88449	58632.6	68354.8	98197.1	61898.3	68284.9	73184.1	80842.1	79594	81143.5	124125	106074	104681	74570.3
O60828	146999	143485	212144	160804	145501	218582	182135	184861	210403	184438	212290	216323	151048	202268	155135	153051	160454	141647	182241	172123	174444	161069	175983	197802	103689	124015	137197	161739	105197	120537	135747	141085	91777.1	96782.6	104136	144714	112233	126810	216831	141339	135864	140060	171660	171193	184844	246231	236386	222156	126000
O60830	112148	88452	127131	120440	114540	176085	131232	110503	176494	113245	198933	153938	95723.7	161234	131482	141601	121692	106138	146860	123004	139984	135095	122955	169901	67125.5	95183.6	117407	124387	97560	95051.9	130283	132309	119741	61581.5	127158	122117	112522	109555	193156	115667	127469	133462	145550	136092	153438	232924	225256	206532	141670
O60831	744683	678932	1.08446e+06	976410	644395	1.01568e+06	1.02962e+06	1.23355e+06	931657	1.119e+06	1183383	1.30513e+06	569190	828778	904126	882901	608993	910650	965423	1386120	638585	997506	596644	979289	579606	686280	931370	993415	421006	487307	954586	902540	361602	533456	700007	NA	893344	891380	812210	1.00498e+06	742251	852243	1.08061e+06	869064	1.12758e+06	1.18347e+06	1.37882e+06	1.06103e+06	742160
O60832	126280	104876	183236	143468	117120	167819	142370	146769	170476	137573	205257	200480	111113	159868	145370	131198	143360	124136	172494	162917	142437	143006	133618	164238	92703.7	110941	138707	139494	98615.2	106402	136390	130687	105236	82272.2	130574	109175	96959.4	104500	148661	107093	97144.9	104907	125037	126045	122861	199588	188275	185964	112579
O60841	97859.6	82935.4	117214	110138	88594.8	134839	110870	102910	137511	100792	155819	128371	74847.9	111953	102058	99939.4	93122.4	78697.8	120469	100849	95550.5	102074	93171.2	127699	67680.5	91786.8	105707	112177	67960.5	73514.2	98517.3	96896.9	58270.9	50162.8	80738.5	74313	76187.5	89554.6	138145	97522.8	93924.6	101033	112400	111085	117932	174385	168420	170091	82352.2
O60858	112114	NA	NA	133661	113082	135796	141830	NA	156591	150928	208557	NA	NA	160061	NA	140479	129662	124413	217668	NA	NA	144872	NA	161424	88561.7	107032	135186	134359	84706.6	96173.9	154125	123495	90380.8	NA	NA	NA	84182.7	135380	185647	143038	NA	131835	154259	146729	192235	NA	NA	194969	112716
O60861	12146.3	NA	NA	19810.4	17371.6	15381.3	31526.2	NA	17679.9	NA	30175.4	NA	16461.9	26576	35876	26663.2	29422.6	28894.8	38192.7	39919.7	31062.8	28131.2	36706.6	35944.6	7901.47	14471.3	21930.5	20033	13979.9	24774.8	29297.2	23271.6	16715	7427.69	27920.8	39569.7	NA	NA	NA	NA	NA	NA	NA	NA	NA	NA	NA	NA	NA
O60869	138152	58880.8	204220	165943	143645	199300	87170.8	63161.6	193368	67292.9	183933	136791	78593.5	127595	150512	129451	139262	42041.6	175186	179046	53911	72565	103425	176942	92786.1	119302	129861	154176	83375.5	39986	139740	121467	69736.3	51907.4	112818	79515.9	133780	162680	201493	153123	179508	176303	206441	184677	222001	271138	244373	261924	140627
O60870	53218.7	25377.2	NA	54294.6	48089.1	72919.8	NA	NA	78812.3	NA	98214.2	NA	NA	61326.8	61738.5	59558.2	58107	NA	80722.2	NA	35274.2	49710.3	273776	86381.3	33555	50384.4	60968.5	83452	31047.4	NA	68419.1	73860	35622.2	NA	NA	NA	44842.3	18393	27206.8	73435.5	76890.1	27052.2	89129.3	66244	63352.1	94510.2	97669.8	89381.9	47603.1
O60879	89253.8	67577.6	120228	86997.5	73686.5	105163	109326	87844.7	84826.8	79779.1	121100	109908	63232.7	89494.5	86202.2	77741.1	77669.8	78868	104436	96764.2	74624	88759	89442.6	101181	52202.9	71641.1	92369	86537.7	60448.9	65058.7	88964.4	83050.3	67761.9	70643.8	87566.4	94992.7	57025.1	55546	79990.6	59954.7	60154.8	64520	66326.7	67343.2	63053.3	95748	101021	91909.1	53247.5
O60884	70208	52230.9	45997	75036.5	67661.8	91739	57874.1	56253.2	81212.8	55199.4	96824.8	43025.8	57673.6	82484.6	68976.9	59124.1	70528	43546.8	83128	36759.2	46057.7	66881.9	70365.4	74582.9	48957.5	62905.5	76921.9	72884.8	48579	45149.9	73649.2	63906.1	51545.1	35263.4	56900.3	34860.4	77424	77685.6	91956.3	72765	82908.3	81759.1	87485.7	74435.6	91381.6	116533	108519	99640.6	68281.7
O60885	74226.2	57895.2	86317.5	82551.3	67688.1	95247.1	69519.1	76414.1	95047.2	63531.3	120963	100953	57403.7	82402.4	73502.5	73175.3	77124.4	62393.9	85936.7	63436	70072.3	80083.3	66759.3	96605.5	53153.3	65606	77319.8	79242.5	56821.6	60458.2	79863.3	75451.1	48077.4	42994.5	68027.4	68806.6	69538.6	75424.2	108618	77427.9	65921.7	75222.5	87205	85867.5	93261.5	141400	146668	132391	62630.9
O60888	210900	163844	227249	216998	172859	274573	152556	226227	228932	185654	297751	254066	131278	225081	192316	187921	191408	147532	225902	180034	135856	147139	156865	233475	137003	184411	200880	224474	148388	130866	226874	201825	144006	119350	183371	174154	114901	142750	213315	134045	138455	169106	160360	182106	171044	278837	255924	234875	202018
O60907	63865	55318.1	110117	67421.5	57838.6	77282.1	84662.9	65116.8	84548.5	61061.2	102547	87275.4	55574.9	78278.2	77374.6	57184.2	73872	70986.9	82000.8	86938.9	68902.4	79421.7	64864.5	81765.4	42697.9	51991.7	62324.9	65517	47843	55146.3	63981	62082.6	44811.4	36799.2	60166.7	54224.9	49428.2	56781.8	86334.5	60311.9	58829	62529.1	70986	71438.6	68625.3	111715	105347	105113	58076.1
O60925	131734	116019	217705	169350	123407	202424	181441	181244	176710	160638	240619	232847	110764	171310	157590	148172	144013	126664	188914	171845	148813	159480	141266	185347	94539	128702	160460	165205	105780	105400	165258	150598	86253	80320.2	130699	147577	73936.8	101055	149931	111050	96198.7	115565	125890	129365	131964	186352	196369	174501	100950
O60927	65526.5	104681	135092	76176.4	65914.7	92009.1	139837	120273	83918.1	142002	109197	209584	96081	79834.3	75080.5	81612.8	82017.7	131544	84600.3	132604	103924	131895	119876	83624.1	45907.9	58407.9	77855	70211.6	45830.8	110141	70594	59526	36496.7	59709.9	62242	100880	43389.7	57805.1	80338.2	53849.6	48069.4	61950.1	59043.9	61442.4	60739.2	108498	92768.8	100348	49998.8
O60930	NA	NA	NA	10441.6	NA	11520.1	NA	NA	NA	NA	11801.4	NA	NA	NA	7849.36	NA	NA	NA	10668.4	NA	NA	NA	NA	10157.9	NA	8261.11	NA	9482.83	NA	NA	9416.66	NA	NA	NA	8545.56	NA	NA	13550.4	6507.08	12564.9	10715.7	4035.84	30203.5	4218.83	16072	12710.3	10275.5	5777.09	333.186
O60934	97387.4	83496	115605	98535.9	91287.1	125995	117055	115078	112556	102180	146405	138007	95848.8	116168	105647	100770	106573	97770.4	116194	122186	101566	115116	99279.1	127738	66603.4	84439.1	102458	101343	77298.5	88314	101358	100786	81328.6	71132.7	96054.1	106819	66335.4	79079.9	111401	72589.3	76438.6	79260.3	86715.1	83083.4	83505.5	130978	118240	106443	78666.9
O60942	74960	69358.4	84058.8	80395.5	71958.8	97281.2	80696.4	78966.2	98288.9	80554.8	114367	102771	69433.4	89978.8	88834.2	76936.8	75122.3	59055.6	97201.9	78045.2	80845.6	72093.8	76238.3	93718.5	53420.6	67090.4	73988.4	79928.7	61987.5	57228.6	78227.7	74636.3	61172.6	44365.1	79512.8	63146.6	45698.3	47170.6	71791.9	45646.3	47539.6	51168.8	55646.8	57448	53806.5	94775.6	84252.8	70386.9	53941.6
O75027	63140.4	44691.5	94885.5	65920.3	58286.2	83365.8	77355.2	69484.4	82940.2	67303	97463.8	94314.4	44739.8	56833.9	65199.6	55170.4	50246.1	60625.7	64464.2	69081	57835.9	68338.3	73692.5	64663.9	39194	49121.6	64424.8	62744.2	44542.6	51020.2	63183	67614.6	55731.7	55651.1	73967.9	70661.7	21956	34287	50510.6	30668	35375.1	34956.8	36833.9	39982	35532.1	67443.2	53723.1	59788.8	33927.6
O75044	44008.6	41708	67412.7	54820.9	45299.5	61029.5	63466.5	50865.2	62713.6	58587.6	76365.1	69138.5	40972.8	57615.9	53214.6	52734.4	52834.4	52876.2	66954.2	74451.8	45859.5	58831.5	46990.1	64287.9	29975.2	42339.3	51132.1	53236.2	40046.9	44737	58526.8	54755.8	39778.2	32309.9	58833.4	57105.9	45627.5	55288.4	80230.3	55893.1	52621.6	59626.9	64961.8	64094.2	58163.8	93346.8	89064.3	79033.6	68909.1
O75081	80653.8	NA	NA	NA	59663.9	83560.4	NA	NA	88481	39086.8	65039.1	NA	35466.7	62080.4	91970.2	NA	NA	62419.8	NA	NA	NA	NA	NA	82722.8	NA	42283.5	NA	74683.2	NA	NA	NA	67888.5	NA	NA	NA	NA	48514.8	99471.4	77554.9	48088.5	41931.6	47606.4	98285.5	88490.8	117935	164118	150999	125999	90799.1
O75083	289334	197044	290041	293946	254134	329246	256570	250911	303522	220631	365864	299887	227795	368410	311037	291899	303737	240158	352858	254524	238082	250887	223088	324170	204303	246890	277673	283174	228010	203961	308177	313005	234292	181229	286876	227486	246557	296792	385236	299261	292021	317408	334315	327818	315599	463695	432808	381025	314672
O75116	83513.1	66272.9	92765.7	77041.1	67463.7	91241.1	82144.9	79416.8	81566.1	68174.9	94258.3	113868	57075.9	80623.3	68874.1	68531.4	63448	71176.7	76997.7	71596	86542.7	63430.8	77515.5	80693	50148.2	60563.3	74591.2	72288	56248.4	66087.3	72882.7	69985.1	53954.8	57021	68259.4	102985	62132.1	74491.7	99801.8	70232.9	72117	76887	85137.8	84536.2	80695	120306	109164	99627.9	69383.3
O75122	63606.3	61750.8	76961.5	77121.9	57913.8	90839.9	75122.6	78611.1	82405.3	71622.2	114236	87055	102931	124655	115079	108241	103435	87466.1	125026	105943	105392	112445	126603	141949	46110.8	60114.3	75548	78344.2	48022.8	68060.7	79023.7	78670.1	48464.3	54165.9	80294.9	80362.1	29197.6	39016.7	65861.8	43460.9	41085	44096.7	49467.5	48986.1	55668.8	85146	73221.4	67588.8	46558.5
O75127	51499.5	43986.1	87201.7	51021.2	56185.9	85460.4	80722.1	85776.5	93301	69347.2	87200.4	94260.6	41578.4	56883.8	60355.6	52033.4	56585.2	42721.9	78010.7	69554.6	66124	68863.7	65863.7	79082.9	36188.1	43016.4	56962.9	52725	34082.7	29094	45214.5	39366.2	23499.8	18145.4	36840.2	30026	39659.3	40691.6	55895.4	43803.6	60178.9	44961.4	52518.2	61801.1	67236.9	93107	77516.9	83778.6	43443.2
O75131	283560	217148	287111	258615	265010	342674	258675	263758	253749	181615	334856	232452	192605	327954	267230	253405	279112	211764	322544	264862	213080	238630	208312	294213	195184	256467	270707	254362	243194	210290	297967	309421	255281	188188	320476	240532	118788	159410	193379	133571	144016	154155	149331	161894	149058	220234	183942	183366	153494
O75143	38083.5	21769.8	NA	42015.2	37563.2	67015.6	35017.7	57532.7	59268.2	40079.7	60486.3	NA	42846	63896	54787.1	54825	56456.4	33321.1	55316.7	51908	45778.8	50367.8	52035.8	64622.2	27453.3	35836.4	41761.6	45124.9	26399.2	22893.7	45120.6	47783.7	19986.8	26221.4	31941.1	NA	40199.8	63545.6	74707.6	51099.8	56134.9	59492	64611	60972.4	69171.6	106808	88693.2	74782.2	48276.5
O75144	57919.2	54263.2	91391.6	86188.1	63367.9	86826.6	90099.5	70457.6	99322.9	76868.9	98578.6	77995.1	59048.5	73793.4	77739.1	70256.3	74406.9	76275.7	98581.8	109039	67902.4	83439.5	66204.3	79797.3	43809.7	46420.2	74954.6	72698.3	47153.8	40452.2	68538.8	59924.8	37095.9	31837.8	53503.4	50363.1	37315.7	45654.9	69304.1	54112.3	43303.4	53741.3	64319.7	59793.5	54199.2	84424.2	83430.3	70911.2	31385
O75150	37024.2	34654.4	56019	46070	35714.4	57319.9	47759.6	46682.6	53333	43930.7	62431.1	64140	34389.1	49028.8	42374.1	43458.5	42984.8	40896.3	50816.4	51528.3	42110.4	49852.1	48062.9	54588.7	26772.3	38014.2	43159.1	44379.5	27891.3	37266	42769.1	40639	29243.7	27400.6	37216.2	42244	39838.1	44839.1	65430.3	45602.7	41847.4	47184.9	54591.6	52546.5	55213.7	78815.8	85938.6	73512.3	39785.1
O75151	NA	NA	51270.1	60863.4	NA	NA	NA	55607.2	70558.5	52886	67423.9	NA	NA	76837.9	54763.1	38739.8	NA	NA	NA	NA	60323.3	55684.2	NA	71015.7	NA	NA	NA	56304.3	NA	NA	54975.2	NA	53135.3	NA	42973.4	NA	58760.9	10288.4	31657	19479.2	101232	16348.6	23486.6	24331.1	19995.6	46091.4	36548	95046	59978.6
O75152	62661.9	48616.6	75227.5	63687	51590.1	79080.2	62519.5	65506	72196.6	55991.7	91081	86442.4	47414	61444.3	55660.6	55030	52786.4	42070.1	62296.9	63023.1	48764.9	57629.3	62687.9	70341.6	41793.8	55463.9	63830.4	64945.5	44006.4	46604.9	59496.6	57898.9	34869.7	31253	47417.7	45094.1	52669.4	63991.4	93607.7	63833.8	57567.6	63884.2	71219.2	65594.1	83272.5	105174	108102	97897.2	58779.4
O75153	123801	112651	181184	147864	111673	199510	176606	178548	193927	140861	199380	174568	84439.3	107192	110497	102080	94224.2	97468.7	140322	152993	130671	129247	128916	153905	85003.8	120963	144246	151696	61135.8	76102	105910	92530.9	52332.8	52105.7	83611.5	93356	65587.3	78055	145673	94723.4	96511.2	101920	127540	127335	139248	196504	209059	210834	72773.5
O75164	81481.7	NA	NA	NA	91217.6	132586	NA	NA	110342	NA	193217	NA	NA	122240	NA	104612	97598.9	NA	NA	NA	NA	NA	NA	177780	74881.4	92572.4	NA	79911.1	NA	NA	112240	91782.5	75937.1	NA	NA	NA	63713.3	61639.7	131988	53154.3	74895.8	60944.5	NA	77701.7	107025	174422	115458	139335	80133.8
O75165	76502.4	55921.6	85097.1	81828.8	69673	97940.2	83521	75883.3	90683.7	68536	111068	93608.9	60461.2	98824.5	87248.5	83740.4	84384.5	70564.8	101285	81219.8	76027.2	88731.2	76678.2	108944	53745	68414.5	81331.8	84130.7	64153	64638	88611.2	86114.9	65525.2	50069	85669.3	72691.4	53408.6	59802.9	83829.5	59342.4	60455	65250.5	66662.9	73776.3	69574.6	110707	102830	96973.7	66735.8
O75170	47459.9	36218.1	54392.2	47514.5	38219.7	61786	63999.9	47738.8	55555.3	44725.1	74700.1	65643.9	44543.9	52347.9	51610.6	47932.2	52028.7	40935.2	57892.7	63274.9	51430.2	60323.1	49467	59558.5	29051.9	36015.6	38085.3	46484.4	35158.6	35602.8	50174.3	48820.8	39328.9	28337.2	53789.8	48322.5	36095.3	41637.6	48150.7	38093.8	41043.4	40679.4	45574.9	46919.9	42477.4	76728.8	63778.8	57413.2	41083.2
O75175	81263.5	89474.2	103900	96195.1	72241.8	97801.6	114732	105950	95710.5	88634.6	109679	110754	82582.2	97385.9	92181.2	88015.6	74903	93546.2	103393	94670.9	96489.6	93508	90133.8	105772	53945.2	80012.4	92219	85188.8	57231.4	76285.7	86485.5	90459.5	51467.2	56086.5	69045.9	83864.7	74935.6	84517.1	117626	84377.4	86519.1	90222.4	101048	93923.7	100977	138312	136945	124764	94680.1
O75179	44148.7	43307.6	57732.7	51371.8	40723.3	72366.7	67429.2	59004.1	60535.1	49854.2	67683.6	62178.8	40691.2	50448.3	47040.2	42435.1	41088.2	42278.3	60022.9	55911.6	53941	59013.8	50165.3	59641.7	31962.9	42667.9	50679.9	53648.4	25809.8	33253.4	40536	35990.3	23262	21170.2	27805.1	38152.5	24293.2	35759.9	62299.1	39910.5	35802.6	42281	52347.9	50577.1	56760.5	87273	77510.6	72047.8	33344.3
O75190	56881.6	71047.6	NA	64914.6	52526.2	77038.1	NA	NA	59865.5	91287.5	65460.3	250180	47021.7	58997	53896.9	47899.9	53172.9	64584.4	66895.4	76429.1	58250.7	72808.3	84538.1	64498.2	39172	48367.5	58702.8	63535.4	31789.1	49747.3	53579.6	54381	35598.3	68056.3	38236.2	121394	69845.4	58485.4	107543	67374.5	63382.3	76312.1	85152.3	79391.3	86717.7	116009	111731	107944	52545.1
O75191	NA	NA	NA	NA	151539	NA	NA	NA	NA	NA	NA	NA	NA	NA	NA	NA	NA	NA	NA	NA	NA	NA	NA	NA	NA	NA	NA	NA	NA	NA	NA	NA	NA	NA	NA	NA	NA	NA	NA	30886.7	NA	67954.6	NA	NA	80977.4	252961	85304.1	NA	44968.1
O75208	54144	40518.6	49025.1	69422.9	58934.8	89388.1	65256.3	46220	74538.5	51011.2	99785.4	59928.4	53338.5	87387.5	80026.3	73495	69399.6	55144.6	90876.2	54511.4	56266.2	67056.6	54186.1	85059.4	34038.1	52345.1	67572.2	70710.7	52192.7	54267.3	81684.7	74914.8	73365.3	39987.5	91759.5	53752.2	35292	40021.8	70536.9	43640.1	49425.8	49678.5	55049.7	54796.4	58855.1	101977	87085.7	82498.1	59819.9
O75223	198965	154521	191435	198552	163170	237038	189523	177629	236708	159515	287389	248017	185234	297505	233040	234612	239820	185945	268998	238131	211303	238703	210229	262671	131827	182563	192321	200964	142022	150755	199769	194586	128230	119693	171776	151736	115163	139728	193726	153226	108582	160656	173098	171104	157903	213071	240168	229647	150676
O75251	140845	62993.7	176511	183894	166103	242430	104546	168674	217992	103425	244027	167190	109874	242718	220833	206727	201034	92168.3	249579	82282.1	90146	126986	785901	233794	91434	120580	164845	159884	120180	88243.8	177461	164116	137406	425350	172518	327724	139787	119949	200558	129143	132024	154698	168184	156902	171006	277093	260969	229057	185922
O75298	118103	98399.8	138986	100246	93451.1	NA	98459.4	114317	NA	91565.5	97687.7	166866	67250.6	111572	115926	105565	120970	99325.9	159020	109337	149076	101504	NA	118853	56856.1	92438.4	106391	114538	93498.5	89550.2	125706	119906	116584	NA	133759	101747	96847.1	108182	133113	70343.5	113576	119513	92043.6	93768.3	57746.2	163024	144281	91283.7	92250.3
O75306	201550	151503	211919	217167	189896	271636	195586	207119	292740	193508	318344	236767	185798	278936	258240	248615	254487	174970	292259	233360	214291	228315	210541	319762	145094	173402	195930	215631	174970	161859	240793	236896	190641	137236	217651	193121	131527	140130	198462	138798	155017	149627	158872	167852	169382	265471	248963	251248	178720
O75312	77906.8	69887.7	123090	94119.7	70809.8	112211	100575	102396	117120	94346.8	130416	123021	71410.8	99024.6	92738	86222	85812.9	80255.2	101130	94255	81932.8	94722.7	84047	110314	58635.1	77766.6	90057.9	93525	54302.3	65206	80146.8	75251.2	39256	40423.3	57917.6	59370	55948.4	73839.2	117332	83267.1	74792.2	81532.9	91327.2	99729.2	92599.8	136482	140608	136160	71727.8
O75323	173205	164217	248166	176567	177816	221472	136726	124958	204715	180955	228142	300851	110561	233103	216505	195735	216425	203300	237241	114977	136319	123133	234574	195971	125392	149664	171047	166458	154291	86535.1	175720	177334	179404	183389	195948	301682	152697	148039	208977	142521	169164	166732	151018	182359	172064	253938	239040	191406	229542
O75330	33045	50624.3	NA	67212.5	16245.7	65119.4	52987.8	NA	55280	NA	NA	NA	NA	NA	NA	64264.2	NA	NA	77649.8	NA	44919	NA	NA	75653.2	14467.4	46212	80217.5	48966.6	NA	NA	NA	NA	30402.4	NA	NA	NA	NA	28833.4	59811.5	27894.9	28089.8	27968.5	27463.3	32271.2	41444.2	61592.4	47780.8	50695.5	30431.9
O75340	132712	103736	191471	153431	119013	174132	147824	163483	173708	138632	229820	188070	97672.8	185738	162764	145936	159021	99193	183283	163835	125047	140469	132848	185540	87803.3	130992	166019	152013	95805.4	111724	154349	147624	110218	85417.4	146117	79523.8	137518	172259	259660	157681	180204	174268	208122	195387	197917	316990	273215	248420	185729
O75347	67536.9	65529.6	110365	85344	69950.8	112049	93377.8	92761.7	113268	101165	134100	136354	53944.8	78643	70687.1	64641.3	61367.7	62139.3	82808.3	99253.7	74149.4	84560.8	81902.6	90520.9	52912.7	64121.5	82149.5	82241	51322.9	56985.9	74719	68752.9	40119.4	42220	60576.1	67170.6	62023.7	80429.6	122990	85335	69348.9	83173.4	99625.7	101260	105196	160521	149027	154063	73802.8
O75348	484541	313056	403405	442034	426831	538875	361302	372599	498176	286831	683960	407136	475510	802804	573608	528061	630724	451308	748006	487533	513177	426822	495419	713872	315200	428827	455126	467355	369534	299858	475347	510117	391151	315028	540598	494513	362200	360467	502850	312378	406985	401617	436812	425711	378082	737084	517576	439965	511379
O75351	84213	80018.8	116155	97398.7	76890.6	121543	101668	95724.6	99886.8	81488.7	133090	127339	79918.4	117954	105638	97866.8	104144	91285.9	122240	115419	101012	104018	91549.4	122497	58451.2	80133.5	88709	98477.1	66999.8	76960.6	93434.8	92813.4	69236.7	53449.5	88775.7	95541.3	62932.9	84274.2	119227	80835.7	73225.2	86394.8	94764	93505.2	97498.9	159192	140121	117954	89252.6
O75352	67143	48323	48076.4	60129.6	71127.7	82308.9	46612.6	42284.8	92000.2	54730.7	86387.4	53351.7	62420.4	90837.1	66890	55363.1	89342.5	50680.6	70462.9	53299.6	63030.8	62657.2	62007.6	74029.4	50950.5	56114.9	48165.6	55542.4	66369.1	35662.5	62083.7	63213.1	61071.4	33880	56067	45098.1	55393.8	55288.5	75568.4	45444.4	61680.9	55508	60034.6	69723.2	70470.7	120147	80660.2	85865.6	54528.3
O75362	16951.5	16342	20321.8	22442.8	14566.5	24131.7	30137	31658	29473.5	28135.8	29386.1	29895.9	15793.6	19758.5	15557.7	17217.6	18271.1	21746.6	22716.9	17888.5	22448.4	25419.4	10998.4	28320.1	9772.2	15102.2	19295	19152.3	7817.92	10409.3	18621.2	17612.3	8935.38	NA	17384.5	25623.8	17991.5	24832.9	40044.6	22012.2	25200	28971.8	31610.1	32279.1	41696.9	57965.6	54289.6	52130.9	27195
O75365	NA	NA	NA	105195	NA	NA	103358	NA	76184.8	NA	198433	NA	NA	150404	135245	132259	102861	NA	108227	NA	NA	105151	NA	151550	NA	NA	90376.1	99098.2	NA	129011	100700	111840	92327.2	NA	111510	NA	26699.3	72510.1	133145	47431.4	74555.9	91078.7	69437.9	NA	57582.7	141088	145229	NA	88002.7
O75367	347882	257026	420135	343379	304132	390721	331670	320928	330576	298919	471726	461925	310457	475508	403340	358418	407380	368237	482234	417166	311960	384838	326254	417977	242139	288708	341472	334703	306218	296344	421094	398994	365807	274116	423025	441504	317604	324637	401311	266197	286185	322744	317222	316235	309623	457693	405179	356813	316414
O75368	271999	199383	278407	288334	257175	347102	269009	239455	251687	205834	323941	269018	230399	390622	346484	315830	322568	278561	368709	272985	272135	306772	260596	337013	201588	242660	283542	280381	236186	221506	344511	331710	277265	177275	346838	299288	188133	260855	367408	241982	233241	276325	285724	288893	269582	446556	376980	341097	327390
O75369	126118	103585	161666	142925	130141	159656	147906	139891	155678	125938	230220	179739	154043	235171	220792	217477	203801	170221	250490	230707	178393	190504	209010	262058	91371.3	110770	141119	141438	110433	105988	149338	143356	109217	93817.7	146236	145424	48442.8	66219.7	95223.5	75825.8	59222.3	71958.9	86689.6	101953	72642.2	132860	121222	132120	117902
O75376	80974.9	69389.1	106867	93493.7	73293.1	100873	96018.6	89038	94093.5	80549	128143	121857	69388.1	100753	95241.5	90061.2	88593	78153.5	107521	95650.2	88500.6	91740	89464.1	107293	53427.2	70024.9	88845.3	94285.1	62676.7	74311.2	86976.7	86056.7	56678.8	52303	76037.5	59101.4	57185.3	73047.6	109172	78314.9	63607.1	72357.8	84143.4	84837.1	74396	118492	123375	107365	66376.7
O75380	60101.1	52319.2	68672.3	61090	63649.1	75989.1	63104.7	62005.6	66211.7	55657.7	63250.8	92742.3	65765.7	85203.6	69789.7	66789.9	78061.6	62091.1	81317.9	95837.4	65944.1	73527.8	48239.8	73825.7	47883.6	51877.2	61242.9	56283.4	58366.1	53505.8	67021.1	65748.2	61498.4	41745.4	68976.6	35184.8	59447.5	48377.1	61573.4	47129.7	51395.4	46905.8	56096.2	51711.2	54853	75774.4	67668.9	68443.8	68621.5
O75381	75442	57432	85123.9	80711.8	64166.5	88684.8	70266.3	79233.2	81194.2	69862	105498	70673.9	64124.1	80196.3	80128.7	75856.6	70771.5	75621	91778.7	87246.7	71781	76426.4	83239.3	83844.2	51303.2	62063.7	73377.3	72662.9	63338.3	64977.8	83555.2	84805.1	65921.8	61794.8	79055.1	82949.1	37542.8	36473.8	57880.8	43329.9	41101.3	45159.1	48235.9	47148.7	47649.7	73853.2	65600.5	60481.8	47297.9
O75387	23647.2	28773.4	139836	24545.6	22674.3	42369.5	85275.4	94961.4	55434.3	33667.3	47758.4	128174	NA	23799.7	NA	19032.2	25792.2	48648.1	29120.3	116780	31080.8	NA	NA	36799.1	16446.4	19475	33736.1	22016.8	14149	NA	28875.7	34953.3	NA	NA	19946.8	NA	15739	23489.2	48540	31105.3	27531.1	28319.4	28146.7	33348.1	39852.7	64715.7	49215.7	57742.2	21354.5
O75390	245635	196076	289442	266216	243213	338072	247443	259692	327223	239569	408596	354588	231394	361162	326298	310805	336141	271416	377978	356539	270139	326160	304962	376537	179284	221700	259482	271948	225917	212712	297273	306066	288222	209716	324383	271637	229933	231708	334271	227910	241358	247437	279222	261609	296213	446039	392945	366088	299476
O75391	88051.3	80025.6	102989	95223.3	89174.1	111219	98346	102982	106870	84670.6	108147	91474.9	66187.4	89223.8	77193.9	84341.5	81292.4	66419.8	95988.1	82877.2	79330.6	78506.5	75220.3	108001	57958.6	73787.2	83551.4	99398	59485	70397.9	76470.5	80001.4	43802.2	29267.5	58952.3	56649	82895.5	88060.7	127758	88065.4	78081.9	91113.6	102832	106851	110301	162516	144915	141611	78483
O75394	101569	68574.7	114029	114329	97939.8	145464	112490	111133	150201	92615.7	200719	122082	71139.4	142562	129877	111739	112667	84333.1	144617	99706.6	100584	112943	116130	146891	67993.3	92236.8	183857	104088	63620.8	63642.8	129391	121333	60966.4	41934.9	109797	68120.2	87117	106226	141172	113504	104303	110105	143212	136711	129650	194310	170448	162833	112920
O75396	117834	102972	170358	139359	114132	163876	157662	132789	143495	129257	201220	164282	114950	173078	151433	138478	140151	124313	184537	169824	139660	167983	151032	176098	84200	108260	133003	140437	106365	109972	144644	140635	105204	92753.4	144363	147620	91379.8	106268	160799	112461	103204	120770	120508	125066	127751	216454	183539	167713	134308
O75400	104220	89175.6	145502	119392	98976.7	150260	129443	135634	139440	126426	176861	178707	99825.6	139114	119657	115889	116057	111331	140766	165877	121396	135648	118229	146667	76972.1	97169.1	118945	117889	89778.6	90263.7	114346	114577	83101.2	71117.2	105005	112520	85303	97922.2	156921	103193	93564.7	113084	127676	126924	124277	199925	195247	177443	104095
O75410	61305.3	55373.3	88630.8	74706.6	63764.9	97013.9	91420.7	88357.8	80055.9	66621.4	98294.5	88147.2	63414.3	87219.5	76475.3	74300.7	81416.1	75737.3	100983	99023.9	82299.7	94349.2	90301.8	96233.8	40128.5	52728.1	70830.1	69011.3	41554	64930.2	71745.9	69374.1	39522.4	46885.9	69975.6	69416.3	34759	40345.6	67133.8	41043.4	45080.6	56575.6	62601.7	59763.7	57743.9	98330.4	81540.3	67392.7	47720.4
O75419	45081.2	29340.2	NA	31453.8	62157.3	95053.6	16317.5	NA	75315.4	27384.3	73220.4	NA	22759.8	69626.6	29739.9	33576.8	59282.9	NA	34071.7	NA	46565.6	22903.7	NA	41815.8	39707.3	42801.1	29640.9	29841.2	49260.3	18723.2	31914.1	35293.1	NA	NA	NA	NA	19628.8	81246.2	35757.1	5751.14	5875.6	86156.5	29975.4	63644.8	61570.6	117924	72321.4	93801.2	38713.9
O75427	115528	96017.8	128788	124267	105680	138166	124515	120255	139335	115261	177231	157256	104718	158924	141526	133296	134336	123849	163368	135641	124421	130170	133604	166616	83447.4	109275	119174	116807	91210.4	98290.3	129093	118950	92897.8	76939.6	109304	109329	98326.2	109641	166328	109290	112741	129602	134220	138678	121148	170732	176757	157880	95767.6
O75431	71826.7	74791	178265	88371.2	74979	115321	105419	94923.9	111549	90878.4	138122	166702	67713.4	100320	87475.7	88933.3	92224.4	82893.7	118972	87196.3	77497.5	89365.5	69296.9	116643	56456.4	77541.1	81877.3	100123	71809.6	83314.1	91986.2	80560.1	89425.5	60293.7	89031.7	104955	75649.4	64852.2	98256.1	54679.2	60437.1	71840.8	63419.1	72437.9	68682.1	125413	102646	101955	61474.2
O75436	203129	165275	210390	201965	176965	235328	222484	216361	206884	204468	261518	224409	178806	228261	198933	193843	205345	182311	238939	199042	195443	207619	214006	248982	138785	170934	195958	203882	156051	170949	215456	209550	161017	143786	211108	191670	175194	193510	259940	190425	175566	204723	217065	212509	211376	308014	318983	270844	191814
O75438	118525	121254	226919	184342	160675	223520	207142	195774	205928	165252	207446	114608	149533	163003	222842	200888	94472.8	109226	289874	266679	204116	177476	238907	253624	107295	61729.3	90703.1	198904	146280	68020.1	234412	204659	176919	66688.2	249314	324916	106612	103153	146692	142219	139774	137389	142856	158906	130660	238886	222501	180835	187602
O75439	116140	105411	157325	135339	103711	162139	150941	136280	152630	128072	204430	192230	108608	146603	125018	125767	129459	120165	152894	148172	121590	137454	130794	160813	74540.6	105285	122324	121987	97420.6	110515	132028	129278	104642	95764.5	123416	122396	81010.6	86571.4	131492	81426.9	92585.7	93728.7	103327	105689	113635	168650	147756	145691	90969.6
O75446	94134.9	40428.9	61490.4	144990	42063.9	134468	79847.4	58690.7	102076	53802.2	220582	62886	32576.5	142834	167335	176922	82632.8	55330.2	201612	46359.5	52262.1	70331.6	48891.4	209942	27535	105585	153893	173874	81676.3	53176.1	147627	158327	92646.1	35240	156500	NA	46070.8	102324	170211	111284	107559	115224	121876	139195	127898	205910	192128	186771	102521
O75448	67225.3	57588.2	75221.4	72530.3	63164.7	94539.7	84776.4	74204.2	79486.9	76018.9	118433	68886.3	59900.8	83161.3	73444.2	69205.5	67500.9	77624.3	103088	98572	75402	84757	62540.5	95569.9	45979.1	54912.2	74388.9	80957.4	54540.7	94189.7	84160.7	79855	51993.1	42847	63642	64605.9	45336.9	59314.2	95545.4	51935.2	67298.7	70379.6	69730	70151.4	68073.3	126988	110173	104394	63120.6
O75449	38278.5	44182.2	101087	54763.1	43005.5	75730	70473.6	77497.9	77605.9	55107.9	103167	95956.8	43062.4	55631	59355.2	46722.1	43166.1	38317.7	59429.6	77790.7	42451.1	61921.2	66119.9	71681.7	28827.2	39762.1	53856.3	47198.2	31620.4	36496.6	44823	37474.6	24510.5	26616.1	47945.4	41487.5	22217.3	30420.1	53611.4	28373.9	33669.5	37238.7	52232.6	43168.4	56679.5	81367.6	72685.9	76345.9	37617
O75475	62080.9	54287.8	85605.4	73436	57982.9	83486.1	71400	75496.8	107966	80609.1	135953	117424	60287.9	84704.9	77767.2	72484.3	67359.6	55367.4	80217.7	84296.6	72222.5	70084.2	76290.7	98973.1	45765.9	53823.4	56840	68487.6	47156	44425.4	61257.8	61775.1	30820.7	26252.5	45883.1	42479.7	92923.4	94756.6	140562	91632.6	80311	95497.3	97924	103967	129218	187545	191066	186256	70111.2
O75477	182722	145644	286877	201215	178692	246290	176325	222065	235335	186501	268457	332532	116984	192210	176297	147669	201849	170980	203414	183178	164483	180445	182219	216357	128815	173750	220827	204929	157228	145573	222676	203040	198764	226827	265440	299238	102942	106781	150998	117517	117084	113097	132233	136979	130362	224392	188619	165089	146130
O75489	180099	134519	195598	207217	182755	255713	176598	179718	275415	180633	317000	230818	164394	287537	261720	240989	243858	178506	296917	204792	199661	219011	211310	315242	134709	168590	201158	208790	177655	142008	232295	225381	175479	132479	228483	188508	134044	137706	187355	127713	163756	147558	150332	161420	170785	281121	232649	232625	178389
O75494	87735.9	81017	122712	108123	84046.1	134891	119845	119460	129924	101995	170534	154915	81317.8	117211	104916	97470.3	107203	96779.5	117043	110167	103668	123230	95758.3	138679	64421.1	90891.4	107452	110265	67993.2	100622	88724.2	86670.9	59127.3	57457	82677.1	88487.8	86051.5	82072.9	150054	92048.6	75966.2	89623.3	109728	104222	117366	176834	184823	173705	78626.9
O75496	27291.1	30037.4	139844	40296.2	20884.7	55249.3	55073.1	81233.6	36195	35496.1	43243.7	NA	NA	17454	24211.5	12992.5	NA	NA	26227.3	NA	52582	37967.8	48895	29444.1	13507.3	30783.1	36065	36806.9	NA	NA	NA	NA	NA	NA	NA	NA	NA	12878.2	8416.12	25649.7	4580.88	37906.6	6572.98	38523.7	46016.1	98921.1	67152.4	67223.4	NA
O75506	110357	115292	145827	113713	112489	128996	150395	106133	132221	134479	135152	139607	97274.3	126004	112814	112855	115773	102394	125844	130331	104731	128508	105509	116225	71700.4	98008.3	117957	100573	57965.4	98962.3	69481.2	77977.3	52301	51686.5	91370.2	243350	127273	86493.5	141790	107410	109534	123840	138130	153567	147156	177357	159368	180493	88067.4
O75529	62972.4	187101	78524.6	90432.5	61211.2	76908.8	190526	130984	94207.1	224046	166851	131524	183208	59322.3	52929.8	51347.3	79515.8	149777	63994.1	72536.5	151798	208259	113755	115413	44823.4	47881.4	97075.5	85054.8	22985.2	171668	49739.1	65383.1	38363.7	135783	58641.3	97228.4	59791.1	41547.1	46246.9	50715.4	31758.3	41365.7	64541.7	49798.7	49039.6	89835.6	93121.5	68833.1	36140.9
O75530	82748.1	36577.2	104009	86459.1	67537.3	110204	53981.9	47050.4	109121	32299.1	123348	124252	58864.3	82716.3	70428.2	68707.5	74414.2	63357.1	91591	31443.7	42555.4	42492.1	24803.8	84890.8	54965.9	62075.1	73623.7	88392.4	52760	32303.5	75882.5	74124.8	53108.7	42167	68541.3	76778.5	64626.1	68717.9	105889	67438.9	68252.4	64622.1	78447.3	76972.1	84876.1	125067	123408	124064	56598.3
O75531	97015.6	127122	152671	109546	96416	147140	134378	122525	125462	115162	204050	190617	102512	147395	121518	100181	120862	164678	136165	123380	123886	139590	155832	151304	71447.7	95732.4	133864	111075	77886.4	99906.4	114018	100275	70522.8	97763.8	107080	100460	103465	93865.8	163539	117475	109507	117841	126754	114744	147381	180621	207279	205672	112557
O75533	92132	78960.2	120457	102218	83971.9	125306	108157	104109	123724	95990.9	149453	127752	80933.6	113367	104789	97266.5	98168.3	88183.7	121282	111069	96109.9	102706	96026.6	123930	65502.4	78722.5	96607.3	100779	74966.5	76340.5	100263	99445.3	70827.9	61519.2	91567.3	96096.2	69791.4	85716.9	130452	89977.2	81489.9	94235.5	108045	106752	109310	157352	158994	145712	88925.5
O75534	148760	138619	213539	171983	134637	219896	209758	220877	196444	146344	206066	180786	118691	153320	143192	137581	129144	128339	174477	207776	163628	181813	164546	184804	105261	137876	168250	169236	80918.1	107073	125790	118752	80749.9	78790.4	106731	133698	96021.5	110315	164873	119886	116170	123979	146970	140461	162028	227974	213529	193821	104177
O75558	13008.3	NA	NA	19523.4	9330.84	16687.3	NA	NA	13959.1	NA	25159.1	NA	NA	18213.9	23174.7	15528.4	17409.5	9537.15	26761.3	NA	NA	NA	NA	21586.8	7893.98	NA	19809.2	15316	10987.4	NA	21753.9	16385.9	11405.8	NA	18106.2	7897.24	NA	NA	NA	29893.7	NA	NA	NA	NA	NA	25566	25358.7	24420.2	8381.28
O75563	38218.7	84314.2	NA	45579.9	37828.2	47003.9	NA	NA	NA	NA	44040.5	NA	NA	NA	36613.8	38037.3	NA	NA	51548.8	NA	NA	NA	NA	48575.9	22531.8	34928.7	50408.1	38938.2	27911.9	NA	38460.1	45819.7	40209.6	NA	58641	NA	24637.2	20677.2	91273.1	39208.8	41672	48246.8	25781.5	25506.4	27652.5	34057.4	92156.6	88487.7	42331.8
O75569	92889.9	80682.9	118301	91403.7	88453	129076	95013.6	104417	101093	86997.7	137350	122558	68840.3	103412	84406.2	88286	86140.9	92494.6	122013	100544	97203.6	90251.1	83593.7	114675	63406.4	79742.5	85624.2	82381.5	79851.8	79964.8	94371.5	87323.8	71464.2	69237.9	89600.9	91492.4	115621	121869	186763	119441	121478	128486	146644	147014	141376	240332	208918	174419	159928
O75582	95691.5	61670.2	105858	103568	80482.2	101982	108546	106569	119117	93198	137147	130430	57227.9	125180	92921	96500.8	87812.4	89732.3	130395	114653	57240.5	99906.5	100441	137302	55522	80719.5	85603.6	92257.1	65585.9	65821.1	100997	103218	76278.7	61783.7	89411.6	89808.5	91272	95663.6	134558	101371	94777.6	98807.2	106534	138843	98364.5	152223	172396	181019	103597
O75592	62601.6	52146.2	70103.1	65304.1	55250.1	79084.3	67093.5	63511.2	78412.8	63536.9	100950	82206.7	46620.5	59956.9	55559.1	48750.3	55564.7	48311.7	63022.2	52932.6	49253.2	60696.3	60192.9	67699.3	41310.9	51869.9	66215.9	66012.9	45354.1	48741.1	63621.8	58045.1	44763.8	37135.8	58235.8	58834	33413.7	38373.6	64043.6	36255.1	40780.3	44730.4	45266.4	45267.6	46376.5	77127.8	60089.3	62326.8	41600.5
O75600	40214	NA	NA	44966.8	23209.5	60908.8	56174.9	NA	55787.8	NA	72588.8	72499.2	34546	57256.4	51498	44264.7	66942.7	NA	52091.2	NA	39518.1	35214.6	41488.8	60555.4	31020.8	37655.5	36785	46973.8	18935.9	NA	31416.9	32146.6	36959.5	NA	NA	NA	50736.7	32700	69822.9	42026.6	48395.5	51298.3	58144.7	55218.6	59243.2	98564.3	88693.2	89705.9	67238.3
O75607	167417	109538	146050	187066	150552	227875	149971	153865	224659	134955	276304	189570	112876	150938	154023	136098	158735	107446	175550	157956	112840	129642	147378	169906	107570	137301	162289	181864	120468	112461	173417	138632	118102	72778.8	140424	89536.5	90561.2	106022	183480	120907	115355	131523	150163	146545	130494	216645	226029	231265	110660
O75608	142246	111657	203980	133246	140033	183042	166408	162135	170393	145374	201469	221194	129613	180402	167431	141055	171949	154058	185135	166257	142986	167884	151341	171636	100964	129699	154256	147614	121161	122296	163103	149917	118281	117301	145775	171197	72361.5	73208.1	108441	63991.6	68399.2	79350.8	84279.9	87242.1	80175.6	124194	114349	99728	93922.6
O75616	41634	27874.6	NA	52979.6	43365.8	69472.8	47749.8	NA	71132.1	41511.1	87884.7	NA	30409.7	51571.3	44139.1	43794	44786.2	NA	59595.8	NA	39438.4	NA	53548.4	72228.5	25002.6	44439.6	51835.1	57522.9	27623.4	38655	46650.4	43694.8	5775.9	NA	29901.6	NA	22102.6	21670.3	73716.6	35861.9	35345.5	39640	45233	41658	46391.5	85369.8	64378.4	66045.6	28652.4
O75629	72249	NA	NA	87470.9	77489.1	152030	59300.6	NA	136576	NA	157415	NA	23249.1	164966	125843	109662	158396	18562.4	121053	NA	46935.9	39011	NA	155505	54488.5	91295.4	64188.1	77799.7	78034.1	NA	104309	102296	73051.5	NA	98051.6	NA	83483	101053	206174	188556	111489	156265	194064	128028	216301	334887	289628	275083	166833
O75643	148968	115271	171489	167346	131980	189342	152339	158204	184648	137464	220532	173008	109141	155816	147803	141821	138756	110816	167401	155310	133269	140214	134322	177077	102309	128796	152985	168502	112741	108095	160830	151386	104965	89290.2	143359	137083	102949	119177	175192	124796	119509	127131	144969	149846	146229	215382	216324	207673	113417
O75663	100398	73968.6	144268	98982	86177.8	124547	104341	123692	123519	98560.7	154649	165629	64218.4	94320.1	93170.1	87138.3	85748.6	92287.5	104607	125563	80433.4	108647	93172.5	120629	66024.8	74965.5	95529.4	93869.9	73500.3	71110.7	99649.6	93474.7	64098.9	44824.2	86943.1	88278.6	76327.6	80524.8	123365	86216.8	77998.6	94431.9	106728	100770	93726.7	166142	150179	142684	83107.4
O75676	46176.9	41871.5	53011	44584.3	44781.7	65070.8	51046	52159.4	63659	50676.3	74523.4	66497.3	60842.4	71077.2	60898	59230.6	63488.8	56667.2	71806.9	77062.1	61136.1	66280.9	60452.6	76010.3	27624.3	39600.1	41742.2	49520.3	35897.2	40317.4	46283.7	47379.2	36167.8	32050.6	43519.7	45960.3	45314	49946.9	78020.2	51967.8	49711.4	54524.8	58897.1	72593.2	60438.2	88025.1	83679.3	94518	47676.4
O75683	41743	45480.4	85261.8	50026.1	40800.3	64716.1	43768.9	73022.4	57977.6	54846.7	75842.5	33012.1	37197.8	49790.4	49416.3	50548.6	42486.6	44120	56786.6	74192.5	50151.6	53795.8	54809.8	49825.1	30829	41367.9	52946	45922.5	26576.2	39654	44234.8	40048.7	29089.8	24379.8	36812.5	20010.9	29911.6	29344.4	41262.5	36070.8	29852.2	32730.6	41629.6	40374.6	36742.8	50280.1	47836.5	52255.1	28092.4
O75688	75740.6	58553.9	84599.9	95074.3	72250.5	103892	84130.5	75270.5	135071	77574.2	137446	86945.2	66663.7	118348	99086.4	97287.6	98001.9	68914.5	111219	88716.9	69824.6	75401.9	66980.1	121638	52288	73092.4	83621.9	96839.4	71728.9	59908.6	94452	99029.3	70554.8	54646	75106	79018.1	73010.6	74085	100733	75664.2	75696.1	80013.9	82643.8	85777.1	83373.8	127606	120032	118581	74534.9
O75689	102834	94962.1	161202	105596	109712	142148	66533	105287	138125	104810	169708	156899	110021	164166	105811	158594	133531	162018	181211	162634	151424	148685	127246	170663	67632.2	77078.1	112087	109967	92453.9	101944	118142	123001	107844	107827	135129	140799	86791.7	84571.4	114803	90261.4	96311.8	89872.3	114849	100101	96943.3	153783	126127	121930	108501
O75691	97483.3	83973.5	124813	105857	88483.1	134939	103692	114213	135932	109955	148309	144417	77905.2	106862	100582	94946.8	97617.2	81975.7	114086	98542.1	93503.3	106341	94026.2	115549	65143.6	89792.2	112698	104326	72407.8	71664.8	99431.2	96029.6	70694.9	61120.9	94605.2	89099.2	53731.8	54604.4	84648.2	57331.9	59364.5	58458.6	66095.4	72284.1	71079.8	113911	102725	99536.6	60693.3
O75694	115621	97342.9	136006	124469	111514	155533	131052	126391	144045	114190	168812	140800	85580.5	121044	108390	106947	112109	89377.4	129203	118152	106640	118162	108501	132104	83757.3	103778	119345	122918	95990.6	95723.8	123348	123153	105354	81882.1	116831	112939	80248.4	88789.9	126394	91309.3	92947.7	90447.4	103352	108277	115708	163768	159285	156447	80240.9
O75695	212784	158085	275343	215858	171716	233391	197970	304256	220834	245029	284761	377683	150717	247231	223903	199726	219645	198037	271049	340706	187040	252163	209117	243226	134854	169259	207053	205244	153378	148317	224451	211261	162524	156329	209061	272082	217470	249503	297976	218209	242516	242849	243950	252247	241471	365643	345079	287044	240057
O75717	52458.4	46423.1	63678.6	61655	49851.3	76895	65028.4	63937.9	74063.4	51087.9	80516	54620.4	35831.9	48294.6	40298.8	43292.1	36635	36258.6	49319.6	52203.1	51087.5	51729.3	54402.5	61374.4	35256	46303.2	54138.3	61962.4	30666.7	35739.4	40971.8	42343.8	18252.8	14212.6	28783.5	31023.2	30900.3	38489.7	68166.1	43974.5	39747.9	38731.4	54760.8	54998.7	66654.2	74509.2	94614.9	92242.5	31040.9
O75718	66363.4	55321.7	98035.3	74246.5	70279	95056.5	86525.8	87374.5	95153.4	66005.6	111205	87885.4	46254.8	78088.3	70940.5	65042.7	66154	59227.9	87568	78963.2	68154.4	73456.6	70738.2	96305.2	48055.2	65191.1	74566.6	74288.8	47262.1	46270.6	66851.4	66188.6	42029.7	33453.4	62785	53953.1	40565.9	41831.7	75982	51049.3	45970.2	50641.8	61654.4	63170.9	66737.5	114248	101300	81236.4	56971.8
O75746	107225	98578.7	168013	126551	108999	153043	147565	142875	147118	126701	198772	192523	125036	169845	167852	163473	155368	146991	204345	189841	153123	173421	171086	191364	79207.3	96843.1	124563	129184	100189	107615	141007	139690	124629	101767	161256	163386	67524.6	75188.3	108670	71375	86066.9	79521.4	87296.5	91996.2	89845.6	144829	132460	130819	91221.4
O75787	95922.8	109956	128769	106896	102912	136342	110701	122250	131628	123686	146122	NA	109453	124834	99195.6	103537	104309	96189.2	158998	150702	128478	58192.1	113729	144434	75709.4	86149.1	90419.4	100603	60235.8	NA	83862.6	95655.2	77093.3	65382.8	79315.5	114301	69610.6	74629.2	146667	93608.5	104532	110804	101984	113308	121373	196868	150117	149103	113908
O75792	197319	166995	232991	202300	190317	265159	198384	206407	250909	183968	275720	267926	167466	235579	181096	176333	201733	150579	210336	217377	209849	191702	186303	262082	138716	175694	195530	189156	147438	154814	209284	202091	144748	104098	170471	183159	159784	178805	267218	190171	171436	196331	236577	243977	231657	321857	320218	314002	170124
O75794	113208	115116	150306	114352	97188.2	164719	162063	151609	146814	130908	179944	161998	92024.9	111505	82849	87757	104488	117368	122070	116470	151645	133788	99525.6	141313	73020.3	100822	113290	101538	74493.3	102413	72699.9	89695	63878.9	64765.7	79214.6	104347	96820.8	115127	162823	124085	121087	123290	150767	141706	143504	188660	200837	187338	89980.7
O75818	51286.4	47495.3	98029.2	59334	46650.2	74032	71199.8	88729.3	70344.6	57724.7	86933.5	110734	42551.3	55674	58251.6	49811.4	51043.3	52841.4	67243.8	87086.8	54625.5	56736.7	67640	75283.7	36467.8	45938	58765	60771.6	36458.1	45116.6	52143.6	50297.2	35232	37893.4	49187.4	75630.7	38372.9	38004.1	58599.9	37317.6	36079.3	41921	45347.5	46197.1	46432.3	77735.4	73294.8	66502.4	36458.4
O75821	224474	172097	274168	257630	204801	301561	251501	251365	300501	210745	357432	247551	191452	308006	289240	249301	265118	203990	305153	250282	229795	256392	221382	325563	150385	195671	251531	257814	148598	155517	237807	221095	124352	109957	200162	173389	163359	183428	316866	219365	191828	225545	273905	249244	264340	391607	402118	340528	208704
O75822	125315	89907.5	137291	140028	110632	171318	109963	114762	176892	113596	209192	153226	94663.8	152340	140699	132311	132238	102435	157244	130694	107061	122835	107968	157861	92115.1	111502	143023	135755	88236.5	87376	137071	122389	72051.9	63394.1	110750	93227.1	96088.5	108201	159454	119536	103577	119571	138751	143809	140927	190802	196013	187064	103268
O75828	741343	522444	689496	739699	617476	867708	690754	642986	788102	606711	1.0659e+06	926817	524275	802883	723384	703619	742953	557513	828059	668061	634810	731233	624618	918998	506652	635296	689813	711798	571567	559708	711921	784701	626317	477834	713270	672215	213682	251734	340022	222891	288539	297912	262852	272374	288025	461577	385440	319695	285463
O75832	45800.2	39835.9	39158.6	44577.8	39222.8	55280.9	43637.3	36457.6	39950.6	23403.2	46032.2	25209.6	33128.6	48092.2	40068.8	38496	40289.4	29235.6	46241.2	37133	31003.1	35749.5	27946.3	36412.5	32235.5	33648.6	45228.1	40466.4	31810.1	34302.2	48200.9	44412.1	31049.5	28297.4	41923	24004.2	44425.2	38924.5	55853.5	33533.9	37688.5	47318.9	43411.3	39435.2	38471.9	64319.2	46833.1	44299	40825.7
O75843	51055.2	38937.6	62906.6	52825.8	55847.3	72429.7	57517.7	55464.6	66083.7	45370	79479.9	56005.3	47713.5	76536.5	66935.5	67852	69505.7	48053.4	88420.8	51824	59628.1	54338	61690	83498.1	36229.6	45729.5	54709	57208.5	48046.9	39403.2	64366.4	63257.7	45279.7	34430.3	69010.2	50431.8	44174.7	61170.3	86543.4	63168.9	56679.7	61249.2	66339.2	77444.8	68665.6	119444	102285	95182.5	73106.7
O75844	71293.6	83248.9	103105	80233.2	62681.8	104249	95190.7	96952.8	94179	82469.9	134445	126039	63521.9	82415.9	85134	79475.4	77749.5	73620	104930	119817	93137.9	106893	84079.4	103015	52168.8	60707.1	81530	78823.4	54813.7	74545.1	85552.8	83675.4	58051.9	68365	84894.2	101464	52517.7	52939.3	76825.7	54721.9	61392.6	64858.5	76599.2	67909.4	71749.1	117961	103212	110394	64645.4
O75865	38469.8	NA	NA	NA	50648.4	71896	NA	57513.4	65972.4	NA	128389	NA	NA	78226	59971.6	79791.2	68152.4	34471.6	91393.1	49595	29324.3	74322.1	NA	95230.5	NA	54425	40512.5	51213.7	41635.4	41883.5	67077.9	69456.2	54208.7	NA	45168.4	NA	38324.3	34891.4	82333.8	40698.6	47380.8	108902	101647	132644	114358	221907	206302	236926	114757
O75874	201510	166115	222028	211614	186166	237432	146218	165021	203152	190095	292868	232912	170515	252795	242900	205518	223342	180400	250915	145979	177924	168569	165276	258655	140785	175213	224694	224685	172826	156588	236133	215864	170259	116659	240296	182169	119069	140889	201648	135673	124916	140847	157655	145473	147859	255892	210032	175482	181679
O75879	NA	61487.2	85286.6	85179	66160.3	105853	85064	NA	100540	78921.1	129002	99307	64661.9	108388	88013.9	95376.5	89428.8	65557.2	112718	78501.1	72455.2	93413.8	72545.6	107086	56389.7	73536.6	74796.9	83582.5	66940.9	59610	92416.3	79942.6	72415.8	NA	90935.5	68423.8	56170.2	76752.4	103116	65431.7	55719.8	89319.7	85587.6	89692.6	82602.5	135967	112800	114247	65050
O75880	66533.2	80801.2	78307.2	86725.4	72117.6	112927	95289.7	68182.2	109754	87782.5	135373	115700	78727.4	110606	100859	98986.6	84493.7	89489.9	110857	79481	88429	124953	103915	121060	48576.8	58458	87459.3	82934.9	60933.9	74441.5	88815.5	89603.9	65510.3	51417	88477.6	61819.8	59238	88958.7	125300	91903.3	79978.7	85997.9	106143	110987	112494	166668	158966	151420	99584
O75882	40092.3	46022.7	77073.5	28898.1	38723.9	46851	43389.2	57889.9	38597.8	15921.7	58376.9	85158.6	39381.4	38979.6	34235.6	34893.3	38557	14386.5	42977.2	71985.8	NA	27655.5	64421.1	50441.1	22632.7	30748.9	35251.9	35307.2	24216.5	31445.6	32771.5	35098.7	38395.9	19611.2	29564.5	NA	70707.7	70393.7	113124	67821.7	79070.7	96760.4	91530.8	78265.6	92566	185175	105960	73068.6	90088.6
O75884	127066	NA	NA	76251.3	93722.4	166680	NA	NA	129642	NA	165860	NA	NA	170223	78417.6	89101.4	136869	NA	108328	NA	NA	NA	NA	109845	67772.1	102139	77035.4	89752	91533.9	NA	110877	83927.8	94676.6	NA	90374.6	NA	NA	35775.9	58038	44221.8	53091.1	36938.8	68494.1	55255.9	43269.9	88695.1	43951.4	108062	NA
O75886	135047	109797	100381	136369	119988	166026	112199	111671	146778	125719	154775	104528	123106	183595	156127	138814	160462	139344	158550	110276	110953	161876	106258	145965	90419	127487	127105	124145	96493.4	124894	131235	148465	96070.3	57644.8	116233	94373.7	79118.5	117607	150847	117983	113936	121014	133649	150480	135862	163686	168817	153366	121910
O75907	61184.4	45432.8	51811.9	63516.2	65194.2	83660.3	53629.1	48097.4	79713.9	53917.8	98681.6	51884.2	38019.6	61615.2	57254.6	53304.3	53306.8	35351.1	70784.5	54847.8	45796.2	51165.1	50665.5	77008.4	46353.7	45860.8	49127	56802.5	56343.2	41556.7	68475.6	66532.9	52924	32554.4	64022.6	46434.6	43758.7	51316.6	64104.2	42852.9	50670.4	59988.1	61810.7	57155.1	60954.4	107181	87191.2	68577	47133.9
O75909	61025.8	46825.6	70268.6	57094.1	52947.6	82382	60574.6	66147.6	73465	57755	90675.8	73569.4	51198.1	63681.8	59138.6	56417.9	57565.3	51576.3	74467.5	62429.2	61226.6	62815.5	58596.8	75914.5	38439.4	51448.7	60995.8	62270.7	42406.4	44964.8	53366.7	54265.8	33796.4	33921.2	48712.1	48630.2	45597.6	53590.4	90554.6	54053.2	55167.7	56229.1	64367.1	67293.7	68371.3	102293	98932.7	89745	56493.4
O75915	144073	94184.7	224554	184260	159514	193748	168508	83647.2	166453	120875	204445	209334	106906	266799	250137	213462	240447	126463	270222	205580	119232	137016	148397	232967	102551	135005	169616	173950	162142	113137	203405	216984	211527	123689	251097	136650	140953	141623	188786	140263	136216	152060	156127	150470	154744	292088	239070	199849	176629
O75923	95205.8	103211	114569	87107	87833.6	102409	108806	93645	99784.3	105709	131086	154027	49629.4	59896.7	195703	55108.5	55835	NA	64536.9	NA	NA	59113.7	NA	NA	76572.4	68232.9	81715.3	81747.4	70095.4	74768.4	86939.9	81071.8	67205.7	77451.3	78329.8	98591.8	NA	23360.1	41804.5	41282.9	NA	40640.1	NA	NA	45679.6	74660.7	NA	48262	NA
O75925	56072.2	52701.6	90043.7	64592.1	44775.6	85968.4	86006.7	84702.3	71034.5	65896.8	91264.6	81075.4	52463.9	82529.9	66692.6	66160.7	58201.2	71583.3	63926.6	76836.3	72240.4	94543	75974.4	85574.8	40596.5	53377.3	57885.4	69780.1	36820.3	45735.5	60835.2	58216.4	32932.4	31385.8	43514.6	46989.8	18450.2	32971.1	57606.7	36202.1	38493.5	48886.8	49514.1	52201.7	56980.3	68642.2	77722.4	69554.4	35829.2
O75934	101411	96483.5	134371	133142	102263	151187	170506	150739	137161	140063	173914	177103	91954.6	128790	119608	114900	102678	137141	136248	130281	116722	194091	146559	141389	74801.1	96864.2	124554	120922	82128.6	108460	113765	118075	77735.5	88280.8	113855	112464	80262	90331	135893	92943.6	96234.5	100092	119482	112262	110012	167288	177066	148729	90474.9
O75935	272201	207958	460246	253401	263283	308190	300544	340643	276824	255705	309793	490711	247430	340959	262341	253726	289779	250454	320152	230496	257724	291434	279678	299594	173630	183878	245701	218731	219226	208550	255036	229704	214045	170073	255315	263893	237515	276380	423806	262297	251787	323659	317562	297257	316498	512480	415328	392300	301366
O75937	84754.9	75727.5	139395	103432	80890.1	120013	120102	133592	109999	92426.7	146852	162951	77801	111070	102831	95917.2	91951.2	84939	118743	151776	93261.6	121261	106784	121787	61889.3	77151	94821.8	96225.5	66004.2	85956.8	104610	98012.7	62031.3	62184.6	91804.6	102701	66585	83745.7	126978	92195	82021.9	90319.5	107158	102016	115491	182918	162542	143216	88553.3
O75940	173392	166631	177037	220803	124744	231461	191587	225153	193665	178831	265840	216695	136859	200144	189864	210395	185385	208098	253216	287931	200006	188728	221783	251953	104047	158294	193716	213253	141994	116066	210885	213549	121873	116764	148290	241801	171869	191714	292503	204886	168140	224711	236308	228769	223163	287577	351151	294195	178826
O75943	20278.8	28850.7	NA	38754.1	52197.9	55654.8	39558.7	40599.9	61085.7	38337.3	79051.3	40882.6	44428.8	49880	40769.1	35757.6	NA	31037.8	39990.7	41399.6	31025.5	35155.6	34583.3	54110.8	25776.3	38195.7	30165.4	37593.7	38403.4	29121.3	35689.9	32341	23492.3	NA	31137.8	25289.5	22743.9	7729.11	14289.3	20569.5	28505.7	34650.3	34977.6	40557.9	37603.7	70695.3	66946.1	61494	30526.9
O75947	328798	84483.4	224859	351852	321728	420114	160039	133875	395898	121543	493771	113509	129628	442782	411902	360586	406005	89670.4	479892	123164	102920	153118	144426	455855	251745	295838	350098	337022	314842	100639	386568	386278	388727	82776.7	443738	155654	250708	291870	365504	289321	316855	285789	342170	341179	341057	539720	467900	454194	343524
O75955	113618	108834	170296	136105	128136	160887	144697	136455	137626	128530	195294	191957	99669.2	136523	128404	116678	138874	117989	141182	131919	123953	138482	112983	150620	81090.7	105978	131114	137195	108984	112223	139322	129006	148922	113580	153519	152526	35879.1	48542.5	73395.2	58378.3	49425.4	57590.5	60694.2	76434.5	47694.9	112528	91820	90707	42490.1
O75964	936859	607894	1.05245e+06	1.0936e+06	908958	1.16905e+06	965244	866385	1.11088e+06	759413	1.3462e+06	989312	647926	1.19184e+06	1.21654e+06	1061006	1.064e+06	887698	1.5202e+06	874985	819091	1.03456e+06	966191	1.25977e+06	640837	890166	1.05832e+06	989729	843723	676532	1.24292e+06	1.12909e+06	1044757	722930	1.2803e+06	1.10685e+06	899774	837371	1.08012e+06	785066	961688	841720	906955	1.04975e+06	957294	1.38879e+06	1.33743e+06	1.40867e+06	983168
O75976	86468.2	74681.7	112601	84582.7	76296.8	101680	101975	102958	89901.1	71994.8	129021	109819	64124.7	71474.5	73591.2	68817.7	88070.9	84490.5	109023	105460	84536.3	85091	107100	102397	58120.6	73873.4	87303.9	87418.9	72379.5	78668	110426	111490	76855.5	71544.2	103000	107681	37593.2	46438.7	60656.5	41441.7	48099.4	52274.4	53571.4	55815.2	55156.2	92565.7	67158.7	60644.5	41029.9
O75995	54025.2	49831.5	73253.2	55364.6	56191.1	67609.2	62518.6	51078.9	67632	55636.3	73592.6	69871.1	58985.7	88607.3	84635.6	78974.1	84271.3	75614.8	100956	74199.1	69234.7	77155.4	63843.9	88155.8	41501.4	42027.7	49409.9	52406.9	52420	47765.7	66065.4	66244.1	55102.5	50482.9	70820.3	68767.4	42626.1	63217.3	88218.8	53725	61845.2	65253.8	70993.3	74962.1	67992.7	114421	98408.4	84412.9	69059.8
O76003	182918	148356	211063	219159	159390	243296	200804	189521	254128	165175	327702	247249	121471	176319	171304	163033	150130	117351	195755	158960	143785	155722	153155	209446	128379	175965	210993	220444	127412	131004	192984	185647	102481	89163.5	149618	120446	136526	159643	237390	166836	164691	185204	204286	193122	214171	286647	285253	275448	120712
O76021	178374	141061	234705	194930	152039	229982	202477	189692	221869	172077	253759	277103	140819	200143	179390	166701	167476	159402	219130	203335	175394	184418	168513	207431	115700	154224	189524	185429	124132	131118	185174	173648	113112	104410	161698	153024	101854	107863	159768	132127	108901	114326	142919	153798	148904	195862	212357	199983	107487
O76031	108165	117331	169805	130636	101194	155339	163202	150426	156633	142689	183747	189420	109239	135889	127733	121704	118253	121393	158225	159247	138809	144409	148539	162813	78122.4	106821	131744	124550	84402.2	104135	119224	115649	76108.2	83209.6	97571	103816	75460.4	95448.2	149752	101722	103615	110410	129795	128462	131743	177686	178547	172189	103051
O76071	150379	136071	127349	131800	138144	173601	100909	167611	162041	145781	159552	210569	88562.8	150242	121477	116946	149502	116674	145971	141822	115157	73975.7	124108	128643	109243	144171	149433	131701	109288	98214.3	143393	129349	100613	84691.5	115176	133398	122161	119713	152041	122874	117066	126328	143454	133109	118822	183379	164122	155296	112209
O76075	78084.9	53688.4	122614	91052.5	68218.3	102549	112046	111106	96717.2	81294.6	130023	126632	49377.5	88305.1	95202	80480.1	73801.6	65916.9	115736	74245.1	66789.1	83704.1	NA	102543	46251.7	72306.8	101857	95455.4	61273.8	61980.6	100066	83698.5	62428	46618.8	84881	79684.3	36583	56556.3	90734.2	65014.7	63399.2	64216.5	73433.1	81396.9	63289.4	118879	104131	104466	75919.2
O76080	NA	8589.49	NA	9834.68	6231.6	15159	8420.23	NA	9284.68	6212.3	9058.11	NA	4679.13	10132.3	8656.42	4200.91	6949.47	4835.99	9243.92	NA	6611.94	4821.22	5840.05	6918.48	5883.04	8756.3	7124.24	6888.1	NA	NA	2983.62	2918.58	NA	NA	3744.59	NA	13860.5	4806.8	8387.75	4273.43	4549.36	5178.65	6702.56	5113.46	15113.7	18669	17361.5	13150.2	7794.76
O76094	107161	98310	143385	112868	99691	134495	135626	138133	127497	113089	154808	153239	97777.6	132174	123992	110865	117600	110466	137314	143945	119923	125030	120706	143455	75469.1	100906	113207	117701	85920.8	100889	118330	113513	90074.6	83810.1	111598	129483	89464.1	96015.6	130961	92982.3	89433.6	105043	107708	111027	108499	163416	144141	135484	97038.1
O76096	259264	207496	385616	288071	243111	382614	271982	501343	304979	285080	508158	465445	188027	308513	269148	266099	273202	252452	373945	467979	205519	161540	344410	475517	186418	217005	255837	248766	237072	227049	364332	341274	257271	249238	387168	346827	87924.9	74938.4	115695	50177	96444.3	141276	125010	66530.9	151159	294708	121371	57322.3	107002
O94759	2752.48	NA	NA	3263.84	3344.19	6817.15	NA	NA	6321.3	NA	14377.6	NA	NA	6359.55	5408.01	4168.21	5095.48	NA	7357.81	NA	NA	NA	NA	5879.58	NA	3855.73	NA	4140.27	NA	NA	NA	NA	1116.32	NA	NA	NA	4400.29	5207.8	3734.54	6174.55	5533.36	4322.66	7572.57	7459.15	8386.52	12021.6	15195	2619.49	4135.16
O94761	50147.2	40671.7	45501.7	73471.6	39227.6	NA	NA	56709.7	75985.4	62350.9	82115.9	105575	29364.7	69219.8	56772	51722.7	49472	NA	77671.1	NA	47840.6	61364.6	33457.5	49266.2	23708.8	44404.3	73486.1	77002.2	37987.2	97118	46559	62995.6	NA	NA	31606	NA	21901.8	74792.8	23160	13734.7	32956.3	52059.8	58267.2	67533.3	54492.3	94239.5	96686.3	101468	31901.8
O94763	48630.1	43825.2	43026.2	47831.2	52515	71248.5	50564.7	39418.3	60813.7	66728.9	83158.6	81076.4	45888.2	58784.7	40912.9	43345.5	44296.1	53707.5	54397.5	41590.7	57488.8	48756.7	36343.1	58942.4	44338.9	41258.8	37215.4	40988.3	39261.7	36807.8	42202.9	38499.6	45793.3	9917.29	37668.2	31489.1	43620.6	48968.9	75384.9	47604.8	50405.7	56298.1	56045.1	61086.6	59087.9	98925.4	88537	82439.4	64814.2
O94766	44334.1	45651.1	50782.3	49801.8	48279.4	64752.8	28744.3	65842.7	56809.7	42892.6	62823.6	NA	42985.6	56872.6	51907.3	52878.9	64220.9	53971	56065.2	70849.4	55919.2	52891.6	50862.8	60045.9	33339.7	40689.9	42678.7	41336.6	38561.3	39418.3	44298.7	41700.7	39386	37874.1	46068.8	51277.2	59650.8	51891.8	69201.1	49317	65199.8	59752.6	61788.9	66863.8	67983.8	103636	77447.1	75228	60712.8
O94768	64954.9	41739.6	72616.4	58722.8	38550.4	58047.7	58783	56187.1	53114.6	55307.4	58849.2	76242.4	NA	NA	NA	NA	NA	NA	NA	NA	NA	18604.1	NA	NA	38597.6	52949.6	54879.8	57078.2	25473.5	38277.6	45260.3	38551.5	24517.4	NA	30958.8	NA	38182	50013.9	43147	45247.9	31288.8	47020.3	33839	19615.5	41900.9	35555.7	61818.5	30028.6	NA
O94776	186681	152682	248362	200145	166851	231035	210893	219356	242702	193617	288933	318659	148006	218457	181805	180202	178657	173959	218046	235494	186427	219979	201066	244127	130365	169727	204358	193974	145034	153767	193442	188309	124633	117136	158146	179490	169792	183099	262692	180401	176188	191389	211178	204482	236647	318050	328194	302452	171186
O94804	53150.9	50397	63895.9	59869.9	44896.1	63720.6	56778.3	51368.1	65127	64208.4	92898.8	85788.4	49542.2	77982.6	71753.6	64428.3	62644	61184.6	86487.8	68040.4	51939.7	65265	63106	80948.6	37367.9	47890.7	63040.2	59740.4	39421.6	50896.4	58834.6	57315.3	37824	37774.9	52707.6	49569.7	62600.4	68732.1	89499.4	65281.6	58733.1	66338	80121.5	65869.4	73204.9	105574	104313	79348.4	55300.6
O94819	84494.5	69719.8	105058	108929	81126.7	127470	99047.3	108284	126983	100566	169726	100774	78918.4	102326	112304	102448	88825	71560.4	138446	129975	92569.2	93654.1	100203	128814	60810.5	70448.6	92367	97181.9	68584.1	67738	101301	105437	90686.2	62556.6	104720	92455.5	44901.3	70458.7	95308	71531	63663.2	68284.5	86269.4	84672	68386.8	131724	126359	120209	90608.2
O94822	56095.6	46496.5	57656.1	54281.9	45602.7	59913.3	55902.9	48601.3	67792.6	45629.6	63878.1	79665.5	41781.7	48319	43229.5	44006.2	42820.9	29115.1	53293.4	48904.4	49910.1	54102.3	43902.8	56208.2	35827.7	38842.9	48120.1	50375.6	28795.5	25092.5	41056.9	42238.7	25309.6	21702.5	31763.6	45861.7	38474.3	40738.8	55252.2	37121.2	39520	41048.2	46139.2	45108.6	46767.9	74849.2	68103.9	67116.7	31155.5
O94826	82470.3	78000.8	119842	93782.2	83422.3	115831	94974.8	107820	118928	103156	142713	177279	82231.5	109082	104523	95491.9	101832	91398.6	116809	120155	101633	108719	110851	118136	58329.1	74816.6	89555.2	93341.7	69928.9	74021.4	96459.8	93021.3	76515.7	75915.4	96053.5	107667	73410.8	79362.8	125507	83077.2	81996.2	92188.7	97671.5	100375	96414.2	164443	141216	136716	91537.7
O94829	53947.7	55726.1	NA	NA	59676.1	81983	NA	NA	84808.2	87297.1	NA	NA	73711.9	78466.4	NA	70225.4	80301	87595.2	NA	184945	98176.2	119975	115378	91431.4	32735.8	41245.4	NA	NA	37973.3	63369.2	NA	NA	39974.8	53698.1	NA	100234	49801.8	41864.9	68864.9	42375.7	81339.7	95667.8	99653.3	74683	93587	132359	129597	143510	92397.9
O94842	66428.2	59736.1	NA	85654	57858.5	92558	77052.8	75689	88609.9	84653.5	112430	107761	73855.8	104312	91504.7	88574.7	84804.2	79968.7	98545.8	65420.4	81476.1	87315	87609.8	105600	46704.6	60077.1	80021.5	85292.1	44669.3	59657.3	75750.4	71428.6	40712.4	37378.1	63123	56720.8	47713.6	54059.1	89808.4	54822.9	49236.2	65148.5	63919.5	68427.7	68537.6	106118	98652.7	92090	59089.8
O94855	178364	135936	203928	175314	160681	190923	170146	177438	171450	144898	229729	202105	105386	158528	137849	132030	144031	108039	175454	142872	124739	128292	131719	154716	135863	155911	193600	178749	142649	123864	200481	174917	119421	98511.4	168428	141441	87862.3	107008	138197	101736	94434.3	97247.4	119020	115725	104925	162079	141776	120935	106274
O94864	8871.67	9824.08	14862.3	10941.5	11499.3	20315.8	14097	10688.6	20672.3	15304	18685.5	21352	13376.1	19359.3	10477.7	11670.8	16813.6	10165.8	15143.6	18333	16315.6	18236.9	12311.3	18449.6	7441.19	9460.76	11172.3	12342.4	8312.66	11029	10226	11053.6	10395.9	6858.73	9579.42	11177.4	12425.5	13940	24047.2	10401.9	11889.4	16604.8	18069.9	15768.5	20192.6	38646.2	28539.6	22001.4	14437.3
O94868	NA	NA	NA	37440.7	24581.5	52208.7	NA	NA	40436	NA	56574.9	NA	NA	41005.5	46429.5	42892.7	33840.7	NA	49035.8	NA	NA	46465.9	NA	43607.3	NA	NA	28633.4	NA	14783.7	NA	18617.5	29761.6	NA	NA	NA	NA	45747.3	33468.6	45594.5	38328.9	31007.1	38955.6	43801.7	59658.1	60077.5	87876.3	85027.6	78564.1	45171.2
O94874	164630	145141	191795	183636	157819	216883	182041	163736	202796	176279	255137	230321	156124	229478	213232	197440	193975	186089	240215	195781	175700	207077	191251	225227	125429	154679	184357	185560	147378	154225	202918	196928	160248	140386	194856	187643	63069.7	78453.3	110502	75747.7	78826.2	82547.9	82682.4	90190.8	93952.5	131659	122059	125844	91407.7
O94880	73632.5	61423.7	97286.4	86484.5	68225	93981	72315.5	71155.9	105025	71988.4	110324	103241	43363.4	89596.1	81137.5	78107.2	79014.3	55286.7	100312	72983.3	62913.5	68673.3	62170.4	93421.9	54936	67609.2	87510.3	83145.5	57888.4	51757.4	85333.5	71084.8	49662.2	46105.8	78459	62552.4	67143.8	85397.7	128413	88575.2	91472.8	88496.9	98468.1	104766	106037	152879	147853	137330	86317.7
O94885	37816.7	38663.3	69645.5	34559.3	27195.8	47832.5	41876.8	36127.1	54179.3	35361.1	57010.5	58560.9	NA	49116.8	43269.7	33789.1	41670.5	56844.5	38622.3	45430.9	64373.2	45574.4	83279.2	56923.3	18219.2	35232.4	34087.5	39810.9	21047.6	31313.2	23354.7	29285.5	12384.5	NA	NA	NA	NA	35324.4	40783.7	19390.6	23694.5	18417.7	27436.7	27125	31629.5	34068.7	35137.3	32245.1	23990.7
O94888	68186.4	54072.6	84825.7	70694	61426.8	86375.8	71310.4	77509.2	86815	77978	106553	88080.4	59683.6	79574.2	71150.7	69321.6	67914.9	67850.4	83301.6	82427.7	65598.1	79184.7	68584	87899.2	45504.9	56447.5	71121.6	70776.3	52543.9	52600.9	70372.8	69505.8	45044.4	42134.5	58060.7	66128.4	50206.3	56982.7	90408.9	58607.8	53965.4	63046.3	68579.7	71147.5	71919.4	113386	110204	99413.9	54859.9
O94901	7316.35	11861.2	NA	7757.04	7119.27	15839.9	29310.9	NA	NA	53371.7	20098	29102.5	13306.5	14550.2	7409.11	6836.51	10222.7	13675.9	10690.9	NA	23492	NA	15294.8	7977.23	6658.01	7550.74	10796.8	5916.38	3553.79	13292.6	3644.71	7117.6	4942.82	NA	NA	10526.4	10363.8	13329.8	28670	14946.4	12432.5	13148.9	10650.8	11422.6	NA	21168.4	29155.3	14742.3	12156.8
O94903	193852	159855	233739	199556	187984	244630	183943	202169	216077	194936	289156	287756	193401	268882	234280	219710	243188	205235	265367	241014	232930	223581	187185	255069	134631	168483	201551	197524	169043	155585	207553	206188	192151	137972	228161	210104	102462	114909	162644	114712	110822	121364	133857	142270	125935	200585	189936	168993	138206
O94905	194875	167621	272950	211269	189793	265272	223619	247405	241971	215287	304041	301073	184020	238282	231008	215893	222119	203257	278873	264595	225065	254949	227520	268945	145064	162981	210828	207714	158787	172839	237256	216283	192307	177866	246380	232169	154207	155485	214091	149722	144864	166457	179022	166980	165513	283356	242217	207817	189946
O94906	93207.6	76593.3	124526	106027	87104.4	128222	103164	103106	127246	95754.1	158240	120926	75489.2	102479	97061.2	88870.8	93408.2	78069.6	109801	105080	82394.5	97066.5	93533.4	119101	67167.2	81973.6	105089	103662	75348.6	82683.7	100190	95500	74607.1	61945.3	88434.5	87669	75432.5	82882.2	126490	89662.8	83323.2	87671.9	101492	102313	102789	152848	151376	145420	79847.9
O94913	46673.4	45715.7	NA	61265.6	47166.2	86273.1	48304.1	142750	59742.6	54055.3	94553.9	NA	37215.4	66719.2	53093.1	53314.4	49960.9	35687	74650.7	NA	50425.6	62298.5	49253.6	67956.4	33678.6	48619.3	54950.6	59949.9	36947	40070	59533.2	55085.4	33228.1	NA	46166.3	NA	39000.8	50069.3	74951	50410.7	48007.4	58589.3	58632.4	60038.9	61511.2	102655	88818.7	86414.4	49165.4
O94915	49913.3	41322.1	60147.5	57533.2	44910.7	71411.4	54376.8	49431.3	64562.8	53627.4	85400.3	65046.3	47213.2	71462.7	61374.2	64495.9	60953.6	49804.8	79312.7	64214.2	58709.6	54138.2	59592.6	77480.9	34520.8	42448	49628.2	58305.1	41336.8	40892.2	57092.4	54267.2	39776	28249.2	49484.9	51741.8	29234	38182.8	57429.4	36771.7	39968.1	39845.7	38585	45430.7	40718.3	75091.6	69346.5	63254.9	38837
O94919	NA	NA	NA	44534.1	NA	58884.6	NA	NA	52844.8	NA	48048.7	NA	NA	85609.6	75686.3	84580.5	60977.6	212707	89301.6	484762	262680	224744	NA	102270	NA	NA	NA	75221.2	NA	NA	NA	45737.7	NA	NA	NA	NA	NA	32347.8	NA	59109.9	NA	78458.4	48887.9	21566.4	56955.9	NA	49494.9	26151.8	19430.4
O94925	117891	87396.9	134848	120776	117208	191229	138073	125220	196405	121196	213619	152982	79877	144652	126985	114186	118850	96572.8	175002	141770	130156	148818	127814	190819	79759.8	113714	118757	127746	71029.6	81207.1	109555	106068	63381.1	52929	89175	82535.5	55842	61081.9	91347.2	53648.1	71341.3	74885.8	80168.7	81296.3	91584.6	143520	126466	128672	61430.9
O94927	50701.4	28687.5	51242.2	37323	41026.9	59366.4	46720.1	37062.8	66978.6	38461	65268.8	50415.3	28867.1	43047.5	31428.4	36712	34857	27794.1	35541.6	45455.1	34672.3	37599.7	26690.4	45886	29381.4	29191.2	29772.7	36877	26684.8	23587.3	28650.9	25599.4	21763.2	26587.9	20381.9	NA	35713.7	38230.8	58018.8	36404.6	37011.2	37214.4	43591	37132.3	51528.4	83520	68691	55719.5	33142
O94953	60005.4	49599.7	65661.6	66909.5	50374.2	75074.5	63193.2	44553.4	74211.3	76337.9	85466	80362.1	49275.7	80229.9	70292.8	59208.5	58783.7	50813.4	66240	54912	52013.1	66504.1	45396	89682.1	40458.8	46726.4	61155.3	64870	43820	38867.5	56763.7	61800.7	41952.1	29467.7	50789.2	30547	60621.3	69098.7	97136.5	62392.3	62181.3	64939.8	63747.5	65398.7	70686.3	105922	104799	94968.1	60631.6
O94966	80323	67102.6	109759	80626.4	67554.5	99311.1	97048.7	99371.3	86059.9	77492.8	102887	101676	74823.3	87276.3	79094.8	75434.8	77311.7	78060.4	94466.4	90626.6	82508.3	93614.2	79292.2	104078	49569.8	67021	81411.6	86855.9	50559.9	65676.1	74032	72634.2	49196.4	45702.7	61357.5	76647.5	50674.7	65468.6	102255	66805.4	71151.6	81273.5	86031.5	88462.2	85494.5	134043	124267	118593	66677.4
O94967	NA	11665.8	13737.6	16380.5	NA	28595.7	NA	17060.1	20529.5	NA	23653.8	NA	22617.4	35612.3	22179.6	22717.4	27559.6	19125.1	27728.3	21482.1	21807.1	19177.8	19090.7	28849.8	13852.9	14264	20528.6	17884.9	NA	11335.3	19056.2	13756.3	NA	4564.94	NA	10432.1	11486.6	23537	4787.17	4539.66	15816.9	19708	23107	20049	26056.4	37766.9	35677.2	26559.3	23243
O94973	88201.3	72830.4	100721	100342	85375.9	117863	92703.1	82659.3	115283	91805.7	143043	114150	78036.9	108571	105578	100827	105020	84842.4	112863	97654.8	91112.5	94945.6	88314.1	126859	63974.1	82487.1	98386	101497	74680.4	81702	102297	100855	78022.1	61201	100181	97243.7	72275.8	85883.4	123770	87155.7	92211.6	99898.7	101292	102960	105164	164745	141487	127067	95377.9
O94979	101794	79987.5	125823	103786	91668.1	120647	100639	93596	109070	90376.7	132537	119636	93919.9	138342	122709	112482	122290	98236.3	140381	121393	109840	112956	106389	134169	68231	88267.5	101637	101160	84277.3	78157.5	113756	112141	86836.2	71809.2	111509	117346	72528.2	88680.5	123729	85891.4	84616.7	92040.9	100654	103447	105200	161104	141611	128959	103698
O94992	43810.3	43319.8	84473	34034	31357.8	45194.6	49808.9	73630.3	48934.4	50461.3	52764.7	158831	41414.2	44943.6	35634.5	38558.2	37658	62955.3	43822	67663.5	35299.7	52199	43072.7	52688.2	24854.9	28436.4	32046.3	36129.6	27068.1	36597.8	30839.4	38018.1	21502.4	27177.8	26256.1	8627.84	20309.4	34793.6	49129.9	33280.2	34999.3	36212.6	35841	41187.9	45624.8	61402	62919.7	55113.9	34220.4
O95067	22287.1	28562	41354.1	29235.7	27077.7	52876.7	54242	50297.5	44802.9	34985.8	56766.5	NA	NA	23695.8	29844.7	22201.7	NA	NA	36431.8	NA	33419.1	43220.2	34730.5	46531.3	16024.6	27310.9	33892.5	34942.3	9914.8	NA	22427.3	12960.5	5360.32	NA	NA	NA	NA	7616.94	25796.1	19837.5	13264.3	17986.9	18744.9	32328.7	48543.6	80958.8	62740.4	62700.9	14970.5
O95070	23834.3	28679.9	112643	22429.9	22563.4	39761.5	43585.3	81388.4	36738.5	37139.4	62023.3	NA	29317.1	39512.5	44549.9	37021.1	36263.8	34919.8	40052.6	51958.8	67362.8	73482	82693.2	46349	18979.3	25232.3	34649.9	28500.1	19854.4	35140.8	30959.8	NA	23942.6	38064.9	NA	118887	26195.9	32501.8	48101.3	37032.9	33379.3	29335.2	42145.4	37565.4	39909.7	61971.1	42984.2	51196.4	36324.1
O95071	81304.6	65816	94969.1	87044.9	67841.6	104595	100540	95088.2	100188	85351.3	117792	85710.8	64066.9	88934.6	77560	73958	69458	64640.2	91453.9	91051.3	82612.7	84192.2	75966.8	104111	53829.3	71890.4	86761	85035.5	50568.4	60658.1	69337.4	67474.7	43626.7	37151.7	61595.4	63039.3	45634.6	54012.3	75878.8	54064.8	55337	55647.9	60962.6	63688.4	71852.8	99779.8	98718.3	90965.1	52479.7
O95081	39428.6	NA	NA	63690.9	50486.9	88745.9	30455	NA	72776.3	NA	NA	NA	NA	99669.7	90660.4	71181.6	65873.2	27368.5	108618	NA	NA	NA	NA	101457	32390.2	NA	85944.2	50192.7	42204.4	NA	84008.5	58618.5	44994	NA	NA	NA	9137.89	17898.2	52966.1	24144.6	33611	26655.5	45151.1	41501.8	45095.9	94773.8	89442.1	90107.2	41528.2
O95104	102517	80979.2	97025	96361.1	82609.2	125063	96676.2	85424.9	121855	104346	124214	113987	91144.7	112816	85755.8	90546.1	91663.6	77176.2	109481	88984	95384.8	94700.3	92028.1	113501	69520.3	80687.3	88088.8	97694.1	74093.9	78181.5	89905.5	101818	57660.6	48773.6	73849.1	69016.1	67233.8	92406.1	122865	87370.4	89553.9	94897	101412	110022	110467	142495	131456	140152	81878.6
O95139	195037	187885	146889	228987	292736	337657	205238	543828	393759	257351	334575	582267	198236	311062	271173	233582	276020	267396	320631	339198	201488	235871	306768	302944	169035	184042	219026	213128	212772	164418	225571	231408	262176	205394	244703	176152	194640	203634	232256	163443	247282	191726	191942	254774	272912	482783	336017	294226	239311
O95140	61084.2	54682.3	89649.9	69450	68240	97691.7	89349.8	115201	84159.1	64602.1	99612	88476.8	59585.5	79678.2	77695.2	71271.8	82022.6	85919.9	96886.5	102035	77363.2	79434.9	90620.7	93132.3	43393.4	53839.6	70668.7	67677.4	47279.4	58805.7	73847	70762.2	54871.7	50563.6	70688.4	95012.3	50104.9	48853.5	81627.3	49726.2	65593.6	63837.7	75229.5	77926.2	71688.1	116521	98126.7	89253.9	63560.6
O95149	27723.3	38049.5	NA	39030.6	37859.3	44050.2	44245.9	51885.9	39024.1	38550.9	49095	NA	38893.8	36041.2	28228.2	33017.6	32213	44958.9	34859.6	NA	27767	31111.7	32069	36666.3	23520.1	30005.2	34245.4	28764.7	24615	28372.7	30231.9	30790.9	13737.6	NA	27468.2	45187.9	27373.5	31397.3	46077.8	36513.5	29518.2	29495.3	40539.2	37402.3	39458.7	57642.1	58650.8	45735.6	30333.8
O95154	108753	95681.3	141438	122330	101234	149898	138292	133138	150915	129092	184063	164513	147350	191274	211163	205955	181312	155570	207829	176882	175613	193054	164847	213672	74287.8	104755	168425	135145	79156.9	115322	176401	158587	94344.4	84678	131826	121817	93102.7	49802.9	99028.6	64255.7	38188.9	80439.2	77114.4	43426.8	42568.1	66638.8	90596.1	78647.7	37875.5
O95155	56249.4	51043.8	70495.4	60017.9	54613.4	81868	73598	57421.8	78614.6	71246.8	93057.9	76015.3	49928.8	69938.9	60955.3	56728.9	65386.8	57101.3	70347.6	60264.6	68287.4	65656.6	58584.2	84347.8	39895.3	51044.3	55316.8	59144.4	48444.9	54035.8	58990.4	63995.1	39475.5	39602.5	50993.6	50419.9	33285.6	40601.3	64132.9	40934.3	38126.6	44495.5	47890	50227.5	50340.7	82520.3	73978.3	67259.3	41488.1
O95159	52337.7	40402.1	NA	41272.4	50152.2	54498.6	NA	NA	58582.1	NA	58358.8	NA	33610.9	59360.7	43103.8	40106.5	61918.3	NA	63126.2	NA	26894.4	49577.5	29271.6	45540.5	33671.6	48274.8	43364.4	43784.4	49009.4	17495.1	47905.7	52526	41047.6	NA	46911.1	NA	34061.5	89379	93294.1	72322.3	85122.4	55036.2	59881.8	61388	61761.5	92036.1	66901.7	61312.9	52099.8
O95163	97817.7	81989.7	126923	104361	88428.1	129519	126309	117944	125539	101324	144670	142024	93817.4	123890	109606	101526	107758	91102.2	119742	124255	110610	113565	113832	141267	66675	84610.4	101648	103670	70146.6	83075.3	103003	94788.3	67177.5	61552.1	92960.3	103939	67170.2	79773.6	112905	80589.7	79107.8	89151.3	86288.2	95666	94278.4	148860	134806	132674	67843.6
O95167	66606.4	97123.8	93358	87783	92222.4	104004	43394.3	NA	92440.7	113597	89173.9	NA	53579.1	87770.1	100248	101198	78624.1	271126	121630	132372	22782.8	25609.7	112245	83947.5	57406.6	47164.7	52909.9	83388.9	71212.4	25104.6	101197	88191.6	75487.8	NA	83323.2	140527	102758	76257.9	87884	63161	74062.9	99320.6	92242.7	87725.9	84246.2	125409	112553	100032	97325.7
O95168	261460	218121	281691	277793	268112	331704	279798	266755	346419	254551	344043	305337	287371	399186	344407	316131	379095	322268	385762	342798	330828	362353	334407	427299	192551	230619	283138	257220	252338	269308	323962	331998	332774	257269	380657	338818	199787	185069	231829	169978	205282	187533	190741	204540	211766	332780	300815	259234	268316
O95169	210695	124747	209545	254130	234039	293936	111799	193742	297722	128132	315284	266397	102487	326481	256816	224247	301361	130953	301115	264256	114405	111215	200962	276177	121736	166527	226025	197088	171573	73744.2	216049	229082	202990	193212	244344	211986	137186	137647	208521	144106	180924	147509	181225	178327	181245	290331	304498	279557	195391
O95182	49757.3	52248.3	76988.4	61756.5	61540.8	97091	66345.7	62718.1	85848.1	72557.2	64335.4	126361	60614.7	103566	83057.3	77847.6	93509.2	85239.9	89651.1	90118	81594	99353	60170.1	99966.5	40785.6	55426.6	61238.5	64823.4	54014.7	60773	69013.9	72590.2	57675.7	47249	75792.2	59748.9	47467.6	46838.3	54690.4	35225.8	45710.1	43591.4	41977.3	47690.1	60397.3	84939.5	76184.8	85953.5	63148.4
O95197	372128	265543	360011	418417	380892	467364	396294	331624	417793	340890	658568	345114	310162	363777	406201	365988	380923	299292	502114	358122	304380	373353	327724	488167	265583	311034	382158	413547	312514	330545	449493	440407	348535	268633	474636	348069	226613	255181	327970	259985	220995	275279	322115	309517	275231	479702	476082	422266	200492
O95202	94704.3	85170.4	135283	114014	94555.1	133419	124296	119979	125519	109333	170053	163568	97673.8	142008	130970	126360	123944	122506	157764	148557	124462	137219	135883	150824	69310.6	90904.5	109998	113590	88607.4	93915.3	118749	115571	99822.8	84106.8	124390	134477	92905.2	101244	148031	99174.5	113318	112229	122351	128445	118052	206717	181981	166070	138634
O95218	58272.7	48230.3	74473	58002.4	50892	71010.3	63314.3	57511.2	74445.1	62649.7	78697	83332.4	52328.6	67727.9	61215.9	55489.6	59514.6	56842.3	69510.3	66731.9	60127.1	70597.4	61685.6	72303.5	40484.9	41010.8	52591.5	60797.7	41078.7	53220.7	50567.6	50134.4	28009.2	24760.6	41227.6	43625.7	38218.8	40043.3	68621.8	46592.2	33861.7	43922.4	54965.2	50774.3	51311.7	78704.5	79553.1	73483.1	36734.4
O95219	52310.1	42884.4	46911.8	65469.8	57834.6	91456	51858	48784.9	75619.8	50778.2	106353	54963.7	47259.4	71537.2	67580.8	75144.7	73916.4	55084.6	80744.6	43121.8	57973.9	73533.5	54509.3	86309.9	33018	43107.4	60872.2	65299.2	44898.8	56182.4	49973.2	58689.6	46356.8	12762.8	52875.4	57003.5	44499.1	48131.2	98748.7	56395.4	56032.2	71819.7	68888.7	75159.7	69262.4	158550	140048	92890.1	69107
O95229	98147.7	NA	NA	50059.2	87677	172012	67634.5	NA	144897	33884.4	126224	NA	NA	NA	58112.6	41638.9	NA	NA	66138	NA	NA	45129.7	46578.2	77756.6	NA	NA	NA	54082	NA	NA	51612.7	59181.9	NA	NA	NA	NA	NA	51576.4	49468.5	NA	20258.2	20509.9	17168.5	31880	48676.3	49840.4	31743.9	56280.5	NA
O95232	106904	86455.6	105343	112546	115051	156949	102201	107833	149092	101943	170073	121171	100302	147997	108916	110955	143194	91662.4	128689	102362	109829	105734	104391	132344	77703.6	101504	105833	114983	95369	78448.4	107728	109137	84305.1	61924.3	95044.7	89100.7	71280.7	85093.6	142608	96410.9	96067.6	109310	114320	130799	130477	198761	170763	166292	96334.9
O95239	63575.3	44267.3	109991	60523.2	56511.6	91508.8	93818.2	NA	95532.6	60953.2	91480.9	146504	55365.2	50479.1	46164.6	45882.1	43860.1	36012.9	52897.3	53939.2	41983	64502.5	38434.8	72458.9	32735.9	44149.4	56705.6	57815.6	36806.3	44516.5	50106	46276.1	24588.6	NA	33086.9	NA	50461.1	37291.7	70720.9	49967.6	42881	46229.6	61922.6	52821.2	70065.1	84408.9	98318.8	82544.4	40007.1
O95243	79931.7	NA	134352	81918.9	75683.4	120645	159508	167561	110129	NA	126516	NA	NA	85852.4	62919.6	62907.9	59372.6	NA	73264	192600	73143.8	NA	NA	89232	50425.5	93074.3	84143.9	87606.2	55521.6	84596	88055.3	79227.1	56315	61673.9	70510.6	NA	59048.2	68137.4	88007.5	69741.3	81079.6	71999.4	86231.5	85639.1	87117.9	115260	125716	117227	57096.5
O95248	13359.8	14533.6	14072.5	16951.1	18950.2	31804.2	21217.9	18041.1	26791.8	32049.1	26918.2	24754.3	12040.3	26922.1	20010.7	19859.8	18125	26899.5	21621.6	NA	24391	28137.7	NA	20181.2	11775.5	14218.3	18979.3	19818.4	13018	20393.5	25041.3	NA	11656.7	NA	17375.9	NA	11018	18856.1	39842.4	4279.56	14194.1	18193.4	17207.2	16489	21274.1	36891.8	34145	31260.5	12854.6
O95249	147559	74780.2	NA	137162	123001	185597	134225	90647.4	164595	63822.7	201801	38675.4	75034.8	163732	153888	147734	132552	58656.9	192549	86954.5	116686	111054	68347	156762	77130.3	102792	117984	127082	54872	44936.5	117055	118599	81476.2	63423.8	98161.5	60426	69862.8	70958.1	114943	81209.1	78348.3	79154.5	92084.2	98737.4	89168	143651	134094	119064	79598.4
O95251	62934.1	59883.8	88681.9	67868.7	59506	84972.5	87210.4	94024.6	92035.9	83616.1	103133	104040	58132.1	67658.9	58557.4	54901.2	61585.3	59487.1	71916.7	88151.1	64423.4	77658.4	83108	85465.1	39985.3	52307.8	55562.8	65927.1	47514.5	55544.6	60276.8	57042.3	37081.5	43108.2	45165.9	84665	42984.2	54846.2	84375.1	56084.2	58822.6	57916.9	64360.2	74266	75698.3	96222	111922	103657	54611
O95260	56366.4	64091.1	78582.2	88063.6	53592.8	95394.8	99728.2	93939.9	86719.1	92548.8	125964	115906	65354.1	102642	75582.8	79144.8	77325.9	92331	106660	83535.1	83919.8	102466	88721.8	98155.9	47588.4	56956.6	66189.2	76291.2	50207.3	60176	69340.3	72625.7	52799.7	42990.7	67898.8	86770.4	24768.2	34023.6	64679.2	34223.3	38931.8	46458.3	45551.5	46333.6	53741.8	109331	71781.2	81591.1	44768.4
O95292	108271	89975.7	142166	113146	87645	131538	122107	137889	126648	105480	153903	146993	100908	147228	136670	130172	124630	128433	160680	170460	129053	140942	121153	152043	79698.8	77463.9	105321	112352	71173.3	87451.3	107674	119266	86328.2	63978.6	109979	119573	71033.9	103269	134269	93688.4	79447.7	100475	110239	109561	100622	160636	151728	134313	95395.2
O95295	135210	116745	160621	147523	128864	170561	150748	137995	155707	129219	163791	200142	144004	209516	168409	169842	168381	159173	215175	181295	164982	158254	153103	225425	98474.8	120213	137927	153606	118688	136938	163187	150674	126261	113706	147540	168157	104675	121357	166028	119234	116244	133144	126595	147898	131086	184494	185694	165215	137607
O95297	18167.9	NA	77080.3	40727	NA	53867	74604.4	NA	NA	NA	55303.4	NA	NA	77659.9	81302	65601.6	67369.2	NA	89959.4	102981	76151.6	91792.8	105424	72321.3	NA	27142.4	35928.9	43473.2	16611	31692.5	46105.6	74285.4	17785.2	39444.2	44985.5	NA	51000.9	39507.8	61542.9	31770.5	72210.6	69577.8	86024	76396.4	87925.6	138959	126996	101118	98480.8
O95298	68794.9	77604.1	167528	93946.8	81137.6	121379	110423	114064	121862	103862	146028	215251	93781.7	128106	125715	112182	113556	125592	145015	149876	119865	129378	121497	145338	54672.5	69586.9	89418.7	92249.4	77814.4	81793.1	111020	103525	99006.7	83268	119855	141519	73303.6	72299.6	96381.7	58787.8	81811.2	79672.9	75445.4	79684.3	88006.6	146937	130371	124629	98708.9
O95299	79084.6	69597.2	92612.2	88863.3	78363.7	108122	80000.4	87934.3	103057	77082.4	120084	106674	84735.6	124284	102740	109250	116207	100929	126235	107697	93343.2	108455	99475.2	130635	57128.6	73467.2	91645.8	87179.3	76153.7	82177.1	94687.2	101608	82123.2	77798.3	99532.6	105279	64449.8	59787.8	81435.8	60714.3	64024.7	60536.1	69814.9	67011.2	72395.1	108588	99795.9	97582.2	78035.6
O95319	124037	116013	138667	120181	121962	161806	105852	103417	142643	122877	183957	148303	128109	162496	121066	115761	134377	115942	130977	111364	118468	114979	95477.9	125766	97574.5	114091	118626	115648	104487	98336.1	122177	125124	106846	77423.5	109625	87423	109420	126274	175730	115306	107775	132516	129792	132541	126109	193715	183820	170360	110666
O95336	345784	270676	398918	342563	304139	412548	362772	361840	377058	326931	505598	461047	321903	499805	428483	401022	430918	379059	533023	428887	387913	431614	395822	516786	220827	293003	351448	352873	250641	262116	371244	352015	248388	219079	358419	349155	321002	416221	564851	408195	417941	407408	475799	530567	447030	703834	662777	602242	499942
O95347	130499	114804	176396	155212	112957	179453	159585	163696	192905	153397	220680	208029	104349	131273	115117	121983	109556	98666.8	133803	149833	132204	145375	141021	176274	91778.1	117956	136274	149275	91268.6	108981	129185	129183	64319.4	65706.4	88500.4	91276.5	76525.8	90312.7	127390	94271.3	82197	86245.2	106117	101299	125203	149013	171434	163600	57575
O95352	100593	83430.3	142517	115250	100342	137357	105833	103271	122558	87621	160767	132186	65383.3	101263	99117.5	92654.7	101968	86578.7	114440	107659	83651.3	108863	97831.1	116955	77907.7	91342.3	111925	111802	84757.4	81383.6	120539	110936	91107.8	70877	109011	101339	59624.9	77181.2	112604	73848.7	74321.3	81738.5	90272	91578.8	89745	152456	133732	123165	77146.3
O95361	127307	95614.7	154845	131423	97035.4	156323	124590	103481	94069.4	90273.8	177409	144913	111881	194625	190876	174811	167026	121678	206819	153871	129676	135662	135236	179210	88281.9	113424	144169	136058	101810	102756	155965	141592	131689	100212	189685	157698	51176.3	57324.3	86363.9	49317.9	67029.5	73023.3	64462.8	53136	55546.3	143403	62394.7	46050.2	77635.3
O95363	50679	42324.6	70708	67716.7	41644.9	92842.3	66962.2	59519.1	89969.5	61082.6	114414	91945.6	63124.1	90201.3	75850.6	76235.8	75308.9	60881.9	98799.1	95463.6	67078.6	87583.5	68191.9	95863.2	39187.4	49032	57268.9	64581.7	44532.1	53641.3	63824.8	77830.8	54387.8	43511.6	61262.1	73867.4	43442.5	45593.1	84876.3	50338.4	59156.6	56661.4	67044.8	70254.6	72989.1	110694	109508	105930	62296.5
O95365	33636.6	37010.3	149815	37521.6	31792.9	50881.5	57956.5	NA	55414.1	54007.2	60810	NA	32458.7	40862.6	38217.8	32784	35986.3	32658.1	38694.6	NA	59032.9	59841.1	52813.2	51466.2	22027.2	24376	43682.6	39796.9	18134.9	43156.6	30288.9	29488	18833.3	NA	29065.6	NA	12797	24206.3	57105.5	29364.2	21310.4	33366.8	42333.3	30715.6	33608.2	68377.8	63772.9	60451.9	25953.4
O95372	75921.1	81722.5	213426	94397.5	73667.6	124727	99472.2	40869.2	84513	105167	143294	141365	59738.6	97948.4	96477.7	89892.8	93428.3	41223.2	103116	142474	67254.3	63377.5	97826.2	108330	52728.7	66568.2	93045.7	111289	64298.1	67087.4	106881	86879.1	67416.6	126801	83955.7	70186.4	67756.7	73139.3	122942	78629.8	76898.1	91673.6	92875.7	99216.8	85517.6	159204	158899	143187	84057.8
O95373	125301	108432	150966	134983	115829	164683	138576	141304	163775	128204	179400	148650	107642	136034	139529	137507	117509	91448.9	160596	142365	124166	130130	133718	169748	88703.7	102640	114892	139462	93055.1	77807.2	126038	123713	78749.9	63601.4	103512	113840	64441	85097.7	133244	92643.8	87887.7	99263.5	108913	118740	109095	177729	163456	158673	85248.3
O95376	38747.2	37085.5	40388.4	42623.9	41581.7	63792.2	61333.4	26636.8	68108.8	53729.4	82425.3	91268.4	40733.6	62474.3	44473	42525.1	55005.2	44676.3	53384.2	43946.2	52550.8	59028.5	56493	57561.1	28341.9	36072.7	41676.6	43034	34317.7	36847.5	44773.8	40473.2	35069.2	30564	46058.2	38341.6	42152.6	38439	64666.8	36281.2	42366.6	42579.9	45025.1	44252	51824.7	82709.1	76400.3	75270.9	38505.7
O95379	86675.2	53234.4	294983	71077.9	74759.1	98059.9	86446.6	204333	84200.8	184235	94548.7	280949	63900.1	98855.6	79502.6	69296.6	74909.9	197528	91247.1	285346	199134	185798	96140.4	78854.7	57996	62397.3	64464.1	62128.4	66902.1	35994.1	68740.5	61808.9	55822.9	86851	61097.6	130890	82414.2	82972.6	44012.6	69559.5	77937.1	46767.8	75518.4	42769.9	55918	83024.5	100937	60716.3	68562.9
O95391	38419.3	42144.8	88388.3	45207.9	42062.5	62126.6	50536.5	74214.1	68313.6	53207.9	69605.5	67753.9	34200.4	52141.9	44363.7	44226.2	37075.2	35005.5	48575.8	43822.6	58423.8	43119.1	46767	54062.1	29756.3	41607.9	47404	49673.5	32467.8	39526.6	41792.8	38082.6	25706.3	31875.6	31333.5	48056.8	28690.5	37409.7	54708.6	35097	32884.2	42226.7	43656	43101	43867.1	69772.6	68853.9	58535.7	31465.6
O95394	132292	109517	158072	146651	121771	179509	143826	141250	157592	122960	207041	199882	115502	161443	141940	129520	138473	120584	149823	148911	123533	139445	127627	159258	92689.7	114296	137595	139822	100713	102454	146902	135518	108561	77925.8	137650	130216	49816.9	67561.3	99975.9	67770.9	67567.7	65004.3	75014.9	81175	80953.6	142593	112157	111738	72504.7
O95396	84320.2	68076.2	NA	81419.8	62356.2	119013	97339.4	NA	81140.2	83554.8	130136	90536.7	56889.8	97579.1	66579.1	85192.5	77212.9	59126.3	100152	NA	99482	90746.4	NA	111036	57190	71421	68607.9	80199.7	56555.8	73585.2	75007.6	76582.9	51205.2	NA	54028.6	92315.2	36981.5	64005.4	102348	61730.5	71060.6	77136.5	68298.5	82603.2	90938.8	125177	119250	123853	70732.9
O95400	96331.3	86708.9	280584	123828	88488.5	157929	89775.3	186367	140965	100558	191740	337942	97211.4	112391	113464	114271	104094	107199	118166	251817	104201	181084	131861	136017	68893.1	86848	115282	124234	75690.1	32598.9	109883	106210	54126.2	NA	86806.6	134233	75755.1	96196.6	173344	104761	88214.9	106743	121038	124224	132279	194621	203117	213182	88795.5
O95425	21149.5	23405.5	NA	24245.8	19106.6	46927.8	NA	26626.5	29567.9	28270.2	35864.5	43912	31729.1	46422.8	37662	31486.2	32940.5	32320.6	41177.4	31346.9	35926.4	36481.1	32632.8	40220.3	12675.2	17929.3	25073.9	22446.5	15979.3	NA	26454.4	19443.8	18583	15731.4	23618.4	15633.6	9634.09	16579.3	29555.4	10586.3	18542.4	16689.3	16689	20143.9	34113.9	39992.1	26329.5	30880.1	17529.7
O95429	52249.8	56566.4	79109.2	60516.8	52260.8	79384.5	66484.9	65936.7	71158.1	65546.4	82162	84275.7	59270.2	79077.4	63132.6	62268.9	68997.2	64194.6	72818.3	69675.6	61304.8	66513.7	71670.8	75727.9	36773.5	47768.2	59687.1	61921.9	36073.3	49865.4	59437.4	55934.5	32287.6	43629.9	47709.5	52928.6	25203.6	32392.4	54812.5	37122.9	30834.1	39923.2	45837.4	44955.4	47217.4	70601.6	69416.3	63603.5	30794.4
O95433	180775	134438	212049	189993	161136	242819	209547	211583	239118	164671	283811	237479	117994	197890	163426	168725	168287	138433	202700	190905	146339	176552	159285	235141	121425	164515	191867	193101	119649	119245	166571	162672	101554	93357.7	129232	124423	114787	136109	225473	159361	148137	167568	193881	188366	204514	285149	300971	289681	133492
O95453	106718	113018	150700	110120	109754	131599	141267	126559	147289	126488	163592	178333	110929	147828	112247	125526	139002	119234	142157	136208	143035	131399	129988	147429	84765.2	100686	111357	111354	96875.9	107216	112275	110800	101216	93524.4	100283	154898	89651.2	97918.6	140256	97524	96081.7	99751.1	113864	122148	110664	164855	153895	153362	104822
O95456	67099.8	56634.9	65822.1	72388.8	64304	105013	75852.3	71749.9	99153	69076.5	105892	71709.4	47772.4	70516.9	60209.7	57222.2	55377.7	45922.2	71207.1	56890.2	67953.6	67810.5	57781.9	76998.6	45975.4	55205.5	60351.5	69466.7	40486.8	37139	58641	54551.4	34406.8	22609.6	41075	38437.5	34935	44766.6	73301.4	43542.8	53308.7	49213	52019.2	63368.8	64364.9	96642.1	89899.6	97784	47566.8
O95466	122745	94167.2	147555	129682	116689	149585	130458	125536	151660	117230	185847	169835	99002.5	157077	143721	133164	141060	122941	170686	148577	117306	136764	133350	162178	87025.8	108321	133721	133696	112372	111228	147624	142192	116093	99981.7	147499	133673	85069.3	102992	140859	100413	97214.1	109616	123586	123266	104346	168269	161941	137921	97256
O95470	41413.5	211584	NA	53779.6	44475.8	62166.5	74744.7	66150.7	62690.6	49147.8	82225.2	76028.1	38314	66950.6	67170.9	60274.8	62957.5	59106.4	68261.8	78006.2	86423.6	67382.8	43571.4	80645.9	33869.3	36276.8	48858.7	49521.1	36196	42136	50117.1	49782.1	39808	45555.2	60459.4	NA	30880.5	40698.2	53370.4	38788.6	37513.7	47649.2	43835.9	48478.4	52517.6	62266.6	67126.4	60123.3	40629.2
O95478	103328	90817.7	91509.5	120998	101823	148490	125979	122261	146659	81674.1	151006	110057	59428.5	99242.4	110689	104641	84177.4	49266.1	130764	81977.7	86045.9	96925.2	87026.7	96257	79101.6	95310.5	116305	119480	67725.6	47714.8	100148	89450	61420	35736.2	67865.4	20016.8	89005.7	94546	137016	93754.7	104891	107421	124048	137488	104060	165794	160781	139932	91248
O95479	118132	98248.3	125620	133231	130229	171069	135008	133301	151943	105302	223991	183928	69662.3	117316	111358	108623	127888	118432	137339	111143	95780.7	115697	93110.8	135203	83074.2	110264	130456	132677	108942	102857	138178	133413	134752	73623.9	150683	126784	64484.9	46476.5	81141.4	54939.1	61042.3	64545.2	58247	68546.6	46188.2	103737	84339.3	90919.6	65821.7
O95486	66263.2	55926.9	83990.9	83356.4	65382.5	86974.4	73887.7	72460.7	88155.8	67963.6	107028	81304.8	59045.1	92891.6	78038.4	76272.4	77881.9	63508.8	94912.4	88849.4	78164	84004.5	77481.8	105920	45564.3	64369.7	75227.1	78822.9	47892.7	56340.2	78571.6	72363.4	48077.4	46283.2	67180.4	66197.8	33931.6	51867.3	79683.5	50281.6	51440.9	61397.3	64530	63255.1	66291.8	112200	105544	95682.7	55655.2
O95487	47216.2	45009.3	72667.9	60384.9	47823.9	73305.6	71320.6	60170.2	65312.4	64851.9	86864	77728.9	44291.4	66199	64956.2	65229.1	59376.4	57110.9	78598.2	74495.7	54362.7	77449.4	57950.5	75524.5	36561.1	51327.7	59247.9	63462.8	40334.6	41399.2	61244.6	58635.7	39642.5	35119.4	49219.6	52916.1	36483.1	47026.4	65389	46857.1	44029.3	53867.9	56206.5	56335.8	57001.4	93512.7	86175.7	78507.1	48546.7
O95544	67611.4	71203.2	99731.6	74691.8	80011.9	96393	88205.7	87737.3	79327.6	67893.6	68833	106538	83224.8	106549	78823.1	68697.1	105197	96397.2	90182.3	97933.9	105651	105690	72652.2	72215.2	56892.6	68990.9	72006.2	65573.4	83835.9	79539	88259.6	98233.1	112031	67260.6	90039.1	100957	42984.1	56295.4	71871.9	45012.6	63080	61238	63688.2	76861.9	73618.4	104343	87205.8	95452.7	53130.2
O95551	48315.4	44163.7	81648.4	62523.2	50523.9	81523	67115.6	65649	89120.7	67935.8	107488	98995.9	43457.4	60213.3	62709.9	67177.8	55439.9	52850.6	83163.3	72963.8	53597.1	74831	76264.5	91378.7	38421.7	51317.4	62717	61610.2	40439.5	46895.9	64191.7	59737.9	39434.6	34094.1	51044.4	59087.5	30730.2	35896.5	53823.8	39091.1	41236.2	39303.1	44551	44481.1	52928.1	68787.3	73186.8	79166.7	35786.3
O95562	33284.2	10602.1	NA	45682.2	33411.3	53041.9	4494.92	NA	43109.7	NA	49310.8	1861.82	10436.5	58329.9	44852.2	47136	40614.4	NA	49128.7	NA	4445.14	4464.37	5598.47	53746.2	33742	35151.9	40271.9	41881	27869.6	5264.06	38431.4	28358.7	25638.2	NA	32211	NA	137887	48482.1	4082.47	35846.4	46081.1	5766.61	111855	50331	152813	136913	126227	41675.7	148092
O95563	101918	83787.1	184787	122873	102428	155608	99677.7	136938	133964	96701.9	179424	122684	89282.4	163723	148439	139601	128182	118352	193824	170877	89973.7	120045	134341	170438	67094.3	84269.5	88743.5	114766	94356.7	62972.2	142794	143888	103270	79522.1	133787	125675	97915.7	97230.7	126600	91519.8	99555.6	100450	106593	110586	109810	201252	172706	171763	129228
O95571	121364	92583.7	148686	112530	116948	144762	120935	113175	127522	109945	162384	161980	85968	124114	105953	96876.4	128695	94151.8	131106	127812	102617	98853.1	102548	118783	78904.7	95493.4	119956	104222	106993	93237.7	134834	128562	130332	88263.6	141540	133053	105099	101574	121221	87754.3	101461	101370	105894	105224	99767.9	155433	137185	108797	127082
O95573	122943	100776	145662	140842	98902.5	146613	117776	122938	146029	111570	202943	168649	122264	236005	190996	174247	163343	140749	198906	166301	132151	144874	163136	220718	91057.7	115303	137575	140382	94817.1	95782.7	135169	125483	89844.6	76087.2	113495	116174	85458.9	100789	135441	93590	91351.8	95075.4	95500.5	95304.1	102698	153187	157066	141437	109146
O95602	68610	57227.8	88761.2	69735.8	64006	89415.6	82011.4	78401.8	89665.2	67555.3	99121.7	98447.5	47539.6	63425.7	60716.5	56604.3	59632.6	50034.6	71188.1	67073.5	60631.8	60687.5	67285.3	71192.5	48765.4	59020.7	69371.8	72486	43881.9	47407.6	59895.7	60970	39837.1	32862.6	50614.2	56022.6	36779.8	42666.1	62629.8	44332.2	48341.9	47897.6	53536.7	57749	57793.8	81908.8	74899.3	77025.6	40505
O95613	30295.2	31731	23870.1	32180.4	47791.9	59838	32898.2	42188	56201.2	21575.1	60022.3	47814.1	30266.9	52848.4	39121.5	27666.6	63613.7	27042.8	37424.1	40672.2	55224.3	31230.3	NA	50244.6	18005.8	28557.7	32996.5	33831.4	42883.3	15986.5	29060.3	21947.5	20827.6	7543.7	NA	9899.77	26081.8	22628	47252.1	22001.2	28716.3	32507.9	29414	34022	44541.6	84116.2	45576.1	47199.9	22598
O95619	124583	110913	224455	126470	122444	178711	NA	NA	168767	NA	166051	NA	84314.1	124398	131396	125763	117623	69191.1	147332	NA	211910	164106	NA	115077	85297	100677	134437	140679	98276.5	107854	116057	114991	88887.3	NA	101731	NA	91682.9	82375.7	106168	120753	120626	125347	161503	129194	158766	186771	166975	178059	107146
O95630	82697.1	63613.8	91241.6	79066.1	70891	90462	83221.9	76232.9	90170.8	69789	97539.4	87731.5	68330.1	99769.6	83184.5	83557.4	88558.9	75378.4	101476	83220.2	78168.5	75353.3	69847.7	109383	57077.1	70442.8	84825	79258.2	70489.7	62872.3	84873.3	81599.1	67307.4	54891.5	80174.9	82418	64121.5	81343.2	107736	81743	78378.2	81409.6	92539.7	90662.6	85111.9	122767	109552	98791.4	80709.1
O95639	87244.5	43148.9	49060.2	82747.2	72631	109410	45759.6	27304.3	96728	30932.2	110502	100874	43658.8	110211	68537.6	74441.5	88798.2	35453.1	79604.3	78978.8	56246	53773.4	31519.9	96654.8	49438.6	58964.2	66139.8	77339.1	59710.7	31722.3	77717.4	85673.3	57474.1	26679.1	68708.6	14672.2	57544.6	63091.9	93020	57108.6	62319.4	61701.7	69502.8	78144.5	78336	159093	103074	104031	66777.8
O95644	155234	120828	197829	152211	122893	175468	166932	145017	192660	163564	213952	217460	225430	317812	265337	253120	263976	220632	308781	283019	213944	200281	238985	294042	102667	139284	162094	166663	NA	92097.5	144939	152605	106280	85841.2	135347	131915	111327	121149	165130	112125	130822	119163	132058	149207	124134	145042	181662	153760	124971
O95671	49483.8	41831.4	75239	48106.1	42307.4	55283	51642.4	53733.7	53803.9	69124.6	71991.9	70893.3	54025.6	60380.4	58364.6	53880.5	57969.2	64661.8	68466.5	60058.5	50360.4	59899.6	73292.2	59261.9	32431.2	37034.6	47999.4	44989.1	36049.7	55222.4	43269.9	40761.7	36595	36767.3	46579	47364.5	74539.3	72896.1	96762.3	60242.4	86029.3	75497.4	84395.5	70581.1	80692.5	126166	109183	89642.2	91632.6
O95674	46537.8	42926.9	51985.7	41104.7	39887.8	49780.5	41589.1	40091.8	42655.2	39995.2	56567.7	43571.2	51095	55459.6	56285.8	48261.6	44051.7	67951.9	67139.3	92732.6	52703.3	53362.9	51533.2	60383.5	32649.6	36709.6	34847.5	43076.2	44248.8	39002.2	50116.5	52234.7	41579.6	28521.4	42834.3	29388.9	34053.8	36882.9	38592.1	29717.2	39247.1	34996.1	39440	33878.8	38227.5	55919.3	44844.7	45838.4	46602.7
O95684	62449.2	56411.4	76411.6	62187.3	54349.7	85349.6	78877.5	68523.5	84618.5	69485.4	79248.7	81754.5	57756.2	77954.6	63954.8	57137.2	65309.6	60186.9	81756.5	68216.2	77198.2	75266.7	80063.4	69269	37387.6	47363.7	52034.3	65121.1	40640	51778.6	42677	51516.7	22523	NA	25672.3	32800.5	NA	51523.2	84226.1	50270.5	53797.3	52755.5	65541	60924	72979.6	116311	103253	97607	38493.3
O95685	51644.8	NA	NA	76242.8	64189	NA	NA	NA	NA	NA	115135	NA	NA	NA	NA	74518.1	NA	NA	NA	NA	NA	NA	NA	119194	35978.6	51671.7	NA	78162.1	NA	NA	NA	92034.3	NA	NA	NA	NA	NA	57550.8	37760.5	23547.1	19561.3	169587	172219	26174.9	NA	NA	48665.2	37159.2	132584
O95707	73654.7	50953.2	66087.9	66472.9	60217.2	82966.8	66079.2	62026.1	79916.7	57800.9	90652.7	85399.4	34398.3	76335.1	68126.5	59538.3	68637.5	55446	86641.1	71372.7	54167.5	68249.9	46671.2	82249.3	42986.4	62475.9	63631	67659.1	50058.5	37492.7	72165	63620.2	46274.5	26502.9	65390.5	53467.2	46701.6	55835.5	64790.6	51544.6	62553.9	44162.1	57031.3	56273.1	90380.1	94680.7	83804.5	58414.9	52910.1
O95714	93669	85032.9	160541	123383	80165.8	132894	131562	139354	128112	104529	132392	139939	84645.4	117927	147617	104579	90315.3	90482.4	151073	156901	120403	118903	123525	134238	56835.6	83595.3	150674	117634	41715.3	70299.1	117989	91755.7	58413.8	65075.1	106904	106171	77084.7	70655	129202	59376.8	101698	79330.3	102492	103849	107187	157300	146794	142950	76802.1
O95716	83889.9	78821	98639.3	97652.6	90703.5	124136	108413	85901.6	101372	95793	144638	120511	95423.7	143276	116272	109105	119485	96814.6	125584	112897	111182	119498	131652	123176	66089.1	87396.3	92444.1	96301.9	62416.5	75362.1	101806	88201.8	82439	63885.5	97617.8	96538.6	49726.9	53463.1	83755.8	64414.9	54568.7	60045.2	71172.5	83679.7	73180.9	124753	115585	111192	62225
O95721	54911	61287.3	101817	69130.3	57404.5	92828.7	93966.8	85463.7	79067.7	69740	90521.2	106671	60834.4	86056.9	72111.5	66158.7	69932.1	82495.3	88508.9	74092.8	76924.1	102938	76425.6	85895	36854.3	47101.9	65866.8	64763	44598.2	69551.9	65761	59082	38391.3	43971.1	48904.9	79919.3	54073.7	67328.4	112504	70778.2	68823.5	79643.3	97423.2	90098.5	88908.3	142931	132610	106435	67378.7
O95747	139424	110961	193627	161877	124204	166808	164092	158633	158673	140298	216264	201568	98682.2	150830	163707	150780	125043	119382	193683	179571	129637	148139	146491	187556	98912	117994	149837	157152	113193	99600.7	167411	162771	107896	76713.5	154915	143671	112822	131271	179480	133309	131614	138486	147288	157219	138415	215673	203019	187190	141109
O95749	39419.4	25355.3	NA	28041.6	32298	35532.2	33191	NA	41044.7	32107.3	43815.6	58654.4	25382	43431	35500.5	35097.9	37368.7	32976.5	49619.8	41030.5	33098.3	34611.7	30053.9	44922.6	23540.7	27371.1	39205.7	NA	26399.8	24379.2	40231.1	36784.9	27249.7	24792.7	43225.9	NA	41531.9	18724.2	74003.1	48899.4	49155.8	60957.5	67228.6	65402.3	49519.7	83614.3	75999.1	62026.8	51897.8
O95757	200593	162522	225170	199655	176547	242140	200846	212126	230399	192413	246402	247528	137646	198492	181473	170889	174687	159610	197187	195653	170593	184476	176497	235755	136473	174799	198196	207317	132065	154068	181240	185262	127622	104471	154923	160038	71462.7	89865.3	141998	97788.1	98239.2	108801	116692	107561	123034	183394	176949	162422	88581
O95758	102828	85076.9	94168.2	95603.3	92301.8	123659	108352	105851	109670	88397.9	122058	106992	105369	170532	122944	122080	127429	118226	149081	121402	125389	130378	106920	148405	69517.5	94480	97627.5	94267.1	85133.4	84950	106233	109137	92205.7	58942.9	96431.2	90930.2	133568	152240	207369	121471	153674	158662	148765	146356	161985	251316	191061	186586	192893
O95759	NA	NA	NA	33884.9	NA	43457.2	NA	NA	NA	NA	53883.3	NA	NA	NA	30660.4	26305.7	38472.2	NA	36059.2	NA	NA	NA	NA	NA	NA	NA	32312.4	35279.9	39408	NA	39174.8	33927.5	27456.9	7258.33	30297.4	NA	NA	NA	NA	35136.4	NA	NA	NA	74271.6	56481.9	NA	NA	NA	NA
O95777	505825	344755	482304	526259	420581	565766	517953	452629	543360	484652	703177	524694	314961	468196	441143	454585	419062	347226	515263	362337	391904	497033	432591	508976	322655	427044	510560	528265	374085	359178	539866	499238	343304	301243	473189	431316	271944	305885	454220	306485	313596	352124	362040	385264	382109	554046	514172	529580	296600
O95782	140859	120724	199597	152045	129103	181413	173423	189618	160388	146827	202861	202123	133940	184000	167089	158220	156753	150950	191510	192687	158574	168912	165855	192063	97368.5	118557	142862	146509	119280	122521	167916	164065	121623	108430	166204	172905	117565	132020	181372	124172	133504	147907	157383	157056	156049	239510	204356	177609	140809
O95785	51712.3	47328.6	107509	73613.9	37595.3	94212.4	92567.5	91799.3	73285.3	65811.9	124379	91085.7	53455.4	70343.2	77822.1	71714.2	57463.8	71933.6	97469.1	87070.6	50351.2	94724.7	85132.4	96731.5	30189.5	47408.3	70823.4	72602.9	38707.7	58693.1	68465.1	71349.8	38506.1	45498.3	54177.5	59310.5	51126.2	73013.5	115040	77629.7	62570	87096.2	89856	90501.8	85092	147634	132890	127335	68093.4
O95793	73027.4	67150.9	92560.2	83959	67166.1	102200	91959.2	86558	92397.6	71597.2	94424.9	99344.6	67587.6	86112.2	79089.4	79007.8	76746.1	63378.7	91476.9	84423.9	77931.4	72279.6	71734.8	97019.3	51682	73621.8	82693.5	90308.1	50711.2	65549.4	68695.1	70776.3	41535.9	41844.6	63790.5	70930.9	68716.8	88001.7	134543	91108.6	80674.8	98887.2	108036	109229	116988	156682	156069	142417	80181.1
O95801	92226.7	76888.9	120229	107719	100677	134374	100652	109791	128868	121995	115428	123959	78428.3	109936	100256	105955	94984.1	75802.1	111825	96829.3	91238.4	96766.9	104900	120914	64068.9	87402.2	106834	108795	61408.4	66930.3	91458.6	74788.4	45108.8	36881.6	63767.4	62871.1	52702.3	73065.1	116917	82301.1	74992.5	77959.4	95244.9	96447	92251.2	133828	127610	131329	65492.8
O95807	75318	57056.8	62115.9	72170	77302.3	90280	63377.4	64590.1	82435.2	71999.4	94054	78469.8	40124.6	54289.4	51709.8	51545.6	55930.2	33414.1	66998	52687.8	48353	55200.7	54569	42282.8	61882.4	30005	50566.1	60016.3	61099.1	34036.3	52753.4	58431.1	52730.9	32362.2	44938.2	44365.7	57586.4	65141.2	61354.5	52870.5	51618.3	46240.3	57225.6	71556.8	55477.7	83735	84223.8	76342.9	45375.8
O95816	123502	100783	170182	143424	110216	167326	158715	153605	146323	115886	190074	203673	107726	151766	133617	130064	125125	123735	153396	172023	128795	149265	142872	167857	84399.8	112727	137328	140023	85310.7	97419.2	118362	115215	76229.4	84068.6	113392	133401	35426.8	33486.9	57017	40325.1	38703	39065.3	44472	47632.2	51250.2	74100.9	81567.3	76829.4	50391.9
O95817	33481.7	28551.5	NA	42570.8	32268.2	50316.2	39244.1	NA	44921.9	NA	58006	NA	32366	42938.1	44027.1	41647.6	40373.1	19704.4	56192.1	NA	36966.2	37411.1	NA	47983	24215.5	31720.5	41816.4	46341	25416.8	17111.4	38956.7	30761.4	NA	NA	31495.6	NA	45209.4	25123.5	46052.9	37749.3	25672.2	34013	35847.2	48298.1	67895.8	76840.5	76475.1	71134	42970
O95819	45559	39526.9	56758.6	48758.1	41954.3	64337.7	55031.2	54022.2	61019.3	50174.1	75700.6	86362.6	40076.4	51558.9	48336.8	44419.1	44729	42911	55164.3	64009.1	45513.9	54822.9	48605.1	55842.4	28939.7	42148.8	44249.7	48735.9	31590.1	38288.5	44374.5	41164.1	28076.5	25061.4	38577.5	40907.9	35047.3	52181.7	72455	48071.3	46328	51236.8	61461.4	54977.9	67797.5	102443	93658.8	85925.6	48144.5
O95822	38778.5	34372.8	47876.7	36919.6	34854	51371.5	39133.2	38885.3	43207.9	41510.8	62228.6	54772.5	42206.7	53761.1	49038.9	46213.4	46058.1	53709.8	52245.4	62527.7	46370.3	49906.4	36797.7	59184.7	27215.7	33740.2	44077.8	34358.4	34808.2	35515.6	43458.6	44706.4	42874.1	34185.3	46061.9	61510.5	37289.3	39699.3	53578.2	34310.4	44578.7	40784.4	43432.6	45730	42596.9	68351.1	64149.3	61395.3	51323.4
O95825	46666.2	39984.8	137587	44628.4	48582.4	60325.8	74733.5	131266	53339.7	45874.3	65660.5	NA	43773.2	63456.9	55509.8	53609.7	54161.3	53542.7	66203.5	63410.5	49479.8	58978.7	50836.1	66450.8	32118.1	41746.1	42558.5	47659	39013	50243.5	53127.3	47302.6	37141.8	26590.6	48457.5	52225.1	122010	41631.8	53617.6	38467.1	38517.7	43624.9	48403.6	51778.2	46916	79805.7	70394.3	71015	46002.4
O95831	147245	121306	167092	161119	141282	191206	161424	150377	179285	144777	178416	182416	140806	202766	180510	171397	177468	149645	210974	168310	160151	180165	153461	209420	106661	141909	155213	165418	130103	142872	184502	183511	148905	121755	185513	171362	118768	138318	193941	136421	128259	146391	165749	155117	158889	235460	225108	206270	177038
O95834	101905	72599.3	103497	104191	99993.5	125765	99021.9	104939	118100	76979.8	146007	125479	90557.5	140513	117287	119640	119950	95218.9	143267	105894	102229	97325.3	93460.3	132729	74196.8	90604	98954.9	102237	90263.2	79059.8	118975	112233	108175	75585.7	117857	94579.3	91526.8	93369.9	119056	78355.1	100215	103211	105530	104489	97367	152293	136942	125171	97414.7
O95848	77207.6	NA	NA	83411.4	NA	NA	86601.3	NA	NA	NA	NA	NA	NA	63062.7	NA	66866.4	NA	NA	NA	NA	NA	NA	NA	91669	NA	77459.2	189192	NA	66208.3	NA	101931	58004.8	62172.7	NA	102958	NA	81066.6	69579.7	134498	78243.1	46232.7	89649	98095	106581	90482.8	197472	97713.5	107655	107724
O95861	91143.5	75063.4	113276	107655	84893.6	121111	94367.5	99105.8	95569.4	85546.4	141716	103820	80090.9	119306	100086	96908.6	95833.6	84061.1	120543	98934.2	83300.1	92565.9	89145.1	113517	69423.2	87277.2	105698	101239	75256.3	80222.9	109844	105028	74958.7	72994.5	104567	92746	46455.6	58336.2	85095	59800.4	53267.4	68064	69903.9	70567.6	66485.2	108526	105255	94925.3	67733.7
O95864	126290	106082	153420	142591	63738	104470	118950	79010.5	117241	125913	195615	101097	89351.6	150572	119799	119748	49784.8	52316.3	81365.2	61074.8	91656.5	114618	126279	219052	85273.1	108661	127367	141126	34710.3	51848	50829.1	48348.4	37432.5	NA	NA	43659.9	161548	206144	362741	257519	131083	129118	153431	141798	213196	275187	397226	328720	156892
O95865	59525.4	72072.2	111731	69905	56591.2	65669.2	77789	80063.5	49024.3	53524.9	87059.9	87396.6	60538.5	94646.8	83179.9	90635.2	82474.8	86566.6	109828	113574	68777.8	89200.9	77198.9	106282	37971	56390	64915.8	66933.2	54024.6	63570.4	81437.8	72064.5	53818.9	49132.9	73746.1	89208.1	84073.7	102973	123745	79018.3	84367.9	101873	98666.6	85001.1	85025.3	165766	118984	80181.1	92869.8
O95870	107528	96336.3	157227	105068	94143.4	127978	109838	150517	112335	116249	138400	139625	84921.4	127257	126201	111273	111975	109629	150799	119827	113713	118778	124480	118511	72839.9	85950.4	113019	101604	82281.9	101292	113199	116528	102191	88701.6	106562	126471	54238.9	60556.5	82657.3	51588.3	69050.9	63800.9	68579.3	74175.9	71778.6	92057.1	98244.1	86871.3	62252.6
O95881	276193	180002	249952	253926	226876	326321	196044	238776	329038	208487	419134	327261	146170	269156	222437	194850	232237	158828	295925	229746	170410	207725	198434	293728	163624	210400	255913	264521	186982	153140	264713	251937	178367	151881	238875	206006	139290	163075	265274	166223	167820	177283	194388	185901	210896	345699	308301	282242	162728
O95905	62672.9	45398	57211.7	32773.1	47756.2	70417.1	54923.4	40780.4	56107.4	37519.9	69925.2	70325.5	NA	62314.4	35006.8	49561.4	42484.1	NA	54301	60912.2	102848	NA	60673.1	58868.2	34908.7	49671.4	NA	NA	22301.9	NA	61509.4	33935.1	38261.9	NA	41069.8	47736	NA	70025.9	53306.9	43214.9	42212.2	42652.2	57384.5	49057.4	45564.5	69716.6	66399.6	69625	31170.7
O95926	69709.8	85047.4	NA	95363.2	69630.2	115227	67454.4	NA	115555	110788	188937	NA	80700.6	115323	144788	110226	80577.4	92747.4	120807	99905.5	81195.9	106793	78803	97077.7	53272.2	62761	65766.7	68213.3	58360.4	102649	118557	83985.1	56593.2	NA	55698.8	NA	36413.1	132365	37528.9	123303	104500	70066	80788.2	82097.4	73600.5	101888	108242	131620	45611.6
O95983	87872.1	69481.9	146090	99546.6	78688.2	118063	124274	140104	114960	92038.2	138036	147648	82254.6	108795	95940	92231.3	90987.6	86542.9	105003	117984	94258.7	96856.1	105158	113621	61479.7	71024.8	94571.3	101254	67475.5	82610.9	94815.3	94170.1	52458.1	49240	82347.3	132060	61616.7	83424.5	115959	78445	70201.9	84016.5	100347	91834.4	109149	160487	158251	149582	76435
O95989	231086	202213	307342	288945	200966	394676	297073	277324	299064	264447	498673	358155	235221	296407	305417	333412	231656	247510	401698	281504	279804	296840	275863	385325	190624	229561	322107	332501	206181	229606	323507	362471	187972	188314	308501	249876	258083	230714	293108	244953	221263	249886	269794	262002	230545	413007	415294	380373	240891
O95999	63780.7	50739.4	76162.2	55061.4	57041.5	79006.7	69133.2	67029.1	70032	58625.2	78044.7	72428.8	51489.6	72975.2	65664.8	68057.5	59257.2	56257.3	82421.9	NA	56949.8	61273.7	71681.7	80802.9	45634.1	45383.1	31243.1	53409.1	63122.9	49731.9	62997.8	65171.5	59516.3	45326.4	84308.8	78305.3	53579.9	58703.1	60907.6	50571.8	56823.4	42243.4	44610.7	54724.1	65174.1	73525.8	83265.5	57903.7	55379.8
O96000	169488	134420	227455	189422	172660	221157	218081	239139	222158	181116	284279	260172	183118	254483	225394	207537	232138	197322	282644	303132	217666	232439	233193	276259	123291	157521	186967	185110	157129	152172	219546	218837	193525	167121	235339	279465	145029	147063	204885	135649	186114	169585	174667	185031	182431	311711	245871	243176	200647
O96005	70219.7	62471.4	67383.8	85361.6	79702.2	135730	93823.5	68673.3	100753	55519	102366	42839.3	66106.1	100383	77742.9	78978.1	77357.8	63968	105280	62105.8	84283	97736	99927.7	107880	48976.8	69776.5	70365.5	84217.7	47417.4	58766.1	73300.3	72561.6	40920	31923.7	58388.1	39962.8	41833.9	45719.9	86138.9	48015.9	58836.9	68458.1	78228	64187.3	90013	139883	105108	88021.4	50526.8
O96006	20667.4	18496.9	23712.1	26166.1	16351.3	35624.1	20696	20449.4	25956.4	16834.2	26523.4	20862.8	15590.2	22617.8	20238.8	15504.2	23491.1	20344.1	27330.7	17563.7	23787.2	18172	12555.9	25723.7	9709.58	18537.4	19000.7	15757.8	17288.7	12108.5	20356.1	17993.8	16764.7	14106.8	15645.9	17767.4	24087.8	22036.5	45562.3	23096	29253.7	31304.9	34257.7	37068.8	36614.7	64072	52919.4	48387.6	36134.3
O96007	44905.7	NA	NA	74548.9	NA	61292.6	92232.6	53096.9	35061.5	NA	NA	NA	25835.8	40860.5	NA	57267.8	39897.8	90199.5	79923.5	48920.1	49622.1	42619.1	NA	83771.2	16602.3	34698.9	107854	NA	NA	NA	63915.7	NA	NA	NA	NA	NA	11963	7991.73	NA	19280.6	9044.89	NA	28002.8	20730.5	36016.7	62375.7	79985.8	86655.8	42049.1
O96008	121375	93659.5	134965	150384	130183	189950	120111	129525	162425	129381	216895	185421	97405.3	167853	142130	132621	151938	108800	171598	177182	117374	140726	124886	166151	93084.9	128785	139449	141727	114994	95165.8	145828	147220	127099	91364	140223	184893	78322	91446.2	139868	91391.6	106170	116484	112606	115680	118425	184600	171416	169885	112788
O96011	62823.8	66605.1	124505	60561.1	60966.9	70537.7	90859.2	75509.9	68033.2	72469.4	74560.4	80846.4	88010.7	84370.7	84478.5	73672.1	76947.8	81404.6	89310.9	139860	92123.4	88476.4	95050.4	74756.3	44952.1	48614.8	49844	54907.3	61734.2	68948.8	65785.4	69268.8	73687.5	75406.5	79546.7	104696	51051.6	53750.3	70629	51189	52646	59301.1	62352.5	67433.5	46475.9	96855.9	72794.6	80308.5	76474
O96013	34855.5	48987.9	NA	37799.9	30971.4	59988.5	NA	64091.3	59972.1	58989.9	81135.2	104674	NA	44321.3	37443.1	38707.6	45107.7	52124.3	45489.1	72764.6	58957	71273.2	NA	51783.1	24939	36317.6	42693.2	32238.8	24361.5	51012.1	NA	31391.9	22186.7	62359.8	NA	95020.9	NA	25862	61440.1	28690.7	23789.2	34250.7	29604.4	35605.8	47945.1	76612.1	49999.6	52242	27609.1
O96017	42704.1	32038.4	41044	51472.2	40146.3	59258.2	53329.8	115512	55251	60239	61519	73833.9	37380.2	59807.3	48988.5	46230.9	44875.5	36797.6	55700.9	42141.7	41495.2	59610.2	87054.9	54352.4	30739.8	39830.2	49826.9	45390.6	34832.3	37633	40829.4	39643.3	30209.8	26572.1	34830.2	63368.4	35630.9	44924.5	60315.6	49378.1	47173.9	44387.6	48495.5	56171.6	60257.3	82600.7	74132.3	71503.1	47331.4
O96019	154756	108506	170079	160168	137132	185485	136020	145653	186451	132724	219005	170176	100984	156438	137309	145194	134951	100589	172312	131227	132163	129080	120267	178715	103368	132367	146726	158171	113792	105690	152994	146704	99260	94393	128578	134152	135439	150809	221901	154166	148503	162279	171831	180509	187623	260816	272599	249331	141836
O96028	26693.9	18345.7	20998.9	37199.7	24291.6	42384.2	28271.9	34268.8	46781	31160.1	49526.4	NA	15048.1	18616.7	23290.7	25425.2	21014.9	18448.1	24850	13511.6	21562.5	28763.3	24310.5	36378.5	16058	17984.2	24444.9	33485.6	13695.1	11581.2	20648.7	16644.4	8633.32	NA	6274.7	NA	22760.8	20004.2	33702	30978.6	25950.9	31584.3	41335.4	32786.6	53406.3	79058	83310.8	77942.8	22220.5
O96033	NA	NA	NA	83614.2	NA	123111	NA	NA	89546.1	NA	NA	NA	60950.4	118496	71629.5	76515.2	NA	NA	92375.6	NA	NA	NA	95677.8	NA	NA	NA	111938	79758.9	NA	NA	57917.8	NA	56594.3	NA	NA	NA	NA	NA	52140.3	30076.4	37211.8	22984.9	33660.8	25942.2	64916	40187.4	33876.7	20750.8	56218.4
P00156	185791	151324	156194	179907	188886	177965	36041.5	NA	197337	151780	185916	NA	67292	172982	164492	157537	148282	62610.7	247743	39077.6	197681	NA	NA	186019	125924	134804	89327.1	159183	177515	NA	194269	194392	238866	NA	194593	30411.5	183342	51580.8	35288.5	110564	127394	105948	120606	127475	116508	198344	140298	142024	166983
P00167	48020.6	45609.1	54504.2	60356.1	55047.6	75660.9	66531.1	69089	66279.9	53102.1	99698.9	66053.2	47794	69159.3	76561.4	73479.1	67895.3	61119.1	86782.2	77217.2	67475.5	70287	79926.5	96153.5	40194.4	44290.3	65701.8	57655.4	40966.8	53913.1	55307.2	61120.3	45661	46121.9	76297.8	68221	64899	81988.7	130971	85179.9	76366.1	104088	121503	103985	112954	193565	166554	136920	120082
P00338	531239	307854	512525	547172	411759	590486	406843	366400	475433	336339	587140	400472	214404	378152	426732	367081	335295	220430	500799	352454	250681	300529	273506	486843	358534	464667	558386	519357	362545	265727	505397	471153	269743	167404	409339	235880	243660	391062	496061	415505	282573	354349	394543	440301	377234	500585	523802	519012	237943
P00367	237303	161604	262172	226294	223963	274288	220829	206984	268864	181352	351229	319728	215493	345764	307879	285905	307611	252465	386720	302765	235283	273495	247764	356394	162407	198601	241224	228485	214027	196226	266179	271067	285312	204040	335244	284348	240924	243443	339017	229831	264758	260402	281882	276364	246434	423539	363567	327524	313427
P00374	102565	94401.1	119428	140555	99180.4	161816	148082	116118	150134	108904	172543	92343	82772.1	101903	89070.1	109909	71329.7	78078	123742	47990.5	123644	126208	99183.4	149593	75371.7	113706	140104	128823	62250.2	69091.1	96192.4	102549	42761.5	43368	54699.4	163704	90492.8	130282	222097	155443	138722	150493	195173	184735	210375	279785	302889	287429	123170
P00387	196231	151632	231548	197084	188588	239098	210158	201049	235698	183403	298718	262233	156039	255372	215241	211964	239310	214607	271954	230458	203603	250237	201904	277511	140852	170657	204521	192396	187066	184686	221189	225865	206726	170295	241420	219585	151585	174916	251217	155409	196633	190204	201667	211512	195597	356173	272543	262391	238172
P00390	228421	163867	261233	245615	213205	279535	230388	223864	243078	197306	377425	301086	158983	242279	224471	203616	233473	179843	264620	244759	188417	214531	175898	241124	161510	190060	236819	235950	191526	176411	260007	255707	197058	148944	253491	219573	58023.7	72240.9	98879.4	70062.2	64837.4	83292.2	79734	85056.7	69834.8	129959	101495	95680	84682.1
P00395	72169.2	NA	NA	83382.5	129532	100171	68869.4	NA	113491	NA	78087.8	NA	NA	75401.1	95567.6	74494.4	140023	NA	78920.9	65535.2	NA	NA	NA	83198.6	62783.8	49074.7	47141.4	81687.5	115775	NA	80807	81533.7	58810.5	NA	58383.7	87052.3	111230	22166.6	51860.3	40767.1	41745.9	33440.5	21633.6	28691.9	101554	151669	103006	95444.9	93610.3
P00403	218112	146277	349952	245060	204817	281609	177683	300748	286498	200250	333753	348900	107259	224182	221052	225007	203394	196138	288173	261827	113009	152663	174765	248253	160529	190561	226737	235854	214019	176346	288738	273890	262999	167334	294015	298882	162789	135564	174895	131580	165321	141829	148993	162222	139743	222457	200192	207113	144355
P00414	14781.1	4957.05	NA	18881.3	15128.1	16881.3	2052.92	NA	18599.5	3105.42	20486.6	NA	7742.08	16391.6	18445.7	15277.6	14948.3	NA	16899	NA	1386.25	2321.44	4238.87	16200.2	10977.9	11873.3	12920.7	14935.3	16662.2	3852.34	24100.3	21581.4	20184.6	4085.5	19510.4	NA	27964.8	18399	13553	12695.3	17258	14328.6	15958.6	13663.4	17416.8	19195.1	18112.6	16601.8	17136.2
P00441	602820	365265	570817	670307	516076	694505	516867	425954	494218	349638	674865	418726	402160	632144	602527	554757	536579	386250	702596	442640	395689	461448	352294	517955	414617	474440	597089	580089	522021	430882	696940	662645	522139	280681	667939	349798	415855	525654	763075	568452	489543	620931	662066	669082	550631	869800	722310	608104	627527
P00488	27062.9	22411.2	30520.6	42700.2	38397	51351.5	45630.3	24009	30099.6	25618.8	50560	16643.2	56091.6	71719.1	73561	66598.6	85635.1	59536.8	90266.7	68888.9	64450.7	70920.6	75015.6	90810.8	24448.7	28053	36024.4	34358.2	39548.9	37651.2	58793.5	50930.7	56094.3	56008.1	81872.9	80625.4	36494.8	53704.8	94652.2	56413	52949.5	68354	80512.8	80101.7	74366	187443	115758	78076.7	153877
P00491	344276	230544	344027	346469	300203	392363	322693	297658	375644	259795	446767	353802	207140	364482	322976	303169	320548	212907	390902	285863	237689	279340	244794	378559	246859	315426	349108	343571	253966	213765	346544	329379	210126	150403	284484	229317	205025	292811	422522	297245	265279	328686	373498	357153	314848	462139	465561	419560	246743
P00492	260574	207804	282353	275158	232097	329636	260650	233213	327780	236347	450254	289806	205626	295397	260894	255795	245856	201495	305833	246640	243070	237790	224493	329472	174486	228663	281912	283381	182597	195827	264337	257147	147508	142809	212218	204132	222028	296910	464030	320708	281311	297502	346516	373215	368959	542380	543926	564501	254031
P00505	192786	176935	267285	211957	195470	263143	218531	251223	265420	211180	319090	360718	173478	262961	210365	211551	245834	201963	247135	250389	210852	229729	212010	257504	146041	188596	212956	205456	184302	176687	237261	237353	222371	175571	250070	269911	115542	110618	164344	116532	114067	128016	137249	141776	145629	230685	221054	217751	134927
P00558	631542	390348	642680	542880	503069	592644	518904	506921	504552	430887	629274	606205	299746	460324	467017	424944	455667	325555	556605	390415	346059	403613	352691	530553	452893	487620	599339	537303	483588	389241	574975	544296	417227	257549	517534	437825	410448	549216	638045	516360	440007	538309	536047	551949	470168	735454	631917	533582	419754
P00568	65125.6	82348.5	119380	91257.5	77589	104320	145585	109736	90951.8	107078	122916	136280	75100.9	95287.7	93377.2	75766.7	83820.7	105624	107551	109502	116690	107822	74744.4	91352	53394	71695.9	100711	82855.3	68612	89512.4	109016	103648	77245	80345.2	100469	137909	67515.6	68189.7	90509.7	65515.3	81991.2	77878.7	85484.5	65869.4	79537.7	124556	119894	97940.1	78779.2
P00746	148646	117078	150388	131725	204956	187133	143655	121459	131903	111551	158356	128506	92379.2	131684	109585	118222	261781	154063	202157	146343	146505	141242	125229	143729	99668.3	141040	144153	135643	339415	246849	317162	318865	538389	262827	406774	286498	58391.5	75900.9	105973	63561.1	100657	114972	116340	125072	118489	256802	132442	93560.3	102735
P00749	NA	9556.64	16061.1	17356.7	18699.9	21134	NA	NA	18846.4	16048.4	17871	NA	12671.6	25092.2	22327	21105.7	31266.7	21372.4	37829.9	25510	25936.7	30449.1	23738.5	44712.4	6419.98	12080.2	15364.9	13963.3	10841.8	7832.91	12666.1	11254.2	8534.01	NA	11691.8	8609.22	NA	8243.51	10925.4	5400.78	11786.2	15404.9	15732.3	13986.6	20379	26283.4	21047.1	16353	4262.85
P00813	65963.6	74060.6	118651	72656.2	65924	92914.2	114879	91512.9	90923.4	96544.2	111697	134909	82649	119022	106348	94646.7	99135.7	114150	114342	128535	107542	141104	104798	124571	42305.1	59416.8	69099.8	73252.9	62925.9	80658.4	78966.9	78979.7	72903.4	74131.1	85529.1	101656	73131.8	84923.1	125084	81425.1	75200	92411.1	99477.5	102806	94099.3	177787	158135	130225	203235
P00918	743605	431608	814067	585032	561411	848232	458976	609407	566500	355224	819802	686080	98532.7	158610	57557.6	81786.3	239465	71971.5	92739.5	40828.7	68510.9	70409.2	39494.9	49859.2	498728	535789	594151	576195	507691	566161	641369	639303	456187	363669	539488	397482	NA	NA	NA	NA	NA	NA	NA	3237.81	NA	NA	NA	NA	NA
P00966	148431	116524	201815	145988	121857	176601	144122	155017	282455	257748	402688	365875	104729	141193	142559	132929	117438	111762	163916	146958	133092	161994	144820	211445	104273	122603	159943	144370	107467	109391	160274	143772	95719.6	83250.6	140934	140035	216405	186502	283374	181162	212663	198882	218637	212985	269060	376774	380222	339697	93188.1
P01009	NA	NA	NA	NA	NA	NA	NA	NA	NA	NA	NA	NA	NA	NA	NA	NA	NA	NA	53575.1	NA	NA	NA	NA	NA	NA	NA	NA	38198.6	NA	NA	42478.7	NA	NA	NA	NA	NA	NA	NA	NA	63125.6	NA	19615.1	62213.4	NA	NA	NA	27342.6	NA	34306.2
P01034	42617.8	38186	79309.1	45988.6	62960.2	71834.6	60414	74380.3	60099.1	125783	47672.2	190574	50578.6	51273.9	39274.4	37948.8	82323.8	73405.6	78501.6	149054	59744.4	73813.2	48301.6	54739	25903.9	36199.4	46763.8	39049.2	52457.9	63940.5	59472.7	56622.4	56375.9	47374	55780.6	67305.6	73180.4	89957.4	149183	81255.3	117301	145077	173989	124034	125380	284509	173412	100057	154075
P01040	383455	444874	623710	633934	561233	807131	502681	470387	667736	549970	943664	722590	480133	723724	721450	604778	613738	529164	869934	676562	506666	636782	654886	948562	413107	576455	698299	651893	487207	443074	908879	697916	433739	510876	697668	718136	470656	404859	355554	369378	304496	323726	414319	381137	493899	600695	548213	501596	399746
P01111	250549	178141	250763	222728	216735	238636	223422	202256	275998	233655	299003	309169	189311	253997	222935	206603	228693	217004	246551	214655	211788	199416	204469	253668	171012	188839	205937	200254	176829	187013	216593	237999	198136	160381	208757	213380	181216	185208	251902	184212	202959	200530	213315	220249	195806	321533	284899	269390	181656
P01112	211301	131215	NA	NA	133849	NA	149569	132284	168853	85964.2	402766	NA	119499	134185	NA	140510	124642	149707	154455	164346	NA	NA	NA	NA	99558	79829.8	191279	191725	130337	104233	NA	207697	116597	NA	NA	NA	78360.8	154244	62452.6	23958	270001	79305.6	82520.1	33329.9	NA	258500	163729	273608	137075
P01116	80843.1	128838	NA	82226.4	55775.9	77645.4	NA	NA	79645.6	323142	100044	441110	90996.1	68215.6	91977	76209	68255.2	176940	107537	247859	204596	116333	174522	82071.8	48260.5	52514.6	74219.7	78116.9	46660.4	57994.1	75826.6	70775.5	50156.3	NA	79978.9	197521	120715	64424.6	96417	74238.2	80213.9	71165.6	93806.3	82862.3	84373.5	122940	111356	116378	69334
P01130	59008.8	64410	NA	79256.7	NA	75637	NA	91505.4	NA	44422.3	89482.6	NA	35755.7	46543.4	72853.5	38607	NA	53857.4	NA	NA	75540.6	NA	NA	46811.9	38886.9	49450.3	76763	70333.8	19901.7	NA	NA	43170.9	NA	NA	NA	NA	56745	39666.9	62393.8	41944.2	37845.4	27728.5	43788.1	32813.8	50620.7	80910.3	78414.3	70179.4	51270.1
P01137	71584	54189	99138.1	85204.5	73534.3	98778.4	77916.3	71370.9	73278.9	53682.1	85918.6	101183	24002.9	63672.2	51674.5	47956.4	58116.6	44621.9	76635.6	57791	33655.6	48788	46253.1	67798.3	60329.5	61712	72804.1	80118.6	56822.3	46593	65058.1	66192.8	62380.8	35883.2	63341.8	53352.6	79012.6	93337.7	115491	77093.7	93881	102905	107040	90559.6	88846.4	147325	119999	100014	77080.6
P01730	74041	64663.8	103135	71054.2	66611	96278.6	85825.7	95514	90957.6	63272.5	106854	86925.1	58734.8	75066.2	63165.2	59055.2	77362.7	22916.1	76318.8	74658.4	74031.5	56754.1	63023.4	78128	51381.1	61700.8	69689.3	71098.9	61633.7	64916	76186.3	79075.7	52879.4	54611.9	67763.3	85348.9	39881.9	48828.1	74541.1	50356.7	60845.4	67896	66470.4	72244	74969.3	125865	116836	114151	59821
P01889	393376	328300	338720	395536	357724	485730	184418	292287	458607	200287	519154	343447	270603	544936	389689	431618	693374	286629	579468	484115	397152	339940	128868	418329	256549	288641	257993	330210	287091	111334	352828	263226	323942	62569.2	326834	289823	179481	238688	249118	214882	282283	218737	283583	282483	332365	453182	413160	292949	230600
P01903	42522.7	57323.4	93085.1	74189.2	66435.4	85250	83099.9	73519.2	90885.5	76028.4	105980	81735.8	456090	1.22699e+06	1.06878e+06	1.00214e+06	1.0002e+06	900551	1507614	916182	585322	753245	638297	1.18407e+06	31570.1	57528.3	67183.8	65199	73570.2	74988.2	131382	128871	182839	191328	343807	304344	83654.1	106860	119541	100689	95887.3	118916	117064	118543	100896	429584	145599	123619	925716
P01911	40903.2	NA	NA	63198.5	40170	45360.5	NA	NA	26827.9	NA	41519.5	NA	146468	790699	565807	558245	648079	246668	786171	258074	261124	306331	193406	527113	19351.5	29897.3	53634.3	43657.9	50722.1	80571	81292.7	79329.6	127637	54915.7	227476	91130.2	67533.4	125131	124274	87220.4	82090.1	90319.5	83859.7	93335.9	83044.2	254660	118793	92418.3	698324
P02545	155935	96933.3	171898	142210	145908	163942	131053	125612	121599	94058.9	153399	166428	87130.8	140170	127192	111398	158129	134946	181594	154276	87182.8	115170	93573.5	106560	101186	120734	145059	139688	144246	133992	171455	169401	155652	121891	179401	162680	254359	246517	340664	196064	275785	298913	302470	229219	271334	430708	324197	204620	267652
P02655	216160	211037	NA	217952	336168	306216	259918	416254	220795	193047	243635	457526	165649	191616	175742	159224	319347	137726	289135	236720	211605	162756	NA	223040	179192	187153	210093	197843	269419	163285	227997	207137	197869	172671	173794	385180	484881	243605	219714	186133	324452	392776	402706	408727	245486	336090	272154	203551	224267
P02750	173603	148974	185123	218335	212440	268588	211752	205914	162713	117894	218167	187141	133553	249930	210064	222551	333323	227912	279891	229787	256228	230048	229618	266340	126162	169366	208132	211547	186367	119972	163259	162493	155948	113962	178080	177415	24055.3	NA	NA	33987.8	39767.9	41650.2	NA	NA	NA	180310	NA	NA	66558.7
P02751	NA	34041.2	51916.3	32242.1	45367.7	71547.5	78325.3	NA	NA	NA	93797.9	NA	NA	53878.7	33738	31690.2	48360.5	NA	44622.9	NA	NA	NA	43972.3	NA	33126.2	45273.6	42106.8	28090.3	34456.1	NA	56622.1	58234.8	31020	NA	34322	NA	80187.4	60359.1	89679.8	59088.6	42946.6	56182.5	54927.7	59330.6	54569.7	117113	134658	94720.9	61026.6
P02786	210107	172258	257105	256633	111498	189557	167804	166342	117624	113509	256212	80980.5	197319	275163	253220	259690	128429	123346	190526	171395	150648	156049	219877	207271	141648	187584	242278	249514	72919.9	78088.3	113378	89160.4	56377.2	48083.7	79934.5	73986.8	164171	245067	398457	297791	182829	218762	260311	229298	211623	310161	277184	204855	222233
P02792	69140.7	51201.3	85017.4	69915.8	109182	138465	116059	97411.4	82397.1	72651.9	97447	120496	66933.3	96177	93965.6	88139.3	162699	129122	161601	102965	108147	135475	90507.2	124899	51488.5	79841.3	88341.6	76489.9	103737	128165	145370	140540	168087	161473	215163	154892	158839	202749	264468	153172	269854	259446	291973	238413	207965	406792	222786	160845	231851
P02794	27929.8	20956.8	32810	27305.5	39479	52762.1	42446.4	36510.1	25812.2	31062.1	38602	57435.7	27479.3	46519	39880	37630.1	74012.4	58093.6	87508.2	56967.9	42396.6	42004.6	36278.4	54946.5	18984.2	26239.5	36159.1	26404.9	46610.4	48379.2	67489.7	60154.2	57553.3	54778.5	83711.5	55338.3	88844	96454.1	109676	63870.9	132156	136372	144939	98227.8	103211	199196	102229	66394.5	116183
P03886	181161	287105	134679	179725	153868	253408	158431	137651	259128	170165	219409	135604	135544	208508	254986	214275	195367	161609	205125	356944	136353	192914	264866	203126	106597	109942	168236	171109	149836	116301	207289	145932	170704	139548	187467	284156	112668	115850	210903	135266	142777	145810	151746	170354	164056	215139	243043	265257	171082
P03905	90313.6	38349.8	67681.7	86165.1	97761.2	100469	34537	67347.5	139748	61131.2	102901	46723.7	67041.6	107430	112004	88557.1	92737.6	40491.8	123499	94575.3	22182	26566.5	45995.8	120384	56015.5	51978.5	62962.1	93324	80331.7	26267.7	101719	103539	114576	27173.1	115225	93579.7	75736.3	56497.5	66139.8	59693	71665.9	62619.2	69823.8	64448	70903.2	117006	100184	93997	100430
P03915	96082.4	62629.6	85861.9	102084	99232.7	128242	98144.5	80923.7	126107	83684.2	135293	65084.9	97944.8	119353	114429	101568	94353.8	72761.9	148259	110240	100266	117117	105380	143772	64560.8	74317.7	73358.9	99704.9	86490.1	63576.7	129985	127393	114168	63958.6	103812	111701	68076.6	65990.8	85314.8	56951.4	64075.3	70875.1	64024.9	73546.8	75285.3	132042	105676	122154	85022.4
P04035	19808.7	23316.4	NA	24804.4	17786.2	38840.8	52199.5	35832	36124.6	23871.6	32581.9	NA	27061.4	36873.2	27211.1	27509.9	24393.2	37915.1	38476.5	38379.2	59817.7	48071.1	48295.5	35010.3	10706.6	18620.8	22149.8	22498.5	NA	NA	10056.9	NA	NA	NA	17988.1	NA	14253.4	26701.6	56401.9	9367.92	21181.7	33687.6	19041.8	21129.9	26049.9	46965.1	33558.9	30719.6	21943.9
P04040	404333	278690	414142	435363	385536	514836	419543	372229	435591	321290	698591	424738	244539	322979	318040	290000	342988	233302	420330	292158	270217	320270	313752	415386	274034	309778	415765	422820	367680	353634	543951	514037	471824	321175	685051	513101	247767	335250	561636	408241	295587	392814	489010	485957	396539	799356	683955	628938	482317
P04049	53232.8	49298.3	85958.1	53854.5	59484.6	66717.8	65329.8	73086	71227.1	60477.7	77629.9	95623.4	47415.4	71409.5	69203.6	64116.7	65300.3	51901.5	79523.1	76879.5	49196.9	65907.9	75310.2	93959.7	35348.9	47892.6	65968.4	50528.6	37360.7	45004	57055.4	55907.7	35159.1	31925.8	54653.9	57236.2	35683.8	42096.5	63767.4	43491	41564.3	43497.6	57878.7	51823.8	54048.8	68674.2	69590.5	62369.8	39973.7
P04062	94341.8	70789.1	151671	101065	83456.8	121115	91899.3	NA	98171	75801.4	118853	NA	64921.6	117891	105035	102896	103559	86370.8	135945	90297.7	80416.6	92415.5	NA	143373	64114.9	67579.2	89557.1	94358.4	72667.9	79444.4	101288	97130.8	73801.2	59821.7	90087.8	120069	72162.5	81691	126794	84493	98929.2	111788	102817	100252	125027	222816	160427	145458	126416
P04066	95514.1	98531.9	137717	133544	125911	171917	144713	148099	131006	135302	186380	164210	133718	261305	238087	215317	243145	215143	288891	209111	229084	197704	146641	276737	75285.7	88371.3	107722	119961	137648	94409.1	210259	210318	235725	134573	267677	264395	73412.8	95095.4	138261	87406.2	104735	98524.5	90354.6	108837	94143.8	198307	154084	128748	267411
P04075	696082	462652	598768	733527	549057	766400	539422	488768	592283	425656	781832	420302	394375	701613	698840	589567	584641	390044	736634	481994	377882	469772	412788	634971	531326	645222	752828	734015	513113	465550	736671	648993	380458	286711	542452	307620	415776	629248	765017	649614	488639	570673	621354	668906	578963	806599	791034	708285	382989
P04080	360352	279054	402280	375278	358610	411943	332727	302338	321371	263371	398998	392682	300777	473963	425159	364849	422349	321662	500445	353926	308092	361904	306659	426657	280499	330931	399027	373443	345387	313565	430038	412055	331916	238775	408705	396308	350073	425126	487472	378405	289782	432439	431382	423206	336244	580449	481767	408159	393023
P04083	246527	161617	200621	174620	308496	256196	199054	199595	167850	118315	174355	170488	30367	30490.9	20714.7	30535	87746.1	43495.2	47944.6	59520.6	36166.9	30513	20601.3	53530.9	171979	178057	177872	183966	272912	196155	245610	225014	273528	186321	247659	241609	106553	121903	165531	150705	128024	147083	181132	188147	130389	227302	201170	172521	97892.9
P04150	33680.5	24830.4	48851.6	36361.6	29215.3	42729.9	38120.6	26342.9	45270.8	38809.9	67736.4	65126.7	24359.4	29286.2	26439.7	23849.9	26006.6	22939.2	30224.4	24132.7	26108.2	30196.2	23618.6	37887	20682.4	30913.9	31768.9	30219.3	21808.9	22018.9	32700.9	30276.1	19425.2	14771.8	20115.3	17391.8	54298.4	56983.6	86416.8	50434.1	50959.9	57502.3	57213.2	54604.7	61102.8	80855.6	86122.4	80405.8	41388.4
P04179	141359	131680	176463	167123	151734	224023	164809	166230	203302	162058	300027	249442	138741	223198	211362	191612	211860	169685	261063	188317	159480	214387	177288	260492	106467	146880	163100	169307	141368	136514	197612	188504	200967	143436	217404	198270	55657.3	79359.2	122021	76502.8	86746.1	96494.3	88964	98563.5	108917	191747	155910	148164	116996
P04181	98849.8	80627.9	143896	123698	118255	206742	169051	181944	156116	120071	194031	143958	84094.7	116588	117009	107927	125137	117297	175729	190276	163942	160862	156630	183711	73291	94862.4	113960	112625	62469.3	73767.6	117882	96535.4	56428.7	64662.8	91210	108476	46133.7	69293.1	113242	81730.9	89959.9	95324.1	105379	126942	108229	160703	132097	155778	83006.6
P04183	81720.9	73630.9	71030.2	107985	77943.3	125020	80498	69200.2	60279.6	76832.7	131601	NA	69715.6	52156.8	82592.2	73872.8	62475.9	NA	74623	NA	70558.7	89034.5	78685.3	98646.6	63360.3	78017	88919.2	90180.2	44920.1	50430.1	67107.6	68861.2	48756.2	NA	55908.2	NA	62079.5	77778.3	113795	76662.1	64754.8	84717.4	91973.6	77310.9	122275	158898	149525	146130	43758.8
P04233	71013.8	75591.1	154576	89541.2	73944.9	111267	111471	158531	61245.1	77960.9	102281	67025.5	199985	373305	357825	302086	328272	480046	533359	506802	244269	326786	314678	319537	44065.7	62936.3	93383.7	88372.2	97033.1	111364	163893	162005	169594	219011	283428	334395	46749.5	54848.4	71650	53561.4	55364.8	57074.6	62563	68626.1	64142.6	155214	87474.3	60338.9	220492
P04264	57464.5	51310.2	88923.5	104073	58801.4	80782.4	105017	50057.3	50095.9	34298	33324	51502.2	52586.1	88646.8	63610	53053.9	56870	56338.8	64229.4	46988.6	79202.8	67124.6	30462	37287	42701.6	58439.3	69643	73726.5	64885.2	53051.1	60296.7	52121.1	51155.5	50056.1	31660.1	121279	163331	103913	83244.5	81426.7	70314.3	65438.9	70469.7	86316.7	34633.3	81657.9	55793.5	42004.9	77488.3
P04271	NA	NA	NA	NA	NA	NA	NA	NA	NA	NA	NA	NA	NA	18693.1	NA	15672	15560	13861.9	NA	NA	17360.5	22524	NA	NA	NA	NA	NA	NA	NA	NA	NA	NA	NA	NA	11241.6	NA	NA	8674.04	11395.5	5638.68	7195.58	9885.13	8007.33	10441.9	12464.9	28045.5	15700.6	11290.4	8167.38
P04406	1.01858e+06	853575	1.31413e+06	979268	845459	1.10008e+06	1.27518e+06	1.11854e+06	943453	842744	1.28987e+06	1.25474e+06	708904	971648	1.01287e+06	944070	880147	876997	1239672	1.04146e+06	847365	1.03934e+06	828591	1.16021e+06	705648	870387	1.09266e+06	975990	753035	917818	945519	921984	688627	546132	978961	769988	680702	858384	1.15176e+06	870899	784734	966917	1.04207e+06	973647	935955	1.29868e+06	1.1749e+06	1033709	669478
P04424	85573.4	70183.7	108631	109983	93318	119528	90012	106601	119941	96816.6	157621	237399	57463	113915	99226.1	95374.8	89215.1	70639.9	130841	75964.7	91284.3	80816.7	78833.9	125658	65825.2	88014.6	92482.5	103183	89286.7	92356.7	116221	91902.7	83317.5	52669.1	86289.5	59235.6	107009	85430.7	131327	82929.8	86758	90926.9	93717.4	100467	91822.9	160903	161902	164414	81650.7
P04439	85136.3	41639.4	29721.5	92692.7	100164	128222	43570.9	27075	125076	33730.7	124202	23419.2	70839.9	125541	113073	102834	114808	39772.9	143186	31327.3	64863	60443	56625.6	113747	72174.5	63070.9	76954.5	82927.9	105513	48367.5	98970.8	96671.8	92747.3	32157.2	103420	19055	79608.9	72312.4	100127	68224.9	78636.8	70524.2	88132.3	79150	89855.1	145880	126614	109211	78397.8
P04440	NA	NA	NA	NA	NA	NA	NA	NA	NA	NA	NA	NA	NA	64328.3	144259	85881.7	102819	62137.1	115132	175772	129414	97059.2	102004	93727	NA	NA	NA	NA	NA	NA	NA	NA	NA	NA	NA	NA	NA	NA	NA	NA	NA	NA	NA	NA	NA	72820.4	NA	NA	73457.7
P04632	116461	105834	192872	120220	108812	156724	137095	132121	123174	124597	186851	184934	109361	133994	124226	110128	127055	135819	144972	146105	127118	157710	105059	137171	81706.7	96743.6	118175	124505	98835	125056	142995	132201	102441	93216.6	142441	134116	131385	143996	209523	135077	141103	170182	183846	174680	165657	307584	247428	194374	134657
P04733	NA	NA	NA	NA	NA	NA	NA	NA	NA	NA	NA	NA	NA	4662.58	NA	NA	2647.43	NA	NA	NA	NA	NA	NA	NA	NA	4151.78	NA	NA	NA	NA	NA	NA	NA	NA	NA	NA	17729.5	29640.4	33127.6	21693.4	20439.2	21104.8	17739.3	20539.4	20753.8	12330.9	6007.68	NA	12203.6
P04792	429319	285252	532454	506281	372399	514405	359175	409856	453364	297562	543844	515126	233087	428251	372053	355401	337016	222900	417601	344444	258749	258678	252469	478286	305996	407013	492484	489996	330461	237631	487967	444496	246949	167620	326118	310274	95707.4	91481.4	108576	79311	103889	93521.3	92744	88171.4	112646	143547	147548	161995	54378.4
P04818	125106	113271	140922	170915	133343	237892	176915	168584	208442	129552	202943	85654.4	70530.9	71085.7	67276.6	86027.5	54398	54426.1	104020	86493.9	139370	143660	140923	166227	86076.9	125544	146193	168483	49839.8	56569	66636.7	59733.2	35414.9	35443.2	53025.1	68086.6	58293.6	91136.2	171480	115801	103220	112484	136811	140863	229348	256841	324844	320145	61447.7
P04839	116070	NA	NA	95774	85425.1	117439	107719	NA	NA	NA	NA	NA	NA	NA	NA	NA	NA	NA	NA	NA	NA	NA	NA	NA	NA	NA	138314	93655.6	70215.2	64445.3	114546	100334	149606	96745.9	160824	152310	58262.8	25945.3	115998	80753.5	77199.9	31000.2	114130	89853	NA	128266	193159	74677.1	NA
P04843	350555	238908	331959	355471	330776	430214	334379	305102	391271	268829	491519	339188	243753	372228	332889	307788	330808	251307	412892	291778	282445	323307	281702	422715	250658	303444	345363	354275	297724	245851	396237	373830	331130	194293	366898	283260	241434	298487	412869	283514	312986	323500	333245	333800	349902	575483	507810	450997	331332
P04844	307932	248942	344093	327083	301773	387822	310046	274051	349865	291967	429311	339377	234581	341990	296637	272522	293305	248879	351360	298668	280042	311768	286716	378973	226685	274409	320000	333330	250505	246356	332089	306091	263302	189638	333833	271498	215159	246157	380575	241862	254591	275637	300507	287316	303293	464108	426092	384847	276253
P04899	216275	164284	206462	200522	206451	237727	180694	177636	203852	155251	262876	219568	184772	292504	246991	227643	276882	204549	292844	235148	192010	222867	212110	235685	162423	188814	207202	201402	211742	187637	250584	251256	243602	184739	267654	237471	276270	289751	387213	264329	289541	311169	330407	318535	272776	484118	397014	342549	290294
P04920	32042.8	NA	NA	34871.6	28265.6	50457.8	28904.9	70317.6	45462.9	33677.6	44412.5	NA	NA	42721.4	32787.2	36832.1	41030.2	36897.5	50015.9	NA	NA	40037	35268.8	41234	21329.8	24615.5	37496	38397.4	26977.7	22263.9	42574.4	42318.3	27131.6	NA	41824.1	NA	43538.8	68158.8	90762.1	59697	53132.7	66315.8	66283.5	73232.8	69004.3	111359	106409	97592.7	46300.9
P05023	132855	114041	163404	155888	136656	205128	152376	179437	195627	139444	227989	185562	110634	153648	131959	131401	143782	119602	172251	162123	136830	144620	140482	174599	94932.4	135858	145122	152000	109671	114176	155577	158579	113159	97553.4	139063	144820	124068	137467	187376	142249	144747	152578	173257	170484	182369	250494	248358	237517	112572
P05091	101818	88846.1	170791	108431	120484	148361	197370	276402	128172	157797	182066	186342	197063	248908	209061	205170	246076	230669	250795	271162	244201	235926	259107	260124	72733.6	88780.6	89120.8	95564.2	122072	174714	160261	165504	163618	168219	219118	254551	65942.4	71050.2	129698	69235.9	94332.8	103024	100681	92999.2	114724	178425	132970	102983	143643
P05107	270988	193819	284541	227475	223782	258627	211691	221859	245808	203643	293364	298467	170086	264993	211037	191873	254280	205972	279377	241212	201381	209123	195666	241829	185978	233793	241101	221556	193963	167130	223364	216791	218835	141677	207340	194707	189365	193770	197624	153794	184313	188167	164658	169331	146617	199044	183826	169267	96185.7
P05109	87363.3	91269.2	120557	93803.9	96447.5	143467	137237	120775	64941.3	62961.7	107794	94906	111467	158749	83160.6	62472	167658	130290	143693	96280.9	149756	115300	52171.3	65213.9	58611.5	90682.4	121453	92077.9	127220	187709	275368	318032	327655	334730	689745	556727	66258.7	70511	104730	58077.4	54040.8	60684.9	83308.6	66428.4	126718	233115	148040	58516.6	184605
P05114	30888.3	14153.5	34524.5	34269.6	30586.3	47651.2	30545.4	30582.7	48419.8	22646.2	75269.1	69276.9	28950	61393.3	47185.5	43429.3	45985	35253.1	49088.8	30781.5	29925.5	51883.2	32321.8	60691.4	18809.9	31360.2	48945.5	36987.4	28236.6	27422.5	40397.8	34262.7	23565.3	20731	36215	22269.1	51020	30753.9	41826.2	37992.8	31283.4	26433.7	50505	30059.8	82895.5	65883.8	79117.6	61179.7	49431.7
P05141	484475	406322	591654	516941	473251	622543	576705	565822	609110	527563	759574	714730	446864	696079	589603	557906	617225	568611	716155	666399	540316	667085	678394	676844	335560	431116	510681	516792	429691	426123	553313	594608	499637	398018	569554	583444	432515	462736	622581	448245	483121	473554	551462	549318	552955	737109	776791	681650	486095
P05161	119188	95735.6	163024	92500.9	88319.3	117450	134213	102287	91263.4	97547.4	127659	141366	87525.5	103071	107096	104931	83370.6	82750.7	132467	140103	107728	106954	99138.3	118012	85927.2	57341.5	75156.8	94372.7	85799.3	68866.7	108149	99101.1	92875.7	68589.2	106188	117257	177773	91551.9	131385	72573.6	124087	111572	107006	102680	95500.6	172639	140812	123305	120855
P05164	176537	117848	129360	143874	160270	207132	131476	138973	181320	109835	220685	179219	NA	85553.3	75875.9	55448.2	90783.3	NA	96413.9	40415.1	78327.8	81595.6	NA	80961.5	114329	148351	142818	128309	144790	114570	165003	152581	151780	104590	149052	137412	29944.5	35268.5	72945.8	42229.8	49532.3	64005.2	52360.2	71030.4	67096.5	102849	69306.1	102268	32736
P05165	68147.1	66433.6	99312	76630.8	71446.3	92657.4	89354.2	87598.4	83026.6	75129.9	121370	128274	71508.3	116965	105654	95853.4	106033	91750.7	126027	121500	94311.1	108752	95168.4	115054	53257.3	65905.3	82851.6	78757.3	73055	79728.3	99853	91746.8	96233.3	80823.1	114601	119341	51813.9	62068.4	83991.6	55485.7	59939.9	61505.7	70109.4	69422.5	70210.2	118796	98131	85052.2	92744.9
P05166	105109	90844.3	125087	110324	108415	145068	110938	129447	135235	114296	172110	175156	124645	164127	147416	133333	157225	150481	185859	158785	149385	165728	149577	161442	78394.9	93692.8	109394	107719	102709	106686	133306	128708	145781	109209	159561	165504	68250.3	83188.2	117776	70407.8	89284.2	95262.8	89895.1	99225.6	91761.9	171031	127613	116783	131233
P05198	171795	131386	199541	192003	154236	224500	168936	163742	241337	162328	285899	235022	122414	203692	180382	174362	174294	132870	201290	182307	154692	172770	172383	221717	122073	156182	186655	190119	125578	124480	179321	174993	118123	106931	159993	163378	107697	121740	187093	133302	124668	135770	152055	154414	170231	239494	228766	236836	119667
P05362	61384.4	57768.7	87825.3	58221.1	49323.6	44410.6	61305.7	15111.5	51796.5	58007.9	72582.5	92611.2	57085.5	101386	97147.4	81312.4	84300.5	63026	104422	82039.5	57088.7	80007.6	70630.5	79151.3	45005.9	51377.5	69510.5	49170.9	44079.4	26417.9	42297.9	46863.7	41138.5	23437.5	41869	51807.2	45649.2	53292.7	37536.6	31649.1	34986.9	35513.4	25228.5	36443.1	NA	95250.7	34396.2	31357.7	29347.9
P05386	422874	206986	391219	576105	514230	586233	309071	170626	373241	218886	457104	178798	156162	593164	482296	473787	552662	205856	573190	252997	197512	263066	159072	336499	334317	348468	551480	396632	379510	278814	501957	447132	341198	164905	446949	128309	316243	278858	433225	389337	329577	332568	359477	479279	338060	413762	476898	439331	314788
P05387	887575	879478	1.23592e+06	1.21329e+06	959571	1.41651e+06	1.32309e+06	1.22279e+06	1.43208e+06	1.05394e+06	1.70081e+06	1.45958e+06	891628	1.24911e+06	1.19703e+06	1.17644e+06	1079629	994542	1.44897e+06	1.20871e+06	1.30665e+06	1.20203e+06	1.18586e+06	1.46527e+06	748212	1.00797e+06	1.18786e+06	1.25834e+06	736195	738292	1.2401e+06	1.08771e+06	694353	584551	1.10142e+06	987514	566872	783198	1.13606e+06	891367	725679	846600	986509	1.043e+06	1.10005e+06	1.44227e+06	1.54224e+06	1571853	808855
P05388	462300	340606	514992	515487	431051	641773	508791	486953	610978	453563	708702	551984	384713	555289	505397	479445	459561	396650	592677	467905	438251	465349	462431	569704	335674	415665	504316	510779	340818	327808	513325	480782	318332	256570	473815	354085	239659	318665	471202	368194	342154	357052	412076	440733	441532	623902	626589	607547	350065
P05423	51877.6	39174.9	71514.6	57608.9	38617.7	70379.7	65775.1	61572.3	67916.4	55870.9	90352.2	76686.4	38252.9	58347.2	61761.7	57746.4	51265.5	43344.3	72106.5	58185.6	47550.7	54627.9	54893.2	81143.9	30821.1	45279	62569.6	57409.1	29030.9	30355	48703.1	47170	28060.4	21282.3	39542.7	42156	31727.1	33681	58890.4	44431.1	36026.2	37526.1	52062.1	52341.3	45522.5	75016.4	68995.8	70849	34554.5
P05455	130153	92777.2	125413	136060	111138	175137	121352	119003	168585	108915	213206	148380	94680.2	141012	123166	116275	127882	83637.5	142644	118666	101855	113601	96989.8	144119	93494.5	116797	127574	131158	101304	92538	131963	125058	93672.7	65246	118319	83697.2	82334.5	107973	149616	109368	108202	118207	126104	130351	140165	191824	190902	190985	102725
P05556	98613.1	88305.8	124795	98668.8	91054.6	124794	102930	115764	114225	93471.8	142412	138580	70859	71361.6	58740.5	57794.6	70775.9	60361.6	80179.9	78811.3	81972.5	66414.8	79390.3	85054.8	69315.2	84092.8	94486.1	96006.9	74877.1	78543.1	97895.3	92180.5	74078.4	65066.1	82196.6	96241.2	71238.4	80566.3	108669	74301.6	78141.1	90162.2	90639.6	85600.9	97989.5	148127	134892	121405	94154.4
P05771	127248	83319.8	83802.5	145968	119412	157409	98988.8	79217.3	140216	85432	183921	159809	80549.1	185523	154169	153655	161491	106085	170879	121937	83257.6	96730.5	93389.6	176269	87625.8	120756	122811	140333	103521	82524.2	148513	143931	126579	82801.7	137249	104569	77416.4	102302	136855	98382.1	99587.1	96675.4	118978	122770	105701	192484	180451	172416	89259.3
P06132	112207	104106	144086	109676	111421	127804	123998	115689	120671	118365	147461	136086	106034	127965	111587	111712	128755	101851	134478	118878	102295	102928	117820	153817	79455.3	107677	109822	106576	99936.2	102044	121890	124130	91754.1	78704	124156	121520	103128	131859	193167	126602	139462	148852	165590	158862	150097	230808	189572	176613	141439
P06213	53626	41437.2	64416.9	62028	45448	71030.4	40238.3	58917.1	68408.6	46827.7	96128.8	71161.6	32145.7	56621.9	50306.8	50580	50684.9	NA	57017.4	39396.1	37345	36035.7	31190.5	59932.7	38123.8	42515.5	41809.8	60769.2	40826.4	35698.7	60546.5	60950	48736.9	27928.4	56599.7	58058.6	36098.1	45625.9	65222.4	45663	42863.9	48185.5	48086.2	52775.8	51465.9	97793.3	60480.2	59985.8	39773.5
P06280	185290	177716	247371	210855	182997	249852	209381	224427	224887	169015	259735	257216	126526	314642	245963	230952	251291	134597	310376	233226	142615	158078	213132	294316	137555	156364	186113	198793	157029	148856	245299	213159	154045	159068	211956	178040	119421	139547	202750	143237	172556	167141	176758	177097	180365	281494	250542	216204	155898
P06396	188293	116029	157108	181651	188343	218438	143223	141660	145660	112794	212260	134896	137089	261383	227661	208809	239501	188435	303252	194318	134112	165157	141193	208211	132418	158856	193554	181161	197977	160041	258226	259760	228495	142392	271847	171780	358329	390041	485473	262879	417106	464340	478254	309069	385680	600786	432068	213161	217954
P06400	120807	108694	145324	126671	102944	162685	150884	145860	171891	140939	187504	187526	95665.5	104055	78028.4	86269.1	79627.1	73224.2	100768	110380	116890	126411	103451	121670	82634.4	96628	111338	124191	73320.4	80343.2	98891.3	95160.4	62646.9	53034.8	70277.5	67851.3	79605.9	88105.4	117934	84251.4	74996.1	78864.6	95481.7	97215.6	121529	149913	154264	147727	56311.7
P06454	207996	56819.2	7155.73	185923	165194	215611	32181.4	15548.9	209110	37063.6	207853	11902.9	61914.4	193117	184192	160263	144167	22338.5	193210	7339.55	27717.4	27261	37505.3	187683	135588	174306	214182	181693	135557	41106.4	186270	165364	67664.5	31730.8	97826.6	7976.34	98388.8	219414	83243	196919	210168	59365.9	223748	114876	300891	245555	278473	69893.9	198716
P06493	150088	137826	202837	200039	162729	257324	205888	224427	254512	172677	257337	197478	111259	145839	124329	146389	120022	89119.3	166195	166653	165883	172541	175484	229135	110135	144826	169085	200715	104503	121650	160552	147555	58070.5	65547.5	91348.4	104640	98511.7	150166	245195	179074	154020	150859	188322	187412	244302	287734	343917	323777	99755.2
P06576	593206	467889	752008	640492	587284	775757	708643	719754	733865	634079	937669	825101	559330	796325	729550	694066	736106	664215	895426	781217	675887	825845	711760	902639	424558	529187	663271	633134	549711	570546	715374	714706	699007	515295	836194	818484	439823	497557	707968	482358	546664	545521	566501	601694	594160	926508	816581	801488	571334
P06702	80917.9	62856.4	113756	90415.3	98900.9	141730	131074	112260	65153.9	57457.7	122622	93521.9	90729.7	142927	76771.7	57542.4	157252	123765	149475	91258	133475	94995.7	50711.8	66681.8	54131.5	78510.5	105102	95605.8	116724	161956	277922	306641	346418	357988	773036	725302	46077.7	60107.9	100273	46359.6	47304	56334.6	68706.2	56969.6	111505	218193	145846	59022.9	164611
P06703	256638	115697	228198	287498	271808	341698	102145	310718	186068	81251.5	267245	195758	127222	299517	305049	285022	328824	157517	370061	160103	63797.8	99727.4	187384	231618	190665	233363	303218	259194	248744	171889	362294	343131	400175	185342	475092	217543	314670	299798	222772	237738	283721	258892	299138	213560	269404	445885	314988	100505	259183
P06730	234850	155448	229024	268291	213349	293032	211224	179047	291974	197789	377131	241400	178944	306160	260933	255969	262547	195398	315962	189522	172367	239674	215270	297215	165361	224420	250744	268272	174932	173165	254799	248363	152863	103215	211006	159098	185692	198364	298101	222290	194843	211753	245165	227593	251202	354195	353899	319888	191614
P06733	1958216	1.35271e+06	2.23287e+06	1.9938e+06	1.63639e+06	2.15243e+06	1.93993e+06	1.73012e+06	1.80799e+06	1.47174e+06	2.5146e+06	1.90117e+06	1.51732e+06	2.28443e+06	2.3001e+06	2.08656e+06	2.01723e+06	1.57111e+06	2.57064e+06	1.72897e+06	1.72979e+06	1.93105e+06	1.59514e+06	2.49916e+06	1.39372e+06	1.67963e+06	2140910	1.93539e+06	1.52681e+06	1.42139e+06	1.91178e+06	1.88352e+06	1.34886e+06	954060	1.92959e+06	1.17097e+06	770761	1.07848e+06	1.42596e+06	1.1474e+06	871721	1.11215e+06	1.17798e+06	1.30175e+06	1.06375e+06	1.59898e+06	1.5649e+06	1451242	1.04303e+06
P06737	226634	185493	306273	234603	187124	264288	230838	234681	249566	214528	336419	328339	167572	251663	256814	237099	217007	198471	288181	262675	217820	253006	226236	295894	157654	195874	255440	234887	168150	192435	258273	240241	163221	164088	248289	253611	148184	179271	257080	170093	178859	194505	212538	205335	215234	319351	286396	253202	158792
P06744	389475	264053	381877	406342	319214	453392	334790	336832	379658	303722	492240	385747	240325	372496	387703	344677	326881	266746	438774	300440	263138	339265	276896	425706	275323	340856	403555	411559	283297	283115	385131	383885	239506	192970	342680	274980	249231	328137	428238	337186	238696	313982	336209	343369	327234	481981	440854	417652	254414
P06746	78541.9	64741.1	52780.2	86192.4	80425.7	95122.3	67913.6	41725.6	94903.1	55960	129775	62627.6	75934	155745	136193	131388	132972	85196.2	145726	101879	91727.5	83737.6	95493.7	149749	57226.9	72915.1	76570.8	78226.4	82359.7	59372.5	98119.2	101632	94304.8	64306.5	115734	98368.5	29182.2	37653.5	61335.9	35447.1	44065.8	43752.2	44496.4	47016	50352.1	85215.8	77394	76872.2	68887.3
P06748	469599	226021	373955	453628	410571	533855	329242	303971	507251	274309	582968	330155	233532	423057	491512	415772	459026	197118	523111	311098	252397	339625	274300	512550	379508	379160	522245	447699	450352	330323	425546	434706	346310	253110	524316	221053	169064	279390	352558	315159	236147	311011	324003	329297	326873	407675	425517	362540	288296
P06753	173837	174764	272333	219288	153595	284708	251697	242036	247360	231555	452848	365803	178232	240172	227728	209901	203941	248544	245721	250110	221263	317653	242924	297114	117362	161758	230724	236911	115431	201386	206225	202996	104571	142064	204064	182761	119269	145065	343003	182534	159645	193216	234099	200097	269528	390970	428342	423093	152955
P06865	227337	148532	310763	245754	212478	292696	154634	156468	263180	168504	315732	346337	152306	277215	239186	232018	240429	133150	315701	279317	124277	166136	228954	280520	162070	175439	220801	237092	206810	121798	297998	268020	298274	156744	309074	284976	135713	159886	233619	134441	151156	167755	154193	146302	162258	322533	255213	209914	199519
P07099	105426	77554.5	115308	93563.9	104193	124092	112492	111073	97252.2	83727	139282	115514	83603	108569	105950	103249	107979	92118.6	142613	122311	91539	96943.1	112669	115478	72295.5	78562.9	89412.9	98740.3	94133.8	80997.5	116983	114802	103952	84434.5	129568	134747	80331	88537	111504	70501.5	98163.8	108817	108814	95050.5	92072.7	174157	121233	88527.9	81077.7
P07108	632274	366160	831365	710249	642451	872765	449325	223225	629355	349514	934107	702330	412285	1.49514e+06	1.27197e+06	1.11871e+06	1.23816e+06	619594	1.53628e+06	645109	398053	561148	673693	1.19978e+06	472876	655431	774782	693275	609590	511710	802665	781416	570865	340452	765441	252925	504882	593010	692083	508677	462445	589147	592862	528384	537377	820413	707730	531576	727301
P07195	434710	308636	526678	475451	374128	557388	456428	458733	563122	400519	676196	572970	323183	452942	439527	404170	393866	303465	529585	419805	355372	408444	399303	560098	298954	373642	451373	467947	293672	307443	468604	436951	248150	193618	381247	303097	212872	276083	414718	281968	241487	284496	328994	327456	341385	531774	510710	495829	253383
P07199	77166.4	93267.8	173514	81634	74329.2	95819.7	163991	132766	108658	134274	129321	185903	89377.5	93566.3	82310.1	89165.5	85894.5	135883	117349	184209	111403	132845	143446	112151	53794.6	62426.4	94081.9	87597	61471.1	100237	83697.7	78898.2	71424.7	90331.7	89672.8	188040	61653.9	56906.6	90381.7	63699.4	59161.5	63818.3	72105.1	67809	69423.7	88358.8	98144.7	98523.2	65843.8
P07203	93760.3	129055	100902	96367.1	140189	156051	155792	97550	240585	185341	195969	269599	96404.7	127313	105511	113622	160212	131566	157261	128075	207598	150342	159866	168827	68746.3	93060.4	98995.5	94579.2	119160	104015	136949	146972	161797	113699	166025	181085	812339	835554	996277	731015	775204	830064	819525	871314	657993	1.11386e+06	934511	721196	1.02062e+06
P07204	40180.3	NA	NA	32327.7	30466.9	NA	NA	NA	NA	NA	NA	NA	NA	45912.1	NA	31021.8	40481.6	NA	NA	NA	NA	NA	NA	NA	NA	30638	32388.1	NA	NA	NA	31531	NA	19579.8	NA	NA	NA	16706	30549.6	33039.3	16905.3	38938.5	37261.5	39992.3	32828.9	21106.7	81500	27126.8	20972.7	15185.8
P07237	741927	477417	758447	750154	663108	943318	675049	635438	837172	553447	1.00024e+06	717250	501738	828639	768176	685952	776273	550567	932124	622384	633460	711101	644303	921385	506212	624631	808854	730125	568366	525237	787675	733126	620400	403653	768878	568368	423108	556135	792205	547507	549633	607091	648899	620848	713043	1.14013e+06	926127	819137	686543
P07305	7277.32	NA	NA	6374.29	7997.83	11019.7	NA	NA	NA	NA	4107.29	NA	NA	10713.3	12654.7	NA	9623.77	NA	10044.8	NA	NA	NA	NA	NA	5955.39	7354.73	10159.8	9460.12	11030.2	NA	15812.3	12193.4	16600.2	NA	18945	NA	97535.8	40043.1	1784.52	23299.6	31922.3	7799.26	23044.9	6783.44	25691.8	25492.1	21293.5	59534.7	35845.6
P07311	183835	117739	141286	162271	147073	202102	156866	145439	204593	137891	255323	189102	134727	181478	145955	145752	146550	129391	157574	132493	137081	143779	136188	196854	117159	147318	155485	155166	125350	141725	147202	154731	111119	89763.1	131855	111304	131682	140845	204780	135994	120448	146605	149936	166486	161787	222558	219175	225330	105288
P07332	94002.4	70514.9	112348	102380	84712.9	111162	100320	99640	91945.7	96887.4	133243	100642	90295.8	143348	124083	123009	138372	102594	162951	147590	92701.8	130747	116559	144725	65763.3	80748	96683.3	102974	88566	82542.4	113643	115332	108470	84360.2	129745	123237	90719.6	101646	146554	88983.3	102930	118843	120946	117156	103943	200144	154961	128614	132836
P07339	154502	153555	209110	166937	229805	220283	210680	189169	143976	161978	209754	268294	150496	192521	168849	164195	181638	182475	233607	238991	162745	196072	198179	222087	125401	133567	160052	150501	186423	155651	223742	200576	120417	120499	200867	224092	163442	195669	261811	157066	220145	246677	236566	217005	227663	407672	262908	199725	266509
P07355	621631	472859	785927	734947	616487	800686	744257	736580	565542	545979	825640	773944	746967	1.0774e+06	1051008	988261	1.00397e+06	963280	1.21271e+06	1.04551e+06	765736	1.00439e+06	818735	1.02466e+06	454973	511849	717122	728790	612012	654606	898759	896979	680148	642103	1.02718e+06	1.0009e+06	551730	638248	938349	627713	625429	760639	833698	713970	760645	1.27982e+06	1.08259e+06	719689	851424
P07384	198793	153150	219944	184181	178034	215969	199569	200454	183089	156612	235820	251241	156739	225842	210445	189797	202840	182071	247858	214997	169043	194710	181534	226127	138617	157571	189690	187658	181549	168700	232689	227099	189165	155300	233999	249432	171914	200526	268421	178237	197366	217056	229222	219239	197722	335099	285363	231638	216544
P07437	1300343	1.03282e+06	1.50529e+06	1.65957e+06	1.28682e+06	2.06235e+06	1.4034e+06	1.40731e+06	1882833	1.23261e+06	2.33355e+06	1.4298e+06	1.04844e+06	1.69571e+06	1.62019e+06	1.58121e+06	1.58708e+06	1.13981e+06	1.87719e+06	1.32366e+06	1.35102e+06	1.53169e+06	1.40704e+06	2198201	957607	1.43856e+06	1.57578e+06	1.71595e+06	1.08579e+06	1.10719e+06	1.52422e+06	1.53462e+06	1.09471e+06	789094	1.38967e+06	1.15255e+06	805726	827276	1.24446e+06	935457	862376	990989	1.0533e+06	1.12935e+06	1.26701e+06	1853632	1.95803e+06	1701554	903325
P07602	156332	118498	167225	122048	181929	168543	151684	151123	138373	118769	212623	164821	158854	209686	165140	144765	233796	167810	246350	180190	187737	168537	186007	192765	109602	107119	125962	119993	176384	119773	191510	180031	185000	105604	194568	205118	109609	94535.6	96720.1	78745.3	103893	92559.2	106013	109413	72267.2	177135	108820	94021.5	155226
P07686	135978	111215	183189	152024	157489	184219	153053	169302	148212	133980	200613	193930	155354	229570	194432	186872	211366	184435	245305	237572	160746	188919	191304	223801	103520	106554	134421	143011	147871	134792	199434	186441	219529	147466	228038	238657	86781.9	92144.6	122379	86159.1	90476.2	99857.3	104138	94275.9	102811	192196	146580	104770	127021
P07711	NA	65597.8	100115	86427.9	77902.8	80432.3	102279	NA	118650	65881	102426	123832	NA	49501	96810	99849.8	83671.2	NA	105674	108941	NA	87464	94808.2	148803	50841.4	69975.4	108520	100995	58919.7	42905.7	83200	90780.1	73768.7	52658.1	98833	101287	33499.7	23034.3	81791.6	48432	53657.6	NA	46169.8	NA	69392.8	108246	NA	136415	56558.1
P07737	1.37779e+06	756430	1.24103e+06	1.24899e+06	1.03715e+06	1.32986e+06	1.05841e+06	1.00656e+06	1.19745e+06	847200	1527709	1.35584e+06	797429	1.36742e+06	1.27787e+06	1.1216e+06	1.10029e+06	738618	1.36705e+06	932826	776075	1.05706e+06	882382	1.28125e+06	883575	1.02402e+06	1.31752e+06	1.22445e+06	950585	842706	1.36247e+06	1.24777e+06	889806	623963	1.23825e+06	887467	1.04686e+06	1.15571e+06	1.34986e+06	1106270	1.09029e+06	1.1795e+06	1.22508e+06	1.38432e+06	1.19795e+06	1.47818e+06	1.59513e+06	1.38457e+06	1.13972e+06
P07741	208066	172138	254126	235233	197516	276043	205569	220541	258823	210905	330814	311597	178705	277438	264979	235920	230684	204466	304978	258684	219943	244256	221019	314669	162586	197936	248895	229165	170428	162140	253398	240134	182701	150097	238327	221741	220285	251685	336762	248445	255846	256169	280929	279662	294363	457892	406909	397150	321112
P07814	168174	136265	198507	180027	154664	230604	156123	180965	252977	161526	286925	241706	140120	206808	184194	172003	178965	136693	209080	185375	159079	156016	159014	234224	118670	153237	177401	181722	126588	117153	180759	172996	119179	94111.1	158531	146815	118841	124758	191568	131491	124226	137078	156362	157179	161889	247059	236505	254387	128523
P07858	106787	104066	110398	120843	137566	149440	106444	93760.9	110892	95065.8	147909	126669	89262.2	139570	106947	105370	149226	111099	129896	126513	91694.9	106525	79758.1	114222	84579.3	94819.9	115562	106197	121930	113500	150737	123532	140058	100648	130732	94094.9	64572.8	73469.6	107911	65202.3	70444.1	86736.1	87170.9	100487	85024.9	133793	103529	103424	85368.8
P07900	503073	362409	577809	546740	456285	672578	503664	498472	600259	418359	704670	516159	345320	547499	511824	490916	477675	365342	614870	476678	418242	473180	391372	630030	372330	463841	530259	539322	377973	356406	505683	491460	304351	238973	418919	348090	382219	520635	722703	510376	539035	542883	626413	570248	681399	945849	912418	799540	450545
P07902	45278.2	NA	NA	36851.4	46469.9	64821.4	NA	NA	62105.1	NA	64155.1	NA	58155.1	57445.8	46418.4	41413.7	60040.3	NA	54071.3	NA	NA	51186.1	63171.9	60074.3	28675.8	43943.7	57293.9	30814.1	32425.6	40213.8	44239.3	48357.8	43512	NA	49465.8	NA	57171.3	60012	76142.2	38254.4	34468	58119.8	127202	55871	57403.4	98479.3	91666.9	86748.1	76137.1
P07910	289362	207574	357144	292776	249679	362033	284296	300522	340859	255968	448260	374714	230242	338423	308827	286274	271543	237758	365415	288961	240926	301630	265993	374674	204374	232927	297769	290911	235341	216675	320229	311442	225854	171741	291539	253313	212895	253013	348047	255795	235133	258406	292750	289317	312801	421908	434699	407974	258607
P07919	235725	181014	214215	221502	251179	267860	170947	155970	211558	128119	211915	180750	187602	314248	257912	202661	306562	174082	291067	170246	161536	189685	132060	173572	170428	193794	228330	192129	235095	161575	240900	233903	246982	132396	263270	144740	177196	257486	381176	231608	256858	288967	288662	278314	203969	377362	276459	222866	232895
P07947	35779.3	33444.5	92731	38590.8	29938.6	47194.6	51540.8	NA	41909.3	77593.1	49647.7	178149	65792	39028.7	28149	29631.8	35376.4	34337	36576.9	NA	32034	36956	NA	35683.1	24948.5	36000.5	31596	35085.5	21428.9	33950.8	32545.7	33058.2	20929.5	NA	21795.7	NA	40643.2	38216.1	47875	35613.8	39908.9	44533.8	40965.9	43688.6	37425.2	62745.2	55814.7	52784.6	27843
P07948	219488	147868	232867	224938	218444	271853	196015	192121	270705	179371	298170	277041	185546	336483	253590	261820	309867	241347	322436	298923	225609	229873	247454	302996	159922	194152	223199	229443	200887	161939	244002	245134	219395	146973	237282	235908	79078.8	92561.5	127269	82548.4	107194	106924	101101	114191	105549	148330	133591	140191	99894.7
P07954	204821	155855	226575	229762	189133	266393	215172	207711	264444	192943	325203	272993	186723	306028	263325	249048	251640	205591	305254	241218	227084	249639	230914	297180	147074	197582	222850	215343	181420	176458	250798	239695	212833	163228	248094	215595	151430	183830	256313	171965	194650	190794	204194	214299	232319	310860	299661	304808	193670
P07992	14613.7	11324.3	17650.2	22981.1	16458.4	21520.4	24190.1	19830.8	23513.6	20755.1	36949.5	22011.7	11859.6	20093.4	26633.1	23122.1	15190.9	14405.8	32966.6	21096.9	18763.1	19489.1	20450.4	37205.7	7582.75	12095	18973.1	22338.7	15909.9	9500.44	22992.2	19208.6	10244.7	8442.26	18614.4	14768.9	25245.1	23089.2	37207	30396.7	27861.1	32903.9	37380.6	33737.1	30734.5	59203.8	53362.4	43180.4	42866.6
P08047	54307.2	15653.6	23017.9	51426.9	32446.8	66266.9	31390.8	21568.3	34478.2	10608.4	75193.6	18722.8	18071.4	67549	54784.5	43973.7	48408.9	20195.5	52472.8	20158.5	17696.2	31009.8	18796.9	61379.1	27975.7	49423.2	46443.7	42263.8	27875.2	11499	41592	47455.4	36661.1	7180.46	38914.7	13955.7	22374.6	37885.7	62270.5	39054.1	33573.5	41221.4	49512.5	49225.3	36982.3	82832.7	63573.8	64884.6	36971.7
P08133	94171.8	84758.1	131852	111655	81683.4	123696	116354	122743	98341.1	98411.2	157989	151460	107906	165725	161192	155696	134035	135837	210143	204352	135469	171832	170026	226560	61140.8	82721.8	107519	109237	76309.4	90707.3	128586	127293	77661	74839.5	137381	141462	271895	352855	501641	362841	310202	375479	407655	421193	394434	739093	607091	544632	437473
P08195	157130	137635	201344	180030	155924	247986	206390	219046	440259	313711	409393	410088	143258	198290	189042	189749	165053	168203	264170	233932	225354	238275	201753	316140	114162	154592	180994	178062	103081	106180	141416	134317	93047.5	70868.2	117284	104626	236641	205789	284166	203759	234720	237307	259896	261222	284566	359746	395725	420824	114728
P08236	138392	141324	178833	150847	152736	186634	173232	152440	177924	152312	217783	281576	144374	191371	146000	151550	182793	156274	185108	218796	175662	175950	180328	198512	108154	133686	145947	145406	129178	126309	157724	162275	178294	131601	178520	202491	97667.4	123691	161967	110706	112179	110342	123635	158348	119863	186140	193820	205078	141095
P08238	1.22728e+06	970164	1.40134e+06	1.37705e+06	1.07704e+06	1.68389e+06	1.30448e+06	1.26665e+06	1.58043e+06	1.16917e+06	1.88777e+06	1.40318e+06	880051	1304538	1.23085e+06	1.13709e+06	1.09704e+06	876634	1.43239e+06	1.10829e+06	1.09115e+06	1.2048e+06	1.12251e+06	1.60861e+06	861248	1.12368e+06	1.39787e+06	1.36468e+06	791112	877961	1.12301e+06	1.07013e+06	609578	537426	891589	712466	579323	746652	1.11928e+06	771468	768833	839066	951749	898759	1.02915e+06	1.41754e+06	1.41347e+06	1331044	629032
P08240	94664.7	80656.5	99288.2	102260	85005.4	114515	99449.1	83772.8	100599	82242.9	125488	97516	81817.9	117737	101054	95714.2	98724.2	83711.2	119449	87362.9	92410.6	97945.8	93439	112043	65066	84580	97907.2	101164	68598.4	76104	96241.1	91950.5	72211.3	60992.3	96977.6	88304.6	85403.9	92578.5	137458	93621.8	92442.3	99938.6	115156	113628	114217	164721	161824	138637	93321.8
P08243	99812.6	90616.3	147339	121518	81128.7	148864	133873	112925	369643	313877	431415	341934	81307.2	105105	104821	107873	85958.1	88518.7	130096	129729	136767	150359	122579	196645	71023.2	92093.7	123674	112607	56570.7	73155.5	97100.5	71432.7	41291.5	40746.2	61700	44318.5	96963.4	60878.2	91765.3	63240.6	88328	66198.5	68033.8	78019	121655	131246	166376	249743	39104.4
P08246	326263	169051	267585	239766	366641	446302	199943	215481	319915	105637	450150	177502	84344.1	137123	112399	107071	184320	62332.1	139472	77315.8	94086.8	90714.6	76049.1	134321	238303	260289	275022	241565	331833	189860	372631	303765	389270	140006	438583	182423	60521.1	64126	130507	78475.4	82827.6	98090.6	120694	95416.1	114433	227225	178418	131424	113455
P08253	NA	NA	NA	NA	NA	NA	NA	NA	NA	NA	NA	NA	NA	NA	NA	NA	NA	NA	NA	NA	NA	NA	NA	NA	NA	NA	NA	NA	NA	NA	NA	NA	9259.46	NA	NA	NA	NA	NA	4991.5	NA	3682.96	5993.53	3968.33	NA	NA	9618.44	NA	NA	NA
P08311	239488	164768	184827	296995	269830	498183	278923	213636	377759	172706	508235	185940	91453.1	137738	96641.2	86937.4	190756	66993.1	140704	111048	83232.7	89867.9	75506.6	196481	217361	297739	319917	284015	261236	178399	590986	484973	278893	159526	772495	251288	106776	110074	210372	111440	114609	162575	197859	125620	214466	550931	289450	166210	137126
P08397	61283.4	66427.6	73808.9	75650.4	69557.6	105018	77037.5	73766.4	98579.6	90545.3	117907	120387	73488.8	106704	86431.2	81258.6	87834.2	80666	96125	62829.1	81381.1	87328	70237.9	104813	46207.3	66460.2	73979.9	68803.8	55552.6	65623.4	69524.3	65122.4	50625.1	51818.9	71472.4	76755	56427.7	65248.6	109763	62013.1	65384.7	67222	72894.3	91988	80783.3	131036	121009	117651	62224.2
P08559	100409	87683.1	93613	100466	100411	123300	104839	106362	116448	101360	150295	120017	95023.5	132670	113068	104237	113895	110991	134923	101567	107354	126954	144374	121874	74980.8	94089.7	93516.8	99546	99879.8	82218.4	111868	113020	106033	79257.9	117785	108832	114635	110334	122119	101330	111781	97795.6	110246	115760	101498	159167	149911	132371	123237
P08567	122678	85461.2	124203	120221	110505	146614	110888	103607	162240	100834	193003	134769	149069	245804	167077	157531	199360	145185	188062	138895	164209	166457	135494	189089	82034.9	110788	126661	118421	104040	92894.9	118034	119389	127707	79911.6	125910	111612	62650.5	100045	161140	109759	98168	107268	124635	139295	122293	221770	201885	217415	137794
P08574	250670	171229	237917	219574	231586	284716	223786	215468	252853	184530	262665	258783	197079	299169	236339	244054	278117	209261	311137	241285	230095	230163	190331	307573	172425	201014	230900	222519	218496	187482	238898	253801	239746	154205	265938	232812	203467	217753	289661	190774	235901	218377	251965	236559	214094	332649	300324	230164	201329
P08575	124391	102662	149544	131234	109876	138917	117840	115774	112188	108867	151156	147287	100313	155647	138780	133107	135922	114733	175744	165443	106980	120562	122628	150279	86561.9	101885	125393	127771	112922	108644	150389	157313	116472	101938	145138	138113	88235.2	93788.6	115715	87455.4	86736.8	98611.6	100201	99062	85021.3	144511	131069	119830	72351.2
P08579	109524	94783.5	138460	128961	97063.8	140643	131381	135212	134289	117676	153519	139797	97636	126477	114878	114198	102797	100642	144449	135000	117525	123810	107562	144920	77589.4	103252	111923	114160	83683.3	89603.5	111904	112920	79553.6	55809.2	103407	100674	85863.4	108479	141948	106640	98496.3	112702	122895	119191	122899	164460	151994	153108	100476
P08621	145352	115016	185054	161901	128904	188524	149840	143801	187206	127201	235696	205528	117843	182093	166633	146284	152673	123983	190059	150123	125839	157044	131825	187335	99686.2	125377	165852	159609	113971	120227	169675	162237	114376	80617.6	155923	120203	116855	133381	198307	134724	123314	138014	172126	152532	174325	241951	245818	221653	125525
P08631	88553	70149.6	111106	103388	93750.2	125844	83559.9	88994.5	111375	87998.2	157425	139965	115186	243962	193330	182052	192938	150183	211226	148670	127568	146488	135868	207845	65826.6	93944.3	106707	103720	84745.1	79825.1	115851	117611	90627.9	71490.2	117304	108386	103458	109326	140367	90027.6	125409	128889	130113	121281	113774	179688	163515	132082	117510
P08648	167854	146490	204669	194032	162787	213920	182516	166460	200628	170215	230851	219469	78940	121989	90875.4	112097	131181	109543	131815	136727	105253	122094	106398	150151	118715	158368	182261	192071	134994	129520	168487	167531	130303	90131.6	141236	150665	84147.7	113520	135032	90627.4	98057.2	113978	109354	127721	121905	188097	175767	162321	111570
P08670	434732	279693	402506	418327	426943	532898	420976	391056	307380	254039	512442	336017	300605	472914	419692	397000	468474	391126	539778	409246	329871	406391	319197	416608	295305	353725	449489	418174	327581	312649	435766	409533	288182	222224	426805	317119	304870	408780	585009	392204	404623	491055	541697	455581	527558	830630	596958	377559	422641
P08708	264402	239272	287798	272737	272951	361871	275323	262215	344531	218841	384660	320788	226920	329997	253479	260180	304299	249061	300991	267576	259901	294143	251999	305345	203463	287733	301782	255046	208789	226740	257988	246466	192797	170735	246014	186155	176072	208987	317578	229454	206575	221957	265397	277395	268540	354280	348050	352499	207076
P08754	250501	229343	319612	286556	229900	302831	270835	282513	282786	242448	360282	329086	208950	307069	285664	267158	273361	266347	313643	325437	255547	279827	270519	306718	179402	238037	290317	284262	212173	254993	296689	273448	210893	197652	262226	221591	184454	209413	288619	204596	206138	230081	246677	224444	246792	358424	322931	305651	189861
P08758	187704	146532	201701	172118	174593	219372	177063	176797	169909	154642	223605	240209	147512	215573	182998	165895	206817	182141	220154	186965	169623	186087	158487	201416	137048	144358	178466	173524	176147	167888	228019	228781	204909	157691	239717	228332	88409.3	114376	153491	104924	101074	116497	132083	128321	112362	193256	159367	136716	130169
P08865	615797	445270	650700	659497	566524	808690	655136	640046	789105	592107	875934	707068	439319	709434	658699	646048	605571	455561	792151	583683	578558	588489	573367	802507	429379	550814	668521	654213	472696	439040	655460	644995	437190	338631	604710	501444	321928	401320	660133	452240	436747	469912	531168	581404	537483	784475	770505	802668	428448
P08962	136771	48052.2	301046	107659	92881.9	115228	61391.4	297653	89646.6	234700	109093	317216	41759.9	77539.7	86862.9	80518.3	80232.3	225119	113211	419736	35909.6	46998.8	348305	114832	94676.9	78130.3	79979.2	87355.9	90782.9	275072	97360.2	125093	115716	30250.7	157066	408865	169330	152876	170029	118039	149227	144607	169148	97749.9	173027	216688	132793	96086.5	226206
P09001	89387.9	69714.3	100353	97932.4	81125.9	114475	90275.8	98799.5	122707	90507.1	146725	108122	83574.8	110614	106399	99009.8	95604.8	82445.5	117914	105551	89352.1	96843.8	97191.6	130117	63712.3	80472.1	97048.3	99163.4	63760.8	71503.9	94094.6	92924.6	54802.9	54392.6	83929.6	75805.6	73840.8	64840	101890	73885.9	81030.8	74672.8	92927.6	100137	94995.7	136874	138061	138123	91482.5
P09012	238199	164393	300251	247167	201844	264773	239651	270940	286045	227410	318516	303831	178127	259032	243041	214151	221452	174448	278436	266123	205876	217407	202404	290040	165912	202198	237784	228827	173835	158391	256329	231761	164834	124567	211795	213925	176739	208141	271423	204567	192257	201890	233681	234904	241858	339234	346574	296370	201511
P09104	836930	605693	884473	760995	738604	1160894	756719	979862	785540	1.19176e+06	867661	619804	938905	1.01005e+06	810257	551748	727910	915869	681493	1.19996e+06	556376	1.10417e+06	983277	710864	569654	550221	761416	668016	552903	719292	704884	647905	436903	591077	631920	941990	364839	641863	862948	534689	491929	676236	566752	678190	544412	1.30825e+06	758526	1.03747e+06	419210
P09110	90711.6	68441	118745	116503	100879	133512	99885.4	102587	116701	92098.4	139682	141144	100150	157928	136527	129325	147700	119242	162747	127500	119702	140170	119694	152054	70170.8	86422.1	107668	95861.7	96846.9	92875.6	123896	115822	127613	98040.6	154491	134483	85238	107823	153078	100889	109748	123653	125449	134267	104657	207641	169034	146803	159963
P09132	51376.8	33510.1	49577.6	56818.6	52420	67562.7	26029.3	39767.1	57826.6	33261	65807.8	50473.7	32171.8	67318.8	61782.4	50054.4	61042.4	31848.4	78169.9	49189.6	26326	35106.8	28910.8	68750.4	40829.9	46376.7	49805.5	55823	42460.1	27253.4	59729.8	54354.1	41639.8	18942.5	44932.1	5266.43	60416	53543	70633.8	52567	57232.3	51845.3	63966.4	58430.8	54211.9	81888.5	73467.2	54672.7	57119.5
P09211	652980	403641	655479	682852	589508	731394	632560	559670	666831	479794	960074	673036	461778	832043	806540	766657	716369	535419	977520	623787	508549	638787	534397	871009	464356	589895	716708	707767	535071	436749	790613	747535	530946	371695	772084	587007	694985	879554	1.20982e+06	914200	863502	938100	1.06933e+06	1.09114e+06	1.02539e+06	1.57945e+06	1.4934e+06	1.23203e+06	999287
P09234	119141	110914	97005.4	141250	141966	173102	103815	NA	145760	NA	253926	119292	143422	174380	108007	104950	175845	90537.4	153611	NA	NA	126462	183487	133285	120510	137951	126627	147780	129869	101049	134520	127078	131599	70936.6	92100.5	65518	300723	112204	164156	157369	118723	197621	167959	154211	127950	246176	293804	189769	150222
P09382	1.6438e+06	1.17921e+06	1.69963e+06	1323142	1.7235e+06	1649670	1.39452e+06	1.19088e+06	944373	707028	1.48929e+06	1.04772e+06	761502	1.30557e+06	1.16141e+06	971178	1262681	823042	1.38024e+06	1.03624e+06	702255	751830	629924	860830	1.24641e+06	1296988	1.52092e+06	1.26737e+06	1.65473e+06	1.08722e+06	1.85729e+06	1.70784e+06	1.357e+06	674433	1.48221e+06	876458	1.63359e+06	1809975	2.02115e+06	1.40647e+06	1.84015e+06	2.0238e+06	1.96716e+06	1.78632e+06	1.4086e+06	2.42947e+06	1758850	1.08861e+06	1414413
P09417	112857	108428	142915	115964	117904	156784	144330	140804	166968	137513	182390	218409	104435	144529	118428	106638	132198	122748	144507	146290	136036	153472	126559	153826	89150.7	101322	117956	118989	105900	109070	115517	112997	104313	91992.1	118841	142360	61518.5	74659.9	111831	70018.2	78873.5	81240.7	91876.7	95782	102956	160694	141145	124838	89698.2
P09429	466710	302950	448944	505384	420936	612818	448106	387947	650303	336551	768413	519572	318585	503576	441354	424121	439417	292318	499373	324782	325374	373218	300337	498980	325861	354019	470198	519650	377334	342013	502098	502994	341275	195664	464032	324623	282195	317643	590419	361820	273995	360813	431077	377448	440237	612880	641371	588666	295707
P09467	155111	134942	203538	180046	178490	207136	179808	165295	183060	136452	239784	176186	210446	274770	233077	210226	242669	205737	255425	202745	240205	229230	191506	260346	110887	145709	184250	182480	139957	148847	200396	187918	160713	136933	218457	195579	72260.9	101131	140692	141894	79807	105382	126650	214969	86607.1	192001	215355	303909	239050
P09496	95671.4	58455.7	193158	118981	95502	141373	88966.1	139927	105937	63080.9	138052	91721.4	62654.9	122220	131538	103533	101378	99878.7	131673	162866	95173.8	93931.4	63538	120511	66762.9	91427.1	116683	108027	79676.8	57914.4	128971	112424	72694.6	37593.1	100202	91100.4	108218	115766	137203	114848	105589	116282	119898	119526	143162	166579	148019	118325	108417
P09497	62722.6	63240	NA	77453.5	63573.1	90978.4	86763.7	108350	75896	44128.2	100826	62040.5	60447.1	94797.8	91046.9	73930.3	78017.7	74675.7	102782	127357	73542.9	67260.6	76553.8	77119.4	48657.3	58950.9	74011.5	67593.4	60521.3	58296.8	86637.3	74263.6	57450.6	41432.5	82851.5	NA	68721.6	131066	95790.4	74302.2	73194.9	80259.4	96116.6	85444.1	89787.8	114947	109284	87069.5	75730.2
P09525	152790	126577	198040	153265	153773	193622	159303	164452	160830	139325	223161	189796	133598	200590	183287	174636	189132	159829	212167	183695	147375	184551	149437	193315	107916	133320	160143	159521	149189	142191	180744	187882	158091	131551	204635	180711	95417.8	118631	171174	116521	116959	130596	144061	151753	134135	249503	205387	170989	158712
P09543	57444.7	50933.4	72778	67420.2	58937.8	77108.6	69624.2	59861.4	71637.6	55874.9	89461.1	93746.6	55889.4	85967.3	73038.2	68941.4	73509.3	62496.6	92598.1	83335.4	68719	72376.6	67821.2	93015.8	39095.5	51993.7	63124.6	64046.2	50722.7	54058.1	67807	67795	59109.9	50139.7	71563.1	73346.1	82660.3	80776.7	105418	75166.2	79683.5	81323.5	89874	84109.1	94333.2	148096	125863	107048	92484.9
P09601	59008.7	NA	NA	67019.8	NA	91469.3	136973	NA	NA	NA	145071	NA	NA	76938.9	82587.8	73610.3	95155.9	161176	282781	145152	NA	99873.7	74570.4	95216	38202	56162.4	58461.1	65775.8	65709	88986	84126.2	72283.1	58825.1	53710.6	81876.1	76537.1	67216	109864	79991.7	83278.2	107787	90769.9	87557	97887.4	79427.5	87664.4	121416	136048	NA
P09622	91211.4	76662.5	130661	105348	95427.5	132306	108579	117922	114821	94954.1	91807.5	168051	94160.4	133982	114968	108081	123910	107037	132947	131839	100639	120618	93147.4	127174	70404.8	88129.1	101173	105098	90360.9	96248.6	116616	116771	116930	87586.4	124452	122837	81271.8	79165.6	112147	71847.4	86772.9	84635.9	87255.7	87635.4	94887.6	143161	123103	110423	102291
P09651	115874	65844.2	63633.9	144454	122153	205689	91500.3	43028.5	189443	78796.2	239183	48237.1	87188.6	203957	170357	158890	139577	55595.2	173675	35216.6	72599	101622	101405	207314	80498.9	140609	154566	151601	93182.5	72267.2	134636	117718	70589.6	34721	106206	22236.9	82646.6	99660	190595	117723	121500	126754	148966	139611	200300	209000	240831	229921	114833
P09661	449708	332237	466163	460916	389158	504489	421538	417184	548818	414528	643131	542656	328486	494106	428620	432196	459558	368555	500793	414391	382687	407265	384053	521648	307840	404649	458544	451559	356469	331432	462225	456700	353185	284333	433080	396023	314278	366482	538595	374078	322884	399049	445869	427082	438075	616376	614597	556924	367493
P09668	58107.5	99298.4	176686	47364.7	65185.1	96906.3	74573.8	152658	76430.4	152673	74639.4	198280	81209.8	63626	49950	49193.6	84359.6	189464	84854.7	177887	110405	178494	179924	76356	41551	40364.2	50273.6	46027	57591.3	134345	57893.9	52949	54563.3	147339	63581.9	218622	23087	19363.6	32073.3	13070.4	24578.4	31834	24029.9	15078.3	NA	40072.6	26888.7	21398.5	20117.9
P09669	190116	158979	283959	225114	190248	257873	222424	244360	250521	185874	318660	320529	134064	202266	201221	184746	197168	176207	234943	230019	176743	227629	159117	237467	140594	165997	223488	211907	164397	170825	216974	232986	190987	156727	228937	216072	152166	124852	163576	126729	150121	135673	150860	148723	168744	252486	203275	183324	139434
P09874	155875	129457	193284	170046	142249	203939	174068	178680	206268	178494	263404	258618	138879	187948	172943	167752	169438	145683	199537	181048	153963	180832	181839	218289	108771	137027	169279	172839	124711	142760	174035	171936	113706	106292	152512	151273	125890	158701	241491	165689	141388	167725	199999	190679	198633	294820	299883	277771	178493
P09884	67826.8	65769.5	91736.4	74410.7	59890.6	104323	99792.6	94285.8	107299	82468.6	99775.5	102146	55882.6	59627.6	58151.3	65746.6	59182.3	55742.9	70948.1	72530	83883.9	89141.1	81086.8	96421.6	45085.4	57583	69545.7	76062.6	41597.7	52682.5	58711.4	53018	30435.4	29325.6	44330.4	48199.8	29682	40600.7	73570.1	48225.9	44235	48716.9	56203.9	62496.9	72469.9	95349.3	105829	101604	34209
P09917	NA	NA	NA	NA	51711.8	NA	NA	NA	NA	NA	NA	NA	30237.3	57483.4	42677.5	41399	62857.8	51313.8	49429.3	42494.6	36934.3	46736.6	26464.1	51019.6	NA	NA	24427.9	34279.9	45495.8	35785	42203.3	37194.2	61494.9	40215.4	50773.8	44789.6	23437.1	19498.7	30936.4	NA	9081.15	37952.4	NA	31747.2	NA	26127.4	NA	NA	19194.3
P09960	202873	132196	206015	226467	185611	267918	171282	158431	230790	148377	308801	195619	117772	190609	175926	160724	181597	117740	204713	155431	140019	130645	157885	206146	141222	172950	210113	220997	169339	155595	244165	233209	173683	120465	227418	176906	49086.2	59678.4	89293.8	60337.1	54240.1	64391.5	67562.6	70265.8	66104.3	126972	110362	95625.8	65850.7
P09972	339344	224111	368150	313696	218057	254528	208319	208349	104539	185400	177009	213416	81591.8	153444	243929	189833	141288	118127	235628	154528	85239.1	131184	123413	156050	246856	244793	335432	308515	229465	201621	289081	246246	152520	117319	194236	158271	174628	303740	237862	279520	125926	227197	148321	229252	86241.3	221996	148301	149411	117908
P0C0S5;Q71UI9	392680	315698	467244	419756	377155	657067	484208	440724	682220	442957	967870	766417	310759	594359	501532	415204	551587	444355	545823	382951	450388	661404	385237	607740	212726	394298	578079	426771	281013	431137	361474	397251	312382	278485	420646	318503	399156	390671	797245	418334	381150	386085	509193	470189	713990	855527	1.12807e+06	950684	320401
P0C0S8;Q93077;Q96KK5;Q99878;Q9BTM1	1.23955e+06	1.07923e+06	1.84674e+06	1.88182e+06	1.6269e+06	2.59249e+06	1.64298e+06	1674294	2795133	1.86162e+06	3305261	2.94284e+06	1.2837e+06	2.81059e+06	1.88962e+06	1.73294e+06	2.21781e+06	1.68644e+06	1.97747e+06	1.49957e+06	1.46987e+06	1.83778e+06	1.41105e+06	2.33709e+06	1.17108e+06	1.63938e+06	2003896	1.67686e+06	1.46934e+06	1.35064e+06	1.94743e+06	2.02799e+06	1.50503e+06	1.04761e+06	1589524	1.3349e+06	1.69028e+06	2001260	2.54396e+06	1.7575e+06	1.61966e+06	1.63635e+06	1.92288e+06	1840053	2.72735e+06	2991030	3.09784e+06	3.30154e+06	1.29992e+06
P0C2W1	18610.3	11546.9	19103.4	22277.7	20913.3	29895.6	21791.4	23209.7	23251.9	13830.9	33234.9	31084.4	16456.7	28587	21996.2	20622.1	17771.1	19725.1	27902.3	20821.9	22054.9	32360.1	24369.5	25524.2	11856.4	17195.3	17209.9	20700.9	15785.1	17086.1	24113	20563.9	16794.5	NA	20578.9	19029.1	19488.2	24224.3	20649.2	20859.9	17108.9	13622.5	18047.9	16317.2	18732.8	35928.9	26861.3	21971	20033.9
P0CAP2	5395.7	5013.78	NA	5768.78	5508.57	10936.5	9005.6	5390.7	10706.1	8788.04	9382.79	11134	6616.7	6917.68	6871.2	5064.59	8782.53	7855.82	9777.04	NA	9113.37	10577.1	8438.9	7676.13	2076.4	7001.73	5838.86	5302.09	NA	4893.98	6709.95	5016.84	4663.13	2007.4	5655.01	NA	NA	8350.42	10660	4088.56	4660.22	9281.87	10287.1	7786.74	13578.5	19769.6	16195.4	14454.2	10553.8
P0CG39	3.35309e+06	1.15645e+06	1.5684e+06	4620467	4.64728e+06	4292657	4.1663e+06	980668	2208117	1.54789e+06	5.96496e+06	929472	828291	4521202	3.29835e+06	2.95142e+06	1956454	1.22167e+06	3.11702e+06	979132	932280	2708592	652140	3.42893e+06	1.59548e+06	2.1492e+06	1.93373e+06	2.09133e+06	1.31973e+06	1.31273e+06	2.08222e+06	3229952	1.97193e+06	26464	2442764	29979.8	8847693	2990633	3.45615e+06	3908249	2.20932e+06	3422025	2826075	3372023	2881330	3541855	4.96014e+06	7303172	3.00882e+06
P0DI81;P0DI82	83168.5	134791	194295	80584.8	84786.8	111216	123647	128232	92225.5	92766.9	125328	165514	67046.6	95082.2	89012.6	70801	88064.6	106463	115746	153306	71102.4	111862	140874	112079	34293.9	75618.5	82963.4	80493.2	65056.5	74216.7	88971.1	67956.1	64627.6	96156.6	68902.4	164486	55668.5	75170.8	110203	60650	95253.6	79482.4	77145.2	96591.3	92008.1	183456	114562	114637	67355.5
P0DMU7;P0DMU8;P0DMV0;P0DMV1;P0DMV2;Q5DJT8;Q5HYN5;Q8NHU0	260365	222551	368970	242036	187066	291131	274526	284247	346120	288694	339702	327734	209692	276201	234262	175780	236723	300579	249064	314722	262608	271089	317620	298664	185465	213168	162737	268633	169015	213581	240697	235023	174070	179887	170817	379340	NA	162374	259143	178397	149708	209587	249542	255269	207574	237722	340696	303201	121443
P0DMV8;P0DMV9	287802	197250	288303	279820	258842	349445	267454	269302	272912	198526	325386	298586	191751	307891	265218	262791	282728	225064	328955	277875	223466	245358	223893	291408	202890	243892	275913	270985	212497	186925	262517	247535	207125	155424	225015	219783	243800	278697	376813	255601	324909	312963	331955	319448	350205	472449	419034	348574	235942
P0DN76;Q01081	129226	93107.2	109447	121618	132337	137878	109448	149550	133791	80371.3	152343	99616.9	98734.4	135753	113209	103591	140773	65809.9	141943	85528.9	72965.6	79928.8	85126.2	106645	102937	125011	113944	118688	116544	80857.1	122335	107927	105539	73302.1	107771	64704	161684	160083	178564	138565	135319	147635	167706	145914	136779	211027	180503	131923	141966
P0DN79;P35520	49965.3	76565.5	NA	49185	40241.5	60443.4	85011.5	94561.1	114628	76332.5	112576	80234.2	NA	52034.3	59431.1	51317.1	37084.9	29218.3	68686.3	NA	65220.7	69065.2	76123.2	92465.8	28813.7	42097.1	68530	52992.9	27344.8	56331.6	56315.9	47137	18176.5	NA	40238.7	NA	30571.3	50447.6	62754.1	39849.3	30399.4	34254.6	52065.1	32411.3	47992	58984.4	80262.9	86641.3	19718.7
P0DP23;P0DP24;P0DP25	190220	183016	297093	251926	175829	358202	238924	239348	259422	222438	412369	432478	175292	411273	291576	232096	301685	276649	314858	255384	179433	310220	241073	377484	138151	277492	336012	236272	157490	219184	236519	215730	127895	162624	204259	166665	98684.3	177173	238311	181464	155574	156503	199264	201158	333080	287224	299663	248636	164258
P0DPB6	95162.9	102088	114128	110443	98130.1	139733	125466	119854	123332	99851.6	153827	175355	111206	112608	96721.6	88159.6	98550.8	85076.1	113646	151076	100401	108163	93475.4	112224	78217.1	95894.4	112414	102137	76630.6	88714	107363	90095.5	72939	70069.3	76971.7	85718.1	60550.8	69017.7	98992.4	59150	64316.3	68021.1	75047.1	75802.2	77014.4	121225	111195	96168.2	58844.4
P10114	51236.7	102574	106698	NA	NA	NA	NA	200307	74570.4	110020	NA	219012	119146	144095	123945	138067	NA	158108	167496	185384	150793	157778	144948	131770	48315.3	48921.1	NA	42031.2	69039.8	110238	64250	NA	77885	97164.7	92951.8	145516	NA	27622.5	NA	NA	NA	NA	NA	NA	33973.6	NA	NA	NA	NA
P10124	494213	237684	224279	351777	606393	457186	372034	165188	252104	105028	342520	99849.7	183972	404057	356837	427370	447164	186121	482173	139110	238119	219918	117530	293391	277580	377516	345016	294878	293587	100862	227536	273351	238233	62203.3	190345	44564.3	171744	203430	234902	226792	211653	244490	266303	388587	205382	229445	152229	175605	194211
P10153	470667	376993	465793	419224	532765	669803	470841	447276	487437	341587	600753	519889	240025	318152	246285	236401	399224	262800	355844	293826	298862	304855	267636	381425	360544	400866	421649	406113	500730	500743	679840	719103	642633	450993	820382	840162	153793	191209	254572	172246	201548	250720	256056	244324	264492	484129	314799	248194	187895
P10155	76035.6	55101.8	84707.5	71276.8	67218.1	91118.1	84203.2	77639.6	88849.9	70867.1	118296	92944.5	54861.1	81898.9	75318.4	69336.4	74990.5	58967.5	88100.8	68711.3	65342.7	69991.8	63487.4	91370.1	47425.3	60355.3	74557.6	77011.4	57096.7	56369	81366.3	76117.7	57184.7	50739.7	75112.6	74349	42529.5	57049.6	79644.6	55735.2	57358.6	61659.1	62933.7	66089.1	64284.6	103505	97572.7	93982.6	58491.6
P10242	NA	NA	NA	33271.4	26146.4	23115.6	NA	NA	25767.5	NA	41338.8	NA	NA	NA	NA	27417.8	NA	NA	NA	NA	NA	NA	NA	29635.7	13784.6	13897.1	NA	30397.1	NA	NA	NA	25464.5	11627.7	NA	NA	NA	NA	11395.3	52691.4	913.643	1984.47	967.614	3592.96	53813.2	4872.84	4776.6	6002.57	68950.3	1355.97
P10253	96153.1	71328.5	93979.7	98924.1	94321.5	124517	86934.6	75936.5	109499	68821	147633	94908.4	74564.6	119510	104867	97964.1	119197	86078.2	148657	94602.6	92187.5	78531.6	95830.5	128535	71021.2	71117.5	97491.5	93371.6	87092.6	64486.2	123969	112787	121555	90003.1	135791	110014	94588.9	108304	145270	97567.9	111963	106828	109424	119470	114272	237731	175319	152918	183946
P10301	108211	56932.3	168786	NA	100811	89499.2	NA	138456	80676	NA	104475	NA	63590.4	90378.7	120248	NA	85236	78706.2	170103	100541	68027.9	NA	NA	NA	86081.8	76087.4	NA	101295	104919	68969.6	118791	107654	118729	80893.6	137973	100432	100746	86023.1	94418.9	69938.6	94030.8	85826.7	73871.1	74780.9	69247.4	117702	101484	69570.3	78142.5
P10321	242627	52922.7	NA	256748	261877	337843	76925.5	NA	254200	20063	234632	NA	50729.6	320472	248884	242360	268884	28235.6	309226	NA	56897.5	65309.3	88270.9	309659	169107	234116	222335	235660	207136	38217.7	277183	291125	215798	71035.3	236884	32285	146969	85311.7	117373	102432	99252.8	118430	141133	156358	134055	184994	174383	150677	115010
P10398	107635	90947.3	117938	117478	96192.3	133102	127903	123699	133294	86365.5	150809	156071	75311.3	143666	118127	114349	119193	92243.5	149946	122208	111373	115022	113036	141476	70651.2	88613.6	95190.6	106678	80679.1	68740.2	118614	105858	80742.6	73400.6	101087	107602	60235.5	75532.6	107527	78758.4	75679.1	80394.2	90016.9	79632.2	90652.5	133464	121839	126820	81771.8
P10415	276614	180981	258267	276887	229616	296911	153837	163299	312897	265721	358457	203688	166536	286418	285772	251485	242576	200089	310226	236723	203458	206652	195953	325762	195192	225551	251990	266875	198220	157630	259507	253405	190188	104136	200769	133184	154216	208486	315053	186327	239425	221833	197740	214845	221843	352069	286999	267382	275216
P10515	184818	158675	253962	206886	178427	243576	220899	245528	240997	221744	314183	284774	159949	253278	219468	209614	206993	210574	263753	249496	188962	235785	228018	267164	126560	173109	204643	205572	164680	162041	212920	224370	207502	175552	225653	248969	120808	127321	180787	120303	140397	140757	139391	148951	141968	232291	211019	204851	154209
P10599	1.08161e+06	730949	1.19072e+06	1.09287e+06	906190	1.26535e+06	1086224	929578	1.12175e+06	1.01188e+06	1528711	1.28054e+06	966581	1.55948e+06	1.35687e+06	1.24848e+06	1.19163e+06	886846	1.5447e+06	1.06242e+06	965763	1.09626e+06	903058	1.34324e+06	772870	924691	1.12795e+06	1.0729e+06	833514	756363	1.17835e+06	1.12298e+06	694222	487997	968334	624555	515800	560707	864464	662200	569042	651719	759380	697880	624013	1.0113e+06	902643	798708	666008
P10606	229157	219187	347480	266673	250487	385987	275027	273488	386456	281364	467230	457376	195103	328967	270400	245046	294191	255242	311998	314002	254206	337458	254914	329450	185365	252735	291360	263877	221655	269937	271853	276300	234049	250319	296001	275948	161115	174676	267150	151583	176675	177645	206832	181188	260243	375708	324506	299881	180242
P10619	80202.5	43016.8	74404.7	89574.2	96086.2	126020	87760.7	59849.4	71216.7	49210.3	81521.7	53861.3	93121.2	176811	156797	127242	139909	121124	172140	126694	112808	105140	90662.5	150418	63178.2	67279.3	84896.7	91077	80629.8	74454.9	126721	95808.2	100504	56105.6	121427	82757.1	107348	125534	180628	126917	127696	143958	148454	145236	137432	249097	204526	179828	157024
P10620	383598	250803	334667	356292	370028	396776	307378	283663	276274	196014	349692	202313	195658	215480	255273	217363	242914	168326	331666	234348	191741	196347	201506	240568	287441	267103	292926	322137	317304	210307	378659	358446	342157	229717	373930	332297	144010	130316	199049	140057	136418	159238	180079	159415	123160	270151	205199	141426	98690.2
P10644	119641	120380	161314	135452	115916	152856	129636	130907	137960	116989	157693	151499	148839	195840	167699	158670	144608	137847	196957	189073	153051	175296	165214	192282	87474.3	101323	130028	133272	95753	96840.3	132636	131211	98427.8	88010	128259	131104	101116	111396	149942	110079	124093	133808	137566	144193	131878	207610	179128	159645	140042
P10746	40154.1	39365.1	61644.8	44121	50048.2	77885	81863.8	56932.2	64333	64301.9	68221.3	63817.4	43841	69804.9	50262.9	43634.5	66688.5	49908.6	61445	45363	71736.5	57443.3	47762.1	55480.2	33403.3	31388.9	45685.4	41638.2	30681.5	48399.5	50413.7	45932.1	30264.9	31205.7	48856	35571.5	48007	54159.3	89347.7	47356.4	53695.6	60775.1	62868.6	68340.9	57149.3	103389	85108	80748	67404.8
P10768	240083	193109	287559	254329	238405	298827	250102	249211	266080	207251	341067	281905	180254	256767	214538	212076	237719	181099	245365	239507	191615	208400	170134	223625	175747	210345	252149	261232	209541	195161	274237	267690	207312	145810	253830	238064	140190	139889	188521	123956	134113	147386	160086	156280	140974	239302	205406	202034	145988
P10809	359656	269503	423028	390502	324873	479501	376216	395823	469816	336595	592023	455818	271498	403608	375943	352873	374782	307930	439612	388356	322238	378511	365059	474236	249938	334353	397604	385390	305618	299053	379149	380036	368503	273749	413992	381776	285088	283936	401084	285109	332113	307359	330831	339987	385347	557953	521864	507658	294529
P11021	557444	454048	656113	652472	516864	775799	601781	601744	687920	506959	769998	624225	516868	863504	753976	689179	702209	586955	862681	661799	622582	713895	619797	890232	401906	543283	668011	640056	416510	437067	608749	586610	423033	340180	590921	472304	279314	343934	514947	348419	350411	370648	417719	417451	467581	670139	635409	581344	410266
P11049	63480.9	105472	201910	114370	NA	92996.6	154636	192522	110990	NA	143368	196096	74952.1	100946	106749	107008	85817.2	118039	129512	NA	123635	123081	138552	125764	47482.6	74051	104253	109718	49815.1	109613	90097	69293.1	61955.5	NA	77581.7	NA	64989.1	103805	126192	93260.4	61657.2	58840.5	106138	101946	63790.3	100341	136772	116795	63664.2
P11117	NA	NA	NA	NA	68605.7	NA	NA	NA	NA	73852.2	NA	NA	70922.2	96422.2	114905	NA	92130.1	64338.5	142913	124968	NA	109117	92733.9	NA	NA	63523.7	NA	NA	NA	NA	NA	110088	86913.2	99966.2	NA	120299	NA	91483.2	107126	42606.2	52317.1	58632.1	42538.6	92780.3	NA	NA	NA	158731	99764.4
P11142	977462	720344	1.10167e+06	1.04557e+06	836373	1.23717e+06	990682	960870	1.10329e+06	747354	1.22585e+06	941325	611693	972027	902068	856294	833611	672089	1088642	836211	790220	868077	762721	1.11123e+06	678914	860996	1.07482e+06	1.0128e+06	628799	588169	857731	824921	490334	407028	714498	587578	572943	673525	982095	711023	711096	726755	856344	821734	924467	1242360	1.18874e+06	1.07712e+06	618989
P11166	97019.2	69366.6	98905.5	89636.5	69958.7	100902	75904.5	90887.9	110059	82425.2	93875.7	106480	41292.7	62173.9	59345.2	50877.7	73265.2	52697.8	68331.8	69465.9	54287.2	63675.2	46142.9	75480.6	61213.9	75045.6	83394.7	85177.7	72433.7	56955.8	76675.8	66662.2	61368.2	37940.3	60077.6	40917.9	107058	125175	158363	111390	123124	129017	128203	129116	129250	192267	171189	148200	77851.5
P11169	205276	141653	223616	146342	134868	131038	88175.9	128315	107659	185304	150873	260534	32372.7	68138.9	78897.6	59390.5	70312.9	37523.8	84304.7	62915.2	37798	55884.3	53752.5	80736.5	130516	99380.5	135708	122552	125696	95911.7	114096	115930	127475	80198.5	111030	79585.3	63315.6	69692.4	65344.3	41623.6	67926.2	65567.6	42291.8	48621.7	50219.1	78795.4	57788.9	66325.2	22892.1
P11171	123765	124748	188608	135214	123249	182130	154523	168916	146612	126373	189791	225291	128052	188840	150330	155948	153724	160352	179124	195891	153041	186643	141184	188903	88367.4	117804	134705	141388	104703	122864	140509	147202	105641	94585.6	130113	165585	82472	99751.8	155791	90936.4	94407.4	108678	122138	126880	122688	215722	172166	158895	94930
P11172	186719	164651	263545	216496	163193	245816	222884	226824	237476	204513	304190	300581	134965	201310	198108	189433	165649	172671	234784	207361	181169	194395	181787	241753	128195	170300	208963	212862	131727	134296	196729	187808	127461	119526	177675	185042	105974	124654	195736	130611	128745	137452	153929	156794	166618	244726	238270	227904	124873
P11177	177554	128631	187869	165059	149496	205151	145855	169741	202730	155532	237229	234639	132359	224147	194713	171169	195590	153954	225677	193484	165061	182421	174355	229290	119601	150179	173842	169582	149880	132886	188176	185286	172851	117887	201584	192534	123624	148322	208102	132639	159392	153784	148248	166183	160153	267502	220936	208604	182269
P11182	74838.1	71961.4	128533	72537	72915.2	88982.1	85467.3	69288.1	86418	74478	91121.3	98936.6	63163.6	113183	96831.8	82227.1	100967	85870.8	113728	91679.8	87504.4	89191.1	88421.1	94415.3	49799.2	60162	71773.6	72557.7	69116.2	69707.7	81827.5	83304.4	90630.5	65910.6	98957.1	108080	41393.9	52477.6	78742.3	43793.1	60672.2	58327.2	57085.5	61390.5	57866.2	110986	72480.3	65828	75761
P11216	124461	106291	173400	133410	116942	163963	151823	148968	147024	129780	210546	201154	124637	175833	154839	148087	150702	147451	190042	175649	152825	168533	142263	182973	89873.1	109121	133781	131298	105984	119358	149200	139776	117620	108129	154853	158468	78001.4	89927.7	137539	89176.2	98828.1	102254	112324	114582	115180	186464	157465	138602	101399
P11217	251896	191657	282251	242524	216158	298010	246420	233429	283341	203406	363863	302722	182060	305877	286072	262310	274437	224490	336730	247371	234546	254429	200807	333471	171742	219761	265128	256800	196456	191953	278742	273930	192238	162586	279458	238735	165558	195210	276700	188293	203351	207947	246481	230734	230025	338723	315383	271313	180436
P11233	86948.2	55310.8	62125.3	75595.6	76146.1	86048.9	73192.6	61638.5	82121.7	72225.3	92086.5	109026	49808.5	83693.6	74876.8	65366.8	84771.8	61187.3	94957	74742.4	67152.8	54885.1	68523.3	87290.6	56571.2	68585.1	80223.8	68061.1	77644.6	50685	81510.7	76965.4	79453.9	55301.1	85247.9	70653.5	72385.5	70376.8	84070.8	60017.1	80540	73815.3	74668.5	75799.1	72715.2	107546	89931.2	85511.5	69635.3
P11234	202184	189942	307231	204943	215733	226008	318395	282135	198557	204357	274881	518898	131689	181079	175794	151503	194381	235277	206402	241761	151998	254155	241501	194447	146687	171561	199372	193976	194321	188159	220573	224168	200015	154713	231255	258879	224180	167577	217067	161261	167262	191177	176339	192432	191943	313141	249252	225673	174127
P11274	29596	20348.9	36770.2	33986	31217	45020.2	35564.9	30825.3	36295.9	26272.7	50838.7	43495	26692.5	44308.6	37788.5	33162.8	35936.8	27486.4	50943.4	39395.5	34682.6	37678.2	28880.3	49399.1	19058.8	27812.8	29172.8	31159.7	24121	22266.8	34829.5	31626.5	21629.4	17022.6	32185.5	28389.6	49465.4	53722.9	68970.6	55773.5	55712.1	57329.3	60356.5	60502.2	52418.2	95044	95796.2	68579.4	55682
P11279	194141	131735	211802	184579	196151	221227	172207	169855	208137	138432	220964	218244	141820	223006	181713	172935	199762	140247	258861	208435	158694	179800	181857	251359	145055	145559	173108	176093	179035	133077	226727	240194	245716	116190	249018	199851	138701	135629	154114	110563	131667	139992	135691	130473	128216	243253	184912	134392	202013
P11310	165135	146225	234648	198202	162422	229428	188241	202495	203503	186868	166479	284086	155478	225400	173260	170176	203087	181385	190085	189954	183372	212116	129337	209172	122171	171738	190095	184766	159335	193888	205424	204806	219432	191193	234287	251839	84768.1	83793.1	107585	76866.7	77434.7	86648	87851.9	94629.3	81400.1	147942	121664	134221	129282
P11387	152233	120196	167646	153359	134224	187746	152877	159161	193279	147654	225670	211095	116252	169721	148536	140869	147566	120117	162397	165453	132645	144200	136949	170613	109104	132906	153868	158230	117452	122559	152074	153564	118318	89710.5	143417	151168	132191	155563	210458	147668	142882	151631	171874	173401	184937	252036	254755	239537	150436
P11388	104826	104909	137156	133971	115786	223102	176829	176310	179610	121658	163896	135550	99352.8	100678	80320.7	97108	75461.4	72247.9	127679	128147	152811	155394	141666	172365	75491.7	105385	111552	130850	58170.6	66091.7	73804.2	65247.8	36779.2	38954.8	49216.1	77445.8	63840.5	70374	109107	78178.7	80741.2	80180.7	100139	94916.8	140265	168829	183294	163534	55383.7
P11413	167090	127281	207094	162515	162796	194088	178420	170065	146566	131234	234012	201843	156392	227228	227275	215059	203623	192691	295470	247550	168406	200537	189098	234648	119757	124670	163180	167623	157963	150956	208130	204431	182589	140375	232027	218867	167578	196498	300019	183617	210303	252764	278770	218596	219345	404137	319907	230000	213620
P11441	111376	102589	167595	104367	93241.4	137752	193453	177153	137681	116588	115434	234537	89208.9	104361	86592.1	103402	99005.9	115491	108492	205903	122419	134576	124633	120007	73516.3	93926.7	104538	103515	66632.8	98631.9	97548.3	91390.6	63656.9	87665.8	80603.5	163481	62823.2	79737.4	128864	87227.5	84270.9	95719.2	98104.1	103509	104541	166359	138705	155292	85608.3
P11498	68564.1	66395.3	90227.2	78699	63126.4	95774.4	97033.6	107857	84420.2	77237	128961	132011	70942.8	116164	100404	89408.3	95765.6	96193.3	117527	118962	86558.8	103325	94318.6	121239	46372.9	64014.7	75574.2	77800.1	58572.5	76921.2	81322.9	84750.2	68971.8	60753.7	87046.2	106283	33580	38371.3	59631.6	35331.5	37412.4	44023.1	44782.8	41096.8	46710	83770.5	68253.4	51542.4	45945.6
P11586	241077	185860	286150	257023	218187	315304	246821	266046	312830	241390	386256	339898	190026	279913	249819	240126	243145	199164	288416	261369	223835	245895	243039	312052	172375	218004	256967	256682	185196	190097	251591	250576	169423	154897	221536	207947	189887	204327	282562	216869	198984	208856	232146	246041	270297	357414	378819	378521	179554
P11678	409058	170424	233227	195789	320113	234847	201483	173637	260297	154514	248855	210378	NA	NA	NA	108475	110600	NA	131692	NA	NA	158485	NA	NA	245040	211634	205522	181074	323860	181046	218161	219904	418282	178811	208477	184971	53405.2	74679.9	64152.2	86076.7	71415.8	62194.3	75116.6	105853	78574.5	130019	64446.4	NA	NA
P11717	114462	96258.6	146769	116395	97779.5	134057	123379	115520	125469	114234	156642	171198	85193	110350	99596.9	90851.1	98322.9	88715.2	109673	108664	93497.9	99564	89439.7	105888	79589.8	97938.7	115297	112769	83050.6	93209.4	105061	101769	75458.7	69815	90578.9	95775.5	71509.1	84325.5	113871	81542.8	75367.8	89563	96226.7	87695.8	84845.1	144528	121605	103426	80402.7
P11766	170960	132723	202235	151769	141614	185637	173736	166362	162249	147122	212055	188265	142248	195402	170263	147592	163968	148046	205225	182187	148495	160596	151243	179487	108946	134590	163314	144985	135481	125707	173274	171964	144090	120119	170437	183049	131810	136871	176764	122927	141588	145490	147826	152622	143375	231376	202327	166181	154525
P11802	83980.5	83950.5	129888	93558	62112.8	103724	116537	128032	82012	91991.4	120305	101848	62538.6	94347.7	94298.1	97716	63572.6	76133	112612	114197	87287.4	116828	79691.6	102140	52535	61117.2	97102.2	80343.4	69856.6	56251.7	66680.7	72805.8	53731.8	31181.8	73468.3	83363.4	NA	83783.6	96149.6	91476.1	78770.2	98121.5	112970	101416	102658	147325	124058	115139	77968.2
P11908	232714	204711	322889	262535	186015	370838	324342	291555	314335	273478	471743	363607	210290	244574	248920	204479	199088	200435	278166	268742	241342	282883	236598	327401	151105	193166	250905	276381	149929	206627	250068	238781	128372	127577	206757	219685	112123	150357	237991	150934	146583	175920	174449	194174	212678	358432	361771	342941	154561
P11940	253098	230441	328978	290445	247605	407575	338396	328585	349768	243366	371507	309488	221185	313794	269689	260437	263821	222982	337266	292211	293776	298502	281070	359303	177317	243560	301234	286405	150261	176223	224773	217933	134230	128329	198600	193111	149365	185278	287819	199899	198353	213541	251794	253481	273763	389449	365083	352376	173146
P12004	353788	281075	397494	405665	321794	500417	431790	398841	457512	313804	523426	329256	261014	328175	293023	304374	252851	181166	357093	292404	323163	347120	337135	452853	245069	324735	372570	410927	197216	215951	302246	266090	106503	105030	166343	144044	188181	248408	382500	278906	216691	246541	316763	302089	349436	401515	486165	457138	163112
P12074	212263	146917	173603	313964	246680	398974	243646	192717	380509	235870	554010	243897	170183	309868	304030	212871	283939	195593	324642	117684	193441	236495	136349	331186	154940	213041	297180	317053	211348	219799	349121	271161	175088	134717	316998	142735	136118	163653	307572	193660	154106	224035	236941	229541	215402	436480	382202	189056	184579
P12081	273216	224776	375386	300987	246153	357438	324085	312820	354950	285889	438385	416828	235540	363706	314901	316311	302630	282784	394437	377347	303775	317561	304379	404432	183462	253906	292282	304454	209344	233738	296178	303945	186047	167157	275103	285204	214205	261145	378052	261206	261866	284500	317562	314578	320763	472859	465436	417506	260310
P12109	NA	NA	NA	NA	NA	NA	NA	NA	NA	NA	NA	NA	NA	NA	7450.41	NA	NA	NA	NA	NA	NA	NA	NA	NA	NA	NA	NA	NA	NA	NA	14770.3	NA	9962.85	NA	9683.66	NA	64921.1	43612.2	75253.5	32394.2	65517.4	74774.1	52977.5	54289.8	65269.2	130765	92495.8	50865.1	56665.5
P12236	365247	282229	429142	408907	355596	501373	401729	417268	468384	354152	532066	471552	345118	488492	450009	402855	455176	376268	545766	465246	413780	464698	438935	517813	260562	325259	377991	380915	314512	281350	420118	424781	374360	259869	427239	379953	329726	332896	444279	321039	349569	337119	385527	381677	408804	611332	557865	491548	357008
P12268	237607	179089	264216	245424	221600	314322	268848	257698	334724	253216	372903	312933	209612	315160	274574	258621	265924	217870	337613	286342	263789	291599	265218	327147	163099	208675	250651	245553	173453	171919	240468	227998	163314	126756	211894	190023	201858	236087	329384	245563	245478	241077	275926	305406	295426	447512	431888	419626	218775
P12270	109842	91112.6	139248	119466	97631.5	138223	118500	116182	136334	107086	161745	156453	86895.4	118075	108848	104944	101686	93935.7	124068	116280	104072	112848	105934	132906	77380.2	99233.4	117422	120888	84587.2	91344.8	120583	115007	74905.1	73851	105639	108306	70518.6	85759.4	121073	88441.7	76851.4	90053.1	103194	96067.8	106520	145101	150765	141756	73505
P12277	NA	49459.5	76328.4	NA	NA	NA	NA	NA	NA	NA	NA	NA	NA	74750.5	NA	NA	NA	69603.9	91677.8	NA	66908.9	73530.3	NA	NA	NA	60185.5	80160.4	NA	NA	68294.4	95690.5	48655.4	45307	NA	NA	NA	130112	97188.1	132047	85099.9	100505	127440	66699.4	189012	130738	175439	173609	164408	162345
P12318	82546.9	55543.8	NA	87302.5	80637.2	106299	NA	NA	83059.2	NA	103648	NA	77042.1	123445	124523	106853	131930	NA	125809	NA	NA	79084.8	116396	107942	51775.1	66710.8	87650.8	83758.8	60671.4	59818.5	92349	84937.4	65012.7	58327.8	82686.5	NA	57258.4	54519.3	66491.4	47942.2	43211.7	70654.2	78800.6	66160.6	69683.3	105685	101086	72431.1	56603.2
P12694	89341	77636.3	136207	96535.2	88684	120547	105765	109206	124013	105725	152213	141007	96978.6	128249	116417	101754	112762	93953.7	128737	121062	112256	119361	112170	131252	61213.3	84343.8	98089.8	97605.3	76938.7	88354.5	107467	102105	81005.1	74705.8	103591	107593	46305.9	55585.5	81505.3	50104.9	51914.9	55747.4	64226.4	63087.5	69280.9	102321	92119.6	97078.7	67065
P12724	153187	169400	257336	128756	157452	168101	157876	187131	132850	166663	178258	189774	149927	138046	132021	129717	142704	173148	165893	174125	172695	169503	136039	173635	105797	126497	151934	133236	153006	168842	185609	185932	246161	181774	225780	231002	116916	127212	158606	107508	134420	148885	145705	119936	149499	244177	175831	127226	139969
P12814	185765	135650	193239	187246	162629	218796	162309	158899	209385	150283	264619	225338	104314	173194	147040	138228	146729	113984	184070	134342	125005	139395	124179	185070	131004	161957	190754	184981	143201	129798	192656	186415	128349	107701	168225	150034	140375	179198	258335	176265	172571	201133	212368	216720	207659	319314	283009	250915	167744
P12931	NA	64508.1	NA	54566.9	NA	77691.7	NA	NA	NA	NA	117282	NA	NA	70730.2	66709.6	57646.5	68240.4	114405	75334.2	NA	NA	92321	NA	92546.3	NA	35752.2	NA	75885	67624.8	101864	48043.2	53982.1	57367	93363	49842.9	NA	96063.3	82613	106296	56582.6	102314	103038	97673.2	96407.1	103195	164672	121192	102756	58329.9
P12955	81182.5	75630.3	111311	87827.2	81561.8	111431	109295	98388.6	99033.2	79935.4	123072	129350	96614	132452	102825	100982	117881	108273	123809	123272	104005	119584	101827	124560	54689.3	76900	88435.2	88097.6	72396	81116.9	99451.4	90235.1	70851.8	67867.9	95250.1	108889	59172.4	69421.3	111595	65152.9	71030.8	78589	83942.3	80553.4	88534.9	146081	118981	105759	112460
P12956	304306	237175	361963	319021	269925	383710	335878	325792	389337	312524	487291	432394	238001	342366	301879	300327	301910	263138	358870	319222	299824	324970	291030	391503	206908	257950	320546	314093	241386	252890	321281	316018	245300	196043	304109	305420	221667	270183	394034	266316	268094	286280	310349	326759	337300	503541	491654	474593	275706
P13010	269886	208608	318148	292684	243224	357259	277422	284981	345903	260878	420784	366804	205972	316434	279944	265561	278874	214303	320484	270041	255516	281595	234970	351648	192129	247763	289770	283697	216372	206790	291044	286511	191068	153806	252352	221687	217294	263110	381047	267396	251554	264135	314298	315637	339153	494055	470550	435245	269106
P13051	69538.1	67927.2	NA	85240.3	59885.8	97771.2	97064.4	98311.7	81460.1	84637.3	173875	NA	57355.7	53469.7	53749.4	55246.8	NA	53117.7	70908.7	NA	93098.1	91411.6	84913.9	78181.8	42060.3	68123.8	82209.4	92379.6	NA	45181.1	42049.5	39738.4	23158	31625.8	40107.1	NA	39344.9	22729.4	36297.9	77254.8	71673.2	68321.1	109209	79480.8	104307	128892	186516	161573	52649
P13073	421551	260569	427394	446790	407806	586533	327685	335367	526980	317397	599494	389960	278992	441929	408469	396329	414507	280504	505082	363792	296863	354315	294201	525365	306529	359895	436126	429059	362237	306250	441239	483277	407768	268263	476122	361600	325875	326120	441243	307226	358064	366639	405732	387934	414476	604325	532053	505203	336027
P13284	NA	18212.5	NA	10201.5	11542.5	15810.8	15841.9	NA	8150.54	12937	17769.6	NA	76210.3	34730.5	26475.5	23320.4	25334.6	53178.9	36956.6	NA	12326.2	16679.1	25945.4	26760.4	5985.19	9580.12	11769.7	12845	12726.3	25632.6	14372.4	13284.6	10194.4	27222.2	17493.8	NA	14682.6	32551	34404.4	10843.3	44417.5	23672.2	20724.8	24367.5	24017.8	45421.4	45934.9	27458.4	30576.9
P13473	253349	238489	232663	251548	292979	324121	326827	270152	304126	307316	441482	317777	235934	294771	217791	249979	293065	302694	334329	327842	260463	287939	342757	321188	198012	197022	210863	257916	295708	272244	294581	325178	371712	241720	436874	416610	233819	321540	430681	265289	348835	351419	316101	303734	381885	747925	528529	427076	462759
P13489	282218	196110	221428	212964	287327	271100	204475	206352	224082	146715	282563	212119	203415	329780	227677	208716	303472	181167	297596	240861	193566	196264	182529	185963	211814	225867	228567	196343	249340	151714	265229	243195	235287	130951	223631	165396	358008	345766	416599	313013	378710	354539	393424	382117	291914	535274	374139	344246	366951
P13498	232519	151921	295776	277086	165148	223624	200520	285089	187366	132232	236886	145848	124048	234598	258092	198181	142091	114812	222657	149833	157848	201773	234949	295818	162087	203920	278580	257619	83938.8	100226	171260	157561	95999	73300.9	171746	86835.9	196631	184947	218102	185676	139496	167582	225304	217011	241342	285160	326212	290487	144007
P13591	18695.1	14908.6	NA	19392.2	14211.7	21190.3	23382.6	9409.68	30021.3	21290.4	31445.8	14787.9	NA	NA	NA	NA	NA	NA	NA	NA	NA	NA	NA	NA	9317.92	11323.6	17627.6	19307.2	12194.6	14267.7	15552.1	10586.5	6898.04	NA	NA	NA	NA	NA	NA	NA	NA	NA	NA	NA	NA	NA	13887.7	NA	NA
P13598	11581.1	62330.6	NA	53235.8	35689.4	67721.5	57041.3	80775.7	57110.6	37110.2	68092.2	52183	30757.5	60613.5	75003.6	48261.8	42529.5	NA	71293.2	38719	54722.1	43550.2	NA	98492.5	18343.1	39806.4	49842.3	51231.7	30364.7	NA	36801.1	36776.1	NA	NA	32203	NA	NA	NA	NA	NA	NA	NA	NA	NA	NA	NA	NA	NA	NA
P13612	68032.2	50530.4	76872.2	68156.1	61415.4	95953.7	89776.9	93019.8	102808	74306.1	118920	113684	29070.4	45751.2	29744.2	33065.8	43214.6	31171.8	53554.9	58550.7	51651.3	55592.4	53367.2	60065.1	48425.4	62183	64118.1	68464.5	38653.8	35177.5	47005.7	44333.9	31252.7	27037.8	30845.4	40678.9	91179.5	99317.7	146670	100738	101154	114338	122920	119588	128764	204047	181596	173505	111451
P13637	NA	NA	NA	NA	NA	NA	NA	NA	NA	NA	NA	NA	NA	164245	NA	NA	NA	NA	NA	NA	NA	NA	NA	NA	NA	NA	NA	NA	NA	NA	NA	NA	NA	NA	NA	NA	82745.1	78759.9	148502	69836.1	63775.2	101335	105411	122275	113929	264643	113700	132358	64560.3
P13639	521626	402966	545882	526790	480740	682184	487913	475883	673851	350325	719312	493203	368605	579895	493131	463104	509555	381302	596912	432603	435396	451584	381993	589156	373117	476326	561026	519186	359411	310785	479722	441918	300785	213105	403155	299891	377515	406374	584215	447273	417667	473836	536656	531400	572542	743858	742809	695742	382047
P13667	134543	114693	168924	142062	126679	176367	151852	151715	164868	125608	184257	170938	121114	178839	156426	143027	150640	136724	174042	159161	148385	160204	159617	188292	99725.9	120882	145825	140321	105549	107280	139954	132139	105980	83392.8	136328	125210	110278	136313	194021	128020	113278	137176	149118	141959	173723	246597	220381	204430	155930
P13674	181300	160526	228193	185319	115480	181518	140550	156278	151093	158512	169002	182132	81129.1	124624	137713	109760	100022	100596	130685	117069	100304	121061	104653	150933	134344	160946	191098	183509	101482	112549	138089	134055	85117.7	83327.4	111000	118353	117934	191883	202266	183939	100012	145604	135910	165480	126383	188825	185716	180500	87201.7
P13693	220877	137406	189699	249174	219103	320067	190708	243620	272010	183145	312728	196977	134578	202708	214997	205882	184307	108780	264920	233178	162586	141416	208042	232147	156119	189583	242616	240819	158236	102550	242317	214125	143658	107014	213154	193857	105853	144126	220724	151677	149028	183300	201337	194400	196864	277974	266904	254837	134895
P13716	115519	93014.3	122565	111261	113406	141033	114454	106570	120266	108913	154786	136728	120856	192627	152292	156437	166865	152665	184633	158836	130645	150330	163943	188073	79030.7	99097.5	117434	115153	107700	103771	150600	154255	118660	137765	160976	161743	70428.2	81195.2	110845	81321.6	77815.9	84700.3	89369.7	101552	85248.4	147285	127412	119739	122622
P13727	475571	193168	166855	193979	412972	289426	179814	179514	206954	108311	189929	102656	NA	NA	NA	NA	112435	NA	74662.3	NA	NA	NA	NA	219786	312469	279882	193203	178541	368594	108970	230616	177390	324371	69643.7	154677	91669	276961	137303	170614	72386	143720	137992	121582	118575	339275	363540	183922	74180.3	44661.6
P13747	10741.4	NA	NA	26825	11678	42915.9	NA	NA	28468.7	NA	36150.9	NA	NA	27468.4	24043.6	10406.4	22525.9	NA	36227.2	NA	NA	NA	NA	26485.6	12360.1	14347.1	17059.5	22149	NA	11926.4	20670.9	22597.1	19226	NA	24774.2	NA	18172.6	18328.5	26160.7	16659.9	17493.5	20098.2	23602.8	18526.8	24832.2	33695.8	41910.2	29749.2	15790.8
P13796	771841	490064	811416	789006	648916	851850	729672	675648	768209	555652	990082	702245	503866	858012	787630	730365	726301	532508	939545	628511	552432	631876	503485	817775	528968	598521	781677	783874	575380	470258	803370	759716	475664	316248	685856	566076	298845	386402	559861	412874	354431	400874	462229	456704	417820	614007	615731	554755	341414
P13798	155150	125562	185246	163553	138752	197509	163485	180679	193046	146712	227660	230518	128500	188524	161118	153170	158036	128648	192141	166458	142674	161371	158554	206704	109176	137349	164718	165598	116919	121582	165307	163479	101820	99880.5	144042	158112	143812	166315	234124	164937	175033	180893	200607	199323	223631	310718	296629	262446	203782
P13804	201286	141008	213172	216120	211024	259709	176084	178078	253882	174694	311212	239535	183148	319805	267918	265610	287432	203259	326363	225756	191141	228694	167960	308385	158391	193800	223239	222069	214688	165995	276180	259175	278928	147800	295050	202844	189937	170113	212845	153869	191071	184353	180577	188947	189140	284629	244460	217350	254412
P13807	144031	106443	142276	140875	117137	155046	124350	111512	114800	106978	158994	141745	86749.8	128157	135893	123609	111797	98853.9	159682	104349	100113	116661	106886	143734	95649.6	113725	133737	138208	106892	103419	146982	131957	110388	80301.3	126148	108273	65561.2	107086	155555	105462	109776	129802	123052	127955	122261	219217	174597	164555	116506
P13861	94982.5	74569.6	136278	99703.4	86681.4	119678	105141	101999	111046	84898.6	155046	143614	91382.1	130243	112061	100769	116510	107066	133891	138938	108847	107530	106744	125931	64316	78284.9	98003.4	95648.2	77989.1	92715.6	107609	105874	88271.4	77271.4	121141	126047	59037.9	62984.7	97630.4	59831.8	64858.5	78829.3	78430.4	77099.8	77046.8	133431	114190	103177	101479
P13929	339807	260562	649201	303975	148291	307710	366385	585793	187764	NA	404917	393832	191788	294116	359520	265261	202455	886092	527372	464126	417653	306360	202036	411866	134626	274187	446436	304183	172892	248519	305319	268548	150531	NA	386152	416520	242463	210707	311004	274750	188106	312660	167622	213259	258590	230438	299774	228238	143145
P13984	72537.9	65716	110592	83303.7	69138.7	104653	90679.7	74307.4	93004.5	76585.7	116508	121249	62843.1	87561.2	78691.1	76231.4	78421.3	79226.1	90908.2	95798.2	77235.6	93791.8	72909.2	89703.8	48182.1	66116.4	80663	80640.4	56249.4	60436.9	81961	69344.5	53400.1	51861.6	71989	72778.1	43890.1	52667.2	89973.7	56565.6	55707.5	65345.3	73374.6	72177.1	72756.5	105157	106517	96764.8	55327.9
P13995	152913	130361	212252	172101	129303	230585	206223	194996	338266	252774	391422	273432	123376	173584	167308	156637	139210	146267	203129	193583	215201	233827	181771	264624	100622	138999	171390	170575	85719.9	88876.1	128859	113706	72671	66056.1	100546	99477.3	84696	88645.7	134747	96823.7	107973	110341	114715	123564	127227	195129	177097	189871	87149.7
P14174	918975	652443	906056	1.2582e+06	1.18456e+06	1.50907e+06	1.05368e+06	642971	972280	447122	1.57888e+06	579145	437754	1.0782e+06	1.11574e+06	1.04267e+06	817979	389530	1.12568e+06	456055	442599	535375	602256	947990	813374	933270	1137753	1321413	967056	572670	1.32847e+06	1.19767e+06	681315	230750	1.00206e+06	399094	952926	901333	1.33154e+06	1.07338e+06	800204	1.05634e+06	942520	1.36881e+06	1.00756e+06	1.88099e+06	1.56929e+06	1.69273e+06	884023
P14209	32094.9	34611.5	50678.9	32507.8	28572.7	44601.9	42681.7	41832.4	42837.6	48510.8	48531.4	63472	28973.9	32339.8	26817.3	28360.2	32343.5	33899	33208.9	43109.5	31083.2	33846	40742.1	36690.1	21846	28458.8	31745.5	29884.6	25349.5	34727.8	30563.1	30494.6	18666.7	20149.5	25140.6	29207.3	30681.3	37978.9	46640.5	31501.5	34331.1	39067.7	38917.2	38547	39829.7	60036	55764.4	44767.6	37303.3
P14314	308678	214422	254052	285587	282238	362958	241694	216462	348211	197150	385403	246115	211958	347126	279420	263796	308539	202987	331407	228771	212463	235556	227153	318890	211819	250701	290599	290099	237267	199187	313214	308896	251861	146924	288031	194152	209977	240580	329437	248802	220445	258254	286335	283067	274751	413001	376719	342939	254509
P14317	105653	85278.8	139208	127090	104616	150163	105043	114317	126537	95468.8	165170	154623	110017	182650	176319	157511	153230	120396	193127	168209	125565	142703	120260	179835	78371.4	101425	133674	126944	82676	93129.6	132152	123943	68535.9	55538.2	112630	93687.8	132198	153050	229170	150036	138667	170252	198647	184425	184041	272202	250379	223423	152068
P14324	307676	189521	263641	253655	215248	247357	192455	163228	213955	177138	302926	212615	133488	214587	195892	181180	188981	140705	206031	161195	114093	154112	144999	219239	217795	226344	276496	260975	221249	176606	251759	241585	158651	113213	188542	144083	246236	306512	335033	269260	228172	249762	266280	259805	228290	335440	325137	285926	210792
P14373	100062	104663	126861	109273	80255.9	151610	118924	145769	123250	95249.8	197253	158041	92213.9	107392	126762	133805	81248.1	119938	139712	176067	107798	79168.3	92876.1	145417	77185.9	65539.3	109749	99494.1	29007.9	88887.2	68991.1	90093.2	80697.1	NA	85611.4	122204	55271.4	104358	112342	111077	85431.8	84420.3	92380.3	113881	94678.7	159726	160022	125901	75643.9
P14384	46266.1	48410.3	81169.2	68759.8	60748.8	83995.3	82370.2	77336.4	59981.8	54674.9	80458.4	69831.2	78682	109810	98387.1	92189.3	96562.7	101074	147785	121063	84738.8	98017.8	103434	121227	34259.6	45806	63091.7	67130.3	49582.3	71278.8	85918.6	80824	60974.8	65606.8	84573.4	92982.4	20502.9	18316.3	37390.5	23149.5	20219.9	28638	29892.6	30000.2	30611.4	52957.8	45491.1	41336.8	34996.2
P14406	1.60642e+06	1.15734e+06	1.64033e+06	1805165	1.52791e+06	1.83855e+06	1.38457e+06	1.42101e+06	2.06534e+06	1.64099e+06	2.00959e+06	1.54853e+06	1.02166e+06	1.44612e+06	1.58886e+06	1.47726e+06	1.37692e+06	1.06438e+06	1.84819e+06	1.20985e+06	1.22451e+06	1.24669e+06	1.08026e+06	1.64003e+06	1.24059e+06	1.23998e+06	1.61051e+06	1.72408e+06	1556543	1.06175e+06	1918637	1.86636e+06	1.60684e+06	1.12662e+06	2.06563e+06	1.5842e+06	1.18223e+06	1.07143e+06	1.19003e+06	940499	1226621	1.04366e+06	1.15026e+06	1.12791e+06	1.01374e+06	1.58041e+06	1291995	1.26231e+06	1111339
P14550	142628	109790	164635	139519	132306	161755	155073	158216	136276	120211	207471	219711	108041	173577	147020	143440	158687	140230	180899	166256	128854	168207	142454	178996	100121	117087	136045	138486	123091	109309	152583	145481	136784	104465	141957	148038	95964.8	102140	141132	98312.1	102005	111884	122570	117955	107840	172155	152726	135651	141384
P14598	131714	111671	145709	136144	136992	135225	102048	106911	128393	110776	137302	127877	120567	224604	173073	152191	173569	147767	171489	148753	141562	152682	100277	154150	94166.2	120827	137540	133219	116770	87475.2	110942	113729	114111	72800.5	94442.2	103487	54493.8	67187.8	76790.6	50334	53161.2	63994.6	53575.7	75901.8	53705.3	82012.3	69844.3	66473	40497.3
P14618	525052	334990	486027	543069	473962	614380	496228	436264	477367	328354	711238	479104	305592	508576	504734	455060	469651	319498	644571	417807	337243	413228	332057	584592	377501	452033	519003	546408	430234	353763	573724	553282	373343	199388	498871	363078	284477	385096	519251	388431	359183	441383	442209	456394	398215	673624	574044	483347	360874
P14621	81005.9	67197	NA	96041	70536.9	96966.8	145489	NA	73279.1	74836.8	114268	134065	84516.5	112247	91337.5	101696	94494.8	75822.3	121462	96661.8	83058.9	93333.2	73853	111575	43884.3	67051.9	79668	75796.8	67124.3	75031.4	87357.6	86681.5	70963.7	63014.7	103110	58582.9	72357.8	92732	111785	60612	77439.6	83011.7	95022.4	90046.6	74156.5	165414	105919	100142	126036
P14625	362004	283147	395628	373523	333290	462290	401263	373109	402234	304714	444336	389030	323495	479658	427897	390742	398660	326685	495220	397740	381654	413867	387271	488806	261399	314953	389471	370603	277868	275671	383010	370069	286081	226274	383879	340134	203531	240212	336576	242131	227750	244941	279531	286494	292805	440791	406152	382123	287142
P14635	77481.8	71435.1	83341.2	92190	71292.1	141365	134579	125683	101499	71820.5	112934	68683.6	45489.6	NA	NA	60212.4	NA	NA	96292.9	62085	83953.2	72502.3	63260.6	97804.9	46035.1	56612.8	72046.9	94907.6	NA	NA	NA	NA	NA	NA	NA	NA	45380.3	52175.4	115699	60521.6	50216.1	92620.4	91982.5	78972.3	73196.6	32376.5	80013.5	139972	50095.8
P14649	505789	436092	483845	550997	505374	601777	458457	462112	453293	437488	588187	563381	544259	629013	645344	532102	581609	508602	710537	579614	601579	541993	520750	585936	383323	425559	547825	461013	396540	459892	550094	512792	399893	366367	582805	405109	691744	540947	722378	514060	444365	510408	615974	583471	581477	867834	680065	599356	423565
P14678	192563	162820	289633	174758	177754	221763	222140	238153	227799	228005	251732	346529	153760	187359	180112	163185	174742	173856	209207	242519	194354	207387	194770	211531	132465	159732	196486	170152	162539	163618	185581	174045	148815	184848	176717	201470	160616	184255	230909	172513	163481	177830	207410	193405	172304	274503	266698	238621	160450
P14735	131849	109204	161784	141247	117746	176351	139757	152711	173784	130683	212617	178466	113104	157958	137893	140631	140930	126437	167392	149857	132304	140597	129391	177027	94295.1	127662	146831	146455	98637.7	111490	133614	136210	96641.9	83533.8	121256	123663	62282	78587.4	114596	81097.1	76498.7	83640.7	92846.1	95821.7	101592	146685	138794	140094	84586.3
P14854	173903	77004.9	97376.8	157440	214386	201774	69088.1	76846.5	188166	62205.4	147918	54961.9	82443.3	205526	159372	132214	195924	58163.3	172912	64003.9	78442	48246	37958.5	121279	134868	185813	153091	157590	157799	76215.6	185542	186763	136902	40760.6	144396	46898.3	162068	133319	158675	158812	150102	132717	187972	182021	146155	212904	188725	153276	169851
P14859	98114.3	108664	142121	108560	102922	125277	137442	173571	114340	125126	129773	202766	81802.1	130513	93955.6	104480	111492	116691	141684	208828	134734	120826	146993	141843	77204.7	91145.3	102760	92170	80529.9	106854	102250	105825	82527.5	84906.1	89407.1	181157	76895.8	89405.3	126811	86152.9	86936.3	92334.8	99231.2	108604	108000	155467	147499	134746	91808.4
P14866	197541	109805	152361	191413	180985	236590	147045	141825	218653	113262	272805	101959	131513	220168	180855	177602	203105	107891	214216	118373	125919	131695	113936	225992	142648	174197	186096	178815	166703	103917	209660	189153	161632	81680	177468	105625	175548	199100	240506	186283	189422	201969	220561	198556	218437	294089	275058	232053	177418
P14868	258820	199242	311193	260420	225951	299070	241591	235671	298512	241030	354703	329601	186097	270838	250256	231095	239611	195706	283989	261093	206967	239080	221031	293353	179651	222958	267258	260055	194134	192417	262046	253061	191725	156077	241464	224151	175603	198028	276811	200489	187252	204892	223438	232378	221215	333467	312344	312571	189655
P14927	250510	234534	336919	271128	244499	314611	281870	345857	331911	284299	415873	433253	274520	341646	312022	292445	321006	287526	357766	463272	312552	324941	336068	372476	184721	215941	257663	262466	233318	245783	280981	301815	294644	241764	349014	477196	212414	179955	255609	164645	201446	189036	203429	196732	220882	335972	301680	279550	253310
P15104	86176.3	84558.7	90344.4	112173	55911.5	78419.5	64685.7	69831.4	51583.1	83383.7	102645	NA	119494	153441	128067	144599	104140	84012.2	112376	91248.5	47067.3	66228.4	58687.8	96459.1	64332.5	74057.3	98086.8	114126	70442.4	80667.1	92522.2	83146.2	58288.1	NA	73631.1	94405.6	92867.7	95777.5	194548	145940	73833.5	75108.5	74591.1	69765.1	123523	149910	146804	100166	114697
P15121	80599.1	68148.9	109704	98108.5	76519.7	109187	103721	82451.5	107825	95145	147900	138112	105940	169933	152015	143359	137612	114009	159433	157938	104887	145047	123845	163196	57011.3	78150.5	98696.3	96952.6	71750.9	79369.7	108247	104666	71253	65422.9	99181.5	100178	114917	156864	234622	164136	123337	158487	182241	188803	169266	300634	275376	266157	173409
P15144	35286.2	35726.6	30129.4	27367.6	37436.7	40836.9	50074.2	42611.8	25336.1	NA	44929.7	19712.2	NA	22689.1	NA	NA	21872.2	NA	26704.3	NA	NA	NA	NA	NA	24052.3	29137	25382.2	26022.8	28046.4	41617.2	28762.2	27695.9	28105.9	39671.1	26790.3	44645.8	48537.5	38971.4	76308.1	38522.9	68498	66350.2	61020.9	41986.6	53401.1	103390	56738.2	30509.3	32286.2
P15153	630149	386651	642519	546839	591235	666260	502280	405337	586015	328095	799040	563849	343274	699927	566122	484952	586158	325189	674947	438468	369458	414770	281613	484122	403144	500281	607218	486377	466528	366585	593821	510187	455081	224500	500461	325163	706544	661887	800883	607329	682220	653692	735793	709330	543520	814874	711476	681712	588686
P15170	126631	110106	170289	148759	123511	189070	162496	166112	185401	130798	209834	181977	98935.4	147803	129508	130711	135131	129085	159131	142924	106987	140299	140417	169210	87710.4	121557	143682	146884	94235.6	97250.5	133590	130237	80035.7	74533.6	114172	118125	105152	113242	176278	119176	118465	135219	144409	146097	150196	225555	214378	210664	109364
P15289	63716.1	49883.2	138632	59783	49597.9	58070.7	63260.8	57852.7	59390.9	139295	78562.6	104823	71215.4	89908.2	67250.8	63643.8	67126.8	105333	84655.9	88679.5	84316.2	90848.2	60311.3	92466.2	37304.9	47199.6	49761.8	55994.9	49137.5	66552.2	64586.4	72314.5	65111.9	64538.6	67565.3	107951	58264.4	59665.4	92680.9	56265	80262.6	59998.8	72577.9	74936.6	87181.9	149056	109927	90817.6	131060
P15309	41770	46656.8	78534.7	72169.8	57831.1	74243.8	67868.9	64455.6	56580.8	45555.6	49702.4	82135.3	136128	333207	253121	266485	272427	192885	325122	233832	180020	227689	180622	334772	33798.2	45392.4	59348.6	65684.1	70276.8	60897.9	94306	95415	84814	61925	105639	113204	32265.1	45340.4	52012.1	38131.5	28214.1	49136.5	32886.8	48150.8	36800.3	82971.5	57389.1	61643.4	63272.2
P15311	97144.7	65491.2	97330.2	113809	93560.7	128750	75966.7	70356.3	127278	78657	166777	90863.5	62162.5	108399	107683	95919.2	94128.2	56446.9	119901	81858.9	54252.6	77286.7	89042	125471	71688.2	92448.4	117201	114310	83441.8	71918	111543	106206	62631.4	48219.8	91209	41509.7	50819.5	57316.3	76767.6	57370.2	54046.1	57892.8	65656.4	67149.1	72663.3	93443.4	101017	90597.7	43177.2
P15336	23760.4	17570.7	13877.9	27907.8	24867	40674.9	33493.4	22498.4	31982	26711.3	53479.6	18296.2	20587.6	38648.2	28120.8	28030.5	35473.3	18149.8	36588.6	19084.1	23529.5	29031.4	19693.8	40246.2	12068.5	19848.6	24426.5	32418.9	15580.5	19520.1	28982.5	29542.7	8168.81	8869.26	9888.46	7443.49	19134.8	27507.2	44469.6	24285.9	22355	33244.1	28123.6	33643.3	43434.4	65723.4	57083.2	53953.4	24091.5
P15374	126446	102505	123694	141202	126131	176138	139577	132012	161054	109228	219253	119446	78429.1	153603	141540	119566	137611	106884	158543	125439	106953	114695	121796	148581	98148.7	112281	151018	140585	109635	93460.4	151280	134852	103511	75366	140146	109558	58942.7	76156	103795	74372.7	68321.7	84352.9	90868.3	91660.4	87775.1	128527	122151	134389	75128.9
P15408	56124	61212.8	73748.6	66302.8	22536.1	84210.1	66379.5	54149.2	80639.7	71808.9	114376	101397	40092.7	65082.1	52319.8	48685.7	42738.4	37867.1	52123.6	59924.4	38814.3	55795.7	50059	56496.8	44867	49262.4	52333.5	60737.6	17832.1	28426.5	36017	36369.4	10220.3	NA	17125.1	17591.3	90808.7	115624	216775	110467	89622.5	116722	118341	97361.1	131530	172765	184121	154588	81174.3
P15498	112762	79691.7	136475	114336	104889	128978	111155	107503	141048	98726.8	172225	140305	87166.3	149471	143217	131403	137227	102815	163019	135069	104344	122564	122987	163754	76975	100157	118541	115970	92335.3	83572.6	127049	123232	96615	76826.2	123143	107388	126208	141684	198677	141615	146373	147944	164356	173378	157640	240554	234064	206967	151696
P15531	711232	342924	655022	668347	522918	813208	512415	402368	781114	480426	1.00801e+06	559078	405682	654259	654920	603119	572912	403359	753367	476410	391554	495368	491701	786295	455056	514800	725330	676942	397506	371619	678178	608743	320413	233454	549400	280206	439931	518976	807537	582381	475221	529906	691437	607755	684931	1.07089e+06	1.08506e+06	984687	592562
P15559	36910.6	NA	NA	62970.9	37032.6	66648.7	NA	136181	38472.8	106476	NA	NA	297980	21298.4	22421.2	45609.7	35414.2	NA	51442	75826	NA	26483	NA	54452.1	30167	21258.1	NA	51772.8	34966.1	77245.5	38831.3	60937.1	31084.6	NA	68164.1	NA	142897	132932	301291	157325	241168	353553	333990	187946	219990	419662	284512	148221	70318.8
P15586	157769	147145	204609	141380	151203	194259	135513	176911	154811	136955	185181	244244	99027.2	182547	148137	140793	187523	162430	186606	221032	147079	156655	170129	191844	118635	138387	142724	129901	160576	142080	178728	170734	199518	182566	209813	273489	108855	124129	144999	103902	129180	131232	125366	128913	122255	216592	164267	146142	187479
P15735	101032	98056.4	139534	94627.9	103827	128510	86252.5	94896.6	119004	97975.8	143874	168758	94066.8	136724	119096	106045	136121	106286	152980	99909.3	110693	118207	102798	165730	60919.4	105313	91535.2	96404.8	85072.3	84866.4	99459.3	94745	97272.4	59223.4	99841.3	103740	NA	40580.4	85039.2	61675.1	65370.8	53929	38547.7	72995.7	83235.9	95547.1	86193.2	112934	55924.3
P15814	NA	NA	NA	24421.6	NA	38932.1	NA	NA	42381.3	NA	NA	NA	NA	NA	NA	NA	NA	NA	NA	NA	NA	NA	NA	NA	NA	21433.3	25926.8	29188.7	13160.7	NA	31280.9	27752.7	10825	NA	NA	NA	27221.5	27940.9	46065.6	38652.8	33784.8	41559.8	60185	28935	95589.3	85036.4	62144	36499.2	50469.4
P15848	75911.5	55238.2	73293.4	88762.2	84085.7	110847	81097.3	72646.4	93835.9	61535.8	129731	79341.2	65542.4	110314	101013	95368.5	95208.1	77985.6	123244	97074.5	67441	85070.8	85827	121828	56169	58430.2	82000.6	90227.9	75810.2	56044.8	104830	102929	85999.6	70564	109563	70861.8	63162.6	73675.2	95410.8	64112.8	74801.4	71569.9	75731	70541.4	90146.5	149324	111203	95556.4	91099.8
P15880	294392	208574	366131	309489	280123	399900	307859	314432	375490	257309	398996	350814	226834	363086	297754	279984	314394	237038	380360	347315	271823	300798	237790	368083	209245	267614	293324	307639	220938	186399	301185	276150	214414	137364	264279	239946	206431	232097	312803	257178	226440	239878	259212	281943	301768	408924	396241	346011	215401
P15923	NA	NA	NA	15374.4	9381.48	21976.1	NA	NA	15133.4	NA	16342.3	NA	7228.77	18657.6	13624	6878.85	13140.7	NA	16912.5	NA	19995	22703.5	NA	21835.4	6956.32	11495.3	16010.3	11266.5	NA	NA	NA	NA	NA	NA	NA	NA	20369.3	17829.9	36486.1	24312.7	20521.1	19513.2	26257.2	26495.1	37119.3	54038.7	76720.3	61288.7	30839.9
P15927	119505	105301	161663	148402	118818	165019	154118	133648	141764	114262	162657	141490	111348	139725	129974	128343	112810	120915	144778	138230	124830	137795	120083	147225	85290.8	111137	135116	130371	106712	107761	142871	140261	102183	85871.2	130389	110242	98045.4	121753	154322	116114	100715	121003	134507	137908	137827	183336	175301	161166	96636.4
P16070	101798	82711.9	118899	87303.1	80314.3	107514	105016	94727.5	81883	76243.1	127458	126545	76183	116122	94141.9	84160.3	98237.7	98008.1	121794	126863	85347.2	105350	85027.1	106229	66972.3	81314.7	92532.9	87659.4	60293.7	64834.2	79807.8	75021.8	61129.8	53627.1	77802.2	77757.3	130852	147784	170667	118040	148768	166749	142905	130246	139643	201182	179474	145735	196050
P16083	104834	89961.9	170194	101444	91157.4	139665	140378	177878	111815	110180	152765	155329	123759	149916	133842	147695	153444	150042	173581	198398	134722	185666	144734	163807	72534.4	84890.5	118709	109394	89082	122264	120958	125474	89534.6	101520	124450	154214	114020	142856	183587	138917	141869	165335	181766	175142	147729	212106	195972	168813	148271
P16150	305933	250368	432845	320297	247964	340220	326494	359567	291763	284166	418115	509255	156121	222297	233036	199210	216103	205619	271653	317037	194939	232269	253434	266177	217403	279540	322275	317774	194888	215029	297341	280491	129004	175433	223342	228757	247941	259098	326685	258094	231246	276972	298692	270221	277832	401840	382528	292550	187896
P16152	384073	261760	353136	386082	323606	453062	362200	371402	388473	312004	571642	435561	249439	434246	389066	363047	377488	272308	452049	358373	311910	343116	323701	456124	253956	318795	372260	368125	290911	249990	405574	405412	313004	224815	390896	335527	104700	128752	175164	113189	149367	151795	142964	152495	158465	246420	220153	191260	159878
P16219	102275	112087	132754	109663	103388	140020	130271	145538	116893	117958	97338.2	197922	121539	158826	121518	130952	149152	160890	169431	196502	141822	188490	115082	148228	78067.4	101502	97444.2	100134	113306	127589	138793	133569	135686	154911	153242	192813	101192	110746	147518	109117	116432	116417	127898	132835	110786	202824	167851	153452	168154
P16220	142505	154484	196141	140783	129212	190828	176001	201856	159204	143136	175611	198471	138483	179593	130491	123381	149066	144246	139493	145363	174637	148649	149616	197976	83408.1	150407	139761	121613	108820	129121	123151	116594	88292.3	90368.9	112027	120857	115102	142718	186059	139441	122872	139366	149114	169394	193269	257021	200164	242590	127586
P16278	108766	87665.1	118162	114749	116986	141689	134120	123141	124047	108528	154287	150811	105940	156737	131486	129499	137953	132139	183538	133782	122270	128252	118442	164950	82688.6	84933.5	109205	117546	109514	98058.3	155593	135969	158590	112122	172395	157893	94957	111199	161777	105756	110593	120877	114473	122045	113300	226250	171908	138310	179435
P16284	87104.3	76751.2	101916	85272.8	105615	96458.1	90187.6	86250.3	72006.6	69966.9	98010.4	107028	69565.6	90355.4	76859.7	76016.6	109608	79976.2	107464	96087.9	80224.8	94228.2	88643.5	97862.5	60448.3	71157.1	83956.8	88253.1	104859	88080.8	106770	102393	103712	69389.1	97775.1	91219.9	58797.1	62381.8	71525.9	54266.7	59794.2	67924.1	66654.6	73272.4	55789.7	91621	77339	68851.9	39801.9
P16298	67669.7	60637.2	95943.3	77782.3	59969.3	89094.2	96940.2	82183.3	93342.6	72672.7	112408	92155.4	82150.5	98821.3	89369.4	87554.7	79751	86942.6	120818	97114.8	89416.1	89637.2	76934.4	102234	55444.4	71848.2	79524.7	87796.9	47717.5	60711	67031.7	70028.5	50275.7	52029.6	63663.2	113091	47953.9	59239.8	87737.7	53060.7	58597.5	69322.5	73288.3	75050.1	71822.3	106198	108819	103954	61105.6
P16333	87603.9	86669	160936	87180.1	72132.9	97354.3	125073	122076	91275.7	95475.5	114829	165269	80830.5	92796.4	88681.8	92028.9	83617.3	98175.9	106698	157196	85419.9	96635.5	102970	107616	59533.3	79967.3	91339.7	88181.2	61571.8	75653.9	86455	78676.3	62867.3	61977	77568.2	89690.4	57799.4	72989.6	106758	75381.3	70220.1	77820.5	90246.1	85326.9	88411.9	125958	115003	103733	77998.9
P16401	1.85287e+06	1511334	2.2579e+06	1.9121e+06	1.54582e+06	2317950	1.79872e+06	1.91817e+06	2.41376e+06	1.86169e+06	3.04489e+06	3.10016e+06	1551269	2.43726e+06	1.93617e+06	1.98057e+06	2.03043e+06	1.7725e+06	2.20127e+06	1.98029e+06	1.74632e+06	2.1639e+06	1.78418e+06	2446438	1.32054e+06	1.71109e+06	2.02468e+06	1.87443e+06	1.54652e+06	1.97821e+06	1.97046e+06	1.97478e+06	1.58444e+06	1457532	1.9774e+06	1848255	1132466	1.28312e+06	1.8193e+06	1.21838e+06	1.0595e+06	1.26113e+06	1.28963e+06	1.28999e+06	1.58459e+06	1.85921e+06	2.29295e+06	2.09508e+06	860588
P16402	669622	640491	856764	827253	747744	1.0494e+06	783801	851986	1.23635e+06	936228	1380144	1.59952e+06	663491	1.03843e+06	879646	893284	824820	728624	957904	933563	772291	852940	776851	1.07477e+06	563910	691466	835458	816844	733979	637374	990220	986198	765952	536855	872735	835664	859209	903190	1.21713e+06	875858	687163	739390	878813	828250	1.11547e+06	1.24166e+06	1.5003e+06	1.42347e+06	613894
P16435	94888.1	93113.4	125193	108630	90542.7	122566	105854	113514	112226	104748	108447	140880	116321	169690	143950	136458	151153	142414	162793	135152	146069	149436	120434	163134	69565	88658.1	109800	102946	85967	104480	114502	113380	104382	94495	123488	130158	52018.6	59950.4	89515.8	61504.9	65618.1	74019.2	75692.5	85230	72129.7	115366	97520.5	97676.6	75095
P16455	83335.9	51443.4	NA	89349.8	68282.6	102789	58251.5	NA	98053.1	65575	114836	NA	34660	86928.8	50377.1	49626.8	66241.2	NA	61625.3	NA	59603	NA	NA	60368.4	43877.4	55975.1	57865.8	55521.4	54847.7	61410.7	64973.1	60207.8	55306.5	NA	57084.5	53969.3	61030.2	63347.1	102731	79011.8	77526.1	86648.1	85982.8	91139.6	83848.9	163382	112754	116664	74163.8
P16615	105860	105861	131304	115192	99443.9	133256	118178	125337	120933	109656	148181	139224	107699	145023	125439	115951	125027	115439	143219	140412	114911	134059	126974	142052	80858.4	95389	111079	109904	85346.4	86767.5	109179	106794	86014.3	80399.3	108990	103048	90524.8	98775	137074	89232.7	100847	107186	109399	106121	113665	175222	155103	135864	97673.1
P16671	80986.2	49814.1	174711	79465.6	57897.7	129632	120789	96791.7	74560.2	NA	169954	NA	152487	219213	177960	177471	168179	160633	221645	176328	158568	171431	154425	216815	35922.4	50903.9	NA	78987.8	81670	104093	151461	169287	112877	86128.2	147955	164929	141488	173322	246142	153317	160848	163085	150434	138140	180645	322954	250801	164497	235009
P16885	79562.1	73439	112058	84701	73320.2	102202	106321	101183	85988.2	87178.4	122557	114340	87573.2	132104	115442	109780	116424	113214	137387	124215	110651	121394	119372	133470	54457.8	69665	84280	84233.2	69174	80640.7	95316.6	96111.8	83788.7	79821.1	100282	117583	77317.8	91115.9	138277	88687.8	95901.6	108824	112029	115280	104267	189564	155472	137602	120389
P16930	157128	130807	184145	172334	150281	215303	176083	160278	184766	140392	258075	193646	134005	191575	183523	169662	180713	140652	210611	175406	148083	164586	159758	195151	107936	148650	177201	172549	132478	133902	197075	180856	133733	120729	179450	163477	87226	99202.9	163519	104608	102863	123512	141297	139757	128050	230905	192862	172693	132721
P16949	711974	536767	827176	814155	580266	877244	776187	772028	819304	574650	1.14963e+06	898808	435732	644895	591126	609276	518350	363184	675914	647251	507396	570602	549233	819303	477597	650816	719669	799182	477581	520605	786981	756982	282694	230879	455124	415524	520669	753523	1.06853e+06	795505	562513	671477	888558	764799	1.06447e+06	1.25431e+06	1470113	1.19251e+06	615155
P16989	77664.9	71907.7	98104.8	100253	82147.4	148407	113812	82394.5	143127	84697.4	138471	93279.1	57472.1	74876.4	76486.2	71162.4	63425.3	58425.9	97716.7	75900.5	73786.8	83880.5	74975.6	94338.3	59673.6	72878.8	96808.5	102864	35473.8	41947.4	62558.1	55036.7	23209.8	18397.5	45750	37609.8	54960.4	68449	123646	83461.7	78468.9	88301.2	103568	94518.5	113297	164000	155778	153056	63774.8
P17026	58328.8	55199.6	132435	66306.4	58766.3	81899.9	77296.8	79029.6	93774.1	71840.8	92095.9	130798	55624.8	78065.6	60812	61424.1	59669.6	64035.8	70532.2	70663.9	68313	80370.2	50884.1	80682	40536.8	52814.2	59359.5	64285.3	50061	56130.1	55108.6	63026.5	50444.1	37112.5	58062.5	70513.7	47327.7	57941.8	73367.5	48480.8	58388.8	51600	55213.2	60761.1	61911.6	69771.6	81279.1	71222.8	37601.4
P17028	38385.4	NA	NA	64467.9	38722.2	62129.1	NA	NA	30468	NA	85873.4	NA	NA	23602.9	NA	NA	40798.1	NA	49238.6	NA	NA	NA	NA	83631.6	27183.9	24106.1	74947.4	59416.1	NA	NA	74651.4	NA	13728.7	NA	NA	NA	85338	40835.7	67787.2	46889.1	39560.5	45866.9	54034.1	53400	52431.8	105608	93652	95019.1	50704.2
P17029	20713.4	NA	NA	18474.8	12387.2	31345.3	NA	NA	25753.2	NA	31526.9	47657.3	21997.2	22424.4	26906.7	18147.7	23058.9	51516	24743.3	NA	10858.3	22400.5	NA	30847.4	7968.19	15721.2	24036	17022.4	10448	23984.4	22179.6	22528.6	15675.6	NA	25605.4	NA	15984.7	15803.5	27401.5	19169.4	12715.1	17041.8	28856.3	26124.9	22255.6	42621.6	40186.7	37013.8	21041.8
P17050	66233.1	44402.3	58014.2	71080.1	69028.9	92589.3	64088.9	74533.9	84999.1	58871.9	85546.8	50875.8	61375	106772	91178.4	93002.4	88582.6	72210.1	118127	66723.5	75488.3	71139.9	68013.1	94677	50699.7	50451.3	65513.9	69821.8	54795.8	46018.7	88202.9	75081.3	75298	48996.7	78313.6	48272.8	71230.4	97223.5	149150	90020.7	102084	102375	106921	113461	101838	190692	154930	146356	118725
P17096	369522	266324	418836	452743	353199	535612	404975	368657	507547	362921	617102	448235	274932	417459	383504	323451	397702	307285	456490	352431	255324	379252	332817	409210	276192	346967	413849	440298	313600	310719	422447	404037	331663	257881	416639	290274	275888	332061	402067	335234	300676	333000	364408	368505	399516	539908	549712	558647	286182
P17152	173200	125185	173551	138687	176162	203123	165717	130250	190543	154273	183936	192982	175956	228919	173687	185518	221218	175552	229324	167376	173417	179798	179565	205818	136641	163439	131436	134867	164925	141614	166710	180665	204327	114694	199308	217891	164494	179409	228835	172964	197190	194659	190641	210015	192585	267496	229881	233311	185846
P17174	243574	208966	272730	283179	203352	319319	262466	276337	356024	291379	496860	428553	213322	351634	284602	305380	277675	275356	361278	318219	262232	270100	263070	388704	170474	231454	267896	294946	199015	207947	300084	293309	179379	155787	237818	246660	50445.3	68307.7	106675	85897.7	72311.8	71550.2	90177.9	92101.7	97803.9	150269	138789	147913	87235.4
P17213	199941	101491	95420.9	98458.3	109086	129845	72222.1	NA	121584	83034.6	112917	105356	48686.8	86229.7	NA	49548.8	74634.4	NA	55842.4	NA	52332.9	NA	NA	80190.1	99316.2	96588.7	86161.7	83871.1	128213	81652.7	99684.6	79594.5	136756	72767.1	53704.8	NA	NA	NA	NA	NA	NA	NA	NA	NA	NA	NA	NA	NA	NA
P17252	68936.2	50888.1	90616.7	57945.6	53303.2	78155.5	90038.9	137279	66773.1	72286.7	83186.4	135940	48454.4	79198.7	71242	66562.8	95618.5	52040.6	85187.4	119401	67863.9	68261.7	83463.8	77514.8	42424.5	46763.4	63891.7	58897.5	51438	57173.5	54497.3	65457.5	55854.5	50866	64477.3	110792	56560.4	56743.4	75545.4	51670.9	60603.1	64233.7	62165.2	73541.4	61272.1	101823	91717.4	85563.2	56616.8
P17275	NA	NA	NA	72701.7	NA	NA	40138.3	NA	NA	NA	NA	NA	NA	NA	NA	NA	NA	NA	46313.2	46966	NA	NA	NA	NA	NA	NA	47033.5	48035.4	NA	NA	NA	NA	NA	26536.8	NA	41564	43805.1	20026.7	28315	18226.4	160330	24859.3	26393.3	16417.6	156128	225717	32698.5	20225.2	NA
P17480	131385	109586	151701	149317	124606	190346	145497	132436	181450	121554	202463	177814	109519	173196	144367	139325	151096	129662	163601	128252	127159	141490	128952	179029	91219.8	124764	143037	150835	107089	116550	142867	139439	101264	79407.4	117416	120276	100909	113322	175539	113344	105482	119099	132176	138875	139639	190600	194150	198960	111966
P17535	141003	134924	139925	183206	116214	152569	104031	117645	166381	123200	164799	129997	134552	187479	159662	169342	128890	108416	129975	108893	131222	118499	93525.9	161715	118553	134149	161447	152239	72534	72928.2	119398	91938.3	43320.8	102461	93286.9	132348	144995	164202	205755	169161	120456	139389	136526	142487	144915	164024	181091	181633	120187
P17544	78938.9	NA	NA	106118	73552.7	116777	143573	109436	117221	NA	125769	237990	66974	106568	92974.2	102346	104373	94127.8	110724	NA	110686	NA	NA	119402	50053.2	80602.6	100199	117402	62632.6	103535	87188.9	108655	58162.2	NA	63800.4	63305.1	45008.3	101663	90506.4	91011.2	28256.8	59487.1	102597	88551.5	90102.3	124996	130316	131252	88409.8
P17568	54714.2	40738.6	77173.6	50615.3	60328.9	62342.5	75160.4	43973.6	61713.8	35180.6	74678.7	73044.5	38465.7	71344.4	66624.9	63124.4	73084	62488.9	73992.2	70162.8	68446.7	75677.8	66154.5	64627.9	43235.2	41810.3	49666.5	55235	50239	43573.5	64480.4	68112.6	56295.3	31303.9	65893.8	42845.7	46951.7	42284	63974.9	42478	55851.4	45103.8	51173.6	47575.5	57902.8	81952	60962.8	62652.5	56717.5
P17612	51614.8	44975.6	46980.8	56615.1	48652	66222.9	51714.5	57253.3	69865.9	66897.8	80992.2	51441.1	56992.3	76241.1	77237.5	73481.4	67660.5	56418.9	92051	69620.6	54660.6	63924.2	62526.5	83883.8	41470	47351.7	42376.5	53875.2	47212.5	38233.4	64079.4	60071.8	54911.1	37121.2	64156.2	52578.7	30886.1	38641.7	59817.2	38680.5	40522.4	46055.1	50535.5	47840.6	44655.9	87689.6	72329.8	59970.8	71539.2
P17655	70698.1	67137.3	82591.8	65897.4	70758.3	86138.7	87078.4	84162.1	72783.3	63399.6	90843.7	109560	55178.8	75696	62341.2	58432.1	67249.5	62787	81183.1	105742	70068.7	65111	57790.9	71887.9	47554.3	60280.1	66128.1	63614.6	62262.6	82810.9	77327.6	76630.6	65023.5	64578.5	79660.9	84620.8	149282	149551	184649	122233	160619	158704	158405	153132	136125	226432	183801	142726	108019
P17676	25545.8	NA	23172	31402.6	28425.1	43842.7	27129.8	NA	54643.2	80414.2	64596.2	49292.5	23441.9	34450.5	33501.3	19632.2	32610.2	23589.9	41168.9	27195.3	25486.8	NA	NA	30776.4	15576	16182.5	26504.3	28058.3	16053.1	16820.8	24910.1	27195.8	24635.6	NA	30530.6	20033.5	61510.9	58429.5	86164.2	54645.2	48469.1	62255	80520.5	89096.7	57802.9	98241	92955.2	104332	35974.3
P17706	46525.5	56866.8	74565.6	44129.8	33803.3	54876.8	68143.9	61611.4	53076	63835.6	61888	109185	43545.9	54611.5	44352.9	41247.6	45831.2	54898.4	54156.6	53878.9	53790.7	70511.1	69041.5	53630.6	25100.1	36662.4	43588.2	42878.5	29195.9	64162.2	40418.2	36104.9	30381.6	44461.1	40663.9	69764.7	28808	32022	57842.5	35430.4	29208.1	35476.4	41639.6	41079.2	42465.5	71213.2	61231.9	58528	33085.6
[truncated: 4,423 more rows]
[truncated: 256 more columns]
