# Supplementary material for: Phosphorylation of SHP2 at Tyr62 Enables Acquired Resistance to SHP2 Allosteric Inhibitors in FLT3-ITD–Driven AML
Source: Oxford University Press journal article supplement (doi:10.1158/0008-5472.can-21-0548), 2022-03-21
Supplement: can-21-0548_table_s3_suppst3.xlsx [file can-21-0548_table_s3_suppst3.xlsx]

## Sheet: header description
Supplementary Table S3. Phosphoproteomics analysis of MV-4-11 and MOLM-13 treated with SHP099
Column header	description
EG.PrecursorId	ion ID (modified sequence followed by charge) - here we kept only the ions with highest sum of signal for a given modified sequence
MOLM13_DMSO_1h_R1	input data from Spectronaut: phospho-enriched
MOLM13_DMSO_1h_R2
MOLM13_DMSO_1h_R3
MOLM13_DMSO_1h_R4
MOLM13_DMSO_24h_R1
MOLM13_DMSO_24h_R2
MOLM13_DMSO_24h_R3
MOLM13_DMSO_24h_R4
MOLM13_DMSO_72h_R1
MOLM13_DMSO_72h_R2
MOLM13_DMSO_72h_R3
MOLM13_DMSO_72h_R4
MOLM13_Res_1h_R1
MOLM13_Res_1h_R2
MOLM13_Res_1h_R3
MOLM13_Res_1h_R4
MOLM13_Res_24h_R1
MOLM13_Res_24h_R2
MOLM13_Res_24h_R3
MOLM13_Res_24h_R4
MOLM13_Res_72h_R1
MOLM13_Res_72h_R2
MOLM13_Res_72h_R3
MOLM13_Res_72h_R4
MOLM13_S9_1h_R1
MOLM13_S9_1h_R2
MOLM13_S9_1h_R3
MOLM13_S9_1h_R4
MOLM13_S9_24h_R1
MOLM13_S9_24h_R2
MOLM13_S9_24h_R3
MOLM13_S9_24h_R4
MOLM13_S9_72h_R1
MOLM13_S9_72h_R2
MOLM13_S9_72h_R3
MOLM13_S9_72h_R4
MV411_DMSO_1h_R1
MV411_DMSO_1h_R2
MV411_DMSO_1h_R3
MV411_DMSO_1h_R4
MV411_DMSO_24h_R1
MV411_DMSO_24h_R2
MV411_DMSO_24h_R3
MV411_DMSO_24h_R4
MV411_DMSO_72h_R1
MV411_DMSO_72h_R2
MV411_DMSO_72h_R3
MV411_DMSO_72h_R4
MV411_Res_1h_R1
MV411_Res_1h_R2
MV411_Res_1h_R3
MV411_Res_1h_R4
MV411_Res_24h_R1
MV411_Res_24h_R2
MV411_Res_24h_R3
MV411_Res_24h_R4
MV411_Res_72h_R1
MV411_Res_72h_R2
MV411_Res_72h_R3
MV411_Res_72h_R4
MV411_S9_1h_R1
MV411_S9_1h_R2
MV411_S9_1h_R3
MV411_S9_1h_R4
MV411_S9_24h_R1
MV411_S9_24h_R2
MV411_S9_24h_R3
MV411_S9_24h_R4
MV411_S9_72h_R1
MV411_S9_72h_R2
MV411_S9_72h_R3
MV411_S9_72h_R4
MOLM13_DMSO_1h_R1_censored	Phospho-peptides: censored data (removed the lowest signal: cutoff 0.2%)
MOLM13_DMSO_1h_R2_censored
MOLM13_DMSO_1h_R3_censored
MOLM13_DMSO_1h_R4_censored
MOLM13_DMSO_24h_R1_censored
MOLM13_DMSO_24h_R2_censored
MOLM13_DMSO_24h_R3_censored
MOLM13_DMSO_24h_R4_censored
MOLM13_DMSO_72h_R1_censored
MOLM13_DMSO_72h_R2_censored
MOLM13_DMSO_72h_R3_censored
MOLM13_DMSO_72h_R4_censored
MOLM13_Res_1h_R1_censored
MOLM13_Res_1h_R2_censored
MOLM13_Res_1h_R3_censored
MOLM13_Res_1h_R4_censored
MOLM13_Res_24h_R1_censored
MOLM13_Res_24h_R2_censored
MOLM13_Res_24h_R3_censored
MOLM13_Res_24h_R4_censored
MOLM13_Res_72h_R1_censored
MOLM13_Res_72h_R2_censored
MOLM13_Res_72h_R3_censored
MOLM13_Res_72h_R4_censored
MOLM13_S9_1h_R1_censored
MOLM13_S9_1h_R2_censored
MOLM13_S9_1h_R3_censored
MOLM13_S9_1h_R4_censored
MOLM13_S9_24h_R1_censored
MOLM13_S9_24h_R2_censored
MOLM13_S9_24h_R3_censored
MOLM13_S9_24h_R4_censored
MOLM13_S9_72h_R1_censored
MOLM13_S9_72h_R2_censored
MOLM13_S9_72h_R3_censored
MOLM13_S9_72h_R4_censored
MV411_DMSO_1h_R1_censored
MV411_DMSO_1h_R2_censored
MV411_DMSO_1h_R3_censored
MV411_DMSO_1h_R4_censored
MV411_DMSO_24h_R1_censored
MV411_DMSO_24h_R2_censored
MV411_DMSO_24h_R3_censored
MV411_DMSO_24h_R4_censored
MV411_DMSO_72h_R1_censored
MV411_DMSO_72h_R2_censored
MV411_DMSO_72h_R3_censored
MV411_DMSO_72h_R4_censored
MV411_Res_1h_R1_censored
MV411_Res_1h_R2_censored
MV411_Res_1h_R3_censored
MV411_Res_1h_R4_censored
MV411_Res_24h_R1_censored
MV411_Res_24h_R2_censored
MV411_Res_24h_R3_censored
MV411_Res_24h_R4_censored
MV411_Res_72h_R1_censored
MV411_Res_72h_R2_censored
MV411_Res_72h_R3_censored
MV411_Res_72h_R4_censored
MV411_S9_1h_R1_censored
MV411_S9_1h_R2_censored
MV411_S9_1h_R3_censored
MV411_S9_1h_R4_censored
MV411_S9_24h_R1_censored
MV411_S9_24h_R2_censored
MV411_S9_24h_R3_censored
MV411_S9_24h_R4_censored
MV411_S9_72h_R1_censored
MV411_S9_72h_R2_censored
MV411_S9_72h_R3_censored
MV411_S9_72h_R4_censored
MOLM13_DMSO_1h_R1_censored_normalised	Phospho-peptides: log2-transformed data after normalisation using median subtraction
MOLM13_DMSO_1h_R2_censored_normalised
MOLM13_DMSO_1h_R3_censored_normalised
MOLM13_DMSO_1h_R4_censored_normalised
MOLM13_DMSO_24h_R1_censored_normalised
MOLM13_DMSO_24h_R2_censored_normalised
MOLM13_DMSO_24h_R3_censored_normalised
MOLM13_DMSO_24h_R4_censored_normalised
MOLM13_DMSO_72h_R1_censored_normalised
MOLM13_DMSO_72h_R2_censored_normalised
MOLM13_DMSO_72h_R3_censored_normalised
MOLM13_DMSO_72h_R4_censored_normalised
MOLM13_Res_1h_R1_censored_normalised
MOLM13_Res_1h_R2_censored_normalised
MOLM13_Res_1h_R3_censored_normalised
MOLM13_Res_1h_R4_censored_normalised
MOLM13_Res_24h_R1_censored_normalised
MOLM13_Res_24h_R2_censored_normalised
MOLM13_Res_24h_R3_censored_normalised
MOLM13_Res_24h_R4_censored_normalised
MOLM13_Res_72h_R1_censored_normalised
MOLM13_Res_72h_R2_censored_normalised
MOLM13_Res_72h_R3_censored_normalised
MOLM13_Res_72h_R4_censored_normalised
MOLM13_S9_1h_R1_censored_normalised
MOLM13_S9_1h_R2_censored_normalised
MOLM13_S9_1h_R3_censored_normalised
MOLM13_S9_1h_R4_censored_normalised
MOLM13_S9_24h_R1_censored_normalised
MOLM13_S9_24h_R2_censored_normalised
MOLM13_S9_24h_R3_censored_normalised
MOLM13_S9_24h_R4_censored_normalised
MOLM13_S9_72h_R1_censored_normalised
MOLM13_S9_72h_R2_censored_normalised
MOLM13_S9_72h_R3_censored_normalised
MOLM13_S9_72h_R4_censored_normalised
MV411_DMSO_1h_R1_censored_normalised
MV411_DMSO_1h_R2_censored_normalised
MV411_DMSO_1h_R3_censored_normalised
MV411_DMSO_1h_R4_censored_normalised
MV411_DMSO_24h_R1_censored_normalised
MV411_DMSO_24h_R2_censored_normalised
MV411_DMSO_24h_R3_censored_normalised
MV411_DMSO_24h_R4_censored_normalised
MV411_DMSO_72h_R1_censored_normalised
MV411_DMSO_72h_R2_censored_normalised
MV411_DMSO_72h_R3_censored_normalised
MV411_DMSO_72h_R4_censored_normalised
MV411_Res_1h_R1_censored_normalised
MV411_Res_1h_R2_censored_normalised
MV411_Res_1h_R3_censored_normalised
MV411_Res_1h_R4_censored_normalised
MV411_Res_24h_R1_censored_normalised
MV411_Res_24h_R2_censored_normalised
MV411_Res_24h_R3_censored_normalised
MV411_Res_24h_R4_censored_normalised
MV411_Res_72h_R1_censored_normalised
MV411_Res_72h_R2_censored_normalised
MV411_Res_72h_R3_censored_normalised
MV411_Res_72h_R4_censored_normalised
MV411_S9_1h_R1_censored_normalised
MV411_S9_1h_R2_censored_normalised
MV411_S9_1h_R3_censored_normalised
MV411_S9_1h_R4_censored_normalised
MV411_S9_24h_R1_censored_normalised
MV411_S9_24h_R2_censored_normalised
MV411_S9_24h_R3_censored_normalised
MV411_S9_24h_R4_censored_normalised
MV411_S9_72h_R1_censored_normalised
MV411_S9_72h_R2_censored_normalised
MV411_S9_72h_R3_censored_normalised
MV411_S9_72h_R4_censored_normalised
IsMaxSignal	Phospho-peptides: TRUE = ion with maximum sum of signal for a given phospho-peptide (used for the analysis, here FALSE are removed)
ModifiedSequence	phospho-peptide modified sequence
IonCount	number of ions matching the modified sequence
EG.ProteinPTMLocations	PTM localisation on the protein sequence
PG.ProteinAccessions	protein group accession
gene	gene name
MOLM13_S9_1h-MOLM13_DMSO_1h_P.Value	output of Limma analysis of phospho-data = MOLM13 =
MOLM13_S9_1h-MOLM13_DMSO_1h_adj.P.Val
MOLM13_S9_24h-MOLM13_DMSO_24h_P.Value
MOLM13_S9_24h-MOLM13_DMSO_24h_adj.P.Val
MOLM13_S9_72h-MOLM13_DMSO_72h_P.Value
MOLM13_S9_72h-MOLM13_DMSO_72h_adj.P.Val
log2FC-MOLM13_S9_1h-MOLM13_DMSO_1h	log2-transformed fold changes compared to DMSO (same time point) = MOLM13 =
log2FC-MOLM13_S9_24h-MOLM13_DMSO_24h
log2FC-MOLM13_S9_72h-MOLM13_DMSO_72h
MV411_S9_1h-MV411_DMSO_1h_P.Value	output of Limma analysis of phospho-data = MV411 =
MV411_S9_1h-MV411_DMSO_1h_adj.P.Val
MV411_S9_24h-MV411_DMSO_24h_P.Value
MV411_S9_24h-MV411_DMSO_24h_adj.P.Val
MV411_S9_72h-MV411_DMSO_72h_P.Value
MV411_S9_72h-MV411_DMSO_72h_adj.P.Val
log2FC-MV411_S9_1h-MV411_DMSO_1h	log2-transformed fold changes compared to DMSO (same time point) = MV411 =
log2FC-MV411_S9_24h-MV411_DMSO_24h
log2FC-MV411_S9_72h-MV411_DMSO_72h
count-MOLM13_DMSO_1h	count-… = number of measured value per condition; meanMV-… = mean per condition (without any imputation); meanNoMV-… = mean per condition (when no measured values, it is imputed with low value)
mean-MOLM13_DMSO_1h
meanNoMV-MOLM13_DMSO_1h
count-MOLM13_DMSO_24h
mean-MOLM13_DMSO_24h
meanNoMV-MOLM13_DMSO_24h
count-MOLM13_DMSO_72h
mean-MOLM13_DMSO_72h
meanNoMV-MOLM13_DMSO_72h
count-MOLM13_Res_1h
mean-MOLM13_Res_1h
meanNoMV-MOLM13_Res_1h
count-MOLM13_Res_24h
mean-MOLM13_Res_24h
meanNoMV-MOLM13_Res_24h
count-MOLM13_Res_72h
mean-MOLM13_Res_72h
meanNoMV-MOLM13_Res_72h
count-MOLM13_S9_1h
mean-MOLM13_S9_1h
meanNoMV-MOLM13_S9_1h
count-MOLM13_S9_24h
mean-MOLM13_S9_24h
meanNoMV-MOLM13_S9_24h
count-MOLM13_S9_72h
mean-MOLM13_S9_72h
meanNoMV-MOLM13_S9_72h
count-MV411_DMSO_1h
mean-MV411_DMSO_1h
meanNoMV-MV411_DMSO_1h
count-MV411_DMSO_24h
mean-MV411_DMSO_24h
meanNoMV-MV411_DMSO_24h
count-MV411_DMSO_72h
mean-MV411_DMSO_72h
meanNoMV-MV411_DMSO_72h
count-MV411_Res_1h
mean-MV411_Res_1h
meanNoMV-MV411_Res_1h
count-MV411_Res_24h
mean-MV411_Res_24h
meanNoMV-MV411_Res_24h
count-MV411_Res_72h
mean-MV411_Res_72h
meanNoMV-MV411_Res_72h
count-MV411_S9_1h
mean-MV411_S9_1h
meanNoMV-MV411_S9_1h
count-MV411_S9_24h
mean-MV411_S9_24h
meanNoMV-MV411_S9_24h
count-MV411_S9_72h
mean-MV411_S9_72h
meanNoMV-MV411_S9_72h
Disappeared_MOLM13_S9_1hVsMOLM13_DMSO_1h	TRUE if no detection in one condition, more than 3 values in the other one with a mean > twice the imputed noise
Disappeared_MOLM13_S9_24hVsMOLM13_DMSO_24h
Disappeared_MOLM13_S9_72hVsMOLM13_DMSO_72h
Disappeared_MV411_S9_1hVsMV411_DMSO_1h
Disappeared_MV411_S9_24hVsMV411_DMSO_24h
Disappeared_MV411_S9_72hVsMV411_DMSO_72h
ReplaceMissingVal_log2FC-MOLM13_S9_1h-MOLM13_DMSO_1h	log2-transformed values after replacement of missing values when no detection in one condition (using meanNoMV)
ReplaceMissingVal_log2FC-MOLM13_S9_24h-MOLM13_DMSO_24h
ReplaceMissingVal_log2FC-MOLM13_S9_72h-MOLM13_DMSO_72h
ReplaceMissingVal_log2FC-MV411_S9_1h-MV411_DMSO_1h
ReplaceMissingVal_log2FC-MV411_S9_24h-MV411_DMSO_24h
ReplaceMissingVal_log2FC-MV411_S9_72h-MV411_DMSO_72h
isHit_1h_MOLM13	has a corrected p-value ≤ 0.01 or is labelled "Disappeared" in min. one comparison against DMSO for each time point each cell line
isHit_24h_MOLM13
isHit_1h_MV411
isHit_24h_MV411
psite	phosphorylation site ID with Uniprot protein accession
gene_psite	phosphorylation site ID with gene name when available
PG.Res_P.Value_MOLM13	output of DEqMS analysis of protein groups: paired test Res Vs DMSO = MOLM13 =
PG.Res_adj.P.Val_MOLM13
PG.Res_sca.P.Value_MOLM13
PG.Res_sca.adj.pval_MOLM13
PG.S9_P.Value_MOLM13	output of DEqMS analysis of protein groups: paired test SHP099 treatment Vs DMSO = MOLM13 =
PG.S9_adj.P.Val_MOLM13
PG.S9_sca.P.Value_MOLM13
PG.S9_sca.adj.pval_MOLM13
PG.log2FC-Res_MOLM13	log2-transformed fold changes compared to DMSO (mean of time points) =MOLM13 =
PG.log2FC-S9_MOLM13
PG.Res_P.Value_MV411	output of DEqMS analysis of protein groups: paired test Res Vs DMSO = MV411 =
PG.Res_adj.P.Val_MV411
PG.Res_sca.P.Value_MV411
PG.Res_sca.adj.pval_MV411
PG.S9_P.Value_MV411	output of DEqMS analysis of protein groups: paired test SHP099 treatment Vs DMSO = MV411 =
PG.S9_adj.P.Val_MV411
PG.S9_sca.P.Value_MV411
PG.S9_sca.adj.pval_MV411
PG.log2FC-Res_MV411	log2-transformed fold changes compared to DMSO (mean of time points) =MV411 =
PG.log2FC-S9_MV411
PG.count-MOLM13_DMSO_1h	count-… = number of measured value per condition; meanMV-… = mean per condition (without any imputation); meanNoMV-… = mean per condition (when no measured values, it is imputed with low value)
PG.mean-MOLM13_DMSO_1h
PG.meanNoMV-MOLM13_DMSO_1h
PG.count-MOLM13_DMSO_24h
PG.mean-MOLM13_DMSO_24h
PG.meanNoMV-MOLM13_DMSO_24h
PG.count-MOLM13_DMSO_72h
PG.mean-MOLM13_DMSO_72h
PG.meanNoMV-MOLM13_DMSO_72h
PG.count-MOLM13_Res_1h
PG.mean-MOLM13_Res_1h
PG.meanNoMV-MOLM13_Res_1h
PG.count-MOLM13_Res_24h
PG.mean-MOLM13_Res_24h
PG.meanNoMV-MOLM13_Res_24h
PG.count-MOLM13_Res_72h
PG.mean-MOLM13_Res_72h
PG.meanNoMV-MOLM13_Res_72h
PG.count-MOLM13_S9_1h
PG.mean-MOLM13_S9_1h
PG.meanNoMV-MOLM13_S9_1h
PG.count-MOLM13_S9_24h
PG.mean-MOLM13_S9_24h
PG.meanNoMV-MOLM13_S9_24h
PG.count-MOLM13_S9_72h
PG.mean-MOLM13_S9_72h
PG.meanNoMV-MOLM13_S9_72h
PG.count-MV411_DMSO_1h
PG.mean-MV411_DMSO_1h
PG.meanNoMV-MV411_DMSO_1h
PG.count-MV411_DMSO_24h
PG.mean-MV411_DMSO_24h
PG.meanNoMV-MV411_DMSO_24h
PG.count-MV411_DMSO_72h
PG.mean-MV411_DMSO_72h
PG.meanNoMV-MV411_DMSO_72h
PG.count-MV411_Res_1h
PG.mean-MV411_Res_1h
PG.meanNoMV-MV411_Res_1h
PG.count-MV411_Res_24h
PG.mean-MV411_Res_24h
PG.meanNoMV-MV411_Res_24h
PG.count-MV411_Res_72h
PG.mean-MV411_Res_72h
PG.meanNoMV-MV411_Res_72h
PG.count-MV411_S9_1h
PG.mean-MV411_S9_1h
PG.meanNoMV-MV411_S9_1h
PG.count-MV411_S9_24h
PG.mean-MV411_S9_24h
PG.meanNoMV-MV411_S9_24h
PG.count-MV411_S9_72h
PG.mean-MV411_S9_72h
PG.meanNoMV-MV411_S9_72h
PG.ReplacedMV_log2FC_MOLM13_Res_1h_Vs_MOLM13_DMSO_1h	log2-transformed values after replacement of missing values when no detection in one condition (using meanNoMV)
PG.ReplacedMV_log2FC_MOLM13_Res_24h_Vs_MOLM13_DMSO_1h
PG.ReplacedMV_log2FC_MOLM13_Res_72h_Vs_MOLM13_DMSO_1h
PG.ReplacedMV_log2FC_MOLM13_S9_1h_Vs_MOLM13_DMSO_1h
PG.ReplacedMV_log2FC_MOLM13_S9_24h_Vs_MOLM13_DMSO_1h
PG.ReplacedMV_log2FC_MOLM13_S9_24h_Vs_MOLM13_DMSO_24h
PG.ReplacedMV_log2FC_MOLM13_S9_72h_Vs_MOLM13_DMSO_1h
PG.ReplacedMV_log2FC_MOLM13_S9_72h_Vs_MOLM13_DMSO_72h
PG.ReplacedMV_log2FC_MV411_Res_1h_Vs_MV411_DMSO_1h
PG.ReplacedMV_log2FC_MV411_Res_24h_Vs_MV411_DMSO_1h
PG.ReplacedMV_log2FC_MV411_Res_72h_Vs_MV411_DMSO_1h
PG.ReplacedMV_log2FC_MV411_S9_1h_Vs_MV411_DMSO_1h
PG.ReplacedMV_log2FC_MV411_S9_24h_Vs_MV411_DMSO_1h
PG.ReplacedMV_log2FC_MV411_S9_24h_Vs_MV411_DMSO_24h
PG.ReplacedMV_log2FC_MV411_S9_72h_Vs_MV411_DMSO_1h
PG.ReplacedMV_log2FC_MV411_S9_72h_Vs_MV411_DMSO_72h
PG.MatchToPhos	protein group in the spectronaut output with phosphorylated precursors
PG.ProteinGroups	protein group as reported in the protein data analysis
PearsonProtPhos_MOLM13	Pearson correlation between phospho-peptide and corresponding protein group signal
PearsonProtPhos_MV411	Pearson correlation between phospho-peptide and corresponding protein group signal
phosphoHits	TRUE = phosphorylation differencially regulated between Res and S9 at 1h. Corrected p-value of phospho-peptide ≤ 0.01 or "Disappeared" at 1h between Res and S9 and against DMSO for Res or S9 in min. one cell line.
modpepPhos_stripped	sequence stripped of all modifications
occupancy_MOLM13_DMSO_1h	calculation of phosphorylation occupancies when possible
occupancy_MOLM13_DMSO_24h
occupancy_MOLM13_DMSO_72h
occupancy_MOLM13_Res_1h
occupancy_MOLM13_Res_24h
occupancy_MOLM13_Res_72h
occupancy_MOLM13_S9_1h
occupancy_MOLM13_S9_24h
occupancy_MOLM13_S9_72h
occupancy_MV411_DMSO_1h
occupancy_MV411_DMSO_24h
occupancy_MV411_DMSO_72h
occupancy_MV411_Res_1h
occupancy_MV411_Res_24h
occupancy_MV411_Res_72h
occupancy_MV411_S9_1h
occupancy_MV411_S9_24h
occupancy_MV411_S9_72h

## Sheet: DIA prot and phospho
EG.PrecursorId	MOLM13_DMSO_1h_R1	MOLM13_DMSO_1h_R2	MOLM13_DMSO_1h_R3	MOLM13_DMSO_1h_R4	MOLM13_DMSO_24h_R1	MOLM13_DMSO_24h_R2	MOLM13_DMSO_24h_R3	MOLM13_DMSO_24h_R4	MOLM13_DMSO_72h_R1	MOLM13_DMSO_72h_R2	MOLM13_DMSO_72h_R3	MOLM13_DMSO_72h_R4	MOLM13_Res_1h_R1	MOLM13_Res_1h_R2	MOLM13_Res_1h_R3	MOLM13_Res_1h_R4	MOLM13_Res_24h_R1	MOLM13_Res_24h_R2	MOLM13_Res_24h_R3	MOLM13_Res_24h_R4	MOLM13_Res_72h_R1	MOLM13_Res_72h_R2	MOLM13_Res_72h_R3	MOLM13_Res_72h_R4	MOLM13_S9_1h_R1	MOLM13_S9_1h_R2	MOLM13_S9_1h_R3	MOLM13_S9_1h_R4	MOLM13_S9_24h_R1	MOLM13_S9_24h_R2	MOLM13_S9_24h_R3	MOLM13_S9_24h_R4	MOLM13_S9_72h_R1	MOLM13_S9_72h_R2	MOLM13_S9_72h_R3	MOLM13_S9_72h_R4	MV411_DMSO_1h_R1	MV411_DMSO_1h_R2	MV411_DMSO_1h_R3	MV411_DMSO_1h_R4	MV411_DMSO_24h_R1	MV411_DMSO_24h_R2	MV411_DMSO_24h_R3	MV411_DMSO_24h_R4	MV411_DMSO_72h_R1	MV411_DMSO_72h_R2	MV411_DMSO_72h_R3	MV411_DMSO_72h_R4	MV411_Res_1h_R1
_[Acetyl (Protein N-term)]AAAAAAAAAAGAAGGRGS[Phospho (STY)]GPGR_.3	16771.2	NA	9197.25	9350.39	12931.8	10613.1	9940.45	10607.1	9111.09	10845.3	13170.9	14417	24591.6	24423	16010.7	11984.2	23183.9	10194	14032	11043.7	15278.8	13154.3	7956.61	14013.5	19764	15061	11124.2	9969.21	12503.7	11720.5	8631.7	10033.8	13649.8	18760.6	9956.46	12223.7	3779.26	9452.29	15801.7	9914.19	6126.81	12335.2	8648.44	11289.7	13260.7	14001.9	16395	16001.4	9083.27
_[Acetyl (Protein N-term)]AAAAAAAGAAGS[Phospho (STY)]AAPAAAAGAPGSGGAPSGSQ[Deamidation (NQ)]GVLIGDR_.3	56232.5	NA	45024.5	NA	NA	NA	36437.3	53251.3	28032.1	NA	NA	NA	NA	NA	38606.2	NA	65882.1	NA	NA	NA	45747.7	60042.4	NA	41245.3	NA	NA	48010.2	NA	63115.1	NA	51401.6	45495	69230.5	62726.4	52753	60385.6	16221.4	42752.8	82829.8	63922.8	41613.8	61816.8	22988.3	56493	54804.3	73302.7	NA	71513.5	50754.2
_[Acetyl (Protein N-term)]AAAAAAAGAAGSAAPAAAAGAPGS[Phospho (STY)]GGAPSGSQGVLIGDR_.4	94992.5	NA	38972.4	46485	73463.1	55121.2	51223.9	65130.7	26833.2	53802.8	NA	45302.3	77585.8	78211.2	53200.5	42689.2	81925	64538.4	52148.9	53426.6	54907.3	67276.2	49564.6	NA	76033.2	73385.4	40190.1	29975.9	78064.7	56876.2	NA	NA	67623.4	87033.1	48746.4	58179.2	16463.1	35842.1	113039	NA	45249.8	64045.4	60649.4	58148.6	75129.5	62831.4	102978	64440.9	53506.1
_[Acetyl (Protein N-term)]AAAAAAAGAAGSAAPAAAAGAPGSGGAPS[Phospho (STY)]GSQ[Deamidation (NQ)]GVLIGDR_.4	45812.9	NA	21292.2	18834.6	NA	21566.7	34483.7	26834	27886.9	29269.4	NA	18273.7	33470.4	41869.8	30619.5	18297.8	42655.2	32898.2	10019	NA	27771.2	43197.9	22370.8	17869.5	NA	24572	NA	20277	37308.4	36866.5	28924.4	26307.3	44698.7	57608	34771.6	37241.3	18299.7	NA	93275	42446.8	28714	44747	NA	29012.8	69032.2	7554.72	57362.4	35110.3	61355.5
_[Acetyl (Protein N-term)]AAAAAAAGAAGSAAPAAAAGAPGSGGAPSGS[Phospho (STY)]QGVLIGDR_.3	61455.7	NA	32686.4	NA	NA	NA	35145.6	NA	NA	49125	44387.1	NA	NA	67592.8	36553.9	NA	NA	65149.2	55504.4	52871.8	48846	73610.5	41213.5	45198.8	NA	NA	53390	49402.6	63425.7	55982.6	52269	48832.4	62904	57540	55893.9	59798.6	15224.8	38580.9	73950.9	82930.8	36929.3	54304.4	59545.6	55179.2	64494.4	71786.1	85675.7	71208.4	47085
_[Acetyl (Protein N-term)]AAAAAAAGDS[Phospho (STY)]DS[Phospho (STY)]WDADAFSVEDPVR_.3	NA	NA	73041.4	50865.2	70113.5	NA	NA	67625.7	76534.8	NA	69863	52089.3	75463.7	NA	NA	40594.2	NA	NA	49149.9	NA	74564.2	59431.7	42156.5	50549.4	61098.9	NA	NA	35954.4	52138.2	NA	NA	NA	NA	NA	NA	NA	NA	NA	NA	55408.9	27650.3	NA	34100.9	46707.5	NA	75352.5	74148.4	82018.1	33595.4
_[Acetyl (Protein N-term)]AAAAAAAGDS[Phospho (STY)]DS[Phospho (STY)]WDADAFSVEDPVRK_.3	121018	29745.8	193699	153464	143009	195595	186187	234032	280563	258788	191850	188443	151280	186419	164898	173894	107229	129404	147108	173796	238918	196828	222009	160993	142427	NA	189104	166121	81183.5	117080	116415	151659	74966.3	37231.1	87480.5	69874.2	NA	NA	287489	248923	65229	NA	158319	196313	189746	305251	424474	361767	NA
_[Acetyl (Protein N-term)]AAAAAAAGDS[Phospho (STY)]DSWDADAFSVEDPVR_.3	2.57427e+06	83537.7	2.19213e+06	2.29117e+06	2.55299e+06	1.91461e+06	2195997	2721413	3.06397e+06	2.8664e+06	2469773	1.82137e+06	2.93863e+06	2508550	2.41382e+06	2.47087e+06	2.02363e+06	1.37405e+06	2.56967e+06	2.62515e+06	2.44825e+06	1.87442e+06	2549184	2358432	2.66306e+06	1206616	1.53742e+06	2.31377e+06	2.08193e+06	1.42849e+06	1.8396e+06	1.8377e+06	1686296	1.13713e+06	1.29357e+06	1.31326e+06	39937.9	1.06314e+06	3.12443e+06	2.76728e+06	1.33341e+06	1.69412e+06	2896555	2.23655e+06	1.89782e+06	2.76162e+06	4046141	3.18851e+06	1.56708e+06
_[Acetyl (Protein N-term)]AAAAAAAGDS[Phospho (STY)]DSWDADAFSVEDPVRK_.3	8029059	197510	6.69945e+06	7.0092e+06	8583806	6.35282e+06	7.69908e+06	9275241	9720900	8924040	9323349	8025411	9807036	11420140	9294642	7852393	11105379	7.1783e+06	8544778	9148383	7.34437e+06	8.34822e+06	7.95455e+06	8490779	8937456	5.86677e+06	6836419	6960703	7.11934e+06	6692905	6305080	6328274	5186426	4850895	4333213	4.75651e+06	172329	4446481	11730318	10304506	6.59553e+06	7033168	8360998	9057301	10241296	7529659	13517698	12853197	6662423
_[Acetyl (Protein N-term)]AAAAAAAGDSDS[Phospho (STY)]WDADAFSVEDPVRK_.3	4430762	103611	77201.3	3890108	4764254	3.50903e+06	4232130	450322	5326472	4892692	5113009	104841	5.39592e+06	6225738	5127307	4317121	6132549	3966202	96234.8	5.02056e+06	4.05578e+06	4550660	4359799	4.65964e+06	4927414	3.23235e+06	3.74721e+06	3821969	3939209	77870.8	3.47877e+06	3.51902e+06	2.846e+06	2682273	135559	2656293	93047.5	237761	6412312	5646266	78684.7	3.91207e+06	4583711	98274.3	382842	4125446	7411840	493281	85832
_[Acetyl (Protein N-term)]AAAAAAGPSPGSGPGDS[Phospho (STY)]PEGPEGEAPER_.3	202021	NA	165377	180526	245982	208981	263982	268781	311443	222158	228621	210756	298835	281827	179410	185305	265209	147094	180896	182786	307341	275257	215098	281567	259394	209852	153378	207556	203290	206099	222960	188576	109273	134429	98482.7	99144	52588.3	164527	357354	248175	176554	182760	210855	272377	278687	284045	337299	348973	181686
_[Acetyl (Protein N-term)]AAAAAAGPSPGSGPGDS[Phospho (STY)]PEGPEGEAPERR_.3	57183.1	17419.7	51517.6	56022.7	83507.6	63001.1	69264.1	83850.7	83953.4	61195.7	76057.1	56802.2	80601.4	74446.9	53066.3	51325.5	79539.1	40255.9	51529.6	56095	88244	78072.3	62119.2	69175.4	86203.5	58135.2	51350.7	55489	56341.1	55698.6	56242.4	56859.5	28462.9	37537.1	23722.1	28298.4	9411.33	35675.9	85140.3	58123.2	47253.8	46607.6	61137.3	69742.7	79270.7	73834.3	90494.1	100598	43975.8
_[Acetyl (Protein N-term)]AAAAAALS[Phospho (STY)]GAGTPPAGGGAGGGGAGGGGSPPGGWAVAR_.4	255022	13809	173433	207221	271036	225640	229128	255794	43561.6	260844	230157	179786	319059	292135	50521.3	42793.1	349298	166296	183371	185720	238355	41629.5	220941	183951	270542	259597	208843	209114	62661.6	265220	236669	227982	48805.1	57141.2	36142.3	149768	9689.36	119568	48916.4	258775	31797.5	178264	203105	41519.5	28594	229863	335009	273966	153965
_[Acetyl (Protein N-term)]AAAAAALSGAGT[Phospho (STY)]PPAGGGAGGGGAGGGGS[Phospho (STY)]PPGGWAVAR_.3	334272	198554	268703	337760	332409	409803	410008	444400	501433	391064	454127	318506	324720	437496	310537	305701	390690	288052	356859	356610	504762	437242	473723	368493	318290	538281	359053	372752	279642	402116	343498	381699	309973	407606	263405	275426	83202.3	239996	473971	443443	360597	362952	347296	391213	569274	538040	936756	489610	404564
_[Acetyl (Protein N-term)]AAAAAALSGAGT[Phospho (STY)]PPAGGGAGGGGAGGGGSPPGGWAVAR_.3	152202	63196.5	130444	127951	177636	117377	133654	151391	94652.8	130855	833912	120609	190143	151943	748878	98437.8	931538	153236	138802	160731	142488	134508	111705	115893	179978	141052	694382	145051	135950	117605	127363	108624	158420	176931	117964	126438	49004.2	529598	902466	155914	727312	648810	697520	149682	740147	770260	133685	134622	155502
_[Acetyl (Protein N-term)]AAAAAALSGAGTPPAGGGAGGGGAGGGGS[Phospho (STY)]PPGGWAVAR_.3	1.54358e+06	115801	1.27544e+06	1504562	1510167	1.23839e+06	1.47033e+06	1725189	1.70961e+06	1.46616e+06	1.5282e+06	1.3199e+06	1.58741e+06	1.60057e+06	1.35471e+06	1.13119e+06	1655864	1.06337e+06	1.14979e+06	1.35441e+06	1.33092e+06	1206547	1.36006e+06	1.42567e+06	1.76861e+06	1.65683e+06	1.2812e+06	1.47499e+06	1.63747e+06	1.39895e+06	1484613	1.54283e+06	1.22705e+06	1.33615e+06	1.00154e+06	1024616	546073	998605	1.61281e+06	1.66438e+06	1.36128e+06	1.24066e+06	1.31944e+06	1304849	1353619	1.42242e+06	2210177	1.51153e+06	1.33437e+06
_[Acetyl (Protein N-term)]AAAAPDSRVS[Phospho (STY)]EEENLK_.2	21883.4	NA	17547.1	19153.1	22152.5	13002.5	14748.2	21632	14925.2	10846	12894.1	14842.4	27703	20459.1	13980	13923.7	22756.7	8422.23	14410.4	15163.9	23774.5	13572.5	10023.6	16374.3	26350.3	15967.5	11531.7	17715.9	14735.9	8590.63	11691	NA	NA	NA	NA	NA	2785.72	5586.61	9570.75	9212.87	6246.22	6575.07	12287.7	10856.1	7446.88	9090.89	9433	17440.5	7560.95
_[Acetyl (Protein N-term)]AAAITDMADLEELSRLS[Phospho (STY)]PLPPGS[Phospho (STY)]PGSAAR_.3	31872.8	42213	80650.2	25889.5	34018.6	25130.9	NA	NA	234779	83229	41985.3	20874.1	39862.3	136308	23381.3	213740	79287.9	84856.1	21299.8	6904.02	311350	71379.7	83915.1	35631.8	132620	78212.7	13825.5	NA	24104.2	175693	17502.5	59733	29056.2	229824	NA	6895.1	7595.66	77995.1	437819	NA	13606.8	65501.2	NA	44668.5	33487.4	74329.6	17510	20740.6	134721
_[Acetyl (Protein N-term)]AAALGAS[Phospho (STY)]GGAGAGDDDFDQFDKPGAER_.3	NA	NA	NA	71636.6	NA	75461	NA	NA	NA	NA	NA	77357.1	NA	NA	NA	NA	NA	NA	NA	NA	NA	NA	NA	NA	NA	NA	NA	NA	NA	73998.2	NA	NA	NA	NA	NA	NA	NA	29382.8	NA	NA	NA	NA	NA	NA	NA	NA	NA	NA	24877.9
_[Acetyl (Protein N-term)]AAAMVPGRSES[Phospho (STY)]WER_.2	NA	NA	NA	NA	NA	NA	NA	NA	NA	NA	NA	NA	NA	NA	NA	NA	NA	NA	NA	NA	NA	NA	NA	NA	NA	58236.9	59453.8	NA	NA	43362.9	NA	NA	NA	61605.1	NA	NA	NA	NA	NA	NA	NA	NA	NA	NA	NA	NA	NA	NA	NA
_[Acetyl (Protein N-term)]AAAPQ[Deamidation (NQ)]APGRGS[Phospho (STY)]LR_.2	NA	NA	NA	NA	NA	NA	NA	NA	NA	NA	NA	NA	NA	NA	NA	12646.8	NA	NA	NA	NA	NA	NA	NA	NA	NA	NA	NA	NA	NA	NA	NA	NA	NA	NA	NA	NA	NA	NA	NA	NA	NA	13189.1	NA	NA	NA	NA	NA	NA	NA
_[Acetyl (Protein N-term)]AAAPQAPGRGS[Phospho (STY)]LR_.2	NA	NA	NA	NA	NA	NA	NA	NA	NA	NA	NA	NA	NA	NA	NA	NA	NA	NA	NA	NA	NA	NA	NA	NA	NA	NA	NA	NA	18510.1	NA	NA	NA	20780.9	25876.5	16327.9	20997	NA	NA	NA	NA	NA	NA	NA	NA	NA	NA	NA	NA	NA
_[Acetyl (Protein N-term)]AAAPQAPGRGS[Phospho (STY)]LRK_.3	33059.9	NA	14193.9	10708.4	43993.6	13174.5	16030.8	23636.5	11776.2	7447.32	12240.7	19963.1	34266.1	29435.6	17890.2	13785.2	43725.8	25588.1	17649.1	22969.9	19283.4	15120.5	9573.97	14769.4	31208.8	17319.8	16932.2	15208.4	51413.6	29840.9	19869.3	25626.8	53090	71596.2	44294.4	56546.4	NA	7749.45	14621.3	10726.5	8536.39	7812.17	7470.62	9432.87	NA	6831.4	14605.2	11665.9	NA
_[Acetyl (Protein N-term)]AAAS[Phospho (STY)]VTPPGSLELLQ[Deamidation (NQ)]PGFSK_.3	36322.5	NA	17878.5	NA	NA	NA	NA	NA	11752.7	NA	NA	5805.53	70028.7	NA	14084.2	NA	22057.6	12516.3	NA	NA	19197.1	NA	NA	NA	54554	28538.7	NA	11717.7	NA	13338.3	NA	14072.2	NA	15244.1	NA	NA	29699.3	27046.3	29805.8	NA	NA	7409.06	NA	11258	NA	NA	NA	NA	22139
_[Acetyl (Protein N-term)]AAASVT[Phospho (STY)]PPGS[Phospho (STY)]LELLQ[Deamidation (NQ)]PGFSK_.2	54882.6	NA	89131.4	16478.3	NA	NA	NA	NA	NA	NA	NA	NA	50655.1	NA	64985	30071.5	NA	NA	73879.3	NA	34380.1	12619.7	40034.1	NA	63659.3	79016.4	83147.3	25345	NA	NA	NA	20299.1	NA	NA	NA	NA	NA	8215.32	10242.9	36518.7	17466.9	NA	NA	NA	NA	NA	NA	NA	NA
_[Acetyl (Protein N-term)]AAASVT[Phospho (STY)]PPGS[Phospho (STY)]LELLQPGFSK_.3	NA	NA	26199.5	41370.2	19121.9	NA	NA	NA	NA	NA	25322.8	11871.7	NA	57192.2	21593.7	NA	NA	NA	45801	26875.4	34845	NA	20890.9	38486.8	27477.1	32729	23296.4	72557.5	NA	NA	NA	NA	11358.2	15597	NA	NA	NA	NA	38167.4	14079.5	11080.4	NA	NA	NA	NA	NA	NA	24044.9	15204.6
_[Acetyl (Protein N-term)]AAASVT[Phospho (STY)]PPGSLELLQ[Deamidation (NQ)]PGFSK_.2	30726.9	NA	28721.7	49735.8	28852.6	NA	NA	NA	NA	NA	NA	NA	NA	NA	40641	NA	NA	NA	NA	NA	NA	NA	NA	NA	NA	NA	49937.2	54686.1	31519.9	NA	NA	NA	NA	NA	14982.1	NA	4331.06	NA	NA	43100.9	NA	NA	NA	NA	NA	NA	NA	NA	35212.8
_[Acetyl (Protein N-term)]AAASVT[Phospho (STY)]PPGSLELLQPGFSK_.3	40379.3	NA	19783.8	15701.2	NA	NA	NA	5865.26	11890.9	NA	NA	6072.57	75034.4	34560.2	14289.9	44028.3	23601.5	14064.6	NA	NA	17125.3	NA	NA	7696.28	57722.9	26276.4	NA	11411.4	NA	16680	NA	15380.9	NA	NA	NA	NA	29975.3	27638.7	32520.3	4445.01	NA	9597.46	NA	NA	NA	NA	NA	NA	23065.4
_[Acetyl (Protein N-term)]AAASVTPPGS[Phospho (STY)]LELLQPGFSK_.3	NA	NA	NA	NA	10923.3	NA	NA	15045.9	NA	NA	NA	NA	63498.7	NA	13056.4	NA	NA	NA	NA	NA	NA	NA	NA	NA	NA	24275.4	NA	NA	NA	NA	13499	NA	NA	NA	NA	NA	26336.9	NA	NA	NA	NA	NA	NA	NA	NA	NA	NA	13327.4	18052.8
_[Acetyl (Protein N-term)]AAAVAAAGAGEPQ[Deamidation (NQ)]S[Phospho (STY)]PDELLPK_.2	2.1061e+06	NA	1.31566e+06	1.57507e+06	1.31605e+06	665259	880194	1.21146e+06	688181	964912	1339794	1.67741e+06	2549679	2.50798e+06	2.51065e+06	2.37239e+06	3.03454e+06	1.40998e+06	1.41747e+06	1.37347e+06	922402	917647	1.14839e+06	1.14157e+06	1.8299e+06	1.17145e+06	1.30632e+06	1.6004e+06	2.74465e+06	1.3576e+06	1693582	1.94872e+06	3.939e+06	5439895	4.0722e+06	5.03929e+06	206304	288021	604344	364415	269381	258354	292310	228710	180287	203122	413283	349580	701949
_[Acetyl (Protein N-term)]AAAVAAAGAGEPQS[Phospho (STY)]PDELLPK_.2	2189438	20026.6	1.35048e+06	1.62733e+06	1.35421e+06	684228	906551	1.25516e+06	708810	994661	1.3866e+06	1.73643e+06	2.65978e+06	2.63807e+06	2.60819e+06	2464528	3192639	1.45993e+06	1.45491e+06	1.41617e+06	942180	942391	1.18596e+06	1173518	1.90691e+06	1.2013e+06	1.34962e+06	1.6504e+06	2.86148e+06	1.40033e+06	1.74878e+06	2.01708e+06	4.12065e+06	5700013	4.23177e+06	5253974	209908	286481	624246	368673	269589	256700	295498	233339	178433	203721	415423	353718	714390
_[Acetyl (Protein N-term)]AAAVAAPLAAGGEEAAATTS[Phospho (STY)]VPGS[Phospho (STY)]PGLPGRR_.3	55178.4	8637.33	53160	50322.7	55359.2	46587.5	27287.6	48487.9	51016.2	39178.8	46281	38324.6	NA	64695.7	36148.6	39620.8	46223.3	41301.9	33888.4	NA	38843.4	36709.1	31471.7	30639.6	77186	114243	64246.3	57540.9	47249.8	52075.1	45883.4	38958.5	67792.2	87553	42881.3	50901.2	12420.8	95689.8	185145	154152	116198	105460	94461.4	124717	167608	127379	183077	108582	67713.5
_[Acetyl (Protein N-term)]AAAVAAPLAAGGEEAAATTSVPGS[Phospho (STY)]PGLPGR_.3	918336	15424.7	527667	602122	969115	490414	517437	732220	599818	593146	441478	334778	796429	506147	535222	417018	583156	362110	422281	545127	502392	381461	453169	397022	940653	500818	311947	482524	578531	321360	249483	300274	613653	391456	283387	368936	851419	924193	1.62238e+06	1.58349e+06	1.13089e+06	1.226e+06	1.32581e+06	1.38197e+06	820434	960912	1.29232e+06	975208	897113
_[Acetyl (Protein N-term)]AAAVAAPLAAGGEEAAATTSVPGS[Phospho (STY)]PGLPGRR_.3	1.76639e+06	26193.8	1165549	1.26783e+06	2.15065e+06	1.17624e+06	1292747	1.468e+06	1.30189e+06	1.22645e+06	1300663	1.49725e+06	1.3991e+06	1.5348e+06	1.14219e+06	946157	1.94781e+06	1.30063e+06	857424	1.24303e+06	1.01786e+06	1.17696e+06	810785	1.18641e+06	2.28998e+06	1.49467e+06	1.11078e+06	1.13704e+06	1.51849e+06	882225	559265	596382	1.12797e+06	1.10427e+06	623069	716871	1.15878e+06	2.13131e+06	3.73926e+06	2.79203e+06	2.66497e+06	2544274	2.75011e+06	2665533	2.74713e+06	2.06142e+06	2.45451e+06	2.88709e+06	1.88598e+06
_[Acetyl (Protein N-term)]AAAVLSGPSAGSAAGVPGGTGGLS[Phospho (STY)]AVSSGPR_.3	19459.6	NA	8230.45	9059.56	NA	9173.77	10481.1	10818.5	NA	NA	NA	NA	NA	NA	NA	NA	NA	NA	11674	11584.8	NA	NA	12911.8	NA	16814	9900.74	NA	13760.1	NA	NA	11666.7	9676.56	16513.8	13567.3	11263.2	19914.4	NA	NA	NA	20366.6	NA	NA	NA	NA	NA	NA	NA	13926.7	NA
_[Acetyl (Protein N-term)]AADDDNGDGTSLFDVFSAS[Phospho (STY)]PLK_.3	NA	NA	NA	NA	NA	NA	NA	5997.96	5147.49	4236.99	NA	NA	NA	NA	NA	4965.1	NA	NA	NA	NA	NA	NA	5673.71	NA	NA	NA	NA	NA	NA	NA	NA	NA	NA	NA	NA	NA	NA	NA	13197.1	NA	NA	NA	NA	NA	NA	NA	NA	9760.83	NA
_[Acetyl (Protein N-term)]AADS[Phospho (STY)]DDGAVSAPAASDGGVSK_.2	108610	NA	89865.6	84929.4	94196.8	79032.4	84913.2	115586	111346	72888.5	81939.2	77389.3	130852	127833	76051.9	68153.6	105770	68343.7	83812.3	77001.1	139250	98935.5	70646.3	96310.4	115260	127114	78483.2	88073.6	71571.4	74038.6	59104.3	63967.1	52307.8	58733	34366.3	NA	27532.2	81139.4	196699	136549	91052.3	106560	109566	130805	144543	140587	179044	174701	95600.4
_[Acetyl (Protein N-term)]AADVFMC[Carbamidomethyl (C)]S[Phospho (STY)]PR_.2	13941.5	NA	10552.1	11989.3	25681.8	11878.1	16422.1	18268.3	12135.5	9756.93	10024.9	7894.77	16831.1	13749.2	NA	8322.38	27563	14271.5	13486.7	14226.1	12704.8	11031.7	8364.35	NA	17994.2	12979.7	9799.75	10988.1	20063.8	13639.8	9914.67	9330.63	13266.8	NA	NA	8776.04	3033.63	NA	17578	NA	10240.7	14470	13072.5	15813.5	15304.3	12887.4	18908.6	14743.3	9017.03
_[Acetyl (Protein N-term)]AADVSVTHRPPLS[Phospho (STY)]PK_.3	8067161	78776.3	3.40693e+06	3844262	8772604	3.6049e+06	4353983	5.79042e+06	4.12654e+06	3.95226e+06	4.07165e+06	5642689	11117754	6216409	4.85593e+06	4.3318e+06	13286745	4.59397e+06	5.19778e+06	5.34831e+06	5.18597e+06	4581918	3573221	5792951	8993954	3.68615e+06	3514837	4062540	9142354	4.36556e+06	4337972	4.73376e+06	4356398	4.18259e+06	2883999	3.72939e+06	2442367	3999198	5722468	4666354	3.98626e+06	4.61358e+06	5.26283e+06	5476919	5.0088e+06	4.08864e+06	5.21831e+06	6553826	4294902
_[Acetyl (Protein N-term)]AADVSVTHRPPLS[Phospho (STY)]PKS[Phospho (STY)]GAEVEAGDAAER_.4	60886.3	18755.4	64848.7	48231.1	58889.2	65144.2	47338.5	56601.3	70345	56062.8	74064.6	73130.1	71420	90151.7	55445	49700.4	82466.6	70296.2	56316.3	46665.6	72597.3	59494.3	46136.2	57533.2	66275.7	99030.2	68515	57320.4	61949.6	78049.8	66537	63353.3	104174	130863	67462.2	91723.5	NA	40333.6	85368.4	67035.4	42114.5	48702.1	41257.6	68813.4	80073.8	67520.5	83261.3	73738.6	39722.7
_[Acetyl (Protein N-term)]AAFAVEPQGPALGSEPMMLGS[Phospho (STY)]PTSPK_.3	57221.5	NA	25351.9	NA	NA	3997.62	NA	54705.2	11380.9	41611.9	26292	NA	NA	NA	29781.4	NA	36298.4	NA	24237.3	NA	NA	32510.6	NA	NA	NA	NA	NA	14913.7	42584	NA	44290.6	31786.2	NA	21812.7	33041.8	NA	NA	NA	NA	NA	NA	NA	NA	NA	NA	NA	NA	20931.1	NA
_[Acetyl (Protein N-term)]AAGGDHGS[Phospho (STY)]PDSYR_.2	81244.5	NA	54179.8	54392.6	80044.4	61895.2	61016.9	82153.2	65534.3	48714.7	63004.9	47195.9	96841.8	71255.9	56209.2	52203.3	72020.9	54799.2	65950.4	69432.9	66379.8	49365.4	49845.1	71019	84273.1	63761.8	35332	64565.8	78549.9	54763.2	67815.5	68894.1	66303.1	54880.4	56052.6	59762.2	29783.1	48824	83186.1	71070.2	45549.6	57184.1	66713.6	63058.1	60798.7	61191.1	85198.4	79237.7	62861.7
_[Acetyl (Protein N-term)]AAGGDHGS[Phospho (STY)]PDSYRSPLASR_.3	47260.6	NA	34838.1	31912.6	44937.7	42484.4	39813.7	52024.3	46167	43931	51331	76704.5	50102	81459.4	29544.1	28283.8	98348.9	63811.4	33876.2	37904.9	43022.6	52159.1	24996	48837.3	52631.3	46993.7	51496.3	28959.7	40809.3	67419.7	25024.7	33226.5	26442	50727.7	19271.8	23373	NA	21165.9	68914.7	NA	30807.2	21136.7	36123.3	NA	60752.2	35929.7	57906.6	67399.1	23729.5
_[Acetyl (Protein N-term)]AAGT[Phospho (STY)]AAALAFLSQESR_.2	NA	NA	NA	NA	NA	NA	NA	NA	NA	NA	NA	NA	NA	NA	NA	NA	NA	NA	NA	NA	NA	NA	NA	NA	NA	NA	NA	NA	NA	NA	NA	NA	NA	NA	NA	NA	NA	NA	NA	NA	NA	NA	NA	NA	NA	NA	NA	54012.6	NA
_[Acetyl (Protein N-term)]AAGTAAALAFLS[Phospho (STY)]QESR_.2	NA	NA	196363	NA	NA	NA	NA	NA	NA	NA	128031	NA	229016	NA	156804	NA	NA	NA	98852.6	NA	NA	NA	NA	NA	NA	182116	NA	136134	128754	NA	139299	NA	NA	278584	83870.6	NA	NA	NA	NA	NA	NA	NA	NA	NA	NA	NA	NA	194858	NA
_[Acetyl (Protein N-term)]AALGHLAGEAAAAPGPGT[Phospho (STY)]PC[Carbamidomethyl (C)]ASR_.3	NA	NA	NA	36242.5	54466.9	44446.6	34789.5	42466.2	NA	32925.4	NA	35926.6	63905.2	NA	NA	NA	50677.4	NA	35387.9	NA	42380.9	31659	31350.7	NA	89327.1	NA	NA	49245.8	47098.7	43124.8	28876.9	NA	42854.7	60984	34173.5	NA	9767.55	22109.3	NA	37862.9	30879.4	39044.2	28459.2	37463.9	50185.6	40477	47660.2	41112.3	NA
_[Acetyl (Protein N-term)]AALHTTPDS[Phospho (STY)]PAAQ[Deamidation (NQ)]LER_.3	88574.1	NA	46617.9	52162	105675	48153.3	57429	62616.9	64710.1	56518.1	55376	70324.3	117892	68782.3	46889.2	40707	145587	66627.7	51447.4	61715.9	65470.5	52938	34502.5	48934.2	135657	65890.8	45701.2	50492.5	118305	70856.3	55653.9	62319.9	74898	64269.2	31320.7	51142.8	38967.1	74241.4	111652	94221.9	65623.6	97810.9	98480.3	112056	72947.1	75752.5	103867	142087	68216.3
_[Acetyl (Protein N-term)]AALHTTPDS[Phospho (STY)]PAAQLER_.2	242272	NA	137588	141047	305161	139190	159471	199210	151809	148844	145466	234912	303780	191433	121614	115315	407177	152131	155188	168390	169239	135666	111254	152092	384230	160048	122989	150457	337030	176877	181392	185636	173880	152640	97507.1	128255	118574	187515	372104	281489	200569	305351	303894	332561	201528	229991	318980	395558	234182
_[Acetyl (Protein N-term)]AALM[Oxidation (M)]TPGTGAPPAPGDFS[Phospho (STY)]GEGSQGLPDPSPEPK_.4	76581.7	NA	47641.1	35361.1	38559.1	51979.2	33133.1	40430.8	38514.2	NA	35045.8	NA	109186	110341	65916.2	47290	111621	80291.9	104779	88378.2	57061.8	68072.4	49779.7	53436	46532.5	35731.4	41922.4	25777.8	66627.2	75203.7	57861.1	46942.1	NA	85541.4	61250	67724	NA	NA	NA	NA	NA	NA	NA	NA	NA	NA	NA	NA	37737.6
_[Acetyl (Protein N-term)]AALM[Oxidation (M)]TPGTGAPPAPGDFSGEGS[Phospho (STY)]QGLPDPSPEPK_.3	62791.3	NA	48321.3	47985.4	57199.7	42721.7	50544.2	56508.3	43169.7	46271	60610.9	56368	172900	204885	145358	104976	223127	137884	200137	157388	97436.2	132836	97873.1	103935	67155.1	68143.4	51335	54808.5	109213	97935.2	110413	116947	148495	183448	157177	159089	20261.8	NA	NA	NA	30657.3	26606.7	13695.1	NA	NA	NA	NA	NA	75314.8
_[Acetyl (Protein N-term)]AALM[Oxidation (M)]TPGTGAPPAPGDFSGEGSQGLPDPS[Phospho (STY)]PEPK_.3	35881.8	NA	31504.3	28037.6	36691	27053.2	28945.2	34096.3	27167.7	31482.5	35038	31501.4	98777.3	116766	83309.5	59822	127920	81134.4	114917	87341.5	60992.4	74835.2	56202.2	60329.5	39043.3	39147.6	29797.5	30957	62855.8	56979.8	66511.3	65311.2	83829.3	104417	89990.3	89853.8	12447.7	NA	NA	NA	19852.9	14115	10924.6	NA	NA	NA	36994.3	NA	44965.6
_[Acetyl (Protein N-term)]AALMTPGTGAPPAPGDFSGEGS[Phospho (STY)]Q[Deamidation (NQ)]GLPDPSPEPK_.3	1.04477e+06	41588.3	745152	638001	779542	461202	690702	835039	597860	546718	726130	601508	2.91138e+06	2.07925e+06	1.80085e+06	1.34774e+06	3165104	1.87321e+06	2.65474e+06	2.2065e+06	1.6302e+06	1.54946e+06	1.66475e+06	1.25404e+06	985522	782704	670449	632059	1.8124e+06	1137182	1.38513e+06	1.41581e+06	1.55147e+06	1.95631e+06	1.73212e+06	1.63304e+06	64535.4	112841	325086	263800	195114	217064	270323	264279	206699	177501	310868	247460	663569
_[Acetyl (Protein N-term)]AALMTPGTGAPPAPGDFSGEGS[Phospho (STY)]QGLPDPSPEPK_.3	1.01241e+06	36024.8	715435	612317	751781	437853	665409	799368	571280	520707	701750	578491	2.83481e+06	2027073	1.74472e+06	1.3056e+06	3.07166e+06	1.82561e+06	2562518	2141012	1.57545e+06	1.49849e+06	1.606e+06	1.21298e+06	953474	765564	651759	608720	1761016	1111732	1.34616e+06	1.37025e+06	1.50315e+06	1.89586e+06	1.6747e+06	1.57447e+06	60322	108180	314572	251482	183965	206189	258078	254166	195878	164326	291129	226232	643495
_[Acetyl (Protein N-term)]AALS[Phospho (STY)]PTFATSTQDSTC[Carbamidomethyl (C)]LQDSEFPVSSK_.3	NA	NA	NA	NA	NA	NA	NA	NA	31581.4	NA	NA	NA	NA	NA	NA	NA	NA	NA	NA	NA	NA	NA	NA	NA	NA	NA	NA	NA	NA	NA	NA	NA	NA	NA	NA	NA	6678.09	10827.5	NA	25356.7	20262.7	25500.8	18606.7	NA	20240.7	NA	NA	29007.6	NA
_[Acetyl (Protein N-term)]AALVLEDGS[Phospho (STY)]VLR_.2	NA	NA	NA	NA	NA	NA	NA	NA	NA	NA	NA	NA	NA	NA	NA	NA	NA	NA	NA	NA	NA	NA	NA	NA	NA	NA	NA	NA	NA	NA	NA	NA	11276.9	13681.9	NA	NA	NA	NA	NA	NA	NA	NA	NA	NA	NA	NA	NA	NA	NA
_[Acetyl (Protein N-term)]AAPC[Carbamidomethyl (C)]GSELPANS[Phospho (STY)]PLK_.2	NA	NA	NA	NA	NA	NA	NA	155111	NA	NA	NA	NA	NA	NA	NA	NA	NA	NA	NA	NA	119047	NA	NA	NA	NA	NA	NA	NA	NA	NA	NA	NA	NA	NA	NA	NA	NA	NA	NA	NA	NA	NA	NA	NA	NA	NA	NA	NA	NA
_[Acetyl (Protein N-term)]AAPEEHDS[Phospho (STY)]PTEASQ[Deamidation (NQ)]PIVEEEETK_.3	387142	21603.8	303299	394406	425572	295065	331012	324358	381140	335071	394354	494728	407598	328919	294977	296375	396646	261896	304153	363046	302684	319504	268408	389657	498353	358580	315891	370897	421171	352145	379701	384588	235709	219770	183678	230791	43242.5	367090	400417	314488	330010	316800	361986	382933	360053	324227	344659	545378	244326
_[Acetyl (Protein N-term)]AAPEEHDS[Phospho (STY)]PTEASQPIVEEEETK_.3	389127	20238.6	303320	393079	424376	295719	330277	330022	380764	335071	394354	492047	408874	329033	294977	295855	396646	262258	304152	364213	303048	311000	268485	390551	494733	357765	316103	371142	421171	352675	379701	385852	240098	217566	182959	215840	40172.2	367401	399619	313989	330010	314859	361986	383383	361009	332386	343217	545006	245339
_[Acetyl (Protein N-term)]AAPEEHDSPTEAS[Phospho (STY)]QPIVEEEETK_.3	389007	20080	303166	386940	415141	292241	327840	323624	373027	333238	389750	161287	406809	324682	291421	295318	393182	261492	85713.7	362739	302684	99971.8	266367	127877	486777	356868	314305	370635	413780	352145	372972	384341	233212	213096	182266	NA	38759.8	366696	399151	310363	329428	314859	358259	378840	356905	321690	341068	545006	245242
_[Acetyl (Protein N-term)]AAPEPLS[Phospho (STY)]PAGGAGEEAPEEDEDEAEAEDPERPNAGAGGGR_.4	138945	NA	127428	137908	179558	107255	115421	143336	146122	141636	135502	130020	272888	225124	213238	191204	228668	167425	179337	235741	197331	176576	184429	231237	142191	NA	98206.8	113519	164337	128972	146927	135146	125474	63516.4	125605	160893	NA	NA	78232.9	60230.6	79482.3	55070.1	91969.2	100389	81711.7	70738.3	61241.8	115140	99715.6
_[Acetyl (Protein N-term)]AAPS[Phospho (STY)]PSGGGGSGGGSGSGTPGPVGSPAPGHPAVSSMQGK_.3	22876.8	NA	17107.2	NA	25071.1	22350.5	21990.7	29276.6	31720	22387.6	24641.9	23331.8	31608.2	28534	24377.9	NA	29623.5	24145.9	28855	23868.8	32616	27852.8	22452.7	26734.1	NA	23998.8	NA	19220.1	22080.9	NA	22897.4	22563	19851.8	22326.1	17082.2	20669.6	9020	24983.9	40695	31752.8	NA	25935.3	25592.1	32044.1	30842.9	28086.5	39113.7	29984.8	34682.6
_[Acetyl (Protein N-term)]AAPSPSGGGGSGGGSGSGTPGPVGS[Phospho (STY)]PAPGHPAVSSMQGK_.3	NA	NA	NA	NA	17411	NA	NA	NA	NA	NA	17813.2	NA	21270	NA	NA	NA	NA	NA	NA	NA	NA	NA	16476.2	NA	NA	14452.8	NA	NA	NA	NA	NA	NA	NA	NA	9272.98	NA	NA	9963.97	NA	NA	NA	NA	NA	10658	NA	12826.1	NA	21714	13033.2
_[Acetyl (Protein N-term)]AAQ[Deamidation (NQ)]GAAAAVAAGTSGVAGEGEPGPGEN[Deamidation (NQ)]AAAEGTAPSPGRVS[Phospho (STY)]PPTPAR_.4	NA	NA	NA	NA	NA	NA	NA	NA	NA	NA	NA	NA	NA	64854.2	NA	NA	NA	NA	54172.2	NA	NA	NA	NA	NA	NA	395193	NA	NA	64234.9	NA	NA	NA	NA	NA	NA	47610.7	22339.1	NA	NA	NA	NA	NA	NA	NA	NA	NA	NA	52638.6	NA
_[Acetyl (Protein N-term)]AAQ[Deamidation (NQ)]GAAAAVAAGTSGVAGEGEPGPGENAAAEGTAPS[Phospho (STY)]PGRVS[Phospho (STY)]PPTPAR_.4	644690	405091	605511	577159	510549	602272	42531	585290	75140.2	684071	719274	463981	742111	86589.3	69264.6	53902.3	599736	NA	66672.1	64848.3	53054.8	37934.8	573359	58529.5	87807.3	86972.6	448967	68597	98822.1	63556.9	88221.6	80915.3	55956	826114	44287.9	45747.1	9900.57	41989.1	1.20305e+06	80333.5	830671	58515.2	53776.7	71513.5	911745	90730.8	108658	738685	1.00791e+06
_[Acetyl (Protein N-term)]AAQ[Deamidation (NQ)]GAAAAVAAGTSGVAGEGEPGPGENAAAEGTAPSPGRVS[Phospho (STY)]PPTPAR_.4	724571	32457.9	434148	521368	805692	455364	461248	485784	444512	410692	392473	450415	946492	671882	635544	502090	879510	508190	608727	577343	490861	407461	427045	601006	991647	639580	343753	554282	46459.1	700569	812319	719940	921308	904111	692303	786785	749570	765457	681698	725780	790036	640204	697246	667657	434471	470026	493984	530793	734488
_[Acetyl (Protein N-term)]AAQGAAAAVAAGTSGVAGEGEPGPGENAAAEGTAPS[Phospho (STY)]PGR_.4	176482	9956.67	130310	142068	211557	184554	199076	213546	170407	135473	200181	160625	177949	189507	116660	133220	215090	150503	157450	157865	189043	215628	179002	165589	179407	164857	111438	151972	114830	107653	95955.4	107178	99579.5	128010	141290	121968	57962.1	131137	182970	163241	146747	176616	174374	172061	185280	197980	215927	214780	131749
_[Acetyl (Protein N-term)]AAQGAAAAVAAGTSGVAGEGEPGPGENAAAEGTAPS[Phospho (STY)]PGRVS[Phospho (STY)]PPTPAR_.4	2410111	1.4516e+06	2302875	2.19873e+06	1.89298e+06	2.22846e+06	2060044	2.21836e+06	2916294	2.52859e+06	2642888	1755879	2776547	3.24611e+06	2.73373e+06	1.98888e+06	2.19341e+06	1.83613e+06	2.60081e+06	2.33664e+06	2.75261e+06	2266219	2.13428e+06	2.08522e+06	2.1819e+06	3730599	1.73876e+06	2.59644e+06	2.35133e+06	2579355	3.26548e+06	2957385	2.18737e+06	2.92951e+06	2383251	2.04949e+06	1.62956e+06	3.15905e+06	4.46327e+06	5005232	3.03492e+06	3494333	2.43407e+06	3.05776e+06	3.34306e+06	3.56343e+06	5.22654e+06	2.75482e+06	3.59406e+06
_[Acetyl (Protein N-term)]AAQGAAAAVAAGTSGVAGEGEPGPGENAAAEGTAPSPGRVS[Phospho (STY)]PPTPAR_.4	1.70138e+06	82035	1.03322e+06	1.23748e+06	1.91143e+06	1.06489e+06	1.07809e+06	1.19243e+06	1.06267e+06	993813	945744	1.08417e+06	2.2218e+06	1.5741e+06	1.4956e+06	1.2091e+06	2.03996e+06	1.19768e+06	1.42804e+06	1.38494e+06	1.14444e+06	969246	1.01621e+06	1.43098e+06	2305567	1485037	815065	1.33673e+06	2.85975e+06	1.62433e+06	1.88328e+06	1.71444e+06	2.14813e+06	2.0794e+06	1.59941e+06	1.83564e+06	1.77292e+06	1.757e+06	1.62048e+06	1.69983e+06	1.82563e+06	1.4744e+06	1.62392e+06	1563285	1.02813e+06	1.09908e+06	1.15796e+06	1.26526e+06	1.68773e+06
_[Acetyl (Protein N-term)]AARDS[Phospho (STY)]DS[Phospho (STY)]EEDLVSYGTGLEPLEEGERPK_.3	278298	54916.2	375843	337202	217519	372116	348760	361451	440548	406564	403624	316461	262662	331538	380496	373924	243105	301060	366981	357594	409470	348797	393402	328997	243985	83812.4	391021	381350	159654	245751	336512	316508	156636	103939	164747	163678	NA	NA	359074	272513	163838	107881	186989	257724	273788	295941	390114	309189	78662.6
_[Acetyl (Protein N-term)]AAS[Phospho (STY)]DTERDGLAPEK_.2	494980	6873.73	303036	315436	469320	281808	346301	426270	429252	308671	332195	436440	672481	527068	348039	298161	682519	371212	366736	408395	530452	360327	280644	398891	557974	423949	287983	326346	468665	351097	320307	360375	279629	327943	206404	207251	128709	335483	712056	540059	376539	467111	499148	552769	501322	456059	623986	596240	375066
_[Acetyl (Protein N-term)]AASAAAASAAAASAASGS[Phospho (STY)]PGPGEGS[Phospho (STY)]AGGEK_.3	69043.8	24873.5	40607.7	NA	291300	45323.5	70341.4	NA	48081.4	42752.7	83246.6	NA	71006.2	84589.4	NA	74117.1	64722.9	85010.8	NA	NA	51641.1	107528	75542.8	NA	71581.7	73433.5	45640.1	51680.5	41216.2	57220.8	NA	NA	30898.7	61991.1	55816.5	53402.6	474864	412659	89426.9	77161.3	186021	55088.6	NA	57983.5	74748.2	64553.1	92521.3	58652.7	55358.1
_[Acetyl (Protein N-term)]AASAAAASAAAASAASGS[Phospho (STY)]PGPGEGSAGGEK_.3	35105092	2.64491e+06	25425552	30250482	40903964	38197476	34327628	42404880	37169656	31105926	34755144	31961776	41552172	38290208	29523524	30986322	37601700	27746622	35251280	36231552	40212772	33471694	31263308	33226804	44182308	39834520	24099198	32490722	35340336	33525050	30563372	32199372	25677916	27965996	20399514	21566654	21937670	259039	50166876	38881440	266737	299117	267056	46506684	52128532	323918	50897720	54042460	320280
_[Acetyl (Protein N-term)]AASAAAASAAAASAASGS[Phospho (STY)]PGPGEGSAGGEKR_.3	2840254	170676	4450992	3143423	3.42914e+06	5005898	5.41173e+06	6137040	5.77851e+06	5.56082e+06	10295195	6446488	4.04535e+06	4372757	3965142	3.97179e+06	3.58697e+06	4065592	4.71746e+06	3.45241e+06	6.10375e+06	5.52952e+06	4605192	7.7809e+06	4270791	3.00853e+06	3.16675e+06	3.59665e+06	2.27448e+06	3.55899e+06	2852786	2.68461e+06	2.52213e+06	2.30109e+06	2639003	2.57183e+06	460305	2.21016e+06	8757345	3.88726e+06	3.88154e+06	4906624	4.69296e+06	4.64616e+06	9482063	9270186	11481995	10882351	4458609
_[Acetyl (Protein N-term)]AASAAAASAAAASAASGSPGPGEGS[Phospho (STY)]AGGEKR_.3	2312614	129956	3.59164e+06	2.51103e+06	2.85857e+06	3.97762e+06	4297465	4882110	4587129	4.56681e+06	8.07327e+06	5038880	3.23527e+06	3.4849e+06	3.17474e+06	3.22058e+06	2.87553e+06	3.27442e+06	3.73886e+06	2.81219e+06	4837612	4.33693e+06	3714462	6191676	3443354	2.41034e+06	2.56452e+06	2.83729e+06	1.81908e+06	2.84596e+06	2.31724e+06	2.14871e+06	1.99208e+06	1.86039e+06	2.09627e+06	2.06794e+06	350914	1.74381e+06	6.81247e+06	3.14054e+06	3.10356e+06	55898.8	3.72138e+06	3.67547e+06	7252378	7.32234e+06	9047071	8446592	3.48232e+06
_[Acetyl (Protein N-term)]AASEAAVVSS[Phospho (STY)]PSLK_.2	28614.6	NA	15871.4	24350.9	44048.2	33866.3	39519.3	44005.2	29848.1	23831.5	32590.9	46373.5	42889	NA	24118.6	15954.3	37100.9	NA	30554.7	29079.8	44408.5	29037.1	19877.1	28777.7	39942.6	27103.9	15888.3	24467.7	33335.6	NA	NA	21346.7	NA	NA	NA	NA	9409.28	16027.9	NA	NA	15523.9	20255.8	NA	30611.4	18319	20730	27961.1	27589.3	15519.2
_[Acetyl (Protein N-term)]AASEVAGVVAN[Deamidation (NQ)]APS[Phospho (STY)]PPESSSLC[Carbamidomethyl (C)]ASK_.3	165433	NA	120205	108733	174223	144808	169212	164253	161215	143366	113143	96408.1	207282	192254	140316	122025	163719	110689	109719	128224	153754	140091	123221	112038	179136	213538	107145	145158	118867	118197	104990	90458.4	77866.9	85734.4	45536.7	55413.9	70774.3	181987	280900	239234	166639	190233	158990	165860	212957	197056	239731	183269	150364
_[Acetyl (Protein N-term)]AASEVAGVVANAPS[Phospho (STY)]PPESSSLC[Carbamidomethyl (C)]ASK_.3	147445	NA	114144	109806	146836	133866	156660	145249	146876	137266	111867	101230	184315	169991	130951	122581	138820	97162.6	106504	116889	140911	126742	121664	102462	150688	196687	105754	148683	103850	108488	104491	88177.7	73935.1	83277.6	51178.3	55478.8	71221.8	183297	233683	223946	163252	185960	161141	151309	195187	175153	207133	170285	143548
_[Acetyl (Protein N-term)]AAVDS[Phospho (STY)]DVES[Phospho (STY)]LPR_.2	NA	NA	NA	NA	NA	NA	NA	NA	NA	NA	NA	NA	NA	NA	NA	NA	NA	NA	NA	NA	NA	NA	NA	NA	NA	NA	NA	NA	NA	NA	NA	NA	NA	NA	NA	NA	NA	NA	NA	NA	NA	NA	NA	NA	NA	NA	NA	NA	NA
_[Acetyl (Protein N-term)]AAVDS[Phospho (STY)]DVESLPR_.2	NA	NA	24980.6	26199.5	42109.2	28779.9	29984	28458.1	24494	25644.5	24287.1	35640.4	42522.2	NA	31110	NA	47381.2	29476.2	24937.5	NA	33527.4	26209.4	18819.7	29705.2	40690.9	38460.3	23222.9	30700.2	29981.7	28666.2	23335.8	22330.2	29958.2	33844.5	31649.2	24128	7681.57	19576.3	45428.6	39636.1	23716.5	30878.2	23563.7	29823	29477.1	28489.4	37987.5	38403.6	20452
_[Acetyl (Protein N-term)]AAVDSDVES[Phospho (STY)]LPR_.2	NA	NA	NA	NA	NA	NA	NA	NA	NA	31360	NA	25944.8	NA	48073.2	NA	NA	NA	NA	NA	NA	NA	NA	NA	NA	NA	NA	NA	NA	NA	NA	NA	NA	NA	NA	NA	NA	NA	NA	NA	NA	NA	42393	NA	NA	NA	NA	NA	32519.6	NA
_[Acetyl (Protein N-term)]AAVLNAERLEVSVDGLTLSPDPEERPGAEGAPLLPPPLPPPS[Phospho (STY)]PPGSGR_.5	NA	NA	NA	NA	NA	NA	NA	NA	NA	NA	NA	29318.9	NA	NA	NA	NA	NA	NA	NA	NA	NA	NA	NA	16106.4	NA	NA	14758.3	NA	NA	NA	NA	NA	NA	NA	NA	NA	NA	NA	NA	NA	NA	NA	NA	NA	NA	NA	NA	NA	NA
_[Acetyl (Protein N-term)]AAVQVVGS[Phospho (STY)]WPSVQPR_.3	NA	NA	NA	NA	NA	NA	NA	NA	NA	NA	NA	NA	NA	NA	NA	NA	NA	NA	NA	NA	2674.8	NA	NA	NA	NA	NA	NA	NA	NA	NA	NA	NA	NA	NA	NA	NA	NA	NA	NA	NA	NA	NA	NA	NA	NA	NA	NA	NA	NA
_[Acetyl (Protein N-term)]AC[Carbamidomethyl (C)]GLVAS[Phospho (STY)]NLNLK_.2	NA	NA	NA	NA	NA	NA	NA	NA	NA	NA	NA	NA	NA	NA	NA	NA	NA	NA	NA	NA	NA	NA	NA	NA	NA	NA	NA	NA	NA	NA	NA	NA	NA	NA	NA	NA	NA	3088.07	NA	NA	NA	NA	NA	NA	NA	NA	NA	NA	NA
_[Acetyl (Protein N-term)]AC[Carbamidomethyl (C)]GLVAS[Phospho (STY)]NLNLKPGEC[Carbamidomethyl (C)]LR_.3	NA	NA	NA	NA	NA	NA	NA	NA	NA	NA	NA	NA	NA	NA	NA	NA	NA	NA	NA	NA	NA	NA	NA	NA	NA	NA	NA	NA	NA	10516	8606.38	NA	NA	NA	NA	NA	NA	NA	NA	NA	NA	NA	5406.93	NA	NA	NA	NA	NA	NA
_[Acetyl (Protein N-term)]AC[Carbamidomethyl (C)]RPRS[Phospho (STY)]PPR_.2	10028.2	NA	7333.26	5403.31	8861.35	7482.17	NA	7991.2	NA	NA	NA	NA	NA	NA	NA	NA	8583.32	NA	NA	NA	8462.11	NA	NA	NA	9603.45	9433.17	6944.07	NA	NA	NA	NA	NA	NA	NA	NA	NA	NA	3874.22	NA	7285.72	8566.22	5233.16	6820.02	9144.77	NA	NA	9692.04	NA	NA
_[Acetyl (Protein N-term)]ADDQGC[Carbamidomethyl (C)]IEEQGVEDS[Phospho (STY)]ANEDSVDAKPDR_.3	77289.4	4711.55	89239.9	77716.2	101506	73406.3	78360.2	103552	94426	59841.4	93538.4	65250.9	107542	103686	67679.2	72689.2	89685.7	49089.1	64928.7	64162.3	92199	53969.4	64766	53038.6	96801.7	40353	73171.5	65910.6	81381.7	60412.1	76867.7	87108.9	43919.2	29045.6	50055.3	45847.3	NA	13693.2	17576.7	15499	14792.1	NA	11597.7	17938.7	13373	15344.3	19274.9	19991.5	8730.25
_[Acetyl (Protein N-term)]ADEAALALQ[Deamidation (NQ)]PGGS[Phospho (STY)]PSAAGADREAAS[Phospho (STY)]SPAGEPLR_.4	39105.6	8949.22	30412.4	31167.7	37481.3	45317.8	37406.9	48478.5	62322.7	52432.5	69715.8	81355.5	50200.4	80873.3	37879.8	35501.3	85241.5	65813	46775	40343.7	55822.1	69232.7	43674.9	51282.9	41624.6	87060.7	44410.3	36074.1	45605.9	91559.4	39948.7	51981.8	32285.1	61041.3	26467.2	22348.7	2758.08	46439.7	107210	72977.7	47489.4	65751.6	45384.7	54908.4	113219	76395.1	119749	83615.9	53484.8
_[Acetyl (Protein N-term)]ADEAALALQ[Deamidation (NQ)]PGGS[Phospho (STY)]PSAAGADREAASSPAGEPLR_.3	161065	NA	124976	142903	148352	126141	132654	183320	183771	142676	195941	302381	209684	315596	158106	162542	370070	207823	136511	150082	151584	229800	142862	222308	206555	251192	212599	149432	141419	201926	96549.2	129614	84166.6	185993	85195.3	78700.4	19075.5	132534	243093	167026	146988	145360	170729	154787	265916	185376	229466	226154	138050
_[Acetyl (Protein N-term)]ADEAALALQPGGS[Phospho (STY)]PSAAGADR_.2	578639	14870	366130	457876	608000	438618	477566	532206	586449	414920	406340	373614	851039	531717	515434	390106	523321	297314	538496	540650	580587	394876	430600	485160	676930	498381	239340	589277	505726	322426	481092	493779	366357	335265	263931	334669	358423	550458	823549	784241	449526	735439	558991	653101	416639	581148	832473	576576	685114
_[Acetyl (Protein N-term)]ADEAALALQPGGS[Phospho (STY)]PSAAGADREAASSPAGEPLR_.3	225621	NA	165772	189649	203371	171975	179145	245445	247598	189717	266211	399896	284392	417256	212455	219393	489002	278446	189533	204214	202968	303408	193377	299321	277336	328932	279933	203861	191323	266863	131709	165186	118279	245253	114231	107475	27448.5	176432	323889	225793	198383	198568	234272	210517	352329	251564	307964	308196	188778
_[Acetyl (Protein N-term)]ADEDLIFRLEGVDGGQ[Deamidation (NQ)]S[Phospho (STY)]PR_.3	NA	NA	11905.7	10400.3	17695.3	15849.6	15550.4	13281.8	21491.7	30700.9	13476.3	46214.9	18472.7	21968.5	NA	11280.6	24079.8	17854.1	NA	13074.4	17285.3	18190.1	11330.2	22202.3	16809.9	NA	19136.2	8057.8	18806.4	13640.7	7689.65	7578.09	8765.86	19292.3	2273.34	7945.94	NA	14583.4	26631.9	15481.3	13160.7	15448.7	33793.5	11926.4	40238.4	25840.9	48736.7	31275.2	11228
_[Acetyl (Protein N-term)]ADEDLIFRLEGVDGGQS[Phospho (STY)]PR_.3	15007.5	NA	14536.6	12920.6	20487.4	17957.6	18913.9	15151.5	26101.8	36314.1	17616.3	52139.7	21723.1	27417	8242.16	11895.8	30367.5	20226.3	7532	15311.9	20859.6	20323.5	14250.5	25677.2	20005.4	13869.7	22588.9	10600.5	24978.7	16080.1	8091.79	9461.19	10441.7	18841.7	3452.19	9316.07	NA	11030	29080.2	14464.2	15805	13577.9	38422.6	10621.2	42292.5	30440.9	59182.9	43459.5	12012.3
_[Acetyl (Protein N-term)]ADFDDRVS[Phospho (STY)]DEEK_.2	78204.1	NA	61847.8	64193.6	85097.8	50641.9	68016.3	77900.1	62127.4	55005.7	52545.1	46518.3	85890.7	74304.5	57849.1	45547.7	73920.7	45686.4	59585.6	61211.6	66414.6	52908.5	43284	50593.2	97549.8	56357.6	51393.7	60943.5	79308.6	59422.8	62076.6	62062.7	53438.3	51455.9	32712.5	48403.2	7559.23	37758.8	77316.3	55151.5	37876.4	41572.4	51244.8	64023.3	47572.7	52686.9	60361.9	70389.3	30913.5
_[Acetyl (Protein N-term)]ADFDTYDDRAYSSFGGGRGS[Phospho (STY)]R_.3	NA	NA	NA	NA	NA	NA	NA	NA	NA	NA	NA	NA	NA	NA	NA	NA	28155.2	NA	NA	NA	NA	NA	NA	NA	NA	NA	NA	NA	NA	NA	NA	NA	NA	NA	NA	NA	NA	NA	NA	NA	NA	NA	NA	NA	NA	NA	NA	NA	NA
_[Acetyl (Protein N-term)]ADGDS[Phospho (STY)]GS[Phospho (STY)]ERGGGGGPC[Carbamidomethyl (C)]GFQPASR_.3	392963	73831.3	319854	273968	289866	267570	306937	327198	307056	357806	431120	427972	402759	578290	374189	275694	526702	546870	435253	360109	302524	333164	218417	290666	473253	454596	349048	281837	668338	643958	587806	533857	685757	699795	709703	645311	NA	509692	509139	415389	356289	490187	350363	431073	339138	306509	384028	377352	321052
_[Acetyl (Protein N-term)]ADGDS[Phospho (STY)]GSERGGGGGPC[Carbamidomethyl (C)]GFQPASR_.3	57787.7	NA	52761.9	37516.1	51940.6	46161.3	35829.6	57426.4	34885.8	28592.2	40758.4	48595.1	57492.4	126623	56550.6	49753.8	134179	108901	55567.3	49255.9	57736.1	78302.1	28793.4	48324.5	70852.6	83098.6	76485.5	37196.6	64905	95670.2	43389.9	47016.2	65833.6	100470	44693.7	39945.8	11298.3	59965.8	121147	73242.6	71411.2	62977.7	62735.2	65984.4	101363	63900.1	66510.6	67175.3	55106.3
_[Acetyl (Protein N-term)]ADHS[Phospho (STY)]FS[Phospho (STY)]DGVPSDSVEAAK_.2	NA	16212.6	48401.7	NA	68112.8	95922.9	72388.8	101425	67309.2	NA	NA	59583.7	NA	NA	NA	NA	NA	NA	51338	46381.9	95212.8	55811.6	54821.7	NA	48651	53321.3	42243.2	52535.1	NA	NA	NA	NA	NA	NA	NA	NA	NA	NA	NA	43046.5	48053.2	53253.2	43547.6	74439.2	85613.6	82494.9	114945	NA	NA
_[Acetyl (Protein N-term)]ADHS[Phospho (STY)]FSDGVPSDSVEAAK_.2	246662	NA	922661	207887	288183	212067	1.17859e+06	1.14418e+06	281963	205569	268237	215868	271035	209521	699936	NA	218318	96502.2	206819	217573	297540	185616	882034	235121	271237	284475	157806	231246	175259	125935	208040	174289	118112	87562.8	63627.9	125802	51051.1	157485	1.82729e+06	192140	152640	310660	189875	269128	205286	237374	1414653	326956	94811.4
_[Acetyl (Protein N-term)]ADHSFS[Phospho (STY)]DGVPS[Phospho (STY)]DSVEAAK_.2	74244.6	27085.1	81711.1	77874.6	105548	127611	117568	137714	104849	86136.7	109634	101024	NA	81580.6	62081.1	125252	NA	72536.6	79494.4	77598.1	153647	97784.9	84485	96280.9	80615.3	75495.5	88488.9	88843.9	NA	57828.7	71287.5	NA	NA	NA	46031.4	NA	NA	NA	NA	67823.6	74598.9	73868.5	66217.7	118528	141873	122519	146698	NA	NA
_[Acetyl (Protein N-term)]ADHSFS[Phospho (STY)]DGVPSDSVEAAK_.2	168900	NA	127389	135523	192748	140223	184022	208330	170314	107618	144890	138719	190025	140322	98435.6	92572.7	160198	91785.9	127850	141373	198866	110621	105151	155874	191394	131207	97651.3	141453	122947	83285.4	108163	97261.6	78367.5	67102.7	62830.9	79969	32094.6	73317.9	147915	111624	91471.6	112080	112079	152163	138798	146963	152472	188318	64520
_[Acetyl (Protein N-term)]ADHSFSDGVPS[Phospho (STY)]DSVEAAK_.2	65488.8	NA	101227	201390	256156	205056	76615.4	255244	NA	66948.6	171266	54162.7	248037	137010	NA	121841	60808.6	118992	76273.1	68923.6	77716.7	237451	49993	56990.3	78157.7	113551	54983.1	62287.1	112512	NA	NA	144539	91453.2	79725.8	NA	NA	21349.9	21044.8	285953	200285	131881	119456	193998	74021.9	66568.1	276035	276745	63107.4	32269
_[Acetyl (Protein N-term)]ADHSFSDGVPSDS[Phospho (STY)]VEAAK_.2	114682	NA	86701.6	92109	131361	286338	NA	425942	37317.2	NA	105724	95542.6	121187	100423	216057	67064.1	233804	40087.1	237882	95680.5	114964	334514	189050	296309	288762	160989	NA	274091	156137	82207.9	103535	85312.9	137061	109480	NA	84309.3	9271.71	96529.7	472655	288036	191274	178781	282047	NA	NA	339862	49604.5	125271	127990
_[Acetyl (Protein N-term)]ADKMDMS[Phospho (STY)]LDDIIK_.2	NA	NA	NA	NA	NA	NA	NA	NA	NA	NA	22861.3	NA	NA	NA	NA	NA	34635.4	NA	NA	NA	NA	18052	NA	13000.3	NA	NA	NA	NA	NA	NA	NA	NA	NA	NA	NA	NA	NA	NA	NA	NA	NA	NA	NA	NA	14487.5	NA	29113.9	NA	NA
_[Acetyl (Protein N-term)]ADKPDMGEIAS[Phospho (STY)]FDK_.2	NA	NA	88470.8	80954.1	NA	NA	89600.4	NA	NA	NA	NA	110318	124217	NA	NA	NA	128562	NA	66820.5	NA	NA	NA	NA	NA	NA	NA	84649.8	NA	82998.3	75475.8	77757.3	NA	NA	122730	NA	59186.3	16487	NA	NA	NA	NA	NA	NA	NA	NA	NA	NA	NA	53448.4
_[Acetyl (Protein N-term)]ADLDS[Phospho (STY)]PPK_.2	55005.2	NA	31850.5	37972.8	56885.6	38288.8	40310.3	45039.8	36624.3	23926.1	33170.9	42704.5	67391.7	56237	40081.2	19784.2	71870.9	36103.9	43601	39269.9	47139	34045.9	15148.8	38821.5	64035.2	38342.5	38441.3	37486.8	61126.4	46534.6	44529.1	45067.4	43846.2	41894.3	27742.2	35092.5	12865.4	24583.4	32660.6	29956.9	25143.2	27665.6	27697.9	33427.5	31619.5	34245.8	30699.6	41944.6	24709.9
_[Acetyl (Protein N-term)]ADLEEQLS[Phospho (STY)]DEEK_.2	82614.9	NA	73123.6	70570.1	114708	76766.7	137354	86450.6	69102.6	85153.4	66394.3	65642.9	103204	121467	88054.6	67398.5	107801	80679	73410.3	78340.2	103669	78764.6	69606.7	71423.4	79204.7	116475	76544.7	74928.2	89096	79117.2	84044.4	76440.7	69176.9	146645	58942.4	64069.5	NA	78378	106206	97825.9	76920.7	99330	77593.4	91430.1	93964.2	82883	105689	93090.2	64690.8
_[Acetyl (Protein N-term)]ADLSLADALTEPS[Phospho (STY)]PDIEGEIKR_.3	22839.5	NA	12861.4	20694.7	22072.8	NA	14125.4	16821.7	10496.3	14895.5	16872.4	17462.5	27978.1	35526.1	15666.8	14645.8	NA	23485.3	14525.4	NA	NA	11179.4	17108.6	16906.6	30382.7	NA	19416.8	10578.8	25762.3	NA	NA	NA	NA	NA	12947	12006	NA	NA	NA	16148.4	NA	8825.56	14864.3	NA	11645.7	14734.3	29842.7	17029.1	NA
_[Acetyl (Protein N-term)]ADMEDLFGS[Phospho (STY)]DADS[Phospho (STY)]EAER_.2	NA	NA	62608.4	55084.1	17127.9	36237.2	40973.8	48672.9	80785.5	46302.2	112552	39030.2	NA	NA	34025.2	69617.4	NA	NA	57889.5	42545.4	41218.5	66541.7	77306.8	54801.8	16248.8	NA	31519.9	97434.6	NA	NA	35466	39728.4	NA	NA	22031.1	18950.1	NA	NA	NA	39547.7	NA	NA	38560.9	NA	10418.2	70068.8	50488.5	64838.6	NA
_[Acetyl (Protein N-term)]ADMEDLFGS[Phospho (STY)]DADSEAER_.2	98995.7	NA	52269.7	61181.6	NA	49760.6	43876.1	60060.7	56845.2	46906.3	61853.4	47289.9	78977.8	91628.9	65903.7	64740.8	84727.9	56818	60152.2	67178.2	55052.2	66577.5	57653.9	71177.4	78783.2	31796.7	55520.9	55060.4	93760.7	82975.8	46320.5	63266.3	48829.1	51471.2	43607.8	44898.2	NA	27553.9	101276	72306.7	39621.4	38989.6	80417.8	64860.5	61638.2	50479.7	72085.2	48387.5	NA
_[Acetyl (Protein N-term)]ADMEDLFGS[Phospho (STY)]DADSEAERK_.2	NA	NA	NA	NA	NA	NA	19084.1	NA	NA	NA	NA	NA	NA	27121.5	NA	NA	NA	NA	NA	NA	NA	NA	NA	NA	NA	NA	NA	NA	NA	NA	NA	NA	NA	36936.8	NA	NA	NA	NA	NA	NA	NA	NA	NA	NA	NA	NA	NA	NA	NA
_[Acetyl (Protein N-term)]ADMEDLFGSDADS[Phospho (STY)]EAER_.2	53492.4	NA	38115.7	43721.6	44323.2	37568.3	28990	42884	40681.9	35091.3	47974.8	36847.5	53845.8	61287.3	48677.5	49601.8	53697.4	41553.1	46157	49977.1	36014.1	51077.2	43406.5	51532.2	53457.7	19674.2	37867.8	40231.3	57707.4	66456.6	34257.6	45564	35709.1	39313.2	31873.6	32232.6	NA	16599.1	65550.6	52271.4	27114.7	27659.4	55682.6	44649.7	47144.8	35293.3	51776.5	33211.3	26461.5
_[Acetyl (Protein N-term)]ADPAAGPPPS[Phospho (STY)]EGEESTVR_.2	204251	NA	148027	146191	191525	115210	155152	174178	149169	100351	145009	123589	235962	206458	171484	127280	232117	140577	160725	160356	204791	135252	115233	147596	195559	150543	125756	140367	193514	134819	156207	140234	202450	190210	164971	178005	38832.6	88781.5	160782	117831	69635.8	99110	107005	140765	113620	106272	130064	133008	94224.2
_[Acetyl (Protein N-term)]ADSGLREPQEDS[Phospho (STY)]QK_.2	43850.2	NA	NA	45910.8	40771.8	NA	52517.3	NA	NA	NA	NA	NA	NA	NA	NA	NA	33706.1	NA	52537.5	NA	NA	40249.4	50039.4	46198.7	NA	NA	NA	NA	25055.5	34032.3	34777.2	32830.4	39905.5	43107.8	37569.4	41589.1	NA	NA	NA	NA	NA	NA	NA	NA	NA	NA	NA	NA	NA
_[Acetyl (Protein N-term)]ADSGTAGGAALAAPAPGPGS[Phospho (STY)]GGPGPR_.3	NA	NA	NA	NA	NA	NA	NA	NA	NA	NA	NA	NA	NA	NA	NA	NA	NA	NA	NA	NA	NA	NA	NA	NA	NA	NA	NA	33524.8	NA	NA	NA	NA	NA	NA	NA	NA	4383.44	16279.3	NA	26296.1	NA	NA	NA	NA	NA	NA	NA	NA	NA
_[Acetyl (Protein N-term)]ADSS[Phospho (STY)]PALSLR_.2	11544.3	NA	13326.5	16283.3	35072.3	19278.4	NA	26436.2	13316.2	10436.1	13181.1	18823.6	NA	12402.2	NA	5849.41	NA	14149.9	13314.2	14580.7	9725.15	8289.34	7279.96	11898.1	15123.2	24504.8	15607.4	14329.9	22736.3	13444.2	12175.6	12267.2	9181.35	9646.92	7019.48	6708.89	4326.26	6189.37	NA	NA	8835.58	14312.7	9278.4	11677.1	12688.5	NA	14704.4	10945.8	4378.29
_[Acetyl (Protein N-term)]ADVLDLHEAGGEDFAM[Oxidation (M)]DEDGDES[Phospho (STY)]IHK_.3	NA	NA	148453	NA	278562	204498	201611	323460	234038	251239	175300	198551	NA	NA	222947	NA	NA	NA	194246	NA	221839	182176	187694	213513	185475	NA	NA	167848	NA	NA	153561	161812	NA	NA	NA	NA	NA	78195.3	292103	260209	174826	181771	NA	225392	259784	270386	329152	305699	171848
_[Acetyl (Protein N-term)]ADVLDLHEAGGEDFAMDEDGDES[Phospho (STY)]IHK_.3	86412	NA	119143	135804	252272	165800	172304	236594	165466	223326	123694	170960	185216	124653	116880	150626	167607	137196	160383	196429	177144	315644	178716	185217	171123	57517.5	115487	148915	117445	107597	140880	123496	114851	94800.9	86657.4	79905.7	NA	79083.5	176429	205996	154117	111141	209986	183612	226633	219840	257586	241588	142149
_[Acetyl (Protein N-term)]AEAPAS[Phospho (STY)]PAPLS[Phospho (STY)]PLEVELDPEFEPQSRPR_.3	NA	NA	NA	NA	NA	NA	NA	NA	53909.7	NA	NA	37710.7	NA	30407.9	NA	34122.3	NA	NA	NA	NA	NA	NA	52116.5	22410.9	NA	NA	NA	NA	NA	118413	NA	NA	28259.1	NA	NA	NA	NA	23232.9	39652.3	NA	NA	27163.2	NA	NA	NA	NA	NA	NA	NA
_[Acetyl (Protein N-term)]AEASSLGRQS[Phospho (STY)]PR_.2	NA	NA	15878.5	NA	NA	NA	NA	18875.6	NA	NA	NA	17973.5	29054.8	24761.5	13176.9	NA	36649.4	16936.2	NA	NA	NA	18851.1	NA	NA	26032	15252.3	15511.2	13247.6	NA	15181	NA	NA	13355.2	NA	NA	NA	NA	10809.2	35710.8	23106.6	14107.7	11540	22309.5	29266.7	NA	24720.5	NA	NA	NA
_[Acetyl (Protein N-term)]AEDEPDAKS[Phospho (STY)]PK_.2	10640.1	NA	8984.27	NA	NA	11130.4	NA	14760.7	13348.7	NA	16379.4	NA	19344.2	22646.4	12882.6	NA	23529.3	16355.9	18267.1	13512.9	19591.8	19319	NA	15641.3	15579.1	13566.1	NA	NA	8903.59	NA	NA	NA	11780.9	12858	NA	8304.1	NA	9613.32	20414.8	13086.4	15058.3	NA	14973.4	16860.9	23961.1	14511.8	21641.7	18610.4	29181.6
_[Acetyl (Protein N-term)]AEDVSS[Phospho (STY)]AAPS[Phospho (STY)]PR_.2	NA	NA	NA	NA	NA	NA	NA	NA	NA	NA	NA	NA	NA	NA	NA	NA	NA	NA	NA	NA	NA	NA	NA	NA	NA	35207.9	NA	NA	NA	NA	NA	NA	NA	NA	NA	NA	NA	NA	NA	NA	NA	NA	NA	NA	NA	NA	NA	NA	NA
_[Acetyl (Protein N-term)]AEDVSSAAPS[Phospho (STY)]PR_.2	209804	NA	141920	160528	228631	167206	164494	223148	183940	157553	195792	222779	226827	182030	127388	121456	209322	149787	169185	185609	202886	163098	132595	171376	229288	178236	128700	160781	193120	164945	154978	167074	167780	150598	105303	108673	82998.7	135181	250442	196891	165738	172431	193108	226473	187656	175021	246842	250085	144550
_[Acetyl (Protein N-term)]AENVVEPGPPS[Phospho (STY)]AK_.2	NA	NA	NA	NA	88152.6	78822.3	NA	77194.6	55518.2	NA	88307.3	102108	NA	84962.4	NA	NA	118194	NA	NA	NA	NA	NA	NA	99013.8	NA	NA	NA	NA	NA	NA	57395.1	NA	86825.2	108718	87743.6	101198	14646.2	28941	NA	NA	NA	NA	NA	NA	NA	62700.5	87033.9	92512.7	NA
_[Acetyl (Protein N-term)]AEPLQPDPGAAEDAAAQAVET[Phospho (STY)]PGWK_.3	28173.4	NA	20769	NA	41298.7	29408.1	22008.1	32853.4	27310.8	25531.4	137021	36099.6	31698.1	34098.2	25200.8	NA	35139.8	24464.8	NA	NA	NA	NA	NA	NA	48552	29810.9	NA	47263.9	35795.1	NA	19960.9	31689	23929.8	29595.1	30226.3	33366.4	4671.44	NA	NA	27049.7	NA	20055	26949.3	38625.2	NA	21150	32982.6	30285	NA
_[Acetyl (Protein N-term)]AEPPS[Phospho (STY)]PVHC[Carbamidomethyl (C)]VAAAAPTATVSEK_.3	261883	NA	128350	159684	265194	142715	150303	171073	161326	153397	147080	222052	367542	260909	135996	136495	396370	169705	184163	174455	180129	138591	112244	160071	303057	212383	136407	158432	256936	151387	164947	141784	162743	157291	105419	132214	165317	285537	177757	234595	231717	252004	229411	242987	170083	185037	166899	253088	237691
_[Acetyl (Protein N-term)]AEPSAATQ[Deamidation (NQ)]SHSISSSSFGAEPSAPGGGGS[Phospho (STY)]PGAC[Carbamidomethyl (C)]PALGTK_.4	617548	132345	521227	447861	579650	567650	762807	679467	682189	559559	590675	368029	636706	774146	401822	384753	601425	328897	386139	364305	649838	515485	495729	384695	705892	805270	514031	452281	639465	573329	804080	611907	428496	523541	374238	334351	378406	697902	742536	660706	587133	515943	559086	630646	869595	746616	650007	574183	444871
_[Acetyl (Protein N-term)]AEPSAATQSHSISSSSFGAEPSAPGGGGS[Phospho (STY)]PGAC[Carbamidomethyl (C)]PALGTK_.4	336969	100457	344091	222801	321868	328871	496661	384396	450482	365175	362462	193989	350676	468328	241840	210805	352246	202197	211433	179256	420811	331899	270122	200504	347141	480609	331413	223638	332838	348440	510606	351283	249921	341045	253393	174162	229223	467446	490077	415441	388735	318572	306437	385570	565846	474895	374820	343122	265498
_[Acetyl (Protein N-term)]AEQEPTAEQLAQIAAENEEDEHS[Phospho (STY)]VNYKPPAQK_.4	110327	NA	71052.2	90263.7	146400	79922.6	83519.2	98046.9	66708.8	64699.7	74047.6	109930	161314	158359	98774.3	93779	217333	135054	84191.9	98748.4	NA	87063.2	79009.5	91131.3	147068	145126	99267.7	82907.6	211752	131814	134894	113009	306343	431160	247668	303372	NA	119540	151173	98095.9	119874	133729	124438	120310	123681	80079.3	100641	90675.7	120666
_[Acetyl (Protein N-term)]AEQLS[Phospho (STY)]PGK_.2	34866.2	NA	37389.1	36768.9	46906.6	53465.3	48797.1	48601.4	51789.6	12691.9	50693.1	53638.6	57696.1	72459.9	54834.7	13052.8	58079.4	44228.5	35200.2	34223.1	62995.8	50780	10112.4	63396	26110.9	42536.8	30860.1	24730.9	21728.1	17319.2	26255.7	25329.4	57183.7	40766.4	40626.1	48142.2	45683.7	58666.8	64911.1	44818.9	58244.1	58975	56892.6	56511.1	72508.6	49740.2	60218.6	86512.2	55846.2
_[Acetyl (Protein N-term)]AES[Phospho (STY)]DWDTVTVLR_.2	NA	NA	NA	4033.83	NA	NA	NA	NA	NA	NA	NA	NA	NA	NA	NA	NA	NA	NA	NA	NA	NA	NA	NA	NA	NA	NA	NA	NA	NA	NA	3341.94	NA	NA	NA	NA	NA	NA	NA	NA	NA	4086.64	3700.3	NA	NA	NA	NA	7115.18	2157.81	NA
_[Acetyl (Protein N-term)]AES[Phospho (STY)]S[Phospho (STY)]ESFTMASSPAQR_.2	NA	NA	73331	NA	NA	106827	NA	NA	86551.3	NA	111080	103886	NA	NA	NA	NA	NA	NA	NA	NA	124279	NA	72103.8	NA	NA	141141	NA	NA	NA	NA	NA	NA	NA	NA	NA	NA	NA	NA	NA	NA	NA	NA	NA	NA	171305	101251	88544.3	138633	NA
_[Acetyl (Protein N-term)]AES[Phospho (STY)]SESFTMASS[Phospho (STY)]PAQR_.2	152697	38196.7	122497	173685	114558	183135	204761	200776	200029	179062	NA	160250	173083	158836	120867	243596	NA	NA	147187	135280	190002	170934	184241	154717	120581	185330	135256	171087	NA	NA	151164	NA	NA	NA	NA	NA	NA	NA	157949	156568	75552.5	135490	124787	171143	174279	162580	228707	152576	NA
_[Acetyl (Protein N-term)]AESLRS[Phospho (STY)]PR_.2	NA	NA	NA	NA	NA	NA	18374.4	NA	NA	NA	NA	NA	NA	NA	NA	NA	NA	NA	NA	NA	NA	NA	NA	NA	NA	NA	NA	NA	NA	NA	NA	NA	NA	NA	NA	NA	NA	NA	NA	NA	NA	NA	NA	NA	NA	20607	16063.9	17985.6	NA
_[Acetyl (Protein N-term)]AESSESFT[Phospho (STY)]MASSPAQR_.2	386078	43257.7	1.24027e+06	1.22913e+06	494369	327349	1.78434e+06	491462	1.70813e+06	1.63279e+06	1.83596e+06	385863	1729205	1.39045e+06	165184	1.18867e+06	1.68668e+06	250748	134704	1.29353e+06	1.61301e+06	1.4328e+06	294370	1536119	1.61488e+06	1.82754e+06	1.13853e+06	345210	1.51335e+06	1.38795e+06	1.44409e+06	1.43116e+06	155344	785444	656448	697084	517553	848417	158460	1.25555e+06	699179	223296	953795	NA	1.29255e+06	1.12752e+06	1.70166e+06	1428086	511535
_[Acetyl (Protein N-term)]AESSESFTM[Oxidation (M)]ASS[Phospho (STY)]PAQR_.2	177136	7275.4	128333	179211	183750	223055	168557	194125	179935	134943	220861	204295	170155	177751	140760	118893	126957	90943.6	166352	145741	175799	169047	127863	213790	187260	222166	131717	213567	159585	163954	167506	181151	85291.2	115787	86737.3	90144.7	81905.9	102621	126135	150498	115663	110843	111918	146948	156242	149546	191559	178917	70156.6
_[Acetyl (Protein N-term)]AESSESFTMASS[Phospho (STY)]PAQ[Deamidation (NQ)]R_.2	2.029e+06	58431.6	1.68656e+06	1.74181e+06	2154598	1.9413e+06	2461257	2.28524e+06	2414631	2236689	2610190	2.03626e+06	2.4158e+06	1.90463e+06	1.48831e+06	1719810	2.35749e+06	1.31332e+06	1.63254e+06	1.87143e+06	2222287	1.99837e+06	2.15977e+06	2242828	2.22084e+06	2580709	1.55968e+06	2092496	2.16375e+06	1.94352e+06	2.03464e+06	2.0594e+06	913650	1.13355e+06	928158	992851	761125	1.20082e+06	1.7915e+06	1.76267e+06	990702	1.40521e+06	1.37956e+06	1.5562e+06	1.82587e+06	1.60127e+06	2.43968e+06	1.99812e+06	725547
_[Acetyl (Protein N-term)]AESSESFTMASS[Phospho (STY)]PAQR_.2	3.34996e+06	103067	2707610	2.79465e+06	3.46277e+06	3.16174e+06	3912759	3.6798e+06	3883625	3.61005e+06	4.1245e+06	3.24604e+06	3.84888e+06	3.13248e+06	2396813	2.72544e+06	3778644	2.08684e+06	2.76277e+06	2997046	3.54588e+06	3161710	3.43785e+06	3514268	3.61594e+06	4.15186e+06	2.48607e+06	3.31105e+06	3.43681e+06	3090130	3251655	3284120	1.46051e+06	1.82635e+06	1469171	1.60413e+06	1.22621e+06	1956908	2833917	2797268	1.6005e+06	2.26138e+06	2.21625e+06	2563808	2.8848e+06	2.59284e+06	3849573	3.20839e+06	1.17561e+06
_[Acetyl (Protein N-term)]AESSESFTMASS[Phospho (STY)]PAQRR_.3	NA	NA	52739.6	42797.8	NA	55317.1	47057.1	73750	57684.7	55789.1	91810.6	88749.5	NA	81837.8	NA	NA	98523.5	68029	NA	NA	57915.9	56500.4	41918.4	84591	NA	49614.2	64233.9	NA	NA	65475	34159.6	NA	NA	NA	NA	NA	NA	NA	57204.9	NA	25475.3	22535.7	NA	43977.3	62540.6	44683.6	62561.2	82748.6	NA
_[Acetyl (Protein N-term)]AET[Phospho (STY)]LEFNDVYQEVK_.2	NA	NA	NA	NA	18146.2	NA	NA	NA	NA	NA	NA	NA	NA	NA	NA	13085	NA	NA	12780.2	NA	NA	NA	NA	NA	53589.9	11950	19069	NA	40277.7	18761.2	29012.1	17963.7	26150.5	26975	15270.1	20131.8	1575.79	4955.2	NA	NA	NA	NA	NA	NA	NA	NA	NA	NA	NA
_[Acetyl (Protein N-term)]AETEERS[Phospho (STY)]LDNFFAK_.2	NA	NA	NA	NA	NA	NA	NA	NA	NA	NA	NA	NA	NA	NA	NA	NA	NA	NA	NA	NA	NA	NA	NA	NA	NA	NA	NA	NA	16741.8	NA	NA	NA	NA	19342.8	NA	NA	NA	NA	NA	NA	NA	NA	NA	NA	22322	NA	NA	NA	NA
_[Acetyl (Protein N-term)]AETLSGLGDS[Phospho (STY)]GAAGAAALSSASSETGTR_.3	69039.6	NA	68225.8	85492.9	107203	61335.7	NA	67727.3	NA	55446.2	64497.7	69558.4	122175	NA	76892.1	NA	111533	61505.1	NA	72537.9	56516.6	NA	55569.4	NA	55580	179125	68415.1	101269	136662	67714.4	117762	NA	NA	117741	77473.2	66468.9	86239	122352	136382	150624	104489	50294	93725.1	80488.9	NA	84763.7	91777.8	53966.5	56101
_[Acetyl (Protein N-term)]AETLSGLGDSGAAGAAALSSASS[Phospho (STY)]ETGTR_.3	85287.4	NA	81866.8	105696	130084	74747.2	55482.5	83762.1	69298.3	67457.6	78998.6	83796.4	149946	130636	92694.9	76508.2	133993	74662.1	69262.5	88720.8	68174.7	49982.8	67592.2	54912.2	149391	215429	83284.4	123029	163889	83381	141586	121596	134116	139147	93940	81138.1	102999	148572	165389	181499	125348	121149	115931	98182.9	106728	102011	112986	90242.8	177524
_[Acetyl (Protein N-term)]AETLSGLGDSGAAGAAALSSASS[Phospho (STY)]ETGTRR_.3	207062	19115.2	248330	302244	360874	208536	138791	231923	165592	173862	351933	257967	340795	448990	235516	185327	581991	217531	184679	190743	215644	172369	208608	153276	391695	1068356	323343	330138	526571	292554	344752	298304	287127	451215	312574	230646	239053	506646	456944	423286	458709	370490	351936	287719	484229	258140	315137	281966	464428
_[Acetyl (Protein N-term)]AEY[Phospho (STY)]LASIFGTEK_.2	NA	NA	NA	NA	NA	NA	NA	NA	NA	NA	NA	NA	NA	NA	NA	21795.5	NA	NA	NA	NA	NA	NA	51430.2	NA	NA	NA	NA	NA	NA	NA	NA	NA	NA	NA	NA	NA	NA	NA	NA	NA	NA	NA	NA	NA	NA	NA	NA	NA	NA
_[Acetyl (Protein N-term)]AGAGSAAVSGAGT[Phospho (STY)]PVAGPTGR_.2	55942	NA	45276.2	49860.6	88613	44990.1	52920.7	70158.9	51805.9	51411.6	56253.2	70421.6	104055	70132.5	50668.3	46943.4	116702	61782.1	75422.7	73013.9	77770.2	65553.2	50571.6	76919.8	79897.1	38161	37952.5	44004.1	76379.2	42133.2	53064.6	51346.8	56304.3	54159.6	48599.6	66124.5	13633.7	27777.7	49841.8	NA	NA	36190.4	38027.6	53513.7	42886.6	35619.4	50026.9	61159.9	40215.7
_[Acetyl (Protein N-term)]AGLNS[Phospho (STY)]LEAVK_.2	7459.13	NA	NA	4471.29	NA	NA	2809.67	NA	NA	NA	NA	NA	NA	NA	NA	NA	NA	NA	4349.39	NA	NA	NA	NA	NA	9813.95	NA	3968.76	NA	9081.94	NA	3927.52	NA	NA	6979.94	NA	6249.75	NA	NA	NA	NA	NA	NA	NA	NA	NA	NA	NA	NA	NA
_[Acetyl (Protein N-term)]AGLS[Phospho (STY)]DLELRR_.2	11034.7	NA	7187.41	10019.3	12427.9	7241.2	8776.23	12080	7398.16	7484.76	NA	NA	17468.6	12969.8	9555.84	8378.97	22270.2	10363.3	8153.02	11439.2	9232.4	NA	6166.58	8108.91	14398.3	11547.2	7972.27	11501.8	16402.2	7377.81	9630.97	8096.82	9448.93	11732	NA	NA	3008.09	5426.5	10466.6	7606.01	4912.07	6261.51	6073.21	7201.72	6342.91	6983.13	6241.4	8899.12	5035.55
_[Acetyl (Protein N-term)]AGS[Phospho (STY)]PELVVLDPPWDK_.2	87287.9	NA	103512	26408.1	41292.4	15482.6	NA	NA	179590	44176.3	NA	35049.3	195515	98911.3	66627.9	119985	148254	NA	34642.6	NA	179615	52377.1	54256.2	31314.5	277203	NA	19424.8	NA	32388.6	170514	32103.6	75450.9	30150.3	156191	NA	17156.3	37410.3	101695	316604	NA	NA	37811.4	10703.1	50800.9	21999.2	40579.7	18051.7	NA	60447.4
_[Acetyl (Protein N-term)]AGSGAGVRC[Carbamidomethyl (C)]S[Phospho (STY)]LLR_.2	NA	NA	NA	NA	NA	NA	47369.5	NA	NA	NA	NA	NA	NA	NA	NA	NA	NA	NA	NA	NA	NA	NA	NA	NA	NA	NA	NA	NA	NA	NA	NA	NA	NA	NA	NA	NA	NA	NA	NA	NA	NA	NA	NA	NA	NA	NA	NA	27943.3	NA
_[Acetyl (Protein N-term)]AGT[Phospho (STY)]VVLDDVELR_.2	NA	NA	7318.44	16762.6	19001.9	NA	NA	NA	NA	NA	NA	11499.2	NA	NA	NA	NA	NA	NA	23845.3	NA	NA	NA	NA	NA	NA	NA	NA	NA	27859.3	11471.6	14505.8	13817.7	45531.7	41158.2	28612.1	35768.7	NA	NA	NA	NA	NA	NA	NA	NA	NA	NA	NA	NA	NA
_[Acetyl (Protein N-term)]AGVSFS[Phospho (STY)]GHR_.2	NA	NA	NA	NA	NA	NA	NA	NA	NA	NA	NA	NA	NA	NA	NA	NA	NA	NA	NA	NA	NA	NA	NA	NA	NA	3610.38	NA	NA	NA	NA	NA	NA	NA	NA	NA	NA	NA	NA	NA	NA	NA	NA	NA	NA	NA	NA	NA	NA	NA
_[Acetyl (Protein N-term)]AHS[Phospho (STY)]PVAVQVPGM[Oxidation (M)]Q[Deamidation (NQ)]NN[Deamidation (NQ)]IADPEELFTK_.3	66080.5	NA	47316.8	NA	65661.7	NA	NA	55411.6	NA	39789.1	38330	41585.9	59225.3	NA	53555.2	NA	NA	NA	68834.1	NA	34150	NA	NA	NA	62777.1	42146.6	54118.9	37607.8	NA	NA	NA	42345.4	82096.1	68562.7	NA	62622.2	27475	35691.8	61209.6	NA	NA	40662.1	46361.7	42101.6	41257.9	47872.2	NA	46835.2	38550.5
_[Acetyl (Protein N-term)]AHS[Phospho (STY)]PVAVQVPGM[Oxidation (M)]QN[Deamidation (NQ)]NIADPEELFTK_.3	61264.9	NA	39221.8	47317.6	60045.3	64753	44478	NA	33380.1	35440.5	NA	34755.8	NA	55486.1	46263.2	36358.8	NA	29971.3	NA	37080.9	25663.3	31856.2	NA	38273	55660.5	42664.4	33798.1	35053.6	NA	46671	34242.1	39694.3	73758.2	67143.8	54537.3	60273.5	30295.6	35216.2	45674.3	37197.2	47445.6	39669.3	44236.9	36884.1	37715.4	38248.9	43679.7	39024.9	34295.8
_[Acetyl (Protein N-term)]AHS[Phospho (STY)]PVAVQVPGM[Oxidation (M)]QNNIADPEELFTK_.3	60739.6	NA	37174.2	49883	64212.8	45506	45630.1	48786.1	42970.4	39789.1	38330	40528.7	52598.1	53539.3	42305.2	46410	57608.5	NA	68834.1	42516.4	33374.3	30196.5	NA	42410.2	59810.1	43021.8	43158.3	36774.3	59914.9	52188.9	36866.8	40698.2	75351.3	63910.9	52282.1	61230.4	27475	34565.1	51794.2	41625.8	45136.6	38524.5	46439.6	42101.6	38847	47872.2	52120.1	48216.7	35000.5
_[Acetyl (Protein N-term)]AHS[Phospho (STY)]PVAVQVPGMQ[Deamidation (NQ)]N[Deamidation (NQ)]NIADPEELFTK_.3	294943	NA	244995	174323	407756	214510	306904	171404	225038	212103	152092	258011	227572	229818	234810	229017	297561	156109	120264	210043	219219	220148	204341	220627	276164	213661	227081	207178	402019	165978	175702	NA	260257	378378	212455	361702	204111	128629	186711	200729	124349	142478	197391	205910	234235	251515	299377	185428	203793
_[Acetyl (Protein N-term)]AHS[Phospho (STY)]PVAVQVPGMQ[Deamidation (NQ)]NNIADPEELFTK_.3	390927	NA	323062	228825	534895	281444	399463	226478	296713	280835	200194	343240	276774	299588	307719	301657	389962	203016	163691	279031	285216	289462	258982	286879	360867	274698	309011	254778	524056	216774	215672	264894	344340	479147	277692	477906	269620	168346	238418	263887	163982	344954	259427	267297	298490	329148	389781	239254	268588
_[Acetyl (Protein N-term)]AHS[Phospho (STY)]PVAVQVPGMQN[Deamidation (NQ)]NIADPEELFTK_.3	390927	NA	323062	228825	534895	281444	399463	226478	296713	262362	200194	343240	295643	299588	307852	302593	389962	203016	163691	279031	285216	289462	258982	271728	360867	274698	309011	254778	524056	217341	229329	264894	344340	479147	269851	477906	269620	169145	238418	263887	163982	82083	107608	267297	298490	329417	389781	239254	268588
_[Acetyl (Protein N-term)]AHS[Phospho (STY)]PVAVQVPGMQNNIADPEELFTK_.3	319015	NA	262163	172324	434695	227272	323364	183351	240285	211692	161165	277534	237794	242856	248925	245779	304662	169515	123396	226420	232575	234158	217437	229239	294937	224585	242792	218810	424121	176329	185190	210757	278302	404697	222944	388575	221153	137928	190220	224276	132619	276657	209373	213429	240852	269152	316443	203123	216964
_[Acetyl (Protein N-term)]AKS[Phospho (STY)]PENSTLEEILGQYQR_.3	11479.1	NA	9834.33	10568.3	10813.6	8589.15	11649.3	10988.9	12254.7	12655.4	10799.7	7398.58	15405.7	13746.2	11140.1	11457.3	13034.5	12523.1	8297.16	8328.27	11696.1	11567.4	9538.61	10427.7	11538.4	7119.77	7508.91	7695.13	6676.65	NA	NA	6375.09	9467.02	11856	NA	8564.81	NA	NA	17361.8	9816.21	5953.73	4587.1	12021.9	12165	10955.9	11530.8	17988.2	15653.7	5945.36
_[Acetyl (Protein N-term)]ALEVGDM[Oxidation (M)]EDGQ[Deamidation (NQ)]LS[Phospho (STY)]DS[Phospho (STY)]DSDMTVAPSDRPLQLPK_.4	NA	NA	NA	NA	NA	55624.4	41783.1	71232.6	60487.1	55174	NA	NA	NA	NA	NA	NA	NA	NA	40278	NA	55993.4	NA	52033.2	38074.6	NA	NA	NA	41254.8	NA	NA	NA	NA	NA	NA	NA	NA	NA	NA	NA	NA	NA	NA	NA	NA	NA	55282.3	NA	23005.1	NA
_[Acetyl (Protein N-term)]ALEVGDMEDGQ[Deamidation (NQ)]LS[Phospho (STY)]DS[Phospho (STY)]DSDMTVAPSDRPLQLPK_.4	24750.7	NA	39370	29302.9	26311.1	39560	27479.2	30107	41173.7	37496.5	31629.8	26965.6	NA	NA	23975.1	29417.1	NA	NA	20962.8	21244.9	32976	26530.3	35304.1	27313.7	NA	NA	NA	22986.9	NA	NA	24999	NA	NA	NA	NA	NA	NA	NA	NA	20605.4	NA	NA	NA	19432.2	NA	37266.5	51212.6	36376.3	NA
_[Acetyl (Protein N-term)]ALHS[Phospho (STY)]PQYIFGDFSPDEFNQFFVTPR_.3	NA	NA	NA	NA	NA	NA	NA	NA	NA	NA	NA	NA	67074.1	NA	NA	NA	NA	NA	NA	NA	NA	NA	NA	NA	84515.8	NA	NA	NA	NA	NA	NA	NA	NA	NA	NA	NA	NA	NA	NA	NA	NA	NA	NA	NA	NA	NA	NA	NA	NA
_[Acetyl (Protein N-term)]ALSVPGYS[Phospho (STY)]PGFR_.2	NA	NA	NA	6298.66	10365.8	9237.99	NA	10823.6	NA	6084.08	5842.8	NA	NA	NA	NA	6016.66	8731.18	NA	3720.88	6559.12	5077.44	NA	8621.98	8727.88	NA	5518.95	4963.84	8030.45	NA	NA	NA	NA	NA	NA	NA	NA	NA	NA	7254.51	NA	4163.12	4912.07	4439.22	13442.4	6144.25	5952.3	14868.5	8739.9	NA
_[Acetyl (Protein N-term)]ALTSFLPAPTQLS[Phospho (STY)]QDQLEAEEK_.3	40208.6	NA	34256.9	NA	NA	NA	NA	NA	34933.7	NA	12693	NA	51827.5	NA	26674.5	NA	58170.6	51073.8	31772.7	NA	34620.2	34557.6	NA	NA	73424.5	NA	NA	NA	NA	44987	NA	31036.1	6447.89	43256.6	NA	NA	NA	NA	30066.4	NA	NA	NA	NA	NA	NA	NA	NA	NA	NA
_[Acetyl (Protein N-term)]ALVFVYGT[Phospho (STY)]LKR_.2	NA	NA	NA	NA	NA	NA	NA	NA	NA	NA	NA	NA	NA	NA	NA	NA	NA	NA	NA	NA	NA	NA	NA	NA	NA	NA	NA	NA	8196.61	NA	NA	NA	7471.1	13036.5	4154.41	8017.07	NA	NA	NA	NA	NA	NA	NA	NA	NA	NA	NA	NA	NA
_[Acetyl (Protein N-term)]ALVT[Phospho (STY)]VSRSPPGSGASTPVGPWDQAVQR_.4	41636.6	NA	22879.6	27520.5	48663.9	25101.9	22397	32757	27960.7	27044.8	22638.6	25280.3	81238.8	66522.8	40502.5	39787	107210	51711.7	34693.7	39635.3	41197.7	29845.4	37221.5	29143.2	50684	29523	27030.8	24466.7	44925.7	36256.1	29817.4	27197.7	31432.6	26395.3	22134.3	21184.8	7375.61	18268.6	55199.9	38035.7	21113.5	25615.4	31093.9	37228.2	27625.2	28972.5	40773.4	43311.7	33476.2
_[Acetyl (Protein N-term)]ALVTVSRS[Phospho (STY)]PPGSGASTPVGPWDQ[Deamidation (NQ)]AVQR_.3	428762	NA	292931	319690	491998	230781	315516	363277	294401	287982	325504	363054	828830	632761	462175	432209	1.12161e+06	537966	522181	576818	391940	387761	357400	451471	477674	366363	268605	328457	492141	404268	412033	384149	377501	398935	357729	353563	159875	347403	496140	479000	372809	424889	535922	403268	343900	387122	469946	550881	560596
_[Acetyl (Protein N-term)]ALVTVSRS[Phospho (STY)]PPGSGASTPVGPWDQAVQR_.3	726195	32202.2	484860	521691	821512	397017	522348	612114	480450	471442	524078	607671	1.3979e+06	1.09668e+06	804009	738003	1.92294e+06	915581	876080	954588	663627	649671	592049	737289	820589	604869	456648	539814	823743	688139	672431	644069	639551	658598	582053	581191	260465	552021	849724	790988	601580	675139	874378	679618	539419	627694	799633	902732	933325
_[Acetyl (Protein N-term)]AM[Oxidation (M)]S[Phospho (STY)]S[Phospho (STY)]GGSGGGVPEQEDSVLFR_.3	NA	12184.4	NA	31192.3	NA	NA	NA	NA	NA	NA	23395.8	NA	NA	NA	NA	NA	NA	NA	29930.6	NA	NA	NA	38548.8	NA	NA	NA	NA	26705.1	NA	49322.4	NA	NA	NA	NA	NA	25716	NA	NA	NA	35514.8	NA	NA	23468.6	NA	NA	NA	NA	NA	NA
_[Acetyl (Protein N-term)]AM[Oxidation (M)]S[Phospho (STY)]SGGSGGGVPEQEDSVLFR_.3	NA	NA	NA	NA	NA	151354	NA	NA	NA	NA	NA	NA	NA	NA	NA	NA	NA	NA	39914.2	NA	NA	NA	NA	NA	NA	NA	NA	NA	NA	NA	NA	NA	NA	NA	NA	NA	15768.6	NA	NA	74769.2	35828.2	121316	42315.1	NA	NA	NA	54435.5	NA	43260.7
_[Acetyl (Protein N-term)]AM[Oxidation (M)]SSGGS[Phospho (STY)]GGGVPEQEDSVLFR_.2	NA	NA	NA	NA	NA	NA	NA	NA	NA	NA	NA	NA	NA	NA	NA	NA	NA	NA	NA	NA	NA	NA	NA	NA	NA	NA	NA	NA	NA	NA	NA	NA	NA	NA	NA	NA	27805.7	NA	NA	NA	NA	NA	NA	NA	NA	NA	NA	NA	NA
_[Acetyl (Protein N-term)]AMALELQAQAS[Phospho (STY)]PQPEPEELLIVK_.3	NA	NA	NA	NA	NA	NA	NA	NA	NA	NA	NA	NA	NA	NA	NA	NA	NA	NA	NA	NA	NA	NA	NA	NA	NA	NA	NA	NA	NA	NA	NA	NA	NA	NA	NA	NA	NA	NA	NA	NA	NA	NA	19432.8	NA	NA	NA	28104.1	11237.8	NA
_[Acetyl (Protein N-term)]AMS[Phospho (STY)]S[Phospho (STY)]GGSGGGVPEQEDSVLFR_.3	49422.9	21441.3	45429.2	53750.2	60052.2	42661.8	50706.6	57624.6	51634.3	51423.6	51956.6	35686.3	34529.2	35896.6	31385.5	40229.9	43163.9	31739.7	36577.7	37258.9	35734.9	33207.3	45589.7	34126.8	47534.9	NA	44321.9	33550.2	18516	53498	41405.5	41240	12920.2	59024.6	NA	NA	NA	NA	63467.5	41432.5	14445.9	18434.1	29200.2	42440.8	37794.6	34422.9	69102.7	37724.6	NA
_[Acetyl (Protein N-term)]AMS[Phospho (STY)]SGGSGGGVPEQEDSVLFR_.3	33703.5	NA	26570.4	31740.8	41131.4	26147	36977	43403.1	28178.6	32751.8	27308.2	29933.6	35439.6	30826.9	26218.3	21029.5	36480.3	22777.8	25695.3	25511.4	24197.4	29290.9	28203	24578.4	35844.9	42730.3	27572.7	31489	36217.5	42722	33053.8	31442.7	36079.9	35678	24081.6	26444.7	7114.77	23877.9	43877.1	36791.6	26673.5	34569.7	28050.9	34029.6	40847.5	40857.2	57836.3	44596	26713.3
_[Acetyl (Protein N-term)]AMSS[Phospho (STY)]GGS[Phospho (STY)]GGGVPEQEDSVLFR_.3	95658.3	26188.9	51360.6	53471.2	29137.6	48898.3	45849.4	63390.8	62400.1	62145	57773.2	42421.6	36048.3	35226.9	36789.7	44107.8	46970.3	30635.9	42963.7	39754.8	42504.2	38003.5	38955.8	37831.9	52336.5	62484.9	53295.9	33325.9	26359.5	58652.2	27780.7	47010.5	15121.1	43288.2	NA	NA	NA	3197.22	65547.4	47978.1	16786.3	23583.6	34056.2	52500.4	48766	44061.8	82071.1	46373.5	NA
_[Acetyl (Protein N-term)]AMSSGGS[Phospho (STY)]GGGVPEQEDSVLFR_.2	86459	NA	53538.7	NA	NA	47162.5	NA	NA	NA	NA	71035.8	65412.8	NA	NA	NA	NA	NA	NA	85543.8	NA	NA	NA	NA	NA	59463.1	75442.7	54629.1	69816.9	76761.8	80906.9	61157.3	64847.5	NA	69954.5	NA	NA	11429.9	46636.4	NA	66623.8	47984	54073.4	60903.4	NA	78108.8	71287.1	97018.8	59734.8	36880.4
_[Acetyl (Protein N-term)]ANENHGS[Phospho (STY)]PREEASLLSHSPGTSNQSQPC[Carbamidomethyl (C)]SPK_.3	29645.8	NA	15196.1	15710.4	24069.4	12969.4	13701.3	16359.1	11720.7	14527.4	12885.8	15950.5	28477.3	27351.2	17217.6	14261.3	26523	14648.4	14337.2	16120	13814.7	NA	8694.85	12848.3	32744.7	18590.5	14050.1	9889.39	24244.7	16407.9	18264.9	15194.3	13582.7	17775.5	9040.24	10482.4	4041.88	8433.21	24813.1	19058.5	11712.5	11693.9	13862	17797	NA	11048.4	NA	15758.5	13766.3
_[Acetyl (Protein N-term)]ANNS[Phospho (STY)]PALTGNSQPQHQAAAAAAQQQQQC[Carbamidomethyl (C)]GGGGATK_.4	48238	41436.6	40740.7	34893.9	44106.3	41436.4	35769.5	38853.5	44940.3	35742.7	46113.4	32409.8	62354	69242.2	33934.4	35048.8	59694.7	43654.1	45500.6	44206.7	50693.5	42118.2	38243.4	39376.5	49419	69917.3	39920.9	35107.5	52349.4	52074.7	47437.6	42329.8	44835.4	50084.2	38421.1	37229.8	33169.6	59123.8	76028.9	75135.7	51647.3	76648.7	50671.2	65644.2	59416.1	48830.7	76296.8	46882.4	66592.6
_[Acetyl (Protein N-term)]ANNS[Phospho (STY)]PALTGNSQPQHQAAAAAAQQQQQC[Carbamidomethyl (C)]GGGGATKPAVSGK_.4	NA	NA	NA	NA	NA	NA	NA	NA	NA	NA	14302	NA	NA	NA	NA	NA	NA	NA	NA	NA	NA	NA	NA	NA	NA	NA	NA	NA	NA	NA	NA	NA	NA	NA	NA	NA	NA	NA	26368.7	NA	NA	NA	NA	NA	20130	NA	20943.6	NA	NA
_[Acetyl (Protein N-term)]ANNSPALTGNS[Phospho (STY)]QPQHQAAAAAAQQQQQC[Carbamidomethyl (C)]GGGGATK_.4	NA	44375	NA	43989.9	54792.7	50909.1	48414.9	NA	NA	51644	58938.8	41115.4	75125	78087.9	NA	41666	NA	NA	NA	50488	NA	NA	NA	52432.2	62416.9	NA	48326.3	41295.1	NA	61080.1	57089.6	51487	NA	59219.3	50246.5	NA	18841.5	63284.3	NA	NA	41918.3	NA	NA	NA	67081.2	NA	NA	55666.2	NA
_[Acetyl (Protein N-term)]AQAS[Phospho (STY)]PPRPER_.2	75769.3	NA	52299.2	44761.8	95390.7	68383.7	51174.9	85494.1	NA	NA	47148.5	NA	146715	107893	82545.3	55393.8	163920	NA	97185.2	84481.3	80981.2	NA	39783.2	NA	75465.9	73487.1	NA	52337.4	86495.8	NA	NA	61638.9	72109.5	87169.1	NA	73168.2	NA	NA	NA	NA	NA	NA	NA	NA	NA	NA	NA	NA	NA
_[Acetyl (Protein N-term)]AQVAM[Oxidation (M)]STLPVEDEES[Phospho (STY)]SESR_.3	NA	NA	NA	NA	NA	NA	NA	NA	NA	NA	NA	NA	25995.5	NA	NA	NA	NA	NA	NA	NA	NA	NA	NA	NA	NA	NA	NA	NA	NA	NA	13451.8	NA	NA	NA	NA	NA	NA	NA	NA	NA	NA	NA	NA	NA	NA	NA	NA	NA	NA
_[Acetyl (Protein N-term)]AQVAMSTLPVEDEES[Phospho (STY)]SESR_.2	426689	NA	237143	185009	304752	161118	223201	269242	255661	181329	289482	295156	741670	354463	263111	172075	581712	263826	334768	357039	252699	218160	229804	232220	518554	270519	220458	235966	486704	355890	446832	460457	314153	321399	351809	263262	25657	137752	252048	310571	188863	198908	190699	246774	167204	151363	262098	254854	316576
_[Acetyl (Protein N-term)]AQVLHVPAPFPGTPGPAS[Phospho (STY)]PPAFPAK_.3	72646	NA	39578	38829.6	NA	NA	NA	NA	NA	NA	NA	NA	NA	NA	NA	NA	65936.8	NA	NA	NA	NA	NA	NA	NA	NA	NA	NA	47167.8	61012.2	NA	NA	NA	NA	NA	NA	NA	NA	NA	NA	NA	NA	26910.4	NA	NA	NA	NA	NA	NA	23546.3
_[Acetyl (Protein N-term)]ARGS[Phospho (STY)]VSDEEM[Oxidation (M)]M[Oxidation (M)]ELR_.2	NA	NA	NA	NA	NA	31190.6	NA	NA	NA	NA	47183.2	67602.5	NA	82845	NA	23649.8	59385.5	45437.2	NA	NA	NA	45256.4	NA	49641	NA	NA	NA	NA	NA	30371	NA	NA	NA	59321.2	25420.3	24735.1	8358.04	NA	NA	NA	NA	NA	NA	NA	NA	NA	NA	NA	NA
_[Acetyl (Protein N-term)]ARGS[Phospho (STY)]VSDEEM[Oxidation (M)]MELR_.2	258157	NA	260745	226662	302660	379272	190279	355047	301593	374467	375047	1.03842e+06	413096	1.63077e+06	391026	357566	1.79901e+06	741800	292766	245953	137665	846318	204780	803095	NA	260067	226636	NA	222099	514471	NA	262572	130754	984026	261076	477266	NA	NA	NA	197420	NA	NA	134401	NA	230014	220256	NA	230675	41047.5
_[Acetyl (Protein N-term)]ARGS[Phospho (STY)]VSDEEMM[Oxidation (M)]ELR_.2	333794	NA	266365	243971	306203	379272	344281	480915	298848	374467	517410	1678849	463957	2.02644e+06	396921	413704	1.80349e+06	867925	296848	283348	247126	846318	247783	803095	NA	292931	230570	NA	261043	514471	244645	295962	271110	1.61778e+06	338714	477266	NA	170927	361423	201733	NA	176077	193329	252936	238553	228427	NA	230675	NA
_[Acetyl (Protein N-term)]ARGS[Phospho (STY)]VSDEEMMELR_.2	335340	19555	294753	348215	407522	489203	460092	757574	419293	750880	1017095	3610487	474124	3.81707e+06	618651	760866	3826683	2.08166e+06	567619	490102	312749	1.45126e+06	497454	1609812	162851	336990	311309	142327	276179	727751	267872	378489	341558	2.28951e+06	603631	672487	NA	138795	311060	202556	117397	119060	202051	181430	280569	195968	332090	377562	108280
_[Acetyl (Protein N-term)]AS[Phospho (STY)]C[Carbamidomethyl (C)]AS[Phospho (STY)]IDIEDATQHLR_.2	NA	NA	NA	NA	NA	NA	NA	NA	NA	NA	NA	NA	NA	NA	NA	NA	NA	NA	NA	NA	NA	NA	NA	NA	NA	NA	NA	NA	NA	NA	NA	NA	NA	65794.9	60274.4	87383.7	NA	NA	NA	NA	NA	NA	NA	NA	NA	NA	NA	NA	NA
_[Acetyl (Protein N-term)]AS[Phospho (STY)]ES[Phospho (STY)]DTEEFYDAPEDVHLGGGYPVGSPGK_.3	19666	8175.77	54655.5	44464.2	42727.2	29303	30674.1	44321.1	45075.9	49201.4	52084.8	43580.6	55981.6	59246.2	52675.9	49863.9	NA	46325.7	49270.5	48462.9	55900.5	37998.1	51697.8	35409.4	51947.3	NA	45531	41356.5	NA	23807.5	40146.3	44560.8	11613.8	23427.3	11833.3	17640	NA	NA	53453.6	NA	NA	NA	11493.4	26744.7	14680.3	37846.2	54542	37451	12545.2
_[Acetyl (Protein N-term)]AS[Phospho (STY)]GADSKGDDLSTAILK_.3	2081.11	NA	NA	2537.36	2025.19	NA	2526.12	2452.36	NA	NA	NA	2970.13	2946.16	5609.58	NA	NA	3741.71	NA	2835.6	1831.11	NA	NA	1870.68	1813.15	5089.25	3377.01	NA	3152.14	2548.95	3438.59	3622.92	NA	3672.15	6651.74	5220.39	4621.32	NA	NA	NA	2469.78	NA	NA	NA	NA	NA	NA	3734.47	NA	NA
_[Acetyl (Protein N-term)]AS[Phospho (STY)]GVAVSDGVIK_.2	24104596	551730	16748217	26176080	38844240	24894918	14226398	22748496	21483592	18480678	26390190	31535548	29957104	27060972	16388536	22509216	40183576	41212036	24069132	31127574	26800586	18836468	16603943	17887062	38532816	24713166	16662992	25824874	60666584	35746080	33825696	39504576	37907984	37866128	30888574	35394172	43213872	42757988	45055972	39666200	37445548	55509480	38202736	46885956	33882860	36013676	55459876	40406924	46510660
_[Acetyl (Protein N-term)]AS[Phospho (STY)]GVQVADEVC[Carbamidomethyl (C)]R_.2	426249	17371.1	263508	299917	592660	288131	252732	291175	226499	184006	265273	250515	345855	303788	220091	213979	372066	377995	313447	419490	263162	172286	161501	140652	554451	257455	239639	239343	953679	400424	502597	451118	419874	334007	294536	254633	419526	479470	403157	425954	391437	680655	405857	545249	269983	296936	460343	361753	580288
_[Acetyl (Protein N-term)]AS[Phospho (STY)]GVTVNDEVIK_.2	NA	NA	NA	NA	NA	NA	NA	NA	NA	NA	NA	NA	NA	NA	NA	NA	NA	33010.8	NA	NA	13501.8	NA	NA	NA	NA	NA	NA	NA	NA	15173.8	NA	NA	NA	30928.5	19720.4	NA	NA	NA	NA	NA	NA	19293	NA	NA	NA	NA	NA	NA	9174.03
_[Acetyl (Protein N-term)]AS[Phospho (STY)]LEVSRS[Phospho (STY)]PR_.2	58724.1	NA	51455.8	NA	NA	37402.5	NA	NA	NA	NA	NA	NA	NA	67761.7	49821.6	33211.8	NA	NA	93652.2	28229.4	63911.1	72126.8	23056.3	62946.9	NA	NA	NA	NA	NA	NA	NA	27515.8	54100	NA	NA	NA	NA	NA	NA	32788	NA	34604.7	NA	NA	NA	NA	59933.5	54234.1	NA
_[Acetyl (Protein N-term)]AS[Phospho (STY)]LEVSRS[Phospho (STY)]PRR_.3	12760.3	3069.45	13224.5	6355.82	10552.3	9403.53	20172.6	15609.9	16617.5	13816	14395.2	11785.8	15384.3	31015.9	16930.1	8211.62	17718.3	12005.2	36313.7	20110.2	26647.1	48167.3	13432.9	21295.3	13517.4	9527.96	12651.1	6955.57	10352.7	12961.3	8308.05	12205.1	17756.7	15882.1	13768	11116.4	NA	3463.69	11989.3	NA	4179.11	12723.3	NA	9871.25	11921.3	17034.2	24655.5	16763	6970.59
_[Acetyl (Protein N-term)]AS[Phospho (STY)]LSLAPVNIFK_.2	NA	NA	NA	25447.9	33216.7	13152.4	17029.1	5038.45	NA	4970.99	5056.04	22699.6	NA	19729.3	NA	14794.5	NA	NA	5283.44	22262.5	NA	NA	2701.32	16512.2	NA	NA	27870.5	14526.1	23833.8	NA	7699.14	NA	20625.4	NA	10342.1	43625.8	NA	NA	NA	6647.96	4079.51	4040.04	16039.3	NA	13836.3	11953.1	15179.7	11628.8	NA
_[Acetyl (Protein N-term)]AS[Phospho (STY)]PEHPGS[Phospho (STY)]PGC[Carbamidomethyl (C)]MGPITQC[Carbamidomethyl (C)]TAR_.3	121768	90667.6	78904.8	84572.3	110188	90146.3	83214.3	87981.2	73665.5	55158.7	74691.8	68160.2	158197	194377	127743	97690.5	171367	122856	123935	110889	114902	91070.5	81863.9	76654.8	128529	163640	88894.6	72150.5	137131	140775	123137	134023	132610	167046	103152	95201.5	39670.5	111719	177478	165086	98864.4	140770	111420	132768	145468	113229	180489	100443	162266
_[Acetyl (Protein N-term)]AS[Phospho (STY)]PEHPGSPGC[Carbamidomethyl (C)]M[Oxidation (M)]GPITQC[Carbamidomethyl (C)]TAR_.3	NA	NA	NA	NA	NA	NA	NA	NA	NA	NA	NA	NA	NA	NA	NA	NA	NA	NA	NA	NA	NA	NA	NA	NA	NA	NA	NA	NA	NA	NA	NA	NA	NA	NA	NA	NA	47620.4	NA	NA	328227	55934	NA	NA	NA	NA	NA	NA	NA	268183
_[Acetyl (Protein N-term)]AS[Phospho (STY)]PEHPGSPGC[Carbamidomethyl (C)]MGPITQ[Deamidation (NQ)]C[Carbamidomethyl (C)]TAR_.3	93136.1	NA	NA	NA	NA	NA	NA	NA	NA	NA	NA	NA	118660	115380	59657.5	NA	170310	NA	79875.1	70027	NA	54107.7	NA	46103.1	100991	74848.3	NA	NA	132908	81713.3	72490.6	70440	82078.8	69283.2	49733.4	NA	50136.2	91231.6	110228	97525.4	76741	89184.6	81138.3	106077	61698.5	61254.8	NA	NA	96528.8
_[Acetyl (Protein N-term)]AS[Phospho (STY)]PEHPGSPGC[Carbamidomethyl (C)]MGPITQC[Carbamidomethyl (C)]TAR_.3	208181	NA	118382	111161	176856	99851.8	108137	118461	97363.8	75973.5	71464.8	87654.3	271507	277256	153361	135025	384034	160684	163741	163068	141891	125810	93945.1	94522.6	230896	171443	100141	107108	322624	191850	178850	189887	190048	150588	99516.6	101528	122745	238182	274361	252256	181648	216827	198824	249846	142778	144679	171322	138882	250531
_[Acetyl (Protein N-term)]AS[Phospho (STY)]PGIEVELLGK_.2	NA	NA	NA	NA	NA	NA	3858.67	NA	NA	NA	NA	NA	NA	NA	NA	NA	NA	NA	2366.25	NA	3817.41	2998.26	NA	NA	NA	NA	NA	1903.42	NA	NA	NA	NA	NA	NA	NA	NA	NA	NA	NA	NA	NA	NA	NA	NA	2244.83	NA	NA	NA	NA
_[Acetyl (Protein N-term)]AS[Phospho (STY)]PPAC[Carbamidomethyl (C)]PSEEDESLK_.2	149648	NA	89080.4	87938.3	144027	104613	102584	115105	90601.2	78035.7	70916.2	64449.1	176573	188946	109371	95131.5	181652	96672.4	113599	118962	145773	109384	90747.7	110283	181734	162574	97095.1	78105.9	87195.8	85830.1	NA	62496	100584	82951	NA	NA	93436.2	197828	299769	235935	239592	280641	269742	260705	184020	207870	223234	165648	357534
_[Acetyl (Protein N-term)]AS[Phospho (STY)]PQ[Deamidation (NQ)]GGQIAIAMR_.2	38300.1	NA	NA	21412.9	36703.5	41873.3	27213.1	30618.6	44546.8	28862.4	39238.9	30008.5	28636	36850.5	21288.6	14992.6	NA	31506.4	26317.4	29095.2	NA	32886.4	22445.3	24662.8	49229.6	NA	23543.9	20847.5	39105.6	45277.5	25062.4	25685.2	24809.1	NA	23090.7	27057.7	13714.5	37085.6	46735.9	45677.9	33065.5	58125.1	34656.5	47142.7	49106.9	47983.8	54733	48448.5	27680.3
_[Acetyl (Protein N-term)]AS[Phospho (STY)]PQGGQ[Deamidation (NQ)]IAIAMR_.2	31854.2	NA	NA	NA	NA	31889.7	NA	27996	26363.7	22285.9	29664.7	23903.9	24518.7	27098	NA	NA	NA	26803.3	25810.7	25209.6	NA	24484.2	22540.4	21035.4	NA	NA	19249.5	19835.1	31369.3	NA	NA	23493.7	NA	NA	18347.4	25771.7	10773.4	26791	31754.6	34501.8	22794.4	43339.3	26375.9	40152.4	37296.9	30570.1	42023.9	35503.4	NA
_[Acetyl (Protein N-term)]AS[Phospho (STY)]PQGGQIAIAMR_.2	31396.9	NA	19288.4	20886.3	36557.5	34813.4	26919.7	29800.5	NA	21796.9	35130.1	28308.2	31520.8	NA	19072.7	15973.3	43895	30446.9	23904.6	26094.5	36405.9	28711.1	23444	25449.6	35073.5	42041.8	17695.7	22407.3	41110.8	38217.9	23640.3	25776.4	32002.3	43523.8	21935	29645	12165.9	28187.1	33594.8	39670.1	28523.3	47678.9	31906.5	42323.7	51857.4	38816.9	53143.9	42473.6	24150.7
_[Acetyl (Protein N-term)]AS[Phospho (STY)]PSLERPEK_.2	344891	NA	282400	237843	421768	271368	323991	401876	322997	236982	302288	294085	409297	333870	283393	194151	419718	244150	304403	294961	393988	326968	216153	312525	346774	257884	233504	270951	346015	215445	241762	259885	207643	199608	142125	180873	103029	146784	304192	245484	204465	232636	241399	264499	275510	236217	318642	295257	NA
_[Acetyl (Protein N-term)]AS[Phospho (STY)]SSGNDDDLTIPR_.2	21532	NA	NA	NA	27828.1	22762.2	18954.1	17844	25087.1	NA	19765.4	NA	23952.5	27487.5	NA	NA	NA	NA	22299.7	27133.1	27037.2	16694.7	17395.3	NA	31228.1	38315.6	18521.7	NA	25999.9	20023.3	NA	27722.6	38833.1	40235	23340.9	37998.1	13665.9	28933.2	41185.9	31325.5	19097.6	34057.6	25677.3	29142.8	18370.4	25932	36179	30662.1	31092.8
_[Acetyl (Protein N-term)]AS[Phospho (STY)]VGEC[Carbamidomethyl (C)]PAPVPVK_.2	NA	NA	NA	NA	NA	58364.5	NA	NA	NA	NA	NA	NA	NA	NA	NA	NA	NA	NA	61118.2	NA	NA	NA	NA	NA	NA	70069.8	NA	NA	98673.4	63627.4	NA	NA	62858	NA	31482.4	NA	13118.6	NA	NA	NA	NA	58369	NA	67871.5	NA	NA	72144.4	NA	68978.9
_[Acetyl (Protein N-term)]ASAVS[Phospho (STY)]PANLPAVLLQPR_.2	220662	NA	43404.2	97134.7	90546.3	183426	165703	240925	NA	177144	252330	71150.2	66169.9	NA	125139	35472	81514.7	37399	93228.5	174930	NA	84717.5	NA	101893	25829	23315.6	104451	241045	317366	23493.8	198696	30567.8	42444.1	NA	164374	137850	5528.84	NA	NA	218042	117891	NA	172540	96141.5	108224	NA	160044	213069	NA
_[Acetyl (Protein N-term)]ASC[Carbamidomethyl (C)]AS[Phospho (STY)]IDIEDATQHLR_.2	187247	NA	96000.3	147050	211510	184986	136286	168507	NA	109133	NA	NA	172410	NA	152935	NA	286230	134952	168852	189393	130788	126458	NA	NA	219494	194900	141529	149940	144449	138735	132124	NA	163973	124058	76669.5	84330.2	39749.8	124744	143419	131859	126283	118261	135047	130120	115410	173421	131481	170864	146380
_[Acetyl (Protein N-term)]ASC[Carbamidomethyl (C)]ASIDIEDAT[Phospho (STY)]Q[Deamidation (NQ)]HLR_.2	NA	NA	NA	NA	NA	NA	NA	NA	NA	NA	NA	NA	NA	NA	NA	NA	NA	NA	NA	NA	NA	17326.8	NA	NA	NA	126910	NA	NA	NA	NA	NA	NA	37073.1	45242.1	NA	NA	NA	NA	NA	NA	NA	NA	NA	NA	NA	NA	NA	NA	NA
_[Acetyl (Protein N-term)]ASEAPS[Phospho (STY)]PPRS[Phospho (STY)]PPPPTSPEPELAQLR_.3	102138	23579.1	66241.1	95346.8	126479	87254.8	92707.1	95487	95181	NA	90607.8	88564.1	NA	107816	NA	79810.8	141254	77180.7	93681.2	92323.7	77335.5	86946.1	75151.6	89059.2	110953	116500	73039.6	86358.3	102669	89679.4	77908.7	77390.6	83012.9	94610.8	75813.4	72705.7	39545.6	103404	112457	119085	79637	135492	103531	104168	132069	108951	151333	116357	109360
_[Acetyl (Protein N-term)]ASES[Phospho (STY)]DTEEFYDAPEDVHLGGGYPVGS[Phospho (STY)]PGK_.3	59725.8	24696.5	49323	52168.7	42177.6	61485.4	44399.4	60790.3	57827.4	47862.5	55260.1	39014.6	63648.7	86807.6	62411.8	57254.2	51966.8	42332.1	61985.9	55486.4	63463.9	50550	56484.5	45725.8	44250.4	NA	51760.6	46576.3	28020.3	38530.5	38710.6	42390.3	30790.9	29790.4	36151.6	34451.2	NA	15107.2	71842.6	51354.4	37633.7	35045.1	45375.8	44660.6	60236	67394.1	77879.6	47296.1	34957.4
_[Acetyl (Protein N-term)]ASES[Phospho (STY)]DTEEFYDAPEDVHLGGGYPVGSPGK_.3	154722	NA	102692	119524	182731	111537	108480	107322	114213	120883	140158	142299	175620	186905	153149	122684	218384	194176	133866	166384	141378	149989	118559	140362	157798	70222.4	97576	118913	225154	187788	163561	173941	160772	116020	143126	133584	NA	88744	206791	166555	166802	155592	187533	182867	131928	95988.3	182613	165379	167617
_[Acetyl (Protein N-term)]ASESS[Phospho (STY)]PLLAYR_.2	11668.8	NA	4322.04	7693.43	15096.8	9254.59	8186.27	11453	NA	NA	NA	11378.9	27056.6	20928.3	9137.13	8838.15	21077.5	11561.8	11225.6	13264	17112	15603.6	11211.9	15700.3	14194.7	8974.04	NA	7683.73	15152.7	8073.33	7998.23	NA	13333.7	16553.2	NA	8921.04	8840.79	13131.5	15529.7	13958.3	11362.8	14128.8	14802.5	18410.6	16406.1	13705.4	19491.5	18285.9	43001.4
_[Acetyl (Protein N-term)]ASFVTEVLAHS[Phospho (STY)]GRLEK_.3	NA	NA	NA	NA	NA	NA	NA	NA	2779.48	NA	NA	NA	NA	4151.24	NA	3185.91	8143.6	NA	NA	NA	NA	NA	NA	NA	NA	NA	NA	NA	4414.1	2126.54	NA	NA	NA	NA	NA	NA	NA	1899.08	5458.56	NA	NA	NA	3163.35	4313.15	NA	NA	4310.2	4573.33	NA
_[Acetyl (Protein N-term)]ASGEHS[Phospho (STY)]PGSGAAR_.2	NA	NA	53289.2	NA	NA	33354.5	NA	24769.6	24322.2	NA	28152.5	31653.4	NA	41360.5	17165.6	NA	25464.4	NA	28162.8	22236.6	68815.5	27534.6	NA	44571	NA	40010.4	55649.4	21820.1	31473.8	32792.1	42636.7	63309	105063	54351.6	50980.7	55992.3	111182	103809	NA	46894.4	161281	108244	169864	143149	150406	77565.4	47893.4	128492	196024
_[Acetyl (Protein N-term)]ASHLRPPS[Phospho (STY)]PLLVR_.3	435026	NA	161705	216311	686566	157722	227695	254316	122449	101503	116987	164287	615868	299452	189845	194143	898410	208115	201704	258032	199668	156029	124680	186999	599720	173152	146987	260926	583584	151142	208901	228865	181620	159871	127672	174503	116472	174792	210118	181180	163994	217915	177438	164155	131730	130729	147495	148286	138555
_[Acetyl (Protein N-term)]ASLEVSRS[Phospho (STY)]PR_.2	1437891	13476.2	1.01235e+06	1.08488e+06	2.11155e+06	1.0496e+06	1224991	1.61062e+06	1.12854e+06	800753	946872	933766	2.54293e+06	1.6092e+06	1385353	1.09537e+06	2.62187e+06	1.17949e+06	1323670	1.37958e+06	1.75119e+06	1.18811e+06	1.05135e+06	1.32807e+06	1.83585e+06	1.08418e+06	937473	1.03177e+06	1.50561e+06	923084	1.07607e+06	1.11821e+06	970834	918309	645791	878575	454907	777375	1.81237e+06	1.18481e+06	918502	1.11967e+06	1.23581e+06	1486697	1.11691e+06	1.21061e+06	1.34786e+06	1.45477e+06	1.10642e+06
_[Acetyl (Protein N-term)]ASLEVSRS[Phospho (STY)]PRR_.2	47328.6	NA	29177.1	25283.7	65326	25854.8	33479.1	53976.7	33814.3	21810.1	36288.4	31607.1	73371	62156	34355.4	23568.7	93480.4	35239.9	37346.8	39049.7	47563.9	41199.4	29238.3	42381	53748.2	30292.5	25924.9	25485.8	46547.1	24303.5	23853.5	28212.7	19621.8	26097.5	15970	17706.5	6378.1	16317.7	49847	30989.3	23813.3	22955.7	39601.2	34290.8	38246.4	32104.6	43964	40085.3	29077.2
_[Acetyl (Protein N-term)]ASLGPAAAGEQASGAEAEPGPAGPPPPPS[Phospho (STY)]PSSLGPLLPLQR_.4	66267.8	NA	36368.8	NA	NA	NA	26124.1	65087.7	16173.5	63700.3	42332.7	NA	64461.2	NA	50350.4	NA	49877.6	30651.8	34981.9	NA	23616.5	41165.2	NA	NA	32664.7	31534.3	NA	30891.9	30628.8	17333.4	23395.4	19570	NA	NA	36509.7	NA	5572.94	NA	NA	33502.5	NA	NA	NA	19012.5	20489.7	NA	NA	37563.1	NA
_[Acetyl (Protein N-term)]ASNSWNASSS[Phospho (STY)]PGEAREDGPEGLDK_.3	86515.6	NA	87853.8	83106.2	90434.5	76450	73718.3	83939.9	80053.8	69579.5	82769	96999.1	63218.8	67072.8	39319.5	34109.6	83930.2	37175.8	44905.7	43601.8	43779.8	43915.4	31463.2	52905.5	111106	118404	82713.3	86441.8	89365.9	97735.2	86230.7	75478.1	52919.2	64559.9	66793.4	49081	27194	85899.3	85519.5	74592.7	61639.9	77671.6	85006.3	109572	86147.5	62802.6	87756.4	121946	34720.6
_[Acetyl (Protein N-term)]ASPEHPGS[Phospho (STY)]PGC[Carbamidomethyl (C)]MGPITQC[Carbamidomethyl (C)]TAR_.3	208181	NA	118382	111161	176856	99851.8	108137	118461	97363.8	75973.5	71464.8	87654.3	271507	277256	153360	135025	384034	160684	163741	163068	141891	124428	93945.1	94522.6	230896	171443	100141	107108	322624	191850	178850	189887	190048	150588	99516.6	101528	122745	238182	274361	252256	181648	216827	198824	249846	142778	144679	171322	138882	250531
_[Acetyl (Protein N-term)]ASQLQVFS[Phospho (STY)]PPSVSSSAFC[Carbamidomethyl (C)]SAK_.3	27881.4	NA	10900.6	NA	25553.9	18484.9	14054	14977.1	NA	9068.37	NA	8440.63	36245.6	26171.7	20850.7	12494.2	NA	NA	12920.4	17637	15852.9	NA	12982.7	NA	20653.9	NA	NA	10026.4	27059.4	18039.9	12015.7	17184.1	13789.3	13768.7	NA	NA	NA	4464.12	19443.1	17932.8	12336.6	12076.1	7743.17	NA	9091.96	8345.22	NA	11680.5	5019.63
_[Acetyl (Protein N-term)]ASQS[Phospho (STY)]QGIQQLLQAEK_.2	29738.6	9744.48	29132	21806.6	34917.2	NA	18756.6	33363.2	NA	17579	23000.9	18179.6	29312.4	37339.3	28028.3	NA	41316.8	23604.4	29854	25739.5	25858.1	15711.5	NA	16487.9	27413.6	20143.8	26969	22195.2	33674.6	27044.5	27136.9	37304.8	58098.7	31900.2	48074.6	46886.9	4066.73	13296.3	NA	NA	14187.5	20525	19914.5	NA	NA	21897.2	24875.6	NA	16536.2
_[Acetyl (Protein N-term)]ASS[Phospho (STY)]DIQVK_.2	NA	NA	NA	NA	NA	NA	NA	NA	NA	NA	NA	NA	NA	NA	NA	NA	NA	NA	NA	NA	NA	NA	NA	NA	NA	NA	NA	NA	NA	5232.29	NA	NA	8914.04	NA	NA	NA	NA	NA	NA	NA	NA	NA	NA	6580.23	4213.3	NA	7529.22	NA	NA
_[Acetyl (Protein N-term)]ASS[Phospho (STY)]HSSSPVPQGSSSDVFFK_.3	NA	NA	NA	48618.9	82916	56135.3	48487.6	67583.9	42466	57177.3	53111.6	77656.2	89492.4	74909.9	57425.3	NA	64134.7	39940.4	NA	36032.6	36300.7	54694.5	38429.6	67321.8	34419.2	32221.3	NA	NA	45809.4	45104.8	36936.2	54550.8	56111.8	87880.5	62658.4	76338.4	18924.7	28063.6	NA	34979.2	23362.9	36816.9	33098.8	31296.8	28462.6	29454.4	45867.3	38953.7	33170.8
_[Acetyl (Protein N-term)]ASS[Phospho (STY)]LN[Deamidation (NQ)]EDPEGSR_.2	96630.3	NA	NA	NA	NA	NA	NA	NA	NA	NA	NA	NA	NA	108141	76414.4	NA	NA	NA	143245	NA	82993.5	108846	NA	NA	113605	NA	NA	NA	150369	111885	NA	NA	192055	197640	178968	219720	NA	28367.8	NA	NA	NA	NA	NA	NA	NA	NA	NA	NA	41328.3
_[Acetyl (Protein N-term)]ASS[Phospho (STY)]LNEDPEGSR_.2	130724	NA	105716	121252	119793	98598	133963	NA	90182.2	94293.1	124387	121827	129953	123634	97876.9	NA	137799	91856.8	177716	138136	99367.8	140250	93879.7	105083	136411	98996	109135	104627	176540	126170	138689	158565	226020	235195	210873	249453	19721.1	40666.4	NA	65489.5	43504.1	66453.9	67249.9	53985.8	NA	64031.9	88823.3	73034	47377.6
_[Acetyl (Protein N-term)]ASSHSSS[Phospho (STY)]PVPQGSSSDVFFK_.3	49518.1	NA	29034.5	48618.8	64306.5	59507	45612.6	64802.1	43438	54161.5	49094.2	63653.6	NA	NA	57302.6	40590.5	63666.9	37216.5	NA	35225.7	36300.7	55609.8	42157.3	65137.2	NA	NA	NA	NA	49279.2	41328.4	34522.2	42765.9	53537.8	63790.6	58418.8	75544.9	18924.7	26990.7	NA	30775.1	NA	33631.3	30178.3	31296.8	28919.3	32864.7	45206.2	38953.7	31907
_[Acetyl (Protein N-term)]ASSTVPVSAAGS[Phospho (STY)]AN[Deamidation (NQ)]ETPEIPDNVGDWLR_.3	NA	NA	NA	45584.2	56317.7	45042.6	69141	31721.4	NA	36936.2	30644.2	49301.5	NA	NA	NA	27338.7	NA	NA	40365.2	42566.4	NA	NA	NA	47399.3	NA	NA	NA	43951.1	37579.7	NA	NA	NA	NA	25213.1	48318.2	54520.2	NA	NA	NA	44195.7	21987.4	29379.8	55810.1	NA	50818.8	43973.8	NA	61612.2	NA
_[Acetyl (Protein N-term)]ASSTVPVSAAGS[Phospho (STY)]ANETPEIPDNVGDWLR_.3	NA	NA	NA	45054.4	55651.2	48322.3	69259.8	31721.5	26900.1	36936.2	30644.2	49301.5	NA	NA	26916.4	26312.9	NA	NA	37023.4	40248.8	NA	NA	NA	NA	NA	NA	66121.7	43951.1	35367.7	19397.1	52849.2	NA	42867.1	57414.3	48318.2	54520.2	5212.52	NA	NA	44195.7	18917.4	NA	54605.2	NA	50623	43903.5	66567.6	61612.2	NA
_[Acetyl (Protein N-term)]ASSTVPVSAAGSANET[Phospho (STY)]PEIPDNVGDWLR_.3	NA	NA	NA	45584.2	56046.9	48506.5	69141	33970.8	33404.9	87679.7	32554.1	49374.2	NA	NA	NA	26591	NA	NA	40672.1	38121.4	NA	NA	NA	63529.8	80113.6	19335.5	66121.7	45281.4	34043.9	39055.3	53649.1	NA	46658.8	37492.4	50956.4	55048	5212.54	16645.8	NA	44471.8	20588.3	NA	54674.9	NA	50818.8	43903.5	66567.6	61612.2	NA
_[Acetyl (Protein N-term)]ASYFDEHDC[Carbamidomethyl (C)]EPS[Phospho (STY)]DPEQETR_.3	50402.2	NA	61405.6	NA	103444	55528.5	60839.7	93860.8	NA	NA	NA	NA	NA	114973	NA	NA	NA	NA	NA	NA	NA	NA	41391.4	73257.9	NA	NA	54105.3	61081	NA	NA	NA	NA	NA	NA	NA	NA	NA	58031	NA	76329.5	63093.4	89577.8	94318.2	76997.5	73896.4	61760.4	88714.9	61486.4	47301.1
_[Acetyl (Protein N-term)]AT[Phospho (STY)]PDAGLPGAEGVEPAPWAQLEAPAR_.3	NA	NA	NA	NA	37443.9	NA	NA	NA	NA	NA	NA	NA	NA	NA	NA	NA	NA	NA	NA	NA	NA	NA	NA	NA	NA	NA	NA	NA	NA	NA	NA	NA	NA	NA	NA	NA	NA	NA	NA	NA	43766.8	NA	NA	NA	NA	NA	NA	NA	NA
_[Acetyl (Protein N-term)]ATAAETS[Phospho (STY)]AS[Phospho (STY)]EPEAESK_.2	72317.9	19211.1	58734.4	52077.2	60408.7	53475.6	62897.7	63824.7	75024.9	39435.2	52184.9	53440.9	68751.9	78076.4	68089.4	45683.3	51998.2	41708.7	55918.2	44540.7	81109.3	56561.1	41868.6	53163.1	61191.8	82569.5	59650.8	61044.6	27302	35958.1	30606	28290.4	25442.7	60482.6	24746	28637	NA	NA	132105	102490	43490.4	34191.1	50907.3	73971.9	116412	92117.1	116298	88028	NA
_[Acetyl (Protein N-term)]ATAAETSAS[Phospho (STY)]EPEAESK_.2	120006	NA	85697.7	94823.4	113862	99427.3	101489	127855	97655.9	80257	102237	106747	141906	122734	101992	75284.4	124165	82946.8	103504	87363.7	119503	87021.3	80484.8	108658	122789	117984	76301.4	95157.8	93477.7	70887.9	83987	84406.9	89854.6	86777.3	76011.8	77990.1	48097.5	89619	145254	131453	97112.4	102502	104118	125022	121642	110926	151107	112603	93344.9
_[Acetyl (Protein N-term)]ATAT[Phospho (STY)]PVPPR_.2	NA	NA	NA	NA	60880.7	NA	12394	22795.2	NA	NA	11765.1	23160.2	NA	NA	NA	NA	71450.1	9836.54	NA	NA	NA	NA	3586.23	NA	41478.8	43766	13079.3	NA	NA	NA	NA	NA	NA	NA	NA	NA	6427.22	NA	32699.3	NA	26465.4	31577.9	52968.6	41059	51856.1	NA	NA	34342.8	NA
_[Acetyl (Protein N-term)]ATDELATKLS[Phospho (STY)]R_.2	NA	NA	NA	NA	NA	NA	NA	NA	NA	NA	NA	NA	NA	NA	NA	NA	50357.7	NA	NA	NA	NA	NA	NA	NA	NA	57688.6	NA	NA	NA	NA	NA	NA	NA	NA	NA	NA	NA	NA	NA	NA	NA	NA	NA	NA	NA	NA	NA	NA	NA
_[Acetyl (Protein N-term)]ATDTS[Phospho (STY)]QGELVHPK_.2	54473.5	NA	32441.7	27194.9	62598.7	26041.5	31230.7	30018.6	21397.5	21938.9	28482.4	39799.4	69029.6	51649.2	29704.7	27877.2	96419.5	71140.5	76189.3	55112.2	40554.6	35209.5	24367.8	33066.6	70226	41581.6	27187.9	29771.9	127619	60356.8	77734.6	68674.5	177769	165720	135415	166021	15260.7	22678.3	33113.8	28862.6	20889.2	31401.1	21118.7	28326.7	22450	19372.4	35819.9	30991.5	31359.9
_[Acetyl (Protein N-term)]ATEAQS[Phospho (STY)]EGEVPAR_.2	NA	NA	NA	NA	NA	NA	50790.4	NA	NA	NA	NA	NA	NA	NA	NA	NA	NA	NA	NA	NA	45020	41210.7	NA	NA	NA	NA	NA	NA	NA	NA	NA	NA	NA	NA	NA	NA	NA	NA	56082.6	NA	NA	NA	NA	NA	47196.7	43933.9	72385.5	NA	NA
_[Acetyl (Protein N-term)]ATEIGS[Phospho (STY)]PPR_.2	260212	NA	185057	222779	327793	281101	327415	361316	222480	130033	149982	338865	261234	207939	151347	131446	268168	159046	219237	214243	292293	234439	151804	228193	276613	229996	199101	235314	148951	119951	127785	122234	112020	120578	82840.1	99718.3	67758.7	126367	250862	176854	178064	200654	202879	240451	242072	247537	269774	280771	108335
_[Acetyl (Protein N-term)]ATEPPS[Phospho (STY)]PLRVEAPGPPEMR_.3	35460.7	NA	17299.7	30757	39824.3	NA	29980.2	NA	NA	NA	NA	21768	34805.2	NA	21316.1	NA	45942.6	20120	18115.2	21917.8	NA	16486.9	NA	15396.6	37287.6	NA	18404.1	18297.7	30687.4	29541	19146.1	NA	14217.9	25546.3	12831.4	15862	8001.23	14912.6	32137.6	20331.8	13247.2	14680.9	13912.2	18759.9	NA	16616.6	28552.6	24874.9	12830.6
_[Acetyl (Protein N-term)]ATGGGPFEDGMNDQDLPNWS[Phospho (STY)]NENVDDRLNNMDWGAQQK_.4	NA	NA	NA	NA	NA	NA	NA	NA	NA	NA	NA	NA	NA	NA	NA	NA	NA	NA	NA	NA	NA	NA	NA	NA	NA	NA	NA	NA	NA	NA	NA	NA	NA	NA	NA	NA	NA	NA	NA	NA	NA	NA	NA	NA	NA	9921.88	NA	NA	NA
_[Acetyl (Protein N-term)]ATPLAVNSAAS[Phospho (STY)]LWGPYK_.2	NA	NA	26027.5	NA	NA	NA	23900.4	NA	NA	NA	NA	NA	NA	NA	NA	NA	NA	NA	NA	NA	NA	NA	NA	NA	NA	NA	NA	15005.1	NA	NA	NA	NA	NA	NA	NA	16998.3	NA	NA	NA	NA	17858.8	NA	17446.7	NA	NA	NA	NA	NA	NA
_[Acetyl (Protein N-term)]ATSATS[Phospho (STY)]PHAPGFPAEGR_.2	NA	NA	NA	NA	117285	55289.3	51290.3	83665.8	NA	NA	78964.2	82473	65969.1	NA	NA	NA	NA	NA	NA	57142.5	NA	NA	NA	NA	42181.1	52065.2	NA	NA	92961.5	NA	63182.9	NA	NA	77459.8	NA	NA	NA	NA	NA	NA	NA	NA	NA	NA	43784.5	NA	49260.4	26163.4	NA
_[Acetyl (Protein N-term)]ATTATMATSGS[Phospho (STY)]AR_.2	149960	5641.39	115499	149760	320257	247425	270087	322722	219148	227751	208197	186943	220463	162478	104250	129796	210404	131502	208461	189588	294118	217088	211887	228646	241751	187320	109298	138792	198519	113926	151251	140375	274386	348642	252206	280589	49069.3	101151	218140	162235	144912	182953	190166	233805	323637	304891	381640	338152	101242
_[Acetyl (Protein N-term)]AVETLS[Phospho (STY)]PDWEFDRVDDGSQK_.3	NA	NA	NA	NA	NA	NA	NA	NA	NA	NA	NA	NA	31034.2	39125.2	NA	NA	NA	NA	NA	NA	NA	NA	NA	NA	NA	NA	NA	NA	NA	NA	NA	NA	NA	NA	NA	NA	NA	NA	NA	NA	NA	NA	NA	NA	NA	NA	NA	NA	NA
_[Acetyl (Protein N-term)]AY[Phospho (STY)]AYLFK_.2	13682.9	NA	5439.6	7005.89	5915.88	4440.75	6376.03	7993.87	4876.77	4881.84	8284.57	3557.92	17828.5	8223.66	10420.3	6338.64	9026.26	3920.59	6162.4	6837.17	4232.37	4375.63	6221.83	5204.3	8750.23	3439.94	4891.07	5938.01	5436.33	3554.68	4835.3	6144.28	4031.73	2932.31	4095.68	4970.71	NA	NA	2631.69	2644.44	NA	NA	NA	NA	NA	NA	2001.84	NA	NA
_[Acetyl (Protein N-term)]C[Carbamidomethyl (C)]NT[Phospho (STY)]PTYC[Carbamidomethyl (C)]DLGK_.2	87099.7	NA	85393.4	44438.1	97723.7	49250.5	88654.7	NA	45180.9	NA	NA	NA	99355.2	80116.3	43843.8	42342.2	129874	34883.8	NA	62072	89756.9	89533.3	NA	NA	112143	58013.6	41716.2	28410.9	80295.5	51789.2	62425.8	61196.6	45052.6	140839	NA	NA	35770.6	30323.3	59598.1	47350.4	42483.5	NA	44024.2	NA	69172.1	NA	NA	146257	49903.9
_[Acetyl (Protein N-term)]DDDIAALVVDN[Deamidation (NQ)]GS[Phospho (STY)]GMC[Carbamidomethyl (C)]K_.2	38290.4	NA	30142.1	35857.2	39914.7	30103.8	32632.5	41682.3	33396.3	NA	33411.7	27276	35382.5	47549.2	30031.2	39809.2	44882.6	33430.7	38803.7	32961.2	35694	35253.4	38917.9	23773.9	46165.6	49718	32278.7	33333	54504.1	50358.9	43091.8	43685.3	118119	121327	93876.2	89338.9	5790.73	30454	NA	42798.9	25657.5	30125.6	24384.7	25802.3	41756.9	28671.1	43272.7	37141.7	24151.6
_[Acetyl (Protein N-term)]DLFGDLPEPERS[Phospho (STY)]PR_.2	65631.9	NA	44235.3	49145.5	92637.3	52570.3	63894.3	72911.4	52598	48165.7	53746.3	48686.1	80211.7	76198.8	60975.4	45127.8	87347	53192.1	52883.4	53227.3	47555.6	46591.6	43447.5	45719.6	74347.6	61569.7	41650.6	45599.2	52452.1	59291.6	48818.9	39317.2	41427.8	57387.3	33670.4	36978.6	14803.4	48778.4	65909.2	63464.1	36415.9	55153.6	NA	56925.4	65541.5	56845.4	57085.8	62004.7	51895.9
_[Acetyl (Protein N-term)]EEEIAALVIDNGS[Phospho (STY)]GMC[Carbamidomethyl (C)]K_.2	NA	NA	NA	NA	NA	NA	NA	NA	NA	NA	NA	NA	NA	NA	NA	NA	NA	NA	NA	NA	NA	NA	NA	NA	NA	NA	NA	NA	NA	NA	NA	NA	26382.9	NA	NA	NA	NA	NA	NA	NA	NA	NA	NA	NA	NA	NA	NA	NA	39392.9
_[Acetyl (Protein N-term)]GDMANNSVAYSGVKNS[Phospho (STY)]LK_.2	NA	NA	NA	NA	NA	NA	NA	NA	NA	NA	NA	NA	NA	NA	NA	NA	30677.8	NA	NA	NA	NA	NA	NA	NA	NA	NA	NA	NA	NA	NA	NA	NA	NA	NA	NA	NA	NA	NA	NA	NA	NA	NA	NA	NA	NA	NA	NA	NA	NA
_[Acetyl (Protein N-term)]GDS[Phospho (STY)]DDEYDR_.2	29880.1	NA	38685.9	50230.5	40400.3	50124.9	30058.1	48483.3	36095.5	8606.77	40404.3	53013.2	43436.3	50216	32799.1	13708.5	60172.7	47950.2	46053	46946.6	43183.8	34598.8	7826.28	54596.7	39053.7	40307.5	61463.8	44506.6	46734.3	51575.4	37656	60203	57267.8	26815.5	57750.5	57061.6	NA	79281.3	60258.7	58055.5	91659.4	79530.5	82733.9	85185	103902	58468.2	67016.1	90719.3	84991.9
_[Acetyl (Protein N-term)]GDS[Phospho (STY)]DDEYDRR_.2	328827	NA	272872	219051	321771	279222	250707	306090	296739	95943.8	297825	213290	402622	301307	261754	101697	297802	214760	326124	287262	349235	227294	78408.9	265629	353181	238847	208355	244315	294469	208949	309301	283129	281846	175863	188978	155994	37135.4	232424	467439	356056	324908	344819	323378	412066	395149	359711	492762	417770	345600
_[Acetyl (Protein N-term)]GDS[Phospho (STY)]DDEYDRRR_.3	6004.12	NA	13305	8608.36	5580.46	6103.34	10445.7	15539.6	17160.5	1710.11	16563.4	23498.4	6364.93	21258.6	11216.5	4390.03	21471.3	22335.7	6943.74	9610.31	12495.9	19097	1430.82	12301.4	6908.27	7345.49	19797.7	6808.83	5912.95	17829.7	5036.57	7087.54	NA	3248.83	3960.41	NA	NA	NA	17978.7	11016.3	5984.14	NA	6640.96	10752.4	22872.8	12955.8	12738.8	16666.6	NA
_[Acetyl (Protein N-term)]GEAGAGAGASGGPEAS[Phospho (STY)]PEAEVVK_.3	38536.2	NA	27358.1	31358.5	51070.7	34568.2	32130	38921	20591	24927.8	29931.8	NA	52874.2	48705.2	35002.5	34830.1	66461.9	50772.7	38996.7	39502.6	33088.3	31140.8	30183.8	NA	49735.5	37374.7	30088.6	37042.2	71552.6	46212.3	41818.8	39782.7	112750	123487	65338.9	96250.1	NA	NA	NA	NA	NA	NA	NA	NA	NA	NA	NA	NA	16239.5
_[Acetyl (Protein N-term)]GEHS[Phospho (STY)]PDNN[Deamidation (NQ)]IIYFEAEEDELTPDDK_.3	46575.9	NA	39785.7	41033.5	44386.2	NA	33656.9	40718.4	37656.2	35908.2	34352	34411.2	41177	38781.3	36249.3	39905	38805.7	NA	NA	NA	39549.4	34158.3	38788.1	36923	49597.6	NA	31674.6	36054	32372.4	27088.1	26649.5	26889.7	34370.6	NA	23839.3	NA	NA	NA	53948.3	42776.8	27758.4	25763	41728.2	37000.5	36594	40226.3	53919.9	50832.8	NA
_[Acetyl (Protein N-term)]GEHS[Phospho (STY)]PDNNIIYFEAEEDELTPDDK_.3	52379	NA	42822.1	40286.9	45558.5	35419.5	33035.9	42516.7	37913.2	NA	35036.3	38912	44039	39822.5	38795.8	43433.4	36746.8	33849.5	42113.3	41579.5	38560.2	32180.5	42214.7	38454.9	54086.5	15288.8	34954.9	38421.7	38743.5	28056.5	28288.4	30650.2	36058.2	NA	25492.9	31044.6	NA	20757.1	51112.5	46831.6	29313.2	NA	46067	41348.2	38334.6	41999.8	51574.7	53883.7	26509.9
_[Acetyl (Protein N-term)]GS[Phospho (STY)]PEDDLIGIPFPDHSSELLSC[Carbamidomethyl (C)]LNEQR_.3	NA	NA	NA	NA	NA	NA	NA	NA	NA	NA	NA	NA	NA	NA	NA	NA	NA	NA	NA	NA	NA	NA	NA	NA	NA	NA	NA	NA	NA	NA	NA	NA	NA	NA	NA	NA	NA	NA	NA	NA	NA	NA	NA	NA	NA	NA	NA	NA	NA
_[Acetyl (Protein N-term)]GSQPPLGS[Phospho (STY)]PLSR_.2	NA	NA	NA	NA	49920.8	NA	NA	NA	NA	NA	NA	NA	NA	NA	24317.3	NA	NA	NA	NA	NA	NA	NA	NA	NA	NA	NA	NA	NA	NA	NA	NA	NA	NA	NA	NA	NA	NA	NA	NA	NA	NA	34208.6	NA	NA	NA	NA	NA	NA	NA
_[Acetyl (Protein N-term)]M[Oxidation (M)]ADQ[Deamidation (NQ)]RQ[Deamidation (NQ)]RSLS[Phospho (STY)]TSGESLYHVLGLDK_.3	4.9674e+06	45940.2	2321850	2.91431e+06	5090519	2.3956e+06	2.78171e+06	3.96487e+06	2.21373e+06	2195311	3315876	2.4695e+06	5092060	4514834	3.49927e+06	54435.2	7.17272e+06	3.6697e+06	3.76099e+06	4.99442e+06	2347355	2.54991e+06	2.98409e+06	2594108	5369926	3023992	2.58234e+06	3.02661e+06	5450571	3.95596e+06	3648890	3699573	98852.2	6.21006e+06	3488390	4464855	754986	1.55556e+06	3.52613e+06	2371506	2.06862e+06	2.37524e+06	2.7348e+06	2235306	1.75949e+06	1.87037e+06	2.52514e+06	1738633	2.66124e+06
_[Acetyl (Protein N-term)]M[Oxidation (M)]DLAAAAEPGAGS[Phospho (STY)]QHLEVRDEVAEK_.3	34956.7	NA	NA	32674.8	29251.4	NA	NA	NA	NA	NA	28926.7	NA	NA	NA	NA	NA	NA	NA	NA	NA	NA	NA	26636.2	NA	54695.1	60783.4	NA	35569.2	37872.4	NA	NA	NA	27153.8	NA	32600.7	42212.8	10142.3	NA	NA	NA	NA	NA	NA	NA	NA	NA	NA	NA	NA
_[Acetyl (Protein N-term)]M[Oxidation (M)]DLFGDLPEPERS[Phospho (STY)]PRPAAGK_.3	46589.3	NA	23303.2	43264.1	84311.8	58010.9	40307.3	54035.4	43594.3	51598	52510	76234.3	67804.1	65847.3	40617.1	31237.3	104174	48042.8	42702.3	49769	40021.3	44431.9	32006	74800.4	71788.9	62217.4	28999.3	41263	67884.7	45502.4	42789.6	47636.1	39877.3	57855.5	27448	37061.6	54084.1	54214.4	55900.4	54928.5	65778	58019.4	57731.5	58494.1	61186.5	57083.4	56917.2	79148.9	65037.1
_[Acetyl (Protein N-term)]M[Oxidation (M)]DNYADLS[Phospho (STY)]DTELTTLLR_.3	NA	NA	13763.3	NA	NA	NA	NA	8157.9	15029.5	13211.1	6018.58	NA	26530.8	NA	12153.6	3560.52	22818.4	19564.1	10685.8	NA	12914.1	13489.8	2029.4	NA	25942.2	NA	NA	6252.28	9815.34	NA	8685.51	6729.07	2174.45	8189.7	NA	NA	NA	NA	7707.66	NA	NA	NA	NA	10942.5	4126.71	NA	NA	3095.32	NA
_[Acetyl (Protein N-term)]M[Oxidation (M)]DPQRS[Phospho (STY)]PLLEVK_.2	NA	NA	NA	NA	NA	NA	NA	NA	NA	NA	NA	NA	NA	NA	NA	NA	NA	NA	NA	NA	NA	NA	NA	NA	NA	NA	NA	NA	NA	NA	NA	NA	NA	NA	NA	NA	NA	NA	NA	NA	NA	NA	NA	NA	NA	NA	NA	14062.4	NA
_[Acetyl (Protein N-term)]M[Oxidation (M)]DRN[Deamidation (NQ)]PS[Phospho (STY)]PPPPGR_.2	NA	NA	NA	NA	NA	NA	NA	NA	NA	NA	NA	NA	NA	NA	NA	NA	NA	NA	NA	NA	NA	NA	NA	NA	NA	NA	NA	NA	NA	NA	NA	NA	NA	NA	NA	NA	NA	NA	NA	NA	NA	NA	NA	NA	NA	NA	42036.6	NA	NA
_[Acetyl (Protein N-term)]M[Oxidation (M)]DRNPS[Phospho (STY)]PPPPGR_.3	23469.9	NA	NA	19011.4	30029.2	14106.8	NA	NA	NA	13512.6	20465.7	18383.7	NA	NA	NA	NA	NA	NA	22320.1	11595.2	NA	NA	NA	NA	31693.4	19702.9	NA	20780.3	27267.7	NA	NA	NA	NA	14128.3	NA	15858.8	13287.6	12275.7	NA	29775.9	19334.7	12953.6	19895	25482.2	NA	20146	30741.1	30670.5	NA
_[Acetyl (Protein N-term)]M[Oxidation (M)]DSAGQDINLNS[Phospho (STY)]PNK_.2	57142.4	NA	56461.3	59313.2	70492.7	106531	88369.3	81671.4	72750.6	65976.7	73180.9	66442	48905.9	60919.3	42793.5	41660.9	34280	33804	67881.5	44236.6	84502.6	76574.8	52790.5	90639.2	60006.7	90747.6	63547.5	72063.1	25153.8	25403.1	27315.4	24096.2	31777.3	28977.6	29724.1	33907.5	36632.3	42777.6	49339.7	50896.6	57338.5	70165.5	53509.8	65440.3	69406.4	75917.9	80125.8	66887.2	39512.5
_[Acetyl (Protein N-term)]M[Oxidation (M)]DTDLYDEFGNYIGPELDS[Phospho (STY)]DEDDDELGR_.3	NA	NA	NA	28109.1	18882.1	NA	25909	NA	NA	NA	NA	22743.2	NA	NA	NA	45241.6	NA	NA	NA	23046.8	NA	NA	23844.3	15293	NA	NA	18043.8	14205.7	NA	NA	NA	NA	15368.9	NA	NA	16800.4	NA	NA	NA	NA	NA	NA	15670.4	NA	NA	33714.7	18568.5	18284.8	NA
_[Acetyl (Protein N-term)]M[Oxidation (M)]EDLDQ[Deamidation (NQ)]SPLVSSSDS[Phospho (STY)]PPRPQ[Deamidation (NQ)]PAFK_.3	870669	68505.4	683292	920059	917642	841919	793242	796712	664511	500997	822443	668322	886774	925551	797122	801682	707799	595776	912666	790561	573161	630923	512940	821349	1.10926e+06	1.09494e+06	663551	1.02376e+06	870361	771800	788308	700070	646545	544463	576260	614706	1.50131e+06	943402	509046	882535	983714	1.03929e+06	852048	674274	698351	621732	610993	577240	833155
_[Acetyl (Protein N-term)]M[Oxidation (M)]EDLDQ[Deamidation (NQ)]SPLVSSSDS[Phospho (STY)]PPRPQPAFK_.3	1.00095e+06	66029.3	763879	1069779	1.07599e+06	997013	914294	929756	757670	566184	987209	773053	1.03113e+06	1.06194e+06	876065	907991	825760	690126	1.02522e+06	948131	660835	733842	636025	948568	1.27488e+06	1.19024e+06	735005	1185727	986672	885841	888665	858797	735778	642428	692733	745975	1.67511e+06	994432	540546	964807	1076418	1.14353e+06	938204	767134	768886	703758	717284	652688	925343
_[Acetyl (Protein N-term)]M[Oxidation (M)]EDLDQSPLVSSSDS[Phospho (STY)]PPRPQ[Deamidation (NQ)]PAFK_.3	864669	57977	668636	946161	933725	877245	33460.4	37824.7	669206	491793	860723	682272	889951	948161	39652.2	32489.8	718561	615238	44194.4	817126	580698	636514	547975	38548.3	1.119e+06	1.07667e+06	651179	43713.4	877679	778619	785199	746338	640457	551455	30577.7	653406	58354.8	883088	468478	850036	41353.3	1.0147e+06	826357	665294	674103	612124	604757	565154	825812
_[Acetyl (Protein N-term)]M[Oxidation (M)]EDLDQSPLVSSSDS[Phospho (STY)]PPRPQPAFK_.3	912323	66650.8	701705	975482	985128	887829	837754	848660	690662	523468	895929	703722	941278	963733	800188	823251	754046	635343	933360	863472	605384	660350	578100	860784	1161034	1.0896e+06	669486	1.07729e+06	896582	794884	813227	776459	671488	579748	626874	678743	1504558	907953	490280	879559	980491	1045128	853830	702156	689614	643653	668031	592507	834118
_[Acetyl (Protein N-term)]M[Oxidation (M)]EDS[Phospho (STY)]M[Oxidation (M)]DMDMSPLRPQNYLFGC[Carbamidomethyl (C)]ELK_.3	132888	NA	140813	NA	223127	191230	183892	243186	64799	NA	NA	125500	NA	162613	83995	135076	NA	NA	NA	197213	NA	66750.9	NA	125863	171712	155084	163475	NA	170528	115670	NA	142252	153780	NA	169158	NA	25158.8	76550.1	NA	137080	157667	144331	154453	153066	114765	66763.5	161189	NA	124318
_[Acetyl (Protein N-term)]M[Oxidation (M)]EDS[Phospho (STY)]MDMDMSPLRPQNYLFGC[Carbamidomethyl (C)]ELK_.3	326309	NA	286647	206505	443346	258958	158812	941719	128373	69453.2	315704	180705	762834	247942	NA	224385	226904	247071	148554	249706	344717	209380	242681	140398	216778	234546	201171	227169	379987	174268	274064	362999	336247	282888	304760	135569	31252.8	125554	599482	165712	237721	241563	263177	252280	198390	240901	102592	152923	293078
_[Acetyl (Protein N-term)]M[Oxidation (M)]EDSM[Oxidation (M)]DM[Oxidation (M)]DMS[Phospho (STY)]PLRPQNYLFGC[Carbamidomethyl (C)]ELK_.3	114458	NA	62485.5	NA	125983	61665.6	61746.4	46760.8	NA	NA	65474.1	53456.6	69119.4	28259	25263.1	63817.4	NA	28181.4	80050.9	72295.1	136944	30876.5	37436.2	15627.9	42104.2	22763.8	25680.5	23952.4	201825	23351.4	63216.2	25880.9	30275.3	30914.2	66346.2	17609.7	12572.2	85096.1	NA	62259.6	61978.8	22146.2	22997.3	77011.8	118374	107315	38026.9	78756.5	65514.9
_[Acetyl (Protein N-term)]M[Oxidation (M)]EDSM[Oxidation (M)]DMDM[Oxidation (M)]S[Phospho (STY)]PLRPQNYLFGC[Carbamidomethyl (C)]ELK_.3	63822.8	NA	21740.4	NA	40660.8	73993.6	30717.3	41172.6	NA	NA	NA	53456.8	NA	26819.5	NA	19469.1	NA	NA	21837.6	24325.1	NA	29923.2	NA	24736.8	NA	22637.9	24876.9	23914.1	44774.5	23351.4	NA	23489.6	30564.9	31037.7	46719.9	18589.8	9705.04	20193.2	48395.9	NA	27965.8	20789.8	22724.9	NA	NA	NA	NA	32571.7	23802.3
_[Acetyl (Protein N-term)]M[Oxidation (M)]EDSM[Oxidation (M)]DMDMS[Phospho (STY)]PLRPQNYLFGC[Carbamidomethyl (C)]ELK_.3	172658	NA	123408	108692	194354	169358	150898	85971.1	NA	87244.9	69067.1	113155	164736	222814	109545	120363	121790	NA	139392	121795	141957	53517.7	66941.3	106301	70119.1	99291.2	117970	136088	175812	54994.8	131963	212803	175258	170017	153648	146599	35677.6	85284.6	80102.5	148501	151676	127672	129850	120178	83676.1	55021.4	129900	95219.4	129305
_[Acetyl (Protein N-term)]M[Oxidation (M)]EDSMDM[Oxidation (M)]DM[Oxidation (M)]S[Phospho (STY)]PLRPQNYLFGC[Carbamidomethyl (C)]ELK_.3	51236.5	NA	65300.9	73088.1	33726.2	59101.4	49193.4	NA	NA	9824.71	81526.6	46176.3	59478.5	25702.1	34264.8	16315.6	NA	19361.5	18207.6	69252.2	26782.4	24074.1	37881.4	21835.4	35119.2	19606	19403.3	18235.8	39607.7	19917.2	59246.1	21050.9	26711.5	26814.2	41826.7	14023.2	8560.54	59154.2	NA	NA	56912.7	31047.2	19801.2	19768.4	NA	NA	25386.2	NA	21019.5
_[Acetyl (Protein N-term)]M[Oxidation (M)]EDSMDM[Oxidation (M)]DMS[Phospho (STY)]PLRPQNYLFGC[Carbamidomethyl (C)]ELK_.3	200501	NA	125137	100172	197971	171462	162546	85993.2	110330	117298	69233	125793	165702	150394	139699	103084	122868	116896	140812	128343	105657	54339.3	19734.3	107197	173922	102443	137061	140245	172630	134927	132489	127406	177213	172337	150921	148899	51800.8	87208.8	NA	NA	159844	128145	133297	119240	50416.7	58306	133681	97773.4	129306
_[Acetyl (Protein N-term)]M[Oxidation (M)]EDSMDMDM[Oxidation (M)]S[Phospho (STY)]PLRPQNYLFGC[Carbamidomethyl (C)]ELK_.3	186811	NA	NA	108692	42166.6	169680	75451.6	206470	NA	NA	NA	18867.1	NA	41722.1	139153	120363	28943.3	NA	139116	78016.8	NA	132386	NA	105734	45136.6	27798.4	22056.4	28756.9	143504	54381.6	53896.1	33395.2	175103	79947.3	151855	138002	11171.2	28562.8	NA	46190.2	36349.8	34968.7	129335	90219.6	23851.8	108466	132770	NA	37927.8
_[Acetyl (Protein N-term)]M[Oxidation (M)]EDSMDMDMS[Phospho (STY)]PLRPQ[Deamidation (NQ)]NYLFGC[Carbamidomethyl (C)]ELK_.3	257376	NA	253905	214911	514220	255414	156015	761220	145322	84200.3	257925	172417	369726	238584	84131	217787	222796	226319	240351	256982	244219	148032	205569	177525	254077	221607	203086	278421	432775	155534	312875	302388	307935	283155	278770	206261	47515.1	110391	490323	189859	281481	239107	285620	268260	189941	206801	115971	232258	253541
_[Acetyl (Protein N-term)]M[Oxidation (M)]EDSMDMDMS[Phospho (STY)]PLRPQNYLFGC[Carbamidomethyl (C)]ELK_.3	631952	NA	234122	200207	388681	224715	143447	411637	82800.7	63724.3	241384	162710	332132	228724	211790	210162	185090	209239	386990	235597	248606	244203	183215	152807	179958	206320	185290	260447	413345	139103	299536	271867	293514	264609	260600	184518	42692.8	98302.5	465958	173614	265025	194230	265309	248264	173021	191762	93653	206291	224449
_[Acetyl (Protein N-term)]M[Oxidation (M)]EEPQSDPSVEPPLS[Phospho (STY)]QETFSDLWK_.3	NA	NA	NA	NA	NA	NA	NA	NA	NA	NA	NA	NA	NA	NA	NA	NA	NA	NA	NA	NA	NA	NA	NA	34042.4	NA	NA	NA	NA	NA	NA	NA	NA	NA	NA	NA	NA	NA	NA	NA	NA	NA	NA	NA	NA	NA	NA	NA	NA	NA
_[Acetyl (Protein N-term)]M[Oxidation (M)]EPETALWGPDLQGPEQS[Phospho (STY)]PNDAHR_.3	NA	NA	NA	NA	NA	NA	NA	NA	NA	NA	NA	NA	NA	NA	NA	NA	NA	NA	NA	NA	NA	NA	NA	NA	NA	NA	NA	NA	NA	61153.2	NA	NA	40230.4	65935.9	NA	NA	5577.25	37331.1	NA	86358.1	39649.9	68622.9	NA	NA	98675	NA	66849.4	51012.4	61117.8
_[Acetyl (Protein N-term)]M[Oxidation (M)]ERPEEGKQS[Phospho (STY)]PPPQPWGR_.3	NA	NA	NA	NA	NA	NA	NA	NA	NA	NA	NA	NA	NA	NA	NA	NA	NA	NA	NA	NA	NA	NA	NA	NA	NA	NA	NA	NA	NA	NA	NA	NA	NA	NA	NA	NA	39769.7	NA	NA	NA	NA	NA	NA	NA	NA	NA	NA	NA	NA
_[Acetyl (Protein N-term)]M[Oxidation (M)]ES[Phospho (STY)]QEPTESSQN[Deamidation (NQ)]GK_.2	NA	NA	NA	NA	NA	NA	9878.23	NA	NA	NA	NA	NA	NA	NA	NA	NA	NA	NA	NA	NA	NA	NA	NA	NA	NA	NA	5649.8	NA	11625.6	13346.7	NA	NA	38528.2	NA	30671.9	22141.3	33243.5	21553.9	NA	NA	NA	35257.5	NA	NA	NA	NA	NA	NA	27184.5
_[Acetyl (Protein N-term)]M[Oxidation (M)]ES[Phospho (STY)]QEPTESSQNGK_.2	NA	NA	NA	NA	NA	NA	NA	NA	NA	NA	NA	NA	NA	NA	NA	NA	NA	NA	NA	NA	NA	NA	NA	NA	NA	NA	NA	NA	NA	NA	NA	NA	NA	NA	NA	NA	NA	NA	NA	NA	NA	NA	NA	NA	NA	NA	NA	NA	NA
_[Acetyl (Protein N-term)]M[Oxidation (M)]ESADFYEAEPRPPM[Oxidation (M)]SSHLQS[Phospho (STY)]PPHAPSSAAFGFPR_.4	113654	NA	48785.7	88934.5	147522	104533	91158.3	99293.3	NA	60436	76164.9	84280.7	120856	86102.9	87930.4	60045.8	138787	79539.1	68565	76191.9	59632.5	63400.6	66573.3	84723.2	124923	45688.4	49046.8	60348.4	89304	51076.3	68922.8	52722.1	80808.6	78023.6	66313.5	88917.2	18728.1	NA	57740.3	51174.7	43042.6	52928.1	45499.8	64526.7	35477.8	32067.1	NA	49574.7	28784.2
_[Acetyl (Protein N-term)]M[Oxidation (M)]ESADFYEAEPRPPMSSHLQS[Phospho (STY)]PPHAPSSAAFGFPR_.4	98523.9	NA	57904.7	79037.8	119767	83976.6	79086.7	85139.9	52549.4	270734	67413.2	59276.3	90475.3	68930.1	307658	55174.7	96656.7	356712	58875.7	66925.9	55074	60244.4	NA	74423.9	96163.9	54982	42737.1	60303.8	73366	52786.2	59127.3	52811.1	66674.3	68138.3	58632.8	75298	12813.5	NA	NA	NA	NA	48503.4	NA	50656	NA	NA	NA	54467.8	NA
_[Acetyl (Protein N-term)]M[Oxidation (M)]EVAEPSS[Phospho (STY)]PTEEEEEEEEHSAEPRPR_.3	290190	NA	206096	186327	225522	220732	127856	184969	148077	174934	229942	242822	338376	295791	309912	189335	231987	176934	180967	184244	219003	183543	144623	253493	320368	45059.5	155873	175321	182317	163120	160076	177648	185349	83281.8	171900	175953	NA	62494	419738	292954	327174	108435	278006	369159	240604	213993	273435	327508	229938
_[Acetyl (Protein N-term)]M[Oxidation (M)]EVAEPSSPT[Phospho (STY)]EEEEEEEEHSAEPRPR_.3	241930	NA	173439	156472	187810	185400	106297	153004	124912	147647	190203	203140	280813	249933	259511	156199	195110	145606	150859	154879	183517	153329	118405	212316	269645	38415.9	130353	148328	155407	135253	134070	149358	154748	68280.3	142755	146714	NA	52558	347250	245599	276553	91637.1	232217	310968	202986	176570	230212	276274	190776
_[Acetyl (Protein N-term)]M[Oxidation (M)]EVKPPPGRPQPDS[Phospho (STY)]GR_.3	NA	NA	NA	NA	NA	98045.7	82688.6	107200	77369.4	63770.2	NA	NA	106218	NA	50674.3	53727.6	NA	NA	93344.7	NA	102962	75290.1	62897.6	NA	NA	80902.9	NA	NA	NA	NA	NA	NA	55872.2	65330.3	43378.2	58165.4	49389.4	48991.2	NA	77220	69809.7	NA	66928.1	90245.8	91144.4	88583.8	106297	99261.8	NA
_[Acetyl (Protein N-term)]M[Oxidation (M)]EVS[Phospho (STY)]PLQ[Deamidation (NQ)]PVNENMQVNK_.3	NA	NA	NA	NA	22151.3	27551.5	31135.5	23589.3	13344.9	19706.6	NA	NA	NA	NA	NA	8759.94	NA	NA	22567.4	NA	35156.2	NA	15851	25821	NA	NA	NA	NA	NA	NA	NA	NA	NA	NA	NA	NA	11867.2	NA	NA	NA	NA	20536.6	NA	18932.3	25411.2	22050.5	NA	NA	NA
_[Acetyl (Protein N-term)]M[Oxidation (M)]EVS[Phospho (STY)]PLQPVNENM[Oxidation (M)]QVNK_.3	NA	NA	NA	NA	NA	NA	NA	NA	NA	NA	NA	NA	NA	NA	NA	NA	NA	NA	NA	NA	NA	NA	NA	NA	NA	NA	NA	NA	NA	NA	NA	NA	NA	NA	NA	NA	NA	NA	NA	NA	NA	NA	NA	NA	NA	NA	NA	NA	NA
_[Acetyl (Protein N-term)]M[Oxidation (M)]EVS[Phospho (STY)]PLQPVNENMQVNK_.2	76310.6	NA	57875.5	76465.1	117082	98953.1	114865	101843	84448.7	NA	58009.5	68148.1	101391	90949.7	NA	59941.4	85174.4	NA	85643.6	78956.5	114321	90101.3	71469.2	94601.8	96885.4	85603.2	NA	76529.8	78131.9	NA	68997.5	50915.5	NA	79578.3	NA	NA	29476.3	NA	NA	97480	73016	104678	81404.6	91387.1	NA	99811.3	105189	94127.4	NA
_[Acetyl (Protein N-term)]M[Oxidation (M)]N[Deamidation (NQ)]TAPSRPS[Phospho (STY)]PTR_.2	53769.7	NA	31944.9	35565.5	50819.5	38109.7	30807.7	40175.8	33598.8	26479.1	35255.2	44207.4	60442.2	50484.5	37698.2	28217.4	67562.6	40391.9	41437.4	42781.5	NA	37754.6	27256.1	40995.9	50754.6	49815	27988.9	35870	43681.9	44322.6	29943.5	37559.2	26584.1	38447.8	25726.1	27698.6	29101.8	31776.7	54871.6	53548.4	38699.8	38404.1	39370.6	42636.4	34568.1	33618.1	45055.1	41087.4	44471.9
_[Acetyl (Protein N-term)]M[Oxidation (M)]N[Deamidation (NQ)]TAPSRPS[Phospho (STY)]PTRR_.3	75131.9	NA	32075.2	35158.5	62192.5	42140.7	35572.5	51667.4	38162.6	28313.3	38122.2	42871.1	77523.2	78201.5	52886	27526.4	68403	43471.7	57433.5	46014	46076	44137	25470.6	43608.8	72667.8	66602.6	30740.3	40877.8	54443.9	54243.6	35424.5	46626.5	39592.3	47162.5	28191.8	36151.6	58559.6	54134.2	76400.2	63279.5	73271.7	66104.9	58405.7	54673.4	52864.2	49443.8	56350.9	50080.1	78941.7
_[Acetyl (Protein N-term)]M[Oxidation (M)]NHLPEDMENALTGS[Phospho (STY)]QSSHASLR_.3	NA	NA	NA	NA	NA	NA	NA	NA	NA	NA	NA	NA	NA	NA	NA	NA	NA	NA	NA	NA	NA	NA	NA	NA	NA	NA	NA	NA	NA	NA	NA	NA	NA	NA	NA	NA	6326.54	NA	NA	NA	NA	17095.9	NA	NA	NA	NA	NA	NA	17094.4
_[Acetyl (Protein N-term)]M[Oxidation (M)]NHLPEDMENALTGSQSSHAS[Phospho (STY)]LR_.3	NA	NA	NA	NA	NA	NA	NA	NA	NA	NA	NA	NA	NA	NA	NA	NA	NA	NA	NA	NA	NA	NA	NA	NA	NA	NA	NA	NA	NA	NA	NA	NA	NA	NA	NA	NA	6326.5	NA	NA	NA	NA	NA	NA	NA	NA	NA	NA	NA	17094.3
_[Acetyl (Protein N-term)]M[Oxidation (M)]NLLPNIES[Phospho (STY)]PVTR_.2	NA	NA	16258.7	NA	NA	NA	NA	NA	20691.5	NA	15204.3	20443.2	NA	NA	NA	NA	NA	NA	15908.1	NA	33057.7	NA	NA	18699.8	NA	NA	NA	NA	NA	18906.6	NA	17981.4	NA	30952.3	NA	15023.4	NA	13747.5	NA	28289.3	19838.5	21034.8	27488.6	26329.6	29946.9	27349	41213.4	29963.3	NA
_[Acetyl (Protein N-term)]M[Oxidation (M)]NPEY[Phospho (STY)]DYLFK_.2	NA	NA	NA	NA	NA	NA	NA	NA	NA	NA	NA	NA	16240	NA	12197.4	NA	NA	NA	NA	NA	NA	NA	NA	NA	NA	NA	NA	NA	NA	NA	4321.94	NA	NA	NA	NA	NA	NA	NA	NA	NA	NA	NA	NA	NA	NA	NA	NA	NA	NA
_[Acetyl (Protein N-term)]M[Oxidation (M)]NTAPSRPS[Phospho (STY)]PTR_.2	60415	NA	39180	43166.9	58922.5	46093.2	38278.9	47478	38402.7	31859.8	43661	53731.6	70178.5	65402	43661.8	34409	81097.6	48315.9	52051.9	51527.8	43618.9	45862.2	32204.2	54778	62698.3	62407.8	34508.9	43733.4	54172.9	50898.1	37515.1	46448.8	33116.5	48173.8	31930.7	33844.3	37832.9	38789.3	63418.1	65242.4	43883.4	46547.7	45382	53966.6	42338.5	42027.5	53840.8	50817.4	56685.1
_[Acetyl (Protein N-term)]M[Oxidation (M)]NTAPSRPSPT[Phospho (STY)]R_.2	60415	NA	39712.1	42890.1	58144.3	46093.2	38278.9	47091.6	38402.9	31859.8	43661	53731.6	68587.3	65401.9	43759.1	34409.1	81097.6	48315.9	52051.9	50981.4	44080.5	45782.9	32183.9	54172.7	62619.2	62236.5	34545.6	43595.6	54054.6	50898.1	37515	46448.8	32793.8	47776.1	31930.7	33638.5	37832.9	38741.7	62266.6	64762.7	43913.6	46014.3	45382	53966.6	42595.1	42027.5	53840.8	50811.5	56663.1
_[Acetyl (Protein N-term)]M[Oxidation (M)]QNSEGGADSPASVALRPSAAAPPVPAS[Phospho (STY)]PQR_.3	NA	NA	NA	NA	NA	NA	NA	NA	NA	NA	NA	NA	NA	NA	NA	NA	NA	NA	NA	NA	NA	NA	NA	NA	NA	NA	NA	NA	NA	NA	NA	NA	NA	NA	NA	NA	26606.5	NA	NA	NA	NA	NA	NA	NA	NA	NA	NA	NA	NA
_[Acetyl (Protein N-term)]M[Oxidation (M)]S[Phospho (STY)]PTPPLFSLPEAR_.2	NA	NA	16638.9	NA	NA	NA	NA	NA	33972	NA	NA	NA	40455.8	NA	NA	NA	43431.6	NA	9625.96	NA	35485.7	NA	NA	NA	39693	NA	NA	NA	NA	30391.2	NA	NA	NA	NA	NA	NA	NA	9882.78	27003.8	NA	NA	NA	NA	NA	NA	NA	NA	NA	NA
_[Acetyl (Protein N-term)]M[Oxidation (M)]TSPC[Carbamidomethyl (C)]SPPLKPPIS[Phospho (STY)]PPK_.3	NA	NA	NA	NA	NA	NA	NA	NA	NA	NA	NA	9535.83	NA	NA	NA	NA	NA	NA	NA	NA	NA	NA	14689.9	NA	NA	22116.6	NA	NA	NA	NA	18200.9	18304.1	NA	NA	NA	NA	NA	NA	NA	12494.6	NA	NA	NA	NA	NA	NA	NA	NA	NA
_[Acetyl (Protein N-term)]M[Oxidation (M)]WNSGFESYGSSSYGGAGGYTQSPGGFGS[Phospho (STY)]PAPSQAEK_.4	NA	NA	NA	105748	NA	NA	NA	NA	NA	NA	NA	NA	NA	NA	NA	NA	NA	30715	NA	NA	NA	NA	NA	NA	NA	NA	NA	NA	NA	NA	NA	NA	NA	NA	NA	NA	NA	NA	NA	NA	NA	NA	NA	NA	NA	NA	191116	NA	NA
_[Acetyl (Protein N-term)]M[Oxidation (M)]YPESTTGSPARLS[Phospho (STY)]LR_.2	NA	NA	NA	NA	NA	NA	NA	NA	NA	NA	NA	NA	NA	36042.7	NA	NA	34978.6	NA	NA	NA	NA	NA	NA	NA	NA	NA	NA	NA	NA	NA	NA	NA	NA	NA	NA	NA	NA	NA	NA	NA	NA	NA	NA	NA	NA	NA	NA	NA	NA
_[Acetyl (Protein N-term)]M[Oxidation (M)]YTAIPQSGS[Phospho (STY)]PFPGSVQDPGLHVWR_.3	NA	NA	NA	NA	NA	NA	NA	NA	NA	NA	NA	NA	NA	NA	NA	NA	NA	NA	NA	NA	NA	NA	NA	NA	NA	NA	NA	NA	24223.6	17476.6	16963.7	14754.3	37452.5	49231.8	24933.8	39574.1	3534.6	NA	NA	NA	12568.9	10768.9	NA	NA	NA	NA	NA	NA	NA
_[Acetyl (Protein N-term)]MDDAHES[Phospho (STY)]PSDK_.2	NA	NA	NA	NA	NA	NA	NA	NA	NA	NA	NA	NA	NA	NA	NA	NA	NA	NA	NA	NA	NA	NA	NA	NA	NA	NA	NA	NA	NA	NA	NA	NA	NA	NA	NA	NA	NA	NA	NA	NA	26116.8	28548.4	NA	NA	NA	NA	NA	NA	NA
_[Acetyl (Protein N-term)]MDDDS[Phospho (STY)]LDELVAR_.2	14571.4	NA	5859.86	8514.31	16134.1	NA	9913.82	13535.8	9146.22	9376.98	8759.91	9293.52	13473.8	12713.8	9514.74	NA	NA	NA	10688.9	14229.7	10973.2	NA	10017.4	9076.52	15702.3	NA	8515.02	NA	NA	NA	NA	NA	NA	NA	NA	NA	NA	8385.47	18684.7	14143.4	13289.8	12179.7	15239.6	18297.5	17330.5	15919.1	22918.2	19330.7	9020.04
_[Acetyl (Protein N-term)]MDEETRHS[Phospho (STY)]LEC[Carbamidomethyl (C)]IQ[Deamidation (NQ)]ANQIFPR_.3	NA	NA	NA	NA	NA	NA	NA	NA	NA	NA	NA	NA	NA	NA	NA	NA	NA	NA	NA	NA	NA	NA	NA	NA	45869.3	36136.5	19851.4	NA	NA	NA	NA	NA	NA	NA	NA	NA	12613.7	16533.9	NA	NA	NA	NA	NA	NA	NA	NA	NA	NA	NA
_[Acetyl (Protein N-term)]MDEETRHS[Phospho (STY)]LEC[Carbamidomethyl (C)]IQANQIFPR_.3	NA	NA	26384.4	NA	NA	NA	NA	NA	NA	NA	NA	NA	34214.8	25617.2	NA	NA	NA	NA	NA	NA	NA	NA	NA	NA	64684	54453.3	NA	NA	NA	NA	NA	NA	NA	NA	NA	NA	18995.3	26394.5	NA	NA	NA	NA	NA	NA	NA	NA	NA	NA	NA
_[Acetyl (Protein N-term)]MDEPS[Phospho (STY)]PLAQPLELNQHSR_.3	9700.33	NA	NA	7563.44	13473	NA	10499.7	12504.5	8926.87	NA	10092.6	8972.28	14391.4	13853.1	12263.3	7130	NA	8162.69	7165.92	9263.16	13158.6	13251.9	11150.9	14658.2	NA	NA	NA	8064.78	11220.7	NA	NA	NA	6123.23	NA	NA	NA	NA	NA	NA	NA	NA	NA	NA	NA	NA	16164.3	9548.05	8608.57	NA
_[Acetyl (Protein N-term)]MDEQS[Phospho (STY)]QGMQGPPVPQFQPQK_.3	NA	NA	NA	NA	NA	NA	NA	NA	NA	NA	NA	NA	NA	NA	NA	NA	NA	NA	NA	NA	NA	NA	NA	NA	NA	NA	NA	NA	NA	NA	NA	NA	25702.1	32825.7	21661.4	21418.6	NA	NA	NA	NA	NA	NA	NA	NA	NA	NA	NA	NA	16776.1
_[Acetyl (Protein N-term)]MDETS[Phospho (STY)]PLVS[Phospho (STY)]PER_.2	NA	NA	31380.2	NA	NA	NA	NA	NA	52102.6	NA	46922.3	NA	58224.5	NA	70508.2	64649.1	NA	NA	NA	43843	57800.1	NA	61105.6	NA	NA	NA	NA	NA	NA	NA	NA	NA	NA	NA	40278.5	NA	NA	NA	NA	NA	NA	NA	NA	NA	NA	NA	NA	NA	NA
_[Acetyl (Protein N-term)]MDETS[Phospho (STY)]PLVSPER_.2	NA	NA	NA	NA	NA	NA	NA	NA	NA	NA	NA	NA	29482.2	NA	21695.6	27625.5	NA	NA	NA	NA	17672.2	NA	NA	NA	NA	NA	NA	NA	NA	NA	NA	NA	NA	NA	NA	NA	NA	NA	NA	NA	NA	NA	NA	NA	NA	NA	NA	NA	NA
_[Acetyl (Protein N-term)]MDFPTISRS[Phospho (STY)]PSGPPAMDLEGPR_.3	17769.7	NA	9888	11640.7	23016.3	NA	11912.6	21143	9209.37	7715.56	10238.2	9047.68	27440.3	21021.6	17202.6	14828.1	34487.6	16304.7	17035	19152.7	13644	14189.8	18525.1	16207.8	15352.3	NA	9513.5	8165.86	15529.3	12083.1	8351.42	10409	11216.6	13070.4	8399.61	9900.47	NA	NA	15094.4	10268.5	6143.93	7826.94	10628.5	12559.5	NA	9331.48	14219.6	9726.35	6509.52
_[Acetyl (Protein N-term)]MDHTEGS[Phospho (STY)]PAEEPPAHAPS[Phospho (STY)]PGK_.3	31399.1	13553.5	42796	24673.3	33230.7	33580.2	36397.2	39256.3	43243.5	39570.2	39625.8	38521.9	27109.4	NA	NA	NA	31955.8	NA	30720.1	25270.5	32457.7	26353.5	18775.5	25008.9	32787.5	44268.8	31771.1	32180.8	23930.9	35127.9	33327	32229.2	NA	26297.2	NA	NA	NA	16051	NA	26462	16324.2	21083	17633.7	29121.9	23139.4	21839.7	38333.2	27499.6	20415.2
_[Acetyl (Protein N-term)]MDHYDS[Phospho (STY)]QQTNDYMQPEEDWDR_.3	NA	NA	NA	NA	81245.2	NA	NA	NA	NA	NA	NA	NA	NA	NA	NA	NA	NA	NA	85241.4	NA	NA	NA	NA	NA	NA	NA	NA	NA	NA	NA	97545.4	NA	44681.3	NA	NA	52690.1	NA	NA	NA	NA	NA	46142	NA	NA	NA	NA	NA	NA	NA
_[Acetyl (Protein N-term)]MDHYDS[Phospho (STY)]QQTNDYMQPEEDWDRDLLLDPAWEK_.4	NA	NA	NA	NA	NA	NA	NA	NA	NA	NA	NA	NA	NA	NA	NA	NA	NA	NA	NA	NA	NA	NA	NA	NA	NA	NA	NA	NA	NA	NA	NA	NA	NA	NA	NA	NA	NA	NA	NA	NA	NA	NA	NA	NA	NA	NA	NA	NA	NA
_[Acetyl (Protein N-term)]MDLAAAAEPGAGS[Phospho (STY)]QHLEVR_.2	98298.7	NA	60491.7	83531.7	78065.5	52565.6	61268.4	65821.9	49018.8	54831.2	45922.9	31127.2	91628.6	49196.3	58927	49349.3	43412	41166	54120.9	54306.3	50502.2	43965.6	44292.7	46804.1	115901	73084.5	42042.2	104671	81812.4	33964.3	54084.7	49618.1	73546	64152.8	64778	74360.4	10640.6	25899.8	50455.8	46659	23984	34779.6	28806	32364.2	42496.6	43721.5	50535.1	37546.4	23820.2
_[Acetyl (Protein N-term)]MDLAAAAEPGAGS[Phospho (STY)]QHLEVRDEVAEK_.3	343514	NA	184981	226443	247846	169308	200165	235243	151093	174382	194175	168385	267726	198717	140634	172603	246917	144381	151784	177413	126536	150548	177169	169298	371316	315773	184210	255489	252760	119383	124750	147363	183704	272397	185775	210497	24866.4	67864.5	99003.3	84805.5	67481.8	81796	109318	86316.4	123900	114317	151344	131178	37250.5
_[Acetyl (Protein N-term)]MDLFGDLPEPERS[Phospho (STY)]PR_.2	NA	NA	NA	NA	12509.3	NA	NA	NA	NA	NA	NA	6201.15	NA	NA	NA	4346.77	NA	NA	NA	NA	NA	NA	7154.63	NA	NA	NA	NA	NA	NA	NA	NA	NA	NA	NA	NA	NA	5978.02	NA	NA	NA	NA	NA	NA	NA	NA	4718.6	8647.79	NA	NA
_[Acetyl (Protein N-term)]MDLFGDLPEPERS[Phospho (STY)]PRPAAGK_.3	479536	NA	169569	292618	752372	352879	284704	522711	427748	470634	489354	507232	657153	417163	331425	260458	1.08542e+06	355323	248489	391486	380726	312544	370488	468586	585564	334010	220538	257363	629062	263417	244862	273774	254348	298809	208424	242410	143835	310898	621468	389244	409505	375840	535095	437603	506755	389464	586116	677618	411497
_[Acetyl (Protein N-term)]MDNLS[Phospho (STY)]SEEIQQR_.2	84264.1	NA	60441.3	78887.9	110420	98267.3	58881.2	74681.6	84108	60052.4	87401.4	85215.4	93518.1	91200	78630.5	80796.3	104404	85061.5	96788.2	96500.3	68272.3	55520.7	51352	68646.8	100386	76438.1	50332.5	75646.1	80381.6	72016	65426.7	69981.5	68207.3	61272.2	53876.6	59210.6	46316.3	90750.4	118756	97573.4	78172.6	100895	95882.4	103856	95053.9	94796.9	95617.7	137770	75954.4
_[Acetyl (Protein N-term)]MDNYADLS[Phospho (STY)]DTELTTLLR_.3	17102.3	NA	15295.1	NA	NA	NA	3311.64	8980.11	17012.5	14029	6319.38	NA	28634.4	NA	13228.4	NA	24978.2	20514	11513.8	NA	14677.7	16204.7	NA	NA	27552.2	10217.7	NA	6559.25	9325.92	NA	9866.35	7646.64	NA	9749.01	3058.2	NA	NA	NA	9650.5	6233.14	NA	NA	NA	11345.6	6402.81	NA	2350.28	3114.85	NA
_[Acetyl (Protein N-term)]MDPPS[Phospho (STY)]PSR_.2	184916	NA	142740	166236	177029	149235	153483	203389	137894	95345.5	125396	124741	191107	197671	165454	115783	186040	141479	148550	141033	138576	137472	82764.9	130096	209755	155618	152927	166104	88826.4	71842.5	71086.8	82530.2	127421	118263	95681.7	113455	61412.3	150851	267633	191538	153952	209822	190891	214204	177115	187996	210335	152050	177535
_[Acetyl (Protein N-term)]MDPQRS[Phospho (STY)]PLLEVK_.2	82711.7	NA	51859	80241.9	160682	110990	139457	155008	76574.4	64106.7	53146.5	131394	110956	52943.7	34872	NA	59404	39986.9	90927.6	92331.6	110008	94783.6	79379.3	111958	57453.2	66936.1	51034	92504.5	NA	NA	40012.9	NA	NA	23717.6	NA	19756.7	25698.2	60693.4	77645.4	64666.5	67063.8	NA	67370.6	74853.8	88089.2	102749	111768	131233	28223.5
_[Acetyl (Protein N-term)]MDPSDFPS[Phospho (STY)]PFDPLTLPEK_.2	NA	NA	NA	NA	NA	NA	NA	NA	NA	NA	NA	NA	9123.25	NA	NA	NA	11385.2	7680.82	NA	NA	7965.8	NA	NA	NA	13350.5	NA	NA	NA	NA	NA	NA	NA	NA	5303.13	NA	NA	NA	NA	10643.9	NA	NA	NA	NA	NA	NA	NA	NA	NA	NA
_[Acetyl (Protein N-term)]MDRNPS[Phospho (STY)]PPPPGR_.2	1.16348e+06	NA	685183	713457	1.36573e+06	715900	856246	1.00004e+06	965347	696949	750579	592815	1.30061e+06	697392	642126	526471	927016	463298	732195	739474	877831	681900	529199	717706	1.38716e+06	622982	483970	709112	1.04451e+06	446596	691522	691403	645155	601896	438491	502259	254505	568008	1.40389e+06	1.03179e+06	592750	712258	1.06539e+06	1.08524e+06	999768	924254	1.39092e+06	1.2229e+06	520044
_[Acetyl (Protein N-term)]MDS[Phospho (STY)]DDEMVEEAVEGHLDDDGLPHGFC[Carbamidomethyl (C)]TVTYSSTDR_.4	20413	NA	NA	18615.1	25054.3	NA	15022.3	15146	21552.1	18881.4	NA	NA	19532.1	NA	16422.3	NA	NA	NA	NA	14973.3	17570.6	NA	16339.2	14431.2	14050.6	NA	NA	17502.5	17650.7	NA	NA	NA	NA	NA	NA	NA	NA	NA	20755.1	16003	9850.08	NA	12150.4	18472.8	NA	13337.2	18317.8	15650.3	NA
_[Acetyl (Protein N-term)]MDSAGQDIN[Deamidation (NQ)]LNS[Phospho (STY)]PNK_.2	390806	32887.9	331208	420463	568460	697627	820211	847192	691161	395837	629308	502057	345472	392710	244771	251672	284219	252543	460704	436585	773270	534702	455881	497058	400141	751948	424278	548383	211940	188840	208094	197995	210490	236942	198007	210631	138389	302351	279035	310588	268441	454483	381354	423920	591794	562296	717000	531350	235832
_[Acetyl (Protein N-term)]MDSAGQDINLNS[Phospho (STY)]PNK_.2	472433	46629	402588	509189	663938	833798	959833	990426	818056	475139	742570	602839	403225	470441	303113	298718	347958	307821	551183	521945	937901	635291	541337	588334	461107	896377	526800	642010	253374	238418	259810	244420	263921	286136	250755	265565	184861	381466	332878	382698	338502	562256	475108	513422	708218	681754	845250	639671	304033
_[Acetyl (Protein N-term)]MDT[Phospho (STY)]PLRR_.2	NA	NA	3071.33	NA	9852.91	NA	NA	7936.82	NA	NA	NA	NA	NA	NA	NA	NA	NA	NA	NA	NA	NA	NA	NA	NA	NA	NA	NA	4594.91	4754.44	NA	NA	NA	NA	NA	NA	NA	NA	NA	NA	NA	NA	NA	NA	NA	NA	NA	NA	NA	NA
_[Acetyl (Protein N-term)]MDTDLYDEFGNYIGPELDS[Phospho (STY)]DEDDDELGR_.3	NA	NA	75508.5	138600	57013.8	17079.1	62986	46684.4	64680.9	40519.2	42218.8	98557.1	NA	22009.1	28929.3	318624	NA	NA	NA	62091.2	70486.5	25585.7	339941	53782.4	NA	NA	67890.7	63676.9	NA	NA	NA	NA	50883.8	NA	15910.1	38944.2	NA	NA	264736	11575.3	NA	NA	33476.6	10239.9	NA	171169	45518.9	77360.2	NA
_[Acetyl (Protein N-term)]MDTPS[Phospho (STY)]PDPLPS[Phospho (STY)]PLPGEEEK_.3	NA	NA	NA	NA	NA	NA	NA	NA	13313.8	NA	NA	NA	NA	26013.4	NA	NA	NA	NA	NA	NA	17586.2	NA	NA	NA	NA	NA	18951.1	NA	NA	NA	NA	NA	NA	NA	NA	NA	NA	NA	NA	NA	NA	NA	NA	NA	NA	NA	NA	NA	NA
_[Acetyl (Protein N-term)]MDTPS[Phospho (STY)]PDPLPSPLPGEEEK_.2	184464	NA	NA	NA	150683	104307	NA	NA	NA	NA	NA	NA	161079	NA	119768	NA	222009	135156	NA	123974	NA	NA	NA	106418	168431	NA	108017	NA	179568	137205	130390	144522	128236	142070	124566	118714	33541.9	106336	171668	142195	148582	183642	147600	140785	NA	114800	148648	120890	162160
_[Acetyl (Protein N-term)]MDTPSPDPLPS[Phospho (STY)]PLPGEEEK_.2	NA	NA	NA	NA	NA	NA	NA	NA	NA	NA	NA	NA	117094	NA	NA	NA	NA	101550	NA	NA	NA	NA	NA	48809.4	NA	NA	NA	NA	89010.3	63763.5	87970.9	NA	NA	NA	NA	NA	4785.28	NA	70769.9	68683.4	64446.7	NA	57691.6	NA	NA	49274.7	NA	NA	68852
_[Acetyl (Protein N-term)]MDVAES[Phospho (STY)]PER_.2	68196.4	NA	14587.9	23648.7	70509.8	27906.8	25070.9	19336.1	24490.9	14651.7	21070.3	10727.9	81758.2	21010.9	22908.5	14412.2	24357.7	10693.4	43108.2	30447.1	24373.1	11989.1	13050.6	21425.9	71708.4	NA	6967.71	27850.6	62313.2	13665.1	49896.3	39703.7	41312.1	14384.9	26983.4	36525.8	7147.52	44939.4	33752.7	44634.9	42803.9	71553.2	49633.8	44726.1	16212.3	32120.6	63129.6	28608.2	61758.9
_[Acetyl (Protein N-term)]MDVAES[Phospho (STY)]PERDPHS[Phospho (STY)]PEDEEQPQGLS[Phospho (STY)]DDDILR_.4	NA	NA	NA	NA	NA	NA	NA	NA	29059.8	NA	NA	NA	NA	NA	NA	NA	NA	NA	NA	NA	NA	NA	NA	NA	NA	NA	NA	NA	NA	NA	NA	NA	NA	NA	NA	NA	NA	NA	NA	37961.9	NA	NA	NA	NA	NA	27824.5	36745.8	29873.9	NA
_[Acetyl (Protein N-term)]MEAAGS[Phospho (STY)]PAATETGK_.2	NA	NA	NA	NA	37008.7	30406.1	35904.3	44085.9	27431.2	25629.9	49081.5	39200.9	27788.9	NA	NA	NA	NA	NA	30262.4	29288.3	29147.5	33080.3	NA	35028.6	24264	19014.2	18214.3	NA	NA	NA	20650.3	NA	29143.4	NA	26056.7	31047.3	8346.57	16724.2	26721.7	16671.7	16814.3	24689.7	22515.4	33677.8	39211.1	37811.2	54750.3	46768.6	NA
_[Acetyl (Protein N-term)]MEDLDQ[Deamidation (NQ)]S[Phospho (STY)]PLVSSSDS[Phospho (STY)]PPRPQPAFK_.3	90735.8	24667.6	80363.8	91696.6	112693	180067	177351	216640	172960	137208	170990	107774	96372.6	118762	101410	79240.9	79463.9	76854.9	111166	108132	110816	131659	150980	141030	88545.2	113770	71506.9	90866	57084.6	70349.4	81861.3	81137.3	62365.6	81244.3	76047	73995.2	10515.6	80928.9	96017.9	105759	86461.1	101078	91850.3	95465.4	160174	163457	227804	130634	62559.4
_[Acetyl (Protein N-term)]MEDLDQ[Deamidation (NQ)]SPLVSSSDS[Phospho (STY)]PPRPQ[Deamidation (NQ)]PAFK_.3	398713	327047	242924	283079	445954	262431	335182	382008	272533	240928	307320	237961	415674	375575	269353	236121	411363	226299	293603	292060	252416	242344	284900	308368	415829	318788	236262	320270	318139	240575	300588	263283	203175	181669	194970	182098	2.82296e+06	180368	325099	266720	177211	238806	262510	226080	7956186	224724	306514	251662	6389170
_[Acetyl (Protein N-term)]MEDLDQ[Deamidation (NQ)]SPLVSSSDS[Phospho (STY)]PPRPQPAFK_.3	13175912	377087	9463983	10527234	13979620	9444401	12848135	14381616	11688641	8480454	8978860	7988265	13011270	11062454	10378397	9158243	14454240	8515505	9070817	11966279	8163618	9397872	10159769	8732507	13670930	10338359	7965067	10695200	10568759	8879498	10557135	9304401	7141442	6553399	6.21525e+06	6.91118e+06	3.30119e+06	6713829	10501849	10055056	8.28215e+06	8335957	8568004	8529702	9207214	8557875	9877666	9337640	7.5643e+06
_[Acetyl (Protein N-term)]MEDLDQS[Phospho (STY)]PLVSSSDS[Phospho (STY)]PPRPQPAFK_.3	183258	28314.9	140427	126345	196641	233346	252201	268281	240318	192174	191225	137386	191536	203739	172781	124339	203339	138725	169339	157372	171196	191288	174790	178660	153843	190445	125925	138634	119378	145743	142470	123512	117935	129828	102358	109109	36079.1	135892	180823	195974	131225	163681	138768	165856	200857	219214	322574	188086	110528
_[Acetyl (Protein N-term)]MEDLDQSPLVSSSDS[Phospho (STY)]PPRPQ[Deamidation (NQ)]PAFK_.3	367498	299229	224749	261563	412242	248643	309694	355934	251459	223914	7194427	217976	383032	347453	243153	216305	11642702	202812	168443	9465921	231307	228376	264034	6.99271e+06	384393	297114	210380	297254	294993	219119	276372	240210	185872	166581	180802	163361	84739.3	164684	298313	247499	165425	216085	244653	207873	213264	207904	280841	227706	5.90019e+06
_[Acetyl (Protein N-term)]MEDLDQSPLVSSSDS[Phospho (STY)]PPRPQPAFK_.3	12612851	363149	9136880	10028590	13479576	9038858	12295754	13793043	11347395	8159295	8754336	7615977	12577248	10531628	9931911	8751348	13898432	8.16996e+06	8684272	11484754	7926890	8992136	9727041	8454825	13180007	9867539	7597700	10127954	10075963	8426560	10044606	8899107	6900342	6.30433e+06	5953104	6658297	3125529	6396293	10232405	9683082	7870798	8017583	8.323e+06	8213365	8819452	8.24659e+06	9538950	9070654	7148215
_[Acetyl (Protein N-term)]MEDS[Phospho (STY)]M[Oxidation (M)]DMDMSPLRPQ[Deamidation (NQ)]N[Deamidation (NQ)]YLFGC[Carbamidomethyl (C)]ELK_.3	NA	NA	139949	128347	291368	141968	96872.7	212585	NA	77937.3	140903	114540	128901	143037	148284	258097	NA	NA	158733	146928	NA	160537	124376	110659	224831	135809	123890	170918	250524	NA	187749	NA	163493	157406	145924	129640	31817.3	NA	252722	124936	133285	135604	156715	156014	104264	102370	82650.8	149035	144084
_[Acetyl (Protein N-term)]MEDS[Phospho (STY)]M[Oxidation (M)]DMDMSPLRPQ[Deamidation (NQ)]NYLFGC[Carbamidomethyl (C)]ELK_.3	NA	NA	311251	209959	460994	270223	161261	512654	163990	68863.6	318323	176164	437052	247009	60161.9	224484	250929	255408	168010	255262	NA	222703	255893	153289	244987	245423	208169	239218	404351	180678	279313	361608	338706	296514	318595	146216	31195.4	138059	616848	169425	268504	249950	273694	264731	197657	247976	111689	168788	316067
_[Acetyl (Protein N-term)]MEDS[Phospho (STY)]M[Oxidation (M)]DMDMSPLRPQNYLFGC[Carbamidomethyl (C)]ELK_.3	326309	NA	286647	206505	443346	258958	158812	504549	128373	69453.2	315704	180705	762834	247942	61085.4	224385	215635	247071	259894	249706	344717	209380	242681	140398	216778	234546	201171	227169	379987	174268	274064	352085	336247	282888	304760	135569	NA	219590	599323	165712	237721	241563	263177	252280	198390	240900	102592	152923	293078
_[Acetyl (Protein N-term)]MEDS[Phospho (STY)]MDM[Oxidation (M)]DMSPLRPQNYLFGC[Carbamidomethyl (C)]ELK_.3	325149	NA	290630	226556	513070	271020	177885	506216	129320	81987.4	312930	196124	760565	271424	78761.4	241830	229934	259769	352852	263770	217767	251859	241010	167674	233009	246395	220289	269841	444346	178858	321215	351270	351501	306666	314250	177951	68061	128066	591625	194399	258524	240765	296011	282377	210746	241846	115280	199452	287541
_[Acetyl (Protein N-term)]MEDS[Phospho (STY)]MDMDMS[Phospho (STY)]PLRPQ[Deamidation (NQ)]NYLFGC[Carbamidomethyl (C)]ELK_.3	NA	NA	51527.1	NA	NA	NA	NA	NA	81797.3	30730.4	NA	NA	NA	NA	NA	NA	NA	NA	NA	NA	82844.4	NA	NA	NA	77357.2	NA	NA	NA	NA	NA	NA	NA	NA	45290.8	NA	NA	9100.85	NA	NA	NA	306026	NA	NA	NA	NA	NA	NA	NA	NA
_[Acetyl (Protein N-term)]MEDS[Phospho (STY)]MDMDMSPLRPQ[Deamidation (NQ)]NYLFGC[Carbamidomethyl (C)]ELK_.3	348670	NA	185636	NA	NA	161390	33493.6	402726	31653.9	324987	196524	NA	305287	NA	244364	74544.8	90924.3	214320	360695	302863	172355	224073	NA	NA	68002.1	178807	NA	319609	512044	124219	374552	128948	52379.8	291314	247628	213979	64808.6	74411.6	223647	283023	114061	33947.4	90569.3	299275	NA	NA	219485	325542	78371.2
_[Acetyl (Protein N-term)]MEDS[Phospho (STY)]MDMDMSPLRPQNYLFGC[Carbamidomethyl (C)]ELK_.3	742282	NA	445241	56620.6	167155	182863	NA	922187	68983.5	237799	525612	NA	724171	NA	271324	139184	208074	462308	250256	195840	465002	177681	85002.5	91456	149148	410122	142518	357178	678381	286908	477588	352983	99733	516530	550943	141029	36222.5	219326	558254	198035	135976	77123.7	110009	475185	70648.8	75595	146123	211334	218136
_[Acetyl (Protein N-term)]MEDSM[Oxidation (M)]DM[Oxidation (M)]DMS[Phospho (STY)]PLRPQNYLFGC[Carbamidomethyl (C)]ELK_.3	123215	NA	105800	72001.8	197828	163602	162345	85971.1	74129.9	117298	69233	117152	154433	235366	89179.5	121342	125057	66171.7	134963	128182	102879	82939.2	113155	106425	186771	102443	105792	140245	172482	85767	129365	127360	176987	171095	148860	154433	35759.3	85096.1	79792.3	155409	165131	128604	107508	95406.8	83063.7	108466	209576	95219.5	35487
_[Acetyl (Protein N-term)]MEDSM[Oxidation (M)]DMDM[Oxidation (M)]S[Phospho (STY)]PLRPQNYLFGC[Carbamidomethyl (C)]ELK_.3	102471	NA	90494.9	94202.7	157856	134807	129172	69298.6	56192.8	63056.5	50926.3	85737	124942	123084	82734.6	89647.5	104859	66031.9	118994	97241	83470.8	66255.4	47255.1	80480.4	108898	53436.1	89409.9	101969	159900	104647	103135	107144	155894	119971	123833	105579	35376.7	76131.9	58643	123430	128211	80239.1	110649	74127.5	83455.9	46226.4	96914.2	67529.1	107657
_[Acetyl (Protein N-term)]MEDSM[Oxidation (M)]DMDMS[Phospho (STY)]PLRPQ[Deamidation (NQ)]N[Deamidation (NQ)]YLFGC[Carbamidomethyl (C)]ELK_.3	NA	NA	106261	92964	219151	96292.7	75123.9	153260	NA	46137.9	75053	81630.3	90646	98868.8	109032	91552.8	NA	NA	112280	109984	NA	70325.7	86307.5	81345.6	NA	102487	85899.8	120112	177482	NA	132220	NA	120146	112352	109893	97385.7	28804.3	38356.4	182235	89788.8	105534	103574	126666	NA	76382.8	78583.7	106214	108086	112598
_[Acetyl (Protein N-term)]MEDSM[Oxidation (M)]DMDMS[Phospho (STY)]PLRPQNYLFGC[Carbamidomethyl (C)]ELK_.3	631952	NA	234122	200207	388681	224715	143447	411637	82800.7	63724.3	241384	162710	332132	228724	211790	210162	185090	209239	386990	235597	248606	244203	183215	152807	179958	206320	185290	260447	413345	139103	299536	271867	293514	264609	260600	184518	42692.8	98302.5	465958	173614	265025	194230	265309	248264	173021	191762	93653	206291	224449
_[Acetyl (Protein N-term)]MEDSMDM[Oxidation (M)]DM[Oxidation (M)]S[Phospho (STY)]PLRPQNYLFGC[Carbamidomethyl (C)]ELK_.3	102471	NA	86582.9	94202.7	157856	134807	129172	69298.6	32352.8	10178.7	50926.4	82218.1	124942	123084	82734.6	85987.5	104859	53416.1	118994	97241	83470.8	66255.4	47255.1	80480.4	108898	80725.4	116251	101970	161894	104647	103134	107144	156804	143520	123833	105087	35376.7	76131.9	58643.1	114633	130551	42647.1	53668.2	92080.8	83455.9	60913.9	49615.2	57943.7	42270.8
_[Acetyl (Protein N-term)]MEDSMDM[Oxidation (M)]DMS[Phospho (STY)]PLRPQNYLFGC[Carbamidomethyl (C)]ELK_.3	631952	NA	234122	200207	388681	224715	143447	411637	82800.7	63724.3	241384	162710	332132	228724	63080.4	210162	185090	209239	209997	235597	248606	244203	183215	152807	179958	206320	185290	260447	413345	139103	299536	271867	293514	264609	260600	184518	42692.8	98302.5	465958	173614	265025	194230	265309	248264	173021	191762	93653	206291	224449
_[Acetyl (Protein N-term)]MEDSMDMDMS[Phospho (STY)]PLRPQ[Deamidation (NQ)]NYLFGC[Carbamidomethyl (C)]ELK_.3	540769	NA	336308	177915	515326	304910	52333.3	635054	60106.2	412907	368467	115616	527591	88151.4	330732	133155	157464	342417	446592	474414	318797	291323	83733	189169	134936	301065	154490	440378	667828	219007	506597	236559	NA	433612	414947	270709	80144.5	145518	408130	362345	175013	95480.3	142539	435229	85948.9	93975	276842	390184	163531
_[Acetyl (Protein N-term)]MEDSMDMDMS[Phospho (STY)]PLRPQNYLFGC[Carbamidomethyl (C)]ELK_.3	551541	NA	313838	195474	342698	289154	51813.4	641047	45013.2	405375	351973	163299	529146	107465	342868	NA	154144	343684	436081	374934	333428	289236	60441.3	182510	88367.3	278527	77218.1	460197	690109	208282	533778	236006	87741.5	445211	398554	263362	69615.9	136525	381440	357679	182748	53721.1	NA	425289	68205.2	57715.1	258513	390119	138050
_[Acetyl (Protein N-term)]MEEAS[Phospho (STY)]EGGGN[Deamidation (NQ)]DRVR_.2	NA	NA	NA	NA	NA	NA	NA	NA	NA	NA	NA	NA	NA	NA	NA	NA	NA	NA	NA	NA	NA	NA	NA	NA	NA	NA	NA	NA	NA	NA	NA	NA	6276.83	NA	NA	NA	NA	NA	NA	NA	NA	NA	10877.4	18590.5	NA	10582.6	NA	NA	NA
_[Acetyl (Protein N-term)]MEEAS[Phospho (STY)]EGGGNDRVR_.2	8075.74	NA	NA	NA	NA	8628.6	10023	14702.9	NA	NA	10938.8	9419.83	NA	NA	NA	NA	27979.3	15529.5	NA	8904.4	NA	17791.8	13487.6	20440.2	9497.4	12958.7	12285.8	NA	NA	12145.8	NA	NA	NA	13610.1	NA	NA	NA	NA	11982.6	NA	NA	4060.18	NA	NA	12928.1	11846.3	13584.1	NA	NA
_[Acetyl (Protein N-term)]MEEEIAALVIDN[Deamidation (NQ)]GS[Phospho (STY)]GMC[Carbamidomethyl (C)]KAGFAGDDAPR_.3	NA	NA	NA	NA	NA	NA	NA	NA	NA	NA	NA	NA	123680	NA	NA	NA	NA	NA	NA	NA	NA	NA	NA	NA	NA	NA	NA	NA	NA	NA	NA	NA	NA	NA	NA	NA	NA	NA	NA	NA	NA	NA	NA	NA	NA	NA	NA	NA	NA
_[Acetyl (Protein N-term)]MEEIPAQEAAGS[Phospho (STY)]PR_.2	169473	NA	102902	127029	163781	132989	135891	159171	146228	105769	126857	143357	203466	192896	140577	112230	243845	149508	151645	169009	201329	152653	124429	166497	212397	169030	113600	136647	199183	169508	173938	177105	161530	165820	132214	134089	85221.2	197337	184015	214528	138289	236223	197427	209047	190684	184069	219696	192994	199618
_[Acetyl (Protein N-term)]MEERPAETNANVDNSAS[Phospho (STY)]PSVAQLAGR_.3	NA	NA	NA	NA	102352	103208	NA	95164	88575.8	74693.5	NA	NA	71832.2	82064.9	NA	62997	81299	68994.6	90550.2	84783	139985	89670.6	101896	127975	NA	104790	53192.9	NA	NA	52035.7	NA	NA	55745.4	75608.2	NA	NA	37336.5	73452.2	49857.7	65841.4	64984.6	83181.6	NA	84428.3	105778	106334	124894	122480	92371.1
_[Acetyl (Protein N-term)]MEGDGS[Phospho (STY)]DPEPPDAGEDSK_.2	173995	NA	198361	148758	161192	189853	153354	220856	173297	129628	172596	159136	260293	190940	160942	171586	174920	125863	161497	143328	194379	159339	128727	175522	185348	140476	156765	145483	157212	NA	142608	197714	133445	207025	NA	NA	NA	124259	277842	176240	129319	149411	148915	172873	222473	178478	210717	NA	168054
_[Acetyl (Protein N-term)]MEGGLADGEPDRTS[Phospho (STY)]LLGDSK_.3	23949.6	NA	15849.7	14600.5	20139.3	10941.2	9650.46	12129.7	NA	10557.4	10525.1	13039	21545.3	16046.6	12653.7	8922.36	25718.7	12540.6	7466.91	8765.11	NA	NA	6833.02	7781.93	29898.9	29876.8	17236.9	18180.9	21345.6	9167.27	9383.37	8746.02	9346.34	NA	4442.11	7170.71	6115.32	16152.5	14266.9	12618.2	NA	10161.7	11470.7	9765.1	12425.5	10044.4	10157.6	12002.1	12413.7
_[Acetyl (Protein N-term)]MEGISNFKT[Phospho (STY)]PSK_.2	NA	NA	NA	NA	27680.8	NA	29816.3	31856	24039	NA	NA	NA	NA	NA	NA	NA	NA	NA	NA	NA	28048.4	NA	NA	20544.8	NA	NA	NA	NA	NA	NA	NA	NA	NA	NA	NA	NA	NA	NA	NA	NA	NA	NA	NA	NA	22252.7	19811.3	NA	27278.3	NA
_[Acetyl (Protein N-term)]MEGQS[Phospho (STY)]VEELLAK_.2	NA	NA	NA	NA	7836.98	NA	5322.43	5387.34	NA	4127.28	6588.79	10896.5	9784.81	8243.05	6656.56	NA	15121.7	9741.25	8618.01	6890.18	6040.52	NA	NA	6245.11	NA	NA	NA	5923.5	15563.5	9416.86	7702.35	8421.28	15479.4	19053.3	14526.4	21912.9	NA	NA	NA	NA	NA	NA	NA	NA	NA	NA	NA	NA	NA
_[Acetyl (Protein N-term)]MELILSTS[Phospho (STY)]PAELTLDPAC[Carbamidomethyl (C)]QPK_.3	NA	NA	10089.6	NA	NA	NA	NA	NA	13102.1	NA	NA	NA	15546.7	14285.2	NA	10057.3	14666.8	NA	NA	NA	15065.8	6800.24	18306.4	NA	NA	NA	NA	NA	NA	11103.1	NA	NA	NA	11976.9	NA	NA	NA	9928.04	37080.7	NA	NA	8148.57	NA	NA	NA	NA	NA	NA	12872.9
_[Acetyl (Protein N-term)]MENSSAASASSEAGSSRS[Phospho (STY)]QEIEELER_.3	NA	NA	NA	NA	NA	NA	NA	65602.4	NA	NA	NA	21682.3	NA	NA	NA	NA	NA	NA	NA	NA	NA	NA	NA	NA	NA	NA	NA	NA	NA	NA	NA	NA	NA	NA	NA	NA	NA	NA	NA	NA	NA	NA	NA	NA	NA	NA	NA	NA	NA
_[Acetyl (Protein N-term)]MEPETALWGPDLQGPEQS[Phospho (STY)]PNDAHR_.3	77593.8	NA	52624.8	56473	78408.7	54308.6	53461.7	70843.6	60170	75509.4	63847.7	96956.7	72738.7	83603	70435.6	61710	109233	69792.9	63048	59097.3	58405.2	72455.7	59895.8	56946.9	78029	72393.2	57797.7	61656.1	90771.4	81731.1	67492.3	67846.3	70163.3	88910.9	52437.3	60802.2	8266.44	47212.2	111277	84463.1	70965.5	72617.6	88635.8	101453	93198.4	73978.1	127332	91749.8	83879.1
_[Acetyl (Protein N-term)]MEPIGARLS[Phospho (STY)]LEAPGPAPFR_.3	NA	NA	NA	NA	NA	NA	6293.06	NA	NA	NA	NA	NA	NA	NA	15654.8	NA	NA	NA	NA	NA	NA	NA	NA	7578.58	17203.8	NA	NA	NA	NA	NA	NA	NA	NA	NA	NA	NA	NA	NA	NA	NA	NA	NA	NA	NA	NA	NA	NA	NA	NA
_[Acetyl (Protein N-term)]MEPPGGSLGPGRGT[Phospho (STY)]R_.2	87882.3	NA	62565.9	76898.3	159384	68527.9	52188.9	89838.5	69922.2	NA	NA	NA	NA	NA	64264.3	71186.6	120349	82181.9	NA	72642.3	85120.8	NA	44126.8	NA	153436	124803	73540.1	119114	109306	NA	NA	52015.9	69322.7	NA	37158.1	NA	41205.7	59051.5	149790	111550	NA	73273.3	NA	80921.1	74451	93984.3	100906	NA	64200.4
_[Acetyl (Protein N-term)]MEPPGGSLGPGRGT[Phospho (STY)]RDK_.3	71695.8	NA	73128.3	55993.5	160462	66126.6	43390.5	111393	77860.5	31952.2	36825.8	24441.5	103808	61596.2	45462.8	69449.4	85606.7	60781.1	18564.2	76064	70522	33415.2	49621.1	35528.5	152159	112179	76106.1	100295	80917.2	39026.1	26552.9	41367.6	38008.8	NA	33894.4	29432.1	25772.2	54209.6	160807	123352	30262.3	59955.8	39824.5	45764	63791.9	71120	75385	60734.4	49644.2
_[Acetyl (Protein N-term)]MEQS[Phospho (STY)]PPPAPEPTQGPTPAR_.3	NA	NA	24537.7	18834.1	10744.3	NA	NA	25521.4	NA	NA	NA	NA	75782.1	68888	36594.4	38166.2	NA	NA	NA	26632.4	71428	56959.2	35488.5	59928.5	20294.1	NA	26898.4	26112.8	NA	NA	NA	7343.52	NA	18736.1	NA	NA	10601.3	34981.4	48474.1	44358.3	30019.1	29149.4	NA	36762.7	36688.1	30221.2	48083.2	44739.2	70026.1
_[Acetyl (Protein N-term)]MERPEEGKQS[Phospho (STY)]PPPQPWGR_.3	103357	NA	59862.4	NA	121643	72663	70450.2	97745.8	69332.6	77706.4	68855.8	93865.2	174465	136284	101715	86775.2	225755	126976	105977	106120	113108	98457.7	76376	NA	140234	105716	55895.2	62097.4	136598	116630	90868	88859.1	121880	130338	62847.7	81088.5	67826	152151	215599	164815	162686	188711	225392	264435	209780	182452	188495	219338	158233
_[Acetyl (Protein N-term)]MES[Phospho (STY)]GAYGAAK_.2	NA	NA	NA	NA	NA	NA	NA	NA	NA	NA	NA	NA	NA	NA	NA	NA	NA	NA	NA	NA	NA	NA	NA	NA	NA	19340.6	35201	NA	NA	NA	NA	NA	NA	NA	NA	NA	NA	30212.2	74433	NA	NA	NA	NA	NA	NA	NA	NA	NA	NA
_[Acetyl (Protein N-term)]MES[Phospho (STY)]GDEAAIER_.2	49238.9	NA	33696.9	38883.5	49603.5	43603.5	44237.3	56211.7	49987.2	32705.2	55448.4	62433.1	58383.1	49305.4	32395	26496.8	63669.2	40456.7	40770.8	42916.8	53466.5	47645	31589.4	57645.3	53898.3	31880.9	39748.1	36847.7	47807.6	47237.6	39826.8	41633.6	37780.1	29020.4	31430.4	28064	5032.4	23334	48847.9	33666.2	22100.5	37316.4	28920.7	43580.2	36506	40393.1	47737.2	59342.1	16350.7
_[Acetyl (Protein N-term)]MES[Phospho (STY)]Q[Deamidation (NQ)]EPTESSQN[Deamidation (NQ)]GK_.2	111278	NA	29010.2	NA	91177.3	NA	100611	NA	80106	43811.8	38036.8	NA	39802.8	52173.4	35456.2	22161.7	77031.1	31079.5	63983.7	92407.8	94599.2	134592	NA	37578.6	39694.6	NA	95088	NA	55936.1	35847.3	34243.1	39326.7	103118	54830.7	NA	148956	14008.2	103471	122802	38201.2	64253.3	176642	97811.6	132342	80143.2	135314	208202	154656	88196.1
_[Acetyl (Protein N-term)]MES[Phospho (STY)]QEPTESSQ[Deamidation (NQ)]NGK_.2	459195	14940.4	129374	69534.7	366841	112563	381702	302332	307695	142102	341434	331963	367203	201957	137109	91201.4	346978	110824	590659	366273	368616	471273	256105	330281	378402	197670	164991	84249.4	458963	326354	125484	175736	687953	383145	495728	317688	111914	397721	494842	341245	121887	717757	379870	484584	146474	515497	761985	580599	349956
_[Acetyl (Protein N-term)]MES[Phospho (STY)]QEPTESSQN[Deamidation (NQ)]GK_.2	221258	NA	201295	100051	190497	43615.8	205133	172583	54161.5	201493	213278	199153	174876	220001	62048.7	71153.4	170548	50366.9	288793	175069	172040	104299	134735	162780	196542	97748.3	180174	112638	100030	227546	208338	181775	438792	102421	343348	353391	54083.3	190018	229772	63920	114629	342345	187402	242935	143037	249336	389231	290620	76646.6
_[Acetyl (Protein N-term)]MES[Phospho (STY)]QEPTESSQNGK_.2	110219	NA	NA	33865.5	77242	53832.6	NA	NA	NA	94070	NA	NA	NA	114130	73721.5	NA	NA	NA	NA	67729.4	84367.9	150192	NA	NA	90623.1	56182.9	NA	NA	105621	79001.7	NA	52352.9	114368	95628.5	66795.8	76933	34683	NA	127129	NA	68214.4	190819	77865.6	101736	113719	157915	198853	134744	100673
_[Acetyl (Protein N-term)]MESADFYEAEPRPPM[Oxidation (M)]SSHLQS[Phospho (STY)]PPHAPSSAAFGFPR_.4	272470	NA	125094	169269	459578	187122	31077.8	298829	138093	160849	121937	225111	305969	186114	197853	128318	488707	210328	138685	245033	153820	174613	154885	202566	255836	102731	106492	125282	226833	99973.3	133043	127263	153281	167613	121479	173996	4759.32	59483.4	139948	80679.5	81038.1	17095.2	122845	119601	74638.9	74299.6	104621	133195	87220.7
_[Acetyl (Protein N-term)]MESADFYEAEPRPPMSSHLQ[Deamidation (NQ)]S[Phospho (STY)]PPHAPSSAAFGFPR_.4	393121	16945.1	207059	279037	665535	299697	420383	455286	217367	261862	201040	346846	457815	283098	304085	207173	677687	339008	226063	377343	242433	284526	250744	328860	380742	175796	184021	202903	338047	166749	212637	205115	237424	276228	199615	281926	38330.6	107127	214011	129766	133337	171224	201772	193624	119780	123325	166078	216102	149267
_[Acetyl (Protein N-term)]MESADFYEAEPRPPMSSHLQS[Phospho (STY)]PPHAPSSAAFGFPR_.4	393121	16862.1	205614	277425	665535	299697	420436	455286	217367	261678	197604	344628	456771	283098	303870	206726	677391	339008	223397	376364	241971	284231	250744	328874	378391	175396	182880	202903	337587	166657	212376	204930	234870	276228	198844	281595	38331.7	107127	212617	128537	133220	170292	201636	193624	118741	122834	165512	215658	148744
_[Acetyl (Protein N-term)]MESMAVATDGGERPGVPAGSGLSAS[Phospho (STY)]QRR_.3	NA	NA	NA	NA	NA	NA	NA	NA	NA	NA	NA	83819.5	NA	NA	NA	NA	97175.2	NA	NA	NA	NA	NA	NA	NA	NA	NA	NA	NA	NA	NA	NA	NA	NA	NA	NA	NA	NA	NA	NA	NA	NA	NA	NA	NA	NA	NA	NA	NA	NA
_[Acetyl (Protein N-term)]MESTLSASNMQDPSSS[Phospho (STY)]PLEK_.3	35821.6	NA	NA	NA	40508	31445.9	NA	NA	25836.9	28107.6	34082.6	NA	46458.7	46961.7	NA	NA	41896	30358.9	NA	31983	NA	NA	NA	42702.2	39981	25846.8	18270.7	NA	29651.3	26772.4	21723.4	27592.1	40661.9	58636	NA	NA	17742.2	44105.5	48020.6	46419.3	35416.4	40380.2	36516.9	31645.3	31787	29807.8	42943.7	33932.7	31753.5
_[Acetyl (Protein N-term)]MET[Phospho (STY)]PGASASSLLLPAASRPPR_.3	15540.3	NA	8308.11	10552.3	31040	8621.83	NA	14477.4	NA	7611.35	NA	NA	21440.3	15974.6	11661.8	10551	49425.8	13888.5	6898.95	11233	8666.73	NA	NA	7319.34	24659.9	16700.2	12383.2	9479.92	18915.5	NA	7969.21	6467.63	7128.54	NA	NA	5331.09	4859.6	NA	25161.4	17261.4	12144.3	NA	13937.8	16135.1	NA	11374.5	12888.3	17779.2	9791.18
_[Acetyl (Protein N-term)]METDESPS[Phospho (STY)]PLPC[Carbamidomethyl (C)]GPAGEAVMESR_.3	90545.5	NA	56959.5	69987.2	110557	77762.7	81095.8	92688.5	78848	75431.7	87020	66070.5	100623	113710	62950.5	53230	120405	71687.9	71323.1	83740.5	66653.5	78250.8	69342.3	67913.2	100711	93330.9	82817.7	75724.8	110696	84461.7	70120.3	80017.2	78642.4	62707.4	42153.6	48458.5	30820.7	92429	106163	90012.4	95415.4	105430	114151	95378.9	100430	89886.7	106269	98723.9	83196.6
_[Acetyl (Protein N-term)]METMAS[Phospho (STY)]PGK_.2	40276.1	NA	32330.8	37126.1	66839.1	51327.6	67600.8	73787.6	48835.5	31206	43831.7	40543.3	45837.9	36046.5	24362	21235.2	51226.7	30933	49141	42631.8	62364.4	54950.6	31281.2	48257.4	47690.5	42837.1	31839.7	41572.1	39104.3	21993.6	25228.7	21549.2	28867.4	30521	17368.8	21553.2	10148.3	26604.2	48246.6	33921.3	32635.2	54292.4	40244.9	53966	70093.5	67872.6	75099.4	78504.7	21646.1
_[Acetyl (Protein N-term)]METPFYGDEALSGLGGGASGSGGSFAS[Phospho (STY)]PGR_.3	NA	NA	NA	NA	148511	NA	NA	NA	NA	NA	NA	31916.1	NA	NA	NA	NA	NA	NA	NA	NA	NA	NA	NA	77626.8	NA	NA	NA	NA	NA	NA	NA	NA	37438.7	NA	NA	NA	NA	NA	NA	NA	NA	NA	21056.2	NA	NA	NA	34094.1	22211.9	NA
_[Acetyl (Protein N-term)]METPTPLPPVPAS[Phospho (STY)]PTC[Carbamidomethyl (C)]N[Deamidation (NQ)]PAPR_.3	NA	NA	17475.8	31717.9	54047.2	39985.1	NA	45159.8	29030	25249.8	24172.9	23061	50231.9	NA	NA	NA	59472.3	NA	NA	28323.2	NA	NA	34546.3	NA	35017.8	NA	NA	NA	NA	NA	19284.4	16926.8	NA	28158.1	18714.6	NA	NA	NA	33864.2	NA	18985.3	NA	26182.6	27442.2	NA	21064.6	28616.6	30889.1	20512.1
_[Acetyl (Protein N-term)]METPTPLPPVPAS[Phospho (STY)]PTC[Carbamidomethyl (C)]NPAPR_.3	44216.7	NA	18679	27397	56768.8	34900.7	33687.7	43882	32694	23489	19110.5	23728.2	51140.4	44106.4	29387.7	19219.8	69173.3	20993.1	25681.7	31137.9	28247.7	27418.3	22682.2	23874.9	43622.8	21733	19877.6	17083.4	26364.3	20535.3	18601.3	18175.1	28622.7	30597.3	18911.2	20877.9	6806.02	20150	46299.6	27298.1	23467.4	21459.9	27172.4	26439.4	18220.9	20569.1	27080.6	28430.8	21736.4
_[Acetyl (Protein N-term)]METVISSDSS[Phospho (STY)]PAVENEHPQETPESNNSVYTSFMK_.4	13645.2	NA	NA	10253.3	10809.5	8671.67	11295.8	12091	NA	NA	9878.65	8034.56	14388.6	NA	9989.26	11094.3	13295.6	NA	9318.22	21649.3	NA	NA	11156.7	10844.6	12006.2	NA	NA	8884.58	10991.7	11253.7	8324.12	NA	8011.18	NA	NA	NA	NA	4957.8	NA	10250.2	NA	8266.35	11176.2	8663.22	10016.4	13447.8	13800	11193.4	5490.7
_[Acetyl (Protein N-term)]MEVAEPS[Phospho (STY)]S[Phospho (STY)]PTEEEEEEEEHS[Phospho (STY)]AEPRPR_.3	NA	NA	NA	NA	NA	NA	NA	NA	NA	NA	NA	NA	NA	NA	NA	NA	NA	NA	NA	NA	NA	NA	NA	NA	NA	NA	NA	NA	NA	NA	NA	NA	NA	NA	NA	NA	NA	NA	NA	NA	NA	NA	NA	NA	NA	NA	NA	61169.2	NA
_[Acetyl (Protein N-term)]MEVAEPS[Phospho (STY)]S[Phospho (STY)]PTEEEEEEEEHSAEPRPR_.3	35016.1	NA	152456	116203	36582.6	62325.1	114842	160141	189867	169837	99336.5	94475.9	79371.2	NA	115458	48209.4	NA	105638	42728.1	44460.7	196130	123764	114926	88388.1	72287.4	NA	125629	103176	NA	NA	28621.7	33940.6	24600	NA	44461.2	19284.5	NA	NA	263052	139143	29340.1	NA	74505.1	176268	160485	221836	284652	253507	NA
_[Acetyl (Protein N-term)]MEVAEPSS[Phospho (STY)]PTEEEEEEEEHSAEPR_.3	260991	NA	137636	169182	260687	135269	117583	126089	138593	138032	128591	167087	372334	187958	160152	153243	245211	131458	160212	164268	158032	121455	125194	162854	339271	72129.7	120949	160124	337870	138340	181766	157064	221814	108007	127035	130760	NA	337540	250781	260252	237373	367157	297233	292465	186137	201199	237004	209603	457818
_[Acetyl (Protein N-term)]MEVAEPSS[Phospho (STY)]PTEEEEEEEEHSAEPRPR_.3	1777857	21885.9	1.32065e+06	1515262	1936279	1.04271e+06	1.40342e+06	1.55296e+06	1539886	1.49577e+06	1528823	1.951e+06	2219764	2.09015e+06	1.69326e+06	1.62564e+06	2.19746e+06	1.49532e+06	1.20066e+06	1.46515e+06	1.67008e+06	1.51642e+06	1.08564e+06	1.68235e+06	2246836	352597	1.32495e+06	1.35112e+06	1.82098e+06	1.22626e+06	1.26842e+06	1.28111e+06	1.12806e+06	621657	1.09186e+06	1.19429e+06	NA	362679	3.31536e+06	1.98814e+06	1.56368e+06	705734	1.90754e+06	2.35666e+06	1.74989e+06	1768219	1.78048e+06	2.92482e+06	1.25817e+06
_[Acetyl (Protein N-term)]MEVAEPSSPT[Phospho (STY)]EEEEEEEEHSAEPR_.3	260991	NA	137636	169493	260559	135269	117583	126089	138593	136721	124423	166976	372122	187923	161445	153243	243587	130073	160212	164021	155013	121455	121512	162854	339271	72129.7	119589	159095	337870	138340	181766	157064	221007	108007	127035	130622	NA	337335	249732	260622	236514	367157	292636	290853	185204	198770	236378	209514	457361
_[Acetyl (Protein N-term)]MEVAEPSSPT[Phospho (STY)]EEEEEEEEHSAEPRPR_.3	1.12245e+06	13803	841399	889492	1.16697e+06	593501	846849	1.02574e+06	945944	993448	1.00807e+06	1.24164e+06	1.60637e+06	1.31591e+06	1.20879e+06	1.01656e+06	1448617	926294	724813	888633	1.08242e+06	938759	682222	1025878	1.49741e+06	206632	883880	767317	1.05828e+06	720708	761213	779863	646862	363547	621422	695717	NA	193248	2.47881e+06	1.42294e+06	924110	405634	1168095	1.62094e+06	1.18873e+06	1.2391e+06	1.42299e+06	1.99207e+06	723967
_[Acetyl (Protein N-term)]MEVKPPPGRPQPDS[Phospho (STY)]GR_.3	1.23615e+06	29332.9	841596	913680	2.0533e+06	1.69167e+06	2.06297e+06	2.41559e+06	2.05039e+06	1.70517e+06	1.5128e+06	1158239	2.32954e+06	1283966	978897	865720	1.24828e+06	817773	1.38392e+06	1.2861e+06	2.38392e+06	1.39258e+06	1.36034e+06	1.57872e+06	1.6803e+06	1123813	696585	956040	828536	565215	733600	640403	1.00039e+06	1.01527e+06	656463	800749	470324	856983	1.64786e+06	1.25642e+06	1.1991e+06	1268599	1.56593e+06	1.98622e+06	1.78727e+06	1.89457e+06	2.5961e+06	2.58359e+06	841466
_[Acetyl (Protein N-term)]MEVS[Phospho (STY)]PLQ[Deamidation (NQ)]PVNENMQVNK_.2	133604	NA	106685	154712	261657	259456	333443	337387	209592	142641	171513	178025	238055	150812	113343	136809	147098	127301	230094	249605	299433	269826	242165	275581	149851	171099	101673	184718	97384.7	79657.3	89240	79876.7	93688.6	94869	70690.6	76793.3	51976.7	151704	164043	173061	191571	198374	202073	219839	279418	288722	295009	288806	117515
_[Acetyl (Protein N-term)]MEVS[Phospho (STY)]PLQPVNEN[Deamidation (NQ)]MQVNK_.2	112654	NA	97933.5	132647	236398	235598	305978	300717	191861	131512	151984	157172	206954	134228	100632	115237	131772	111409	195769	221808	270920	244772	216246	243464	127585	151897	95203.7	156655	90257	78292.5	85272.6	80505.7	86772.4	82288.1	70009.6	69275.2	42958	134756	146345	153708	169324	169823	181714	193041	250308	256954	265488	252460	101445
_[Acetyl (Protein N-term)]MEVS[Phospho (STY)]PLQPVNENM[Oxidation (M)]QVNK_.3	54452.3	NA	22723.9	32102	63757	38408.2	43192.4	40426.4	31552	NA	NA	36946.2	65489.2	47294.5	29766.6	26986.5	60938.4	39570.5	37121.6	28710.4	55802.4	NA	26654.9	32140.2	62251.6	34320.6	21618.8	21186.8	44450	31301	35361.2	37510.4	42864.7	50966.8	36624.1	43218.7	NA	11727.2	NA	23348.4	NA	20939.6	NA	NA	NA	19599.9	31925.3	26550.2	NA
_[Acetyl (Protein N-term)]MEVS[Phospho (STY)]PLQPVNENMQ[Deamidation (NQ)]VNK_.3	33296.2	NA	15729.4	34551.6	50385.2	44240	49022.4	52173.7	33518.5	24687.1	23589.9	26249.4	47062.7	28943.6	18466.3	17188.3	53585.1	27518.1	28805.2	37567.5	48852	42356.4	37622.2	31757.9	50677.5	30316.4	18674.1	26309.3	NA	NA	NA	NA	NA	26137.6	14183.5	10609.6	7272.63	21591.9	28221.6	30502.8	23893.5	26642.6	27298.8	35712.3	44798	39468.8	43481.7	47430.6	18614.1
_[Acetyl (Protein N-term)]MEVS[Phospho (STY)]PLQPVNENMQVNK_.2	147473	NA	117904	173056	307572	305675	393877	396207	245212	165157	192024	200841	270436	164428	125848	141096	168562	143886	259914	288607	351064	313413	279718	319355	167702	195876	114943	208126	108307	89704.2	102342	90951.8	103357	103400	80309.1	83043.2	59149.4	174630	183484	198648	214873	229301	237758	250388	324696	336956	338700	336956	131494
_[Acetyl (Protein N-term)]MFPAAPS[Phospho (STY)]PR_.2	7250.41	NA	4078.96	8321.15	17329.7	15214.5	16572.1	19895.7	11795.1	10135.8	10046.9	10930.8	9556.53	8727.18	5371.72	6403.17	10465.4	6740.69	10542.5	10536.2	11482.4	10789.5	10225	11005.4	9397.62	7151.02	4082.85	8532.17	7912.1	5259.17	6872.84	5344.88	6751.3	7312.96	4599.01	6184.31	995.578	4573.22	7947.01	5403.54	5992.73	9212.36	6488.13	8746.69	10824.3	11827.7	15212.7	13043.5	2594.91
_[Acetyl (Protein N-term)]MFRNS[Phospho (STY)]LK_.2	NA	NA	NA	NA	NA	NA	NA	NA	NA	NA	NA	NA	NA	NA	NA	NA	NA	NA	NA	NA	NA	NA	NA	NA	NA	NA	NA	NA	NA	NA	NA	NA	NA	NA	NA	NA	NA	NA	NA	NA	NA	NA	NA	NA	NA	NA	NA	NA	NA
_[Acetyl (Protein N-term)]MFSVES[Phospho (STY)]LER_.2	2312.75	NA	NA	NA	NA	NA	NA	NA	NA	NA	NA	NA	NA	NA	NA	NA	NA	NA	NA	NA	NA	NA	NA	NA	2805.54	NA	NA	NA	NA	NA	NA	NA	NA	NA	1262.18	NA	NA	NA	NA	NA	NA	NA	NA	NA	NA	NA	NA	NA	NA
_[Acetyl (Protein N-term)]MHFSIPETES[Phospho (STY)]R_.2	90921.9	NA	59264.9	63370.8	114116	63356.6	81478.4	102605	59632.6	48617.7	58857.8	67687.6	88003.5	119564	63668	53752.9	219298	98499.7	71601.7	74040.7	117502	73604.6	68450	52325.7	95454.5	293973	90883.1	59094.9	127301	79726.2	78858.1	85502.2	158878	190766	111199	116792	NA	29183.8	NA	NA	52040.3	NA	48889.8	NA	36237.5	50198.4	102329	NA	37986.3
_[Acetyl (Protein N-term)]MHGHGGYDS[Phospho (STY)]DFS[Phospho (STY)]DDER_.3	NA	10309.4	25824.6	NA	NA	23038.7	28029.2	31364.7	45906.9	31583.5	29955.2	16820.1	NA	NA	NA	NA	NA	NA	NA	NA	28085.2	14942.4	NA	NA	NA	NA	16285.2	26270.3	NA	18818.8	21740.4	24098	NA	NA	14254.8	NA	NA	NA	55509.3	44154.6	NA	NA	27410.4	48095.6	24048.9	48962.7	57958.9	56839.3	NA
_[Acetyl (Protein N-term)]MHPEPAPPPSRSS[Phospho (STY)]PELPPSGGSTTSGSR_.3	113992	NA	66553.3	45101.8	95118.4	49305.5	75362	57477.5	30422.2	65809.9	73967.8	111331	85782.1	65885.1	NA	38964.7	86165.3	56433.1	72788.4	69125.6	56737	54251.5	34361.4	67049.1	101989	NA	69285.7	56223.7	73036.7	72187.6	54546.8	38174.9	49192.5	68681	NA	NA	13115	41755.1	94612.9	42995.2	28561.1	63988.8	NA	23320.6	62625.7	48931	NA	73778.4	35456.4
_[Acetyl (Protein N-term)]MHRDS[Phospho (STY)]C[Carbamidomethyl (C)]PLDC[Carbamidomethyl (C)]K_.3	18327.5	NA	9674.3	9375.14	24574.5	7223.6	8513.54	7859.85	NA	NA	NA	4302.46	22306.7	15461.3	10674.3	8422.8	22333.7	10620.8	11514.1	7974.8	NA	NA	NA	NA	18486	12307.2	8182.15	6536.84	34636.5	10105.4	13687.7	12983.4	27206	20756.9	12004.5	11786	4375.9	7744.06	9679.92	9981.17	6558.46	8479.13	8200.31	7450.98	NA	4819.84	NA	4628.04	5856.31
_[Acetyl (Protein N-term)]MIAAPEIPTDFNLLQESETHFSS[Phospho (STY)]DTDFEDIEGK_.4	NA	NA	NA	NA	NA	46184.1	NA	NA	NA	35948.3	NA	43226.8	NA	NA	NA	NA	NA	NA	NA	NA	NA	NA	NA	NA	NA	NA	NA	25165.5	NA	NA	NA	NA	NA	NA	37911.9	NA	NA	NA	NA	NA	NA	NA	30023	NA	NA	NA	NA	37723.9	NA
_[Acetyl (Protein N-term)]MIS[Phospho (STY)]PDPRPSPGLAR_.3	NA	NA	NA	NA	NA	NA	NA	NA	NA	NA	NA	NA	37266.9	28282.5	16932.3	13416	52065	18841.4	13010.9	11691.6	19323.2	NA	NA	NA	18152.6	NA	NA	NA	NA	NA	NA	NA	9540.65	NA	NA	NA	NA	NA	NA	NA	NA	13164.9	NA	17129.3	NA	NA	NA	24039.1	NA
_[Acetyl (Protein N-term)]MLPLSIKDDEY[Phospho (STY)]KPPK_.3	NA	NA	NA	NA	NA	NA	NA	NA	NA	NA	NA	NA	14666.9	NA	NA	NA	NA	NA	7301.77	7892.98	NA	NA	6352.25	9291.87	10833.5	NA	NA	NA	NA	NA	NA	NA	NA	NA	NA	NA	NA	NA	NA	NA	NA	NA	NA	NA	NA	NA	5369.85	NA	NA
_[Acetyl (Protein N-term)]MLPSLQES[Phospho (STY)]MDGDEK_.2	50116.5	NA	26490.1	27324.2	26767.5	NA	27023.1	33047	34246.9	30369.1	26317.9	26375.3	47604.2	NA	29502.3	28082.2	28322.8	NA	NA	NA	NA	26826.3	27968.5	26140.1	47937.2	23564.1	35618.6	39437.4	32726.9	NA	25990.3	29031.4	25172.2	NA	24330.7	26778.8	NA	18049	51245.7	28145.5	16632.3	22035.9	17659.1	21100.5	NA	25755.8	38781.1	28975.4	15741.1
_[Acetyl (Protein N-term)]MLQQ[Deamidation (NQ)]DS[Phospho (STY)]NDDTEDVSLFDAEEETTNRPR_.3	91948	7641.75	97040.7	93781.4	76475.7	82513.3	92269.3	96568.3	107618	104894	96367.3	79899.6	113697	126045	134196	117082	83646.2	70745.5	95742.5	83476.4	88886.8	107915	104273	85567.7	91106.6	41394.4	93518.9	95899.4	59028	64645.9	76395.9	62612.7	69707.8	49927.6	67032.7	77617.6	NA	57825.8	95190.1	102994	66339.9	66033.6	62045.8	66134.7	95455.2	80573.4	102336	76489.4	65137.1
_[Acetyl (Protein N-term)]MLQQDS[Phospho (STY)]NDDTEDVSLFDAEEETTNRPR_.3	87060.9	NA	88594.4	91417.2	74348.6	79918.9	88807.9	90301	104605	99743	91523.2	79743.5	103320	122252	128686	115687	79441.2	65547.4	92302.8	82876	86241	104730	98386.9	87158	86104	35562.9	90530.8	94287.6	57468.8	61322.5	71155.2	60857.6	66874.2	44972	64752	73217.8	NA	56770.5	91364.1	101833	63334.3	64003.9	59794.8	66791.2	93227.3	78917.7	101197	71923.9	62031.7
_[Acetyl (Protein N-term)]MLSNSQGQS[Phospho (STY)]PPVPFPAPAPPPQPPTPALPHPPAQPPPPPPQQFPQFHVK_.5	37062.5	NA	68134.5	57661.7	33003.2	20764.7	26673.3	28218.5	15876.3	28384.1	NA	24536.3	65570.7	70526.8	75429.1	77019.6	27611.8	NA	NA	23233.5	26051.3	18291	29001	27845.4	63993.3	32167.6	30463.5	27208.9	NA	NA	16599.2	14525.9	21429.9	40602.8	NA	25764.3	NA	10010.6	NA	20143.3	NA	NA	15954.7	NA	NA	NA	28541.2	18728.6	21465.3
_[Acetyl (Protein N-term)]MLTDSGGGGTS[Phospho (STY)]FEEDLDSVAPR_.3	NA	NA	NA	NA	24896.3	NA	NA	35794.1	NA	NA	NA	NA	36777.7	NA	NA	NA	NA	NA	25686	NA	NA	26593.8	NA	NA	NA	29526.1	NA	16914.2	NA	NA	29509.9	NA	NA	NA	NA	NA	NA	NA	NA	20964.3	NA	NA	15894.9	NA	41248	NA	NA	28745	NA
_[Acetyl (Protein N-term)]MN[Deamidation (NQ)]GHS[Phospho (STY)]DEESVR_.2	40888.5	NA	26376	26935.5	32198.3	23044.9	36514.1	39482.8	25417.8	16148.1	19560.1	NA	32922.9	11303.7	27667.3	18113.6	NA	5885.44	27646.2	35646.4	30530.6	12171.8	22699.4	14959.4	27168.2	11547.9	NA	25197.3	20403.1	NA	19441.5	20840.9	9156.52	NA	13065.9	11467.7	NA	9627.38	22809.2	22611.6	9635.97	NA	22442.3	24356.8	11256.1	17855.9	33000.7	18580.9	9656.53
_[Acetyl (Protein N-term)]MN[Deamidation (NQ)]NTAAS[Phospho (STY)]PMSTATSSSGR_.2	NA	NA	NA	NA	NA	NA	NA	NA	NA	NA	NA	NA	NA	NA	NA	NA	NA	NA	NA	NA	NA	NA	NA	NA	NA	NA	NA	NA	NA	NA	NA	NA	NA	NA	NA	NA	NA	NA	NA	NA	NA	NA	NA	NA	NA	NA	NA	NA	NA
_[Acetyl (Protein N-term)]MN[Deamidation (NQ)]TAPSRPS[Phospho (STY)]PTR_.2	886422	NA	545286	524215	1.02639e+06	514443	600923	706957	611836	470247	561572	569979	1.08068e+06	789258	609297	529781	1.24537e+06	588288	661693	688078	753193	543396	436027	640320	913436	569958	440918	547754	819236	494363	556860	565548	448044	512313	318485	357195	244003	496451	1.08479e+06	788131	467850	589545	763726	797441	650153	605386	792509	658011	609850
_[Acetyl (Protein N-term)]MN[Deamidation (NQ)]TAPSRPS[Phospho (STY)]PTRR_.3	927049	17651.7	480805	445894	1.04542e+06	503034	569460	700347	548260	357831	545964	438585	1112421	780883	591658	479600	1.08574e+06	506476	600134	606105	689247	508558	441156	595067	824749	507779	406347	523410	739120	427848	398354	500727	400006	312027	312405	352362	279224	512954	1.03571e+06	699959	590567	601682	774307	759971	666797	637465	739229	671861	615631
_[Acetyl (Protein N-term)]MNHIVQTFS[Phospho (STY)]PVNSGQ[Deamidation (NQ)]PPNYEMLK_.3	NA	NA	NA	NA	NA	NA	NA	NA	NA	30184.3	35866.4	NA	NA	NA	NA	NA	NA	NA	NA	NA	NA	NA	NA	NA	NA	NA	NA	NA	NA	NA	NA	NA	NA	NA	NA	NA	NA	NA	NA	NA	NA	21444.3	24276.1	NA	43225.3	36345.8	51161.2	45967.4	NA
_[Acetyl (Protein N-term)]MNHIVQTFSPVNSGQPPNY[Phospho (STY)]EMLK_.3	NA	NA	NA	NA	NA	NA	NA	NA	NA	NA	NA	NA	NA	NA	NA	NA	NA	NA	NA	NA	NA	NA	NA	NA	NA	NA	NA	NA	NA	NA	NA	NA	NA	NA	NA	NA	NA	NA	66117.6	25725.1	NA	21885.7	26481.7	39460.2	34384.3	33756.9	NA	31413.2	15776.6
_[Acetyl (Protein N-term)]MNHLPEDMENALTGS[Phospho (STY)]Q[Deamidation (NQ)]SSHASLR_.3	94972	NA	52208	NA	66489.8	NA	60581.4	76156.6	110934	72307.1	77559.2	83162.5	93727.5	NA	70197.8	69719.6	95529.7	68282.1	95353.6	96976.6	73842.1	79053.8	74998.4	74020.5	130194	NA	45598.6	66453.6	73421.9	61574.2	91413.9	87430.9	59885.1	72773.2	65123.1	70134.3	NA	75946.5	88517.5	81263.5	71313.2	NA	71591	83632.1	NA	72417.9	119955	80525.3	112474
_[Acetyl (Protein N-term)]MNHLPEDMENALTGS[Phospho (STY)]QSSHASLR_.3	109096	NA	56807.8	133515	NA	NA	69180.4	65604.6	195275	69770.9	126981	100553	129951	77035.4	66768.2	63217.8	156895	184551	33412.8	70943.7	81554.2	78083.7	NA	105490	NA	82483.7	58048.1	70921.6	NA	65362	NA	122445	74610.8	125318	NA	110649	29312.2	59514.3	94467.1	85423.9	78921.2	NA	118331	NA	76285	115380	48260.9	81439.9	133262
_[Acetyl (Protein N-term)]MNHLPEDMENALTGSQSS[Phospho (STY)]HAS[Phospho (STY)]LR_.3	NA	NA	NA	NA	NA	NA	NA	NA	NA	NA	NA	NA	NA	NA	NA	NA	27458.8	NA	NA	NA	11112.3	NA	NA	NA	NA	22742.8	9638.04	NA	NA	NA	NA	NA	NA	12371	NA	NA	NA	NA	NA	NA	NA	NA	NA	NA	13533.6	12109.5	NA	NA	NA
_[Acetyl (Protein N-term)]MNHLPEDMENALTGSQSSHAS[Phospho (STY)]LR_.3	33495.3	NA	54711.2	74424.7	66061.4	66800.7	64219.6	66985.6	124199	71745.4	43041.2	86825.1	109764	50497.6	70386.2	67838.5	79304.8	71022.9	102583	40969.5	78672.5	78587.7	58239.6	82092.2	88192.4	53354.5	30297.1	66516.7	38982.3	64175.6	84646.1	75656.1	62234.7	47271.7	69754	40340	25971.4	64448.6	92390.6	84429.1	37296.2	93460.2	87785.1	81719.1	73694.6	85971.8	106327	80857.8	113971
_[Acetyl (Protein N-term)]MNLLPNIES[Phospho (STY)]PVTR_.2	NA	NA	NA	NA	34422.5	NA	6247.6	NA	NA	NA	NA	14645.5	NA	44074.6	NA	37576.8	NA	NA	NA	NA	NA	NA	43792.4	NA	34004.5	NA	NA	NA	NA	NA	NA	NA	25932.4	NA	NA	NA	NA	NA	140934	NA	NA	NA	NA	NA	NA	57401.3	11171.5	NA	88629.5
_[Acetyl (Protein N-term)]MNNTAAS[Phospho (STY)]PMSTATSSSGR_.2	50744.2	NA	33617	NA	57071.3	NA	33891.7	38063.6	40581	41363.5	NA	49562.8	62156.7	46458	36475.8	NA	73069.8	51631.2	NA	50405.9	43845.3	39510.2	NA	41639.8	57739	33224.5	34049.5	NA	NA	48664.6	29618.3	NA	38328.8	50336.8	NA	46723.5	NA	39597.4	60956.2	NA	36223.3	NA	NA	51470.4	NA	NA	40682.6	45493	41649.9
_[Acetyl (Protein N-term)]MNPEY[Phospho (STY)]DYLFK_.2	41148	NA	22666.2	21889.6	NA	NA	23433.4	23313.6	27532.5	23603.4	25192.4	16836	71629.2	38060.1	47661.1	34862.2	35096.9	23495.3	27127.1	28786.8	32028.5	30683.2	27893.2	24884.7	35692.5	NA	NA	20608.4	22588.7	18266.2	22361.9	20661.7	15231.7	NA	16869.1	17303.6	NA	10328	NA	14509.6	NA	NA	NA	NA	NA	NA	21634.9	15179.1	16242.5
_[Acetyl (Protein N-term)]MNTAPSRPS[Phospho (STY)]PTR_.2	914629	NA	562610	537554	1.03413e+06	523436	606662	746058	620537	471196	564110	572170	1.10923e+06	796832	639484	535394	1286008	603899	669835	706129	767400	560756	447618	663987	936306	576690	437521	560401	821819	503930	572069	575846	456108	510947	321883	363805	256550	500308	1.12674e+06	814111	487701	620883	793346	815926	675338	627215	806085	668804	637345
_[Acetyl (Protein N-term)]MNTAPSRPS[Phospho (STY)]PTRR_.3	1.02707e+06	23795.3	533642	506810	1.16524e+06	561375	634557	781755	618354	399099	615154	498208	1.2312e+06	863934	655778	533344	1.19649e+06	572512	668898	674444	772228	578391	484681	649294	911591	578271	454319	590837	824218	494799	446560	558333	457896	361490	354881	412659	324780	583244	1.14805e+06	798685	655932	667330	863216	864845	747506	709266	827684	757744	684776
_[Acetyl (Protein N-term)]MNTAPSRPSPT[Phospho (STY)]RR_.2	34326.8	NA	NA	NA	NA	16270.9	NA	NA	NA	NA	NA	NA	42370.2	NA	NA	NA	NA	NA	NA	NA	21764	15499.7	NA	NA	26168.7	13865	NA	NA	NA	NA	NA	NA	NA	NA	NA	NA	4721.92	NA	34492.1	20231.1	NA	16224.2	26070.4	19577.5	NA	18801.8	NA	NA	21940.4
_[Acetyl (Protein N-term)]MQNSEGGADSPASVALRPSAAAPPVPAS[Phospho (STY)]PQR_.3	14164.3	NA	10917.5	NA	16540.5	13932.6	9271.62	NA	NA	13760.2	NA	15143.2	NA	NA	NA	NA	NA	NA	NA	NA	NA	NA	NA	NA	19184.7	20507.5	8625.41	11585.6	11899.7	NA	NA	NA	NA	NA	NA	NA	13376.5	29841.3	31098.7	32487.6	24657.8	29891.7	23078.6	33628.8	22802.5	21342.1	25448.9	31006.8	19465.3
_[Acetyl (Protein N-term)]MQS[Phospho (STY)]PAVLVTSR_.2	NA	NA	NA	NA	NA	NA	NA	NA	NA	NA	31703.2	NA	71220.3	NA	NA	21014	20373.6	NA	NA	NA	NA	NA	NA	NA	NA	NA	NA	29892	NA	NA	NA	NA	27935.5	35000.3	31059.2	43522.2	NA	NA	NA	NA	NA	NA	NA	NA	NA	NA	22103.5	NA	NA
_[Acetyl (Protein N-term)]MS[Phospho (STY)]PTPPLFSLPEAR_.2	NA	NA	16852.3	NA	NA	NA	NA	NA	35463	9351.48	NA	NA	82054.1	NA	12144	NA	43400.8	29846.2	9330.66	NA	35643	17138.3	NA	NA	41541	NA	NA	NA	NA	29143.5	13153.2	16744.2	NA	34398.7	NA	NA	NA	9493.37	25898.4	NA	NA	NA	NA	NA	NA	NA	NA	NA	7234.23
_[Acetyl (Protein N-term)]MTEEVDFLGQDSDGGS[Phospho (STY)]EEVVLTPAELIER_.3	NA	NA	NA	17215.8	23294.8	17155.2	32828.2	13255.7	NA	NA	16218	NA	NA	NA	NA	NA	NA	NA	NA	NA	NA	NA	NA	18844	NA	NA	13125.8	14240.4	NA	NA	NA	NA	NA	NA	NA	NA	NA	NA	NA	NA	NA	NA	NA	NA	19165	43409.6	32882	30454.5	NA
_[Acetyl (Protein N-term)]MWNSGFESYGSSSYGGAGGYTQSPGGFGS[Phospho (STY)]PAPSQAEK_.4	66000.3	NA	60232.6	56083.4	87856.8	83365.8	75481.1	82543.9	80285.2	NA	67923.2	65322.5	72353.6	104044	72343.1	49778.4	79783.6	58139.9	59941.3	59756.2	67795.8	58983	74164.3	55178.1	77883.3	56323.4	47513.1	47394.9	78664.4	57430.1	66255.6	50397.6	66860.7	69528.4	61112	50925.8	5011.17	31617.7	80062.3	57176.8	25405.7	49593.9	57576.9	55293.1	62193.5	71706.3	92088.8	78911.4	33018.6
_[Acetyl (Protein N-term)]MYPESTTGS[Phospho (STY)]PAR_.2	81692.9	NA	89437.5	83954.6	126882	119692	125244	125398	106710	86464.3	107960	90627.8	74568.1	70298.3	71612.4	57910.2	91269.5	85926.2	103742	94009.4	104703	107767	81720.6	101104	88621.3	78762.7	75784.3	82943.3	97075.2	60216.7	66393.4	68847.8	83408.7	58568	43812.9	47843.1	36721.6	82012.4	93278.5	93482.1	97463.2	141954	109655	139293	121220	137224	173009	141341	77735.2
_[Acetyl (Protein N-term)]MYPESTTGSPARLS[Phospho (STY)]LR_.3	NA	NA	NA	13558.7	30116.5	NA	NA	NA	NA	NA	NA	NA	30033.9	22174	13465.3	NA	50153.8	24403	NA	NA	13855.7	NA	NA	NA	29798.2	25910.5	11490.8	14982	29212.9	14932.9	NA	12624.3	18986.7	24547.7	NA	NA	NA	23331.9	32960.8	20837.5	NA	19000.3	NA	18675	18049.2	NA	19583.3	16847.7	13234.1
_[Acetyl (Protein N-term)]MYTAIPQ[Deamidation (NQ)]SGS[Phospho (STY)]PFPGSVQDPGLHVWR_.3	13318.7	NA	NA	NA	7995.92	NA	11738	9708.89	7457.78	NA	6929.33	15541.6	13520.6	9555.7	12466.5	8222.14	14893.7	11465.9	8746.3	NA	NA	14243.6	7736.41	NA	48401.8	5120.37	14038.8	4608.06	16008.4	10177.7	9772.41	32587.2	71007	58243.3	72115.7	44898.2	8008	3422.21	NA	5584.32	9096.51	29847.1	5354.6	9760.2	NA	15741.1	NA	NA	22890.5
_[Acetyl (Protein N-term)]MYTAIPQSGS[Phospho (STY)]PFPGSVQ[Deamidation (NQ)]DPGLHVWR_.3	12549.4	NA	NA	NA	9476.78	NA	NA	8221.55	7703.05	NA	7450.13	13243.5	14159.1	11382.6	NA	12709.2	15423	11731.2	9089.24	NA	NA	20410.2	5849.17	NA	45287.9	NA	NA	4930.72	16176.8	10302.5	9712.99	15689	55704.2	19773.4	19205.9	36516.5	7140.86	3550.43	NA	4915.75	9071	25380.6	6006.82	NA	12187.5	15001.7	NA	NA	8283.95
_[Acetyl (Protein N-term)]PGPTPSGTNVGSSGRS[Phospho (STY)]PSK_.3	179777	27763.9	135511	116633	182149	117410	138147	151805	117450	NA	83560.9	78457.7	88479.5	161020	140038	142697	83272.6	133796	110591	135574	158420	117289	119811	108095	194782	107825	61301.4	105498	144749	130622	64661.7	110635	110106	110095	80315.9	81721	61762.9	126046	233096	190834	129048	174872	142772	162667	144459	139618	163860	141543	166676
_[Acetyl (Protein N-term)]S[Phospho (STY)]AADEVDGLGVAR_.2	24152.6	NA	15936.5	15158.6	26851.3	19090.9	19738.8	22621.5	13340	NA	23898.2	9507.04	31913.2	26249.7	26600.9	20813.4	19387.3	NA	30942.3	21131.4	21303.8	21292.2	23172.7	19525.3	27329	15276.7	NA	21086.1	25460.5	15940.9	19853.9	20420	20764.7	18107.8	25714.9	22392.3	17980.2	18116.7	NA	19324.2	13625.8	25193.5	14830.6	17673.4	20261.9	16328.2	17831.2	NA	13369
_[Acetyl (Protein N-term)]S[Phospho (STY)]AADEVDGLGVARPHYGSVLDNER_.3	218570	NA	146584	147456	171861	128730	151394	171691	155173	149044	149927	159686	214903	320994	233058	185898	282107	151254	245078	167524	166487	213325	134867	182919	177653	154870	127488	148323	183478	152874	131065	159400	125288	136771	140285	133792	21589.3	99110.1	126940	129092	97200.7	149121	132189	132915	123404	130125	141677	123199	96085
_[Acetyl (Protein N-term)]S[Phospho (STY)]AAEAGGVFHR_.2	107428	NA	96291.9	NA	NA	NA	NA	NA	NA	NA	73757.6	NA	140267	97693.9	NA	NA	NA	78359.4	NA	NA	NA	NA	NA	NA	NA	NA	NA	NA	75911.2	63012.2	63899.7	72640.8	89344.8	116778	68491.6	87162.6	NA	NA	NA	NA	NA	NA	NA	NA	NA	31913.3	NA	NA	NA
_[Acetyl (Protein N-term)]S[Phospho (STY)]ADAAAGAPLPR_.2	45314.4	NA	30206	34541.6	66222.7	25817.3	26973.5	29461.5	26491.2	22840.7	24887.3	34400.5	67966.7	50781	33080.4	30711.6	68305	30319.6	34977	30276.4	37770.6	24887.1	16282.4	26740.1	73606.5	43917.4	25251.1	34324.9	67574.1	31160	44109.4	38641	52390.9	45021.7	37551.1	52558	14512.6	42450.4	79218.1	53577.1	21566.1	50052	50490.2	57469.1	25045.4	40937.7	55985.7	55401.7	27207.2
_[Acetyl (Protein N-term)]S[Phospho (STY)]ADGAEADGSTQVTVEEPVQQPSVVDR_.3	55510.8	NA	31576.7	NA	NA	NA	NA	NA	NA	34588.7	NA	NA	NA	54235.2	NA	NA	NA	NA	NA	NA	35703.4	NA	NA	NA	NA	55879.2	36651	NA	44638.3	NA	44013.4	48202.9	69859.1	46629.6	37321.6	NA	43289.4	86835.9	NA	73929	62030.4	NA	78116.2	NA	60185.4	55377.8	NA	NA	88468.8
_[Acetyl (Protein N-term)]S[Phospho (STY)]AELNVPIDPSAPAC[Carbamidomethyl (C)]PEPGHK_.3	21069.2	NA	14241.1	NA	25320	NA	NA	NA	NA	NA	NA	NA	NA	NA	NA	NA	NA	NA	NA	NA	NA	NA	NA	NA	NA	20533.3	NA	12889	NA	NA	NA	NA	NA	NA	NA	NA	13094.4	24329.2	30133	31317.9	25208.8	35361.8	26891.8	32767.4	27721.6	23716.3	26414.1	25652.4	19425.2
_[Acetyl (Protein N-term)]S[Phospho (STY)]AEVETSEGVDESEK_.2	NA	NA	NA	NA	NA	NA	NA	NA	NA	NA	NA	NA	NA	NA	NA	NA	NA	NA	62173.9	NA	NA	NA	47835.8	NA	NA	NA	NA	NA	NA	NA	NA	NA	NA	NA	NA	52907.1	NA	NA	NA	NA	NA	NA	NA	NA	NA	NA	NA	NA	NA
_[Acetyl (Protein N-term)]S[Phospho (STY)]AEVETSEGVDESEKK_.2	NA	NA	NA	NA	NA	NA	NA	NA	NA	NA	13649.6	NA	NA	NA	NA	NA	NA	NA	26425.5	NA	NA	NA	NA	NA	23804.7	NA	NA	NA	22010.3	NA	12903.9	NA	19128	23043	20111.1	NA	NA	NA	NA	5770.36	NA	NA	NA	NA	8226.66	NA	NA	NA	5596.63
_[Acetyl (Protein N-term)]S[Phospho (STY)]AEVPEAASAEEQ[Deamidation (NQ)]K_.2	41680	NA	40765.9	28567.4	28934.5	29520.3	36151.8	35671.2	29528.6	NA	NA	43338.2	49365.9	48545.8	35060.3	28567.7	34130.8	33676.3	54017.5	36002.7	35713	46634.3	22259.5	34209.2	58289.4	35887.3	31493	38069	46347.3	49686.1	41923.4	48473.2	66495.7	40691.9	61344.5	78650.5	NA	43224.7	69594.9	48093	24841.6	47230.2	32965.5	41646.9	30271.2	42028.2	53142.9	49071.4	50147.1
_[Acetyl (Protein N-term)]S[Phospho (STY)]AEVPEAASAEEQK_.2	90868	NA	91714.5	70329.8	62058.9	NA	NA	88151.7	76041.9	NA	71310.6	96179.9	104206	125072	81171.8	NA	76890.5	68442.1	119784	79643.3	85245.7	108415	60511.4	85022.6	118322	79480.5	80355.1	91082.2	98413.5	94119.1	86515.6	102719	143060	135934	146437	165744	39615.8	91505	123301	100047	59646.4	110251	76109.8	81863.8	67148.5	90315.5	109071	104476	101721
_[Acetyl (Protein N-term)]S[Phospho (STY)]AHLQWMVVR_.2	5539.19	NA	6191.7	4672.81	13147.4	NA	7154.42	6478.41	4344.39	5411.66	6661.05	6873.06	10998	8086.37	7208.24	5212.42	21882	9876.21	8391.63	10310.6	6108.25	8122.8	9357.67	6183.67	13660.9	6933.78	6106.86	5417.06	20451.1	11812.4	11495	9933.72	35012.8	40713.2	22698.7	29236.9	NA	NA	NA	NA	NA	NA	NA	NA	NA	NA	4205.23	3172.43	NA
_[Acetyl (Protein N-term)]S[Phospho (STY)]AIQNLHSFDPFADASK_.2	NA	NA	138460	NA	88548.5	139530	60780.4	176816	67565.9	NA	56671.5	59425.7	NA	107088	NA	NA	100594	NA	120592	NA	NA	49472.4	NA	NA	NA	NA	NA	70655.1	68413.4	NA	61202.7	61598.7	56721.3	54514.9	42449.1	51873.2	4066.69	17161.3	159021	85876.1	NA	29901.9	NA	NA	48741.4	NA	98222.6	84346.2	29196.2
_[Acetyl (Protein N-term)]S[Phospho (STY)]ANEDQEMELEALR_.2	NA	NA	NA	NA	NA	NA	NA	NA	NA	NA	NA	NA	NA	NA	NA	NA	NA	NA	NA	NA	NA	NA	NA	NA	NA	NA	NA	NA	NA	NA	NA	NA	105562	113112	96271.7	89430.3	NA	NA	NA	NA	NA	NA	NA	NA	NA	NA	NA	NA	NA
_[Acetyl (Protein N-term)]S[Phospho (STY)]APFEER_.2	32178.7	NA	19121.6	14887.7	25028	11966.8	23593.3	20636.7	17140.1	14963.8	19926.6	31826.1	22378.9	29266.4	18924.5	10519.3	30621.7	20340.7	34239.4	21100.8	18456.1	31160.7	9851.82	21980.1	30233.7	18880.1	17275	16941.1	45814.1	31378.2	27933.1	30516.6	62137.2	61514.9	43898.8	59201.3	6428.92	9383.23	NA	NA	NA	15825	NA	NA	NA	NA	15226.8	15525.5	12803
_[Acetyl (Protein N-term)]S[Phospho (STY)]APSEEEEYAR_.2	NA	NA	NA	NA	NA	NA	NA	NA	NA	NA	NA	NA	NA	NA	NA	NA	NA	NA	30105.3	NA	NA	NA	NA	NA	NA	NA	NA	NA	NA	NA	NA	NA	25483.3	NA	NA	34257.2	NA	NA	NA	NA	NA	NA	NA	NA	NA	NA	NA	NA	NA
_[Acetyl (Protein N-term)]S[Phospho (STY)]ASSLLEQ[Deamidation (NQ)]RPK_.2	NA	NA	NA	NA	53948.9	38897.5	48677	51347.7	38489.3	31638.2	30838.6	NA	NA	NA	NA	NA	NA	NA	NA	36058.9	50583.3	NA	19521.3	29429.8	NA	30894.9	NA	NA	NA	NA	NA	NA	NA	NA	NA	NA	NA	NA	NA	NA	NA	NA	NA	37493.4	NA	30145	47560.4	53475.7	NA
_[Acetyl (Protein N-term)]S[Phospho (STY)]ASSLLEQRPK_.2	28562.8	NA	35389.4	36108.1	92242.2	72760	84327.4	91309.6	67948.5	55737.4	55568.4	47542.7	NA	48675	NA	21778.7	89557.6	47193.3	43341.5	59505.3	86442.7	50828.4	35940.4	55239.4	39448.7	49504.1	36374.1	32551.9	47659.9	36489	28942.7	31580.9	36349.2	36974.1	21322.5	30931	NA	22798.1	40567.8	NA	39405.1	51569.5	47950.1	66827.3	53405.1	55468.4	84860.9	96803.1	NA
_[Acetyl (Protein N-term)]S[Phospho (STY)]AVGAATPYLHHPGDSHSGR_.3	NA	NA	NA	NA	NA	NA	NA	NA	NA	NA	NA	NA	NA	NA	25414.9	NA	NA	NA	NA	32747.9	NA	NA	NA	NA	NA	NA	NA	NA	NA	NA	NA	27233.1	50444.7	55219.5	41799.1	48229.4	NA	NA	NA	NA	NA	NA	NA	NA	NA	NA	NA	NA	12069.4
_[Acetyl (Protein N-term)]S[Phospho (STY)]DAAVDTSSEITTK_.2	13225827	364252	10546654	10343424	12130166	10279638	11782563	11574797	10226223	9038806	9638219	8906402	10471263	9090035	7786928	8283059	8233334	6.41064e+06	9112973	8336761	9261113	8.27936e+06	8024717	8600886	14466635	14374898	9171632	11756592	9936727	9520476	9798713	10032354	8.11944e+06	8338183	6506400	6183891	6.06621e+06	10506192	18725294	14271456	9655560	13005184	14051121	12840065	14738766	14325822	17888038	14332366	10560182
_[Acetyl (Protein N-term)]S[Phospho (STY)]DAAVDTSSEITTKDLK_.2	64813.8	NA	48225.8	55904.7	67783.7	66821.6	72974	64398.8	42915.6	64318	73139	58682.7	49229.1	43724.7	31855.8	38769.1	47960.8	48788.4	53337.7	47976.4	43024.8	43932.7	52028.3	38085.8	72686.9	45667.8	36522.3	59237.6	61550.1	57580.8	51664.5	42492	46341.7	53533	35673.3	NA	21936.2	35132	78347.2	76026.8	35277.4	57716	58879	61789.1	67013	69526.3	86647	75159.8	50665.1
_[Acetyl (Protein N-term)]S[Phospho (STY)]DEFSLADALPEHS[Phospho (STY)]PAK_.2	NA	NA	7622.9	NA	13167.1	19566.5	22022.5	17626	11455	11226.6	13125.5	9848.52	NA	6257.98	NA	NA	NA	NA	9968.43	NA	15431.1	12773.9	15686.8	9546.83	NA	11637.3	7621.24	15539.9	NA	NA	NA	NA	NA	NA	NA	NA	NA	NA	NA	8757.15	NA	8368.45	10491	11188	18683.4	NA	21596.1	12045.4	NA
_[Acetyl (Protein N-term)]S[Phospho (STY)]DEFSLADALPEHSPAK_.2	NA	NA	98707.3	83972.6	128159	93885.6	97768.2	93126.8	92737.9	82918.4	100448	150154	158561	174820	141857	104042	130882	130479	85019	105027	85274.7	79378.7	102674	92415	137824	176809	87601.2	126163	144393	136542	116687	113714	92106.1	196182	85561.8	99589.9	43001.2	45723.5	150836	92803.1	95238	76494.7	80368.9	84865.4	93639.7	75547.8	104929	86609	75317
_[Acetyl (Protein N-term)]S[Phospho (STY)]DEREVAEAATGEDASSPPPK_.3	96605.1	NA	81726.8	67563.1	82742.4	66579.9	67747.4	83393.5	72134.8	58021.2	66925.5	74713.9	66897.7	74664.5	59247.2	NA	76906.1	NA	70750.3	30905.1	56792.9	NA	NA	NA	117275	95794.8	69361.2	81084.9	108475	91273.3	77107.9	83025.6	116091	151215	72630.1	98705.9	10031.3	48224.4	83000.2	78492.7	30520.3	45812.2	49569	87130.7	49221.3	54113.6	73297.2	99566.8	55968.5
_[Acetyl (Protein N-term)]S[Phospho (STY)]DFDEFER_.2	6.4569e+06	98011.9	5140670	4.7948e+06	5020546	5.05075e+06	5251604	5.5667e+06	6220824	4798392	4973687	4.6348e+06	6140188	6.98423e+06	5.34051e+06	3.98385e+06	4.97065e+06	4.60097e+06	4.92161e+06	4.51338e+06	5.66702e+06	5132335	4311599	4.31242e+06	6560932	6.11213e+06	5.14947e+06	5.78491e+06	5279121	5.55171e+06	5349312	4633678	3.99974e+06	4255937	3.35138e+06	2847346	762804	5203354	8216638	8378294	5.49526e+06	6413408	6.27817e+06	7128237	7089741	6.83718e+06	10043630	7539691	6252523
_[Acetyl (Protein N-term)]S[Phospho (STY)]DFDSNPFADPDLNNPFK_.2	NA	NA	NA	76474.5	77578.2	77620.9	61515	NA	NA	NA	59493.5	73734.9	NA	66195.1	NA	48908.6	NA	NA	36103.9	64023	NA	NA	48660.9	75377.4	NA	NA	63798.2	NA	NA	NA	NA	NA	68358.1	NA	NA	62488.5	NA	NA	NA	NA	NA	64244.5	68241.9	NA	NA	70291.6	71851	46107.6	31038
_[Acetyl (Protein N-term)]S[Phospho (STY)]DGDYDYLIK_.2	NA	NA	NA	NA	NA	NA	NA	NA	NA	NA	NA	NA	NA	NA	NA	NA	NA	NA	NA	NA	NA	NA	NA	NA	NA	NA	NA	NA	NA	NA	NA	NA	NA	NA	NA	NA	NA	NA	NA	9297.57	NA	9644.64	8172.82	10007.7	NA	8093.17	13954.6	9539.32	NA
_[Acetyl (Protein N-term)]S[Phospho (STY)]DHGDVSLPPEDR_.2	NA	NA	NA	NA	NA	NA	NA	NA	NA	NA	NA	NA	NA	NA	NA	NA	NA	NA	NA	NA	NA	NA	NA	NA	NA	NA	NA	NA	NA	67663.2	NA	NA	157241	233691	119527	153018	NA	NA	NA	NA	NA	NA	NA	NA	NA	NA	NA	NA	NA
_[Acetyl (Protein N-term)]S[Phospho (STY)]DKPDM[Oxidation (M)]AEIEK_.2	65249	NA	58297.5	57922.6	62899.9	63846.4	68655	65081.2	33677.1	23729.3	68200.7	46048.3	41989.5	47105	39729.8	22451.9	41659.9	36294.9	52560.2	39933.5	NA	30827.2	25625.1	42746.4	60864	85157	50758	74114.1	64465.8	57079	59545.2	62765.3	45016.7	44986.6	42129.4	41380.3	59234	39456.8	48707	56371.2	46236.5	44502.5	40356.8	49298.2	51427.3	38148.2	55657.4	36236.8	42609.1
_[Acetyl (Protein N-term)]S[Phospho (STY)]DKPDMAEIEK_.2	3.7745e+06	97554.9	3978900	3.33568e+06	4.17498e+06	3.3015e+06	4.55871e+06	4181272	2705144	2.23434e+06	3.49605e+06	3.05289e+06	2.56293e+06	2.51112e+06	1.82159e+06	1.46614e+06	2804377	2.00891e+06	2581613	2.26981e+06	2.58264e+06	2.20358e+06	1.60741e+06	1.92459e+06	4.78337e+06	4494292	3.43596e+06	3.73196e+06	4073316	4.06349e+06	4.08066e+06	3.80807e+06	2.45991e+06	2.84737e+06	2.1048e+06	2.11889e+06	1.18081e+06	2.48801e+06	4.26362e+06	3224767	1.9637e+06	2.73869e+06	2886577	3.13413e+06	2739055	2.59137e+06	3.24165e+06	3.23364e+06	2.13915e+06
_[Acetyl (Protein N-term)]S[Phospho (STY)]DLEDDETPQLSAHALAALQ[Deamidation (NQ)]EFYAEQK_.3	34636	NA	NA	35753.3	20138.2	39666.5	NA	40631.7	358422	NA	NA	21427.7	NA	91084.5	31042.3	87248.6	NA	30151.3	NA	NA	42600.8	NA	300079	20297.6	150549	NA	79016.2	40440.4	NA	NA	34329.8	42264.4	79898.5	NA	NA	10669	NA	NA	NA	NA	23047.5	169904	41397.9	NA	25784.8	83961.4	NA	NA	24406.9
_[Acetyl (Protein N-term)]S[Phospho (STY)]DLEDDETPQLSAHALAALQEFYAEQK_.3	40870.6	NA	51125.2	50747.4	34999.7	39847.9	NA	49669	405811	NA	45899.4	29207.2	45878.7	114278	41341.6	111284	65263.6	38670.6	45814	24249	48224.1	NA	358086	34526.7	186372	NA	105130	52200.1	32339.9	43426.6	41247.6	47530.4	101487	NA	NA	NA	NA	17845.4	NA	NA	32809.4	222189	52568.6	NA	36094.9	100946	NA	30003.3	33372.1
_[Acetyl (Protein N-term)]S[Phospho (STY)]DLQAAEGPGSWSPTAR_.2	NA	NA	NA	NA	NA	37126.7	NA	NA	NA	NA	NA	NA	53242.5	NA	NA	NA	NA	NA	NA	NA	NA	NA	NA	NA	NA	NA	NA	NA	NA	NA	65458.9	NA	56344.6	NA	164292	NA	NA	NA	NA	NA	NA	NA	NA	NA	NA	NA	NA	NA	NA
_[Acetyl (Protein N-term)]S[Phospho (STY)]DN[Deamidation (NQ)]DDIEVES[Phospho (STY)]DEEQPR_.2	259939	101128	366327	314432	315872	325393	380333	427090	524133	350820	352590	285306	238870	258890	265012	271238	NA	215953	249298	265425	450926	320101	287519	250234	331940	86099.6	302835	335818	141124	196623	275072	232224	158453	NA	134416	NA	NA	NA	757880	556236	296426	147449	343891	588230	496588	675127	762048	619206	98845.5
_[Acetyl (Protein N-term)]S[Phospho (STY)]DN[Deamidation (NQ)]DDIEVESDEEQPR_.2	70368.7	NA	NA	NA	NA	52348.8	63262.2	67426.5	NA	NA	NA	NA	NA	66742.5	48319.6	NA	62947.7	48055.4	76025.3	NA	NA	86553.5	NA	60687.5	71582.9	NA	57822.9	NA	55604.4	71193.2	44977.5	51187.9	NA	45153.1	NA	NA	NA	36103.3	115747	84856.7	50360.9	69496.8	74193.7	100521	79959.7	NA	89680.2	83866	53048.5
_[Acetyl (Protein N-term)]S[Phospho (STY)]DN[Deamidation (NQ)]GELEDKPPAPPVR_.2	795803	NA	777560	684234	1.02516e+06	716794	788063	902620	731828	612777	739334	772983	1126720	842409	678059	560082	248921	782658	860920	824291	1.06304e+06	722200	629964	154597	1.1669e+06	819966	649102	729019	979917	162704	871658	865298	1.0372e+06	985254	760820	874214	240517	749573	1.44471e+06	1.14673e+06	774584	996448	221243	1.29426e+06	974249	1.02013e+06	1.37734e+06	1.25067e+06	790568
_[Acetyl (Protein N-term)]S[Phospho (STY)]DNDDIEVES[Phospho (STY)]DEEQ[Deamidation (NQ)]PR_.2	379631	134861	537904	464636	442395	490314	495948	629493	762108	510177	494567	398624	319526	346800	373202	372165	213600	300079	342053	381449	670257	456479	387756	350391	471650	120548	426824	505214	172846	274227	376654	321760	225882	98458.7	189092	185399	NA	NA	1.19255e+06	861093	443550	209747	529790	922318	771582	1.02945e+06	1.23079e+06	233318	138693
_[Acetyl (Protein N-term)]S[Phospho (STY)]DNDDIEVES[Phospho (STY)]DEEQPR_.2	285572	120288	403487	365872	350969	384016	395948	505311	573600	393846	407800	329040	266761	288653	293401	311851	202796	242172	284922	313807	501888	352138	324523	291499	366044	108929	341592	385268	163631	225902	311239	265505	185633	100829	162958	156176	NA	28636.5	847274	620466	337227	172095	390440	700051	546989	757787	849998	676469	131083
_[Acetyl (Protein N-term)]S[Phospho (STY)]DNDDIEVESDEEQ[Deamidation (NQ)]PR_.2	73487.3	NA	59999	NA	NA	NA	70919.9	NA	NA	NA	NA	NA	NA	NA	69823.1	NA	83538.4	54638.2	85766.4	NA	NA	89461.8	NA	NA	NA	NA	NA	NA	56496.3	NA	57838.8	NA	NA	52803.5	NA	NA	NA	41764.7	126811	83590.1	49716.1	71918	74096.9	104206	77893.6	79218.9	90891.7	85787.3	57890.7
_[Acetyl (Protein N-term)]S[Phospho (STY)]DNDDIEVESDEEQPR_.2	88267.8	NA	56822.3	NA	69096.6	59882.6	76176.5	76850.7	83993.9	103857	NA	72310.7	NA	88498.5	61510.9	94372.9	82319.2	61607.5	103096	69629.1	83552	117592	NA	72916.5	70081.2	42132.6	61394.2	61046.7	66777.7	95348.4	58032.1	59858.5	51916.3	65843.6	NA	56747.8	NA	51522.1	155882	113691	67342	95000.4	102404	136495	107297	92066.8	116450	98310.3	74334.7
_[Acetyl (Protein N-term)]S[Phospho (STY)]DNGELEDKPPAPPVR_.2	949880	16210.9	851803	689916	969022	718626	777720	838178	775971	602306	784347	805286	1.21798e+06	1.10545e+06	724191	595271	1.40629e+06	855865	961107	873070	1.18773e+06	934237	617412	927451	1.16465e+06	1177771	742655	798666	1.01994e+06	850245	874618	879944	1.01574e+06	1.22452e+06	673085	883536	370346	876842	1.58447e+06	1.18689e+06	922287	1207073	1.11208e+06	1.36888e+06	1.32135e+06	1.14876e+06	1543785	1.28741e+06	795328
_[Acetyl (Protein N-term)]S[Phospho (STY)]DQ[Deamidation (NQ)]EAKPSTEDLGDKK_.2	54788.6	30966.8	40345.8	654782	46285.8	33881.9	675360	924592	866990	737881	56463.7	38055.1	989820	897084	40128.7	672606	46947	26750.8	601074	641981	850026	714885	693816	39510.5	1.10266e+06	48365.1	34350.9	708091	44270.9	47196.1	40687.1	693014	604388	47068.1	29480.9	528207	11928.8	20854.1	95351.8	1184762	33831.1	745537	68884.4	49440.3	56715.5	1.16789e+06	75560.8	67303.2	40487.5
_[Acetyl (Protein N-term)]S[Phospho (STY)]DQ[Deamidation (NQ)]QLDC[Carbamidomethyl (C)]ALDLMR_.2	NA	NA	NA	NA	NA	NA	NA	NA	NA	NA	NA	NA	NA	NA	NA	NA	NA	NA	NA	NA	NA	NA	NA	NA	NA	NA	NA	NA	NA	NA	NA	NA	NA	NA	NA	NA	NA	NA	NA	NA	NA	NA	NA	NA	NA	NA	58699	NA	NA
_[Acetyl (Protein N-term)]S[Phospho (STY)]DQDHSMDEMTAVVK_.2	62714.4	NA	55329.3	48381.1	45075.7	44631.4	52813.9	55465.4	56653.9	44639.6	46074.2	47577.8	49677.3	60145.5	45461.5	37550.9	41740.8	NA	40752.7	39124.5	50752.1	44754.6	36083.6	37329.4	71940.4	71588.3	53063.4	62012.8	48865.9	49079.3	54837.9	45534	38919.1	40366	32351.3	34630.6	16023.1	56188.5	103401	82112.1	40325.7	62965.2	62838.2	73940.6	72568.2	65317.3	88900.6	71429.7	42033.2
_[Acetyl (Protein N-term)]S[Phospho (STY)]DQEAKPSTEDLGDK_.2	1.24189e+06	40022.6	830414	774084	984649	752890	821495	919325	879070	813225	964903	623101	1.15868e+06	1.03695e+06	745352	658037	863958	559641	846313	683490	954176	660862	601156	696828	1.17357e+06	1.15976e+06	668232	806763	993914	781945	900883	923233	876345	823290	658075	714945	531933	959148	1.43854e+06	1.50807e+06	865647	1.05884e+06	877683	1046764	1.03221e+06	1.008e+06	1.50478e+06	1193104	919406
_[Acetyl (Protein N-term)]S[Phospho (STY)]DQEAKPSTEDLGDKK_.3	2.87134e+06	227339	2.19148e+06	2.0218e+06	2524732	2.19332e+06	2.21633e+06	2.43071e+06	2.75928e+06	2.43093e+06	2.84249e+06	2.06958e+06	2796281	2596157	2.37318e+06	1.74118e+06	2.93695e+06	1.75947e+06	1.7609e+06	2.03176e+06	3072563	2.50775e+06	1.78027e+06	2.17269e+06	2.30923e+06	3.90018e+06	2.07105e+06	2.17339e+06	2.57642e+06	2.71603e+06	2.36586e+06	1.93752e+06	2.03469e+06	2834703	1.74824e+06	1.63397e+06	1.32678e+06	2549353	4.9589e+06	4.05441e+06	2.67935e+06	3.07078e+06	2281725	3325053	4.71631e+06	3493263	4991642	4318072	2.75469e+06
_[Acetyl (Protein N-term)]S[Phospho (STY)]DQQLDC[Carbamidomethyl (C)]ALDLMR_.2	64398.6	NA	42033.9	NA	64413.5	NA	NA	NA	NA	NA	55631.5	NA	NA	86685.1	50132.1	NA	NA	NA	NA	NA	NA	32978.4	NA	NA	NA	25551.8	27384.8	30808	46106.6	NA	23971.7	NA	60872.2	NA	22797.5	46166.2	15081.4	21775.5	NA	NA	NA	45996.3	48293.9	NA	NA	48201.4	58354.7	44929.9	35574.2
_[Acetyl (Protein N-term)]S[Phospho (STY)]DS[Phospho (STY)]DLGEDEGLLSLAGK_.2	NA	NA	13805.8	NA	NA	NA	NA	16514	NA	21179	NA	NA	NA	NA	NA	18431.9	NA	NA	NA	NA	NA	NA	16294.3	NA	NA	NA	NA	NA	NA	NA	NA	NA	NA	NA	NA	NA	NA	NA	NA	NA	NA	NA	NA	NA	NA	NA	20296.4	17995.2	NA
_[Acetyl (Protein N-term)]S[Phospho (STY)]DSGEQNYGER_.2	412931	26668.4	393835	357892	369027	518872	403400	425967	390227	142609	339159	337287	364447	439162	355142	182948	527086	431229	535408	463896	421907	365562	182437	394063	428868	488145	342161	329035	395835	430535	396890	445227	626921	564207	500683	466611	226690	405968	438603	486371	401424	476786	372554	442850	467687	427451	442172	398562	402115
_[Acetyl (Protein N-term)]S[Phospho (STY)]DSGEQNYGERES[Phospho (STY)]R_.2	115364	50794.9	121441	94174.7	77774.9	119889	155989	149841	180029	126759	151675	56797.8	99141	67881.1	110526	87712.1	36041.7	46844.6	152709	128039	196696	72955.5	124746	88288.8	99550.8	56874.1	48074.9	119152	42572.2	65725.1	97830.4	87152.4	45244.9	45829.3	75371.9	67834.2	NA	25426.6	253534	146921	59180	86252.5	92097.2	141189	75997.7	184649	464705	199273	72348.8
_[Acetyl (Protein N-term)]S[Phospho (STY)]DSGEQNYGERES[Phospho (STY)]RS[Phospho (STY)]ASR_.3	21996.6	7858.36	17916.3	13173.1	12908.8	18240.4	18218.7	25947.1	29476.6	16459.3	26539.9	16332.3	17880.1	19498.1	16908.8	12758.3	17950.3	19128	20248.5	17452.1	24918.5	26400.6	15979.4	23920	16428.6	12654.9	16023	13510.2	6468.27	15478.9	10713.3	9760.52	6363.69	7839.82	NA	5904.48	NA	NA	32557.8	24158.9	6981.25	9924.08	14131.3	18798.3	31510.2	31753.3	41909	32591.5	7803.85
_[Acetyl (Protein N-term)]S[Phospho (STY)]DSGSQLGSMGSLTMK_.2	NA	NA	9975.66	NA	NA	NA	NA	NA	NA	NA	NA	NA	31042.7	NA	NA	17090.4	NA	NA	NA	NA	NA	NA	NA	NA	NA	NA	NA	NA	NA	NA	NA	NA	NA	NA	NA	NA	NA	NA	NA	NA	9358.8	NA	NA	NA	14641.4	NA	12969.7	NA	NA
_[Acetyl (Protein N-term)]S[Phospho (STY)]DSLVVC[Carbamidomethyl (C)]EVDPELTEK_.2	152776	NA	82028.3	110406	167360	48426.4	103662	113078	86521.2	67261.8	103068	83776.3	109764	109425	89324.6	77657.4	136640	89477.1	78085.5	83826.9	118816	88587.5	109173	64446.1	137089	141910	104449	100431	244393	155493	147684	140298	483580	493808	289162	302165	NA	29800	90768.7	69577	65638.1	64772.2	63587.1	69087.8	58925	43861.9	68299.1	NA	64547.3
_[Acetyl (Protein N-term)]S[Phospho (STY)]DVEEN[Deamidation (NQ)]NFEGR_.2	177946	NA	148294	29203.8	184685	167367	168584	182188	140016	90598.4	137933	150214	166540	185414	150123	128120	219568	176225	217902	22594.3	144519	140468	98747.5	132570	224651	187078	136797	177908	47186.7	42815.9	249578	49787.9	479683	652362	67264.4	73851	69175.4	160598	205689	154326	143772	159513	133084	147774	21414.4	143492	NA	147986	113411
_[Acetyl (Protein N-term)]S[Phospho (STY)]DVEEN[Deamidation (NQ)]NFEGRES[Phospho (STY)]R_.2	21359	NA	6741.35	21835.7	NA	NA	NA	28816.4	7086.33	6033.27	21448.4	NA	19299.8	17588.4	19965.2	NA	NA	12265.1	33380.8	NA	26388.7	NA	22155.3	13888.9	NA	NA	NA	27046.2	NA	21160.6	8982.75	NA	26254.5	32228.4	NA	4992.3	NA	NA	NA	28769.7	NA	18096.5	NA	25183.2	NA	23351.5	12421.5	NA	NA
_[Acetyl (Protein N-term)]S[Phospho (STY)]DVEENNFEGR_.2	300312	13730.6	249274	259930	292322	286263	276733	312912	236750	160427	236118	261373	278985	311703	258302	213247	358992	300944	354251	278850	232296	231607	169442	208988	370132	310416	225809	296448	412003	456444	413082	409936	777739	1051761	737164	892486	113153	260139	335980	258703	228791	258849	228708	251501	253980	230338	263187	245436	189006
_[Acetyl (Protein N-term)]S[Phospho (STY)]DVEENNFEGRES[Phospho (STY)]R_.2	27159	5125.35	30584.7	25786.7	26953	31348.4	33074.6	34360.7	30423.5	26876.5	29866.9	19585.9	26109.1	22347.6	26181.8	25811.9	19761.2	19018.8	43744.4	26100	34778.3	17370	29115.1	17658.7	33252.4	20208.4	14952.9	36994.7	27219.4	29382.4	49793.5	41557.1	34186.4	45556.3	40636.6	46512.6	NA	8317.07	49432.2	34464.5	14538.8	20446.5	23932.5	31594.7	17390.5	33804	74117.8	32679.9	17109.6
_[Acetyl (Protein N-term)]S[Phospho (STY)]DVEENNFEGRES[Phospho (STY)]RS[Phospho (STY)]QS[Phospho (STY)]K_.3	NA	NA	NA	NA	NA	NA	NA	NA	NA	NA	NA	NA	NA	NA	NA	NA	NA	NA	NA	NA	NA	NA	NA	NA	48711.1	NA	NA	NA	NA	NA	NA	NA	NA	NA	NA	NA	NA	NA	NA	NA	NA	NA	NA	NA	NA	NA	NA	NA	NA
_[Acetyl (Protein N-term)]S[Phospho (STY)]DYENDDEC[Carbamidomethyl (C)]WSVLEGFR_.2	54081	NA	26883.5	NA	NA	NA	NA	NA	54307.3	35943.9	NA	NA	NA	NA	NA	NA	47812.5	45327.9	NA	NA	62744.4	NA	NA	NA	135857	60490.6	NA	NA	32759.6	69613.6	NA	NA	NA	74474.8	NA	NA	NA	45113.5	179158	92153.5	105586	NA	43871	250720	110655	44457.5	44297.1	48278.5	28494.9
_[Acetyl (Protein N-term)]S[Phospho (STY)]DYSTGGPPPGPPPPAGGGGGAGGAGGGPPPGPPGAGDR_.3	98460.9	17202.5	112800	90528	94808.6	98133.2	106938	115206	128009	101536	125783	109017	100773	102438	99316.5	74269.6	100401	75368	91771.8	97238.5	123711	103299	84430	98398.8	110074	127875	93991.7	98568.6	94719.7	100433	116204	105908	76018	97669.3	72940.7	79016.9	35717.1	80965.8	148188	110697	78328	103897	91430.2	111165	109112	110549	145266	136975	89496.3
_[Acetyl (Protein N-term)]S[Phospho (STY)]EAGEATTTTTTTLPQAPTEAAAAAPQDPAPK_.3	97743.6	NA	89559.3	97151.6	121409	115115	113165	125416	100876	93721.1	118268	87218.5	64278.6	70864	55498.9	55850.9	79998.1	67814.6	85392.1	95773.4	86311	67716	85057.8	75359.2	120934	147799	90289.9	122304	95592.4	81012	96459	95650.2	92372.8	105359	92751.6	78481.8	59691.7	98167	85617	105023	126732	161228	153026	134931	116490	123971	146512	137008	86722.3
_[Acetyl (Protein N-term)]S[Phospho (STY)]EDSSALPWSINR_.2	NA	NA	15221.1	18700.3	NA	14686.6	14367.7	NA	12539.8	NA	14265.9	NA	27529.2	25289.9	26875.7	19682.4	NA	NA	28819.7	NA	19164.9	NA	25283.5	21931.3	17968.3	16093.7	17484.4	17911.7	20156.6	16471	20553.1	16382.4	23569.9	18789.9	26027.7	31924.6	NA	NA	NA	NA	NA	NA	NA	NA	NA	NA	NA	NA	23666.1
_[Acetyl (Protein N-term)]S[Phospho (STY)]EEIITPVYC[Carbamidomethyl (C)]TGVSAQVQK_.2	NA	NA	NA	NA	NA	NA	NA	NA	NA	NA	NA	NA	40052.5	NA	NA	NA	NA	NA	NA	NA	NA	NA	NA	NA	NA	NA	NA	NA	NA	NA	NA	NA	37774.4	35202.5	NA	NA	9945.81	NA	NA	NA	NA	27705.9	NA	NA	NA	NA	NA	NA	24099.6
_[Acetyl (Protein N-term)]S[Phospho (STY)]EGESQTVLS[Phospho (STY)]SGSDPK_.2	46014.7	22910.4	48005.1	40904.9	39500.6	46309.3	50822.8	59254.6	50866.5	57070.3	46724.3	42514.5	68357	73614.7	61524.5	48258.9	48592.6	48495.2	61268	57471.8	65101.3	57864.1	49410.5	55641	49898.1	47919	38733.6	39412.7	35621.1	42297	40692.6	37344	25909	NA	NA	30494.2	NA	NA	NA	18176.4	NA	17030.4	NA	NA	NA	NA	NA	NA	23540.4
_[Acetyl (Protein N-term)]S[Phospho (STY)]EGESQTVLSSGS[Phospho (STY)]DPK_.2	59090.9	24791.4	66151.4	50514.5	56826.7	66868.1	76105.5	76041.6	61990.3	74685.4	51823.3	69802.9	77077.8	83325.3	73742	69745.3	77069.7	66126.9	69818.7	67396.7	72588.9	66624.3	59226.3	66513.5	63541.1	65116.3	52658	50881.8	51538.5	64391.2	59656.2	50447.3	40173.5	48598.9	NA	44272.8	NA	NA	NA	31101.9	NA	39924.6	NA	NA	NA	NA	NA	NA	33302.1
_[Acetyl (Protein N-term)]S[Phospho (STY)]EGESQTVLSSGSDPK_.2	827057	38741.2	742934	672797	793103	669230	708222	716343	703167	500546	683834	719533	874088	989608	802756	576579	935268	755069	801742	684853	780376	691808	463541	622874	889044	1.01771e+06	721177	657723	798728	826222	851047	776912	569103	722480	556290	548035	352014	643803	954406	720522	581026	794872	566586	748890	721886	722357	703046	564892	622682
_[Acetyl (Protein N-term)]S[Phospho (STY)]ELDQLRQEAEQLK_.2	NA	NA	NA	NA	NA	NA	NA	NA	NA	NA	NA	NA	NA	NA	NA	NA	NA	NA	11218.1	NA	NA	NA	NA	NA	NA	NA	NA	NA	NA	NA	NA	NA	11852.6	10879.8	11508.7	NA	NA	NA	31369.7	12189.9	NA	NA	NA	11284.3	11810	NA	NA	NA	12919.2
_[Acetyl (Protein N-term)]S[Phospho (STY)]ELEQLRQEAEQLR_.3	NA	NA	5354.51	NA	NA	10795.6	4288.67	NA	5318.28	8148.53	NA	NA	NA	14932.2	NA	NA	NA	9027.94	NA	NA	9877.78	6416.33	NA	NA	NA	8366.85	7207.97	NA	NA	NA	8133.55	NA	14912.5	17487.5	11516.1	12460.9	NA	4572.84	13528.8	8254.56	7095.13	7566.45	NA	10347.8	9195.67	5446.27	12156.7	10046.7	5760.69
_[Acetyl (Protein N-term)]S[Phospho (STY)]ET[Phospho (STY)]APAETATPAPVEK_.2	62776.4	NA	23695.2	27391.2	74045.1	64299.7	21587.4	23934	78517.2	68890.1	30444	84564.4	42316.4	NA	30162.8	24943.7	91719.3	77518.5	79688.7	30318.1	62522.1	21428.8	16628.4	61039.6	26067.9	124009	24036.9	52433.3	42905.3	108496	26028.6	47187.9	124284	110943	91695.2	53018.8	18618.6	27584	81255.7	67813.9	20358.8	59297.5	53671.7	33606.8	75404.8	74619.5	108417	76489.8	32576.9
_[Acetyl (Protein N-term)]S[Phospho (STY)]ETAPAAPAAAPPAEK_.2	10948291	215635	11048331	7275584	10609482	6540639	6.72763e+06	3.55761e+06	11662746	7420144	10422360	5180515	12882091	13040686	4889212	7767892	14290362	10944589	12548056	10345547	7.53467e+06	10181782	5507910	10081833	14336896	10862099	7184080	7673320	27506640	15830803	6590866	22066474	9731614	22066482	18886148	20133536	3.19803e+06	9282473	12744971	10291580	7.72723e+06	9428794	7381188	10267624	3555433	7587625	10323226	4.55112e+06	7134306
_[Acetyl (Protein N-term)]S[Phospho (STY)]ETAPAAPAAPAPAEK_.2	12004435	237180	12030819	8035318	11736569	7262829	7.43592e+06	9280953	9045486	8203259	11545688	12199805	14273248	14342525	11393929	8594763	15840700	12087089	13898596	11370145	8360481	7792253	6.0945e+06	7806549	15848605	12029102	7.97161e+06	8480372	20669390	17420012	15653917	17202822	11246970	24137180	21007968	22271238	7426623	10254782	14005447	11374674	8489117	10367632	8.1295e+06	11345405	7.64578e+06	8377797	11442602	10831203	7880810
_[Acetyl (Protein N-term)]S[Phospho (STY)]ETAPAAPAAPAPAEKT[Phospho (STY)]PVK_.2	261133	41918.1	292038	299440	448949	536532	525208	571370	576832	454500	755096	268514	206096	200300	122668	162409	217754	177550	345014	311352	597468	447106	381324	381197	326787	461015	257722	306802	118264	128433	159484	119090	101596	189304	121513	123103	46092.8	162789	477855	331203	318101	406414	416385	564231	740986	676961	965211	661990	112662
_[Acetyl (Protein N-term)]S[Phospho (STY)]ETAPAAPAAPAPAEKT[Phospho (STY)]PVKK_.3	88070.1	36004.6	90685.5	95532	147202	208981	168861	189666	222848	179392	306500	89247	54526.8	61110.4	36916.6	57969.8	59929.3	80951.2	108750	105090	201071	139727	122415	122382	97809.5	137430	89754.1	92017.4	NA	38242.9	51946.3	39114.2	36984.5	58720.1	50583.4	38844.8	23505.5	60567.7	157652	124698	124761	161035	131447	197871	243507	268692	318169	202631	39053.6
_[Acetyl (Protein N-term)]S[Phospho (STY)]ETAPAETAT[Phospho (STY)]PAPVEK_.2	115460	22108.7	95380.5	79324.5	136722	115513	100913	114474	125296	117734	108127	158928	119153	126390	85866.3	65763.8	145162	117659	119567	98796.1	110053	84088.6	67164.4	99495.7	154196	199163	101452	80150.8	218383	181964	166582	148990	191330	265737	197157	205675	NA	90556.7	116716	97930.2	87141.8	94832.9	97718.8	117234	109051	103081	142527	107377	54699.7
_[Acetyl (Protein N-term)]S[Phospho (STY)]ETAPAETATPAPVEK_.2	49521768	735607	32645808	30605838	42161248	27867494	29802824	28777486	30934996	32772218	37212416	41143872	49170792	54659984	38740852	28484670	61110788	45058200	45490376	37081764	28614718	29405088	20693534	30439032	53673768	44362436	33423630	30427036	74879816	62886556	54735272	57470764	79318416	91242776	64043832	69810616	22370070	33565760	39505440	34433588	26686816	32381856	27938124	31740680	24296012	25841874	35805896	30227484	22818842
_[Acetyl (Protein N-term)]S[Phospho (STY)]ETAPAETATPAPVEKS[Phospho (STY)]PAK_.2	832388	375846	1.45457e+06	1.01611e+06	930043	1292175	1.46469e+06	1.84656e+06	2.25488e+06	1.57093e+06	2.84526e+06	1.15395e+06	844122	780996	712646	653292	605155	511185	802932	801444	1666460	1301236	1.06656e+06	1.19632e+06	1165598	1.27363e+06	1.02117e+06	1.22081e+06	457851	578477	601248	519530	292296	414221	331594	303042	43114.5	268114	1.93322e+06	1.00595e+06	559127	596707	846802	1.29523e+06	1.85067e+06	2.01401e+06	3.10556e+06	2.55759e+06	266928
_[Acetyl (Protein N-term)]S[Phospho (STY)]ETAPAETATPAPVEKS[Phospho (STY)]PAKK_.3	NA	13820.9	60109.2	28147.6	NA	41565.7	46777.7	52679.5	91768.3	63450.8	159820	NA	NA	NA	NA	NA	NA	NA	NA	NA	57602.4	48758.4	37100.9	40296.2	NA	24663.8	40432.2	NA	NA	NA	19799.5	NA	NA	12771.8	NA	NA	NA	NA	62661.4	NA	NA	NA	NA	NA	65463.1	66476.8	125106	NA	NA
_[Acetyl (Protein N-term)]S[Phospho (STY)]ETAPLAPTIPAPAEK_.2	1.13114e+06	NA	444635	474085	816558	618280	406823	450295	640760	783046	525547	709475	935372	981595	589827	499965	1.1491e+06	839630	626634	562761	597323	651073	279806	378204	1.58903e+06	1.02828e+06	479178	525264	1.69544e+06	1.55579e+06	1.0158e+06	887344	1.61735e+06	1.74653e+06	1.27694e+06	1.16395e+06	2.26784e+06	3.84395e+06	3.62679e+06	4.16306e+06	2.55706e+06	3.34943e+06	1.95052e+06	2337993	2.28419e+06	2.1721e+06	4.13521e+06	2.71511e+06	2.01745e+06
_[Acetyl (Protein N-term)]S[Phospho (STY)]ETAPLAPTIPAPAEKT[Phospho (STY)]PVK_.2	45795.8	NA	NA	NA	58668.2	62939.2	NA	NA	57818.3	57426	57321.4	NA	NA	NA	NA	NA	NA	NA	NA	NA	51680.4	50282.6	NA	NA	53177.3	62182.7	NA	36295.8	NA	NA	NA	NA	NA	39862.7	NA	NA	19946.9	71355.9	120399	112176	110174	137941	125057	156160	200086	205037	292600	185902	NA
_[Acetyl (Protein N-term)]S[Phospho (STY)]FAESGWR_.2	NA	NA	NA	NA	12842.5	8945.55	13286.1	NA	9874.83	NA	10867.6	NA	15413.5	15326.3	NA	NA	NA	12331.8	14011.3	10990.1	NA	NA	10517.4	NA	NA	14055.9	NA	NA	15437.1	12230.6	11344.7	NA	20672.5	27609.4	19645.3	20351.8	4637.76	12225.9	16227.4	NA	9400.62	12733.8	10309.2	12409.6	13913.3	13863.4	21920.5	16572.4	NA
_[Acetyl (Protein N-term)]S[Phospho (STY)]FDPNLLHN[Deamidation (NQ)]NGHN[Deamidation (NQ)]GYPN[Deamidation (NQ)]GTSAALR_.3	726132	NA	350238	319961	828476	204045	964405	896379	264584	803479	566408	516484	673424	265448	276824	406300	288494	187610	450527	316227	291046	413391	286581	722336	603565	137095	425348	530802	236400	236657	234113	223298	253952	532899	665764	318116	36758.6	96666.5	156501	293620	109030	203353	334732	178125	165521	544497	259614	242471	154916
_[Acetyl (Protein N-term)]S[Phospho (STY)]FFNFRK_.2	NA	NA	NA	NA	NA	NA	NA	NA	NA	NA	NA	NA	NA	NA	NA	NA	7319.05	NA	NA	NA	NA	NA	NA	NA	NA	NA	NA	NA	NA	NA	NA	NA	NA	NA	NA	NA	NA	NA	NA	NA	NA	NA	NA	NA	NA	NA	NA	NA	NA
_[Acetyl (Protein N-term)]S[Phospho (STY)]FIDPYQ[Deamidation (NQ)]HIIVEHQYSHK_.3	NA	NA	NA	NA	NA	NA	NA	NA	NA	NA	NA	NA	NA	NA	NA	NA	NA	NA	NA	NA	NA	NA	NA	NA	NA	NA	NA	NA	NA	NA	NA	NA	NA	NA	NA	NA	NA	NA	NA	NA	22195.7	NA	135810	NA	NA	NA	NA	NA	NA
_[Acetyl (Protein N-term)]S[Phospho (STY)]FIDPYQHIIVEHQYSHK_.3	NA	NA	31990	NA	NA	NA	42728.3	NA	NA	34575.5	NA	NA	52707.4	NA	30551.4	NA	NA	NA	48595.4	NA	NA	39051.4	NA	NA	49300.7	NA	NA	NA	60433.9	NA	NA	NA	66516.4	57059.3	38949.1	47839	NA	35428.4	NA	NA	26540.4	NA	NA	NA	NA	NA	NA	NA	NA
_[Acetyl (Protein N-term)]S[Phospho (STY)]FLFSSR_.2	1795.78	NA	1220.55	1957.36	3679.69	1785.72	540.955	NA	NA	959.375	NA	NA	2791.24	6110.22	1930.03	3714.58	14685.8	4540.58	2012.19	3610.29	1813.3	2854.98	NA	1562.73	2920.03	16964.2	3690.67	5433.67	5326.01	2264.36	NA	NA	2553.65	6507.66	2896.61	3700.74	2690.95	2989.43	3366.97	3271.23	NA	5241.57	3020.19	1896.27	5069.11	NA	2939.11	1782.46	4062.76
_[Acetyl (Protein N-term)]S[Phospho (STY)]FVAGVIR_.2	NA	NA	NA	NA	1016.02	NA	NA	NA	NA	NA	NA	NA	779.879	NA	NA	NA	NA	NA	NA	NA	NA	NA	NA	NA	NA	NA	NA	NA	1250.8	NA	NA	NA	2383.48	2532.03	NA	1891.69	NA	NA	NA	NA	NA	NA	NA	NA	NA	NA	NA	NA	NA
_[Acetyl (Protein N-term)]S[Phospho (STY)]GALDVLQMK_.2	4454.12	NA	NA	4919.08	5826.1	4050.51	4724.17	4316.69	4350.14	3059.32	4334.65	NA	3625.64	NA	NA	2085.32	6517.98	5180.69	NA	NA	3878.88	NA	3108.08	NA	5947.62	4429.56	5079.18	4127.14	10580.8	5447.78	8402.07	6834.13	25483.3	27445.6	21424.9	21238.5	NA	NA	NA	NA	NA	NA	NA	NA	NA	NA	NA	NA	NA
_[Acetyl (Protein N-term)]S[Phospho (STY)]GDEM[Oxidation (M)]IFDPTM[Oxidation (M)]SK_.2	801359	NA	724499	831722	696388	951251	857233	853989	756136	567061	998708	1083792	668792	1.45345e+06	853246	779204	649460	624022	1.27335e+06	944016	818748	786527	684586	1.16563e+06	864049	1.45347e+06	744274	1.14827e+06	660866	879576	1.03179e+06	1097098	629876	735039	779800	821744	1.15377e+06	653655	501757	847786	679655	864127	553018	563549	636351	633762	735721	682816	571501
_[Acetyl (Protein N-term)]S[Phospho (STY)]GDEM[Oxidation (M)]IFDPTMSK_.2	2.96491e+06	56861.4	1.87818e+06	2854812	2.62009e+06	2693951	2.08417e+06	2.71357e+06	2.25963e+06	2128550	3.63985e+06	3.01605e+06	2.42483e+06	2.98033e+06	2179220	2.58007e+06	2.51614e+06	2.01042e+06	2.96441e+06	2884287	2.35526e+06	2.49682e+06	2470796	3047436	2.78498e+06	2.77278e+06	1.92348e+06	3786108	2.26656e+06	2.44524e+06	2254363	3.27025e+06	1.92421e+06	1.97934e+06	2.53555e+06	2216882	1.42746e+06	1.76961e+06	1.85444e+06	2.13123e+06	1.85838e+06	1.93541e+06	1.98776e+06	1.82402e+06	2.14807e+06	1.67021e+06	2732661	2445288	2.18695e+06
_[Acetyl (Protein N-term)]S[Phospho (STY)]GDEM[Oxidation (M)]IFDPTMSKK_.2	NA	NA	NA	NA	NA	NA	NA	NA	NA	NA	55934.4	NA	NA	NA	NA	NA	NA	NA	NA	NA	NA	NA	NA	NA	NA	NA	NA	NA	NA	NA	NA	NA	NA	NA	NA	NA	NA	NA	NA	NA	NA	NA	NA	NA	NA	NA	NA	NA	NA
_[Acetyl (Protein N-term)]S[Phospho (STY)]GDEMIFDPTM[Oxidation (M)]SK_.2	2896927	110031	2.71315e+06	2.82916e+06	2.54214e+06	3.01707e+06	2.71886e+06	2.91168e+06	3.04525e+06	2.40898e+06	3.85792e+06	3.62597e+06	2.86615e+06	4000122	2.92315e+06	2.75289e+06	2.9231e+06	2.61439e+06	3989761	3.36588e+06	2837562	2.76168e+06	2.68502e+06	3.41809e+06	2.89543e+06	4.19466e+06	2413650	4.12152e+06	2.40926e+06	3.49268e+06	3.12883e+06	3518956	2.16771e+06	3.04208e+06	2.5434e+06	2409537	1.1131e+06	2.03397e+06	2.31169e+06	2.65902e+06	2460033	2.56966e+06	1.96231e+06	2.04093e+06	2.16297e+06	2.18667e+06	3108909	2.73631e+06	2.24403e+06
_[Acetyl (Protein N-term)]S[Phospho (STY)]GDEMIFDPTM[Oxidation (M)]SKK_.2	NA	NA	NA	NA	NA	NA	NA	NA	NA	225932	178004	172330	NA	NA	NA	NA	NA	NA	NA	NA	NA	204819	NA	113200	NA	NA	NA	NA	NA	NA	NA	NA	NA	NA	NA	NA	NA	NA	NA	NA	NA	NA	NA	NA	NA	NA	146005	NA	NA
_[Acetyl (Protein N-term)]S[Phospho (STY)]GDEMIFDPTMS[Phospho (STY)]K_.2	NA	NA	13330.6	20510.6	16845	23558.4	9312.74	18621.2	19633.7	13562.6	16231.6	13108.7	NA	27546.2	12726.1	33732.9	37555.5	36202.6	14705.5	25103.7	NA	21980.5	10699.2	NA	NA	98481	27353.2	26482.1	26577.1	40162.9	24957.5	20606.7	11647.8	53379.9	NA	20635.3	NA	NA	28616	13930.3	NA	16066.3	8716.58	10431.7	29805.2	NA	64378.9	21157	NA
_[Acetyl (Protein N-term)]S[Phospho (STY)]GDEMIFDPTMSK_.2	20711338	264395	14044998	17672624	13909612	12245539	15422829	19721140	20678588	16436176	21582428	18370482	19271578	18436476	17374004	16395578	20368008	14739910	15130602	17949652	16205360	16138565	16585093	14379976	15690132	16278428	15611435	17080090	14984286	14239807	16015754	15808768	10314683	12696419	10874351	10973704	2.70981e+06	9377911	18304696	15710983	10729340	13492220	11988570	13115507	15315170	13775747	22906950	19274100	12929442
_[Acetyl (Protein N-term)]S[Phospho (STY)]GDEMIFDPTMSKK_.2	56019.6	NA	142996	67785.4	63262.8	108457	111627	166237	217705	150530	469952	282810	74765	148273	106587	95966.9	136821	137751	63950.4	71675.9	141822	155148	103354	195644	61077.6	62926.2	114363	82080.9	47415.2	114159	64504.6	56509.7	35837.4	53646.8	43560.7	40044.9	4647.23	28776	181904	53999.8	35414.6	39894.3	45467.2	46481.7	203320	147697	267893	223382	29131.2
_[Acetyl (Protein N-term)]S[Phospho (STY)]GDGATEQAAEYVPEK_.2	20442.7	NA	14017.8	13159.1	15519.4	12188.4	11578.3	10519	NA	NA	NA	13707.5	23692	31764.9	16097.8	16407.9	30612.2	22701.8	30474.4	20677.2	20767.9	17432.3	NA	12654	22757.4	22946.8	14511.5	15178.2	39313.6	27101.1	28169.7	24427.9	44240.9	53115.8	36241.7	41460.5	10483.4	24047	29042	28306.4	15384.4	26734.7	17946.1	25068	20499.7	19011.1	32195.3	24086.1	28879.2
_[Acetyl (Protein N-term)]S[Phospho (STY)]GDHLHNDS[Phospho (STY)]Q[Deamidation (NQ)]IEADFR_.3	NA	NA	28983	NA	NA	NA	NA	NA	NA	41854.7	NA	NA	NA	NA	NA	NA	NA	NA	29022.9	NA	NA	NA	NA	NA	NA	NA	26457.4	NA	NA	NA	29701.5	NA	NA	NA	NA	43552.1	NA	NA	38378.1	NA	NA	NA	NA	NA	NA	32303.9	40059.1	NA	NA
_[Acetyl (Protein N-term)]S[Phospho (STY)]GDHLHNDS[Phospho (STY)]QIEADFR_.3	48717.5	32884.9	35047.3	30396.2	47662.7	NA	41022.6	NA	22932.7	45373.9	NA	28420.2	48880.4	47901.3	29666.5	30111.4	47698.9	38146.3	42573.7	35961.6	28526.8	38760.1	NA	NA	59895.7	45346.6	35039	35553.8	62467.9	50075.3	47353.5	44865.5	64896.6	102613	59096.4	67620.8	NA	48480.8	46647.1	38312.1	NA	52541.2	30883.4	33768.9	NA	36605.8	52258.3	33296.1	40259.3
_[Acetyl (Protein N-term)]S[Phospho (STY)]GDHLHNDSQIEADFR_.2	59040	NA	35547.7	32668.8	52382.1	31333.8	29057.7	42036.8	26311.4	41473.4	35001.2	47207.4	40124.9	51991.5	31470.4	33044.4	55369.9	37551	54766.2	40397.8	39304	41712	27158.5	32041.5	64682.4	42508.4	33379.1	33592.3	73244.1	48672.9	48493.2	45348.8	63446.3	71186.8	53498	65846.6	22355.8	43019.5	67523.1	49810.4	34265.6	59063.5	56092.8	56572.1	55697.5	50526.9	65270.6	64828.5	42185.3
_[Acetyl (Protein N-term)]S[Phospho (STY)]GEDEQ[Deamidation (NQ)]QEQTIAEDLVVTK_.3	6000688	329292	5517205	4.46875e+06	4746338	4734576	4.75462e+06	5603863	6181483	5.32429e+06	5.82234e+06	5.30355e+06	5.42785e+06	5.88072e+06	5431903	5474072	5541514	4.48288e+06	5387782	5.32257e+06	4832849	5.10611e+06	4.73755e+06	4.87125e+06	6.21023e+06	6105996	4.78922e+06	6308185	5.29685e+06	6.69178e+06	5350835	6029622	5.59676e+06	4632332	4.55352e+06	4.50698e+06	1116943	6.35924e+06	8.38763e+06	7629518	5.0182e+06	6.46341e+06	6273175	5.69286e+06	5824881	5913617	8065244	5.79231e+06	5199566
_[Acetyl (Protein N-term)]S[Phospho (STY)]GEDEQQ[Deamidation (NQ)]EQ[Deamidation (NQ)]TIAEDLVVTK_.3	NA	NA	23607.7	43001.2	NA	52579.2	39534	NA	33188.9	NA	NA	62567.9	NA	37224.1	NA	58966.2	NA	NA	NA	NA	NA	NA	45234.6	NA	NA	NA	51074.6	NA	NA	54570.3	74066.6	NA	35629.5	37665.8	42776.7	56861.2	NA	14332.2	58528.7	NA	NA	72781.3	NA	25647.5	NA	NA	122182	19846.9	NA
_[Acetyl (Protein N-term)]S[Phospho (STY)]GEDEQQ[Deamidation (NQ)]EQTIAEDLVVTK_.2	8469016	364877	8379728	7.34367e+06	6546352	6297728	6.66269e+06	8569435	8050003	7.6269e+06	7.98107e+06	8773953	7927759	9376542	7597445	7896817	7.44956e+06	6.45324e+06	8443953	8429778	6807166	6832600	7614880	7.515e+06	8751408	9296511	6.4517e+06	9225289	7.02191e+06	8600378	8524442	8839900	7.6429e+06	8.33155e+06	6.8592e+06	6.35631e+06	1.64685e+06	8397619	10606754	11308182	6.85854e+06	9732049	8.09793e+06	7159371	8431639	7.33309e+06	12293595	7491010	8008011
_[Acetyl (Protein N-term)]S[Phospho (STY)]GEDEQQEQ[Deamidation (NQ)]TIAEDLVVTK_.2	8745195	381569	8708697	7501910	6752827	6.4667e+06	6.82026e+06	8852133	8233673	7832338	8.24533e+06	9072161	8128770	9590114	7.79486e+06	8141549	7635421	6582768	8742291	8720398	6970629	7.03677e+06	7.82263e+06	7.76146e+06	8986103	9603379	6.6551e+06	9605329	7.25041e+06	8828559	8827344	9219301	7891321	8536241	7066980	6647791	1739202	8711722	10941701	1.1598e+06	7116739	10091133	8426942	7.30914e+06	8718160	7563906	12711504	7699567	8.30204e+06
_[Acetyl (Protein N-term)]S[Phospho (STY)]GEDEQQEQTIAEDLVVTK_.2	9265913	392103	9103236	7.97349e+06	7.11219e+06	6.84524e+06	7242376	9350471	8735505	8292539	8650190	9521973	8597061	10190327	8.23171e+06	8599170	8062692	7095770	9162670	9170585	7.3791e+06	7426189	8277827	8.14898e+06	9495922	10088875	7010013	10089500	7609824	9262907	9261207	9591460	8.28442e+06	9026070	7.45058e+06	6913926	1.79197e+06	9097424	11526303	12276920	7480874	10556613	8809251	7774869	9142211	7981982	13336390	8.19662e+06	8541974
_[Acetyl (Protein N-term)]S[Phospho (STY)]GFLEGLR_.2	3059.63	NA	1797.87	NA	3211.22	2640.94	2632.89	2509.22	3664.44	3750.55	5001.71	4235.36	NA	2059.64	NA	1330.27	2297.14	1267.09	1451.3	NA	1802.76	1568	1642.22	2093.68	3354.07	3011.72	NA	NA	3391.07	NA	2144.13	2189.03	3841.16	2822.34	2263.24	2023.23	NA	1294.3	2651.66	2247.25	NA	1573.34	2817.71	2257.88	1974.99	2892.09	4768.79	2591.3	1720.89
_[Acetyl (Protein N-term)]S[Phospho (STY)]GGPMGGRPGGR_.2	NA	NA	NA	NA	NA	NA	NA	NA	NA	NA	NA	NA	NA	NA	NA	NA	NA	NA	NA	NA	NA	NA	NA	NA	NA	NA	NA	NA	NA	NA	NA	9947.48	9898.94	17338.1	NA	10009	NA	NA	NA	NA	NA	NA	NA	NA	NA	NA	NA	NA	NA
_[Acetyl (Protein N-term)]S[Phospho (STY)]GWESYYK_.2	57292.9	3179.68	48965.9	30755.6	34501.3	21602.9	45845.6	40112.1	42825.9	43007.2	37164.1	38748.7	24813.7	67197.6	42669.3	29224	38401.2	33200	102918	41176.9	39014.8	64890.6	27672.2	42248.8	51057.8	43255.3	46882.6	29789.6	57788.7	74422.3	44186.5	50559.8	82491.4	71895	67643.3	73985.2	7576.64	24965.6	24707.8	15243.3	14282.2	45216.2	30134.5	23271.6	17792.9	23048.3	33825.4	30113.8	24262.4
_[Acetyl (Protein N-term)]S[Phospho (STY)]HTILLVQPTK_.2	NA	NA	NA	NA	NA	NA	NA	NA	NA	NA	NA	NA	NA	NA	NA	NA	NA	NA	NA	NA	NA	NA	NA	NA	NA	NA	NA	NA	NA	NA	NA	NA	16183	16102.2	10516.9	13366	NA	NA	NA	NA	NA	NA	NA	NA	NA	NA	NA	NA	NA
_[Acetyl (Protein N-term)]S[Phospho (STY)]HVAVENALGLDQQFAGLDLNSSDNQSGGSTASK_.4	NA	NA	32376.4	37030.3	NA	31620.6	NA	NA	35416.7	NA	NA	NA	NA	58148.9	38958.5	41890.1	NA	NA	NA	NA	38087.9	48147.5	41558.2	28826.2	NA	36386.9	NA	25560.4	NA	31919.7	NA	NA	NA	NA	NA	NA	NA	NA	49730.9	32104	13733.8	NA	NA	25796	28698.1	27882.4	38893.3	NA	17237.8
_[Acetyl (Protein N-term)]S[Phospho (STY)]LDIQ[Deamidation (NQ)]SLDIQC[Carbamidomethyl (C)]EELSDAR_.2	1304143	121302	1.08579e+06	811447	1.16287e+06	721282	899866	797576	766470	809724	643114	655289	1.13748e+06	1.06912e+06	926593	1.042e+06	901135	554965	1401597	1.0071e+06	909243	1153506	867245	725203	1.44522e+06	786081	778006	1.04538e+06	1.47819e+06	900208	874129	1.01825e+06	1.67789e+06	1.13917e+06	1.20475e+06	1.08667e+06	307876	1169163	945870	1.21647e+06	851327	1.40825e+06	1.10518e+06	753270	666498	964319	937044	895829	1.51042e+06
_[Acetyl (Protein N-term)]S[Phospho (STY)]LDIQS[Phospho (STY)]LDIQC[Carbamidomethyl (C)]EELSDAR_.3	NA	NA	NA	22361.9	NA	NA	NA	NA	22504	22018.5	NA	NA	NA	NA	23884.4	18126	NA	NA	32018.6	20309.3	NA	32909.8	28980.5	13212.7	37569.9	NA	NA	17158.2	24913.4	18988.9	21430.8	19710.5	37708.1	30514.5	27168.9	29214.3	NA	NA	NA	NA	NA	NA	22261.4	NA	NA	26478.3	NA	17948	NA
_[Acetyl (Protein N-term)]S[Phospho (STY)]LDIQSLDIQ[Deamidation (NQ)]C[Carbamidomethyl (C)]EELSDAR_.2	1.24321e+06	NA	1.00009e+06	772798	1.10003e+06	681797	829953	775735	697804	763323	615313	613236	1.05011e+06	991077	854436	964047	843152	563866	1.3012e+06	932882	805110	1.05287e+06	808838	666075	1.33684e+06	729059	713064	977780	1.35214e+06	869099	810996	927273	1.54251e+06	1.0434e+06	1.12377e+06	1.01322e+06	293845	1.09619e+06	868328	1.11193e+06	806531	1300417	1.04783e+06	701123	614108	879089	836072	855350	1.3794e+06
_[Acetyl (Protein N-term)]S[Phospho (STY)]LDIQSLDIQC[Carbamidomethyl (C)]EELSDAR_.2	1.47612e+06	138473	1.27405e+06	944937	1.35635e+06	828176	1.04017e+06	961017	874957	942666	765795	748550	1.31249e+06	1.2674e+06	1.08147e+06	1.23337e+06	1.05087e+06	662211	1.62477e+06	1.17443e+06	1.00782e+06	1.34313e+06	999993	837954	1.67046e+06	917412	904118	1221923	1.70406e+06	1.04361e+06	1.01215e+06	1.15903e+06	1.95575e+06	1.33939e+06	1.43998e+06	1.2605e+06	376328	1.40718e+06	1.05957e+06	1.41066e+06	1.00007e+06	1675388	1.29205e+06	874544	779582	1.13286e+06	1.12628e+06	976448	1.7508e+06
_[Acetyl (Protein N-term)]S[Phospho (STY)]LEDPFFVVR_.2	NA	NA	NA	10036.9	NA	NA	NA	NA	NA	NA	NA	9120.01	NA	13316	NA	18362.9	NA	NA	NA	NA	NA	NA	9812.29	10766.1	NA	NA	5747.22	NA	NA	NA	NA	NA	12875.7	NA	NA	NA	NA	NA	NA	NA	NA	NA	NA	NA	NA	NA	NA	NA	NA
_[Acetyl (Protein N-term)]S[Phospho (STY)]LEQ[Deamidation (NQ)]EEETQPGR_.2	NA	NA	NA	NA	NA	NA	NA	NA	NA	NA	NA	NA	NA	NA	NA	NA	NA	NA	37973.8	NA	NA	NA	NA	NA	NA	NA	NA	NA	NA	NA	NA	NA	58051.5	NA	48248.5	50476.9	NA	NA	NA	NA	NA	NA	NA	NA	NA	NA	NA	NA	NA
_[Acetyl (Protein N-term)]S[Phospho (STY)]LEQEEETQ[Deamidation (NQ)]PGR_.2	NA	NA	NA	NA	NA	NA	NA	NA	NA	NA	NA	NA	NA	NA	NA	NA	NA	NA	NA	NA	NA	NA	NA	NA	NA	NA	NA	NA	NA	NA	NA	NA	39985	NA	NA	NA	NA	NA	NA	NA	NA	NA	NA	NA	NA	NA	NA	NA	NA
_[Acetyl (Protein N-term)]S[Phospho (STY)]LEQEEETQPGR_.2	41459.8	NA	30105.6	23651.3	35492.4	NA	26589.1	32534.5	NA	30582.1	29040.7	28394.1	NA	NA	25044.3	NA	47168.6	23912.4	32474.1	31833.2	43389.9	33448.2	NA	NA	38768	NA	24595.3	22185	54398.7	33802.7	28800.4	29477.7	53512.8	NA	38668.9	44006.5	NA	NA	50830.2	NA	NA	53752	NA	26196.3	NA	34786.8	30106.1	29570.5	NA
_[Acetyl (Protein N-term)]S[Phospho (STY)]LLDGLASSPR_.2	NA	NA	NA	NA	NA	NA	NA	NA	NA	NA	NA	453.305	NA	NA	NA	NA	NA	NA	NA	NA	NA	1069.92	NA	NA	NA	NA	NA	NA	NA	NA	NA	NA	NA	NA	NA	NA	NA	NA	NA	NA	NA	NA	NA	NA	NA	NA	NA	NA	NA
_[Acetyl (Protein N-term)]S[Phospho (STY)]LQYGAEETPLAGSYGAADSFPK_.3	21105.5	NA	14176.2	NA	16871.2	29588.8	23499.4	25023.6	19172.9	23368.6	24806.6	19398	31941.9	39684	21576	18509	41291.6	27939.8	31530.7	30740.6	22186.5	29879.8	25471.5	21547	27109.8	11856.1	21200.9	17430.6	NA	37497.1	25332.8	24918.2	34988.8	38171.7	26243.2	28465.4	6995.68	14849.2	35790.4	12980.9	17194.9	22317.7	22410.6	26491	21614.5	19685.4	33478.6	19988.1	18586.7
_[Acetyl (Protein N-term)]S[Phospho (STY)]LSHLYR_.2	19569.2	NA	14340.5	11178.6	20397.2	11676.4	15843.5	16654.7	10345.2	10039.6	13932.3	15428.3	18140.9	17854.6	11591.2	10490.8	23917.5	9782.78	21582.2	16370.9	18505.2	17750.5	8746.7	12387.1	22235.3	10728.4	8437.98	12240.1	24091.7	13758.4	13542.6	16759.3	21501.8	18493.6	17174.7	19452.1	NA	NA	NA	NA	2858.99	7965	NA	NA	6713.56	5631.95	10715.1	NA	3898.48
_[Acetyl (Protein N-term)]S[Phospho (STY)]LYDDLGVETSDSK_.2	NA	NA	28831.7	26857.5	58532.4	NA	NA	NA	59505.5	50395.6	29799.6	77012.3	60055.4	79658.9	50519.1	34178.6	56315.3	67356.1	52250.1	39267.4	48442.5	65476.7	37574.6	41044.3	61121.8	NA	30871.3	26954.4	54018.1	40557.5	40662.9	34116.3	58580.3	69024.3	59261	59875.5	7940.96	33998.1	NA	43063.8	NA	41901.2	44819.6	NA	37349.2	31443	72881.5	36330.1	69198.3
_[Acetyl (Protein N-term)]S[Phospho (STY)]M[Oxidation (M)]EDPFFVVK_.2	3789.43	NA	2940.17	2080.08	4646.26	3908.98	2371.66	NA	NA	NA	1067.25	NA	4584.83	4145.83	2610.61	3597.88	NA	NA	5177.38	4197.2	NA	3766.21	NA	1722.66	6655.49	3806.32	961.405	5946.97	3061.95	5351.33	NA	3231.55	4947.83	5201.85	4191.08	2445.32	7346.29	10971.9	5821.71	7998.27	3840.03	11351.5	6833.69	2680.9	2584.81	6231.85	5604.21	2548.01	12771.4
_[Acetyl (Protein N-term)]S[Phospho (STY)]M[Oxidation (M)]PDAM[Oxidation (M)]PLPGVGEELK_.2	NA	NA	NA	NA	NA	NA	NA	NA	NA	NA	NA	NA	NA	NA	NA	NA	NA	NA	NA	NA	NA	NA	NA	NA	NA	NA	NA	NA	NA	NA	NA	NA	NA	NA	NA	NA	5626.73	NA	NA	NA	NA	NA	NA	NA	NA	NA	NA	NA	NA
_[Acetyl (Protein N-term)]S[Phospho (STY)]M[Oxidation (M)]PDAMPLPGVGEELK_.2	NA	NA	15892.1	NA	26012.3	17419.8	21758.2	24212.1	12474.3	18452.9	17421	18966.5	17238.5	37016.5	19176.2	14201	22754.6	14299.2	48919.3	22143.1	20026.2	34603.6	17504.7	23813.2	22472.3	NA	NA	13019	29448	27942.1	14382.2	26021.2	38267	24830.1	30287.1	31116.6	8089.47	12535.5	NA	NA	12650.9	24331.7	15137.2	NA	10934	17550.1	30320.2	16657.6	19472.8
_[Acetyl (Protein N-term)]S[Phospho (STY)]MEDPFFVVK_.2	27602.9	NA	5857.87	16646.3	NA	19914.6	20557.8	31540.1	NA	21054.3	23523.2	NA	11338.3	NA	19379.5	NA	10582.9	NA	16583.2	13384.8	NA	19257.3	NA	10778.8	NA	NA	11356.1	44480.2	32226.3	NA	18895.3	NA	NA	NA	16188.7	13173.8	NA	NA	NA	43296	NA	7365.86	36984.9	14587.1	42645.8	16190.4	57270	49796.6	NA
_[Acetyl (Protein N-term)]S[Phospho (STY)]MPDAM[Oxidation (M)]PLPGVGEELK_.2	19843	NA	NA	NA	NA	NA	NA	NA	NA	NA	14875.4	NA	NA	16800.5	NA	NA	NA	NA	23599.4	13773.8	15755.7	25769.3	NA	17350.1	NA	NA	NA	NA	21004.8	NA	NA	12497.7	20959.9	17806.9	16390.7	19102	NA	8608.6	NA	NA	NA	14437.7	10933.9	17926.9	NA	12857.5	NA	NA	11996.5
_[Acetyl (Protein N-term)]S[Phospho (STY)]MPDAMPLPGVGEELK_.2	NA	NA	8590.86	NA	86633.7	48360.5	47103.2	NA	15028.3	NA	49709.6	82334.7	23317.2	81718.1	24619.8	35102.7	NA	NA	32201.1	74031.2	NA	101227	49345.3	91254.5	NA	NA	49325	46272.5	64064.5	NA	21178.1	NA	105232	NA	35503.8	106598	14496.6	11108.8	NA	31669	NA	76287.9	34054.5	NA	18028.8	54268.5	86894.6	23924.7	66012.8
_[Acetyl (Protein N-term)]S[Phospho (STY)]N[Deamidation (NQ)]GYEDHMAEDC[Carbamidomethyl (C)]R_.2	NA	NA	NA	NA	NA	NA	NA	NA	NA	NA	NA	NA	NA	NA	NA	NA	NA	NA	NA	NA	NA	NA	NA	NA	NA	NA	NA	NA	126820	NA	NA	79173.4	89916.6	NA	NA	NA	NA	34152.6	NA	NA	NA	49717.4	NA	NA	NA	NA	NA	NA	53308.8
_[Acetyl (Protein N-term)]S[Phospho (STY)]N[Deamidation (NQ)]GYEDHMAEDC[Carbamidomethyl (C)]RGDIGR_.3	94219.3	NA	83877.4	57064.2	90520	59024.4	64719.1	86853.6	73201	75246.4	65474.4	67834.5	85135	95287.9	58848.4	53301.5	115016	63727	65213.9	57037.8	62269.2	73765.4	44644.9	45882.8	114905	73194	84334.2	55274.5	98527.9	104212	73531.1	78495.2	99616.4	121950	67143	74935.3	NA	43290.7	144727	92047.5	70255.4	64627.5	87300.8	112953	91179.4	79724	120026	117806	57940.8
_[Acetyl (Protein N-term)]S[Phospho (STY)]NGYEDHMAEDC[Carbamidomethyl (C)]RGDIGR_.3	94937.7	NA	84824.4	54573.7	90020.7	59426.3	69385.3	87140.2	70760.6	74416.7	67476.9	69455.8	89325.5	95833.7	61375.4	57593.7	115829	62140.8	68572.3	60012	62918.6	73970.7	47397.9	49663.6	117122	46461.8	86279.2	56274.8	99863.8	101405	74083.4	79179	97733.1	123889	67983.3	75253.7	NA	42592.1	149639	95346.9	72064.4	65918.9	90626.8	112431	93118	81061.7	117692	116675	25279.3
_[Acetyl (Protein N-term)]S[Phospho (STY)]PTPPLFSLPEAR_.2	NA	NA	NA	NA	NA	NA	NA	NA	NA	NA	NA	NA	NA	NA	NA	NA	NA	NA	7373.92	NA	NA	NA	NA	NA	NA	NA	NA	NA	NA	NA	NA	NA	NA	21389.9	NA	NA	NA	NA	NA	NA	NA	NA	NA	NA	NA	NA	NA	NA	NA
_[Acetyl (Protein N-term)]S[Phospho (STY)]Q[Deamidation (NQ)]ERPTFYR_.2	117729	NA	96501.8	84313.4	109104	73693.3	96000.9	99504.7	69812.4	53561	68674.9	79775.7	115104	124030	84079.8	77489.1	139186	95858.1	118946	90523.8	106708	84704.7	64915	84937.9	128898	101198	81048.3	96088.4	127883	103915	99633	95410.4	185926	222290	129436	175030	20166.6	31597.4	65956.4	50194.1	29126.2	40930.4	43382.4	46277.5	41870.9	49836.5	66804.6	61458.2	31631.8
_[Acetyl (Protein N-term)]S[Phospho (STY)]Q[Deamidation (NQ)]GDSN[Deamidation (NQ)]PAAIPHAAEDIQGDDRWMSQHNR_.3	644291	67141.3	546530	383165	327144	352430	437877	439834	356141	472717	539023	615653	490689	858932	567838	595796	765320	702231	1.2242e+06	647642	608665	1001297	539989	683426	480004	518394	498241	389497	726200	863170	611993	622787	1.03826e+06	1.65307e+06	1.11277e+06	1.13604e+06	43425	308880	419903	295369	251777	502183	330755	385708	434786	422852	615935	441427	381096
_[Acetyl (Protein N-term)]S[Phospho (STY)]Q[Deamidation (NQ)]GDSNPAAIPHAAEDIQGDDR_.3	352499	34949.7	268414	197754	266775	194743	279026	178335	192176	202481	180371	185140	295133	350844	336124	260825	309338	292608	698898	353311	316786	358467	241270	289787	315710	268241	182926	258281	522111	352877	421476	426559	853917	637186	735919	81792	216056	327713	221607	246155	209431	532224	240731	260417	182624	255792	311354	215428	335264
_[Acetyl (Protein N-term)]S[Phospho (STY)]QAEFEK_.2	6575.17	NA	6042.1	3618.39	5450.6	2945.03	4247.72	3288.68	NA	NA	3726.91	4430.83	10480.1	15729.1	10264.7	1894.95	14184.4	17443.4	16908.3	10046.7	8248.09	7777	745.231	5506.92	7881.03	4261.51	6359.19	4989.33	16587.4	10975.4	12324.3	14116.9	34022	27675.5	26560.9	28907.6	NA	4265.15	NA	NA	NA	4950.36	NA	2079.35	NA	1608.15	1686.93	NA	4865.82
_[Acetyl (Protein N-term)]S[Phospho (STY)]QEGDYGR_.2	NA	NA	NA	NA	NA	NA	NA	NA	NA	NA	NA	NA	NA	NA	NA	NA	NA	NA	NA	NA	NA	NA	NA	NA	NA	NA	NA	NA	3182.06	NA	NA	NA	NA	NA	NA	NA	NA	NA	NA	NA	NA	NA	NA	NA	NA	NA	NA	NA	NA
_[Acetyl (Protein N-term)]S[Phospho (STY)]QEGVELEK_.2	NA	NA	NA	NA	NA	NA	NA	NA	NA	NA	NA	NA	NA	NA	15149.9	NA	NA	NA	24553.6	NA	NA	18012.3	NA	NA	NA	NA	NA	NA	NA	NA	NA	NA	24846.1	35159.9	NA	NA	NA	NA	NA	NA	NA	NA	NA	NA	NA	NA	NA	NA	12103
_[Acetyl (Protein N-term)]S[Phospho (STY)]QERPTFYR_.2	130932	NA	105051	94487.6	119669	83764.6	106778	109501	77687.3	56117.2	74510.1	90365.2	130218	139341	98602.2	87095	154364	107012	135932	102249	116641	98098.4	69334.4	93088.9	138840	109748	90602.8	105672	141321	114795	111133	109733	210849	253779	146480	199211	20923.2	37411.9	72559.4	52856.8	35003.7	46757.1	46364.6	51746.9	44908.9	49186.8	70423.4	63281.6	37016.8
_[Acetyl (Protein N-term)]S[Phospho (STY)]QGDSNPAAIPHAAEDIQ[Deamidation (NQ)]GDDRWMSQHNR_.4	540281	NA	522478	338793	NA	362046	475246	417098	384625	NA	547863	109207	525373	62176.3	636672	128940	NA	716304	109623	NA	661433	930657	469826	NA	77883	NA	NA	397081	NA	181879	558932	650697	81634.8	NA	1.08433e+06	1.05623e+06	NA	NA	448373	NA	256488	NA	NA	NA	NA	273991	NA	431511	NA
_[Acetyl (Protein N-term)]S[Phospho (STY)]QGDSNPAAIPHAAEDIQGDDR_.3	407751	38616	306207	229584	307956	221248	322436	201872	222889	230833	210769	214327	334390	408008	387312	297340	353606	336286	813994	409944	364470	416033	277126	332589	369431	313851	204626	298129	606183	404609	492166	501344	986257	738366	851800	1.00127e+06	246470	380929	261821	286220	239115	624568	281628	300755	208166	294088	349781	247042	389797
_[Acetyl (Protein N-term)]S[Phospho (STY)]QGDSNPAAIPHAAEDIQGDDRWM[Oxidation (M)]SQHNR_.3	31252.8	NA	25102.3	25516.9	25204.9	26471.8	20885.2	29502.1	16844.9	19511.4	28856.6	32849.8	35663.5	58331.4	32024	37301.4	41665.2	39092.1	88714	45301.9	33202.2	63632.4	27213.6	51099.9	38505.2	30045.5	26103.1	31489.3	42016.5	58804.7	32908.2	43523.9	62907.6	100185	73013.6	82585.5	2641.63	16879.6	NA	NA	21326.7	31804.4	20822.3	18419	24423.7	24268.3	32663.8	27901.7	24153.2
_[Acetyl (Protein N-term)]S[Phospho (STY)]QGDSNPAAIPHAAEDIQGDDRWMSQHNR_.4	749858	87165.8	660663	459710	452616	446498	573405	506100	474703	578806	665372	697232	685539	1.11067e+06	838528	757199	925089	883828	1.4701e+06	789154	797449	1.24274e+06	582563	877734	639460	627687	656751	476890	886822	1.23335e+06	758956	780901	1.15998e+06	1.79595e+06	1323078	1.24155e+06	66409.9	499932	583409	421580	349059	816858	443819	472233	558102	541946	718396	640770	531221
_[Acetyl (Protein N-term)]S[Phospho (STY)]QGPPTGESSEPEAK_.2	NA	NA	NA	171871	NA	160431	NA	209056	156056	NA	NA	NA	237098	183661	158370	NA	NA	NA	172466	160257	150411	NA	NA	164765	NA	100597	171738	NA	NA	178313	102133	162645	95042.7	NA	111454	98326.6	20469.5	80687.4	169454	177778	128313	74420.4	NA	137025	1.0763e+06	231698	304786	249431	194561
_[Acetyl (Protein N-term)]S[Phospho (STY)]QGSPGDWAPLDPTPGPPASPNPFVHELHLSR_.4	30244.4	NA	18105.5	20389.8	26493.5	20328.4	23046.7	27130.6	22779.8	28648.7	20387.8	19115.3	28508	27281.6	26316	16474.9	36029.3	23282.2	21949	23238.4	24871.7	26887.7	17438.6	25448.6	28935.8	17678.6	40392.1	14881.4	26056.1	19985.5	16896.2	19935.2	21705.7	27539	18696.2	28404.8	NA	NA	NA	15461.4	7622.9	8915.9	10412.3	16125.2	20116.7	17056.7	30302.4	21883.3	NA
_[Acetyl (Protein N-term)]S[Phospho (STY)]QKQEEENPAEETGEEK_.2	542138	54188	411441	221471	316358	244630	430924	421662	327394	439733	493931	444601	350464	669312	459427	286869	488368	400094	944137	522078	468550	1.00106e+06	380312	574737	395552	376859	366581	274830	493321	586258	378018	456679	574448	792474	583203	578465	49437.3	265173	389782	244103	191483	478920	287927	325738	317938	360842	579973	377039	318686
_[Acetyl (Protein N-term)]S[Phospho (STY)]QTAMSETYDFLFK_.2	46576.9	NA	22449.1	NA	NA	13038.8	11540.6	30340.9	9931.75	51978.8	27022.1	4419.01	43646.5	NA	32763.7	NA	37114.5	28204.9	55145.6	11632.8	12288.2	58110.9	NA	NA	30855.9	16685.9	NA	18117.5	44354.4	19092.7	39177	21607.2	NA	22481.6	30441.2	9474.39	NA	NA	2181.54	18692.3	6027.41	NA	5221.13	20696.4	16587.8	NA	16413.2	15772.5	NA
_[Acetyl (Protein N-term)]S[Phospho (STY)]QWYELQQLDSK_.2	NA	NA	11860	NA	12871.1	10535.2	NA	15862.6	NA	13493.5	NA	NA	NA	16829.8	11481.5	NA	20165	NA	17335.9	15323.4	NA	NA	13136	12502.2	20845.9	NA	14526.1	11458.7	20600.6	12379.6	12055.7	15641.6	19995.5	19743.7	18896.6	NA	NA	NA	NA	NA	12083.8	NA	NA	NA	NA	NA	14660.9	NA	NA
_[Acetyl (Protein N-term)]S[Phospho (STY)]QYAPSPDFKR_.2	30829.9	NA	NA	NA	NA	NA	NA	NA	NA	NA	NA	NA	NA	NA	NA	NA	NA	NA	NA	NA	NA	NA	NA	NA	81706.8	NA	NA	NA	NA	NA	NA	NA	30543.9	NA	NA	NA	24205.9	73322.5	168431	81783	51139.6	123111	57454.5	73605.1	122778	107945	154376	116292	85751.3
_[Acetyl (Protein N-term)]S[Phospho (STY)]REM[Oxidation (M)]QDVDLAEVKPLVEK_.3	59778.1	NA	37773.5	46277.6	50424.1	42996.8	31379.6	31998.7	24535.1	25829.8	NA	36475.9	40740.3	45520.2	29882.6	32683.5	49890	28655.2	39607.5	29938.9	23282.9	28780.8	NA	28036.1	85938.4	53044.3	37606.3	57383.4	83339.1	65618.3	50416.1	58428.2	77076.6	81410.4	64424.4	64411.4	16376.6	35261	28222.6	37323	23902.9	45209.1	26809.5	31114.5	NA	NA	24321.6	19474.8	19401.2
_[Acetyl (Protein N-term)]S[Phospho (STY)]REMQDVDLAEVK_.2	90534.1	NA	68951.8	78657.5	41962.2	69438.4	58639.4	63071.7	48472.6	50617.1	57562.3	60318.1	53161.4	81642.7	63825.9	59167.3	47821.3	53634.5	70798.2	62520.5	42473	84073.9	NA	67846.6	124714	105479	68697.5	137435	78782.8	112890	96329	127136	140259	125299	117214	110780	20143.5	72376.6	54571.2	70473.6	35530.6	65466.4	51338.5	77152.4	41230.7	47119.4	58777	61218.8	31402.6
_[Acetyl (Protein N-term)]S[Phospho (STY)]REMQDVDLAEVKPLVEK_.3	1.07226e+06	11989.9	605156	642125	710258	405313	446277	514300	400143	564867	418711	573242	657589	453211	454698	395550	776811	490112	488957	449678	361636	349556	254740	324302	1089629	628847	583253	861675	1.19045e+06	848177	854029	783484	716972	1.06382e+06	843474	799983	116579	287799	493916	489979	230474	416699	284514	464933	258803	287707	385632	406487	203521
_[Acetyl (Protein N-term)]S[Phospho (STY)]TGGDFGNPLRK_.2	100712	NA	93887.1	109845	152616	102736	87842.4	125684	87079.7	85335.8	127052	151316	147154	173695	107704	75792.4	222907	132911	97806.1	90918.2	97527.4	99315.3	57167	106132	124450	117421	92617.7	90958.5	150112	119101	95875.2	108020	122845	156019	94999.4	113812	32009.2	83450.9	126706	85787.2	67076.3	96133	93479.3	109428	93027.3	85454	122444	108318	60466.9
_[Acetyl (Protein N-term)]S[Phospho (STY)]TVHEILC[Carbamidomethyl (C)]K_.2	NA	NA	NA	NA	18434	6407.04	NA	NA	NA	NA	NA	NA	22485.2	13936	NA	NA	22253.1	12982	NA	NA	9863.98	NA	NA	NA	15477.2	NA	NA	NA	18624.6	6696.68	8752.36	NA	NA	NA	8646.74	7999.81	8247.69	NA	12457.1	NA	6655.1	12234.3	NA	9394.04	5571.67	NA	NA	NA	12843
_[Acetyl (Protein N-term)]S[Phospho (STY)]VELEEALPVTTAEGM[Oxidation (M)]AK_.2	NA	NA	NA	NA	NA	NA	NA	NA	NA	NA	41799.8	NA	NA	90281.6	85612.1	61162.7	NA	NA	NA	85480.2	NA	NA	NA	NA	99004.4	NA	NA	NA	119014	99188.4	NA	NA	124080	101930	91840.9	133912	51845.5	70246.1	102129	67704.3	55899	NA	81435.7	79110.2	NA	NA	86546.7	50913.1	54206.8
_[Acetyl (Protein N-term)]S[Phospho (STY)]VELEEALPVTTAEGMAK_.2	161122	NA	107198	112155	173297	NA	108869	130015	NA	NA	NA	NA	224602	178304	182003	137096	246963	238654	347529	155998	139350	171208	192360	138857	237696	127085	112360	191144	295778	132420	168139	139193	307156	307255	346786	328896	239126	302452	167610	211012	164912	276190	256003	204760	183546	171366	213163	233549	218469
_[Acetyl (Protein N-term)]S[Phospho (STY)]VLGEYER_.2	16911.2	NA	NA	14577.6	28924	16180.8	32397.7	17786.7	15221.5	NA	15079.9	12227.8	30576.1	38447.6	NA	19103.2	NA	22317.2	17384.4	21290.5	17581.3	NA	12011.4	11564.2	27125.6	26776.2	13193.8	14333.7	39856.3	21616.7	NA	21581.7	59291.4	NA	40151.1	46327.6	15974.7	35745.7	38155.8	19335.5	24811.1	29926.1	13434	24214.9	37403	12070.7	20267.5	16607.6	35383.6
_[Acetyl (Protein N-term)]S[Phospho (STY)]VNYAAGLSPYADK_.2	NA	NA	NA	NA	NA	NA	NA	NA	NA	NA	NA	NA	NA	NA	NA	NA	NA	NA	NA	NA	NA	NA	NA	NA	NA	NA	NA	NA	NA	NA	NA	NA	93131.2	113461	51454.2	68197.2	NA	NA	NA	NA	NA	NA	NA	NA	NA	NA	NA	NA	NA
_[Acetyl (Protein N-term)]S[Phospho (STY)]VPAFIDISEEDQAAELR_.2	NA	NA	NA	NA	NA	NA	NA	NA	21244.9	NA	NA	NA	NA	NA	NA	NA	19911.5	13284.6	NA	NA	18381.1	12105.4	28392	NA	28221.1	NA	NA	NA	NA	21056.5	NA	NA	20672.2	32186.5	NA	NA	4472.53	22224.8	20499	NA	NA	22127.6	NA	NA	NA	NA	NA	NA	20435.7
_[Acetyl (Protein N-term)]S[Phospho (STY)]VPSALMK_.2	NA	NA	NA	NA	NA	NA	NA	NA	NA	NA	NA	NA	2171.99	2357.38	NA	NA	NA	NA	NA	NA	NA	1296.09	NA	NA	4059.36	NA	NA	NA	3593.55	NA	NA	NA	NA	NA	NA	NA	NA	NA	NA	NA	NA	NA	NA	NA	NA	NA	NA	1901.62	NA
_[Acetyl (Protein N-term)]S[Phospho (STY)]VVGLDVGSQSC[Carbamidomethyl (C)]YIAVAR_.2	NA	NA	NA	NA	28131.3	NA	NA	NA	NA	NA	NA	NA	NA	NA	NA	NA	NA	NA	NA	NA	NA	NA	NA	NA	NA	NA	NA	NA	44430.5	17612.5	15042.4	NA	41065.9	46370	31997.3	28561.2	NA	NA	NA	NA	NA	NA	NA	NA	NA	NA	NA	NA	NA
_[Acetyl (Protein N-term)]S[Phospho (STY)]WSPSLTTQTC[Carbamidomethyl (C)]GAWEMK_.2	NA	NA	NA	NA	NA	NA	47501.6	NA	NA	NA	NA	NA	NA	NA	NA	NA	NA	NA	NA	NA	NA	NA	NA	NA	NA	NA	NA	NA	NA	NA	NA	42270.1	29405.3	51769.4	NA	34095.2	NA	NA	NA	NA	NA	NA	NA	NA	NA	NA	NA	NA	NA
_[Acetyl (Protein N-term)]S[Phospho (STY)]YAEKPDEITKDEWMEK_.3	NA	NA	20613.1	15373.8	14600.1	NA	15335.4	15402	NA	NA	NA	18160.2	24988	NA	NA	NA	26467.9	29970.2	NA	18210.6	NA	27168	NA	NA	33509.3	35694.6	32351.3	25046.9	40441.9	27524	NA	NA	11751.9	38626.2	NA	NA	5474.94	16847.5	28446.7	17127.1	29271.2	26327.4	14066.2	29276.6	26504.3	19900.7	26692.3	23238.9	24728.3
_[Acetyl (Protein N-term)]S[Phospho (STY)]YDYHQNWGR_.2	NA	NA	51065	60767	70480.8	61685.8	77062.6	85090.4	NA	66369.8	60202.1	58120.6	74878.4	NA	50889.5	NA	65061	35894.7	73790.2	59756.7	NA	73347.6	43967.9	67506.2	83287	46801.9	50094.4	50777.4	75169.1	62845.7	NA	71388.8	NA	NA	74423.5	NA	NA	NA	NA	NA	NA	46040.5	NA	NA	NA	NA	56950	61852.7	NA
_[Acetyl (Protein N-term)]S[Phospho (STY)]YGPLDMYR_.2	NA	NA	8922.65	8779.47	NA	7236.99	6068.53	8787.78	NA	NA	4899.44	3882.9	NA	NA	NA	5838.71	NA	NA	9238.46	9612.81	NA	NA	4908.08	NA	NA	NA	NA	NA	9745.09	NA	7515.57	6504.3	NA	NA	6679.44	10039	NA	NA	NA	NA	NA	NA	NA	NA	NA	NA	NA	NA	6026.22
_[Acetyl (Protein N-term)]S[Phospho (STY)]YGRPPPDVEGM[Oxidation (M)]TSLK_.2	NA	NA	NA	NA	NA	NA	NA	NA	NA	NA	NA	NA	NA	NA	NA	NA	NA	NA	NA	NA	NA	NA	NA	NA	NA	NA	NA	NA	NA	NA	54720.4	NA	57396.8	75888.6	46435.9	49687.7	NA	NA	NA	NA	NA	NA	NA	NA	NA	NA	NA	NA	NA
_[Acetyl (Protein N-term)]S[Phospho (STY)]YGRPPPDVEGMTSLK_.2	284398	NA	191301	192668	320623	185624	231734	252252	210596	185188	185844	235183	310321	287832	183420	185098	378586	228521	299956	268640	239038	217465	192775	221855	394874	234529	176135	223973	546955	283151	305190	302723	453716	557086	414771	416782	68458.2	143491	249371	192570	131934	204738	170586	209762	210363	205370	271203	236861	191841
_[Acetyl (Protein N-term)]SAAGLLAPAPAQAGAPPAPEYYPEEDEELES[Phospho (STY)]AEDDER_.4	109557	NA	175048	127563	120707	78644.2	180689	187511	205637	204301	114368	76182.7	127139	58144.2	152181	122197	35292.8	76791.6	92545.6	128991	165244	147357	129282	78855.2	128478	38301.7	104775	110929	49087.7	66448.4	88593	93169.5	45303.5	20377.6	53448.4	49405.1	NA	NA	340276	176839	31537.9	NA	98948.2	159578	65574.1	142391	215096	236635	12418.9
_[Acetyl (Protein N-term)]SAAGLLAPAPAQAGAPPAPEYYPEEDEELES[Phospho (STY)]AEDDERS[Phospho (STY)]C[Carbamidomethyl (C)]R_.4	167855	52203.7	375894	318803	183843	225947	255391	369112	407233	389506	261271	140888	171000	132102	336398	281340	58551.3	182285	133095	239007	395050	225261	354016	98629.1	182467	108123	314090	283685	66962.2	117820	199654	266929	120944	47255.8	163645	113728	NA	NA	963956	541412	127782	NA	238310	490421	240510	512056	749486	491020	NA
_[Acetyl (Protein N-term)]SAEVPEAAS[Phospho (STY)]AEEQK_.2	29732.5	NA	NA	30885	NA	32284.5	31263.1	NA	27112.5	NA	NA	27785.2	NA	NA	22195.2	66301.1	NA	26051.2	NA	NA	NA	NA	30680.1	30245.8	37094.4	NA	NA	34136.3	27901.2	31433.5	NA	32192.5	NA	32058.2	31749.6	24767.8	15485.9	NA	NA	27147.3	28574.7	NA	27760.4	26702.6	NA	NA	34528.1	36303.2	NA
_[Acetyl (Protein N-term)]SAIQNLHS[Phospho (STY)]FDPFADASK_.3	4521.28	NA	NA	NA	5519.8	NA	2859.28	2904.68	1711.75	1364.3	NA	NA	3671.44	3553.06	NA	NA	NA	NA	NA	2351.89	NA	NA	NA	NA	6451.4	2401.37	1348.5	NA	6176.63	NA	NA	NA	3497.07	2264.54	1989.25	3005.02	NA	NA	NA	NA	NA	2504.01	NA	1901.44	NA	NA	NA	1665.42	NA
_[Acetyl (Protein N-term)]SAS[Phospho (STY)]APAAEGEGT[Phospho (STY)]PTQPASEK_.2	31595.9	NA	21558.2	13592.3	NA	NA	13365	NA	NA	NA	NA	NA	19423.8	21755.8	16769.4	NA	33121.8	23223.6	27436.6	NA	16146.4	NA	NA	16039.6	32413.7	31011.5	21148.1	13107.8	42239.3	29433.9	26857.1	26149.3	55138.5	84488.8	63341.6	67226	NA	5488.36	NA	NA	NA	8439.11	NA	NA	NA	NA	23797.2	NA	NA
_[Acetyl (Protein N-term)]SAS[Phospho (STY)]APAAEGEGTPTQ[Deamidation (NQ)]PASEK_.3	158225	NA	76229	98304.5	197888	133109	141748	148446	166439	114801	104840	111058	211366	139861	109978	77206.4	155805	89083.8	118588	113686	145566	125540	107808	144543	148495	138051	75196.8	99287.4	204027	115095	122386	118370	33285.8	114583	31717.2	30264.6	100708	130754	137895	150803	113796	130260	127366	145037	141292	134898	180302	143741	107643
_[Acetyl (Protein N-term)]SASAPAAEGEGT[Phospho (STY)]PTQPASEK_.2	888767	16600.6	498172	604081	1.08836e+06	668162	776125	866678	820026	605462	665169	635819	1246745	776569	638873	453142	899170	458219	742009	768801	854229	653613	582699	867076	1.00632e+06	712362	427820	634543	1148042	681299	757107	797402	563771	686687	548136	597620	348092	557853	1.01465e+06	840390	584769	630058	795392	887585	712233	759964	1.06149e+06	850122	606883
_[Acetyl (Protein N-term)]SASAPAAEGEGT[Phospho (STY)]PTQPASEKEPEMPGPR_.3	68021.7	NA	39930.6	44132.9	80009.8	72651.6	53389.4	62347.6	67192.1	50955.1	134113	79325.8	80282.5	59605.8	44587.2	43835.4	54445.2	44548.9	75203.2	58485.5	65126.8	50320.9	59656.9	125340	63261	27821	25021.9	45786.4	61915.9	55879.3	58438.7	60630.4	40939.4	37731.3	70691.5	73050.1	4778.32	22260.4	77948.8	58224.1	48432.2	54113.6	65786.2	70579.4	93451.7	85851.9	136703	85174.6	45845.2
_[Acetyl (Protein N-term)]SC[Carbamidomethyl (C)]IN[Deamidation (NQ)]LPTVLPGS[Phospho (STY)]PSK_.2	855038	31614.2	446605	664096	1.12391e+06	696313	732759	855892	443884	327878	417621	238884	688960	465216	244377	318564	442695	262019	526723	529977	549208	441088	515417	325856	871420	810558	488930	592906	537167	199837	255577	214109	293956	258069	173529	175202	246260	522167	677463	706673	719137	821821	1.02329e+06	855377	899309	919892	1.07723e+06	853900	277961
_[Acetyl (Protein N-term)]SC[Carbamidomethyl (C)]IN[Deamidation (NQ)]LPTVLPGSPS[Phospho (STY)]K_.2	1.14031e+06	37625.1	574344	870146	1.50793e+06	933399	971243	1.13288e+06	583084	428850	550869	313465	913575	616176	317987	417191	583514	341685	698150	696602	728333	584787	673481	441163	1.16193e+06	1.08566e+06	642219	780526	706974	260562	331066	281654	390143	340693	227429	230351	325727	683422	898746	932451	950951	1079174	1.34665e+06	1.11984e+06	1.1836e+06	1.20598e+06	1.40702e+06	1.12381e+06	368658
_[Acetyl (Protein N-term)]SC[Carbamidomethyl (C)]INLPTVLPGS[Phospho (STY)]PSK_.2	1.3155e+06	44604	653551	1.00758e+06	1.74412e+06	1.07113e+06	1.11944e+06	1306429	669109	492900	632761	361205	1.05514e+06	708357	363146	477190	672050	390846	803630	803041	835068	664074	777654	487899	1.37015e+06	1.24834e+06	742314	898980	815285	299500	378084	323918	447727	391037	259842	261699	376700	782917	1.0331e+06	1.07094e+06	1.092e+06	1.23817e+06	1.54602e+06	1.28613e+06	1.35958e+06	1.38413e+06	1.624e+06	1.29174e+06	424751
_[Acetyl (Protein N-term)]SC[Carbamidomethyl (C)]INLPTVLPGSPS[Phospho (STY)]K_.3	14948.2	NA	6711.45	8366.66	18241.5	14268.7	10356.8	12391.6	8224.11	6153.29	6471.53	NA	12139.2	8512.79	3156.97	4630.82	9854.88	5523.32	8653.77	7324.79	10934.9	6119.02	6212.09	4727.93	16439.1	12891.3	7052.34	7080.98	8514.57	4210.69	NA	NA	4502.72	4338.33	NA	NA	NA	8962.71	10789.1	11190.2	10068.3	13291.3	12205.1	13398	15687.9	13232.1	14463	16260.9	3670.58
_[Acetyl (Protein N-term)]SDAAVDTS[Phospho (STY)]SEITTK_.2	1.22716e+06	32141	935015	830771	1.6822e+06	1.13836e+06	1.52605e+06	1.36741e+06	1.15066e+06	970051	929764	1.0091e+06	1.51614e+06	1.04016e+06	706113	766792	1.13991e+06	718985	1.03206e+06	881762	1.30518e+06	1.01183e+06	1.05904e+06	989821	1.7123e+06	1.47134e+06	837387	887026	1.15506e+06	820388	889601	791331	679027	801203	530860	494371	766466	1.15617e+06	1752199	1.37791e+06	1.29455e+06	1.28483e+06	1.29086e+06	1.2944e+06	1.79445e+06	1.50203e+06	1.74371e+06	1.38211e+06	1.04807e+06
_[Acetyl (Protein N-term)]SDAAVDTSS[Phospho (STY)]EITTK_.2	1.38212e+06	40673	1.08059e+06	947940	1.93102e+06	1.31603e+06	1.75331e+06	1.56357e+06	1323191	1107646	1.07186e+06	1.1628e+06	1737646	1.21939e+06	819073	890216	1.31448e+06	834221	1.19337e+06	998618	1.49238e+06	1.16679e+06	1.21188e+06	1.14007e+06	1.95526e+06	1717199	967362	1.03036e+06	1328062	958731	1.04131e+06	920257	792887	933375	622723	581899	895573	1.34895e+06	2.00753e+06	1.56779e+06	1.49995e+06	1506520	1490638	1.58905e+06	2.05586e+06	1.72663e+06	1.99276e+06	1.57855e+06	1.21056e+06
_[Acetyl (Protein N-term)]SDAAVDTSSEITT[Phospho (STY)]K_.2	1.61407e+06	48524.6	1237064	1.10446e+06	2.21113e+06	1505597	2.00988e+06	1.78407e+06	1.51777e+06	1.31715e+06	1.23167e+06	1.33588e+06	1.99783e+06	1.39798e+06	949148	1.02276e+06	1.55661e+06	969376	1.40523e+06	1.14237e+06	1.67641e+06	1.34945e+06	1377547	1.31554e+06	2244973	1.96829e+06	1.12457e+06	1.17408e+06	1.54351e+06	1.13634e+06	1.1996e+06	1.06039e+06	923984	1.08751e+06	711744	681324	40286.4	1.54272e+06	2.28267e+06	1.84887e+06	1.71851e+06	1.71426e+06	1712103	1.81425e+06	2.35375e+06	1.96958e+06	2.30211e+06	1.85207e+06	1.39641e+06
_[Acetyl (Protein N-term)]SDEFSLADALPEHS[Phospho (STY)]PAK_.2	132375	NA	134698	226261	722530	480183	501084	470035	349327	287197	283457	593989	334182	188265	139923	154497	454394	258621	297664	428691	404664	348459	298632	308270	255721	799806	141646	439109	306755	177540	207818	175210	214277	365025	115192	158904	358215	108516	174148	315223	136625	306803	330291	289783	433615	376421	417271	378132	181996
_[Acetyl (Protein N-term)]SDEREVAEAATGEDASS[Phospho (STY)]PPPK_.3	NA	NA	NA	NA	123258	109783	126779	NA	NA	67111.9	NA	NA	NA	NA	NA	NA	NA	NA	NA	NA	NA	NA	NA	NA	NA	121795	114766	87033	190959	244742	NA	NA	149002	280816	91667.7	132491	NA	106263	NA	NA	NA	NA	NA	85080.8	213947	NA	NA	139779	NA
_[Acetyl (Protein N-term)]SDFVES[Phospho (STY)]EAEES[Phospho (STY)]EEEYNDEGEVVPR_.3	NA	22807.2	291389	146658	64840.6	83590.8	170302	222592	262576	215602	119940	NA	NA	NA	199865	240527	NA	NA	95267.4	153196	206625	199626	244717	73560.5	70461.9	65215	165395	217472	NA	45490.1	97454.6	116677	51504.1	NA	80309.5	61402.4	NA	NA	236349	170575	NA	NA	85540.9	154102	65553.6	236297	172394	224087	NA
_[Acetyl (Protein N-term)]SDFVESEAEES[Phospho (STY)]EEEYNDEGEVVPR_.3	42212.9	NA	31383.4	37242.8	NA	NA	42773	NA	39062.8	47459.2	55930.9	49050	36832.9	31086.2	39577.3	60223	NA	28351.8	49520.3	52036.1	34623.8	63328.1	NA	50091	NA	NA	33782.2	47791.8	NA	33917	23879.8	48040.5	29852.5	NA	44639	NA	NA	NA	46114.4	46254.7	18576.8	NA	53437.3	34723.3	37509.9	37732.8	36392.4	52380	25817.1
_[Acetyl (Protein N-term)]SDFVESEAEESEEEY[Phospho (STY)]N[Deamidation (NQ)]DEGEVVPR_.3	NA	NA	31413.1	28863.6	NA	NA	36099.8	45381.5	NA	41444.7	NA	39757.2	NA	NA	34941.9	49695.9	NA	NA	47111.9	44419.5	NA	57167.9	NA	44065.8	NA	NA	NA	44281	NA	NA	17830.7	39346	NA	NA	NA	NA	NA	NA	43240.5	45556.6	15385.3	NA	49082.2	NA	36646.2	36561.1	NA	54188.6	17698.5
_[Acetyl (Protein N-term)]SDLQAAEGPGSWS[Phospho (STY)]PTAR_.2	NA	NA	NA	NA	69216.5	NA	94019.4	NA	NA	NA	NA	NA	NA	NA	NA	NA	NA	NA	NA	NA	NA	NA	NA	NA	NA	NA	NA	NA	NA	NA	NA	NA	71807.8	NA	NA	NA	27144.5	51885.9	73719.9	71220.1	51161.1	92220.1	69925.7	73745.4	62499.6	75091.7	138125	91860.7	56859.9
_[Acetyl (Protein N-term)]SDN[Deamidation (NQ)]DDIEVES[Phospho (STY)]DEEQPR_.2	NA	NA	26287.8	17702	26406.9	25754.5	35113.7	32570.8	29623.1	27712.2	NA	37933.3	NA	38387	31721.7	NA	44968.2	NA	49151.6	NA	37188.9	52095	26132.1	37401	NA	13713	24222.1	23097.7	24490.8	52267.5	28337.9	34096.2	25149.9	26636.4	NA	NA	NA	25324.9	80893.7	63396.8	42177.3	47411.6	62845.3	71146.1	54521.6	46765.8	58022.8	53279.5	36641.7
_[Acetyl (Protein N-term)]SDNDDIEVES[Phospho (STY)]DEEQPR_.2	35193.2	NA	19582.2	13245.9	23075.6	24503.2	32539	25267.2	31502.5	21477.6	25455.3	34116.4	24612.7	33318.7	27060.9	19239.3	44186.3	25910.5	49607	25566.1	30975.9	44603.5	22325.3	34415.7	29253.8	9673.11	17584.5	20965.9	21738	44372.9	22107.5	25320.2	21734.4	22743.4	18358.2	16621.3	NA	21706.3	83117.2	60910.7	39845.5	44725.7	59830.8	71203.1	49792	47109.5	56411.3	52973.2	35372.5
_[Acetyl (Protein N-term)]SDQDHS[Phospho (STY)]MDEMTAVVK_.3	12177.9	NA	NA	5273.43	8664.57	5282.27	NA	4953.57	9428.58	NA	9136.92	9338.01	20020.4	11104.6	4189.32	NA	15045.5	NA	7848.83	6475.29	8814.68	4372.81	6459.06	NA	17146.9	7544.61	6502.97	5536.43	12234.4	9338.22	6444.63	8330.68	5228.96	NA	NA	5758.16	NA	6237.07	8466.59	7946.22	NA	6394.37	NA	8183.98	NA	5978.2	9534.11	13019.6	NA
_[Acetyl (Protein N-term)]SDSGEQNYGERES[Phospho (STY)]R_.2	37372.5	NA	32257.8	22762.7	30093	32353.5	47220.8	51591.6	39506.1	30953.3	31853.6	17107.3	40098	19443.2	27449	20284	22124.2	17080.9	53537.1	41840.8	47053.1	28472.9	28854.2	25972.7	26928.6	13490.7	14900.9	34635.1	20314.9	19117.3	27455.3	25284.5	17213.2	18045.6	21719.5	22673.8	10046.9	10046.6	47136.6	39387	23010.8	29792.5	26004.8	30958.3	22729.9	37513.1	65859.1	31422.8	21739.8
_[Acetyl (Protein N-term)]SDSGEQNYGERES[Phospho (STY)]RS[Phospho (STY)]ASR_.3	NA	9376.01	NA	NA	NA	26076.6	19401.1	NA	26968.6	NA	NA	NA	NA	NA	23255.4	NA	NA	NA	NA	NA	NA	25578	NA	NA	NA	24639.3	28488	NA	NA	15531	NA	NA	8288.11	12757.7	NA	NA	NA	NA	31310	19232.6	NA	12267.7	NA	NA	32182.6	24273.3	NA	NA	NA
_[Acetyl (Protein N-term)]SDVEENNFEGRES[Phospho (STY)]R_.2	NA	NA	NA	NA	NA	NA	NA	NA	NA	NA	NA	NA	NA	NA	NA	NA	NA	NA	NA	NA	NA	NA	NA	NA	13800.5	NA	NA	NA	8973.44	NA	NA	NA	NA	NA	14292.8	NA	NA	NA	NA	NA	5322.6	NA	NA	NA	NA	NA	NA	NA	4732.1
_[Acetyl (Protein N-term)]SEETVPEAAS[Phospho (STY)]PPPPQGQPYFDR_.3	163919	NA	NA	NA	130200	97690	NA	NA	92883	147890	NA	NA	183742	196457	108289	56891.8	136871	101945	36928.1	52947.2	119151	135442	51337.2	71436.3	125423	129528	NA	NA	63855.3	81816.1	NA	NA	157677	145105	NA	NA	528321	1.0388e+06	764292	860260	479631	619452	509524	610734	389092	415173	557335	623095	1.33817e+06
_[Acetyl (Protein N-term)]SEGES[Phospho (STY)]QTVLSSGSDPK_.2	620067	30510.6	558543	494891	598692	500788	531575	532119	525225	375522	521748	534739	653619	748143	602874	431694	706399	565569	599761	509281	586337	521182	348252	463426	666675	764733	544824	489768	591690	630878	635316	577618	423913	547867	417050	410038	260848	485656	716812	541134	435313	593512	417392	563004	536109	541754	527172	421092	463115
_[Acetyl (Protein N-term)]SEGESQTVLSSGS[Phospho (STY)]DPK_.2	30699.5	NA	19309.1	23129.6	NA	NA	27646.6	NA	NA	19905.1	21524.9	30179.9	NA	27769.7	NA	25280.6	NA	NA	NA	NA	24945.2	19895.9	NA	NA	40066.9	27049.2	46115.2	NA	35808.6	61915.8	32490.7	NA	40164.5	NA	32633.1	NA	7441.94	24425.6	25116.1	39248.3	26643.1	24017.6	NA	20779.2	32900.1	40031.9	43829.7	NA	15600.4
_[Acetyl (Protein N-term)]SES[Phospho (STY)]GHSQPGLYGIER_.2	124773	NA	91240.8	114608	118999	114860	NA	80650.2	91256.2	98787.5	92501.3	105805	60423.6	69845.7	48724.4	79375.3	131226	85369.3	27710.2	76800.8	95946.8	53149.5	66738.6	44977.4	140242	137744	96102.1	111325	106006	51354.3	51411.3	53467.9	50865.1	90451.8	60332.2	84393.1	31857.5	64889	69074.5	60845.8	67731.1	107060	69155	109722	100838	110495	88560.9	131457	83790.8
_[Acetyl (Protein N-term)]SESSSKSS[Phospho (STY)]QPLASK_.2	13295.3	NA	15642.8	7593.41	8865.89	8829.65	10666.6	12104.6	7037.53	NA	15200.7	18533.9	6576	17969.1	7792.93	NA	16620.5	15653.9	18281.2	9014.11	7422.35	14503.3	NA	9357.34	15076.3	17544.2	15387.8	7847.4	21662.2	27453.2	12946.9	18189.6	30009.6	57582.8	35521.7	28323.4	NA	NA	NA	3088.34	3317.84	5255.69	NA	NA	7374.23	4225.44	8276.26	7000.95	4215.73
_[Acetyl (Protein N-term)]SET[Phospho (STY)]APAAPAAPAPAEKT[Phospho (STY)]PVKK_.2	19790.7	NA	96286	14706.3	26626.6	32601.5	32831.6	41808.2	45012	31191.4	46211.5	15180.1	NA	NA	NA	9656.41	15088.1	11022.5	23658.1	18827.9	41276.1	30461.2	26665	23299.6	21741.8	27054.9	13160.3	15118.5	NA	NA	NA	NA	NA	9303.8	NA	NA	NA	NA	31293.1	20543.5	13281.4	18083.3	15690.4	30022.1	42522.6	38583.8	76431.5	45442.5	NA
_[Acetyl (Protein N-term)]SET[Phospho (STY)]APAETAT[Phospho (STY)]PAPVEK_.2	100011	23771.3	87926.5	87388.7	125840	97145.8	15506.5	117922	112650	103652	91340.4	145344	100843	110440	79844.5	73464.5	125670	103381	108912	23673.1	95700.1	77778.3	66097.6	96250.7	124072	169262	93815.6	76590	162774	159767	138599	126647	160770	219402	157782	174700	NA	70976.7	105785	85567.8	68522.8	80188.8	84103.1	101634	83935.5	95713.1	126203	92988.1	10324.1
_[Acetyl (Protein N-term)]SET[Phospho (STY)]APAETATPAPVEK_.2	338391	528676	281751	252984	546261	137981	20980258	205849	21637428	22720010	25989508	252685	34327788	463753	238060	171577	648723	358465	314664	250817	19868272	20500296	116722	157276	778973	560401	293902	254112	1.10457e+06	446820	416385	394112	1.15566e+06	1.40752e+06	783804	935171	117725	146027	27321424	24085316	18706766	141450	19489724	22202250	16639930	18312238	25278884	21031590	15852641
_[Acetyl (Protein N-term)]SET[Phospho (STY)]APAETATPAPVEKS[Phospho (STY)]PAK_.2	499122	227536	868703	608023	558001	770573	870414	1098874	1.33748e+06	940081	1.69125e+06	692252	500450	463879	426645	390787	363616	306983	482109	474956	992501	779107	635918	710294	690113	764561	614070	728181	275422	349697	357054	307977	175825	247070	198539	180265	24308.1	160230	1.13511e+06	599887	333093	352004	504524	766703	1.09784e+06	1.19677e+06	1.81581e+06	1.49648e+06	156666
_[Acetyl (Protein N-term)]SET[Phospho (STY)]APAETATPAPVEKS[Phospho (STY)]PAKK_.3	NA	13891.8	70468	27392.1	NA	NA	48463.4	NA	94489	74948	159868	52122.8	NA	NA	NA	NA	NA	27283.1	39195.9	NA	58100.9	48079.1	38715.9	42831.7	NA	27102.2	41168.7	NA	NA	NA	19445	NA	28146	13009.5	NA	NA	NA	NA	73906.5	NA	17936.6	17824.8	NA	NA	65664.9	70549.4	125345	107654	NA
_[Acetyl (Protein N-term)]SET[Phospho (STY)]APLAPTIPAPAEK_.2	1.03207e+06	NA	417056	442446	751494	569984	382337	423083	586506	716409	486303	652515	850724	879646	545475	461015	1.03408e+06	759355	576766	512720	546754	604792	261670	349032	1.43234e+06	940811	450279	489119	1.53765e+06	1.41514e+06	935707	823807	1.49822e+06	1.60231e+06	1.17575e+06	1.07428e+06	2.08247e+06	3.5057e+06	3288810	3.77395e+06	2336146	3.05762e+06	1.77047e+06	2.1129e+06	2.07743e+06	1.96372e+06	3.74371e+06	2443496	1.84224e+06
_[Acetyl (Protein N-term)]SETAPAAPAAPAPAEKT[Phospho (STY)]PVK_.2	9999940	148591	7.02715e+06	8746984	31052750	11875815	16978592	23383252	12608663	12023605	14445810	9022924	11389628	4640200	3334397	5250394	14164648	5330458	8224842	10568734	14937545	10058534	9487131	13141705	15413262	7.23528e+06	5338508	8080868	7310036	2419880	3202773	2.63392e+06	3.01798e+06	3.99249e+06	2.72539e+06	3583616	1.95029e+06	3635633	9096472	5815367	7.25921e+06	7122400	12140733	11835197	13530417	12511127	13136539	20794802	2.52496e+06
_[Acetyl (Protein N-term)]SETAPAAPAAPAPAEKT[Phospho (STY)]PVKK_.3	2.07485e+06	103586	1.45518e+06	1.6282e+06	5964583	2368858	4201120	3.96286e+06	2.46755e+06	2.35031e+06	2925683	1838626	2.17208e+06	801168	626778	1.00402e+06	2.45393e+06	1.31127e+06	1.1952e+06	2.22211e+06	2.59884e+06	2.04478e+06	2.10305e+06	2.25723e+06	2303484	1.36666e+06	1.08643e+06	1.62745e+06	1.12191e+06	403353	565251	487225	499114	753398	670837	573697	518470	750219	1407798	1.06056e+06	1.2148e+06	1.25997e+06	2.20115e+06	1.68706e+06	2.25239e+06	1.78058e+06	2.08299e+06	3.76661e+06	438640
_[Acetyl (Protein N-term)]SETAPAETAT[Phospho (STY)]PAPVEK_.2	868415	7991.5	546003	640678	2.07821e+06	931401	875092	1.37288e+06	984439	1.04108e+06	1.03219e+06	1.43947e+06	1.65577e+06	999802	667302	522991	2.22221e+06	878461	871491	874027	1.26571e+06	857327	795419	1.07094e+06	1342957	1.04916e+06	576128	608103	1.93033e+06	769139	938402	916776	896629	1.02836e+06	704447	733571	693877	1.15881e+06	845086	738490	877178	840896	969652	1.04571e+06	962075	890031	961201	1.11487e+06	521198
_[Acetyl (Protein N-term)]SETAPAETAT[Phospho (STY)]PAPVEKS[Phospho (STY)]PAK_.3	78803.4	34197.3	122189	112097	204657	275482	235164	321906	403861	320194	436279	275060	160141	137811	104402	95481.4	164317	131630	148625	149568	385212	259372	249995	280416	145053	213662	128475	119802	86396.7	102661	110418	83667.5	70287.7	90724.7	64333.9	60409	24157	134602	215418	144110	172131	162222	158697	224609	435627	342701	483340	417082	70786.4
_[Acetyl (Protein N-term)]SETAPAETAT[Phospho (STY)]PAPVEKS[Phospho (STY)]PAKK_.3	NA	NA	70868	NA	NA	77874.4	71133.2	90599.7	78860.1	74890.3	83481	59054.8	NA	NA	NA	NA	NA	NA	NA	50429.6	73980.2	40422	35487.4	61419.1	NA	44684.9	NA	NA	NA	NA	NA	NA	NA	NA	NA	NA	NA	28726.1	86563.6	NA	50502.2	44402.8	NA	NA	93485	71147	92537.4	65072.9	26324
_[Acetyl (Protein N-term)]SETAPAETATPAPVEKS[Phospho (STY)]PAK_.2	25764462	718000	29986498	23612490	33905916	27491416	36442996	50745736	47287604	34317380	41315160	26043510	32477860	17793608	16924088	17171530	22056964	14727185	18992156	24419624	40691068	34057916	25174956	34176432	30577920	19707712	21827502	24323800	13489298	10301407	10014223	9976134	6.32282e+06	7.92066e+06	6.43571e+06	6374497	1.45263e+06	5.54787e+06	33936732	16685003	11170641	10632358	20605356	23642178	26856746	32284464	41308824	48270732	5.45224e+06
_[Acetyl (Protein N-term)]SETAPAETATPAPVEKS[Phospho (STY)]PAKK_.3	630852	56366.6	1.57238e+06	762511	1.03398e+06	1.30752e+06	1.90752e+06	2.42411e+06	3040246	1903107	4204908	1.52239e+06	760383	434694	664192	806237	604922	537603	602512	820454	1.85136e+06	1.34384e+06	1.30659e+06	1.77328e+06	858984	459322	716264	936193	286617	248504	263969	185535	189957	198932	200558	178495	18829.9	81236.6	1.5162e+06	469663	307565	312920	632219	693863	1.48005e+06	1698715	2104487	3.02742e+06	134242
_[Acetyl (Protein N-term)]SETAPLAPTIPAPAEKT[Phospho (STY)]PVK_.2	575937	NA	190737	290464	1338430	523612	462352	591749	575905	593338	374900	500178	372814	203282	104537	172507	507050	230000	250556	346510	534681	456075	226861	357000	1.10294e+06	336218	181458	274525	294086	98683.8	122668	112017	297639	324750	89250.6	135626	458659	1.08121e+06	1.45766e+06	1.07345e+06	1.69575e+06	1.73153e+06	1899535	2.0785e+06	2.6707e+06	2256310	2.37806e+06	3.16437e+06	424837
_[Acetyl (Protein N-term)]SETAPLAPTIPAPAEKT[Phospho (STY)]PVKK_.3	198120	NA	71677.5	82173.6	418597	199522	161556	175432	191452	238046	131036	172372	120776	68854.7	31269.9	59890.5	153543	86622.3	84863.7	101734	165774	150258	93705.1	151743	349147	109127	60769.7	94515.9	95583.1	33632.8	37972.7	NA	111553	91412.5	27157.7	41554.8	167860	307679	453240	287964	524725	517526	670331	613499	763987	707932	713962	1.1207e+06	142839
_[Acetyl (Protein N-term)]SGDHLHN[Deamidation (NQ)]DS[Phospho (STY)]QIEADFR_.3	38869	NA	30661.7	25105.5	37357	27793.2	30288.5	28386.1	22505.3	30996	20818.2	32929.4	NA	34633.7	28138.2	16702.7	34420.6	24283.6	39194.4	26858.2	24487.4	38672.6	21681.1	29518.9	34363.8	22688.4	28504.8	62552.7	32756.3	27469.4	26740.2	27618	31024.5	24957.7	24587.2	30458.7	NA	22586.1	28920.2	24908	21493.9	45573.5	29864.2	40485.3	32240.4	33572.1	46641.8	40110.7	18913.6
_[Acetyl (Protein N-term)]SGDHLHNDS[Phospho (STY)]Q[Deamidation (NQ)]IEADFR_.3	619711	34530.1	492790	343245	572553	360742	375906	405098	340843	440827	393156	463149	533632	626927	346962	310197	734661	378388	589467	387334	470756	589433	308774	455403	714572	436295	391948	367594	738556	446908	433918	414587	625221	628782	461485	562445	255029	464941	621421	458364	354179	943475	636667	709693	680819	637925	809881	695757	470133
_[Acetyl (Protein N-term)]SGDHLHNDS[Phospho (STY)]QIEADFR_.3	564148	30507.2	456764	312765	525929	342350	343936	375793	319551	409558	366454	430667	497128	564632	324066	276902	669484	339364	527322	353056	439496	544640	287369	423340	653813	409492	369430	343907	662265	402204	389698	377923	571726	568228	409461	519999	228741	459765	589463	430413	334026	914150	587425	671168	636729	596568	762920	646638	460025
_[Acetyl (Protein N-term)]SGFDDPGIFYSDS[Phospho (STY)]FGGDAQADEGQAR_.3	NA	NA	58121.3	50444.9	43281.3	33619.2	47776.7	63058.9	48884.9	46047.8	44210.3	40005.4	NA	NA	31397.6	NA	NA	NA	31853.7	40593.8	93548.9	31600.7	45656.4	28824.5	47245.6	30584.4	22000.1	30894.6	NA	51491.7	49604.1	46149.3	32596.4	49098.8	42328.4	41476.3	NA	NA	NA	NA	NA	13662.7	24135.4	NA	26513	27273.8	162886	55890	NA
_[Acetyl (Protein N-term)]SGN[Deamidation (NQ)]GNAAATAEENS[Phospho (STY)]PK_.2	67172.8	NA	45113.2	42405.8	47417.5	43421.4	36260.1	49393.3	43274	36359	48811.6	50906.6	76618.4	80398.2	60814	50665.4	77161.8	58279.1	63275.2	66561.4	59704.8	44072.6	42256.5	46834.2	68015.2	52950.7	33697.3	42447.7	71613.9	53796.2	46770.5	51804	54540.7	57755.1	46136.4	45041.8	22775.2	35002.2	79948.9	69531.9	39124	48735.9	50810.3	52896.1	42619.5	42900.5	62018.2	72804.4	56477.9
_[Acetyl (Protein N-term)]SGS[Phospho (STY)]MATAEASGSDGK_.2	NA	NA	NA	NA	57884.5	38624.8	NA	NA	NA	NA	NA	NA	60129.3	36060	NA	NA	NA	NA	NA	NA	NA	NA	NA	NA	97088	NA	NA	NA	34007.6	NA	NA	NA	39079.7	NA	NA	NA	21314.9	30482.3	30171.7	48106.4	NA	53491	34798	NA	NA	63845.2	68957.7	63086.9	21433.8
_[Acetyl (Protein N-term)]SGWES[Phospho (STY)]YYK_.2	NA	NA	NA	NA	7477.71	NA	NA	NA	NA	NA	NA	NA	NA	NA	NA	NA	NA	NA	NA	NA	NA	NA	NA	NA	NA	NA	NA	NA	NA	7760.38	NA	NA	9407.13	11714.3	7236.17	NA	NA	NA	NA	NA	7480.67	7613.88	NA	NA	NA	NA	NA	NA	NA
_[Acetyl (Protein N-term)]SGYSS[Phospho (STY)]DRDR_.2	NA	NA	12758	NA	NA	NA	NA	NA	NA	NA	NA	NA	NA	NA	NA	NA	NA	NA	NA	NA	8813.28	NA	NA	6409.42	NA	NA	6282.07	NA	NA	NA	NA	5451.77	5796.1	NA	NA	8337.51	12618.8	7715.26	NA	NA	20555.8	6285.27	28058.3	14570	19409.1	7552.01	NA	17612.9	15029.7
_[Acetyl (Protein N-term)]SKS[Phospho (STY)]ES[Phospho (STY)]PKEPEQ[Deamidation (NQ)]LR_.2	148576	69324.4	140921	104916	92787.8	94985.7	113326	126997	125994	116199	157941	102102	107283	109890	85504.7	69217.1	80900.9	65833.1	97431.5	77079.6	106837	74096.3	62524.7	77361.9	152246	161463	101153	117533	88786.1	77466.8	110097	109899	63537.1	84152.8	58375.1	65945.8	NA	58099	177905	134572	60125.6	73611.7	72980	96744.8	92215.9	82432.5	161040	83945.1	57698.4
_[Acetyl (Protein N-term)]SKS[Phospho (STY)]ES[Phospho (STY)]PKEPEQLR_.2	273110	139245	260396	200098	170878	179078	214022	239173	243553	212741	287956	192754	198796	206271	159644	144342	152134	122848	190127	142588	200781	140348	122962	151589	279794	303583	194571	223525	167681	157460	209330	211000	122452	166738	121254	130874	13159.7	114154	320875	254296	123788	147732	145098	197785	183316	161504	303863	163995	119704
_[Acetyl (Protein N-term)]SLDIQS[Phospho (STY)]LDIQC[Carbamidomethyl (C)]EELSDAR_.2	816104	NA	739914	558824	810067	573112	635236	656224	594305	588283	464268	438275	757811	730218	686080	683904	640964	395723	873751	596718	611088	788938	569590	459871	891149	547156	562021	695694	935540	608517	605498	635528	1.05356e+06	786377	791663	716692	221779	799522	675658	762568	590947	938784	720870	488113	468387	630008	720303	645349	931503
_[Acetyl (Protein N-term)]SLLDGLASS[Phospho (STY)]PR_.2	16962.9	NA	7695.23	8214.53	14955	10267.2	9682.13	13777.2	14161.1	13208.1	11168.6	9656.69	16314.4	12275	8865.86	8068.05	21392	9678.16	9665.98	11519.8	11211.7	8522.44	11677.5	8890.86	15364.5	11233.7	6697.67	9794.84	15629	10751.9	10870.6	12195.9	14486	12114.9	7158.51	10180.7	7864.84	12260.1	24382.4	20550.3	13825.9	17178.7	19346.4	20534.5	15507.7	16552	29594.3	20718.2	15893.3
_[Acetyl (Protein N-term)]SLLDGLASS[Phospho (STY)]PRAPLQSSK_.3	NA	NA	NA	NA	NA	NA	NA	NA	NA	NA	NA	4509.67	NA	NA	NA	NA	NA	NA	NA	NA	NA	NA	NA	NA	NA	NA	NA	NA	NA	NA	NA	NA	NA	NA	NA	NA	NA	NA	NA	3502.08	NA	NA	3156.26	NA	4222.35	NA	NA	5373.42	NA
_[Acetyl (Protein N-term)]SLQ[Deamidation (NQ)]Y[Phospho (STY)]GAEETPLAGSYGAADSFPK_.3	96028.2	NA	15042.9	69368.7	91356.8	67685.1	62859.5	85169.8	69390.6	29620.3	73816.2	77865	125798	122836	96785.8	18890.7	150153	94237.5	28697.8	86054.7	72757.8	79791.9	77366.6	78433.5	104184	80428.4	61253.6	17936.7	40502.7	39794.9	67565	29719.5	32033.9	77679	58353.7	68614.8	39325.1	17728.6	93370.3	82596.3	80474.4	23324	25708.6	68731.9	74649.6	72349.3	91520.6	73994.4	100043
_[Acetyl (Protein N-term)]SLQ[Deamidation (NQ)]YGAEETPLAGS[Phospho (STY)]YGAADSFPK_.3	NA	NA	NA	131496	NA	117820	NA	NA	NA	NA	132009	141225	NA	221151	NA	NA	NA	NA	143056	NA	126109	139434	NA	145841	175989	NA	102407	128866	NA	NA	121524	NA	139396	NA	104052	114051	NA	NA	NA	NA	NA	NA	NA	NA	143282	129900	160730	137970	NA
_[Acetyl (Protein N-term)]SLQYGAEETPLAGS[Phospho (STY)]YGAADSFPK_.3	119369	NA	77174.2	100354	119395	84882.3	82647.7	100617	97413.7	87673.2	106708	112762	166716	173372	131418	124975	198784	122044	118560	119714	98834.8	110057	96286.2	112422	131248	108023	79623.8	93313.6	166596	103399	94135.2	94125.2	105511	107968	83676	85010.5	53588.1	102376	115203	112659	111681	110943	105393	90653.4	105411	92814.9	125265	99088.4	138582
_[Acetyl (Protein N-term)]SLYPS[Phospho (STY)]LEDLK_.2	27941.9	NA	12549.5	15544.9	27019.1	12219.4	16694	20046.9	11760.9	12095.4	8690.82	12719.3	11630.2	9119.68	7944.49	NA	18815.2	8972.13	10802.9	13029.8	8339.67	7718.71	8735.13	6307	21563.4	11503	12323.2	15832.6	39865.3	15256.9	22289.6	25399.4	23747.1	16106.4	13687.2	21554.9	7740.23	9387.16	15749.6	12797	17558.9	17635.8	14218.2	12164	12810.8	12990.2	17190.4	10538.4	9040.98
_[Acetyl (Protein N-term)]SNRPNNNPGGS[Phospho (STY)]LRR_.3	NA	NA	NA	NA	NA	NA	NA	NA	NA	NA	NA	NA	NA	NA	NA	NA	NA	NA	NA	NA	NA	NA	NA	NA	NA	NA	NA	NA	NA	NA	NA	NA	NA	NA	NA	NA	NA	NA	NA	NA	NA	NA	NA	NA	NA	NA	NA	NA	NA
_[Acetyl (Protein N-term)]SNYVNDMWPGS[Phospho (STY)]PQEK_.2	NA	NA	NA	NA	51441.9	34915.6	NA	51246	NA	NA	29404.1	NA	NA	NA	NA	NA	NA	NA	37773.4	NA	NA	38546.4	36709.9	37524.5	NA	NA	NA	NA	53706.9	41396.1	45313	NA	33279.1	44752.7	NA	NA	6802.78	16122.4	NA	NA	22898.8	31983	33132.7	32437.5	NA	NA	NA	NA	NA
_[Acetyl (Protein N-term)]SQGDS[Phospho (STY)]NPAAIPHAAEDIQGDDRWMSQHNR_.4	829192	101131	736349	518618	496787	509403	647858	567375	532562	651544	744406	776887	756728	1.21539e+06	912273	855543	1.01793e+06	973097	1.6281e+06	871810	883132	1.37312e+06	652541	966536	705279	700575	733905	532291	992406	1362860	850190	866349	1.27355e+06	1.98726e+06	1.4595e+06	1.39813e+06	74477.8	551726	669376	472573	391514	863997	495284	529290	633099	605041	802661	711244	589869
_[Acetyl (Protein N-term)]SQYAPS[Phospho (STY)]PDFKR_.2	66527.7	NA	NA	NA	86315.1	51836.5	NA	NA	53370.2	48612.3	NA	NA	NA	51894.3	NA	NA	75302.1	67469.4	NA	NA	96558.9	NA	NA	NA	84138.4	35684.7	NA	NA	67909	NA	NA	NA	112384	75639.7	NA	NA	189753	288841	352576	270480	383420	381049	399758	393221	418644	371763	434167	371577	264003
_[Acetyl (Protein N-term)]SS[Phospho (STY)]LSEYAFR_.2	NA	NA	NA	NA	NA	NA	NA	3021.28	NA	NA	NA	NA	NA	NA	5443.16	NA	NA	NA	NA	NA	NA	NA	NA	NA	NA	NA	NA	NA	NA	6144.82	NA	NA	5162.19	7322.4	NA	NA	NA	NA	NA	NA	NA	NA	NA	NA	NA	NA	NA	NA	3563.33
_[Acetyl (Protein N-term)]SS[Phospho (STY)]PASTPSR_.2	NA	NA	31022.9	NA	11967.4	23972.9	NA	26504.8	15117.3	NA	NA	30214.9	NA	NA	NA	NA	NA	NA	NA	NA	31743	NA	NA	29872	NA	NA	NA	NA	12881.2	NA	NA	NA	16509.1	NA	NA	NA	NA	NA	NA	NA	47402.4	22059.9	52767.9	41922.1	NA	29799	22962.6	71527	NA
_[Acetyl (Protein N-term)]SS[Phospho (STY)]PPEGKLETK_.2	346918	6315.62	294233	221143	369072	428219	529260	617685	389154	260824	564513	316947	367335	341148	312310	185816	309631	308304	312586	282245	510580	384871	189466	339377	281010	189761	195928	164141	113182	113521	112341	130965	213589	198974	207640	177915	44442.3	215531	619437	384549	296092	287873	343606	382566	453943	468327	447213	378974	146144
_[Acetyl (Protein N-term)]SSDASQ[Deamidation (NQ)]GVITT[Phospho (STY)]PPPPSMPHK_.2	152400	NA	NA	96471	182790	NA	102717	97821.1	NA	97852.2	NA	NA	196214	NA	138664	NA	174041	NA	NA	NA	112292	NA	63613.9	107705	138735	NA	74096.1	61355.1	103410	NA	39224.5	NA	81887.4	117916	68698.8	102733	NA	NA	NA	NA	NA	NA	NA	NA	NA	NA	NA	NA	NA
_[Acetyl (Protein N-term)]SSDASQGVITT[Phospho (STY)]PPPPSM[Oxidation (M)]PHK_.3	NA	NA	NA	NA	NA	NA	NA	NA	NA	NA	NA	NA	NA	NA	NA	NA	NA	NA	NA	NA	NA	NA	NA	NA	NA	NA	NA	NA	NA	NA	NA	NA	NA	47380.4	NA	NA	NA	NA	NA	NA	NA	NA	NA	NA	NA	NA	NA	NA	NA
_[Acetyl (Protein N-term)]SSDASQGVITT[Phospho (STY)]PPPPSMPHK_.3	137156	NA	117310	103568	158544	95688.2	116899	138326	96633.9	108251	107700	115535	189226	141107	140935	96262.6	156711	101419	89069.5	93895.7	126432	105026	83095.5	122382	113365	NA	101768	80961.2	94020.7	NA	62306.4	79570.6	97798.7	NA	77983	105420	NA	NA	NA	NA	NA	NA	61924	NA	NA	NA	NA	99491.6	NA
_[Acetyl (Protein N-term)]SSEPPPPPQ[Deamidation (NQ)]PPTHQASVGLLDTPRS[Phospho (STY)]R_.3	908086	NA	672380	767877	1.06503e+06	707214	684950	800996	795935	655364	742355	677254	1.34912e+06	1.08433e+06	879531	910667	1.43111e+06	870381	926171	1.07545e+06	1.16833e+06	776756	825679	1.03373e+06	1.25344e+06	902349	639335	769788	1.14605e+06	751204	878988	842359	671994	630940	481186	594670	409305	1.12556e+06	1.50999e+06	1.03568e+06	870200	1.1233e+06	1.07725e+06	1.17799e+06	1.12836e+06	1.22705e+06	1.35166e+06	1.27893e+06	954898
_[Acetyl (Protein N-term)]SSEPPPPPQPPTHQASVGLLDTPRS[Phospho (STY)]R_.3	628037	NA	452649	538367	744731	502583	483996	574774	538854	447424	508407	478414	923014	757857	597634	630674	993769	597148	640278	739320	806058	535797	573824	726187	849854	620681	453097	542202	799449	511592	604695	587509	455374	428434	333597	411086	294998	793617	1.02712e+06	707648	617256	788516	769740	831873	771461	845905	913067	892461	669437
_[Acetyl (Protein N-term)]SSILPFT[Phospho (STY)]PPIVK_.2	NA	NA	NA	NA	NA	NA	NA	NA	8835.5	NA	NA	NA	NA	NA	NA	NA	7577.21	NA	NA	NA	NA	NA	NA	NA	NA	NA	NA	NA	NA	NA	NA	NA	NA	NA	NA	NA	NA	NA	21540.5	NA	NA	NA	NA	NA	NA	8939.79	NA	NA	20553
_[Acetyl (Protein N-term)]SSILPFT[Phospho (STY)]PPVVK_.2	257020	NA	70053.2	52968.7	176833	143631	141025	231685	53524.2	174367	165227	87101.9	176076	23968.9	92709.8	27843.4	305096	98819.5	144286	104791	44696.7	129494	25803.6	90923.8	127000	NA	62426.4	120450	460528	64370	97560.3	NA	42115.7	58269.4	113104	102286	72246	64887.8	47880.3	248764	184881	NA	295259	241331	172474	46874.3	221285	355935	37242.2
_[Acetyl (Protein N-term)]SSILPFT[Phospho (STY)]PPVVKR_.2	NA	NA	NA	NA	NA	NA	NA	NA	NA	NA	NA	8432.41	NA	NA	NA	NA	30992.2	NA	NA	NA	NA	NA	NA	NA	NA	NA	NA	NA	NA	NA	NA	NA	NA	NA	NA	NA	NA	NA	NA	NA	NA	NA	NA	NA	NA	NA	NA	10993.8	NA
_[Acetyl (Protein N-term)]SSMNPEY[Phospho (STY)]DYLFK_.2	20841.4	NA	NA	NA	NA	NA	NA	NA	NA	NA	NA	NA	32137.5	NA	21240.1	15737.8	NA	NA	NA	12667.2	NA	11052.5	14608.6	11317.4	15208.2	NA	NA	NA	NA	NA	9699.42	NA	NA	NA	NA	NA	NA	NA	NA	8024.25	NA	NA	NA	NA	NA	NA	NA	NA	NA
_[Acetyl (Protein N-term)]SSPTTSSLDTPLPGNGPPQPGAPSSS[Phospho (STY)]PTVK_.3	207661	32015.7	NA	171217	207314	111471	NA	139255	39032.7	NA	NA	173847	NA	53890	NA	166021	52347.2	NA	NA	161119	NA	NA	NA	166885	222084	51243.1	29640.9	155377	268021	186259	57749	180945	217184	54870.8	167024	53036.2	NA	308160	NA	NA	NA	89224.6	201032	177227	NA	136445	161871	NA	NA
_[Acetyl (Protein N-term)]SSS[Phospho (STY)]PVN[Deamidation (NQ)]VKK_.2	NA	NA	12089.7	5441.91	NA	12336.1	9357.42	11117.7	13030.9	NA	13539.4	10265.8	44270.7	11182.3	7876.5	4007.7	NA	6266.8	12567	9486.84	15908	7825.58	NA	12048.7	65563.2	9051.49	8881.56	NA	8764.82	11454.5	10954.6	15248.2	NA	9610.14	7322.8	NA	NA	8072.83	NA	11258.5	12264.7	12960.2	332498	15813.8	20090.7	15794.8	15771.5	24836.7	15045.1
_[Acetyl (Protein N-term)]SSS[Phospho (STY)]PVNVKK_.2	188733	41415.3	689207	274889	177833	610298	488289	591802	600060	16450.7	768560	642744	145140	611428	323734	17993.3	479954	358868	455595	384530	832409	561868	17191.9	766587	212531	635672	601154	477202	429679	730549	469304	743329	630938	479868	429148	419666	304896	480627	180125	556317	950629	743419	1.07151e+06	825075	1804958	879839	847550	1.39865e+06	1.07069e+06
_[Acetyl (Protein N-term)]SSSSSS[Phospho (STY)]PRETYEEDREYESQAK_.3	73118	NA	80536.1	74557.6	102185	76655.6	98030.9	98425.4	89346	70240.2	89949.6	60217	126898	133498	105297	91420.2	166955	97107.7	107661	98040.4	116962	148303	93756.7	122056	72812.8	72378.3	72270.5	67369.8	70356.6	57515.9	41250.7	65916.3	37927.4	60039.6	37495.6	44034.3	3459.81	27625.6	48105.7	46507.9	43139.9	44872.5	45136.1	70616.8	65269.7	43393.4	57984.9	62288.2	33341.3
_[Acetyl (Protein N-term)]ST[Phospho (STY)]GGDFGNPLR_.2	26784.4	NA	23801.9	26032.5	41973.8	27040.1	28177	27253.3	26071	29378.3	28346.4	24178.5	39101.1	36341.2	31698.4	22747.3	35883	26643.2	24088.9	30093.1	28557.6	21478.5	19904.4	21372.7	31766.7	26191.1	17106.1	31588.5	34344.4	23421.9	32719.6	34322.4	33192.8	32884.1	36742.6	31457.9	28334.9	30117	41157.5	33757.4	26106	39598.1	24504.3	33512.4	22255.1	22951.8	33993.2	23623.2	24209.3
_[Acetyl (Protein N-term)]ST[Phospho (STY)]GGDFGNPLRK_.2	100712	NA	93887.1	109845	153156	102736	87842.4	125684	87079.7	85335.8	127052	151316	147154	173695	107704	75792.4	222907	132911	97806	90918.2	97527.4	99315.3	57167	105561	124450	116705	92617.7	90958.6	150112	119101	95875.2	108020	122845	156019	94999.4	113812	32009.2	83450.9	127401	85787.2	67076.3	96133	93479.3	109428	93027.3	85454	122474	108318	60466.9
_[Acetyl (Protein N-term)]ST[Phospho (STY)]LYVSPHPDAFPSLR_.2	NA	NA	NA	NA	NA	NA	NA	NA	NA	NA	NA	NA	NA	NA	NA	NA	NA	NA	NA	NA	NA	NA	NA	NA	NA	NA	NA	NA	NA	NA	NA	NA	43063.6	45185.3	33089.9	31868.9	NA	NA	NA	NA	NA	NA	NA	NA	NA	NA	NA	NA	NA
_[Acetyl (Protein N-term)]ST[Phospho (STY)]PDPPLGGTPR_.2	214471	NA	125887	132416	195921	123114	136949	164236	124932	97638.7	119060	116752	250847	153241	145948	92793.7	209842	116179	140669	150376	156121	113417	87771.7	131315	248777	123863	87401.2	135788	207407	97236.9	129284	119737	131560	110632	96680.8	136768	58701.6	95385.8	180259	123726	103645	130767	138316	176318	NA	122397	157232	174376	105988
_[Acetyl (Protein N-term)]STDTGVS[Phospho (STY)]LPSYEEDQGSK_.2	24953.7	NA	21526	NA	16578.5	21382.4	NA	NA	NA	NA	NA	NA	NA	16697.5	NA	NA	24750.3	NA	18232.9	NA	NA	25970.9	NA	NA	28388.9	25926.3	22248	NA	41955	15601.9	NA	NA	14555.4	22494.7	12471.2	NA	5227.39	15953.8	NA	NA	13706.8	15689.2	NA	NA	NA	NA	NA	NA	19801.9
_[Acetyl (Protein N-term)]STLYVSPHPDAFPS[Phospho (STY)]LR_.2	NA	NA	NA	NA	NA	NA	NA	NA	NA	NA	NA	NA	NA	NA	NA	NA	NA	NA	NA	NA	NA	NA	NA	NA	NA	NA	NA	NA	24398	NA	NA	NA	39844.9	37712.6	29330.1	42937.9	NA	NA	NA	NA	NA	NA	NA	NA	NA	NA	NA	NA	NA
_[Acetyl (Protein N-term)]STVHEILC[Carbamidomethyl (C)]KLS[Phospho (STY)]LEGDHSTPPSAYGSVK_.4	105693	NA	NA	49050.8	105738	78461.7	55307.3	59176.8	39164.1	40752.5	NA	NA	153279	100775	60601.1	47319	156226	90451.7	62814.7	58863.5	NA	65934	44608.1	45452.8	99996.7	NA	44654.4	NA	117017	110081	54775.6	54172.7	82134.9	168548	NA	56140.2	NA	NA	322909	NA	54780.7	NA	NA	NA	NA	NA	NA	NA	230614
_[Acetyl (Protein N-term)]SVNYAAGLS[Phospho (STY)]PYADK_.2	NA	NA	NA	NA	NA	NA	27250.1	NA	NA	NA	NA	NA	NA	NA	NA	NA	30385.4	NA	NA	NA	NA	NA	NA	NA	30017.2	NA	NA	19261.3	35094.5	NA	NA	NA	34180.2	NA	NA	NA	14716.8	NA	NA	NA	27493.5	34775.5	NA	NA	NA	30167.6	27481.8	31715.7	NA
_[Acetyl (Protein N-term)]SVQSSSGSLEGPPSWSQLSTS[Phospho (STY)]PTPGSAAAAR_.3	NA	NA	NA	NA	NA	23061.8	NA	NA	NA	NA	NA	NA	NA	48977.8	NA	NA	NA	NA	33604	NA	34114.1	NA	NA	NA	NA	NA	NA	NA	23750.5	NA	17739.8	18064.5	NA	NA	NA	37749.7	2274.8	NA	NA	NA	11156.3	24442.5	NA	28096	31011.5	22212.9	NA	NA	NA
_[Acetyl (Protein N-term)]SWLSSS[Phospho (STY)]QGVVLTAYHPSGK_.3	NA	NA	NA	NA	6104.29	NA	NA	NA	NA	NA	NA	NA	NA	12243.9	10312.1	NA	NA	NA	NA	NA	NA	NA	NA	NA	NA	NA	NA	NA	6642.54	NA	NA	NA	6369.09	NA	NA	5854.46	NA	NA	NA	NA	NA	4406.48	NA	NA	6491.09	NA	NA	NA	NA
_[Acetyl (Protein N-term)]SWS[Phospho (STY)]PSLTTQTC[Carbamidomethyl (C)]GAWEMK_.2	NA	NA	NA	NA	NA	NA	NA	NA	NA	NA	NA	NA	NA	NA	NA	NA	NA	NA	NA	NA	NA	NA	NA	NA	NA	NA	NA	NA	NA	NA	NA	NA	47401.2	NA	55021.5	48779.2	NA	23368.8	NA	NA	NA	NA	NA	NA	NA	NA	NA	NA	NA
_[Acetyl (Protein N-term)]T[Phospho (STY)]EC[Carbamidomethyl (C)]FLPPTSSPSEHR_.3	NA	NA	NA	NA	NA	NA	NA	NA	NA	NA	NA	NA	NA	NA	NA	NA	NA	NA	NA	NA	NA	NA	NA	NA	NA	NA	NA	NA	NA	NA	NA	NA	NA	NA	NA	NA	NA	NA	15406	NA	4554.02	11753.1	NA	NA	NA	NA	NA	NA	NA
_[Acetyl (Protein N-term)]T[Phospho (STY)]EWETAAPAVAETPDIK_.2	NA	NA	NA	NA	NA	NA	NA	NA	NA	NA	NA	NA	NA	NA	NA	NA	NA	NA	NA	NA	NA	NA	NA	NA	NA	NA	NA	NA	NA	NA	NA	NA	31250.6	26256.7	16038.5	NA	NA	NA	NA	NA	NA	NA	NA	NA	NA	NA	NA	NA	NA
_[Acetyl (Protein N-term)]T[Phospho (STY)]NQYGILFK_.2	NA	NA	NA	NA	NA	NA	NA	NA	NA	NA	NA	NA	NA	NA	NA	NA	NA	NA	NA	NA	NA	NA	NA	NA	NA	NA	NA	NA	NA	NA	NA	NA	1947.93	2506.93	1257.2	1477.08	NA	NA	NA	NA	NA	NA	NA	NA	NA	NA	NA	NA	NA
_[Acetyl (Protein N-term)]TEC[Carbamidomethyl (C)]FLPPTSS[Phospho (STY)]PSEHR_.2	629431	NA	383844	473942	801349	437983	497089	570214	460957	322486	440433	475824	606875	617496	353637	307390	995103	456025	505756	539157	499016	364725	334655	348477	757347	642942	391054	418323	831401	466730	45064.9	507916	450572	441044	333872	324470	348481	576309	573631	542079	504306	731641	603700	598887	418587	427022	519446	449744	502618
_[Acetyl (Protein N-term)]TEC[Carbamidomethyl (C)]FLPPTSS[Phospho (STY)]PSEHRR_.3	395035	NA	300798	283862	586276	307235	336173	369970	342636	265023	323089	314621	407642	362691	221457	175804	609306	287486	317450	355759	349797	263142	224187	265092	493707	352092	242103	276675	500065	275158	301837	307618	274793	204233	181037	176751	186008	315710	409366	350446	339048	417837	434973	466190	313791	321714	371604	431778	359534
_[Acetyl (Protein N-term)]TEC[Carbamidomethyl (C)]FLPPTSSPS[Phospho (STY)]EHRR_.3	416065	NA	313854	303755	627885	322145	345077	374456	346010	266793	319372	324501	421218	395721	222281	186938	645895	291758	318180	354492	367836	268231	254905	268235	491674	353825	259365	285404	498917	296042	341107	309724	303192	195912	180176	181447	181636	327638	434013	374188	373852	417100	463444	463691	348247	334281	393365	431348	364215
_[Acetyl (Protein N-term)]TEEVDFLGQDSDGGS[Phospho (STY)]EEVVLTPAELIER_.3	91313.9	NA	9140.74	166903	164182	124409	140620	199662	NA	17462.7	92628.9	175266	21453.7	47737.9	22912.4	84756.9	NA	NA	39870.4	110763	NA	11268.7	80276.9	239228	17186.7	NA	160668	122907	9907.29	NA	23389.7	16357.5	40754	NA	53500.2	57622.6	NA	NA	NA	90956.7	33483.2	27286.5	161729	18232	52034.4	161016	204216	152984	NA
_[Acetyl (Protein N-term)]TELASSGGGS[Phospho (STY)]PAGDGEEGLGDER_.3	NA	NA	NA	NA	NA	NA	NA	NA	NA	NA	NA	NA	NA	NA	NA	NA	NA	NA	NA	NA	10904.5	10185.7	9455.21	NA	NA	11841	8386.17	NA	NA	NA	9904	10496.8	18019.5	16053.9	NA	NA	5146.95	18859	19921.1	17743.1	20263.7	24926.5	15062.8	20468.9	25960.1	14352.6	20645.6	17802.8	24845.3
_[Acetyl (Protein N-term)]TEPGAS[Phospho (STY)]PEDPWVK_.2	29815.5	NA	NA	NA	33642.5	26010	NA	37918.9	45017.5	37955.1	37831.1	35029.9	35621.5	NA	NA	NA	72653.5	37371.1	NA	35104.4	NA	31626.8	21054.3	41400.1	39737.3	35349.9	25233.8	NA	62192.5	29600.5	42058.6	32344.5	34966.7	47851.5	NA	NA	10573.2	24465.1	NA	38120	22405.5	29947.7	NA	42567.1	24919.6	NA	47138.7	43005.6	31001.1
_[Acetyl (Protein N-term)]TEQMTLRGT[Phospho (STY)]LK_.2	NA	NA	NA	NA	37153.5	NA	NA	NA	NA	NA	NA	NA	NA	NA	NA	NA	32031.4	NA	NA	NA	NA	NA	NA	NA	25421.1	11713.5	NA	NA	46337	16616.4	13507.8	13723.5	62088.4	120998	44322.5	52694.6	NA	NA	NA	NA	NA	NA	NA	NA	NA	NA	NA	NA	NA
_[Acetyl (Protein N-term)]TEWETAAPAVAET[Phospho (STY)]PDIK_.2	49457	NA	39356.4	55127.5	82911.9	44769.4	54506.6	52854.9	40655.1	41327.8	55922.7	49631.8	52640.3	46528.3	41767.8	NA	66078.6	50593.4	38619.7	46346.8	43552.4	33825.8	45654.5	45165.4	67007.3	53191.6	36770.6	46857.3	104393	51904.5	58186.9	52056	112698	133943	91629.3	99807.1	10391.2	NA	NA	34157.3	41458.7	36620.7	42399.6	38934.5	38179.3	33553.2	47914.4	48839.4	38017.4
_[Acetyl (Protein N-term)]TS[Phospho (STY)]PS[Phospho (STY)]SSPVFR_.2	43880.1	20250.7	45221.5	45858.7	39427.7	47390.4	43031.8	37460.8	59337.2	37949.2	77578.1	31137.4	32236.6	38008.1	38019.1	37413.8	29506.2	29533.9	47976.8	38739.3	45175.8	27024	37853.9	NA	38635.1	59758.1	33365.1	43099.9	32046.6	NA	36365.5	31440.8	27939.1	27282.1	26904.9	NA	40829.5	36631.8	83483.4	63220.4	56086	62701.4	42328.2	49374.2	64873.3	66263.9	105061	50324.4	34896.6
_[Acetyl (Protein N-term)]TS[Phospho (STY)]PSSS[Phospho (STY)]PVFR_.2	43521	20250.7	45221.5	45858.7	39427.6	47390.4	43773.5	37460.8	59337.2	34366.3	77578.1	31137.4	32236.6	42213.5	38019.1	37413.8	30269.5	29533.9	47976.8	38739.3	45747.7	27024	37853.9	26064.4	38635.1	59758.1	33365.1	43099.9	32046.5	NA	36365.5	31440.8	27939.1	27282.1	26904.7	NA	27998.6	36631.8	83483.4	63220.4	56086	62400.8	42328.2	49374.2	64873.3	66263.9	105061	50324.4	34896.6
_[Acetyl (Protein N-term)]TS[Phospho (STY)]PSSSPVFR_.2	46578.2	NA	30585.3	31603.4	45215.2	28636.5	32719.7	35310.7	38212.7	24723.8	37475.2	33772.4	47920.7	58947.4	46428	29000.5	60776.9	37562	35842.8	36194.3	36543.1	28555.8	19172.8	29087.8	39321.3	33623.8	23839.7	24369.1	34069.4	25602.7	31165	22405	30814.8	34412.3	18626.7	16712.8	54699.8	37673.4	66560.5	47704.2	31727.6	39343.4	27270	35151.1	37970	36186.4	47656.7	35518	32009.2
_[Acetyl (Protein N-term)]TSPC[Carbamidomethyl (C)]SPPLKPPIS[Phospho (STY)]PPK_.3	32264.5	NA	NA	15904.5	43012.2	14781.2	15680.9	18709.3	NA	11935.1	NA	14719.5	41574.4	31911.1	14083.4	11996.6	54947.6	16795.5	14540.2	17047.8	18724.8	13073.4	NA	13128.7	49865.1	31360.5	15222.7	NA	37070.7	17832.2	13352	12784.1	12390.4	NA	NA	NA	15035.8	24379.3	21124.2	21934.2	16099	23872	17540.9	19110.9	16945.6	8601.69	14541.7	12769.8	25056.1
_[Acetyl (Protein N-term)]TSPSSS[Phospho (STY)]PVFR_.2	NA	NA	NA	NA	NA	NA	NA	NA	NA	NA	NA	NA	NA	8188.99	NA	NA	NA	NA	NA	NA	NA	NA	NA	NA	NA	NA	NA	NA	NA	NA	NA	NA	NA	NA	NA	NA	6314.97	NA	NA	NA	NA	NA	NA	NA	17180.4	NA	NA	NA	9135.14
_[Acetyl (Protein N-term)]TT[Phospho (STY)]S[Phospho (STY)]QKHRDFVAEPMGEK_.3	NA	NA	NA	NA	NA	NA	NA	NA	NA	NA	24456.7	42926	NA	38257.1	9280.42	15429.5	61735.7	46112.5	NA	NA	NA	31618.6	NA	18793.1	NA	56275.1	44145.8	16402.8	16008.6	40094.4	NA	NA	NA	55591.8	NA	NA	NA	NA	27186.8	NA	NA	NA	NA	NA	45811	NA	19480.6	NA	NA
_[Acetyl (Protein N-term)]TTES[Phospho (STY)]GS[Phospho (STY)]DSESKPDQEAEPQEAAGAQGR_.3	435924	282362	378307	354780	366101	416515	411738	499575	460131	423687	596398	438845	797557	748398	644650	566149	677484	769796	707380	644404	745468	543158	513526	514240	479086	435030	397742	372089	390766	475423	479485	519530	445143	627938	496878	487374	17967.6	201224	742864	642534	411712	463754	434133	633880	545844	557784	891865	442232	414414
_[Acetyl (Protein N-term)]TTESGS[Phospho (STY)]DSESKPDQEAEPQEAAGAQGR_.3	375818	80417.4	388317	371819	439914	410820	433579	548212	404000	287502	478773	349605	785038	1.0395e+06	720392	586627	923876	877310	1078285	908854	539655	494882	469499	540759	309300	616650	315258	453142	616266	614299	687897	776066	904544	1221614	1.04729e+06	1.03824e+06	135933	218712	187851	303971	185532	261861	298031	279343	152864	160635	318987	173386	263154
_[Acetyl (Protein N-term)]TTSGALFPS[Phospho (STY)]LVPGSR_.2	NA	NA	NA	NA	NA	NA	NA	NA	NA	NA	NA	NA	NA	NA	NA	NA	NA	NA	NA	NA	NA	NA	NA	NA	NA	NA	NA	NA	NA	NA	NA	NA	NA	NA	11102.9	NA	NA	NA	NA	NA	NA	NA	NA	NA	NA	NA	NA	NA	NA
_[Acetyl (Protein N-term)]VDYSVWDHIEVS[Phospho (STY)]DDEDETHPNIDTASLFR_.4	NA	NA	91315.4	62000.5	30114.6	20553.8	52342.8	57713.2	26680.1	117112	NA	42585	NA	NA	71225.4	53541.7	NA	17124.6	NA	46247	26882.1	60659.5	45910	26821.4	23121.3	NA	40102.5	74836.2	NA	NA	24856.2	NA	16838.3	NA	NA	27691	NA	NA	34109	44490.3	18189.3	NA	43460	NA	NA	NA	42007.6	86686.8	NA
_AAAAAAAATMALAAPSS[Phospho (STY)]PTPESPTMLTK_.3	52111.8	NA	32236.3	43319.5	55572.9	51267.1	46412.6	56899	37588.7	39754.5	32336.7	70640.1	51119	NA	32248.5	31693.7	NA	NA	35452.2	48113.6	39023.6	34789	38666	50262.1	67916.9	68261.7	27265.2	36017.3	NA	NA	NA	NA	NA	NA	NA	NA	6307.66	22239.3	56213.1	46322.3	28945.9	40479.1	35269.1	32240.9	43361.1	44229.1	55158.5	54203.9	25257.6
_AAAAAAAGDS[Phospho (STY)]DS[Phospho (STY)]WDADAFSVEDPVR_.3	73632.6	NA	60472.7	64154.6	120937	57264.8	74294.9	73633.5	69165.1	75557.8	69345.2	50897.8	NA	79034.8	63514.9	76684.2	101805	NA	64513	74545.6	69564.5	55342.4	99105.2	66560.7	113803	54979.5	49746.5	69747.9	66996.9	95815.7	74512.4	63771.3	66725.9	63898.6	60068.2	64692.6	NA	48067	109375	83120.2	62757.1	69596.9	82217	69479.7	62893.3	84338.9	89177.8	75017.5	74713
_AAAAAAAGDS[Phospho (STY)]DS[Phospho (STY)]WDADAFSVEDPVRK_.3	79879.5	NA	85228	108448	NA	84767.5	113881	136360	93341.7	117464	108738	104126	127326	119603	115671	124763	164760	117027	110717	NA	NA	109165	114919	118065	NA	NA	107278	97357	133753	83976.6	95026	110569	83609.7	112036	67805.6	87608.2	NA	94099.3	129517	135772	130760	123360	114746	114677	140894	89821.9	117845	NA	145089
_AAAAAALS[Phospho (STY)]GAGTPPAGGGAGGGGAGGGGS[Phospho (STY)]PPGGWAVAR_.4	NA	NA	NA	NA	NA	NA	NA	NA	NA	34656.8	NA	NA	NA	NA	NA	NA	NA	NA	NA	NA	NA	NA	17974.1	18303.6	NA	NA	NA	NA	NA	NA	NA	NA	21959.1	NA	NA	NA	7721.71	NA	NA	NA	18125.8	NA	NA	54494.7	NA	NA	NA	15154.7	NA
_AAAAAATAPPS[Phospho (STY)]PGPAQ[Deamidation (NQ)]PGPR_.2	184311	NA	132496	126697	240009	148754	187914	243702	161747	150302	189786	170330	238621	149694	115803	85950.2	242830	123311	143607	165079	162671	140146	123891	192328	195101	136927	91331.7	123076	141461	78565.5	110455	104908	89632	132707	93992.2	110363	27625.4	52532.3	130239	91100.2	70454	86344.3	104912	115383	119921	117861	161876	194278	65826.3
_AAAAAATAPPS[Phospho (STY)]PGPAQPGPR_.2	234537	NA	163256	163448	313800	195092	237011	313975	211473	191022	246211	221971	307633	188463	147591	109184	314267	154620	190464	219806	206259	181598	161368	244002	250634	178357	117509	156247	185182	101200	141229	135701	118482	169295	119329	143150	34578.7	67533.8	162584	119292	91081.5	110451	139813	151852	157909	155333	208087	254296	80975.9
_AAAAALSGS[Phospho (STY)]PPQTEKPTHYR_.3	NA	NA	NA	NA	91286.2	NA	NA	NA	NA	NA	NA	NA	NA	NA	NA	NA	136291	NA	NA	NA	NA	NA	NA	NA	NA	NA	NA	NA	NA	NA	NA	NA	NA	NA	NA	NA	21819.4	NA	NA	NA	NA	NA	74686.9	NA	NA	NA	110704	NA	NA
_AAAAALSGSPPQT[Phospho (STY)]EKPTHYR_.3	84569.3	NA	NA	NA	96034.9	NA	NA	NA	NA	NA	NA	NA	100606	NA	NA	NA	98705.4	NA	NA	NA	NA	NA	NA	NA	NA	NA	NA	NA	93821.4	NA	NA	NA	NA	NA	NA	NA	16863.7	NA	NA	NA	NA	NA	63372.7	NA	NA	NA	102101	NA	NA
_AAAAAWEEPSS[Phospho (STY)]GN[Deamidation (NQ)]GTAR_.2	136756	NA	119747	128067	169259	125333	140861	134925	120619	96636.3	NA	102343	137191	114726	99604.6	NA	118176	83582.1	122872	95173.6	118659	97311.1	97884.3	110449	157990	108590	93025.4	111423	100096	99844.1	94249.3	102066	86717.2	91525.7	79296.5	NA	24100.6	74042.8	150507	104727	77772.6	96648.1	106899	140402	107661	116753	133633	137741	87748.3
_AAAAGLGHPAS[Phospho (STY)]PGGS[Phospho (STY)]EDGPPGS[Phospho (STY)]EEEDAAR_.3	805081	1.1035e+06	943404	779262	580998	820397	819137	954034	1.22919e+06	970963	1.03772e+06	766812	697205	717622	690311	600140	621267	590440	630133	560516	965898	664603	609120	618765	914948	272750	790790	751771	539966	715186	803206	733429	434699	408035	412500	469064	NA	89656	1.91194e+06	1.23141e+06	494790	419064	770192	1.36904e+06	1.2477e+06	1.28245e+06	2103633	1.64083e+06	234214
_AAAAGLGHPAS[Phospho (STY)]PGGS[Phospho (STY)]EDGPPGSEEEDAAR_.3	604406	359974	607620	502701	442536	627867	565306	679500	834302	691617	695346	602749	510460	551209	449243	422587	484460	510476	470428	422749	681570	464096	395778	419274	658450	538207	652251	516424	446621	656233	658090	615706	345112	508846	361789	383530	NA	246911	1.11266e+06	778072	374455	425867	522857	921434	742400	692062	1.36797e+06	863524	323750
_AAAAGLGHPAS[Phospho (STY)]PGGSEDGPPGS[Phospho (STY)]EEEDAAR_.3	703068	318267	726940	636640	550247	621828	572985	644392	727478	568238	594269	431222	688312	714297	638835	519816	503541	464077	590013	488912	700474	526221	429338	438785	770945	673153	575806	622543	484340	545960	575488	542911	444100	543657	394410	350735	NA	694579	1.25703e+06	1.0818e+06	782977	873545	814262	943989	908392	932038	1.29817e+06	854547	690189
_AAAAGLGHPAS[Phospho (STY)]PGGSEDGPPGSEEEDAAR_.3	744820	34287.4	525844	491913	705196	461739	552798	570790	613590	534234	515234	533880	790520	608828	474378	417280	682186	458757	497952	520158	558764	426039	362798	453610	825829	551752	416278	518346	731803	559941	493277	544020	410919	456982	379862	351012	162689	489122	892381	669529	502268	616113	684782	752300	566954	545838	680036	730825	455550
_AAAASAAEAGIATTGTEDS[Phospho (STY)]DDALLK_.3	36824.3	NA	22167.8	25755.5	46528.1	30118	26945.5	30508.7	22876.8	27040.3	29357.5	19169.1	56614.5	39226.5	26061.2	28947.3	52710.9	33013.4	30378.7	35742.4	26345	26710.6	26646.5	28787.9	51077.8	31638.5	17480.9	26695.4	41598.5	25906.7	26065.5	24533	36012.6	47337.2	32300.3	36114.7	8013.1	20468.5	34294.7	35633.7	20988.5	26526.6	20873.2	24117.1	53953	35148.6	24654.2	37568	26634.5
_AAAGS[Phospho (STY)]PRS[Phospho (STY)]PGPLPGAR_.3	20377.7	NA	10277.1	12479.7	16910.3	27993.8	19587.7	20866.4	48543.4	29615.8	42338.4	32173.8	26781.2	25397.2	18311.9	12983	29970.9	21422.4	17689.2	19793.2	27765.9	25965.1	15543.5	28548.7	33180.7	26270.7	10226.9	11358.1	NA	20437.2	15790.5	12454.9	25475.2	29796.9	13292.1	13624.3	NA	23612.6	84991.3	46263.5	35953.7	39470	41235.3	75519	80448.4	58082.3	103569	82559	31052.3
_AAALQALQ[Deamidation (NQ)]AQAPTS[Phospho (STY)]PPPPPPPLK_.3	752464	14556.1	478149	488390	767054	460801	516263	611438	446685	435829	439125	730639	977447	799857	646284	518542	1.13788e+06	666925	668877	674204	563447	553555	386091	511968	875512	566202	449025	496315	702262	580928	612341	607194	541685	733070	398444	547274	235568	479670	823925	667776	560982	632781	535896	643645	621977	545292	645245	604745	848192
_AAALQALQAQ[Deamidation (NQ)]APTS[Phospho (STY)]PPPPPPPLK_.3	752464	14556.2	478149	488293	767054	460801	516263	611438	446685	435829	439125	730639	977447	799857	646284	518542	1.13788e+06	666925	668877	674204	563447	552934	386091	511968	875512	566202	449025	496315	702262	580928	613329	607194	541685	733070	398444	547274	235568	479670	823016	667776	560982	632781	535896	643534	621977	545292	645245	604745	848192
_AAALQALQAQAPTS[Phospho (STY)]PPPPPPPLK_.3	761836	15269.5	478832	488824	767180	465078	515982	612413	446879	436680	439951	730716	979706	802116	649218	520228	1.14314e+06	666925	668324	675482	563474	554942	386549	513425	878721	566689	449105	496315	705107	581429	614516	606776	543960	733325	398466	547402	236675	480336	823016	667477	558146	631506	536885	643534	619306	541974	645245	602873	848296
_AAALS[Phospho (STY)]LSTLASPK_.2	NA	NA	NA	NA	NA	NA	NA	NA	NA	NA	NA	NA	NA	NA	NA	NA	NA	NA	NA	NA	NA	NA	NA	NA	NA	NA	NA	NA	NA	NA	NA	NA	NA	NA	NA	NA	NA	NA	NA	NA	NA	5604.2	NA	NA	9592.25	NA	NA	NA	NA
_AAAPGTLEPDAAAATPAAPS[Phospho (STY)]PASLPLAPGC[Carbamidomethyl (C)]ALR_.3	37505.6	NA	NA	59253.5	50539.5	NA	NA	33272.7	NA	NA	NA	NA	51813.5	66969.4	NA	NA	95967.1	NA	NA	NA	55314.2	NA	NA	NA	47998.8	NA	NA	NA	48074	NA	NA	NA	NA	NA	NA	NA	13099.1	17859.1	NA	29989.9	NA	32829.1	42210.7	38137.1	NA	33475.2	NA	58728	35162.9
_AAARLS[Phospho (STY)]LTDPLVAER_.3	69636.8	NA	9864.65	16511.4	17746.8	5208.62	7158.96	NA	3672.98	NA	3169.05	9983.81	11783.2	NA	3345.49	NA	NA	NA	NA	NA	NA	NA	NA	NA	91875.8	15318.9	12654.5	20255	21562.9	12044.5	10910.9	8070.87	5747.8	10804.5	6712.65	8215.18	9216.29	18900.2	14946.1	8836.04	12566.2	9254.78	4821.71	NA	7205.28	NA	NA	NA	NA
_AAATGN[Deamidation (NQ)]AS[Phospho (STY)]PGKLEHSK_.3	33813.5	NA	22009.7	22814.8	30928.8	26830.5	26391.6	37534	23972.5	14531.6	15237.7	19528.5	31823.4	26335.4	12688.7	NA	23306.8	16025.7	15196.8	24268.9	21246.2	NA	NA	23459.1	32206.4	23342.9	17941.7	19621.5	22889.3	16074.7	17199.2	18424.4	NA	NA	NA	7857.18	10511.8	10994.7	23434.9	17967.1	NA	16708.7	22446.2	20956.5	NA	26481.8	32011.8	31031.5	12078.5
_AAATGNAS[Phospho (STY)]PGKLEHSK_.3	60326.4	9250.73	45393.6	42053.8	63703.7	49746.7	45714.3	63066.4	58593.8	30289.4	35235.4	39014.8	62864	47270.5	29429.1	20048.2	45357.5	34138	40853.5	46490.9	47676.2	42051.1	17823.9	49372.8	59146	50987.5	35347.8	41377.3	43444.8	40531.6	32773.3	42719.7	31866.8	36628	22820.5	26691.9	15928.4	24632.2	50124.7	42575.8	41239.3	34880.3	46141	49757.1	53538.7	52629.2	71072	59131.6	42224.8
_AAATPES[Phospho (STY)]QEPQAK_.2	NA	NA	NA	NA	NA	NA	NA	NA	NA	NA	NA	NA	NA	NA	NA	NA	NA	NA	NA	NA	NA	NA	NA	NA	NA	NA	NA	NA	10870.5	7732.16	14508	NA	NA	NA	NA	NA	NA	NA	NA	NA	NA	NA	NA	NA	NA	NA	NA	NA	NA
_AAAVAAPLAAGGEEAAAT[Phospho (STY)]TSVPGS[Phospho (STY)]PGLPGRR_.3	NA	NA	233331	267950	459665	240953	268164	301704	266438	259970	272806	315490	300863	338376	234694	191342	422936	268500	188638	261762	206450	247775	165115	239719	492286	305532	219541	227266	NA	NA	118364	122135	223651	227013	126314	145476	230993	428107	NA	574756	547845	529687	565169	555861	574562	NA	519572	612589	388575
_AAAYDIS[Phospho (STY)]EDEED_.2	99908.3	NA	94725.3	101845	116049	93814.5	107391	111590	111530	102225	93601.9	110963	110925	90814.2	122213	116868	92147.3	95894.8	102771	117273	156049	123181	96005.9	90476.4	110812	33046.5	88001.2	104178	81243.8	83892.8	99986.5	111014	92921.2	44695.2	87442.1	85128.8	NA	24396.5	214287	133311	86222.9	46343.8	128336	170554	84208.6	158188	148340	135368	82099.2
_AADEDWDS[Phospho (STY)]ELEDDLLGEDLLSGK_.3	NA	NA	NA	NA	NA	NA	NA	NA	60962.9	NA	NA	NA	NA	NA	NA	NA	NA	NA	NA	NA	NA	NA	NA	NA	101671	NA	NA	NA	NA	NA	NA	NA	NA	NA	NA	NA	NA	NA	NA	NA	NA	NA	NA	62879.8	NA	NA	NA	NA	NA
_AADIS[Phospho (STY)]LDNLVEGK_.2	NA	NA	NA	NA	24802	NA	15233	20464.7	NA	NA	NA	NA	22470.9	NA	NA	NA	NA	NA	NA	NA	NA	NA	NA	9170.29	NA	NA	NA	NA	NA	NA	NA	NA	NA	NA	NA	NA	NA	NA	NA	NA	7106.98	8519.98	NA	NA	16049.1	13321.1	14775.9	NA	NA
_AADPPAENSS[Phospho (STY)]APEAEQGGAE_.2	376401	29408.8	376639	371782	321951	337427	396247	447321	431468	261349	385960	291168	380440	427567	348074	255615	273224	251282	353566	341411	406948	314337	275719	348623	326406	481916	306440	386407	286461	240083	288941	303801	239594	235733	265422	247261	90528.2	231531	348818	364730	245982	272883	285750	309081	384783	330829	492281	314392	227084
_AADPVPSFDESS[Phospho (STY)]QDTSEK_.2	127290	4917.35	117245	109110	183656	161000	165640	192066	245944	125642	192239	136694	115457	90061.7	59914.1	59195.1	115057	66109.6	97755	118802	195492	116969	115871	132544	138609	169897	110770	132423	29502	88404.5	105547	90220.2	32473.3	37484.2	31398.4	28647.6	18273.1	NA	115628	85602	94820.1	103201	114734	142633	179470	148873	151675	179426	31753.3
_AADRLPNLSS[Phospho (STY)]PSAEGPPGPPSGPAPR_.3	420648	NA	315852	290896	259468	191609	238034	260999	165725	184142	173037	212008	650148	783373	770113	533782	378142	181013	202250	196132	261290	306522	195495	392280	329149	160107	209763	167806	148776	125388	148157	155081	358949	362172	290841	393964	182263	242176	309689	225806	155912	159933	163727	166589	158596	168847	180391	213890	337827
_AADS[Phospho (STY)]DDGAVSAPAASDGGVSK_.2	430903	11394.8	322882	279874	376608	275994	293737	341483	459129	245998	318783	253991	475238	426510	247287	187223	350088	184078	274801	253345	434629	312668	216045	317218	440526	395827	205381	265222	290944	242349	234799	250529	167683	163237	128797	132826	139244	302401	781083	536784	338633	366598	420530	520102	578173	560867	729570	471582	326513
_AADS[Phospho (STY)]EPESEVFEITDFTTASEWER_.3	NA	NA	35161.2	NA	NA	NA	NA	NA	NA	68443.2	NA	NA	91076.9	NA	51088.7	NA	NA	NA	73994.2	NA	40309.4	45166.3	NA	NA	NA	NA	NA	47919.8	NA	NA	NA	63727.3	NA	NA	NA	NA	NA	NA	NA	NA	NA	NA	NA	NA	NA	NA	NA	NA	NA
_AADSQNSGEGNTGAAESSFS[Phospho (STY)]QEVSR_.3	NA	NA	NA	NA	39292.6	75029.2	41672.8	62971.9	49622.7	50342.6	NA	77390.1	NA	60144.2	NA	41476.9	NA	49417.9	58200.3	45079.5	51859.8	NA	43160.3	51098.9	NA	38275.7	NA	NA	58342.7	55200.9	61632.9	57911.7	57868.9	38588.7	72114.1	58512	9041.92	24407.3	NA	NA	33147.6	40393.3	46532.1	28230.8	49780.7	57566.1	45501.5	46909.8	29142.7
_AADSSDS[Phospho (STY)]DGAEESPAEPGAPR_.2	18050.2	NA	NA	NA	NA	NA	NA	NA	NA	NA	NA	NA	13216.6	NA	NA	NA	17936.8	NA	19033.5	9315.01	NA	NA	NA	NA	NA	NA	NA	NA	NA	17620.5	NA	NA	11911	28073.2	NA	11469.8	NA	NA	NA	NA	NA	NA	9238.45	NA	NA	NA	12222.9	NA	7534.78
_AADTEEM[Oxidation (M)]DIEMDS[Phospho (STY)]GDEA_.2	NA	NA	NA	NA	NA	NA	NA	NA	NA	NA	NA	NA	NA	NA	NA	NA	NA	NA	NA	NA	NA	NA	NA	NA	NA	NA	NA	NA	NA	NA	NA	NA	NA	NA	NA	NA	NA	NA	NA	NA	NA	NA	NA	NA	NA	NA	NA	NA	NA
_AADTEEMDIEM[Oxidation (M)]DS[Phospho (STY)]GDEA_.2	22085.6	NA	20054.5	18130.1	29000.8	NA	NA	NA	NA	NA	NA	19725.3	NA	NA	NA	NA	NA	NA	NA	18823.6	NA	25091.3	NA	NA	NA	NA	NA	19317.1	NA	21483.3	NA	21070.7	NA	NA	NA	NA	NA	NA	24249.6	22610.7	15715.6	6909.83	14139	17297.4	15810.3	NA	NA	NA	13686.7
_AADTEEMDIEMDS[Phospho (STY)]GDEA_.2	61548.5	NA	53364.5	46870.3	NA	42671.1	43136	59359.7	83786.6	48656	79958	52913.2	NA	24610.8	43349.6	68080.6	NA	NA	61325.2	52006.4	51616.7	60587.1	76928.2	56165.5	NA	NA	44239.3	64299.5	24900.6	48352.5	50818.2	68752	33646.1	NA	49683.3	23257.5	NA	31101.7	90203.5	85851.4	55075.2	25354.1	70136.5	52446.2	69134.3	64882.6	79855.1	60341.2	46108.6
_AADVSVTHRPPLS[Phospho (STY)]PK_.3	12351.6	NA	NA	NA	NA	4515.79	7346.81	8618.24	NA	NA	NA	NA	NA	NA	NA	NA	NA	NA	NA	2780.71	NA	NA	NA	NA	NA	NA	NA	NA	7275.89	NA	NA	NA	NA	NA	NA	NA	NA	NA	5769.19	NA	NA	NA	NA	NA	NA	NA	NA	NA	NA
_AAEDMPEAEQDLERPPT[Phospho (STY)]PAGGRPDS[Phospho (STY)]PGLQAPAGQQR_.4	NA	NA	NA	NA	NA	NA	NA	NA	NA	NA	NA	NA	NA	NA	NA	NA	NA	NA	NA	NA	NA	18843.3	NA	NA	NA	16686	NA	NA	NA	NA	NA	NA	NA	15768.2	NA	NA	10951.6	55428.2	102033	112121	79839.2	95683.8	98804.4	137682	130917	131138	156616	140372	68584.1
_AAEDSTAQEN[Deamidation (NQ)]PTPWLSTAPTEPS[Phospho (STY)]PPESPQILAPTK_.4	40705.1	NA	20828.3	19919.6	36232.6	15310.8	15338.8	18318.2	18894.8	14437.6	13069.2	14478.3	68240	51759.8	32221.9	27767.8	70934.4	42001.6	34745.9	38693.5	28566.3	20664.6	24855.1	14324.1	66526.2	44733.7	30130.6	29353	44023.2	38854.4	20572.2	23746.8	24223.4	22197.7	10692	NA	13989.1	34447.4	52828.4	53112.7	36640.4	43360.6	47341.2	50603.7	41065.8	31999.4	32392.9	29156.5	43198.5
_AAEDSTAQENPTPWLSTAPTEPS[Phospho (STY)]PPES[Phospho (STY)]PQILAPTK_.4	35052.1	15689.1	20396.1	36332.6	32695.6	35466.2	26399.1	38404.9	31313.4	29249.5	30354.5	NA	44298	56086.2	40568	42618.1	50329.8	32734.4	34809.3	29349.3	42435.1	41869.4	38451.4	30939	30667.6	25217.8	21384.8	26362.9	29417.6	22744.9	19756.6	NA	28113.8	30702.1	22697.7	NA	NA	20998.4	42065.8	36070.3	25609.4	27231.8	29115.3	36824.7	33429.9	34312.9	66241	40374.2	32857.6
_AAEDSTAQENPTPWLSTAPTEPS[Phospho (STY)]PPESPQILAPTK_.4	42590.8	NA	22893.6	23260.7	37035.5	20036.3	16191.8	19421.6	19846.6	16759.1	13224.4	17318.6	67837.8	55497	34739.8	31696.9	71229.7	45802.5	36475.9	40657.9	30407.7	23964.3	25893.3	16500.3	69295.8	49180.6	34404.3	32312.9	46024.2	41602.5	23551	26801.9	27656.9	24161.5	11734.3	NA	16523	39244.4	54098.2	55083.5	40559.1	50584.2	50791.2	51936.8	47400.7	36488.6	31721.9	30431	47091.2
_AAEDSTAQENPTPWLSTAPTEPSPPES[Phospho (STY)]PQILAPTK_.4	36344	NA	NA	NA	31950.8	NA	NA	NA	NA	NA	NA	NA	62836.8	NA	28429.3	25960.5	66656.1	33446.1	30417.6	36881.3	NA	13908.1	NA	NA	59094.3	38553.4	26857.4	29327	NA	NA	NA	NA	13602.5	17934.4	10696.7	11537.6	12731.2	31036.8	48901.9	47328.4	34288.9	38238.3	41069.1	46098.7	38785	29637.5	NA	NA	NA
_AAES[Phospho (STY)]LADPTEYENLFPGLK_.3	NA	NA	NA	NA	NA	NA	NA	NA	NA	NA	NA	NA	NA	NA	NA	NA	NA	NA	NA	NA	NA	NA	NA	NA	NA	NA	NA	NA	NA	NA	NA	NA	NA	NA	NA	11498.5	NA	NA	NA	NA	NA	NA	NA	NA	NA	NA	NA	NA	NA
_AAESETPGKS[Phospho (STY)]PEK_.2	NA	5060.61	63693.8	NA	1705.69	3543.54	4627.78	3984.25	5422.73	NA	3078.75	9782.22	NA	NA	NA	NA	NA	NA	4208.93	NA	21121.3	6227.13	NA	11701.6	NA	4837.02	28307.9	10571.3	NA	5707.19	2878.56	13555	13336.4	20199.1	3858.79	19811.3	37469.3	5566.09	NA	NA	60685.9	9601.66	88850.3	32483.3	41142.9	8609.91	NA	24624.8	24106.8
_AAESLTAIPEPAS[Phospho (STY)]PQ[Deamidation (NQ)]LLETPIHASQIQK_.3	466983	NA	265831	323790	539192	309090	374068	449230	381511	395106	268412	368810	446757	363056	384096	261760	476970	205588	225704	285628	217704	322129	280429	385140	529492	240410	237968	266740	360659	179221	216342	224770	170410	160101	158374	176343	117993	155353	236090	215553	163293	154976	202176	234576	238036	212455	259720	362988	164941
_AAESLTAIPEPAS[Phospho (STY)]PQLLETPIHASQIQK_.3	347182	23113.8	209312	267451	405211	257546	288374	340651	300776	309665	220885	285664	352310	299695	298569	198450	370562	171706	173632	209639	170227	258799	218640	306894	407410	200842	185081	206907	289694	151985	171782	187286	137900	143945	127182	142589	91569.1	127041	193053	175352	137644	121693	166077	178354	188934	174321	211324	267769	132777
_AAEVLNKHS[Phospho (STY)]LSGRPLK_.3	NA	NA	NA	NA	NA	NA	NA	NA	NA	NA	NA	NA	NA	NA	NA	NA	NA	NA	NA	NA	NA	NA	NA	NA	NA	NA	NA	NA	NA	NA	NA	NA	68939.6	70561.7	NA	NA	NA	NA	NA	NA	NA	NA	NA	NA	NA	NA	NA	NA	NA
_AAFDDAIAELDTLS[Phospho (STY)]EESYK_.2	354463	NA	166648	202940	307729	134571	185122	229745	118467	153073	179944	242306	289851	199428	187349	198172	388554	224037	188267	215258	163628	97385.2	154036	135788	294895	79523.8	174323	188704	564259	238083	288514	309597	493696	419199	523488	567653	1759.29	72997.9	230774	164190	131351	124804	152632	135363	125561	122806	188202	151907	118458
_AAFGISDS[Phospho (STY)]YVDGSSFDPQR_.2	NA	NA	NA	NA	NA	NA	NA	NA	NA	NA	NA	NA	NA	NA	NA	NA	NA	NA	NA	NA	NA	56312.8	NA	NA	NA	NA	NA	NA	NA	43914.3	NA	NA	NA	NA	NA	NA	NA	NA	NA	NA	NA	NA	NA	NA	NA	NA	NA	NA	NA
_AAFTTPDHAPLS[Phospho (STY)]PQSSVASSGSEQTEEQGSSR_.3	119815	22153.2	95749.8	82568.1	122029	87827.9	100890	106584	105492	111634	92606.2	100641	143065	146727	114261	116063	157397	82141.8	99959.7	76406.5	92980.6	100172	100552	129058	135807	123021	81608.7	84497.5	98062.6	86914.7	97865.6	93319.7	76305.5	96738.8	65751.1	67434.5	63443.8	142997	156249	138360	134451	141159	160981	141455	125746	129820	142015	139873	166428
_AAGAGEDADWLEGGS[Phospho (STY)]PVSGQ[Deamidation (NQ)]LLAGVQVQK_.3	77022.7	NA	42321.5	54102.2	69116.8	52455.7	53240.2	67733.8	69889.5	63516.5	51832.7	56461.5	87941.1	63729.7	50397.6	54311.7	74120	44234.7	45026.2	55993.3	55691.3	55626.4	62576.9	59010.2	80052.3	56078.1	40764.8	47388	57288.6	49376.6	40655.2	44837.2	48170.1	36168.8	29968.5	33458.7	19060.3	61339	103916	83193.1	63811.2	79785.1	114733	86026.3	86218	87059.3	108152	90585.5	65856
_AAGAGEDADWLEGGS[Phospho (STY)]PVSGQLLAGVQVQK_.3	72329.5	NA	41040.6	50966.1	66310.7	49148	50203.1	62079.4	65277.5	58319.8	48147.9	50461.8	83111.3	60079.3	47832.4	46906.4	68279.3	42384.3	43063.5	52795.1	51835.6	52878.5	59261.2	58283.9	74334.1	54412.7	40335.6	45405.2	54253.6	46696.5	39007.3	43285.8	46401.9	34574.6	28595.6	32633.3	17959.3	57732.6	100445	77539.4	60348.9	75153.3	106391	80594.2	80461.5	78177.1	97743.3	86841.7	63728.8
_AAGALGSASSGS[Phospho (STY)]M[Oxidation (M)]PNLAAR_.2	NA	NA	NA	NA	NA	NA	NA	NA	NA	NA	NA	NA	NA	NA	NA	NA	NA	NA	NA	NA	NA	NA	NA	NA	NA	NA	NA	NA	NA	NA	NA	NA	NA	NA	NA	NA	5959.86	NA	NA	NA	NA	NA	NA	NA	NA	NA	NA	NA	NA
_AAGALGSASSGS[Phospho (STY)]MPNLAAR_.2	NA	NA	NA	NA	NA	NA	NA	NA	NA	NA	NA	NA	NA	NA	NA	NA	NA	NA	NA	NA	NA	NA	NA	NA	NA	NA	NA	NA	36596.5	NA	NA	NA	NA	NA	NA	NA	NA	NA	NA	NA	NA	NA	NA	NA	NA	NA	NA	NA	NA
_AAGARPLTS[Phospho (STY)]PESLSR_.3	90663	NA	44930.9	48708.5	98237.8	53972	60298.5	69061.9	46240.3	28901.6	32441	56972.7	84004.5	65514.3	NA	NA	96036.3	50205	NA	39583.5	NA	46802.7	34525.6	59233.3	91905.1	66304.6	48166.8	48826.9	71920	NA	NA	NA	NA	NA	NA	NA	NA	NA	NA	NA	NA	NA	NA	NA	NA	NA	19855.3	NA	NA
_AAGDTTVIENSDVS[Phospho (STY)]PETESSEK_.3	NA	NA	NA	NA	118294	89924.3	NA	NA	NA	NA	NA	75118	NA	67003.4	NA	69738.8	76533.8	NA	53305	NA	58075.8	NA	NA	58943.3	NA	51289.1	62419.4	NA	60373.2	52182.6	NA	NA	NA	88296.6	NA	87114.6	13360.7	35837.9	NA	48904.5	NA	NA	NA	NA	NA	NA	NA	39962.8	50844.1
_AAGFERPS[Phospho (STY)]PVQLK_.3	NA	NA	NA	NA	NA	NA	NA	NA	NA	NA	NA	NA	NA	NA	NA	NA	NA	NA	3135.58	NA	NA	NA	NA	NA	NA	NA	NA	NA	9601.22	NA	NA	NA	10817.9	11886.5	6277.34	NA	NA	NA	NA	NA	NA	NA	NA	NA	NA	NA	NA	NA	NA
_AAGGAPS[Phospho (STY)]PPPPVR_.2	1.0518e+06	16433.2	658775	615048	1.60804e+06	633981	637848	951758	814599	489740	687008	744278	1.29651e+06	917148	622535	487211	1.71164e+06	721264	629140	779778	854870	514209	433152	628588	1.37415e+06	848695	553445	622727	1.43208e+06	629294	669423	706074	641010	692728	391542	495339	585172	780127	1.54323e+06	1.10477e+06	762825	923771	1.09756e+06	1.09826e+06	1.06065e+06	1.02261e+06	1.15336e+06	1.25499e+06	769344
_AAGGAPS[Phospho (STY)]PPPPVRR_.2	73056.6	NA	41581.8	NA	67300.8	29171.3	39927.1	50773.7	35327.6	33376	51834.2	63590.3	68826.4	55074.1	46416.8	28858.7	75690.4	37847.8	42105.6	39820.9	35910.3	33965.2	17925.1	34231.6	55531	43383.8	36074.5	27622.4	64678.2	33521.9	29130.9	32035.1	24331.1	28060.5	NA	17036.4	15051.8	30916	71871.9	50239.3	43133.3	37980.9	60748.9	53549.6	61882.9	47616.8	74623.8	60128.2	41760.5
_AAGGGGGGGGGGGGGGGGGGVGGGGAGGGAGGGRS[Phospho (STY)]PVR_.3	NA	NA	NA	NA	NA	NA	NA	NA	NA	NA	NA	NA	3812.34	NA	NA	NA	NA	NA	NA	NA	NA	NA	NA	NA	NA	NA	NA	NA	NA	NA	NA	NA	NA	NA	NA	NA	1213.79	NA	NA	NA	2175.38	2651.52	1578.81	2869.23	3081.58	4262.26	5682.76	4014.33	NA
_AAGISLIVPGKS[Phospho (STY)]PTR_.3	NA	NA	NA	NA	NA	NA	NA	NA	NA	NA	NA	NA	NA	NA	NA	NA	NA	NA	NA	NA	NA	NA	NA	NA	10218	NA	NA	NA	NA	NA	NA	NA	NA	NA	NA	NA	9521.55	9852.43	12696.9	10099.2	10837.5	13119.3	14422.7	14021.1	13836.4	14776.2	18133.8	14606.6	7279.51
_AAGMSS[Phospho (STY)]PGAQSHPEELPR_.3	221582	NA	145929	158545	290481	NA	188677	NA	157335	163646	207893	191687	281963	294192	NA	162590	332443	223496	161570	180944	200088	NA	152165	NA	98553.4	86473.6	54470.9	47126.7	164119	165684	NA	205619	237963	289544	254225	281328	123703	NA	NA	230760	NA	NA	209442	205739	154009	NA	245501	234910	NA
_AAGPAS[Phospho (STY)]PPEEDPER_.2	73387.4	NA	NA	NA	84653.6	52119.7	75193	101018	69450.6	NA	51204.9	NA	103208	59542	54333.8	51717.8	95886.3	41996	64226.2	56687.4	87182.6	52157.6	44751.4	65280.2	NA	40246.6	NA	60803.2	77312.3	48384.6	NA	NA	54273.4	NA	42032.5	42119.1	12192.1	NA	NA	46646	43436.3	40729.4	NA	NA	40660.1	NA	101570	58229.1	65977.7
_AAGS[Phospho (STY)]PSPLPAPDPAPK_.2	153374	NA	95293	94635.2	180812	95118.7	112969	131858	107188	90146.4	106139	111761	229701	178032	134828	93080.7	215937	109518	111095	114850	133125	106908	78058	123534	196622	132441	90813.5	93592.5	151398	97045.2	85718.3	90113	156192	177050	99779.6	136288	76554.4	138063	218297	162854	138771	155489	185076	186883	145697	139079	164031	185293	149639
_AAGSPS[Phospho (STY)]PLPAPDPAPK_.2	65202.1	NA	38955.6	48598.8	83052.1	38708	41127	53312.9	39152.2	80105.6	98852.6	41628.9	211740	74639.5	54804.7	46401.6	119706	49447.1	NA	49748.8	48985.1	45174.6	36400.8	54798	93158.8	50687	81324.9	88128.9	76835.1	42779.7	80551.1	83441.4	58736.5	83308.3	42395.8	121571	26527.4	45905.9	82642.4	62604.8	40370.2	53869.3	63996.9	64000	48019.2	45670.3	54365.9	61927.8	64485.9
_AAHTEDINAC[Carbamidomethyl (C)]TLTTS[Phospho (STY)]PR_.3	66292.8	NA	57524.1	NA	52409.6	50500.6	40248.8	NA	60534.1	46467.7	53967.4	37254.3	78290.1	69760.2	50079	NA	72058.8	32837.3	NA	41226.1	42068.4	NA	31380.8	NA	NA	NA	NA	NA	45967.9	NA	71750.3	NA	46732.9	51071.3	51806.9	45445.8	17524.4	26173.1	47812.5	38746.4	NA	21983.6	35768.6	41653.5	NA	NA	109951	42267.4	25872.6
_AAHTEDINAC[Carbamidomethyl (C)]TLTTS[Phospho (STY)]PRLPVF_.3	NA	NA	NA	NA	NA	NA	NA	NA	NA	NA	NA	NA	NA	NA	NA	NA	NA	NA	NA	NA	NA	NA	NA	NA	NA	NA	NA	NA	NA	NA	NA	NA	NA	NA	NA	NA	NA	NA	NA	NA	NA	NA	NA	NA	NA	NA	31231.7	24825.6	NA
_AAHVPEN[Deamidation (NQ)]S[Phospho (STY)]DTEQDVLTVK_.3	145376	NA	90960	99700.7	150207	103933	112824	127548	100349	83429.3	70860.1	98167.4	165861	150640	99413.7	90341.9	159399	86403.9	110520	91864.2	113362	107261	71543.4	106944	145456	151729	98743.5	101962	85849.8	78291.2	74799.6	76678.8	68276.1	94495.4	44597.6	60471.6	43972.2	97948.7	145775	124518	91005.1	118907	139516	144013	111705	108614	111622	123655	80643.9
_AAHVPEN[Deamidation (NQ)]SDT[Phospho (STY)]EQDVLTVK_.3	111915	NA	66307	74916	117314	83625.3	86732	98515.5	70490.3	55854.6	51511.2	59165.5	124544	103179	71378.8	66132.1	120493	65096.7	87689.5	73371.1	87827.7	79707.7	58547.3	79462.5	114994	114800	71301.8	78757.6	68351.6	60450	60289.8	61285	52638.7	70055.8	34982.4	46618.6	35105.2	76286	107034	91283.7	72287.7	91792.7	105739	109268	81976.4	81894.2	84045.1	88998.3	58711.2
_AAHVPENS[Phospho (STY)]DTEQ[Deamidation (NQ)]DVLTVKPVR_.3	122128	NA	83423	82275.4	124877	87238	115930	140567	90989	78175	89924.4	75513.7	137643	95557	84325.9	86648.3	102758	60635.7	100894	91056.7	118218	92024.6	79977.7	100673	140312	94320.8	55791.2	93064.5	64543.8	44621.3	59468.8	50728.7	45235.4	49521.3	36963.5	45845.2	22054.4	59075.8	147473	96858.6	66381.6	97890.5	107765	119405	115594	109404	120652	121322	63693.7
_AAHVPENS[Phospho (STY)]DTEQDVLTVK_.3	112313	NA	67143.5	75638.8	118288	83681.2	87587	98838.6	71276.2	56262.3	52620.8	59985.9	126033	103869	70925.6	67925.9	121050	66888.1	86780.4	73675.7	87531.4	79855.7	58533.5	79448.9	115011	115553	71424.6	79357.9	70817.4	60028.2	60700.5	61310.8	53549.8	70451.7	34804	46658.2	35737.6	76625.7	108181	93810.7	72809.1	91672.2	106604	109425	82761.9	81646	85206	89909.1	59043.6
_AAHVPENS[Phospho (STY)]DTEQDVLTVKPVR_.3	166119	2087.66	117414	119363	168255	127153	159775	194642	133434	113402	126436	110453	191351	130517	120079	125036	146583	90178.5	143786	129860	163814	127342	116901	146196	191927	135232	84871.5	128693	94604.1	64037.3	85812.5	75593.1	67006	73810.5	54658.5	69844.2	32567.5	82969.6	199667	139371	96525.1	143630	150899	178709	160451	154953	165807	161190	98507.8
_AAHVPENS[Phospho (STY)]DTEQDVLTVKPVRK_.4	21355.7	NA	20199.1	20037.4	23436.4	23233.4	24942.5	41462.4	26588.6	21514.1	42350	43575.2	28356.7	31319.8	13527.9	22582.2	44760.1	28614.5	19908.2	19113.6	27433.2	30807.5	17539.5	31868.1	28744.2	23945.7	25356.8	20103.4	11619	18906.7	NA	11408.3	NA	14866.1	6417.61	NA	NA	9416.12	43108.2	18850.6	15366.3	13545.2	22808.3	30553	45477.2	30020.3	41231.9	41844.1	NA
_AAIELPSLEVLS[Phospho (STY)]DQEEDREQC[Carbamidomethyl (C)]GVK_.3	117961	NA	65809.2	70757.7	167637	82673.7	98062.9	118194	85588	82806.4	66098.2	66590.5	109641	74269.7	74344.6	NA	170845	77753.1	67325.5	91270	74982	64980	71182.8	75686.4	143819	77556.1	57726.7	64467.8	101788	55735.5	53349.3	62540.9	66518.1	66002.7	36928.7	56362.2	11899.5	60086.2	106886	97506.8	91036.6	100093	125526	118348	78758.8	101410	103660	115573	70590.4
_AAIPPPVY[Phospho (STY)]EEQ[Deamidation (NQ)]DRPRSPTGPSN[Deamidation (NQ)]SFLANM[Oxidation (M)]GGTVAHK_.5	118581	NA	53032.3	52471.4	102854	69278.1	68912.1	79019.6	NA	83725.9	58866.7	101672	135270	115448	62756.7	NA	147849	93019.1	NA	85838	68160.4	NA	59279.3	103076	129447	90010.1	49264.4	60480.4	119682	82714.5	56224.6	59789.8	NA	83813.5	NA	57737.2	34699.1	55030.9	85263.7	56035.5	63408.8	51210.2	65787	76171.9	69036.4	76881.3	85550.7	107999	70125.8
_AAIPPPVY[Phospho (STY)]EEQ[Deamidation (NQ)]DRPRSPTGPSN[Deamidation (NQ)]SFLANMGGTVAHK_.5	2.26534e+06	82062.2	1.22228e+06	1.36461e+06	2.42533e+06	1.29991e+06	1.55152e+06	1.76649e+06	1695692	1.72897e+06	1.50065e+06	1.75773e+06	3.42954e+06	2.28698e+06	1.86133e+06	1.69467e+06	3.80602e+06	1.90387e+06	1.49468e+06	1.85894e+06	1.64778e+06	1.47031e+06	1.42562e+06	1.96911e+06	2497454	1.46488e+06	1175815	1.25508e+06	2.30553e+06	1575628	1.36744e+06	1.26757e+06	1.02784e+06	1.37689e+06	844448	966945	397503	1.06764e+06	2280739	1611746	1.01726e+06	1.26062e+06	1.49852e+06	1.77519e+06	1.37323e+06	1.45922e+06	1.6983e+06	2.17954e+06	1.21461e+06
_AAIPPPVY[Phospho (STY)]EEQ[Deamidation (NQ)]DRPRSPTGPSNSFLANMGGTVAHK_.4	3425348	181596	1.99455e+06	2.34119e+06	3.40178e+06	2.05691e+06	2331517	2.86179e+06	2.37839e+06	2.34825e+06	2.54731e+06	3115371	4.49289e+06	3.2296e+06	2.7585e+06	2.82467e+06	5045543	2.71441e+06	2558575	3024019	2478302	2.27009e+06	2.56141e+06	3.3398e+06	3.7591e+06	2398329	1.90763e+06	2.14795e+06	3.79796e+06	2.48212e+06	2.17115e+06	2262307	1.70461e+06	2.26754e+06	1.62689e+06	1.83296e+06	975408	1.7918e+06	3.06256e+06	2.4816e+06	1.71381e+06	2.06143e+06	2.63607e+06	2835944	2112960	2.134e+06	2.63953e+06	3030860	2.32494e+06
_AAIPPPVY[Phospho (STY)]EEQDRPRSPTGPSN[Deamidation (NQ)]SFLANM[Oxidation (M)]GGTVAHK_.5	74942.7	NA	45326	49346.6	69154.1	58557	56379.1	46444	53670.8	61890.9	NA	70933.6	83685.5	88190.5	56596.2	57243.2	98566.4	67319.4	53368.7	62538.9	NA	53194.9	NA	70892	80763.8	60247.2	48428.6	44659.4	96369.9	55517.4	43947.6	43939.7	45562.8	NA	64373.8	47040.2	22508.6	39571.4	56134.6	40834.7	39647	34844.8	45899.2	53010	53116.7	38243.1	66970.1	87348.8	NA
_AAIPPPVY[Phospho (STY)]EEQDRPRSPTGPSN[Deamidation (NQ)]SFLANMGGTVAHK_.5	2.26581e+06	82183.5	1.21958e+06	1.3656e+06	2.41167e+06	1.29915e+06	1.54993e+06	1.74299e+06	1.68933e+06	1.71684e+06	1.50007e+06	1.7531e+06	3.42256e+06	2.28536e+06	1.85704e+06	1.69457e+06	3.79789e+06	1.91278e+06	1.49468e+06	1.8559e+06	1.63593e+06	1.46363e+06	1.43112e+06	1.9781e+06	2479910	1.42991e+06	1175714	1.253e+06	2.29681e+06	1.57086e+06	1.36744e+06	1.27137e+06	1.02802e+06	1.37564e+06	845776	965739	397518	1.06019e+06	2.29292e+06	1.60773e+06	1.01883e+06	1.25701e+06	1.49783e+06	1.7842e+06	1.38187e+06	1.45884e+06	1.68185e+06	2.18219e+06	1.21291e+06
_AAIPPPVY[Phospho (STY)]EEQDRPRSPTGPSNSFLAN[Deamidation (NQ)]MGGTVAHK_.5	1.58203e+06	50282.4	829282	934916	91049.4	878527	1.05636e+06	1.20368e+06	1.15213e+06	83233.6	1.01532e+06	1206469	130262	1.58396e+06	84197.1	1.16357e+06	2.68663e+06	105218	1.02328e+06	1.27482e+06	72834.3	1004702	969996	1.34819e+06	1.78627e+06	985184	803395	855867	102620	1078916	62287.5	869564	697049	932358	577900	655042	266308	713754	119392	1.09385e+06	683322	857130	1.01793e+06	1.2286e+06	969495	1000019	1.14643e+06	1.49335e+06	810976
_AAIPPPVY[Phospho (STY)]EEQDRPRSPTGPSNSFLANM[Oxidation (M)]GGTVAHK_.5	111581	NA	80767.8	103632	134078	112647	90591	90981.3	NA	117727	NA	NA	153557	148824	102657	NA	187428	122362	NA	NA	116195	NA	NA	NA	158570	123852	58933.4	79024.9	159570	106997	NA	NA	94239.6	125462	NA	NA	44820.8	76158	104533	84190.1	87098.3	69901.9	97262.9	101202	98579.3	104072	NA	162628	96676.4
_AAIPPPVY[Phospho (STY)]EEQDRPRSPTGPSNSFLANMGGTVAHK_.4	2.46877e+06	141210	1.35227e+06	1.57662e+06	2.43391e+06	1.42107e+06	1.61271e+06	1.94903e+06	1.66353e+06	1632807	1.71403e+06	2.15719e+06	3331795	2347282	1.90596e+06	1.9538e+06	3681406	1.90406e+06	1.76482e+06	2116133	1.73744e+06	1.58404e+06	1763811	2.35527e+06	2.79827e+06	1.64424e+06	1.27834e+06	1459708	2.64887e+06	1.69284e+06	1.49466e+06	1.54844e+06	1.14596e+06	1590819	1.08168e+06	1238827	602164	1.15465e+06	2.20262e+06	1.67638e+06	1.14349e+06	1.39963e+06	1.80364e+06	1.96326e+06	1.50006e+06	1.49317e+06	1.13082e+06	2.16889e+06	1.5399e+06
_AAIPPPVYEEQDRPRS[Phospho (STY)]PTGPSNSFLANMGGTVAHK_.4	2916371	118116	1.66697e+06	1.99408e+06	2.86373e+06	1.73769e+06	1.9415e+06	2.3765e+06	2.00357e+06	1.95971e+06	2.12907e+06	2635441	3.75439e+06	2.68979e+06	2.3174e+06	2.38012e+06	4186459	2.25846e+06	2.14189e+06	2.54818e+06	2.06005e+06	1.92534e+06	2.14824e+06	2.80647e+06	3.22738e+06	2.05557e+06	1616110	1.83258e+06	3203516	2.11773e+06	1.85142e+06	1.92123e+06	1.4648e+06	1.94593e+06	1363793	1.56796e+06	837089	1.53056e+06	2554005	2.07094e+06	1.45247e+06	1.77058e+06	2.24365e+06	2.39059e+06	1.75836e+06	1804097	2.13138e+06	2.57013e+06	1.93434e+06
_AAISQLRS[Phospho (STY)]PR_.2	NA	NA	NA	NA	NA	NA	NA	NA	NA	NA	NA	21756.9	NA	NA	NA	NA	NA	NA	NA	NA	NA	NA	NA	NA	NA	NA	NA	NA	NA	NA	NA	NA	NA	29126.3	NA	26240	NA	NA	NA	NA	NA	NA	NA	NA	NA	NA	NA	NA	NA
_AAITETQRKPS[Phospho (STY)]EDEVLNK_.3	NA	NA	NA	NA	NA	NA	NA	NA	NA	NA	24436.4	39009	NA	34145.1	NA	NA	60696.5	25475.2	NA	NA	NA	29279.3	NA	21481.6	NA	19670.7	22715.2	NA	NA	17454.5	NA	NA	NA	19503.2	NA	NA	NA	NA	17574.2	NA	NA	NA	NA	NA	20330.8	NA	14094.7	14474.1	NA
_AAKLS[Phospho (STY)]EGS[Phospho (STY)]Q[Deamidation (NQ)]PAEEEEDQETPSR_.3	208382	186727	187789	154667	130444	140801	136971	167797	118302	77987.5	100695	79753.6	216474	326340	251086	151586	123469	94628.2	111396	100687	131019	92862.5	86345.6	67608.2	155026	167526	151154	119860	39462.3	48176.8	50724.8	48057.3	77558.2	100022	76407.1	71684.1	NA	131045	325196	270334	157929	111082	126793	169217	195232	135203	141878	87124.6	135806
_AAKLS[Phospho (STY)]EGS[Phospho (STY)]QPAEEEEDQETPSR_.3	217273	194828	198336	162102	141876	145145	148265	175383	126248	83029.3	105661	81671.1	227368	341782	264276	163690	130725	103890	118143	106466	137359	100603	95640.4	70728.3	162048	171314	164260	129165	44783.7	52306.6	53354.1	49882.6	84127	107066	82845.3	75766.6	NA	134718	334964	277515	165114	115982	131620	178639	201499	140542	150741	88131.2	141099
_AAKLS[Phospho (STY)]EGSQPAEEEEDQ[Deamidation (NQ)]ETPSR_.3	146397	10957.9	103513	83569.8	92853.4	96766.9	127294	134536	94302.2	65561.3	76834.8	51453.3	179209	214514	164472	104229	137499	80088.6	84742.5	74571.1	131931	97869	64289.5	73884	94296.7	88563.5	81451.5	59622.2	22292.7	25795.2	25381.4	28845.6	44359.1	64773.9	47202	37063.4	9366.38	79094.7	188220	119139	87076.3	58913.2	85063.5	119286	103646	87584.6	81877	68480.4	70934
_AALAPAKES[Phospho (STY)]PR_.2	NA	NA	24124.9	NA	NA	NA	25371	27023.5	28151.2	NA	NA	NA	NA	NA	NA	NA	NA	NA	NA	16598.2	26741.4	26459	NA	NA	NA	31475.7	NA	NA	NA	NA	NA	NA	NA	NA	NA	NA	10274	NA	NA	15581.9	26403.1	20423.1	26859.5	27826.5	37344.4	21773.5	25677	28602.1	16283.6
_AALDGGVASAAS[Phospho (STY)]PESKPSPGTK_.3	NA	NA	NA	NA	NA	NA	NA	45274.2	NA	NA	58598.6	48225.4	NA	NA	NA	NA	NA	NA	NA	NA	NA	NA	NA	NA	NA	NA	NA	NA	NA	NA	NA	NA	NA	NA	NA	NA	NA	NA	NA	NA	NA	NA	NA	NA	NA	NA	NA	NA	NA
_AALGLQDS[Phospho (STY)]DDEDAAVDIDEQIESM[Oxidation (M)]FNSK_.3	115267	NA	75523.3	61963.9	53449.4	71187.5	68194.2	62254.8	63298	61420	48162.5	71615.3	45616.6	65888.2	63950.1	76625.7	NA	49845.7	61279.6	78325.3	60187.5	78472.2	62872.7	59141.5	62752.9	NA	38701.6	75726	NA	62921.1	57309.4	71024.2	74672.9	28121.9	68151.9	68082.9	NA	25442.5	108097	87510.1	40070	NA	46815.8	52748.1	51639.4	57368.8	101375	63203.2	NA
_AALGLQDS[Phospho (STY)]DDEDAAVDIDEQIESMFN[Deamidation (NQ)]SKK_.3	NA	NA	NA	NA	81910.3	NA	NA	NA	NA	NA	NA	NA	NA	NA	NA	NA	NA	NA	NA	87436.5	NA	NA	NA	NA	NA	NA	115606	NA	NA	NA	NA	NA	NA	NA	NA	NA	NA	NA	NA	NA	NA	NA	NA	NA	NA	NA	NA	NA	NA
_AALGLQDS[Phospho (STY)]DDEDAAVDIDEQIESMFNSK_.3	479589	46060.1	413828	112746	279705	129564	149459	772350	97581.5	451484	457678	86912.6	808528	NA	812954	75340.3	312678	109608	266869	135456	291473	879382	64781.2	103451	84003.1	204550	112080	1005648	456190	109969	833306	804335	76781.3	363303	599566	194703	NA	23513.8	100429	745458	62372.5	NA	82973.8	385158	136008	94129.8	158915	229891	23872.8
_AALLAQYADVT[Phospho (STY)]DEEDEADEK_.2	285990	NA	217857	255567	365684	174503	279703	284745	220337	207619	168983	152219	356081	149345	231297	250208	164437	142391	237449	314752	241632	144040	230615	145225	232619	48332.5	126812	304533	254567	121767	250599	288085	163553	59553.8	177763	233028	NA	46770.3	232663	258123	190083	81242.8	186601	243218	104018	184297	228162	163361	110474
_AALLAQYADVT[Phospho (STY)]DEEDEADEKDDSGATTMNIGSDK_.4	71592.3	NA	90820.2	80489	110013	92394.9	79048.8	97052.7	82242	84964.8	89143.5	104435	115018	84885.1	93741.1	91609.9	99838.1	100421	56747.5	91996.4	79155.1	102261	69641.4	98454.2	110387	NA	84698.4	69303.5	73205.3	74874.8	55962.2	57632.2	48590.2	NA	52620.8	44283	NA	NA	107012	81799.1	54092	NA	60173.1	65929.7	67760.1	61613.8	60960.6	96278.1	30656.7
_AALPAATTPGPGLETAGPADAPAGAVVGGGS[Phospho (STY)]PR_.3	NA	NA	NA	NA	NA	NA	NA	NA	NA	NA	NA	NA	NA	NA	NA	NA	NA	50492.1	NA	NA	NA	NA	NA	NA	NA	NA	NA	NA	NA	87480.9	53597.7	133364	NA	NA	NA	NA	27526.3	NA	NA	NA	NA	NA	NA	NA	NA	NA	NA	NA	NA
_AALPSLTNPPSLS[Phospho (STY)]PIRR_.3	NA	NA	NA	NA	NA	NA	NA	3740.52	NA	NA	NA	NA	NA	NA	NA	NA	NA	NA	NA	NA	NA	NA	NA	NA	NA	NA	NA	NA	6535.21	NA	NA	NA	NA	NA	NA	NA	NA	NA	NA	NA	NA	NA	NA	NA	NA	NA	5350.07	4286.91	NA
_AALQELLS[Phospho (STY)]K_.2	2735.73	NA	NA	NA	3606.36	NA	NA	NA	NA	NA	2018.3	NA	4119.05	NA	NA	NA	4748.97	NA	NA	NA	NA	NA	NA	NA	3033.24	NA	NA	NA	NA	3278.91	NA	3058.47	NA	NA	NA	NA	NA	NA	NA	NA	NA	NA	NA	NA	NA	NA	NA	NA	NA
_AALS[Phospho (STY)]ASEGEEVPQDK_.2	NA	NA	NA	NA	NA	NA	NA	NA	NA	NA	NA	NA	NA	NA	NA	NA	NA	NA	NA	NA	NA	NA	NA	NA	NA	NA	NA	NA	NA	NA	NA	NA	191487	190734	271792	NA	15711.9	NA	NA	NA	NA	NA	NA	52716.6	NA	NA	NA	NA	82678.2
_AALS[Phospho (STY)]EEELEK_.2	70612.2	NA	43968.4	40046	75856.8	35246	44127.7	38320	44905.6	38400.2	38005.9	67399.8	73995.8	42071.9	37903.2	30242.2	82231.2	48001.3	60055.8	47232.8	44593.5	42258.1	26894.3	41847.4	65035.6	28982	34248.2	36651.8	94571.2	59048.1	51969.5	59354.5	71409.5	62852	46443.2	67524.5	26038.3	38597.7	57647.7	50877.6	48305.8	57502.3	60237.9	72212.8	42635.3	46717.3	63094.9	81701.4	50679.4
_AALS[Phospho (STY)]EEELEKK_.2	19483.8	NA	NA	NA	NA	NA	NA	NA	NA	NA	38797.6	28021.9	NA	NA	NA	NA	30716.2	19657.1	NA	NA	NA	NA	NA	NA	NA	NA	NA	NA	NA	15638.8	NA	16396.3	NA	NA	NA	NA	NA	NA	NA	NA	NA	NA	NA	NA	NA	NA	21819.5	22365.4	NA
_AALSAS[Phospho (STY)]EGEEVPQDK_.2	NA	NA	NA	NA	NA	NA	NA	NA	NA	NA	NA	NA	NA	NA	NA	NA	NA	NA	NA	NA	NA	NA	NA	NA	NA	NA	NA	NA	NA	NA	NA	NA	NA	384863	NA	NA	NA	NA	NA	NA	NA	NA	NA	NA	NA	NA	NA	NA	173562
_AALSS[Phospho (STY)]SELLELGDSLMR_.2	NA	NA	NA	NA	NA	NA	NA	NA	NA	NA	NA	NA	NA	NA	165498	NA	105318	NA	NA	NA	NA	NA	NA	NA	NA	NA	NA	NA	NA	NA	NA	NA	NA	NA	NA	NA	NA	NA	NA	NA	NA	NA	NA	NA	NA	NA	NA	NA	NA
_AAM[Oxidation (M)]YDIISS[Phospho (STY)]PSK_.2	65405.9	NA	48436.9	56795.2	66164.7	55861.9	61726.5	68313.6	NA	39228	55512.7	47482.5	NA	NA	42723.7	38147.8	NA	NA	53759.5	56257.7	NA	63595.3	40281.2	57673.3	75506	61377.7	54511.4	66181.1	NA	NA	32018.6	NA	NA	NA	26441.8	NA	21823.7	40794.6	NA	50964.9	NA	46430.9	47419.4	59263.7	NA	51516.4	62386.6	88354.4	38163.7
_AAMYDIISS[Phospho (STY)]PSK_.2	622584	8966.62	381410	431346	642874	409539	549514	603295	467225	305316	382432	339225	582545	366130	339635	268112	425566	220018	331823	399988	493360	408570	294286	420142	638434	455338	356898	506140	192074	135004	167391	148597	145450	170213	129943	127473	132094	240549	421133	283269	214403	401785	299186	381728	369909	375123	494410	467551	158716
_AANQVEETLHTHLPQT[Phospho (STY)]PETNFR_.4	53386.3	NA	20857.7	24759.6	40117	24465.4	27922.5	28510.8	22258.5	24252.6	20207.4	26772.1	54762.5	32033	25288.5	20036.3	56914	22747.5	23201	NA	25543.5	25608.7	19679.3	27960.3	56092	27119.6	18910.4	24100	35369.9	NA	NA	19742.4	NA	26621.5	13456.3	NA	7956.58	19684.5	33531.2	NA	15634.8	18395.5	21821.9	25326.1	24325.6	20138	27041.6	34739.8	18879.5
_AAPAQVRPPS[Phospho (STY)]PGNIRPVK_.3	NA	NA	NA	NA	NA	NA	NA	NA	NA	NA	NA	NA	NA	NA	NA	NA	NA	NA	NA	NA	NA	NA	NA	NA	NA	NA	NA	NA	NA	NA	NA	NA	NA	NA	NA	NA	NA	NA	NA	NA	NA	NA	NA	NA	NA	NA	NA	NA	NA
_AAPEASS[Phospho (STY)]PPAS[Phospho (STY)]PLQ[Deamidation (NQ)]HLLPGK_.3	588462	273204	643016	618043	403454	610821	624748	698133	647304	653917	582334	489547	639248	1.4558e+06	1361719	865386	576232	468201	519669	344684	569227	688730	417448	586709	368347	530197	363431	350411	131748	238665	244829	190418	251865	476399	313044	326646	378655	442289	757302	858212	458024	458080	267723	385347	613816	537503	833217	435304	304705
_AAPEASS[Phospho (STY)]PPAS[Phospho (STY)]PLQHLLPGK_.3	594198	274999	650000	646416	414238	630181	646832	711814	674698	680946	599993	506043	659744	1.50889e+06	1.38969e+06	874770	595704	484774	525756	358057	587297	703302	428865	601336	373626	546288	374236	358962	133699	242323	250696	191219	257648	489561	310868	330390	383382	449833	782366	876538	462277	470480	271440	398586	627224	553988	858521	442493	316034
_AAPEASS[Phospho (STY)]PPASPLQ[Deamidation (NQ)]HLLPGK_.3	937893	15446.4	502836	560672	560253	230616	347334	351552	303106	302882	315789	323176	753543	686951	725053	585148	519260	248129	271172	281265	225016	204837	182230	233070	813922	389989	441659	438608	186310	96927.2	103225	110886	154669	134143	98435.3	119022	343228	431342	556261	488153	262269	330987	283406	276056	229379	225202	264511	219564	235554
_AAPEASS[Phospho (STY)]PPASPLQHLLPGK_.3	1.61315e+06	20290.4	858889	974412	961224	395096	609382	607294	520596	521561	553325	555395	1.27625e+06	1.17194e+06	1.25293e+06	1.01441e+06	886592	418331	461364	494304	398875	355007	314597	393189	1.40084e+06	673439	764640	756573	317910	169505	175791	192322	275454	233725	166652	211113	622846	749828	965318	840548	470150	583797	492645	468735	404472	391016	452819	384910	422471
_AAPEASSPPAS[Phospho (STY)]PLQHLLPGK_.3	865650	NA	NA	515836	519098	213087	317592	321113	272343	279762	NA	12619.9	699826	634052	665571	539256	481694	223645	10590	259704	206496	NA	NA	NA	754230	357647	411798	397938	170898	91109.4	94839	NA	NA	119805	12884.1	17473.7	317417	NA	506843	445472	243121	308848	NA	249146	209367	NA	234650	200419	217623
_AAPEEHDS[Phospho (STY)]PT[Phospho (STY)]EASQPIVEEEETK_.3	NA	NA	178081	NA	NA	NA	NA	NA	NA	NA	NA	320127	NA	NA	NA	NA	NA	NA	NA	NA	NA	NA	NA	NA	314003	NA	NA	222593	253176	NA	225786	NA	NA	NA	NA	128098	NA	195176	NA	NA	186711	NA	NA	NA	205388	NA	NA	330877	NA
_AAPPPPALT[Phospho (STY)]PDS[Phospho (STY)]QTVDSSC[Carbamidomethyl (C)]K_.3	NA	NA	NA	NA	NA	NA	NA	NA	NA	NA	NA	NA	NA	NA	NA	NA	NA	NA	NA	NA	NA	NA	NA	NA	NA	NA	NA	NA	NA	NA	NA	NA	NA	NA	NA	NA	NA	NA	NA	NA	NA	NA	NA	NA	NA	NA	NA	NA	NA
_AAPPPPALT[Phospho (STY)]PDSQTVDSSC[Carbamidomethyl (C)]KT[Phospho (STY)]PEVSFLPEEATEEAGVR_.4	775573	130981	724355	632289	759884	800869	687546	775328	866661	659827	678332	518717	695051	894251	725362	659812	833499	734295	607702	672454	844594	679458	642437	520077	857530	1.21426e+06	662739	616715	713822	807222	680951	716462	631305	828376	504078	412420	142188	854112	1.29547e+06	1.30059e+06	1.01156e+06	929759	949201	1.16805e+06	1.30138e+06	1.09794e+06	1264731	976520	882685
_AAPPPPALTPDSQ[Deamidation (NQ)]TVDSS[Phospho (STY)]C[Carbamidomethyl (C)]KT[Phospho (STY)]PEVSFLPEEATEEAGVR_.4	771154	130981	724355	633023	759884	800869	687429	773122	866661	659827	682535	505719	695051	892640	725362	660250	833499	733379	607171	668050	844594	679458	644309	520077	857530	1.21389e+06	662739	616715	713822	804683	670842	724231	631305	828376	504078	412420	142149	854771	1.29547e+06	1.30059e+06	1011957	929759	943792	1.16805e+06	1.30138e+06	1.09794e+06	1.27519e+06	976520	871963
_AAPPPPALTPDSQTVDSSC[Carbamidomethyl (C)]KT[Phospho (STY)]PEVSFLPEEATEEAGVR_.4	132405	NA	110952	144253	153147	135422	NA	148871	NA	130314	NA	84340.4	198323	106232	NA	76035.5	173368	143764	120041	95386.2	NA	96220.9	116184	139807	136255	207422	77601.4	NA	133638	167134	80435.4	73303.1	81243.4	NA	NA	NA	19491.1	NA	118793	NA	NA	NA	92723.7	84544.1	108780	77653.6	121575	116262	98776.5
_AAPPPPPPPPPLES[Phospho (STY)]SPR_.2	297023	NA	157456	184944	344037	223342	290652	331517	251198	198313	224403	232891	339631	206205	NA	NA	367562	202445	186537	193745	315165	239977	183010	273328	322003	NA	152249	225120	112437	162612	193783	169047	NA	NA	NA	NA	NA	95803.1	259751	NA	NA	NA	NA	219851	216656	215508	267519	345544	121939
_AAPPPPPPPPPLESS[Phospho (STY)]PR_.3	209584	NA	138229	161002	311411	213002	242392	252820	220740	175936	198180	183032	252290	179561	135321	123350	275832	143826	175612	175908	275268	197441	157924	222201	244526	190082	138227	155093	264611	170051	174519	157295	132466	141784	85044.6	115248	4197.37	118317	204826	142269	133287	170416	190955	223574	217450	207413	243004	301366	123084
_AAPQS[Phospho (STY)]PSVPK_.2	367054	NA	247982	234917	365026	334881	335685	384398	312411	83961.7	311829	341159	399739	373296	298033	95673.9	272936	184619	222223	224825	291196	228906	68102.6	300391	323723	317079	231359	226875	259516	188008	191899	277260	345007	343437	271414	300886	196164	216685	256750	268574	252557	242820	254594	249933	343656	257781	333300	338298	240364
_AAQAPS[Phospho (STY)]PWGASGK_.2	38224.5	NA	22161.7	30831.7	47854.3	37936.2	35750.8	47676.7	37818.5	35344.9	46788.9	43895.2	47355.3	26833.7	20058.1	13441.5	37681.3	NA	26726	25516.6	30806.2	19706.8	20500.5	36515.3	39443	25147.7	17419.5	22475.9	NA	NA	NA	NA	NA	NA	NA	NA	7278.77	11938.8	24185.4	NA	NA	16718	NA	26416	NA	25589.9	32629.1	29131.2	NA
_AAQPPAQPC[Carbamidomethyl (C)]QLC[Carbamidomethyl (C)]GRS[Phospho (STY)]PLGEAPPGTPPC[Carbamidomethyl (C)]R_.3	NA	NA	NA	NA	51273.3	NA	NA	NA	NA	NA	NA	NA	NA	NA	NA	NA	NA	NA	NA	NA	NA	NA	NA	NA	NA	NA	NA	NA	26445.1	NA	NA	NA	NA	NA	NA	NA	7959.65	37444.5	NA	NA	42771.1	47550.6	57588.9	67886.3	NA	NA	NA	NA	34975.5
_AAQQDS[Phospho (STY)]DS[Phospho (STY)]DGEALGGNPMVAGFQDDVDLEDQPR_.4	NA	NA	47238.5	37649.3	52447.2	60859.6	46012.4	62633.2	69100.6	64693.8	55038.7	51267.7	59012.7	NA	51488.5	47550.9	NA	NA	44306.8	38839.8	61699.6	43247.6	51322.2	71195.1	NA	NA	42334.1	46984.5	38392	NA	45658.2	46151.5	NA	NA	NA	33699	NA	NA	70097.3	75121.2	NA	NA	49881.4	50128.3	NA	63768.1	113848	80281.3	NA
_AAQQDS[Phospho (STY)]DSDGEALGGNPMVAGFQDDVDLEDQPR_.4	NA	NA	NA	NA	NA	NA	NA	NA	NA	NA	NA	NA	NA	NA	NA	NA	NA	NA	NA	NA	NA	NA	NA	NA	NA	NA	NA	NA	NA	167859	NA	97802.3	NA	NA	NA	NA	NA	NA	NA	NA	NA	NA	NA	NA	NA	NA	169352	NA	NA
_AAQSPFSIPN[Deamidation (NQ)]SSSGPYGS[Phospho (STY)]QDSVHSSPEDGGGGR_.4	38268.9	9890.36	39115.2	37922	38541.8	40670.8	41225.6	33600	45765.4	64431.8	57234	44068.4	69494.6	76799.5	72398.5	57353.1	77514.8	60529.3	52314.2	78431.7	53894.8	59028.6	44680.3	69372.6	40945.1	46483	26698.8	35285	60827.8	58987.6	47494.1	50202.1	54476.2	59410.3	41531.6	NA	9213.75	38336.5	91586.9	62010.6	23843.2	39364.6	36772.4	53239	50931.4	56238.8	65058.5	70088.6	49067.1
_AAQSPFSIPNSSSGPYGS[Phospho (STY)]QDSVHSSPEDGGGGR_.3	265197	48492.4	247831	193102	214412	235898	279636	269496	300987	236684	301774	260399	455219	532883	419431	329687	445321	412696	413533	408539	441934	425086	329327	432686	270059	275850	229951	215378	238793	365220	266581	270481	260783	297804	211704	212749	82988.1	286821	378302	376840	227181	343204	312483	346276	319891	356386	471318	381018	434052
_AAQSPFSIPNSSSGPYGSQDS[Phospho (STY)]VHSSPEDGGGGR_.4	45952.6	10576.3	37651.6	27588.7	38512.7	43910.9	43499.8	39701.1	51561.4	46407.1	53062.6	44886.2	74825.2	67742.4	68231.9	54592.5	64965.6	58114	55749.8	66682	58735.5	61319	43208.3	64382.2	47018.9	37915.3	31079.1	32629.3	43061.7	62019.6	55317.1	43791.4	38086.2	54693.2	34435.9	NA	10011.6	39449.2	60970.9	46432.8	25592.2	41277.6	35427.9	45353.7	44579.9	52745.8	61205	60057.9	51108.2
_AAS[Phospho (STY)]AAGAAGSAGGSSGAAGAAGGGAGAGTRPGDGGTASAGAAGPGAATK_.4	10923.1	NA	NA	NA	18604.2	10517	NA	8564.96	NA	8906.58	NA	NA	20046	7684.62	6334.13	7741.77	14532.5	9830.79	NA	7208.82	10312.2	NA	NA	4564.02	14577.5	15792.2	NA	NA	15963.7	9486.3	9205.74	NA	10703	NA	11089.2	13548.7	6775.63	8672.43	11613.5	6991.62	6235.2	8380.72	NA	8576.66	9082.41	10201.7	NA	NA	11128.1
_AAS[Phospho (STY)]AATAAPTATPAAQESGTIPK_.3	428247	NA	247181	259494	491052	307711	323283	406390	383037	304992	322615	367036	574618	421399	287991	269802	528643	281111	336466	340650	461749	328352	239074	376828	490978	317811	233919	270011	457443	345748	298494	344044	267605	283909	177460	234621	143644	235931	475087	300269	233073	301391	350626	419638	352219	389623	438887	554978	258595
_AAS[Phospho (STY)]ADS[Phospho (STY)]TTEGTPADGFTVLSTK_.3	171632	63826.6	130666	141844	147464	127994	113916	112375	110091	124278	182865	140056	152949	235438	156712	137917	233709	234535	223783	153003	117651	131456	116763	103647	175734	209932	133294	164167	290089	311001	281504	290704	536734	610740	435733	525522	NA	144271	136434	110137	98872.6	114136	75634.1	85653	119655	90472.9	112115	80374.6	108623
_AAS[Phospho (STY)]ADYLRPR_.2	15912.9	NA	NA	12033	27615	NA	11642.6	15885.5	12167.4	6063.89	10181.3	11172.4	18303.1	11464.8	8413.78	NA	17323.1	8203.68	8515.1	8391.72	11872.3	6215.33	4134.04	8020.68	25753.9	12506.4	9419.52	10747.2	16827.9	5827.1	12244.8	7834.67	9916.68	8340.16	5438.19	6845.12	10393.3	17891.5	29241.5	26466.7	16845.4	16150.9	17983.6	20903.6	19182.5	19547.9	27166.1	20730.1	12739.6
_AAS[Phospho (STY)]AIYSGYIFDYDYYR_.2	NA	NA	NA	NA	NA	NA	NA	NA	NA	NA	NA	NA	NA	NA	NA	NA	NA	NA	NA	NA	NA	NA	NA	NA	NA	NA	NA	NA	NA	NA	NA	26424.1	42960.5	NA	31721.7	42692.1	NA	NA	NA	NA	NA	NA	NA	NA	NA	NA	NA	NA	NA
_AAS[Phospho (STY)]AIYSGYIFDYDYYRDDFYDR_.3	NA	NA	NA	NA	NA	NA	NA	NA	NA	NA	NA	NA	NA	NA	NA	NA	NA	NA	NA	NA	NA	NA	NA	NA	NA	NA	NA	NA	NA	NA	NA	NA	21878.9	NA	NA	27752.9	NA	NA	NA	NA	NA	NA	NA	NA	NA	NA	NA	NA	NA
_AAS[Phospho (STY)]DPLLSSVSPAVSK_.2	34456.4	NA	25096.5	27781.6	38633.5	27001	26019.7	31674.4	NA	NA	NA	27634.1	48755	32131.3	NA	NA	53396.8	35939.8	40961.7	37304.6	27071.7	32213.6	NA	NA	42716.6	NA	NA	NA	NA	NA	37951.2	NA	31162.5	NA	33676.6	44280.2	18926.5	27037.6	52915.1	28982.2	26499.6	36796.8	34444.1	23927.6	31876	23693.4	NA	26041.8	28101.4
_AAS[Phospho (STY)]DTERDGLAPEK_.2	58750.4	NA	40562.3	NA	53680.6	36295.4	45181.3	52323.2	41326.6	25013.3	NA	48593.1	65496.5	57011.2	50379.2	29358.2	80636.5	NA	46317	48499.5	55842.5	50022.4	26139.7	48376.8	58878.9	63616.5	40103.4	39020.8	43842.8	49766.5	39126	40213.9	28857.5	47258.9	22912.4	23408.4	11862.5	34173.2	74125.3	65885.4	42189.6	40464.4	52419	56101	64132.1	57971.3	69429.6	65987	36127.1
_AAS[Phospho (STY)]EVAGVVANAPS[Phospho (STY)]PPESSSLC[Carbamidomethyl (C)]ASK_.3	NA	NA	NA	NA	NA	NA	NA	NA	NA	NA	NA	NA	NA	NA	NA	NA	NA	NA	NA	NA	NA	NA	NA	NA	NA	NA	NA	NA	NA	NA	NA	NA	NA	NA	NA	NA	NA	NA	NA	NA	NA	NA	NA	NA	NA	NA	NA	NA	NA
_AAS[Phospho (STY)]GEDSTEEALAAAAAPWEGGPVPGVDR_.3	87216	NA	58958.7	45246.1	64230.4	46208	52591.4	72398	70754.7	66675	60244.8	59206.7	125978	186897	118415	100948	75213.5	47938.4	41154.9	53899.2	50659.4	46853	49277.6	63660.1	75559.1	61092.2	52606.5	49661.9	32299.5	30381.3	29136.5	35132.3	40570.1	31012.4	49110.2	50467.1	8110.87	45904.4	87543.7	77982	32761.9	24039	48100.9	44545.9	32503.3	38079.8	64173.8	54488.2	58015.3
_AAS[Phospho (STY)]ITSEVFNK_.2	17774.2	NA	12132.2	15227.9	23729.1	13826.7	13184.8	15707.9	11688.6	11759.9	NA	14311.2	26815.1	21124.8	12846.5	11409.7	33100	12685.1	13203.1	12528.1	16352.9	12512.9	NA	14036.5	24132	20459.2	12938.5	16280.3	25491.1	17395.6	14361	15382.4	16176.1	18166.6	NA	NA	11820.5	15533.8	21560.1	15636.6	10671.4	14645.9	13681.8	NA	15073.1	14193.3	16498.5	21089.5	14777.1
_AAS[Phospho (STY)]LMNLENI_.2	3562.05	NA	NA	4205.59	6875.19	3088.92	4483.7	4811.89	4180.85	2988.03	3645.24	2165.1	5224.89	NA	3011.39	3798.91	7117.43	3841.54	3594.07	4007.42	4751.84	NA	2548.7	3683.91	5433.3	2992.15	3439.94	3553.55	5099.51	2023.19	2665.87	NA	NA	NA	NA	NA	NA	NA	4067.88	NA	1297.94	NA	3376.01	NA	NA	NA	NA	2440.68	NA
_AAS[Phospho (STY)]LNYLNQ[Deamidation (NQ)]PSAAPLQVSR_.2	139484	NA	124083	191310	286842	136177	99996.8	161872	92551.2	87672.6	113343	183475	267384	327208	208650	190790	560127	254673	164751	202013	148346	100897	115485	140762	280634	399473	160596	192514	381063	193943	322119	240053	221880	313165	213340	247557	109949	209192	208992	156134	158941	173651	126145	151214	124968	104890	122055	111974	187725
_AAS[Phospho (STY)]LNYLNQPSAAPLQ[Deamidation (NQ)]VSR_.2	NA	NA	48310.8	69176.6	104153	50699.5	47449.5	60372	46702.3	65588.2	39524.1	64686.2	94323.8	119491	82018	67876.9	202644	98391.9	62030.2	75158.4	50630.8	54048.5	44622.9	55013.6	104008	139886	57625.7	72704	134547	67268.8	110867	85893.2	82861	110309	77594.2	83382.4	40867.1	75370.9	79362.4	59118	58020.6	63413.2	48867.9	53738	51649.9	43181.2	52112.5	40329.3	67232.5
_AAS[Phospho (STY)]LNYLNQPSAAPLQVSR_.2	172635	NA	153745	236837	349930	170696	123934	199041	115499	108132	141433	225538	324222	394469	256573	235996	675943	306164	197796	247962	187264	125794	141688	170981	332696	490122	193641	227746	467349	237707	392765	294223	275912	381414	261525	301950	138360	259419	252197	192345	197788	216225	156065	188121	154219	129244	150880	138035	234433
_AAS[Phospho (STY)]LPGKN[Deamidation (NQ)]GN[Deamidation (NQ)]PTFAAVTAGYDK_.3	NA	NA	NA	NA	NA	72029.7	67650.3	NA	NA	NA	NA	NA	NA	NA	NA	NA	NA	NA	NA	NA	71350.1	NA	NA	NA	NA	NA	NA	72612.6	NA	NA	95399.1	NA	NA	NA	NA	NA	NA	NA	NA	NA	63904.2	NA	62796.7	NA	NA	NA	NA	NA	NA
_AAS[Phospho (STY)]LPGKN[Deamidation (NQ)]GNPTFAAVTAGYDK_.3	NA	NA	71351.3	NA	NA	82434.7	NA	105715	NA	NA	NA	NA	NA	NA	NA	87857.6	NA	92594.4	NA	91608.3	NA	NA	NA	NA	NA	NA	NA	103990	NA	NA	121802	NA	NA	NA	NA	26713	NA	71808.6	NA	NA	79216.5	NA	80091.6	94353.4	NA	81588.7	111811	107509	80311.9
_AAS[Phospho (STY)]LTEDRDR_.2	2666.37	NA	54197.2	5051.19	2676.63	11082.6	7350.93	7684.56	14134.2	NA	9415.96	31375.7	NA	14679.9	4793.77	NA	9948.82	5163.25	13081	6841.58	24960.8	18222.3	NA	22760.5	2692.96	25769.1	34704.7	20969.4	11574.6	39950.9	22531.4	37624.9	54046	71834.4	24763.7	38291.6	47076.4	29411.9	NA	9553.68	74367.4	31364.7	88004.8	53476.5	56437.3	24062.9	16360.2	63045.1	120564
_AAS[Phospho (STY)]PHQVTPQADEK_.3	NA	NA	13891.9	13915.8	23475.9	20173.2	15811.9	NA	NA	NA	12037.5	NA	20749.1	12452.9	15085.6	NA	20387.5	NA	16149.3	18840.2	14493.9	15390.6	NA	NA	24142.3	19467.7	13071.5	12882.1	12736.2	13861.4	NA	NA	11421.2	14227.1	11607.1	7787.17	12219.5	17914.3	22071.4	23453.4	20193.3	22350.4	19003.1	22505	27468.4	19422.5	NA	22110.1	19316.6
_AAS[Phospho (STY)]PPASASDLIEQ[Deamidation (NQ)]QQK_.3	325458	12880.8	272553	222148	378256	276633	265549	305895	314037	238529	293012	260524	445935	447278	308710	218214	563333	326149	332677	299906	338732	326868	199730	326553	390835	364022	232113	270182	351680	333672	258645	279087	308767	331097	241228	267278	150047	289395	346688	291174	261094	336159	298987	358863	289448	271097	293282	336278	272412
_AAS[Phospho (STY)]PPASASDLIEQQ[Deamidation (NQ)]QK_.2	1.45122e+06	NA	58078.2	1.06261e+06	1.40864e+06	1.13803e+06	1.06443e+06	1316729	1.16172e+06	900750	1.30093e+06	1305927	1.86431e+06	1.73191e+06	1.24612e+06	998440	153689	1.18757e+06	97984.9	1.26621e+06	1.40421e+06	1.23808e+06	912150	1.38578e+06	1.6512e+06	1.44432e+06	71799.3	1.14196e+06	119911	1.22301e+06	1.20013e+06	1.2761e+06	1.21961e+06	1.41586e+06	999734	1.21578e+06	30384.6	78331.5	1.48322e+06	1.28879e+06	1079908	1388042	1247051	106484	1131976	1.09067e+06	1.27279e+06	1.37165e+06	1.32203e+06
_AAS[Phospho (STY)]PPASASDLIEQQQK_.2	1.87062e+06	67628.4	1.324e+06	1.37195e+06	1811391	1.4742e+06	1.37695e+06	1.66801e+06	1497877	1.12591e+06	1.67588e+06	1693694	2.39508e+06	2.28025e+06	1619391	1.28052e+06	2.72705e+06	1.56577e+06	1.8623e+06	1.65787e+06	1.80606e+06	1.60145e+06	1.16198e+06	1.77513e+06	2.1458e+06	1.88068e+06	1.16876e+06	1.48144e+06	1.95223e+06	1.58559e+06	1.53724e+06	1.62455e+06	1.61918e+06	1.85197e+06	1279311	1.55955e+06	898816	1.47211e+06	1.90222e+06	1.63443e+06	1.37755e+06	1.77048e+06	1.58663e+06	1876069	1.4583e+06	1.3964e+06	1.62141e+06	1.71546e+06	1.70142e+06
_AAS[Phospho (STY)]PPRPLLSN[Deamidation (NQ)]ASATPVGR_.3	409866	NA	213167	256582	509851	259472	347393	363511	209512	170926	171400	167815	408100	199229	120982	151969	232975	127715	234553	181709	308869	238812	175615	231942	452396	242280	231116	262196	129311	41241.7	78400.5	65428	97272.9	68785.9	43433.1	62270.7	149612	256973	403076	373781	369629	374162	430683	391493	496977	477658	434862	440144	168478
_AAS[Phospho (STY)]PPRPLLSNASAT[Phospho (STY)]PVGR_.3	NA	NA	NA	NA	NA	NA	NA	NA	NA	NA	NA	NA	NA	NA	NA	NA	NA	NA	NA	NA	NA	NA	NA	NA	NA	NA	NA	NA	NA	NA	NA	NA	NA	NA	NA	NA	NA	NA	NA	NA	54838.7	NA	NA	NA	NA	NA	50928.6	NA	NA
_AAS[Phospho (STY)]PPRPLLSNASATPVGR_.3	521502	NA	315130	296630	649741	380777	541085	549611	265243	214352	220212	243097	465826	255817	155943	195264	300590	167072	298418	275810	444570	335795	224213	250699	548032	365311	257395	329369	171665	NA	102301	89781.8	111704	99374.8	55981.6	53053.9	187022	323598	512857	471121	465926	473710	545911	492536	631290	610500	550378	560918	207837
_AAS[Phospho (STY)]PQ[Deamidation (NQ)]DLAGGYTSSLAC[Carbamidomethyl (C)]HR_.3	81937.2	NA	NA	60204.5	NA	70110.8	72964.5	NA	61684.6	52930	NA	NA	104422	86540.4	60374.2	51855.9	120301	79053.9	71854	75626.9	76583.8	34674.4	NA	NA	NA	76499.1	56004.3	NA	114589	80551.4	73617.6	85470.6	80965	NA	35505.4	NA	37035.9	82400.5	117487	96457.6	79474.5	102836	97214.5	116506	68286.8	81635.1	90689.3	80244.9	81128.2
_AAS[Phospho (STY)]PQDLAGGYTSSLAC[Carbamidomethyl (C)]HR_.3	50406.6	NA	34472.7	35268.1	63767.2	43872.1	39394.8	43939.6	30227.2	28830.6	53307	27092.7	62187.8	59310.2	38925	35490.6	84176.6	44953.4	41459.9	41704.1	40269.4	33171.7	23006.2	35780.5	79645.2	48992.6	35421.1	39685	68679.4	48255.4	50914.8	42166.7	49190.2	NA	28160.1	32299.8	23424.9	54703.4	76674.4	66426.1	54453.7	65765	61216.9	78214.4	43932.7	45385.8	59002.4	54891.5	54962.1
_AAS[Phospho (STY)]PS[Phospho (STY)]PQ[Deamidation (NQ)]SVR_.2	NA	NA	16494.9	NA	NA	20450.8	NA	NA	NA	NA	NA	NA	NA	NA	NA	NA	NA	NA	NA	NA	NA	NA	NA	NA	NA	NA	21654	NA	NA	NA	12044.7	NA	NA	NA	NA	NA	NA	NA	NA	NA	NA	NA	NA	22848.1	NA	NA	39136.8	26146.4	NA
_AAS[Phospho (STY)]PS[Phospho (STY)]PQSVR_.2	116190	86659.8	188268	116929	66373.3	216656	171485	260657	307917	16238.5	314622	207121	123254	170482	141115	15263.8	138564	183247	137301	136676	246763	140283	NA	185130	135406	197648	205931	119468	96199.1	147364	126931	168211	141204	128268	112255	116824	NA	70202.3	268892	219908	126319	145269	242597	349279	434748	285687	569443	495738	140911
_AAS[Phospho (STY)]PS[Phospho (STY)]PQSVRR_.2	NA	NA	28746.1	NA	NA	40289.3	42446.4	NA	70525.2	NA	65588.7	50139.1	NA	43752.9	NA	NA	29971.4	46939.2	39398.1	20541.5	53477.3	53568.4	NA	44193.9	NA	NA	58832.4	NA	16782.1	63298.9	36342.7	NA	30275.2	48765.9	25958.4	24061.1	NA	NA	NA	NA	NA	NA	NA	56616.6	107564	51313.8	97023.9	74606.2	15736.7
_AAS[Phospho (STY)]PSPQ[Deamidation (NQ)]SVR_.2	28069.5	NA	35163.3	25265.8	23907.1	25304.8	23473.1	28557.5	22053.5	NA	25299.2	24142.2	27666.1	51858.8	35162.7	NA	49566.5	26223.9	46714.3	36816.3	30031.7	27971.2	NA	31212.2	39847	44302.4	28505.1	30367.9	50543.9	38841.7	39876.7	45985.8	48547	476834	36148.1	34949.4	22779	23360	NA	28680	25327.8	27313.4	386877	29812.1	401441	174847	171727	18862.3	31643.6
_AAS[Phospho (STY)]PSPQSVR_.2	290661	46614.9	1.08439e+06	419537	269632	523792	462777	535716	492465	15753.8	471037	582300	218511	843077	581279	28202.6	714857	514442	684298	600747	882354	550774	22211.6	666484	315237	1.11904e+06	809554	728417	720100	925547	945850	1.3345e+06	1.3827e+06	1.23944e+06	904553	966573	948598	802442	153449	528660	1.11607e+06	821779	988481	857112	1.00213e+06	456169	452255	649661	1464123
_AAS[Phospho (STY)]PVLLSSNSQK_.2	NA	NA	NA	NA	NA	NA	NA	NA	NA	NA	NA	NA	NA	NA	NA	NA	NA	NA	NA	NA	NA	NA	NA	NA	NA	NA	NA	NA	NA	NA	NA	NA	NA	NA	NA	NA	NA	NA	NA	NA	NA	NA	NA	NA	NA	NA	NA	NA	NA
_AAS[Phospho (STY)]PVLQEDIDIEGVQSEGQDN[Deamidation (NQ)]GAEDSGDTEDELRR_.4	93695.8	NA	53944.1	45844.3	122055	51371	56649.3	77089.7	44129.9	65714.8	55880.8	125279	43332.3	57073.6	47006.3	54501.9	52334.4	42600.9	60581.9	47521.5	42464.9	63648.5	57625.4	71447	59298.2	NA	36185.2	56340.5	94006.7	65442.9	106573	61527.3	63045.2	38550	92043.9	41219.1	NA	55188.9	55625.2	52864.3	108490	53365	81382.5	58741.6	53478.9	42245.8	50136.8	47732.9	61209.1
_AAS[Phospho (STY)]PVLQEDIDIEGVQSEGQDNGAEDSGDTEDELRR_.4	346133	NA	NA	NA	184203	275953	467100	NA	NA	210278	NA	176298	351553	NA	NA	147191	230318	NA	210106	150571	NA	NA	NA	178262	229908	212759	92798.7	NA	212662	138645	218900	162321	225375	255203	142562	195616	NA	137592	NA	NA	263618	175007	155348	NA	166915	339294	330076	127619	158290
_AAS[Phospho (STY)]REEPIEWEF_.2	43352.2	NA	26299.1	28075.4	36380.7	26732.2	25819.8	46239.7	33587.4	29643.5	17991	18449	46200.4	NA	32614.2	23517.9	53673.8	NA	29529.7	24985.7	28921.8	25121.8	37170	20499.4	41798.2	NA	28958.5	27022.7	36480.4	NA	33373.4	NA	49116.6	38538.1	47310.8	50580.8	NA	24653.3	NA	35407.9	23579.5	33033.9	24614.4	28507.1	26806.6	21523.1	39611.4	23379.4	38275.3
_AAS[Phospho (STY)]SAAQGAFQGN_.2	36748.3	NA	38221.3	NA	61341.3	42163.1	34064.9	NA	39861.8	NA	NA	38245.1	50099.5	65163.6	40041.4	NA	108726	51123.8	36031.7	NA	NA	33859.9	25897.6	41191.5	52225.4	100703	51671.3	35261.3	64649.9	51646.2	45862.8	48583.5	72061.8	114604	57757.9	54831	20379.1	26661.8	NA	36803.7	54488.3	55364.8	51709.7	40415.7	NA	40751.3	50409.3	24941.4	34558.7
_AAS[Phospho (STY)]SDQLRDNS[Phospho (STY)]PPPAFKPEPPK_.3	138610	86782.4	140388	108217	99385.7	134561	129770	154387	84906.6	62225.8	96355	NA	144315	126115	123708	108956	66075.1	103849	135169	132339	175960	145934	128717	122385	148833	133318	124470	117985	61069	75505.6	76953	92307.1	40049.9	51648	64199.8	68361.6	19487.1	43937.8	89133.1	69047.6	36659.9	67144.7	48314.9	54409.6	89316.3	80415.6	105418	54400.7	54634.2
_AAS[Phospho (STY)]SPDGFFWTQ[Deamidation (NQ)]GSPK_.2	105748	NA	88354.7	127726	187538	115466	85732.3	129396	88258	81221.1	106342	114420	174986	188193	139860	128648	266938	146820	118605	125659	108221	97543.6	96550.5	105044	163337	201206	114638	148344	205551	123779	156040	155781	117373	151676	117389	110953	48281.1	135043	163034	94462.4	107430	113538	102167	100890	98191.4	94056.1	104496	NA	114800
_AAS[Phospho (STY)]SPDGFFWTQGSPK_.2	167098	17673.1	157303	223730	325829	186844	141189	210537	122546	121823	163539	202767	305097	352832	223069	226371	521121	250227	206359	216732	180047	146312	156896	172333	277980	337741	189273	261085	361537	198227	294674	270419	206804	260980	197765	186870	84774.2	235764	250713	153465	180043	191456	172477	160483	159530	150018	153869	141243	183505
_AAS[Phospho (STY)]TDLGAGETVVGK_.2	199577	NA	120398	103203	173762	132239	127294	131462	117254	122707	63291.6	107310	212044	130501	99310.4	121878	186618	108210	116334	119106	115328	128406	90065.3	136570	212559	104740	104557	139993	142389	139229	120601	128378	113120	114951	89026.5	111238	72195.1	128392	205480	171300	110976	139592	148490	175086	145345	174171	185179	182910	175953
_AASAAAASAAAAS[Phospho (STY)]AASGS[Phospho (STY)]PGPGEGSAGGEK_.3	1.29853e+06	215950	1.12407e+06	1.71623e+06	1759497	1.80417e+06	1.04014e+06	1.84342e+06	1603578	1.36752e+06	1.66098e+06	1.31448e+06	1.20981e+06	1.55683e+06	1.48152e+06	1.66046e+06	1.139e+06	978833	1.80135e+06	1.70789e+06	1.45144e+06	1431196	2.03822e+06	1.89817e+06	1.13127e+06	1.93684e+06	973160	1.74333e+06	1.28782e+06	1.16155e+06	1.7251e+06	1.46524e+06	1.17519e+06	1353547	1377778	1.29797e+06	2179202	2.15087e+06	1.1902e+06	1.24863e+06	1.91823e+06	2.45349e+06	2.29701e+06	1.93937e+06	2.10554e+06	2.05688e+06	1616352	1.89917e+06	2805867
_AASAAGAAGS[Phospho (STY)]AGGSSGAAGAAGGGAGAGTRPGDGGTASAGAAGPGAATK_.4	9675.22	NA	NA	NA	15984.2	NA	NA	NA	NA	8949.18	NA	NA	18527.5	6606.67	NA	NA	13124.2	NA	NA	7098.31	10646.8	NA	NA	NA	11408.3	14752.2	NA	NA	15355.7	7718.56	NA	NA	NA	11095.5	9468.61	NA	6737.36	7340.75	11373.1	5706.81	6438.59	8312.03	NA	8099.04	7825.6	NA	NA	NA	11425.5
_AASADS[Phospho (STY)]TTEGTPADGFTVLSTK_.2	446731	NA	244640	264929	417019	208126	253039	224523	172634	178226	261392	297318	463404	488361	358795	272215	540392	409523	403089	369538	243510	236050	235049	224921	493288	364459	244633	294300	748787	493429	450657	519255	960760	1.20472e+06	823750	963708	203574	317938	293884	265175	266340	319789	215871	216458	210715	161494	200725	174489	283899
_AASADSTTEGT[Phospho (STY)]PADGFTVLSTK_.2	451502	NA	249838	266608	421179	208392	253080	230616	189240	183431	262861	298034	98529.6	489005	359700	273925	124653	410172	403089	373400	248023	239413	240169	230637	496351	56875.1	245561	301642	123585	76843.8	452511	521632	135414	1208077	828888	164199	203644	318396	293884	276014	267588	322043	217386	226631	213098	165885	200919	183184	285943
_AASDPLLSSVS[Phospho (STY)]PAVSK_.2	NA	NA	NA	NA	NA	NA	NA	NA	NA	NA	NA	NA	86465.8	82587	58635.9	NA	139125	48941.9	NA	NA	NA	NA	NA	NA	NA	58516.6	NA	NA	87124	NA	NA	NA	NA	NA	NA	NA	34077.1	55144.3	NA	NA	39114.5	50219.8	NA	NA	55708	NA	NA	NA	NA
_AASEDMTS[Phospho (STY)]DEER_.2	NA	NA	NA	NA	NA	NA	NA	NA	NA	NA	NA	NA	NA	NA	NA	NA	NA	NA	NA	NA	NA	NA	NA	NA	NA	26700.4	NA	NA	NA	NA	NA	NA	NA	NA	NA	NA	NA	NA	NA	NA	NA	NA	NA	NA	NA	NA	NA	NA	NA
_AASENS[Phospho (STY)]QDALR_.2	NA	NA	NA	NA	NA	NA	NA	NA	NA	NA	NA	NA	NA	NA	NA	NA	NA	NA	NA	NA	NA	NA	NA	NA	NA	NA	NA	NA	NA	NA	NA	NA	NA	NA	NA	NA	10060.9	NA	NA	NA	NA	NA	NA	NA	NA	NA	NA	NA	15602.6
_AASGEDST[Phospho (STY)]EEALAAAAAPWEGGPVPGVDR_.3	86442.9	NA	58426.8	67018.7	48148.8	43827.6	50014.9	72396.8	70295	66673.6	60105.8	58147.1	56788.6	184515	117727	45056.1	74554.8	46460.4	41349.5	53453.8	45940	46300.7	47410.1	38367.8	74802.8	60708.9	51708.7	48885.7	41816.8	32344.5	28354.7	37483.2	40436.8	48743.1	48600.2	49755.4	8110.84	45703.9	86097.1	76995.5	32605.7	23919.2	30381.4	35642.3	32500.6	37261.7	62757.2	54389.5	57635
_AASGWSPSWPNDGDLS[Phospho (STY)]D_.2	NA	NA	67088.8	68175.4	71158.4	54690.9	67264	67381	55173	54460.2	86346	59976.6	262043	405546	338148	255045	352240	407158	304586	291561	282050	281157	238510	264065	NA	NA	70775.3	67064.3	106054	153749	159134	136388	118538	161257	161868	136307	NA	NA	NA	NA	35923	34547.6	38127.5	59476.1	NA	27123.5	51997.5	41597.8	77715.5
_AASIENVLQDSS[Phospho (STY)]PEHC[Carbamidomethyl (C)]GR_.3	40787	NA	30610.5	41252.5	47525.5	33883.5	33935.2	38981.1	34668.6	29195.6	NA	28742.9	48696.8	40540	21512.1	35440.7	46742	28377.2	25719.5	28212.5	35321.2	29588.5	26486.3	29300.6	46321	36646.1	26727.5	33343.2	36411.2	33225.8	30451.2	29963.6	35929	34468.9	NA	NA	14413.3	41485.5	74346.2	53539.1	41730.1	52144.8	53518.7	61700.3	48978.1	53744.1	47967.5	47714.8	40684
_AASLQVPRPS[Phospho (STY)]PGHHHPPAVK_.4	NA	NA	NA	NA	23088.4	NA	NA	NA	NA	NA	NA	NA	NA	NA	NA	NA	NA	NA	NA	NA	NA	NA	NA	NA	21457.1	NA	NA	NA	21680.5	NA	NA	NA	NA	NA	NA	NA	NA	NA	NA	NA	NA	NA	NA	NA	NA	NA	NA	NA	NA
_AASS[Phospho (STY)]PDGFFWTQGSPK_.3	20525	NA	18111.5	23874.3	44346.9	21949.4	17046.3	18946.9	14753	16531.3	17048.1	17708.6	42211.7	49259.7	26966	19092.2	73160	34088.7	19387.9	18289.2	22168.5	17787.1	13867.4	15402.7	31457.8	43870.3	22168.7	23753.5	47892	29701.4	31283	23666.3	27362.4	33475.2	17031.3	20150.4	10809.9	30605.6	32545.2	23399	17213.1	29472.4	16412.6	19725.1	18359.6	16573.8	17631.7	15866.6	18335.8
_AASS[Phospho (STY)]PSNPAALPVASDSSPMGSK_.2	75242.5	NA	NA	58282.2	77431.5	49047.2	50332.4	61759.1	62995	59193.5	67412.2	82981.4	112351	95279.8	70730.8	59275.7	128854	67436.3	72238.7	72544.7	73768	NA	53689.2	73275	112302	69243	NA	59450.9	91040.2	69706.4	63934.8	74406.5	56592.6	55844	45094.1	54440.9	24375.2	64970.3	118868	86641.3	56402.8	86310.8	81101.6	93058.7	76672.4	80830.9	96159	126405	86335.4
_AASSDQLRDNS[Phospho (STY)]PPPAFKPEPPK_.4	NA	NA	NA	NA	NA	NA	NA	NA	NA	NA	NA	NA	NA	53271.3	NA	NA	81027	NA	NA	NA	40355.5	42537.5	NA	38088.6	NA	NA	NA	NA	NA	NA	NA	NA	NA	NA	NA	NA	NA	NA	NA	NA	NA	NA	18474.3	NA	NA	NA	NA	NA	NA
_AASSLNLS[Phospho (STY)]N[Deamidation (NQ)]GETESVK_.2	171813	NA	47991.1	NA	52265.8	46978.5	160112	55596.6	52677.8	307129	165962	128311	NA	165743	34960.1	145915	143736	NA	125869	134275	NA	34430.2	157060	NA	138631	37199.8	NA	130508	NA	NA	NA	NA	NA	NA	NA	21792.1	12465.4	41743.7	57750	50111.2	107298	39226.8	164285	47408	66057.8	180397	70337.3	177612	30947.6
_AASSLNLS[Phospho (STY)]NGETESVK_.2	52075.9	NA	NA	NA	57823.1	NA	59837.3	NA	117875	NA	NA	45973.3	NA	85569.7	NA	NA	NA	NA	NA	NA	NA	97459.5	63145.8	96605.5	99053.6	85476.9	91232.1	NA	NA	NA	NA	NA	NA	NA	NA	NA	15199.1	55630.7	NA	54519.9	60675.2	60767.8	50603.7	52309.2	104961	69952.7	78852.2	120720	46932
_AASSSSPGS[Phospho (STY)]PVASSPSR_.2	34207.5	NA	19037.4	18739.5	25497.8	24137	30361.6	32635.4	NA	19107.5	22496	25073	40979.2	38029	31497.5	16255.5	31354.8	19356.6	23650.4	17059	26789.3	34286	17392.3	44045.2	27947.9	NA	13402.4	10903.5	NA	NA	16806.6	16241.2	26735.5	36224.3	33359.7	38589	6975.67	4727.52	NA	NA	10216	NA	NA	18846.5	NA	17689.1	29134	30930.2	15379.1
_AASSTSQSGLSNSSHNC[Carbamidomethyl (C)]SNKPS[Phospho (STY)]IGK_.3	14031.5	4712.99	NA	NA	15782.7	12990	17627.1	23994	NA	NA	NA	NA	17801.3	25457.6	NA	12855	30435.6	16453.1	9911.45	19995.5	20312.5	16667.2	14132.7	NA	16919.8	19240.8	11128.9	11004.3	13939.4	12783.7	10245.3	10703.9	7140.04	NA	7934.38	7246.78	5170.56	9553.84	39103	21445.3	12869.5	10789.9	13237.2	16183.3	12298.6	19134.4	27089.6	NA	21570.8
_AAT[Phospho (STY)]PLPSLR_.2	275692	NA	95361.9	146956	302199	NA	123144	172259	156540	NA	NA	205460	353440	191111	116053	111606	422464	178120	153343	179833	173065	NA	87156.2	155557	325419	NA	122089	140602	315891	253243	155067	165487	171325	204607	107569	146745	NA	NA	257670	NA	184825	255958	242464	242138	97129.8	157901	NA	267344	142000
_AATAARPPAPPPAPQ[Deamidation (NQ)]PPS[Phospho (STY)]PT[Phospho (STY)]PSPPRPTLAR_.3	1.27231e+06	525545	1.19714e+06	1.17173e+06	1.08868e+06	1.25908e+06	1.18646e+06	1.38382e+06	1.20494e+06	1.0157e+06	1260702	1.00742e+06	1.84096e+06	1.86032e+06	1.47446e+06	1309725	1.79262e+06	1266423	1.54915e+06	1424363	2.04109e+06	1.25598e+06	1.31248e+06	1.30958e+06	1.35004e+06	1.68037e+06	892966	1.11341e+06	998487	972249	1.39432e+06	1.22805e+06	868706	1.29111e+06	839766	1.09416e+06	112704	491176	1503682	1.31172e+06	803212	986710	842111	1.26355e+06	1.39962e+06	1.24019e+06	1.80699e+06	1.21045e+06	1.19585e+06
_AATAARPPAPPPAPQ[Deamidation (NQ)]PPS[Phospho (STY)]PTPS[Phospho (STY)]PPRPTLAR_.4	4.05712e+06	2938233	4.0698e+06	3.80279e+06	3.49498e+06	4658758	3.98136e+06	4570699	4.65034e+06	3.74084e+06	4.04526e+06	3.0909e+06	6.13588e+06	6.22421e+06	5045019	4284314	5865400	4.62462e+06	5.07199e+06	4.63669e+06	7039044	4283436	4.09843e+06	3992719	4390387	6441937	3.01441e+06	3.70369e+06	3.33393e+06	3.62951e+06	4.60278e+06	4.02357e+06	3.34318e+06	4.0455e+06	2.84905e+06	3.42193e+06	508406	2.14187e+06	4993942	4676674	2940424	3.88255e+06	3131834	4.74959e+06	5152812	4400745	6267233	4439089	3.93051e+06
_AATAARPPAPPPAPQ[Deamidation (NQ)]PPS[Phospho (STY)]PTPSPPRPTLAR_.3	30300.4	NA	NA	NA	40912	NA	23526.7	30405.7	17565.3	NA	NA	NA	66464.8	47753.3	29687.1	29466.4	69598.6	NA	29080.4	34566.9	25900.4	16574.2	NA	37075.5	43006.4	25759.5	NA	NA	38881.8	18604.5	30404	24887.2	29922.8	47016.5	NA	32426.3	NA	NA	NA	NA	NA	15189.6	24045.9	NA	NA	NA	NA	23749.3	30970
_AATAARPPAPPPAPQ[Deamidation (NQ)]PPSPTPS[Phospho (STY)]PPRPTLAR_.4	208907	6845.62	65551.2	55551.1	136089	54514.9	78148	78050.9	55499.1	190380	196298	232050	210804	111000	97928.4	253519	244934	94353.5	145739	120349	72727.7	97013.3	60881.6	105616	319024	56591.2	143717	62084.1	186981	92986.9	252160	207269	253708	121600	158216	90306.1	23756.4	128815	306155	201297	177060	67797.4	88462.6	89060.1	195055	193874	210226	283116	266557
_AATAARPPAPPPAPQPPS[Phospho (STY)]PTPS[Phospho (STY)]PPRPTLAR_.4	4.05712e+06	2.93796e+06	4.06594e+06	3.81371e+06	3.49498e+06	4664288	3.98178e+06	4571357	4649915	3.75987e+06	4.04996e+06	3.10271e+06	6134089	6.22423e+06	5.04449e+06	4.27939e+06	5.86001e+06	4.62462e+06	5.06062e+06	4.63669e+06	7045924	4287246	4094538	3.98774e+06	4403984	6442873	3.01605e+06	3.69445e+06	3.33393e+06	3628170	4605599	4031206	3.34832e+06	4046697	2.85466e+06	3.41663e+06	507969	2.13874e+06	4991681	4.68154e+06	2939587	3.88038e+06	3.14427e+06	4.74823e+06	5158453	4.40523e+06	6275089	4450444	3.92521e+06
_AATAARPPAPPPAPQPPS[Phospho (STY)]PTPSPPRPTLAR_.4	298124	6360.9	191953	198778	337872	171849	199664	260836	195538	189207	197603	232332	532513	356619	274745	254100	565983	291322	282824	287301	243206	208751	201477	297769	321185	234457	144003	173269	371232	240804	252317	208604	254577	319673	157670	272724	46179	128815	306155	201386	177098	189053	234261	206094	194258	195622	213126	285618	264796
_AATAARPPAPPPAPQPPSPT[Phospho (STY)]PS[Phospho (STY)]PPRPTLAR_.3	1.37029e+06	595664	1.28537e+06	1.27308e+06	1167884	1.36463e+06	1277451	1.47086e+06	1.29096e+06	1085036	1.33785e+06	1.07581e+06	1.92571e+06	1.96852e+06	1.56563e+06	1.4128e+06	1.9129e+06	1.36742e+06	1.66892e+06	1.52796e+06	2.13944e+06	1.34167e+06	1.41777e+06	1.40038e+06	1.4477e+06	1.82436e+06	962934	1.1959e+06	1.08132e+06	1.04443e+06	1.50793e+06	1.32106e+06	951618	1396398	928570	1.18494e+06	131174	548373	1.57501e+06	1.41035e+06	894697	1.08863e+06	920377	1.37001e+06	1.4922e+06	1.33075e+06	1.92307e+06	1.29298e+06	1.32458e+06
_AATAARPPAPPPAPQPPSPTPS[Phospho (STY)]PPRPTLAR_.4	210560	5312.75	67402.6	56631	135167	57674.3	81254.9	77551.9	59237.4	57162	51365	80214.8	206673	113597	96948.5	75357.3	242456	95744.2	148037	121545	74461.6	94876.6	62310.2	108940	163073	59291.3	121384	63896.2	186682	89976.8	68396.8	73214.2	219391	130682	133671	94267.7	25017.8	113874	82461.4	60782.4	156413	71854.3	87740.5	94441.9	162509	170180	179782	78285.3	229666
_AATTATPAATTS[Phospho (STY)]PK_.2	144051	NA	103347	112232	160117	129010	149809	160620	146428	NA	119891	115118	127019	99616.7	87978.5	NA	NA	NA	79134.9	90733.7	113582	92454.6	NA	113550	171510	143334	105411	124827	137870	107081	90126.2	123602	63391.5	69697.5	50890.2	53524.2	43631.7	74177.9	98991.6	102378	87914.3	83715.6	105156	112565	143867	100606	134764	130432	92741.6
_AAVAWEAGKPLS[Phospho (STY)]IEEIEVAPPK_.3	NA	NA	NA	NA	15878.2	NA	NA	NA	NA	NA	NA	NA	NA	NA	NA	NA	NA	NA	NA	NA	NA	NA	NA	NA	NA	NA	NA	NA	14625.7	NA	NA	NA	15283.1	19865.1	9476.22	15901.8	NA	NA	NA	NA	NA	NA	NA	NA	NA	NA	NA	NA	NA
_AAVGQ[Deamidation (NQ)]ES[Phospho (STY)]PGGLEAGNAK_.2	404340	NA	332837	273900	487342	387740	432006	416012	413202	336987	375032	381752	555742	394068	304696	253089	442510	346187	368681	364978	483121	393050	314759	407352	359427	436060	258493	303619	335803	284199	285709	285605	284129	327941	231913	237891	149662	262327	443812	359433	263684	356109	375230	396778	439396	390196	525024	540077	307621
_AAVGQES[Phospho (STY)]PGGLEAGN[Deamidation (NQ)]AK_.2	100339	NA	83480.8	NA	99271	82918.2	109221	117617	104241	64900.9	122008	102332	118856	115111	NA	NA	NA	92494.8	NA	NA	136995	NA	92169.5	104384	105812	83801.7	NA	80855.1	NA	NA	79552.1	88387.4	67438.6	86331	54749.3	57214.3	15317.8	45192.4	101405	76308.7	49731.7	62912.8	86240.9	92062.6	82886.8	78934.6	119829	108107	64382.2
_AAVGQES[Phospho (STY)]PGGLEAGNAK_.2	418970	31999.9	344567	268610	470812	389212	416449	407599	407819	334326	362506	371014	537696	412196	309807	249528	441352	362496	378520	356989	465424	378918	304270	409351	369903	425846	268730	297811	353989	303185	294497	314833	278452	319785	218086	256172	145315	254683	435282	356323	251770	340342	375002	380519	422763	380895	503237	519626	293611
_AAVGVSMAHFSVSDALMS[Phospho (STY)]PPPK_.3	NA	NA	NA	NA	NA	37243.3	45020.8	58573	NA	52387	NA	51429.2	32820.6	NA	NA	NA	64385.5	NA	NA	NA	NA	51835.2	NA	65860.5	NA	NA	NA	NA	NA	NA	NA	NA	NA	57303.5	40379.3	52139.6	5047.04	NA	NA	NA	NA	NA	NA	NA	NA	NA	34661.3	53032.1	26789.9
_AAVLS[Phospho (STY)]DS[Phospho (STY)]EDEEK_.2	632736	187788	811688	683150	578434	840314	775802	854059	1085288	594652	887154	716958	628823	772812	731690	519667	675239	721869	827854	691230	975812	771965	477102	751728	676015	304709	725604	653970	514387	689288	754600	646673	543323	472738	495183	491098	NA	240291	1.28063e+06	1.21467e+06	643567	614179	775666	1.27e+06	952835	1.30905e+06	1.77731e+06	1.22656e+06	503525
_AAVLS[Phospho (STY)]DSEDEEK_.2	53150.7	NA	29811.4	28987.1	54544.8	28812.4	38291.1	39936.5	32819.4	30262.1	35597.1	39502.8	48886.7	44842.8	35904.3	28795.9	57157.1	38606.5	50639.8	43034.6	36871.8	41639.7	22096.3	36337.5	50571.5	27143.5	30698.2	38695.8	55938.5	41384.2	35060.6	47479.2	51005.5	59046.9	38478.8	45860.9	6143.64	36404.2	48350.1	42784.6	34743.4	42225.1	56688.5	42405.8	34926.8	35607	40543.7	40394.5	42314.6
_AAVLSDS[Phospho (STY)]EDEEK_.2	101490	NA	76039.4	85118.1	127671	75677.3	NA	86359	86080.1	52656.9	106017	110751	124247	96007.7	74431.3	NA	137769	79925.6	93393.4	89499.6	84574.3	66483.8	51241.5	79268.7	108806	94305.4	66775.2	NA	125844	85690.5	88256.1	102219	117707	114282	86659.2	100181	NA	82754.2	108676	105081	99159.1	82546.9	124630	107995	100778	107624	108925	103259	97555.3
_AAVPS[Phospho (STY)]GASTGIYEALELR_.3	7819.71	NA	7264.5	4486.99	5964.26	4193.75	8267.03	12263	6477.26	6324.63	NA	7656.4	7108.29	4483.39	6442.9	3803.56	7161.58	4022.37	3353.53	4183.45	NA	2465.4	NA	NA	6507.52	4025.99	4512.13	4375.02	6473.37	NA	3903.58	NA	NA	12531	NA	5480.45	NA	5096.52	NA	13148.3	NA	NA	2309.99	NA	1064.64	NA	3173.53	6497.21	1844.88
_AAVPSGAS[Phospho (STY)]TGIYEALELR_.3	5244.83	NA	4731.04	2533.09	11899.8	2332.55	4180.47	9361.49	4213.42	4185.17	NA	4559.87	12515.9	2687.2	4315.6	2262.52	13058.1	8913	1693.71	5580.63	NA	NA	1874.15	6028.96	12165.2	6701.89	NA	6989.5	13726.6	NA	2237.3	NA	8738.82	2047.99	1387.95	7055.16	NA	3509.02	NA	1970.75	NA	NA	4236.08	1267.34	NA	NA	1824.8	NA	3143.25
_AAVPSGASTGIY[Phospho (STY)]EALELR_.2	267972	NA	131162	173305	247778	115398	127606	193370	92803.2	144963	122543	126539	361933	222564	207793	220150	254944	170222	248578	296893	165920	144674	195588	193105	212826	116337	94900.7	165172	289672	118360	184530	174853	237762	197410	194642	251831	42338.8	58497.4	127802	93174	87834.2	76831.8	76461.4	72782.8	60944.5	NA	NA	63352.1	78087.9
_AAVPSGASTGIY[Phospho (STY)]EALELRDN[Deamidation (NQ)]DK_.3	NA	NA	NA	NA	NA	NA	NA	NA	NA	NA	NA	NA	NA	215962	NA	NA	NA	160105	116718	NA	NA	NA	NA	NA	NA	NA	87745.9	NA	NA	148818	NA	170250	NA	NA	NA	NA	NA	NA	NA	NA	NA	NA	NA	NA	NA	NA	NA	NA	NA
_AAVPSGASTGIY[Phospho (STY)]EALELRDNDK_.3	79712.1	NA	61549.4	66991.8	89128.1	71659.9	66502.9	85279.7	55137.6	62705.4	71012.5	104303	117647	150810	110384	115615	189407	131487	102622	106607	87890.2	94386.3	84518	126992	92819.8	75503.9	72163.1	71274.5	98633	94822.4	73796.8	71769.2	58474.8	103238	75579.3	82764.5	NA	27020.2	56478.3	33824.9	NA	33374.9	34449.2	44318.2	42373.5	34047.7	39537	44312.6	27542.9
_AAVQELS[Phospho (STY)]S[Phospho (STY)]SILAGEDPEER_.3	NA	NA	64129.6	NA	NA	NA	NA	NA	NA	NA	NA	NA	NA	NA	40229.8	NA	NA	NA	NA	NA	NA	NA	NA	NA	NA	NA	NA	NA	NA	NA	NA	NA	NA	NA	NA	NA	NA	NA	135931	NA	NA	NA	NA	NA	102689	NA	NA	NA	NA
_AAVQELS[Phospho (STY)]SSILAGEDPEER_.3	149602	NA	95727.4	110097	220981	125735	126211	160500	115111	91851.5	107519	113040	199436	164807	103484	89172.3	245349	120095	112314	115591	132529	95202.4	84896.6	110380	216911	180172	89796.4	117043	167941	99273.4	96563.3	83993.2	93184.7	98568.6	61082	75182.6	48042.1	174826	185394	174383	190632	197411	165148	175517	210208	183462	212989	166306	116638
_AAVQELSS[Phospho (STY)]S[Phospho (STY)]ILAGEDPEER_.3	109836	33607.9	106028	103429	80745	110442	81178.6	91403.9	117013	97679.2	129058	94950.6	79598.6	86972.3	67826.8	77605	111326	84413	78016	68638.7	88517.6	70298.5	74015.8	64387.5	134248	122524	97276.4	117353	62525.9	77075.8	65481.5	NA	60289.6	57919	66898.3	NA	NA	101299	190092	185269	126306	148234	128768	161104	147895	163133	218111	156702	NA
_AAVQELSSS[Phospho (STY)]ILAGEDPEER_.2	130038	NA	111170	130610	184516	133258	117689	147077	121608	89013.1	102692	103897	163265	133255	95999.5	83283.5	176868	134440	127717	115856	146655	94509.8	94499.4	118679	150172	130357	92970.1	123622	145969	89533	104280	95277.9	82777.6	95379.5	70069.9	82220.5	33960	115224	143051	140161	132380	147936	147884	122822	164665	146695	168889	124384	85556
_AAVVTS[Phospho (STY)]PPPTTAPHK_.3	301615	NA	105402	95679.3	388564	166773	189569	233946	176087	190840	154431	167527	432436	335506	235351	125077	401110	131309	127458	120733	204282	215259	131144	328065	184637	72381.6	58804.4	53838	227147	105580	118116	146089	257094	223169	178999	203201	184509	257137	375549	306286	180472	187895	259754	249933	187851	232032	382626	357620	328543
_AAYGDLS[Phospho (STY)]S[Phospho (STY)]EEEEENEPESLGVVYK_.3	111946	39803.3	353339	200365	117869	189030	270484	236560	409964	493547	272779	175202	148566	109108	322071	333203	45710.3	199661	193217	232451	394212	312428	364688	136979	122622	NA	259194	241156	69267.2	81069.7	161591	175708	95149.6	NA	96787.4	117512	NA	NA	522055	366716	67592.6	NA	162924	355184	179144	366284	441865	471429	NA
_AC[Carbamidomethyl (C)]AS[Phospho (STY)]PSAQVEGS[Phospho (STY)]PVAGSDGSQPAVK_.3	88743.8	87399.8	66955.5	81013.3	86576.8	103975	89887.2	103315	106172	68000.9	88030.7	58013.7	77583.8	89016.3	58167.8	54768.8	72135	57477.1	72981.9	58882.1	88965.2	70667.5	64969	57942.6	88295.7	141782	77597	72474.5	76750.9	69903.4	77433.1	66475.5	57088.7	73446.8	49072.7	42668.9	17910.4	64974.7	87267.4	85766.2	71501	75425.3	72222.6	88169.5	104208	84882.4	115239	63131.8	54188.5
_AC[Carbamidomethyl (C)]AS[Phospho (STY)]PSAQVEGSPVAGSDGSQPAVK_.3	456016	32401.2	284484	300405	384225	228646	248478	320421	301435	239076	336162	278562	418425	385065	300809	235468	443170	264095	246744	283074	226470	202217	209400	197516	486623	449347	298533	262226	497456	355482	356194	366088	370221	389433	299805	279632	146344	282639	337500	311336	241397	275575	256561	279460	183360	189523	223397	225911	252712
_AC[Carbamidomethyl (C)]ASPSAQVEGS[Phospho (STY)]PVAGSDGSQPAVK_.3	393048	16850.4	246086	262050	331339	199888	203591	268876	261064	203980	286750	237720	361288	262631	231452	202264	381434	221769	197494	242977	151405	NA	181875	164867	420285	93942.1	117856	221642	NA	111929	278500	316564	81422.8	89381	258842	236851	20498.9	44523.1	271876	267921	47364.7	208165	221217	66237	61687.8	82754.1	196637	98945.5	39821.4
_AC[Carbamidomethyl (C)]IS[Phospho (STY)]PKPQKPWDK_.3	NA	NA	NA	NA	5244.18	NA	NA	NA	NA	NA	2504.35	NA	NA	NA	NA	NA	8053.36	NA	NA	NA	4057.24	NA	NA	NA	NA	NA	NA	NA	NA	NA	NA	NA	1181.17	NA	NA	NA	NA	NA	NA	NA	NA	NA	NA	NA	NA	NA	NA	NA	NA
_AC[Carbamidomethyl (C)]LMSLDITEHELQILEQQS[Phospho (STY)]QEEYLSDIAYK_.4	NA	NA	NA	NA	NA	121160	NA	NA	NA	NA	NA	NA	NA	NA	NA	NA	NA	NA	NA	NA	NA	NA	NA	NA	166482	NA	NA	NA	233292	NA	NA	NA	NA	NA	NA	NA	NA	NA	NA	NA	NA	NA	NA	NA	NA	NA	NA	NA	NA
_AC[Carbamidomethyl (C)]PEEPAAPS[Phospho (STY)]PEPR_.2	305917	NA	218937	190845	420588	209549	269324	341864	266988	189723	274938	232407	530817	368311	265044	201163	577065	249029	318813	349282	338069	257560	253374	261876	316525	253309	198113	192811	326001	187134	213195	231377	227603	274568	182491	188360	27700.5	58783.7	143787	118582	68017.6	71405.3	148471	187279	99721.9	78225.2	151999	179222	212652
_AC[Carbamidomethyl (C)]RPPGS[Phospho (STY)]PGRAPPPTPAPSGC[Carbamidomethyl (C)]DPR_.3	68349.8	NA	NA	42312.8	84932.9	46128.6	NA	77908.5	NA	NA	48251.3	51667.4	79837	100638	NA	NA	139469	NA	NA	46646.5	NA	49544.4	NA	NA	51859.4	48343.5	44153.5	NA	51281.9	NA	NA	NA	31580.6	43720.1	NA	NA	7583.21	30126.8	58386.2	NA	35928.7	36182.5	45230	46901.5	NA	NA	37519.3	51878	28827.1
_AC[Carbamidomethyl (C)]S[Phospho (STY)]PC[Carbamidomethyl (C)]SSQ[Deamidation (NQ)]SSSSGIC[Carbamidomethyl (C)]TDFWDLLVK_.3	NA	NA	NA	NA	NA	NA	NA	NA	NA	NA	NA	NA	NA	57295.7	NA	52314.2	NA	NA	NA	NA	NA	NA	49879.8	NA	NA	NA	NA	NA	NA	NA	NA	NA	49910.9	NA	NA	NA	NA	NA	NA	NA	59459.8	NA	61523.8	NA	NA	50540.8	NA	NA	NA
_AC[Carbamidomethyl (C)]S[Phospho (STY)]PC[Carbamidomethyl (C)]SSQSSSSGIC[Carbamidomethyl (C)]TDFWDLLVK_.3	NA	NA	NA	NA	NA	NA	NA	NA	NA	NA	NA	NA	NA	77129.2	NA	40464.2	NA	NA	NA	NA	NA	NA	NA	NA	NA	NA	NA	NA	NA	NA	NA	NA	NA	NA	NA	NA	NA	NA	NA	NA	54172.5	NA	34107.1	NA	18078.1	64324.4	NA	NA	NA
_AC[Carbamidomethyl (C)]SMPQELPQS[Phospho (STY)]PR_.2	NA	NA	NA	23461.2	53321.9	44229.7	37734.6	59346.1	24804.4	27860.1	NA	31458	58493.7	75724.6	48269.2	35756.9	57921.6	35064.6	41882.8	36339.5	39926.6	44866.5	37068.4	41661.4	NA	NA	NA	NA	17982	16057.1	32720.3	39112	49877.3	32955.6	49271.7	66343.4	10780.8	NA	56665.3	29056.5	21451.3	28976.2	33634.7	38992.1	NA	33682.4	45049.4	44904.9	23060.4
_ADAASSLTVDVT[Phospho (STY)]PPTAK_.2	213877	NA	NA	NA	337355	134616	241264	218407	NA	178139	NA	150779	304809	213929	NA	NA	239433	NA	NA	182728	217242	193804	209397	223299	317057	NA	55556.7	181785	250378	185797	181179	NA	NA	176998	NA	176983	92322.1	NA	195673	NA	127451	NA	208043	NA	NA	205583	154049	267155	145987
_ADADPSPTS[Phospho (STY)]PPTAR_.2	NA	NA	47591.6	40935.6	53582.2	43019.2	52084	65709.1	42035.6	NA	42541.9	38122.8	58654.1	53577.4	48953.7	32798.6	54500.3	33729.4	44498.7	46380.3	52096.7	35626	30271.4	50295.6	NA	51530.6	NA	43524.7	53047	24155.7	NA	22219.8	29398.5	34330.8	NA	33598.1	23747	34432.8	NA	40714.4	36792.7	44216.4	48476.3	51468.6	26271.7	35835.3	55549.1	45849.2	39566.3
_ADAPDAGAQ[Deamidation (NQ)]S[Phospho (STY)]DSELPSYHQNDVSLDR_.3	1473184	107318	1.33305e+06	1372293	1.59767e+06	1.51366e+06	1.39098e+06	1.58064e+06	1490433	1.28595e+06	1.38643e+06	1.34721e+06	1.90283e+06	1.93179e+06	1412156	1.26639e+06	1.87932e+06	1340759	1.7354e+06	1.47559e+06	2.06658e+06	1573427	1.32062e+06	1.63515e+06	1.90283e+06	1.71134e+06	1.32605e+06	1369734	1.51397e+06	1.36283e+06	1.59126e+06	1.68714e+06	1.10963e+06	1.10433e+06	917958	935450	351294	1.68086e+06	2.58278e+06	1.75601e+06	1.58809e+06	1.7845e+06	1.76069e+06	1.95429e+06	1.95304e+06	2.06056e+06	2.13102e+06	1.88241e+06	1.54179e+06
_ADAPDAGAQS[Phospho (STY)]DSELPSYHQNDVSLDR_.3	843390	64364.2	792877	789895	942421	880438	791775	939383	885097	757541	806455	773040	1125315	1.12854e+06	830006	753296	1.07806e+06	781213	992836	846724	1.23922e+06	931912	781188	966607	1.08576e+06	1.00393e+06	769523	788146	877185	800859	936399	1.01419e+06	648848	650942	538965	538654	205863	975067	1496034	1.03033e+06	904262	1.01486e+06	995032	1.11211e+06	1.10192e+06	1161407	1.22261e+06	1.1194e+06	888768
_ADDADEFGYS[Phospho (STY)]R_.2	42657.5	NA	42070.7	33757.7	48410.2	32637.9	30807.3	46229.5	44483.3	26484.5	26699.5	22418.1	59136	56303.3	45168	37271.1	49203.3	33491.5	34839.4	40688.4	59045.8	34281.7	30985.9	32855	65795.7	56275.3	32480.4	36641.6	45730.2	44835.1	33065.8	34599.2	60243.7	47648.4	33117.7	36914.7	4186.05	51326.2	73519.1	62928.5	28104.7	57812.8	55658.4	84199.8	57325.8	44813.3	59764.8	56207.2	46132.3
_ADDFPVRDDPS[Phospho (STY)]DVT[Phospho (STY)]DEDEGPAEPPPPPK_.3	590722	86458.8	538193	529390	574854	704621	545703	546077	831855	638628	656662	436740	701600	686253	566962	507406	390847	499690	485734	518001	867755	595044	496257	513068	886445	271316	450039	592360	481167	474695	650508	634088	663289	269687	430877	391152	NA	328797	2.10636e+06	2.00247e+06	1.28083e+06	1.08582e+06	1.28242e+06	1790824	1.87711e+06	1.89719e+06	2.89833e+06	1979732	860921
_ADDFPVRDDPS[Phospho (STY)]DVTDEDEGPAEPPPPPK_.3	54423.6	NA	NA	NA	42889	NA	38864.4	NA	NA	NA	NA	NA	52742.8	NA	NA	NA	68278.4	NA	48739.8	35083.8	36925.9	47318.6	95645.8	40219.5	181314	NA	NA	NA	60886.2	57467.7	31322.6	28713.2	41724.4	43137.2	110869	30617.2	NA	46252.4	101367	69506.3	57853.7	72969.8	94750.4	92917	87539	60397.5	83140.5	93329.4	84393.7
_ADDFPVRDDPSDVT[Phospho (STY)]DEDEGPAEPPPPPK_.3	54423.6	NA	NA	NA	42889	NA	145421	NA	NA	NA	NA	37335.9	52742.8	38658.5	119333	NA	68278.3	NA	48739.8	NA	36926	47318.6	95645.8	40219.5	181314	NA	NA	NA	60886.2	57467.7	31322.5	28713.2	195551	43723.2	110869	30617.1	NA	46252.4	266190	69506.3	57853.7	182456	94750.4	92917	85802.5	60397.5	223877	93329.4	84393.2
_ADEAS[Phospho (STY)]ELAC[Carbamidomethyl (C)]PT[Phospho (STY)]PK_.2	NA	NA	NA	NA	NA	NA	NA	NA	NA	NA	NA	NA	NA	NA	NA	NA	NA	NA	NA	NA	NA	NA	NA	NA	NA	NA	NA	NA	NA	NA	NA	NA	102387	NA	NA	NA	NA	NA	NA	NA	NA	NA	NA	NA	NA	NA	NA	NA	NA
_ADEASELAC[Carbamidomethyl (C)]PT[Phospho (STY)]PK_.2	439566	NA	191541	206241	408933	163582	195910	243245	180387	169657	166747	174211	474502	348254	220760	158782	392971	153527	144913	167955	159163	118346	99731.3	145797	462912	259731	179330	166041	340908	141440	161184	151301	140955	161367	107334	118818	164492	226356	287554	236189	170164	192097	202592	247455	134503	130273	186042	234823	171860
_ADEASELAC[Carbamidomethyl (C)]PT[Phospho (STY)]PKEDGLAQQQTQLNLR_.3	133753	5542.92	67978.7	73621.3	122427	57465.5	65804.1	81116.2	76696	80106.3	77573.3	78837.8	134064	138638	77654	70546.7	176474	52403.6	43520.3	58765.8	49455.9	44460.5	44206.1	53862.1	155864	101832	64747.4	58031.5	112533	45122	36087	35193.6	32313.7	41458.3	24310.5	26619	23386.6	79721	95997.2	60272.9	52709.5	59549.5	79578.7	76898.8	51399.1	50955.3	61279.5	93197.4	44812.1
_ADEESDSQMS[Phospho (STY)]PSHSSTDDHSNWFIIGSK_.3	69244.7	NA	37696.7	52807.7	59181.5	41925.4	42789.7	52915.6	52816.5	45817.3	44508.7	50986.7	66332.8	72017.5	46124.9	55188.8	81952.6	47615.9	45550	53410.1	46954.3	44550.5	48282.9	52100.1	74684	44118.4	39554.2	43436.2	57933.7	43683.6	42106.2	43266.4	44111.5	49466.9	33537.9	41453.1	NA	50716.4	59355.7	58165.2	42740.1	55863.6	60585.2	53817.1	45039.4	46301.2	65852.8	58299.6	61548.6
_ADEGS[Phospho (STY)]PVEPSQEQDILTSMEASGHLSTNLWHAVTDDDTGQK_.4	25905.4	NA	20466.4	17744.8	36751.1	18539.6	NA	NA	24728.9	15160.5	33982.7	NA	30356.3	NA	25673.9	NA	31148.2	NA	18879.5	24231	NA	NA	25646.2	NA	35872.4	NA	16383.6	22824	NA	NA	NA	17024.3	23844.6	NA	NA	25957.4	NA	13051.8	31939.5	29580.3	13375	19676.9	21579.5	18881.1	12815.1	NA	22370.6	NA	29654.8
_ADEIC[Carbamidomethyl (C)]IAGS[Phospho (STY)]PLT[Phospho (STY)]PR_.2	NA	NA	87061.1	86891	85787.5	105843	81872.9	87092	116170	118340	105815	NA	NA	126573	66876.6	71842.8	NA	62074.2	74928.4	57919.3	146776	100249	90267	NA	119061	158106	74386.7	88603.5	NA	NA	NA	NA	NA	NA	NA	NA	NA	NA	152412	NA	77002.9	NA	85932.8	141910	120341	92317.4	135786	110591	NA
_ADEIC[Carbamidomethyl (C)]IAGS[Phospho (STY)]PLTPR_.2	123049	NA	65157.3	57500.1	135944	64069.3	84201.8	91416.9	80802.4	62502.8	67526.4	56066	128005	90430.6	64310.3	63341	129008	135533	84535.2	80763.7	110918	76737.4	60502.3	55418.7	130108	74301.5	57760.6	66673.3	92297.3	52766.1	58999	63219.4	60406.5	66762.3	51942.3	51128.7	35311.4	68598.8	99477.4	88632.9	60675.1	85358.5	94207.3	108456	62226	67743.4	74308.1	74326.7	65571.8
_ADEPS[Phospho (STY)]S[Phospho (STY)]EES[Phospho (STY)]DLEIDK_.2	2.02868e+06	420977	3.03299e+06	2.96924e+06	2703084	2.52341e+06	3062633	3139726	4259707	4.01248e+06	2.73123e+06	1.49611e+06	2.01257e+06	796141	2.80331e+06	2.58087e+06	748255	1552803	2.5163e+06	2926529	3978723	1.8106e+06	2.84813e+06	1.43106e+06	2.00927e+06	NA	1.74961e+06	2.9713e+06	1.18357e+06	746032	2.03124e+06	2.29326e+06	571238	94108.1	542163	809322	NA	NA	4879181	2790445	830104	298359	1.89723e+06	3.63023e+06	1726641	5393596	7762241	4.83793e+06	59184.3
_ADEPS[Phospho (STY)]S[Phospho (STY)]EES[Phospho (STY)]DLEIDKEGVIEPDTDAPQ[Deamidation (NQ)]EMGDENAEITEEMMDQANDKK_.5	NA	NA	48880.2	NA	NA	NA	NA	90717.6	NA	69690.5	NA	NA	NA	NA	NA	NA	NA	NA	NA	NA	58151	NA	NA	NA	NA	NA	NA	NA	NA	NA	NA	NA	NA	NA	NA	NA	NA	NA	84039.1	NA	NA	NA	NA	NA	NA	NA	NA	80580	NA
_ADEPS[Phospho (STY)]S[Phospho (STY)]EESDLEIDK_.2	700919	229137	610639	542522	432383	592088	677226	625310	786081	626488	602913	490788	644873	521341	601091	513416	415617	453703	773997	529550	730525	620481	511080	556683	632016	201573	512517	648277	419905	603501	635175	631587	398775	359514	351259	355121	NA	897566	926835	817437	455639	528273	639218	856798	733926	817430	1178470	889340	174685
_ADEPSS[Phospho (STY)]EES[Phospho (STY)]DLEIDK_.2	2.66461e+06	888574	2.36555e+06	2261822	2.51182e+06	3.01958e+06	3.1711e+06	3.08215e+06	2.72284e+06	2.19697e+06	1.72162e+06	1.10377e+06	2.37482e+06	2105271	1.99725e+06	1.64987e+06	1.88293e+06	1.45166e+06	2.84794e+06	2.17366e+06	3.40607e+06	1.83229e+06	2091175	1.45596e+06	2933061	851845	1.64561e+06	2.67786e+06	1990643	2.25364e+06	3.0166e+06	2.36213e+06	2.27732e+06	1.84541e+06	2.15718e+06	2.03479e+06	NA	1.14894e+06	4.8111e+06	4447085	3.29891e+06	2.81379e+06	3272694	4.85272e+06	3.0711e+06	5111801	5.90021e+06	3.86522e+06	2401020
_ADEPSS[Phospho (STY)]EES[Phospho (STY)]DLEIDKEGVIEPDTDAPQEMGDENAEITEEMMDQANDKK_.5	NA	NA	22552.9	NA	NA	NA	NA	NA	NA	NA	NA	NA	NA	NA	NA	NA	NA	NA	NA	NA	18212.2	NA	NA	NA	NA	NA	NA	NA	NA	NA	NA	NA	NA	NA	NA	NA	NA	NA	29991.5	NA	NA	NA	NA	NA	20328.7	36574.7	32413.2	29347.3	NA
_ADEPSSEES[Phospho (STY)]DLEIDK_.2	904184	7641.95	526130	568190	1.00212e+06	592971	853858	771230	385560	372302	295840	262936	725932	429201	386313	293004	766269	381086	753215	622201	581951	341002	347311	288794	1.0732e+06	511976	351718	572246	1.05128e+06	510146	790540	622729	898590	1.27583e+06	681107	997646	36581.5	699541	910271	782149	949549	941103	874973	1.06609e+06	539733	809635	786669	561889	626902
_ADFS[Phospho (STY)]PFGNSQGPSR_.2	66821.4	NA	43926.9	48061	NA	44231.5	NA	NA	NA	NA	NA	NA	58659.8	NA	38557.1	NA	46550.9	NA	NA	36988.3	NA	33739.8	NA	NA	79634.2	58555.4	NA	57321.6	74872.9	48418.7	38440.8	42939.6	85285.4	101962	69458.5	88757.4	NA	12506.6	NA	NA	34636.5	NA	NA	NA	42926.3	NA	NA	NA	NA
_ADFTVVAGDEGSSTTGGS[Phospho (STY)]SEENK_.3	NA	NA	56449.9	NA	NA	NA	NA	NA	NA	NA	48353.8	NA	NA	53538.2	NA	51850.7	NA	NA	NA	NA	NA	72053.8	47365.2	NA	72125.4	NA	NA	46054.7	NA	NA	49846.1	NA	80558.1	NA	37601.9	34996.6	11004.8	19527.7	NA	49562.7	37789.9	NA	NA	NA	NA	NA	NA	NA	40919.8
_ADGAPSAAPPDGLLAS[Phospho (STY)]PDLGLLK_.3	24967.8	NA	24449	42918.3	31367	32561.6	NA	NA	NA	18298.4	NA	14124	28129.9	34484.6	29139.6	10538.5	NA	NA	NA	NA	NA	20482.2	NA	19212.8	NA	77049.7	NA	15477	15510.1	NA	NA	NA	NA	NA	NA	14032.5	4048.07	27634.6	66015.2	NA	NA	NA	18832.6	NA	NA	NA	44626.3	18630.1	15002
_ADGYEPPVQ[Deamidation (NQ)]ES[Phospho (STY)]V_.2	129715	NA	126966	116139	146882	125707	136835	155035	120283	109720	126607	122970	138220	140265	100466	82534.2	150895	91011.4	136455	108981	151795	132776	82603.9	122065	139270	146532	118555	119138	137764	132467	130418	119173	129998	169103	113594	129059	27523.8	99064.3	149358	116998	104329	144178	111192	152500	138950	129819	165280	NA	90927.8
_ADGYEPPVQES[Phospho (STY)]V_.2	181935	NA	189064	176385	226240	193158	204090	227254	180016	157872	188364	178417	194900	211721	148453	124357	208915	139075	201099	156308	206851	191731	123154	178235	197781	223223	172482	176750	198181	197081	201705	172720	184585	242454	161024	188296	35636.7	130244	207841	171096	150170	204436	161751	218594	199325	188968	227311	203699	132358
_ADHGVPLPGS[Phospho (STY)]PPPTVALPLPSR_.3	8193.14	NA	NA	NA	11885.4	NA	NA	38841.3	NA	NA	NA	8302.47	8740.51	NA	NA	NA	22797.9	NA	NA	NA	NA	NA	NA	5786.8	7068.47	NA	NA	NA	5658.78	NA	NA	NA	6001.8	NA	NA	NA	NA	NA	NA	NA	NA	NA	NA	NA	7243.45	NA	NA	12708.4	NA
_ADHQPLTEASY[Phospho (STY)]VNLPTIALC[Carbamidomethyl (C)]NTDSPLR_.3	NA	NA	NA	NA	NA	NA	NA	NA	NA	NA	NA	NA	NA	62283.9	NA	NA	NA	NA	NA	NA	NA	NA	NA	NA	NA	NA	NA	NA	62405.6	NA	NA	34726.3	22068.9	22802.8	NA	NA	4919.22	19944.2	NA	NA	NA	NA	NA	30467.7	NA	NA	NA	NA	NA
_ADLIN[Deamidation (NQ)]N[Deamidation (NQ)]LGT[Phospho (STY)]IAK_.2	147937	NA	72670.6	102950	226310	122063	89019.5	91961.1	43155.7	48237.3	124318	149211	45920.1	NA	NA	51045.3	143056	84250.3	68414.7	71375.9	NA	57339.5	53227.9	16863.5	246903	122456	84018	119946	468719	173517	216358	211268	NA	853860	576436	725842	NA	NA	NA	NA	33328.2	NA	38334.9	NA	NA	NA	NA	NA	NA
_ADLIN[Deamidation (NQ)]NLGT[Phospho (STY)]IAK_.2	109805	NA	57721.4	85650.1	172161	70365.8	NA	75008.2	NA	36284.9	101980	125821	101161	NA	37956.2	54883.8	200452	67306.3	63216.6	65318.3	78453.4	NA	55879.8	45288.3	191484	98309.6	67705.2	9350.97	39137.1	124704	166145	162598	45032.8	48348.7	40367.7	50577.3	6343.05	14210.8	NA	NA	11224.7	NA	NA	NA	16048.7	NA	17063.8	NA	NA
_ADLINN[Deamidation (NQ)]LGT[Phospho (STY)]IAK_.2	178023	NA	87048.2	124062	273478	109409	108218	116357	55027.8	58964.3	159443	190170	142343	NA	74170.4	68004.3	252911	NA	85046.4	85385.9	NA	59207.2	74844.8	64758.1	303353	NA	105978	143921	558791	202017	262421	260909	777244	995660	686597	861780	NA	NA	NA	NA	NA	NA	NA	NA	21321.9	NA	NA	NA	NA
_ADLINNLGT[Phospho (STY)]IAK_.2	226207	NA	107985	162059	321728	136549	120133	154814	83381.5	68428.3	186898	239417	179864	145743	73740.4	103099	361638	122953	107545	123519	121848	65554.7	95708.8	90169.7	358915	180727	128035	189260	657963	254483	316055	303438	916217	1.17678e+06	797990	1.00933e+06	10958.3	25408.8	NA	NA	31435.2	36812.9	49652.9	NA	23580	NA	45095.9	NA	49823.5
_ADLNQGIGEPQS[Phospho (STY)]PSR_.2	100855	NA	87670.5	123258	171651	207245	164476	229279	143520	147401	139871	95618	105989	84818.7	75805.4	69720	65146.5	63473.9	111869	99870.6	147167	130148	113365	146682	113515	92979.1	59297.8	113030	98645.3	64438.1	84143.9	91708	101867	92474.8	105194	145387	39461.3	59215.4	120813	85374	72958.4	101236	98202.3	133123	110809	126774	193503	198043	74312.5
_ADLNQGIGEPQS[Phospho (STY)]PSRR_.3	142766	9253.72	108129	164271	204248	274766	230555	259436	178942	195908	184250	139263	138250	100231	74054.9	83979.2	113432	93694.4	148398	113415	181434	171731	155374	188217	125549	140043	86564.5	147489	129196	81810	98047.4	103911	127668	125795	134980	159157	38154.6	71519.1	109983	103933	100623	120966	123615	145075	152660	150360	209020	210542	63081.7
_ADLNQGIGEPQSPS[Phospho (STY)]RR_.3	142908	9548.63	109035	164306	204377	275200	230888	259142	178128	195908	181866	139251	138250	98614.2	74081.3	83774.3	113432	93200.3	148354	113294	181699	171409	155468	188079	124128	140043	86414.9	147489	129337	81715.4	97956.7	105028	127668	125795	134980	159157	38007.6	71519.1	112368	103933	100623	120966	123173	145143	152660	149269	208019	212924	63208.2
_ADMEENEEIS[Phospho (STY)]S[Phospho (STY)]DEEETNVTAQAMQSNNGR_.3	NA	NA	NA	NA	NA	107322	115974	113610	134814	123139	126881	NA	NA	NA	75349.8	101150	NA	NA	78153.4	NA	NA	119846	108431	87392.8	NA	NA	124658	75206	NA	NA	NA	NA	NA	NA	NA	50264.9	NA	NA	NA	48330	NA	NA	NA	58407.3	NA	111802	NA	139282	NA
_ADMTASGS[Phospho (STY)]PDYGQPHK_.2	74249.6	NA	46523.8	50608.9	76971.9	52482.2	56679.5	75550.2	55430.1	47354.6	55246.9	67479.9	70929.9	58710.4	51273.2	49384.3	75269.9	49689.6	59356.9	62953.9	63754	60027.1	56370.7	60542.4	80318.9	73066.6	43823.6	47867.1	68442.2	42559.7	51064.3	55870	50181.3	49506.9	39835.6	35557.1	21897.1	57258.1	97372.7	77105.5	61389.1	59143.6	80660.3	83457.5	88749.9	78268.2	102623	109021	65857.1
_ADNPS[Phospho (STY)]PNLMPASAQAQNAQR_.3	NA	NA	NA	NA	195090	NA	NA	NA	141620	NA	94266.1	NA	NA	NA	NA	NA	NA	151640	NA	131056	NA	NA	117464	NA	NA	NA	NA	NA	212844	134289	NA	NA	NA	NA	NA	NA	26387.6	52370.7	101566	83879.7	67226.3	81684	98972.8	NA	NA	NA	91931.3	84582	49709.6
_ADPSLLGFS[Phospho (STY)]VNASSER_.2	NA	NA	NA	NA	NA	NA	NA	NA	NA	NA	NA	NA	NA	NA	NA	NA	NA	NA	NA	NA	NA	NA	NA	NA	85906.3	NA	NA	84358.5	NA	NA	NA	NA	NA	NA	NA	NA	NA	42673.3	NA	69189	NA	55386.8	NA	NA	NA	NA	67692.6	NA	NA
_ADPSLLGFSVNAS[Phospho (STY)]SER_.2	154887	NA	77967.3	115815	106714	92419.4	67137.3	103905	54703.3	69613.5	63648.8	111417	103468	85084.6	143842	111143	140703	129345	NA	80995.4	75529	140007	NA	NA	131860	69604.2	109352	83201.6	NA	172902	116140	87902.2	106996	139655	NA	NA	15066.2	43555.7	138719	74681.4	48068	NA	45971.5	84528.3	74859.5	51259.1	NA	79331.3	57766.7
_ADRDQS[Phospho (STY)]PFSK_.2	NA	NA	14257.3	NA	NA	NA	NA	NA	NA	NA	NA	NA	NA	NA	NA	NA	NA	NA	NA	NA	NA	NA	NA	NA	NA	NA	NA	NA	NA	9250.8	NA	11693.3	NA	14701.6	NA	NA	8484.97	NA	NA	NA	NA	NA	9034.8	NA	NA	NA	NA	NA	16501.4
_ADREVQAEQPSSSS[Phospho (STY)]PR_.3	195142	6279.86	130948	122315	159204	151403	128462	163193	200237	110688	193503	239458	209349	264172	144545	95833.4	302539	219092	175247	125043	175953	211560	101165	180497	191886	243926	171742	127273	143771	204520	111993	106824	96785.2	131422	76556.7	71776.5	34918.9	79581.9	252129	205864	147664	137930	177792	173432	274390	205909	288001	250726	155295
_ADRPSSLPLDFNDEFS[Phospho (STY)]DLDGVVQQR_.3	40667.4	NA	18837.2	27042.6	34012.5	NA	NA	NA	NA	NA	NA	NA	NA	NA	24810.9	24396	NA	31462.7	42779.8	23621.5	NA	NA	NA	17899	49189.8	31198.9	19463	17173.4	31548	28778.5	20437.4	22361.6	NA	NA	NA	NA	NA	NA	NA	NA	NA	NA	NA	38206.8	NA	NA	NA	NA	19655.5
_ADS[Phospho (STY)]DGAKPEPVAM[Oxidation (M)]AR_.3	38834.5	953.98	33550.8	29874.8	36774	34811.2	31307.2	28962.1	28736.9	10202.7	23810.9	14879.5	56674.2	33550.2	41304.9	24514.9	27627.7	21356.5	58498.8	43372.8	44036.3	20928	15718.5	22631.8	43916.8	24089.3	14550.7	39667.1	30520.8	16694.3	39047.3	38700.9	32963	14971.8	25574.2	36185.2	18455.7	19904.2	25388.5	38757.2	30291.7	29491.7	31851.9	34609.6	NA	23550.2	37068.8	NA	36727.9
_ADS[Phospho (STY)]DGAKPEPVAMAR_.3	755442	16007.2	504553	532409	899711	495009	659594	644426	729685	422338	421186	235450	1.26849e+06	523848	755651	579785	477442	311372	1.00407e+06	871358	923395	264505	494272	353643	780812	256031	195449	675144	661306	214226	729519	555416	476055	130314	386554	577722	88156.5	190405	621501	538158	330027	464656	418275	525039	173239	423602	778593	374655	375139
_ADS[Phospho (STY)]GYLFSGSRPPSQ[Deamidation (NQ)]VSR_.3	40128.9	NA	30690.5	31579.8	51792	43189.6	44797.2	59575.4	32977.2	26364.8	26027.1	24391.5	30400.5	NA	14332.3	11552.7	39271	21054.6	26239.4	27885.7	38090.8	25421.9	19482.1	28899.2	46520.6	32829.1	29277.4	37102.7	25983	NA	NA	15269.6	21314.6	NA	15436.7	22136.2	NA	16687.6	31787.3	NA	20410.3	28650	28774.5	31331.6	21534.4	29208.1	27907.3	29457.1	12361.5
_ADS[Phospho (STY)]GYLFSGSRPPSQVSR_.3	86540.8	NA	63779.8	71504	112058	94059	93166.5	115431	67732.4	55075.3	63057	65185	70117.5	NA	34029.7	28914.8	84593.6	49029.1	55934.1	63857.4	78337.5	58278.1	47883.2	57107.6	93038.5	72922.2	62467.2	72594.9	62155.5	40638.7	39954.6	38040.5	62809.7	51941.7	36642.9	52253.8	16118.1	32068.5	65379.9	44601.3	44982.3	60039.6	58506.4	73765.8	NA	60760.5	56575	61055.1	29464.3
_ADS[Phospho (STY)]LLAVVK_.2	6535.89	NA	3431.3	4653.65	12288.8	4234.33	5209.4	6928.46	3221.1	3715.95	3307.46	7583.88	13340.4	7090.86	4487.53	3018.34	19176.6	5858.74	8562.77	7132.68	6380.95	3571.42	3540.56	4807.23	14313.5	8949.1	4347.93	6075.32	21629.1	5901.55	7736.9	6703.62	9753.53	15788	8789.44	11622	4448.85	6253.1	4463.73	4658.01	5362.82	6168.77	5850.35	6156.16	7882.36	6870.95	6103.61	5383.21	4944.74
_ADS[Phospho (STY)]PHVS[Phospho (STY)]GSEADVASLAPVDSSFSLLSVSHALYDSR_.4	NA	NA	NA	63280.1	NA	NA	NA	NA	NA	NA	NA	46251.4	NA	72062.2	NA	85530.8	NA	NA	NA	62480.6	NA	NA	NA	NA	NA	NA	NA	NA	NA	NA	NA	NA	NA	NA	NA	NA	NA	NA	NA	NA	58020.3	NA	54964.2	NA	59977.8	NA	NA	NA	NA
_ADS[Phospho (STY)]PSIDYAELLQHFEK_.3	23683.2	NA	10681.4	11647.3	19678.4	10536.7	11073.6	13958.7	NA	NA	7250.18	9766.71	17465.2	16678.7	13996.5	10981.3	23973.6	19963.7	10601.9	13339.8	11877	NA	11229.8	NA	22362.5	13867.8	13185.3	8259.65	28119.3	12986.4	12351.4	17371.5	43681.4	40746.8	32334.8	45389.4	NA	NA	21742.8	NA	NA	7432.64	NA	NA	NA	NA	NA	NA	NA
_ADS[Phospho (STY)]PVN[Deamidation (NQ)]GLPK_.2	162832	NA	109988	103842	184048	117280	124790	150786	145038	76763.9	116439	108269	179469	125433	94608.1	56842.4	153095	97039.8	104764	60290.6	134370	106005	58271.3	97501.4	182739	112059	93060.2	106424	156190	109049	106735	131850	123995	103863	34906.5	81575.4	102507	138759	252366	207171	161133	203175	191511	233307	187030	183183	229920	250587	139208
_ADS[Phospho (STY)]PVNGLPK_.2	135631	NA	56028.5	63648.8	111639	71486.9	69502.2	90343.9	78043.9	42570.2	68657.8	69726.8	117109	94120.1	56958.4	35901.3	140588	61771	70226.2	64184.2	88800.1	69647.9	29707.3	78937.3	141830	97929.2	63903.8	73440.3	107662	94552.1	66541.6	72438.4	80923.5	71502.2	36096.2	44750.9	76131	110263	174981	125038	128992	163961	163285	168400	161258	131170	151656	156516	110541
_ADS[Phospho (STY)]VDVEVR_.2	NA	NA	NA	NA	16953.1	NA	NA	11526.7	NA	NA	NA	NA	19403.8	NA	7487.1	10490	NA	NA	NA	NA	NA	NA	NA	NA	15897.7	NA	NA	NA	15055.9	NA	9807.42	NA	10771.9	NA	11961	12687.8	NA	NA	22569.6	NA	NA	8911.43	NA	NA	NA	NA	NA	NA	9721.52
_ADSGPTQPPLSLS[Phospho (STY)]PAPETK_.3	176115	NA	97086.8	124634	284969	193120	196410	198148	144923	127205	130472	197506	250583	246732	133654	114639	405418	164533	191584	152892	218551	178180	139629	255591	219223	170152	110746	126926	273948	176514	186855	162138	177835	223279	139807	186708	110176	206069	183871	158684	143050	180699	183014	185920	212495	189641	173638	259254	169466
_ADSGYLFSGSRPPS[Phospho (STY)]QVSR_.3	45017.9	NA	30957.9	NA	NA	38325.3	NA	NA	NA	NA	NA	NA	NA	NA	NA	NA	NA	NA	NA	NA	38112.4	NA	NA	NA	48573.1	NA	NA	NA	NA	NA	NA	NA	NA	NA	NA	NA	NA	10351.9	29407.2	17760.8	14041.7	NA	30966.3	NA	NA	NA	37543.7	37091.8	NA
_ADSHEGEVAEGKLPS[Phospho (STY)]PPGPQELLDSPPALYAEPLDSLR_.4	94330.7	NA	52352	53107.4	75156.7	NA	60853	63609.4	73485.5	103609	59825	59528.7	91226.8	65439.1	62761.7	63621.2	141824	70025.2	43427.7	61968.7	71320.4	66520.4	57929.3	71095.8	90261.4	NA	67207.8	46655.4	65805.8	38934.1	57984.8	51747.4	61325.4	35033.3	43085.3	50025.7	8129.94	48880	104138	99682.5	60964	67018	71809.2	73615	120735	70146.8	94993.5	80251.9	62745.2
_ADT[Phospho (STY)]LDEY_.1	52347.3	NA	37895.7	45445.5	47204.6	35265.7	28673.3	45677.9	21771.8	18112.6	23132.4	34765.8	75217	35658.8	35414.2	21050.3	38076.5	30447.1	29417.6	38364.7	33950.8	26117.5	10459.8	28044	86138.2	NA	37942.3	54159.8	73025.1	25726.8	39580.8	50276.4	46094.3	30665.7	48258.1	60090.7	NA	20427.7	44068.9	26465.9	20818	31933.6	NA	29341.4	21980.2	29770.5	28691.2	34103.9	42534.5
_ADT[Phospho (STY)]QDEWTPGTAVLTSPVLVPGC[Carbamidomethyl (C)]PSK_.3	NA	NA	NA	NA	83816.7	NA	52178.8	NA	85997	NA	51971.3	NA	NA	NA	NA	NA	120585	65339.8	61550.2	67740.2	NA	NA	NA	45444.8	NA	NA	NA	NA	131903	71171.8	67020.6	72700.3	74022.2	65024.8	58690.7	NA	NA	NA	58543.3	37366.4	34830	36457.1	45560.1	69148.9	41558.6	NA	53964.3	57854	NA
_ADTEGKS[Phospho (STY)]PSHSSSNRPFTPPTSTGGSK_.4	25329.9	NA	14458.9	18189.8	23826.5	22947.1	22877	28970.3	24148.5	19725.4	26055.3	18171.4	28691.9	22362.5	22959.4	16659.2	28732.7	18816.3	20734.6	19389.3	26107.9	23937.2	17489.4	23019.3	21557.6	25452.1	14050.6	17584	16571.3	18006.4	12446.9	15346.7	11803.4	14611.4	12104.9	9908.15	5248.36	15012.4	33027.5	23154	14771.8	17949.3	16901.5	31131.4	26128.1	28760.9	38626.3	29828.7	18234.4
_ADTQDEWTPGTAVLTS[Phospho (STY)]PVLVPGC[Carbamidomethyl (C)]PSK_.3	NA	NA	NA	NA	33721.8	NA	NA	36427.3	NA	NA	NA	NA	NA	NA	NA	NA	NA	NA	NA	NA	NA	NA	NA	NA	NA	NA	NA	NA	34177.5	NA	43023.9	16895.6	38728	44204.9	NA	32056.2	NA	NA	NA	NA	NA	NA	NA	NA	NA	NA	NA	NA	NA
_ADTSQEIC[Carbamidomethyl (C)]S[Phospho (STY)]PRLPISASHSSK_.3	36598.8	NA	NA	NA	37933.6	22106.4	27806.2	32930	28000.9	26244.7	NA	26517.4	39560.3	36798.4	NA	NA	44834.6	NA	NA	NA	NA	NA	19096.1	25355.6	47074.9	NA	NA	NA	22676.6	NA	NA	NA	NA	NA	NA	NA	NA	19373.2	29727.4	NA	14150.4	NA	30447.2	NA	NA	NA	12849.6	47863.9	14333.6
_ADTTTPTPTAILAPGS[Phospho (STY)]PAS[Phospho (STY)]PPGSLEPK_.3	52339.7	29340.9	63913.5	66334.3	NA	57959.4	67735.1	81860	73297.1	67058.4	51245.6	67205.2	62877.2	90214.3	78118.6	70553.8	81130.7	73437.2	84492.3	78894.2	79638.9	76061.7	66154.7	71040.9	57111.1	89525.6	61816.5	78746.4	27542.1	54267.2	58128.2	62414.2	29126.3	44233.8	NA	NA	NA	NA	64918.9	61961.8	33462.2	24065.5	25980.6	47457	57161.4	47653.1	70663.4	52444.2	25845.1
_ADTTTPTPTAILAPGS[Phospho (STY)]PASPPGSLEPK_.3	94468.2	NA	78935.6	101043	138851	115450	90805	125666	122672	115688	124229	116009	126093	103597	79728.2	92273.5	165810	101461	92487.3	115593	112960	101508	106944	107837	115165	195789	76763	110693	118569	99962.8	93954.3	103201	78446.6	138793	73546.3	68847.7	64216.3	38965.7	NA	NA	62842.9	217713	123505	112711	164840	117979	109157	128110	127750
[truncated: 23,909 more rows]
[truncated: 377 more columns]
